# Supplementary material for: Nutrigenetics, omega-3 and plasma lipids/lipoproteins/apolipoproteins with evidence evaluation using the GRADE approach: a systematic review
Source: PubMed Central journal article supplement — BMJ Open. 2022 Feb 22;12(2):e054417. doi: 10.1136/bmjopen-2021-054417 (PMC8867311; doi:10.1136/bmjopen-2021-054417), 2022-02-22
Supplement: bmjopen-2021-054417.draft_revisions.pdf [file bmjopen-2021-054417.draft_revisions.pdf]

# BMJ Open

BMJ Open is committed to open peer review. As part of this commitment we make the peer review history of every article we publish publicly available.

When an article is published we post the peer reviewers' comments and the authors' responses online. We also post the versions of the paper that were used during peer review. These are the versions that the peer review comments apply to.

The versions of the paper that follow are the versions that were submitted during the peer review process. They are not the versions of record or the final published versions. They should not be cited or distributed as the published version of this manuscript.

BMJ Open is an open access journal and the full, final, typeset and author-corrected version of record of the manuscript is available on our site with no access controls, subscription charges or pay-per-view fees (<http://bmjopen.bmj.com>).

If you have any questions on BMJ Open's open peer review process please email [info.bmjopen@bmj.com](mailto:info.bmjopen@bmj.com)

# BMJ Open

## A systematic review of nutrigenetics, omega-3 and plasma 2 lipids/lipoproteins/apolipoproteins with evidence evaluation using the GRADE approach

|                               |                                                                                                                                                                                                                                                                                                                                                                                                                                                                                                                                                                                                                                                                                                                                                                                                                                                                                                                                                                                                                                                                                                                                                                                                                                                    |
|-------------------------------|----------------------------------------------------------------------------------------------------------------------------------------------------------------------------------------------------------------------------------------------------------------------------------------------------------------------------------------------------------------------------------------------------------------------------------------------------------------------------------------------------------------------------------------------------------------------------------------------------------------------------------------------------------------------------------------------------------------------------------------------------------------------------------------------------------------------------------------------------------------------------------------------------------------------------------------------------------------------------------------------------------------------------------------------------------------------------------------------------------------------------------------------------------------------------------------------------------------------------------------------------|
| Journal:                      | <i>BMJ Open</i>                                                                                                                                                                                                                                                                                                                                                                                                                                                                                                                                                                                                                                                                                                                                                                                                                                                                                                                                                                                                                                                                                                                                                                                                                                    |
| Manuscript ID                 | bmjopen-2021-054417                                                                                                                                                                                                                                                                                                                                                                                                                                                                                                                                                                                                                                                                                                                                                                                                                                                                                                                                                                                                                                                                                                                                                                                                                                |
| Article Type:                 | Original research                                                                                                                                                                                                                                                                                                                                                                                                                                                                                                                                                                                                                                                                                                                                                                                                                                                                                                                                                                                                                                                                                                                                                                                                                                  |
| Date Submitted by the Author: | 16-Jun-2021                                                                                                                                                                                                                                                                                                                                                                                                                                                                                                                                                                                                                                                                                                                                                                                                                                                                                                                                                                                                                                                                                                                                                                                                                                        |
| Complete List of Authors:     | Horne, Justine; Université Laval, Centre Nutrition, Santé et Société (NUTRISS), Institut sur la Nutrition et les Aliments Fonctionnels (INAF); Université Laval, School of Nutrition<br>Garneau, Véronique; Université Laval, Centre Nutrition, Santé et Société (NUTRISS), Institut sur la Nutrition et les Aliments Fonctionnels (INAF); Université Laval, School of Nutrition<br>Marcil, Valérie ; University of Montreal, Department of Nutrition; Sainte-Justine University Health Centre, Research Centre<br>Mutch, David; University of Guelph, Department of Human Health and Nutritional Sciences<br>Robitaille, Julie; Laval University, Centre Nutrition, Santé et Société (NUTRISS), Institut sur la Nutrition et les Aliments Fonctionnels (INAF); Laval University, School of Nutrition<br>Rudkowska, Iwona; Université Laval, Department of Kinesiology; Centre de recherche du CHU de Quebec-Université Laval, Endocrinology and Nephrology Unit<br>Sofian, Gabriela; Université Laval, Library<br>Desroches, Sophie; Université Laval<br>Vohl, Marie-Claude; Université Laval, Centre Nutrition, Santé et Société (NUTRISS), Institut sur la Nutrition et les Aliments Fonctionnels (INAF); Université Laval, School of Nutrition |
| Keywords:                     | NUTRITION & DIETETICS, GENETICS, Lipid disorders < DIABETES & ENDOCRINOLOGY                                                                                                                                                                                                                                                                                                                                                                                                                                                                                                                                                                                                                                                                                                                                                                                                                                                                                                                                                                                                                                                                                                                                                                        |
|                               |                                                                                                                                                                                                                                                                                                                                                                                                                                                                                                                                                                                                                                                                                                                                                                                                                                                                                                                                                                                                                                                                                                                                                                                                                                                    |

SCHOLARONE™  
Manuscripts

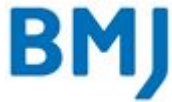

I, the Submitting Author has the right to grant and does grant on behalf of all authors of the Work (as defined in the below author licence), an exclusive licence and/or a non-exclusive licence for contributions from authors who are: i) UK Crown employees; ii) where BMJ has agreed a CC-BY licence shall apply, and/or iii) in accordance with the terms applicable for US Federal Government officers or employees acting as part of their official duties; on a worldwide, perpetual, irrevocable, royalty-free basis to BMJ Publishing Group Ltd ("BMJ") its licensees and where the relevant Journal is co-owned by BMJ to the co-owners of the Journal, to publish the Work in this journal and any other BMJ products and to exploit all rights, as set out in our [licence](#).

The Submitting Author accepts and understands that any supply made under these terms is made by BMJ to the Submitting Author unless you are acting as an employee on behalf of your employer or a postgraduate student of an affiliated institution which is paying any applicable article publishing charge ("APC") for Open Access articles. Where the Submitting Author wishes to make the Work available on an Open Access basis (and intends to pay the relevant APC), the terms of reuse of such Open Access shall be governed by a Creative Commons licence – details of these licences and which [Creative Commons](#) licence will apply to this Work are set out in our licence referred to above.

Other than as permitted in any relevant BMJ Author's Self Archiving Policies, I confirm this Work has not been accepted for publication elsewhere, is not being considered for publication elsewhere and does not duplicate material already published. I confirm all authors consent to publication of this Work and authorise the granting of this licence.

1  
2  
3  
4  
5  
6  
7  
8  
9  
10  
11  
12  
13  
14  
15  
16  
17  
18  
19  
20  
21  
22  
23  
24  
25  
26  
27  
28  
29  
30  
31  
32  
33  
34

1 *A systematic review of nutrigenetics, omega-3 and plasma*  
2 *lipids/lipoproteins/apolipoproteins with evidence evaluation using the*  
3 *GRADE approach*

4 Justine R Horne, PhD, RD<sup>1,2</sup>; Véronique Garneau, MSc, RD<sup>1</sup>; Valérie Marcil<sup>3,4</sup>, PhD, David M  
5 Mutch, PhD<sup>5</sup>, Julie Robitaille, PhD, RD<sup>1,2</sup>, Iwona Rudkowska, PhD, RD<sup>6,7</sup>, Gabriela Sofian,  
6 MSI<sup>8</sup>, Sophie Desroches, PhD, RD<sup>1,2</sup>; **Marie-Claude Vohl, PhD<sup>1,2</sup>\*\***

7 <sup>1</sup> Centre Nutrition, Santé et Société (NUTRISS), Institut sur la Nutrition et les Aliments  
8 Fonctionnels (INAF), Université Laval, Québec City, Québec, G1V 0A6, Canada

9 <sup>2</sup> School of Nutrition, Université Laval, Québec City, Québec, G1V 0A6, Canada

10 <sup>3</sup> Research Centre, Sainte-Justine University Health Centre, Montréal, Québec, H3T 1C5, Canada

11 <sup>4</sup> Department of Nutrition, Université de Montréal, Montréal, Québec, H3T 1J4, Canada

12 <sup>5</sup> Department of Human Health and Nutritional Sciences, University of Guelph, Guelph, Ontario,  
13 N1G 2W1, Canada

14 <sup>6</sup> Endocrinology and Nephrology Unit, CHU de Québec-Université Laval Research Center, Québec  
15 City, Québec, G1V 0A6, Canada

16 <sup>7</sup> Department of Kinesiology, Université Laval, Québec City, Québec, G1V 0A6, Canada

17 <sup>8</sup> Library, Université Laval, Québec City, Québec, G1V 0A6, Canada

18 **\*\*Corresponding Author: marie-claude.vohl@fsaa.ulaval.ca; Tel.: +1-418-656-2131 (ext.**  
19 **404676)**

20 **Ethics Approval Statement:** No ethics approval was required for a systematic review.

21 **Running Head:** Nutrigenetics, omega-3 and lipids/lipoproteins

22 Data described in the manuscript will be made available upon request pending approval  
23 from the corresponding author.

24 **Abbreviations:** ALA (alpha-linolenic acid); CV (coefficient of variation); DHA  
25 (docosahexaenoic acid); EPA (eicosapentaenoic acid); FDA (Food and Drug  
26 Administration); GRADE (Grading of Recommendations Assessment, Development and  
27 Evaluation); HCP (healthcare professional); LD (linkage disequilibrium); nutri-GRS  
28 (nutrigenetic risk score); SNP (single nucleotide polymorphism)

## 29 ABSTRACT

30 **Objectives:** Despite the uptake of nutrigenetic testing through direct-to-consumer  
31 services and healthcare professionals, systematic reviews determining scientific validity  
32 are limited in this field. The objective of this review was to: retrieve, synthesize and  
33 assess the quality (level) of evidence for nutrigenetic approaches related to the effect of  
34 genetic variation on plasma lipid, lipo- and apolipoprotein responsiveness to omega-3  
35 fatty acid intake.

36 **Design:** A systematic review was conducted using three search engines. Included studies  
37 assessed dietary interventions or associations between genetic variants and plasma lipid,  
38 lipo- and apolipoprotein levels based on omega-3 fatty acid intake. Studies were selected  
39 for evidence grading if there were statistically significant nutrigenetic findings for the  
40 same SNP(s) and lipid/lipoprotein/apolipoprotein outcome in at least two independent  
41 studies. Risk of bias was assessed in individual studies. Evidence was evaluated using the  
42 GRADE approach. This systematic review was registered with PROSPERO  
43 (CRD42020185087).

44 **Results:** Out of 1830 articles screened, 65 met the inclusion criteria ( $n=23$  observational,  
45  $n=42$  interventional); of these, 25 met the criteria for evidence evaluation using GRADE.  
46 Overall, current evidence is insufficient for gene-diet associations related to omega-3  
47 fatty acid intake on plasma apolipoproteins, total cholesterol, HDL-cholesterol, LDL-  
48 cholesterol and LDL particle size. However, there is strong (GRADE rating: moderate  
49 quality) evidence to suggest that male *APOE*-E4 carriers (rs429358, rs7412) exhibit  
50 significant triglyceride reductions in response to omega-3-rich fish oil with a dose-  
51 response effect. Moreover, strong (GRADE rating: high quality) evidence suggests that a  
52 31-SNP nutrigenetic risk score can predict plasma triglyceride responsiveness to omega-  
53 3-rich fish oil in adults with overweight/obesity from various ethnicities.

54 **Conclusions:** Most evidence in this area is weak, but two specific nutrigenetic  
55 interactions exhibited strong evidence, with limited generalizability to specific  
56 populations.

57 **Keywords:** nutrigenomics, nutrigenetics, nutritional genomics, genetic risk score,  
58 nutrigenetic risk score, triglycerides, lipids, lipoproteins, omega-3 fatty acid, *APOE*

## 59 STRENGTHS AND LIMITATIONS

- 60 - Strength: Comprehensive systematic review guided by PRSIMA
- 61 - Strength: Critical appraisal of the evidence guided by GRADE
- 62 - Limitation: Inability to conduct a meta-analysis given the comprehensive  
63 overview of studies and thus heterogeneity
- 64 - Limitation: Several included studies without replication; most evidence was low  
65 or very low quality according to GRADE

## 66 INTRODUCTION

67  
68 Cardiometabolic disease is a health concern worldwide (1). Nutrigenetic research  
69 demonstrates that there is significant inter-individual variability in cardiometabolic risk  
70 factor levels, in part based on a combination of genetic and nutrition-related risk factors  
71 (2,3). Consumers indicate great interest in personalized nutrition based on genetics (4,5),  
72 however, a lack of industry oversight (6,7) has led to highly variable scientific validity of  
73 nutrigenetic tests available to consumers. While recognizing that some groups question  
74 whether genetic testing for personalized nutrition is ready for ‘prime time’, Gorman and  
75 colleagues suggested that there are certain specific nutrigenetic interactions with strong  
76 evidence that could be considered for implementation into clinical practice by expert  
77 committees who are responsible for creating dietary guidelines (8). With this in mind,  
78 systematic reviews that include an evaluation of levels of evidence are urgently needed in  
79 order to determine if there are any nutrigenetic associations that may warrant potential  
80 implementation into practice.

81 The dominant omega-3 polyunsaturated fatty acids are eicosapentaenoic acid (EPA) and  
82 docosahexaenoic acid (DHA), which typically come from marine sources (e.g. fish oil),  
83 and alpha-linolenic acid (ALA), which are rich in plant sources (e.g., canola oil) (10,11).  
84 It is well established that higher intakes of omega-3 fatty acids from foods or  
85 supplements (herein after referred to as “omega-3s”), particularly from long-chain EPA  
86 and DHA, tend to improve indicators of cardiometabolic health (11,12). In terms of their  
87 lipid and lipoprotein lowering effects, omega-3s have consistently demonstrated an  
88 impact on triglycerides (TG) (13). High-quality evidence from population-based studies

1  
2  
3 89 suggests that long-chain omega-3s (EPA and DHA) reduce plasma TG by about 15%  
4  
5 90 (13). There is also high-quality evidence suggesting that EPA and DHA can raise high-  
6  
7 91 density lipoprotein (HDL) cholesterol (13). Some studies have further demonstrated an  
8  
9 92 effect of omega-3 on HDL-cholesterol (14), low-density lipoprotein (LDL)-cholesterol  
10  
11 93 (14), total cholesterol (15–17), apolipoproteins (18), and LDL particle size (19). Despite  
12  
13 94 several studies with significant findings for these outcomes, when reviewing the  
14  
15 95 evidence, studies have demonstrated conflicting results for the impact of omega-3 on  
16  
17 96 many lipid profile outcomes (13). Genetic variation could explain this heterogeneity.  
18  
19 97 EPA and DHA have been shown to significantly impact the expression of thousands of  
20  
21 98 genes including those involved in inflammatory and atherogenic pathways (20,21).  
22  
23 99 Evidence now demonstrates that the health impacts of omega-3 intake could differ based  
24  
25 100 on genetic variation (22,23). Despite the potential for omega-3s to have a significant  
26  
27 101 positive impact on health outcomes, population intakes of omega-3s tend to be low (24).  
28  
29 102 While the World Health Organization's Adequate Intake level for adults is 200-250 mg  
30  
31 103 EPA+DHA daily (25,26), the mean reported intake of EPA+DHA in the United States is  
32  
33 104 only approximately 100 mg daily (24). Nutrigenetic interventions have the potential to  
34  
35 105 motivate improvements in dietary intake beyond population-based interventions (27).  
36  
37 106 Additionally, evidence suggests that genetic variability affects health responses to  
38  
39 107 omega-3s (22). Thus, critically appraising and grading the evidence for nutrigenetic  
40  
41 108 interactions related to omega-3s and plasma lipids, lipoproteins and apolipoproteins is an  
42  
43 109 important research priority. The most recent systematic review on nutrigenetic  
44  
45 110 interactions related to omega-3s and intermediate phenotypes of cardiovascular disease  
46  
47 111 was conducted nearly a decade ago, and this study did not evaluate the quality of  
48  
49  
50  
51  
52  
53  
54  
55  
56  
57  
58  
59

1  
2  
3 112 evidence using an established methodology (28). Therefore, we aimed to provide a  
4  
5 113 comprehensive summary of current evidence related to inter-individual variability in  
6  
7 114 plasma lipid, lipoprotein and apolipoprotein responses to omega-3 intake (plant and  
8  
9 115 marine sources) based on genetic variations. Overall, the specific objective of this study  
10  
11 116 was to: systematically search, identify (select), summarize, synthesize and assess the  
12  
13 117 quality of evidence for gene-diet effects on cardiometabolic risk factors - more  
14  
15 118 specifically, plasma lipid, lipoprotein and apolipoprotein responsiveness to omega-3s.  
16  
17  
18  
19

## 20 119 **Methods**

21 120  
22 121 **Patient and Public Involvement:** No patient involvement.  
23

### 24 122 *Literature Search*

25  
26  
27  
28 123 The systematic review protocol was registered with PROSPERO (CRD42020185087).  
29  
30 124 The review process was guided by previously established methods, including a  
31  
32 125 previously outlined five-step systematic review process (29,30). The search engines  
33  
34 126 Embase, Web of Science and Medline OVID were used to conduct the search and screen  
35  
36 127 for articles meeting inclusion criteria, using the comprehensive search terms outlined in  
37  
38 128 Supplementary Table 1, properly combined by Boolean operators. The literature was  
39  
40 129 searched up until August 1, 2020. A PRISMA diagram (Figure 1) guided the article  
41  
42 130 screening process (31).  
43  
44  
45  
46  
47

### 48 131 *Inclusion and Exclusion Criteria*

49  
50  
51 132 Original studies were included if they were written in English or French. Inclusion  
52  
53 133 criteria were developed using the Population, Intervention, Comparison, Outcomes,  
54  
55 134 (PICO) and Population, Exposure, Comparison, Outcomes (PECO) methods (32,33) for  
56  
57  
58  
59  
60



1  
2  
3 135 interventional and observational research, respectively. There were no limitations to the  
4  
5 136 population characteristics (all populations/patient samples were included). Animal studies  
6  
7  
8 137 were excluded. Dietary interventions and observational studies involving omega-3s (total  
9  
10 138 omega-3 or various types; supplemental and/or dietary intake) and comparing lipid and/or  
11  
12 139 lipoprotein and/or apolipoprotein outcomes between different genetic variations based on  
13  
14  
15 140 omega-3 dietary or supplemental intake (and not blood fatty acid levels; e.g. EPA and  
16  
17 141 DHA in red blood cells) were included. In included studies, samples had to be stratified  
18  
19 142 on the basis of genetic variation. Specific lipid and lipoprotein outcomes of interest were:  
20  
21 143 HDL-cholesterol, LDL-cholesterol, LDL particle size, total cholesterol, apolipoproteins,  
22  
23 144 and triglycerides (TG). Studies that reported ratios of the aforementioned lipid parameters  
24  
25 145 (e.g. HDL-cholesterol to total cholesterol ratio) were also included. Both observational  
26  
27 146 and interventional studies were included, as well as single-gene, polygenic and genome-  
28  
29 147 wide association studies (GWAS). Differences in study designs and methods were  
30  
31 148 considered when developing the overall evidence grades, as further detailed below.  
32  
33  
34  
35

#### 36 149 *Article Selection and Data Extraction*

37  
38  
39  
40 150 Two independent investigators (JH and VG) screened articles using the computer  
41  
42 151 software *Covidence* (including title, abstract, and full-text screening) and extracted data  
43  
44 152 from the included articles. Reference lists of included articles and of a systematic review  
45  
46 153 on a similar topic (34) were also screened for relevant articles. Data extraction templates  
47  
48 154 were piloted by two independent investigators (JH and VG) on ten included studies and  
49  
50 155 revised accordingly. The final data extraction templates included the following  
51  
52 156 components for each study: first author name and year, study design, genetic approach,  
53  
54 157 population and sample size, study duration (interventional studies only), genes and single  
55  
56  
57  
58  
59  
60

1  
2  
3 158 nucleotide polymorphisms (SNPs) analyzed with rs numbers, quantity and type of  
4  
5 159 omega-3, comparisons (e.g. a control group or different amount/type of omega-3s as well  
6  
7  
8 160 as genetic grouping), lipid/lipoprotein outcome(s), whether or not the study reported that  
9  
10 161 they followed STREGA guidelines and a summary of statistically significant study  
11  
12 162 findings relevant to the research question. Corresponding authors of included studies  
13  
14 163 were contacted as needed to provide clarity and/or additional information about the  
15  
16 164 included studies.

17  
18  
19  
20 165 *Evidence Grading*

21  
22  
23 166 Upon reading all full-text articles included, and summarizing the body of evidence,  
24  
25 167 SNPs/nutrigenetic risk scores (nutri-GRSs) and subsequent  
26  
27 168 lipid/lipoprotein/apolipoprotein outcomes were systematically selected for evidence  
28  
29 169 grading based on the following predetermined replication criteria: statistically significant  
30  
31 170 nutrigenetic results for the same SNP(s)/nutri-GRS [or SNPs in strong linkage  
32  
33 171 disequilibrium (LD)] and lipid/lipoprotein outcome in at least two studies. The Grading  
34  
35 172 of Recommendations Assessment, Development and Evaluation (GRADE) approach  
36  
37 173 indicates that a single study rarely (if ever) results in strong evidence, but two studies  
38  
39 174 (typically RCTs) can indicate strong evidence if they are graded highly using the  
40  
41 175 GRADE criteria (35). Prior to selecting the genetic variants and  
42  
43 176 lipid/lipoprotein/apolipoprotein outcomes for evidence grading, LD was assessed using  
44  
45 177 the SNIPA SNP Annotator Software (36) for genes located on the same chromosome and  
46  
47 178 arm (determined using the Online Mendelian Inheritance in Man® [OMIM] database) as  
48  
49 179 outlined in the summary of results' tables in the column labelled 'Cytogenic Location of  
50  
51 180 Gene(s)' (Tables 1 and 2). Strong LD was defined as  $r^2 > 0.8$  and location  $< 250$  kb away  
52  
53  
54  
55  
56  
57  
58  
59  
60

1  
2  
3 181 from the index SNP location. SNPs in strong LD were considered together for the  
4  
5 182 purposes of evidencing grading.  
6  
7  
8  
9 183 Based on our abovementioned predetermined criteria for study selection for evidence  
10  
11 184 grading, SNPs that were not included in the evidence grading process likely have weak  
12  
13 185 evidence (at minimum due to lack of replication). According to the GRADE guidelines,  
14  
15 186 when only a single study exists indicating significant findings for an outcome of interest  
16  
17 187 (especially when the study is observational), the overall quality of the evidence is  
18  
19 188 generally rated to be low or very low (37). Therefore, our study selection prioritization  
20  
21 189 process aimed to filter out evidence that would be deemed low or very low quality. Two  
22  
23 190 authors (JH and VG) critically appraised the selected nutrigenetic interactions using the  
24  
25 191 GRADE methodology (37,38). Nutrigenetic interactions were grouped according to  
26  
27 192 studies assessing the same SNP(s)/nutri-GRS and lipid/lipoprotein/apolipoprotein  
28  
29 193 outcome, and the quality of the body of evidence was rated; this process was guided by  
30  
31 194 the GRADE Evidence Profile, which included consideration of risk of bias,  
32  
33 195 inconsistency, indirectness, imprecision, publication bias, plausible confounding, dose-  
34  
35 196 response and other factors (37). For example, different sources of omega-3s (e.g.  
36  
37 197 EPA+DHA vs. ALA; food sources vs. supplementation) were taken into consideration  
38  
39 198 when grading the evidence through the analysis of indirectness within the GRADE  
40  
41 199 approach (37,38). Risk of bias was assessed in each of the included interventional and  
42  
43 200 observational studies using the National Institutes of Health Study Quality Assessment  
44  
45 201 Tools, in line with recently published recommendations for risk of bias assessments (39).  
46  
47 202 To assess measures of precision, coefficients of variation (CV) were calculated based on  
48  
49 203 outcome means (mean change or absolute values – whichever was used for the analyses)  
50  
51  
52  
53  
54  
55  
56  
57  
58  
59  
60

1  
2  
3 204 and standard deviations. In cases where standard errors of the mean were reported, these  
4  
5 205 were converted to standard deviation to calculate the CV. The nutrigenetic interactions  
6  
7  
8 206 were each given an evidence grade of high, moderate, low or very low.  
9

## 11 207 **Results**

12 208  
13 209 Figure 1 outlines the PRISMA Flow Diagram, which was used to guide the systematic  
14  
15  
16 210 review. Tables 1 and 2 provide a summary of the 65 included studies. The results  
17  
18 211 columns of Tables 1 and 2 (far right) indicate only nutrigenetic findings that were  
19  
20 212 statistically significant. Any results related to the studies' analyzed SNPs and outcomes  
21  
22 213 of interest that were not statistically significant are not indicated in the results column.  
23  
24 214 No studies explicitly reported that they followed STREGA guidelines. LD analysis of  
25  
26 215 SNPs tested in different studies revealed strong LD in several SNPs from the *FADS* gene  
27  
28 216 cluster (see Table 3 footnote). As such, LD was taken into consideration in the selection  
29  
30 217 of nutrigenetic interactions selected for evidence grading.  
31  
32  
33

### 35 218 *Observational Studies*

36  
37  
38 219 Of the 65 included studies, 23 were observational with the majority of these being cross-  
39  
40 220 sectional, as outlined in Table 1. A total of 62,221 participants were included in the  
41  
42 221 observational studies. These studies assessed correlations among a number of different  
43  
44 222 genetic variations and outcomes, with several studies assessing genetic variations in the  
45  
46 223 *FADS* gene cluster (40–46), *TNF $\alpha$*  (47–49) and *PPAR $\alpha$*  (50–52). Most studies (n=13)  
47  
48 224 assessed total omega-3s (40,45–47,49,52–59). The intake and type of omega-3s,  
49  
50  
51 225 lipid/lipoprotein/apolipoprotein outcomes and associations revealed from these studies  
52  
53  
54 226 were variable as further detailed in Table 1. In the observational studies assessing genetic  
55  
56  
57  
58  
59  
60

1  
2  
3 227 variation in the *FADS* gene cluster, some studies indicated significant gene-diet findings  
4  
5 228 related to HDL-cholesterol, LDL-cholesterol, TG, total-cholesterol while other studies  
6  
7  
8 229 demonstrated no significant gene-diet interactions for these outcomes thus indicating  
9  
10 230 notable inconsistency among the results, while considering that SNPs differed by studies  
11  
12 231 (40–46). In the observational studies focused on genetic variation in the *TNF $\alpha$*  gene, there  
13  
14  
15 232 was some evidence of a gene-diet relationship for omega-3 and LDL-cholesterol, total-  
16  
17 233 cholesterol and total-cholesterol:HDL-cholesterol ratio, but again, results differed  
18  
19 234 between studies (47–49). For gene-diet relationships and *PPAR $\alpha$*  genetic variation,  
20  
21 235 individual studies indicated significant findings related to total-cholesterol, LDL-  
22  
23 236 cholesterol, TG, apoC-III and LDL peak particle diameter (50–52). Comprehensive  
24  
25  
26 237 details of the observational studies are outlined in Table 1.  
27  
28

### 29 238 *Interventional Studies*

30  
31  
32  
33 239 Of the 65 included studies, 42 were interventional including 16 randomized trials. Non-  
34  
35 240 randomized studies included single arm clinical trials and sequential non-randomized  
36  
37 241 cross-over interventions. For interventional studies, n=6,225 upon combining all sample  
38  
39  
40 242 sizes of the included studies. Again, these studies assessed relationships between a  
41  
42 243 number of different genetic variants and study outcomes. In more recent years, several  
43  
44 244 studies (n=8) used a nutri-GRS or polygenic approaches (60–67) given the plausibility  
45  
46 245 that many gene-lipid/lipoprotein/apolipoprotein and omega-3 interactions are polygenic  
47  
48 246 in nature. Numerous studies assessed genetic variations in the *FADS* gene cluster  
49  
50  
51 247 (60,61,68–70), *APOE* (60,70–79), *CD36* (66,80,81), *PPAR $\gamma$ 2* (61,66,82–84) and *PPAR $\alpha$*   
52  
53 248 (82,85,86). Among these studies, results related to significant gene-diet (omega-3)  
54  
55  
56 249 associations influencing lipid/lipoprotein outcomes were generally inconsistent except for  
57  
58  
59

1  
2  
3 250 *APOE* (rs429358 and rs7412), omega-3 and TG in males only (70–74,76–79), and for a  
4  
5 251 31-SNP nutri-GRS, omega-3 and TG (64,65). There was also consistent evidence to  
6  
7 252 indicate a lack of association among *PPAR* $\gamma$ 2 (rs1801282) genetic variation, EPA+DHA  
8  
9 253 and LDL cholesterol (61,66,83,84,87). Most studies (n=40) used supplemental EPA  
10  
11 254 and/or DHA sources of omega-3s for the dietary intervention (see Table 2). The  
12  
13 255 dosage/intake and type of omega-3s were variable with EPA and/or DHA dosages  
14  
15 256 ranging from 0.5-3.7 g/day across different studies, and one study with an ALA  
16  
17 257 intervention dosage of 8.1 g/day, as further detailed in Table 2.

#### 22 258 *Levels of Evidence Using GRADE*

23  
24  
25  
26 259 A total of 25 articles were included in the evidence grading process, representing 11  
27  
28 260 unique nutrigenetic interactions as outlined in Tables 3 and 4, and Supplementary Table  
29  
30 261 2. Through the GRADE process, it was determined that there is strong evidence (GRADE  
31  
32 262 rating: moderate quality) for *APOE* genotypes (rs7412, rs429358), omega-3s and TG  
33  
34 263 lowering in male adults only (70–74,76–79). This evidence suggests that adult males (but  
35  
36 264 not females) with the *APOE*-E3/E4 or E4/E4 genotype (rs429358, rs7412) tend to  
37  
38 265 experience significant reductions in TG in response to 0.7-3.7 g/day of EPA and/or DHA,  
39  
40 266 with higher dosages demonstrating greater TG lowering effects (70–74,76–79).  
41  
42 267 Furthermore, it was determined that there is strong evidence (GRADE rating: high  
43  
44 268 quality) for using a 31-SNP nutri-GRS to assess the effectiveness of omega-3s for TG  
45  
46 269 lowering in adults with overweight/obesity in various ethnicities (64,65). The evidence  
47  
48 270 suggests that in adults with overweight/obesity, lower genetic risk scores demonstrate  
49  
50 271 greater responsiveness to omega-3 supplementation (64,65).  
51  
52  
53  
54  
55  
56  
57  
58  
59  
60

1  
2  
3 272 All other evidence that was evaluated was determined to be weak (GRADE rating: low or  
4  
5 273 very low quality), as further detailed in Table 3. Imprecision, indirectness, and  
6  
7 274 inconsistency were common reasons for downgrading the evidence (refer to Table 3  
8  
9  
10 275 footnote). There was evidence for a plausible mechanism of action for most of the  
11  
12 276 nutrigenetic interactions that were graded; evidence of a dose response was less common.  
13  
14  
15  
16  
17  
18  
19  
20  
21  
22  
23  
24  
25  
26  
27  
28  
29  
30  
31  
32  
33  
34  
35  
36  
37  
38  
39  
40  
41  
42  
43  
44  
45  
46  
47  
48  
49  
50  
51  
52  
53  
54  
55  
56  
57  
58  
59  
60

**Table 1: Summary of observational studies**

| Author, Year                      | Study Design                                         | Genetic Approach                       | Population (sample size included in analyses)                                        | Gene(s), SNP(s)                                                                                                                              | Cytogenic Location of Gene(s)                                              | Quantity, Source and Type of Omega-3 <sup>1</sup>                                                                     | Comparators                                                                                                                                                                                   | Plasma Lipid/ Lipoprotein Outcome(s) | Summary of Statistically Significant Study Findings Relevant to the Research Question <sup>2</sup>                                                                                                                                                                                                                                                                                                                                                                                                                               |
|-----------------------------------|------------------------------------------------------|----------------------------------------|--------------------------------------------------------------------------------------|----------------------------------------------------------------------------------------------------------------------------------------------|----------------------------------------------------------------------------|-----------------------------------------------------------------------------------------------------------------------|-----------------------------------------------------------------------------------------------------------------------------------------------------------------------------------------------|--------------------------------------|----------------------------------------------------------------------------------------------------------------------------------------------------------------------------------------------------------------------------------------------------------------------------------------------------------------------------------------------------------------------------------------------------------------------------------------------------------------------------------------------------------------------------------|
| Bouchard-Mercier et al. 2011 (88) | Cross-Sectional                                      | Single SNP                             | Healthy Caucasian men and women from INFOGENE study (n=674)                          | <i>PPARα</i> , L162V (rs1800206)<br><i>PPARγ</i> , P12A (rs1801282)<br><i>PPARδ</i> , -87T→C (rs2016520)                                     | <i>PPARα</i> : 22q13.31<br><i>PPARγ</i> : 3p25.2<br><i>PPARδ</i> : 6p21.31 | Mean:<br>L162: 2.8 g/day<br>V162: 2.9 g/day (unclear if food and/or supplement sources)                               | Minor allele carriers vs. Non-carriers                                                                                                                                                        | LDL-PPD                              | <b>LDL-PPD</b> : In a model including age, sex, TG, BMI, energy and omega-3 intakes and <i>PPARα</i> L162V (rs1800206) polymorphism, the interaction of <i>PPARα</i> L162V and omega-3 intakes explained 0.62% of the variance in LDL-PPD.                                                                                                                                                                                                                                                                                       |
| Bodhini et al. 2017 (89)          | Cross-Sectional                                      | Single SNP                             | Adults with normal glucose tolerance (n=821) and adults with type 2 diabetes (n=861) | <i>MC4R</i> , rs17782313<br><i>TCF7L2</i> , rs12255372<br><i>TCF7L2</i> , rs7903146                                                          | <i>MC4R</i> : 18q21.32<br><i>TCF7L2</i> : 10q25.2-q25.3                    | <b>Low</b> : 0.38 g/day ALA<br><b>Moderate</b> : 0.58 g/day ALA<br><b>High</b> : 0.89 g/day ALA (means) (food)        | Major allele homozygotes vs. Minor allele carriers                                                                                                                                            | HDL-c                                | <b>HDL-c</b> : 'T' allele carriers of <i>TCF7L2</i> rs12255372 within the lowest tertile of ALA intake (mean=0.38 g/day) exhibited higher levels of HDL-c compared to GG homozygotes in the lowest tertile of ALA intake (mean=0.38 g/day)                                                                                                                                                                                                                                                                                       |
| Chen et al. 2019 (40)             | Cross-Sectional Analysis within a Prospective Cohort | Single SNP, Haplotype and Gene-Centric | Adults of Swedish ancestry from the GLACIER cohort (n=5160)                          | All variations in the <i>FADS1-FADS2-FADS3</i> gene cluster and variation within the 200kb upstream and downstream of the <i>FADS</i> region | <i>FADS1</i> : 11q12.2<br><i>FADS2</i> : 11q12.2<br><i>FADS3</i> : 11q12.2 | <b>High</b> : >1.6 g/day<br><b>Low</b> : <1.6 g/day (food)                                                            | Entire <i>FADS</i> region gene-centric analysis and Variation in individual <i>FADS</i> cluster SNPs: rs174570, rs174602, rs74771917, rs3168072, rs12577276, rs7115739 and Haplotype analysis | HDL-c<br>LDL-c<br>TG<br>Total-c      | <b>HDL-c</b> : Significant interaction of rs174570 and omega-3 on HDL-c<br><b>LDL-c</b> : Significant interaction of rs174602 and omega-3 on LDL-c<br><b>TG</b> : Gene-centric analyses demonstrated a significant interaction between variation in the <i>FADS</i> gene cluster and omega-3 intake on TG<br><b>Total-c</b> : Significant interaction of rs174602 and omega-3 on total-c ('C' allele carriers exhibited lower total-c with low omega-3 intake, while no such relationship was observed with high omega-3 intake) |
| Ching et al. 2019 (90)            | Cross-Sectional                                      | Single SNP                             | Vegetarian adults of Malaysian ancestry (n=200)                                      | <i>FADS1</i> , rs174547                                                                                                                      | <i>FADS1</i> : 11q12.2                                                     | <b>Low</b> : ≤0.45 g/day ALA<br><b>Moderate</b> : 0.46-0.64 g/day ALA<br><b>High</b> : >0.64 g/day ALA (means) (food) | Comparison between three genotypes                                                                                                                                                            | HDL-c<br>TG                          | <b>HDL-c</b> : The TT genotype had significantly lower HDL-c when ALA intake was in the moderate intake range, but there were no significant gene-omega-3 interaction on lipid levels                                                                                                                                                                                                                                                                                                                                            |
| Dumont et al.                     | Cross-                                               | Single SNP                             | Adolescents of                                                                       | <i>FADS1</i> ,                                                                                                                               | <i>FADS1</i> : 11q12.2                                                     | <b>High</b> : >1.4 g/day                                                                                              | Major allele                                                                                                                                                                                  | HDL-c                                | <b>Total-c</b> : Significant interaction whereby the minor allele                                                                                                                                                                                                                                                                                                                                                                                                                                                                |



|                                         |                                                                                       |               |                                                                                                 |                                           |                        |                                                                                                                                                                                                                                     |                                                                                                                            |                                 |                                                                                                                                                                                                                                                                                                                                                                                                                                                                                                                                                                |
|-----------------------------------------|---------------------------------------------------------------------------------------|---------------|-------------------------------------------------------------------------------------------------|-------------------------------------------|------------------------|-------------------------------------------------------------------------------------------------------------------------------------------------------------------------------------------------------------------------------------|----------------------------------------------------------------------------------------------------------------------------|---------------------------------|----------------------------------------------------------------------------------------------------------------------------------------------------------------------------------------------------------------------------------------------------------------------------------------------------------------------------------------------------------------------------------------------------------------------------------------------------------------------------------------------------------------------------------------------------------------|
| 2011 (42)                               | Sectional                                                                             |               | European ancestry (n=573)                                                                       | rs174547                                  |                        | ALA<br><b>Low:</b> ≤1.4 g/day ALA (unclear if food and/or supplement sources)                                                                                                                                                       | homozygotes vs. Minor allele carriers                                                                                      | LDL-c<br>TG<br>Total-c          | (CT+TT genotype) was associated with lower total-c when ALA intake is high as compared to when intake is low. This remained significant after assessing the interaction using ALA intake as a continuous variable.                                                                                                                                                                                                                                                                                                                                             |
| Dumont et al. 2018 (43)                 | Cross-Sectional                                                                       | Single SNP    | Men and women aged 35 to 74 years from the MONA LISA Study of three French populations (n=3069) | <i>FADS1</i> , rs174547                   | <i>FADS1</i> : 11q12.2 | <b>Low:</b> 0.6 g/day ALA (mean)<br><b>Median:</b> 0.8 g/day ALA (stratified by median for analyses)<br><b>High:</b> 1.3 g/day ALA (mean) (food and supplement)                                                                     | Comparison between three genotypes                                                                                         | HDL-c<br>LDL-c<br>TG<br>Total-c | --                                                                                                                                                                                                                                                                                                                                                                                                                                                                                                                                                             |
| Fallaize et al. 2016 (53)               | Cross-Sectional (Baseline) and Longitudinal Analyses within a Randomized Intervention | Single SNP*   | Healthy adults enrolled in the Food4Me European trial (n=1466)                                  | <i>APOE</i> , rs429358, rs7412            | <i>APOE</i> : 19q13.32 | <b>High:</b> >0.67 %kcal<br><b>Low:</b> <0.67 %kcal<br><b>Increased Intake:</b> reduced omega-3 intake from baseline<br><b>Decreased Intake:</b> decreased omega-3 intake from baseline (unclear if food and/or supplement sources) | <i>APOE</i> -E4- vs. <i>APOE</i> -E4+                                                                                      | Total-c                         | <b>Total-c:</b> Cross-sectional (baseline) analysis demonstrated a significant genotype effect for <i>APOE</i> , omega-3 intake, and total-c. Longitudinal analysis (baseline to month 6) demonstrated a significant genotype effect for <i>APOE</i> , change in omega-3 intake (increase or decrease) and total-c.                                                                                                                                                                                                                                            |
| Fontaine-Bisson and El-Sohemy 2007 (91) | Cross-Sectional                                                                       | Genetic Score | Men and women aged 20-29 years (n=595)                                                          | <i>TNFα</i> , rs361525, rs1800629         | <i>TNFα</i> : 6p21.33  | Intake range: 0.2-4.6 %kcal (mean intakes were 0.7 %kcal for 0/0, 0.7% kcal for 0/1 and 0.6%kcal for 1/0) (food)                                                                                                                    | No minor allele ('A') for both SNPs (0/0) vs. One minor allele for rs361525 (1/0) vs. One minor allele for rs1800625 (0/1) | HDL-c                           | --                                                                                                                                                                                                                                                                                                                                                                                                                                                                                                                                                             |
| Fontaine-Bisson et al. 2009 (92)        | Cross-Sectional                                                                       | Single SNP    | Healthy men and women aged 20-29 years (n=593)                                                  | <i>NF-κB</i> -94Ins/Del ATTG (rs28362491) | <i>NF-κB</i> : 4q24    | Mean intake: 0.7 %kcal (unclear if food and/or supplement sources)                                                                                                                                                                  | Ins/Ins vs. Ins/Del vs. Del/Del                                                                                            | HDL-c                           | <b>HDL-c:</b> Significant interaction between <i>NF-κB</i> genotype and omega-3 intake on HDL-c                                                                                                                                                                                                                                                                                                                                                                                                                                                                |
| Hellstrand et al. 2012 (93)             | Cross-Sectional                                                                       | Single SNP    | Healthy men and women aged 45-68 years from Sweden (n=4635)                                     | <i>FADS</i> , rs174547                    | <i>FADS</i> : 11q12.2  | <b>Low:</b> ≤0.14 %kcal long-chain omega-3<br><b>Moderate:</b> 0.14-0.28 %kcal long-chain omega-3<br><b>High:</b> >0.28 %kcal long-chain omega-3 (tertiles)                                                                         | TT vs. TC vs. CC                                                                                                           | HDL-c<br>LDL-c<br>TG            | <b>LDL-c:</b> Significant interaction between <i>FADS</i> rs174547 genotype and long-chain omega-3 on LDL-c whereby the 'C' allele was significantly associated with lower LDL-c when long-chain omega-3 intake was in the lowest tertile (but not in the moderate or highest tertile). High long-chain omega-3 intake was associated with significantly higher LDL-c for CC and TC genotypes but not TT genotypes. Stratified analysis based on sex demonstrated that these significant interactions remained for men, but not women, however there was not a |

|                                    |                     |            |                                                                                                                     |                                                                                    |                |                                                                                                                                           |                                                                                          |                                                  |                                                                                                                                                                                                                                                                                                                                                                                                                                                                                                                                                                                                                              |
|------------------------------------|---------------------|------------|---------------------------------------------------------------------------------------------------------------------|------------------------------------------------------------------------------------|----------------|-------------------------------------------------------------------------------------------------------------------------------------------|------------------------------------------------------------------------------------------|--------------------------------------------------|------------------------------------------------------------------------------------------------------------------------------------------------------------------------------------------------------------------------------------------------------------------------------------------------------------------------------------------------------------------------------------------------------------------------------------------------------------------------------------------------------------------------------------------------------------------------------------------------------------------------------|
|                                    |                     |            |                                                                                                                     |                                                                                    |                | of intake reported only for certain significant findings) (food and supplement)                                                           |                                                                                          |                                                  | significant difference in interactions by sex.                                                                                                                                                                                                                                                                                                                                                                                                                                                                                                                                                                               |
| Hosseini-Esfahani et al. 2017 (94) | Nested Case-Control | Single SNP | Healthy men and women aged ≥18 years from Iran (n=1634)                                                             | ZNT8, rs13266634                                                                   | ZNT8: 8q24.11  | <b>Tertiles for omega-3:</b><br>Low: <0.38 %kcal<br>Moderate: 0.38-0.54 %kcal<br>High: >0.54 %kcal (food)                                 | CC vs. CT+TT                                                                             | HDL-c<br>TG                                      | <b>HDL-c:</b> Significant interaction between ZNT8 rs13266634 genotype and omega-3 intake on the risk of low HDL-c whereby CC genotypes exhibited a decreased risk of low HDL-c with increasing intake of omega-3; this was not observed in the CT+TT genotype group.<br><b>TG:</b> Significant interaction between ZNT8 rs13266634 genotype and omega-3 intake on the risk of high TG whereby CC genotypes exhibited a decreased risk of high TG with increasing intake of omega-3; this was not exhibited in the CT+TT genotype group.                                                                                     |
| Jang et al. 2014 (95)              | Cross-Sectional     | Single SNP | Adult: Men and women aged 40-69 from Korea (n=4205)<br>Children: Boys and girls aged 8-13 years from Korea (n=1548) | PCSK5, rs1029035                                                                   | PCSK5: 9q21.13 | Based on overall median intake (further detailed elsewhere (95)):<br>Low: <0.4 %kcal<br>High: >0.4 %kcal (food)                           | CC vs. CA vs. AA                                                                         | HDL-c                                            | <b>HDL-c:</b> Significant interaction between PCSK5 rs1029035 and omega-3 on HDL-c in male children and male adults. 'C' allele carriers exhibit a tendency to decrease HDL-c with omega-3, while AA genotypes exhibit the opposite effect.                                                                                                                                                                                                                                                                                                                                                                                  |
| Joffe et al. 2010 (96)             | Cross-Sectional     | Single SNP | Black women from South Africa, normal weight or with obesity (n=138)                                                | TNFA, rs1800629                                                                    | TNFA: 6p21.33  | ALA (amount not reported/cannot determine) (food)                                                                                         | GG vs. GA+AA                                                                             | HDL-c<br>LDL-c<br>TG<br>Total-c<br>Total-c:HDL-c | <b>Total-c:HDL-c ratio:</b> Significant interaction between TNFA, rs1800629 genotypes and %kcal from ALA whereby increasing %kcal from ALA was associated with increases in Total-c:HDL-c for GG genotypes but decreases in Total-c:HDL-c ratio for GA+AA genotypes                                                                                                                                                                                                                                                                                                                                                          |
| Joffe et al. 2012 (97)             | Cross-Sectional     | Single SNP | Black and white women from South Africa, normal weight or with obesity (n=263)                                      | TNFA, rs361525                                                                     | TNFA: 6p21.33  | <b>Median Intakes:</b><br>omega-3: 0.28-0.36 % kcal<br>ALA: 0.21-0.26 %kcal<br>EPA: 0.02 %kcal<br>DHA: 0.04-0.08 %kcal (food)             | GG vs. GA(+AA for one participant: black, normal weight)                                 | HDL-c<br>LDL-c<br>TG<br>Total-c<br>Total-c:HDL-c | <b>LDL-c:</b> Significant interaction for Caucasian women whereby LDL-c decreased with increasing %kcal from EPA in the GG genotype but not the GA genotype of TNFA, rs361525.<br><b>Total-c:</b> Significant interaction for white women whereby total-c decreased with increasing EPA and DHA intakes in the GG genotype group but not the GA genotype group of TNFA rs361525 but individual rates were not significant.<br><b>Total-c:HDL-c ratio:</b> Significant interaction for black women whereby Total-c:HDL-c decreased within increasing %kcal from omega-3 in the GA genotype group but not GG of TNFA rs361525. |
| Joffe et al. 2014 (98)             | Cross-Sectional     | Single SNP | Black and white women from South Africa, normal weight or with obesity (n=268)                                      | IL-6, -174 G>C, IVS3 (rs1800795), +281 G>T, IVS4 (rs1554606), +869 A>G (rs2069845) | IL-6: 7p15.3   | Black Women (%kcal/day): 0.28 omega-3, 0.21 ALA, 0.02 EPA, 0.04 DHA (normal weight); 0.36 omega-3, 0.22 ALA, 0.04 EPA, 0.08 DHA (obesity) | Major allele homozygotes vs. Minor allele carriers or Comparison between three genotypes | HDL-c<br>LDL-c<br>TG<br>Total-c<br>Total-c:HDL-c | The following results were statistically significant only in white women, but not in black women:<br><b>HDL-c:</b> Significant interaction whereby HDL-c increased with: increasing omega-3 and/or DHA and/or ALA intake in IL-6 rs1800795 C allele carriers and increasing ALA intake in IL-6 rs1554606 T allele carriers. HDL-c decreased with: increasing EPA and/or DHA intake in IL-6 rs2069845 G allele carriers.<br><b>TG:</b> Significant interaction whereby TG reduced with increasing EPA intake in IL-6 rs1800795 C allele carriers<br><b>Total-c:HDL-c:</b> Significant interaction whereby total-c:HDL-c       |

|                              |                                                                                                                         |            |                                                                                 |                                                                                        |                          |                                                                                                                                                                                                                  |                                                    |                                 |                                                                                                                                                                                                                                                         |
|------------------------------|-------------------------------------------------------------------------------------------------------------------------|------------|---------------------------------------------------------------------------------|----------------------------------------------------------------------------------------|--------------------------|------------------------------------------------------------------------------------------------------------------------------------------------------------------------------------------------------------------|----------------------------------------------------|---------------------------------|---------------------------------------------------------------------------------------------------------------------------------------------------------------------------------------------------------------------------------------------------------|
|                              |                                                                                                                         |            |                                                                                 |                                                                                        |                          | White Women (%kcal/day): 0.33 omega-3, 0.26 ALA, 0.01 EPA, 0.05 DHA (normal weight); 0.32 omega-3, 0.25 ALA, 0.02 EPA, 0.05 DHA (food)                                                                           |                                                    |                                 | ratio decreased with: increasing EPA intake in <i>IL-6</i> rs1800795 CC genotypes and <i>IL-6</i> rs1554606 TT genotypes, increasing DHA intake in <i>IL-6</i> rs1800795 CC genotypes, and increasing ALA intake in <i>IL-6</i> rs1554606 TT genotypes. |
| Lai et al. 2006 (99)         | Cross-Sectional                                                                                                         | Single SNP | Men and women from the Framingham Heart Study (n=2148)                          | <i>APOA5</i> , rs662799, rs651821, rs3135506, rs2072560, rs2266788                     | <i>APOA5</i> : 11q23.3   | <b>Mean Intake:</b> 0.69 %kcal omega-3<br><b>Tertiles for omega-3:</b><br><b>Low:</b> <0.58 %kcal<br><b>Moderate:</b> 0.58-0.74 %kcal<br><b>High:</b> >0.74 %kcal<br>(unclear if food and/or supplement sources) | Major allele homozygotes vs. Minor allele carriers | TG                              | --                                                                                                                                                                                                                                                      |
| Lu et al. 2010 (100)         | Cross-Sectional                                                                                                         | Single SNP | Men and women of Doetinchem Cohort Study (n=3575)                               | <i>FADS</i> , rs174546, rs482548, rs174570                                             | <i>FADS</i> : 11q12.2    | Mean intake: 0.5 %kcal (food)                                                                                                                                                                                    | Comparison between three genotypes                 | HDL-c<br>Total-c                | <b>Total -c:</b> In high omega-3 intake group, total-c was significantly higher with each added minor 'C' allele of rs174546                                                                                                                            |
| Nettleton et al. 2009 (101)  | Cross-Sectional                                                                                                         | Single SNP | Men and women of Caucasian ancestry (n=8511)                                    | <i>ANGPTL4</i> E40K (rs116843064)                                                      | <i>ANGPTL4</i> : 19p13.2 | Not Reported/Cannot Determine (food)                                                                                                                                                                             | Minor allele carriers vs. Non-allele carriers      | HDL-c<br>TG                     | --                                                                                                                                                                                                                                                      |
| Richardson et al. 2011 (102) | Meta-analysis of the Framingham Offspring Study (FOS) and the Genetics of Lipid Lowering Drugs and Diet Network (GOLDN) | Single SNP | Men and women from FOS and GOLDN studies (n=3605)                               | <i>PLIN4</i> , rs8887, rs11673616, rs892158, rs7250947, rs8102428, rs1609717, rs884164 | <i>PLIN4</i> : 19p13.3   | Mean intakes:<br><b>FOS Men:</b> 1.43 g/d<br><b>FOS Women:</b> 1.37 g/d<br><b>GOLDN Men:</b> 1.83 g/d<br><b>GOLDN Women:</b> 1.48 g/d (food and supplement)                                                      | Minor allele carriers vs. Non-allele carriers      | TG<br>HDL-c                     | <b>TG:</b> Significant interactions for <i>PLIN4</i> , rs884164 whereby TG levels increased in minor allele carriers with higher omega-3 intake for males and females combined, and males individually.                                                 |
| Standl et al. 2012 (46)      | Cross-Sectional Analysis (10-year time point) within a 10-year longitudinal cohort study                                | Single SNP | 10 year-old children of the GINIplus and LISAplus birth cohort studies (n=1697) | <i>FADS1/FADS2</i> , rs174545, rs174546, rs174556, rs174561, rs174575, rs3834458       | <i>FADS1/2</i> : 11q12.2 | Median intake: 0.14 mg/MJ omega-3 (ALA+EPA+DPA+DHA) (food and supplement)                                                                                                                                        | Comparison between three genotypes                 | HDL-c<br>LDL-c<br>Total-c<br>TG | --                                                                                                                                                                                                                                                      |

|                               |                                                                 |            |                                                                             |                                                                                |                              |                                                                                                                                                                                  |                                                        |                                                        |                                                                                                                                                                                                                                                                                                                                                          |
|-------------------------------|-----------------------------------------------------------------|------------|-----------------------------------------------------------------------------|--------------------------------------------------------------------------------|------------------------------|----------------------------------------------------------------------------------------------------------------------------------------------------------------------------------|--------------------------------------------------------|--------------------------------------------------------|----------------------------------------------------------------------------------------------------------------------------------------------------------------------------------------------------------------------------------------------------------------------------------------------------------------------------------------------------------|
| Tai et al. 2005 (103)         | Cross-Sectional                                                 | Single SNP | Framingham Cohort, men and women (n=2106)                                   | <i>PPARα</i> , L162V (rs1800206)                                               | <i>PPARα</i> : 22q13.31      | <b>High</b> : >0.69 %kcal<br><b>Low</b> : <0.69 %kcal (food)                                                                                                                     | <i>PPARα</i> : 162V carriers vs. 162L/162L homozygotes | TG<br>apoC-III                                         | <b>TG</b> : 167V carriers had lower TG with high omega-3 intake compared to low omega-3 intake (gene-diet-interaction effects were NS)<br><b>apoC-III</b> : Significant gene-diet interactions; Higher apoC-III in 162V carriers with low omega-3 intake compared to 162V carriers with high omega-3 intake and 162L homozygotes with low omega-3 intake |
| Volcik et al. 2008 (104)      | Cross-Sectional (Baseline) Analysis within a Prospective Cohort | Single SNP | African American (n=3480) and Caucasian (n=10 134) men and women (N=13,614) | <i>PPARα</i> , L162V (rs1800206), 3'UTR G>A (rs6008259), 3'UTR C>T (rs3892755) | <i>PPARα</i> : 22q13.31      | African American:<br><b>High</b> : >0.32 g/d EPA+DHA<br><b>Low</b> : ≤0.32 g/d EPA+DHA<br>Caucasian:<br><b>High</b> : >0.22 g/d EPA+DHA<br><b>Low</b> : ≤0.22 g/d EPA+DHA (food) | Comparison between three genotypes for each SNP        | HDL-c<br>LDL-c<br>TG<br>Total-c                        | <b>Total-c, LDL-c</b> : African Americans (but not Caucasians) homozygous for <i>PPARα</i> (rs3892755) TT genotype with high EPA+DHA intake had significantly lower total-c and LDL-c compared to CT and TT genotypes (both high and low EPA+DHA intake)                                                                                                 |
| Warodomwich et al. 2009 (105) | Cross-sectional with fasting and postprandial measures          | Single SNP | Men and women of GOLDN study (n=1083)                                       | <i>TCF7L2</i> rs7903146, rs12255372                                            | <i>TCF7L2</i> : 10q25.2-25.3 | N/A (Median omega-3: 0.67% of kcal) (food)                                                                                                                                       | Major allele homozygotes vs. Minor allele carriers     | HDL-c<br>LDL-c<br>LDL-c particle size<br>TG<br>Total-c | --                                                                                                                                                                                                                                                                                                                                                       |

ALA: alpha-linolenic acid, Apo: apolipoprotein, DHA: docosahexaenoic acid, EPA: eicosapentaenoic acid, HDL: high-density lipoprotein cholesterol, LDL: low-density lipoprotein cholesterol, N/A: not applicable, NS: Non-significant, sdLDL-c: small, dense, low-density lipoprotein cholesterol, SNP: single nucleotide polymorphism, TG: triglycerides

1. Intakes are total omega-3 unless otherwise specified

2. All other (not listed) gene/omega-3/lipid/lipoprotein results of interest to the present review were NS

Participants are described as “healthy” for studies that incorporated exclusion criteria for certain conditions, blood lipid levels, etc. and when studies described the population as “healthy.”

3. These results were taken from the full-text manuscript’s summary table of IL-6 results. Refer to Supplementary Tables S8-S13 in Joffe et al. 2014 (98) for several other significant results, stratified and un-stratified by ethnicity. Note: There were no corrections for multiple testing in the statistical analyses.

'--' indicates that all of the completed gene/omega-3/lipid/lipoprotein analyses were NS

\*Human *APOE* is polymorphic at two single nucleotides (rs429358 and rs7412) resulting in three different alleles (ε2, ε3 and ε4)

Table 2: Summary of interventional studies

| Author, Year              | Study Design                                  | Genetic Approach         | Population (sample size included in analyses)               | Intervention Duration | Gene(s), SNP(s)                                                                                                                                                                                                                                                                                                              | Cytogenic Location of Gene(s)                                                                                                                                                                                                                                                                                                               | Quantity, Source and Type of Omega-3                                                                                                          | Comparators                                                                                                                                                                                                                                 | Plasma Lipid/Lipoprotein Outcome(s)              | Summary of Statistically Significant Study Findings Relevant to the Research Question <sup>1</sup>                                                                                          |
|---------------------------|-----------------------------------------------|--------------------------|-------------------------------------------------------------|-----------------------|------------------------------------------------------------------------------------------------------------------------------------------------------------------------------------------------------------------------------------------------------------------------------------------------------------------------------|---------------------------------------------------------------------------------------------------------------------------------------------------------------------------------------------------------------------------------------------------------------------------------------------------------------------------------------------|-----------------------------------------------------------------------------------------------------------------------------------------------|---------------------------------------------------------------------------------------------------------------------------------------------------------------------------------------------------------------------------------------------|--------------------------------------------------|---------------------------------------------------------------------------------------------------------------------------------------------------------------------------------------------|
| AbuMweis et al. 2018 (70) | Randomized, Crossover Controlled Intervention | Single SNP*              | Adults with at least one cardiovascular risk factor (n=129) | 4 weeks               | <i>FADS1</i> , rs174561<br><i>FADS2</i> , rs174583<br><i>ELOVL2</i> , rs953413<br><i>ELOVL5</i> , rs2397142<br><i>CETP</i> , rs5882<br><i>SCD1</i> , rs2234970,<br><i>PPARα</i> , rs6008259<br><i>LIPF</i> , rs814628<br><br>and<br><i>APOE</i> , rs429358, rs7412                                                           | <i>FADS1/2</i> : 11q12.2<br><i>ELOVL2</i> : 6p24.2<br><i>ELOVL5</i> : 6p12.1<br><i>CETP</i> : 16q13<br><i>SCD1</i> : 10q24.31<br><i>PPARα</i> : 22q13.31<br><i>LIPF</i> : 10q23.31<br><i>APOE</i> : 19q13.32                                                                                                                                | Intake range: 1.0 – 2.5 g/day DHA (supplement)                                                                                                | Comparison between three genotypes for each single SNP (except <i>PPARA</i> and <i>LIPF</i> whereby analyses were major allele homozygotes vs. minor allele carriers)<br><br>and<br><i>APOE</i> -E2 vs. <i>APOE</i> -E3 vs. <i>APOE</i> -E4 | apoA1<br>apoB<br>HDL-c<br>LDL-c<br>TG<br>Total-c | --                                                                                                                                                                                          |
| Alsaleh et al. 2014 (106) | Randomized Controlled Intervention            | Single SNP and Polygenic | Healthy men and women (n=310)                               | 12 months             | <i>CETP</i> , rs3764261,<br><i>LIPC</i> , rs1532085<br><i>APOB</i> , rs1367117<br><i>ABCG5/ABCG8</i> , rs4299376<br><i>TIMD4/HAVCR1</i> , rs6882076<br><i>GCKR</i> , rs1260326<br><i>TRIB1</i> , rs2954029<br><i>ANGPTL3/DOCK7</i> , rs2131925<br><i>FADS1/2/3</i> , rs174546<br><i>GALNT2</i> , rs4846914<br><i>ABCA1</i> , | <i>CETP</i> : 16q13<br><i>LIPC</i> : 15q21.3<br><i>APOB</i> : 2p24.1<br><i>ABCG5/ABCG8</i> : 2p.21<br><i>TIMD4/HAVCR1</i> : 5q33.3<br><i>GCKR</i> : 2p23.3<br><i>TRIB1</i> : 8q24.13<br><i>ANGPTL3/DOCK7</i> : 7: 1p31.3<br><i>FADS</i> : 11q12.2<br><i>GALNT2</i> : 1q42.13<br><i>ABCA1</i> : 9q31.1<br><i>APOE/APOC1/APOC2</i> : 19q13.32 | <b>Low Dose:</b> 0.5 g/day EPA and DHA<br><b>Moderate Dose:</b> 0.9 g/day EPA and DHA<br><b>High Dose:</b> 1.8 g/day EPA and DHA (supplement) | Effect sizes per GRS risk allele after omega-3 treatment<br>and<br>Risk allele carriers vs. non-risk allele carriers                                                                                                                        | HDL-c<br>LDL-c<br>TG<br>Total-c                  | <b>TG:</b> significant interaction whereby 1.8 g/day EPA and DHA significantly reduced TG in T allele carriers (21.6% reduction) vs. CC genotypes (3.5% reduction) of <i>FADS1</i> rs174546 |

1  
2  
3  
4  
5  
6  
7  
8  
9  
10  
11  
12  
13  
14  
15  
16  
17  
18  
19  
20  
21  
22  
23  
24  
25  
26  
27  
28  
29  
30  
31  
32  
33  
34  
35  
36  
37  
38  
39  
40  
41  
42  
43  
44  
45  
46  
47

|                                    |                                                          |                                    |                                                |         |                                                                                                                                                                                                          |                                                                                                                                                                                |                                                                                                                    |                                                                                                                                           |                                                                                                                     |                                                                                                                                                                                                                                                                                                                                                                                                                                                                                                                           |
|------------------------------------|----------------------------------------------------------|------------------------------------|------------------------------------------------|---------|----------------------------------------------------------------------------------------------------------------------------------------------------------------------------------------------------------|--------------------------------------------------------------------------------------------------------------------------------------------------------------------------------|--------------------------------------------------------------------------------------------------------------------|-------------------------------------------------------------------------------------------------------------------------------------------|---------------------------------------------------------------------------------------------------------------------|---------------------------------------------------------------------------------------------------------------------------------------------------------------------------------------------------------------------------------------------------------------------------------------------------------------------------------------------------------------------------------------------------------------------------------------------------------------------------------------------------------------------------|
|                                    |                                                          |                                    |                                                |         | rs4149268<br><i>APOE/APOC1/</i><br><i>APOC2,</i><br>rs439401                                                                                                                                             |                                                                                                                                                                                |                                                                                                                    |                                                                                                                                           |                                                                                                                     |                                                                                                                                                                                                                                                                                                                                                                                                                                                                                                                           |
| Armstrong et al. 2012 (107)        | Double-Blind, Placebo-Controlled Randomized Intervention | Single SNP (deletion polymorphism) | Healthy adults of African ancestry (n=98)      | 6 weeks | <i>ALOX5</i> , dd (33, 34 or 44), d5 (35, 45) and 55 (control) genotypes                                                                                                                                 | <i>ALOX5</i> : 10q11.21                                                                                                                                                        | Fish oil: 5.0 g/day containing 2.0 g/day EPA and 1.0 g/day DHA<br>Control oil: 5.0 g/day corn/soy oil (supplement) | dd vs. d5 vs. 55                                                                                                                          | TG<br>Mean lipoprotein particle diameter, total number of particles and particle concentration for: HDL-c and LDL-c | <b>TG</b> : significant interaction whereby decreases in TG from omega-3 supplementation were specific to d5 genotype group<br><b>HDL-c particle concentration</b> : significant decrease with omega-3 intervention in the d5 and 55 genotype groups compared to placebo, but no decreases in the dd genotype group<br><b>Medium HDL-c particles and HDL-c (mmol/L)</b> : significant gene-treatment interaction but no significant differences after post-hoc analysis for comparisons among genotypes                   |
| Binia et al. 2017 (82)             | Single-Arm Clinical Trial                                | Single SNP                         | Mexican adults 18-40 years (n=191)             | 6 weeks | <i>PPARα</i> , L162V (rs1800206), <i>PPARγ2</i> , P12A (rs1801282)                                                                                                                                       | <i>PPARα</i> : 22q13.31<br><i>PPARγ2</i> : 3p25.2                                                                                                                              | Fish oil: 2.7 g/day containing 1.9 g/d EPA and 0.8 g/day DHA (supplement)                                          | Major allele homozygotes vs. Minor allele carriers                                                                                        | HDL-c<br>LDL-c<br>TG<br>Total-c                                                                                     | <b>LDL-c</b> : significant increase in LDL-c among minor allele carriers ( <i>PPARγ2</i> Pro12Ala and Ala12Ala) only vs. <i>PPARγ2</i> Pro12Pro genotypes only for individuals with BMI>25.0 kg/m <sup>2</sup><br><b>Total-c</b> : significant increase in total-c among minor allele carriers ( <i>PPARγ2</i> Pro12Ala and Ala12Ala) only vs. <i>PPARγ2</i> Pro12Pro genotypes only for individuals with BMI>25.0 kg/m <sup>2</sup>                                                                                      |
| Bouchard Mercier et al. 2013 (108) | Single Arm Clinical Trial                                | Single SNP                         | Healthy adults aged 18-50 years (n=208)        | 6 weeks | <i>SREBF1</i> , rs4925115, rs4925118, rs12953299<br><i>ACLY</i> , rs8071753, rs8065502, rs2304497<br><i>ACACA</i> rs2017571, rs29221368, rs9906044, rs2229416, rs1714987, rs1266175, rs3815059, rs829165 | <i>SREBF1</i> : 17p11.2<br><i>ACLY</i> : 17q21.2<br><i>ACACA</i> : 17q12                                                                                                       | Fish oil: 5.0 g/day containing 1.9-2.2 g/day EPA and 1.1 g/day DHA (supplement)                                    | Major allele homozygotes vs. Minor allele carriers<br>or<br>Comparison between three genotypes (when minor allele frequencies were >0.05) | TG                                                                                                                  | <b>TG</b> : Significant gene-diet interaction whereby individuals with the GG genotype of <i>ACLY</i> rs8071753 and individuals with the GG or CG genotype of <i>ACACA</i> rs1714987 exhibited greater TG lower effects following omega-3 supplementation; these two SNPs explained approximately 8% of the variance in plasma TG responses to omega-3 supplementation. There were significant differences in genotype frequencies of <i>ACLY</i> rs8071753 for responders and non-responders to omega-3 for TG lowering. |
| Bouchard-Mercier et al. 2014 (109) | Single Arm Clinical Trial                                | Single SNP                         | Healthy men and women aged 18-50 years (n=208) | 6 weeks | <i>RXRA</i> (12 SNPs), <i>CPT1A</i> (9 SNPs), <i>ACADVL</i> (1 SNP), <i>ACAA2</i> (6 SNPs), <i>ABCD2</i> (8 SNPs), <i>ACOX1</i> (8 SNPs), <i>ACAA1</i> (3 SNPs) [outlined in Supplementary               | <i>RXRA</i> : 9q34.2<br><i>CPT1A</i> : 11q13.3<br><i>ACADVL</i> : 17p13.1<br><i>ACAA2</i> : 18q21.1<br><i>ABCD2</i> : 12q12<br><i>ACOX1</i> : 17q25.1<br><i>ACAA1</i> : 3p22.2 | Fish oil: 5.0 g/day containing 1.9-2.2 g/day EPA and 1.1 g/day DHA (supplement)                                    | Major allele homozygotes vs. Minor allele carriers<br>or<br>Comparison between three genotypes (when minor allele frequencies were >0.05) | TG                                                                                                                  | <b>TG</b> : There were significant gene-diet interaction effects on TG responses to omega-3 for <i>RXRA</i> rs11185660 genotype dependent on total fat intake, <i>RXRA</i> rs10881576, rs12339187 and rs11185660 genotypes dependent on saturated fat intake, and <i>ACOX1</i> rs17583163 dependent on total polyunsaturated fat intake                                                                                                                                                                                   |

1  
2  
3  
4

| Table 2]                           |                                                                      |             |                                                           |                  |                                                                        |                         |                                                                                                                                                                                                                                                                                                             |                                                                                                                                     |                                                                        |                                                                                                                                                                                                                                                                                                                                               |
|------------------------------------|----------------------------------------------------------------------|-------------|-----------------------------------------------------------|------------------|------------------------------------------------------------------------|-------------------------|-------------------------------------------------------------------------------------------------------------------------------------------------------------------------------------------------------------------------------------------------------------------------------------------------------------|-------------------------------------------------------------------------------------------------------------------------------------|------------------------------------------------------------------------|-----------------------------------------------------------------------------------------------------------------------------------------------------------------------------------------------------------------------------------------------------------------------------------------------------------------------------------------------|
| 5                                  | 6                                                                    | 7           | 8                                                         | 9                | 10                                                                     | 11                      | 12                                                                                                                                                                                                                                                                                                          | 13                                                                                                                                  | 14                                                                     | 15                                                                                                                                                                                                                                                                                                                                            |
| Bouchard-Mercier et al. 2014 (110) | Single Arm Clinical Trial                                            | Single SNP  | Healthy men and women aged 18-50 years (n=208)            | 6 weeks          | <i>GCK</i> (13 SNPs) [outlined in Supplementary Table 3]               | <i>GCK</i> : 7p13       | Fish oil: 5.0 g/day containing 1.9-2.2 g/day EPA and 1.1 g/day DHA (supplement)                                                                                                                                                                                                                             | Major allele homozygotes vs. Minor allele carriers or Comparison between three genotypes (when minor allele frequencies were >0.05) | TG                                                                     | TG: CC genotypes of <i>GCK</i> rs741038 exhibited significantly greater TG reduction in response to omega-3 when their carbohydrate intake was high (>48.6%kcal) compared to those with the CC genotype of rs741038 with low carbohydrate intake (≤48.6%kcal) and compared to CT or TT genotypes with either high or low carbohydrate intake. |
| 13                                 | 14                                                                   | 15          | 16                                                        | 17               | 18                                                                     | 19                      | 20                                                                                                                                                                                                                                                                                                          | 21                                                                                                                                  | 22                                                                     | 23                                                                                                                                                                                                                                                                                                                                            |
| Caron-Dorval et al. 2008 (111)     | Single Arm Clinical Trial                                            | Single SNP  | Healthy men of Caucasian ancestry aged 18-55 years (n=28) | 6 weeks          | <i>PPARA</i> , L162V (rs1800206)                                       | <i>PPARA</i> : 22q13.31 | Fish oil: 5.0 g/day containing 1.9 g/day EPA and 1.1 g/day DHA (supplement)                                                                                                                                                                                                                                 | V162 carriers vs. non-carriers                                                                                                      | apoB-100<br>HDL-c<br>LDL-c<br>TG<br>Total-c<br>Total-C:HDL-c           | --                                                                                                                                                                                                                                                                                                                                            |
| 21                                 | 22                                                                   | 23          | 24                                                        | 25               | 26                                                                     | 27                      | 28                                                                                                                                                                                                                                                                                                          | 29                                                                                                                                  | 30                                                                     | 31                                                                                                                                                                                                                                                                                                                                            |
| Carvalho-Wells et al. 2012 (112)   | Sequential Non-Randomized, Cross-Over Dietary Intervention           | Single SNP* | Healthy men and women aged 35-70 years (n=88)             | 8 weeks per diet | <i>APOE</i> , rs429358, rs7412                                         | <i>APOE</i> : 19q13.32  | <b>Low-Fat:</b><br>4.0 mg/day EPA, 10.6 mg/d DPA, 11.7 mg/d DHA<br><b>High-SFA:</b><br>20.2 mg/d EPA, 27.1 mg/d DPA, 15.4 mg/d DHA<br><b>High-SFA+DHA:</b><br>524.3 mg/d EPA, 215.5 mg/d DPA, 3017.3 mg/d DHA [actual intakes reported (113)] (supplemental DHA for High-SFA+DHA; others from food sources) | <i>APOE</i> -E3/3 vs. <i>APOE</i> -E3/4                                                                                             | apoB<br>apoC-III<br>apoE<br>HDL-c<br>LDL-c<br>sdLDL-c<br>TG<br>Total-c | TG: Significant diet x genotype interaction for TG; greater TG lowering response to high-SFA+DHA diet in <i>APOE</i> -E3/4 carriers (compared to high-SFA diet alone)                                                                                                                                                                         |
| 30                                 | 31                                                                   | 32          | 33                                                        | 34               | 35                                                                     | 36                      | 37                                                                                                                                                                                                                                                                                                          | 38                                                                                                                                  | 39                                                                     | 40                                                                                                                                                                                                                                                                                                                                            |
| Caslake et al. 2008 (114)          | Double-Blind, Randomized, Placebo-Controlled, Crossover Intervention | Single SNP* | Healthy men and women aged 20-70 years (n=312)            | 8 weeks per diet | <i>APOE</i> , rs429358, rs7412                                         | <i>APOE</i> : 19q13.32  | Control oil: 0.0 g/d EPA and DHA<br>Fish oil: 0.7 g/d EPA and DHA<br>Fish oil: 1.8 g/d EPA and DHA (supplement)                                                                                                                                                                                             | <i>APOE</i> -E2/E2 + E2/E3 vs. <i>APOE</i> -E3/E3 vs. <i>APOE</i> -E3/E4 + E4/E4                                                    | HDL-c<br>LDL-c<br>TG<br>Total-c                                        | TG: Significant interaction between treatment x sex x genotype whereby <i>APOE</i> -E3/E4 + E4/E4 males exhibited the greatest TG reductions with both 0.7 g/d EPA and DHA as well as 1.8 g/d EPA and DHA compared to other genotypes                                                                                                         |
| 34                                 | 35                                                                   | 36          | 37                                                        | 38               | 39                                                                     | 40                      | 41                                                                                                                                                                                                                                                                                                          | 42                                                                                                                                  | 43                                                                     | 44                                                                                                                                                                                                                                                                                                                                            |
| Cormier et al. 2012 (115)          | Single Arm Clinical Trial                                            | Single SNP  | Healthy men and women aged 18-50 years (n=208)            | 6 weeks          | <i>FADS</i> gene cluster (19 SNPs) [outlined in Supplementary Table 3] | <i>FADS</i> : 11q12.2   | Fish oil: 5.0 g/day containing 1.9 g/day EPA and 1.1 g/day DHA (supplement)                                                                                                                                                                                                                                 | Major allele homozygotes vs. Minor allele carriers                                                                                  | TG                                                                     | --                                                                                                                                                                                                                                                                                                                                            |
| 37                                 | 38                                                                   | 39          | 40                                                        | 41               | 42                                                                     | 43                      | 44                                                                                                                                                                                                                                                                                                          | 45                                                                                                                                  | 46                                                                     | 47                                                                                                                                                                                                                                                                                                                                            |
| Dang et al. 2015 (73)              | Single Arm Clinical Trial                                            | Single SNP* | Healthy men and women aged 20-35 years (n=80)             | 4 weeks          | <i>APOE</i> , rs429358, rs7412                                         | <i>APOE</i> : 19q13.32  | Fish oil containing 900 mg EPA and 680 mg DHA (supplement)                                                                                                                                                                                                                                                  | <i>APOE</i> -E4+ vs. <i>APOE</i> -E4-                                                                                               | HDL-c<br>LDL-c<br>TG<br>Total-c                                        | --                                                                                                                                                                                                                                                                                                                                            |
| 40                                 | 41                                                                   | 42          | 43                                                        | 44               | 45                                                                     | 46                      | 47                                                                                                                                                                                                                                                                                                          | 48                                                                                                                                  | 49                                                                     | 50                                                                                                                                                                                                                                                                                                                                            |
| Dawczynski et                      | Randomized,                                                          | Single SNP  | Men and                                                   | 10 weeks         | <i>CD36</i> ,                                                          | <i>CD36</i> : 7q21.11   | Yogurt with lower                                                                                                                                                                                                                                                                                           | Comparison between                                                                                                                  | HDL-c                                                                  | HDL-c: In response to omega-3 supplementation (0.8-3.0                                                                                                                                                                                                                                                                                        |

41  
42  
43  
44  
45  
46  
47

1  
2  
3  
4  
5  
6  
7  
8  
9  
10  
11  
12  
13  
14  
15  
16  
17  
18  
19  
20  
21  
22  
23  
24  
25  
26  
27  
28  
29  
30  
31  
32  
33  
34  
35  
36  
37  
38  
39  
40  
41  
42  
43  
44  
45  
46  
47

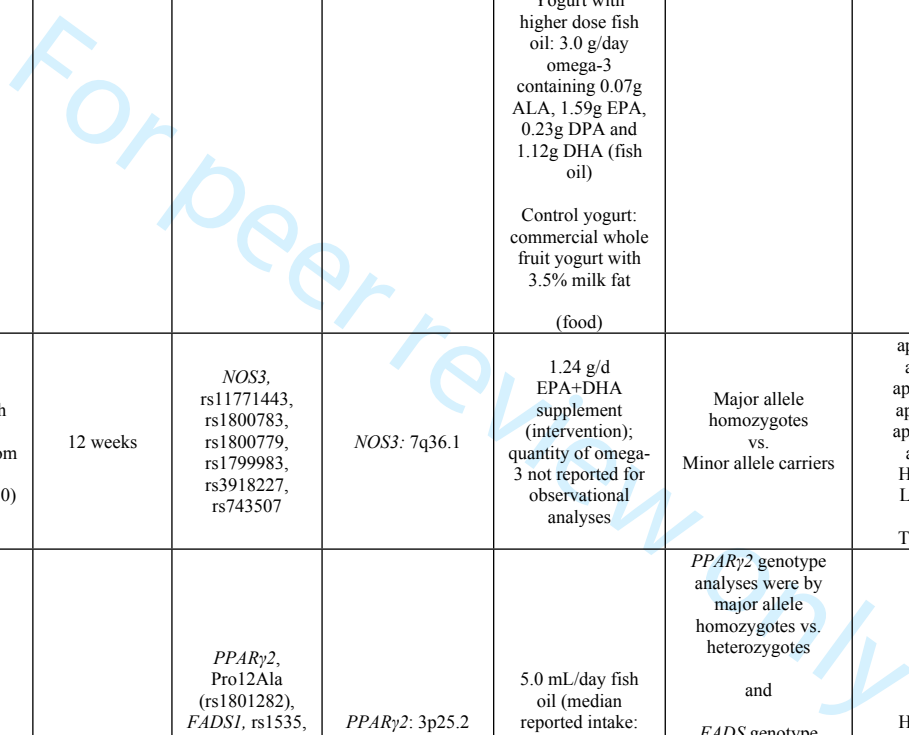

|                            |                                                                 |                              |                                                                   |          |                                                                                                                                                                |                                                                                           |                                                                                                                                                                                                                                                                                                                          |                                                                                                                                                                                                                                                                                |                                                                                             |                                                                                                                                                                                                                                                                                                                                                                        |
|----------------------------|-----------------------------------------------------------------|------------------------------|-------------------------------------------------------------------|----------|----------------------------------------------------------------------------------------------------------------------------------------------------------------|-------------------------------------------------------------------------------------------|--------------------------------------------------------------------------------------------------------------------------------------------------------------------------------------------------------------------------------------------------------------------------------------------------------------------------|--------------------------------------------------------------------------------------------------------------------------------------------------------------------------------------------------------------------------------------------------------------------------------|---------------------------------------------------------------------------------------------|------------------------------------------------------------------------------------------------------------------------------------------------------------------------------------------------------------------------------------------------------------------------------------------------------------------------------------------------------------------------|
| al. 2013 (81)              | Placebo-Controlled, Double-Blind Intervention                   |                              | women with TG $\geq$ 1.7 mmol/L, otherwise healthy (n=47)         |          | rs1761667, rs1049673                                                                                                                                           |                                                                                           | <p>dose fish oil: 0.8g/day omega-3 containing 0.01g ALA, 0.44g EPA, 0.06g DPA and 0.31g DHA (fish oil)</p> <p>Yogurt with higher dose fish oil: 3.0 g/day omega-3 containing 0.07g ALA, 1.59g EPA, 0.23g DPA and 1.12g DHA (fish oil)</p> <p>Control yogurt: commercial whole fruit yogurt with 3.5% milk fat (food)</p> | three genotypes                                                                                                                                                                                                                                                                | TG                                                                                          | g/day), HDL-c increased in GA genotype of <i>CD36</i> rs1761667 and CG genotype of <i>CD36</i> rs1049673.<br><b>TG:</b> In response to omega-3 supplementation (0.8-3.0 g/day), TG decreased in GA genotype of <i>CD36</i> rs1761667.                                                                                                                                  |
| Ferguson et al. 2010 (116) | Randomized Intervention and Cross-Sectional (Baseline) Analysis | Single SNP                   | Men and women with metabolic syndrome from LIPGENE cohort (n=450) | 12 weeks | NOS3, rs11771443, rs1800783, rs1800779, rs1799983, rs3918227, rs743507                                                                                         | NOS3: 7q36.1                                                                              | 1.24 g/d EPA+DHA supplement (intervention); quantity of omega-3 not reported for observational analyses                                                                                                                                                                                                                  | Major allele homozygotes vs. Minor allele carriers                                                                                                                                                                                                                             | apoA-1<br>apoB<br>apoB-48<br>apoC-II<br>apoC-III<br>apoE<br>HDL-c<br>LDL-c<br>TG<br>Total-c | <b>TG:</b> For <i>NOS3</i> rs1799983 minor-allele (A) carriers only, the observational analysis indicated higher TG with lower EPA+DHA intake (and lower TG with higher EPA+DHA intake). Post-intervention with omega-3 supplementation indicated that only minor-allele (A) carriers exhibited significant TG reduction (accompanied by increases in plasma omega-3). |
| Harsløf et al. 2014 (61)   | Randomized, Controlled Intervention                             | Single SNP and Genetic Score | Infants of Danish ancestry (n=133)                                | 9 months | <i>PPAR<math>\gamma</math>2</i> , Pro12Ala (rs1801282), <i>FADS1</i> , rs1535, <i>FADS2</i> , rs174575, <i>FADS3</i> , rs174448 <i>COX2</i> , rs5275, rs689466 | <i>PPAR<math>\gamma</math>2</i> : 3p25.2 <i>FADS</i> : 11q12.2 <i>COX2</i> : 1q25.2-q25.3 | 5.0 mL/day fish oil (median reported intake: 3.8 g/day containing 630 mg/day EPA and 620 mg/day DHA) (supplement)                                                                                                                                                                                                        | <i>PPAR<math>\gamma</math>2</i> genotype analyses were by major allele homozygotes vs. heterozygotes<br><br>and<br><i>FADS</i> genotype analyses were by the number of DHA-increasing alleles<br><br>and<br><i>COX2</i> genotype analyses were by major allele homozygotes vs. | HDL-c<br>LDL-c<br>TG<br>Total-c                                                             | <b>TG:</b> <i>PPAR<math>\gamma</math>2</i> heterozygotes exhibited reduced TG in response to omega-3 when compared to <i>PPAR<math>\gamma</math>2</i> heterozygotes in the control (sunflower oil) group                                                                                                                                                               |



|    |                           |                                     |             |                                                                                               |                                  |                                                          |                                |                                                                                                                             |                                                     |                                           |                                                                                                                                                                                                                                                                                                                                                                                                                                                                                                                                                                                                                                                                                                                                                                                               |
|----|---------------------------|-------------------------------------|-------------|-----------------------------------------------------------------------------------------------|----------------------------------|----------------------------------------------------------|--------------------------------|-----------------------------------------------------------------------------------------------------------------------------|-----------------------------------------------------|-------------------------------------------|-----------------------------------------------------------------------------------------------------------------------------------------------------------------------------------------------------------------------------------------------------------------------------------------------------------------------------------------------------------------------------------------------------------------------------------------------------------------------------------------------------------------------------------------------------------------------------------------------------------------------------------------------------------------------------------------------------------------------------------------------------------------------------------------------|
| 1  |                           |                                     |             |                                                                                               |                                  |                                                          |                                | heterozygotes vs. minor allele homozygotes                                                                                  |                                                     |                                           |                                                                                                                                                                                                                                                                                                                                                                                                                                                                                                                                                                                                                                                                                                                                                                                               |
| 2  |                           |                                     |             |                                                                                               |                                  |                                                          |                                |                                                                                                                             |                                                     |                                           |                                                                                                                                                                                                                                                                                                                                                                                                                                                                                                                                                                                                                                                                                                                                                                                               |
| 3  |                           |                                     |             |                                                                                               |                                  |                                                          |                                |                                                                                                                             |                                                     |                                           |                                                                                                                                                                                                                                                                                                                                                                                                                                                                                                                                                                                                                                                                                                                                                                                               |
| 4  |                           |                                     |             |                                                                                               |                                  |                                                          |                                |                                                                                                                             |                                                     |                                           |                                                                                                                                                                                                                                                                                                                                                                                                                                                                                                                                                                                                                                                                                                                                                                                               |
| 5  |                           |                                     |             |                                                                                               |                                  |                                                          |                                |                                                                                                                             |                                                     |                                           |                                                                                                                                                                                                                                                                                                                                                                                                                                                                                                                                                                                                                                                                                                                                                                                               |
| 6  |                           |                                     |             |                                                                                               |                                  |                                                          |                                |                                                                                                                             |                                                     |                                           |                                                                                                                                                                                                                                                                                                                                                                                                                                                                                                                                                                                                                                                                                                                                                                                               |
| 7  | Itariu et al. 2012 (83)   | Randomized, Controlled Intervention | Single SNP  | Men and women without diabetes with a BMI $\geq$ 40 kg/m <sup>2</sup> aged 20-65 years (n=55) | 8 weeks                          | <i>PPAR</i> $\gamma$ 2, Pro12Ala (rs1801282)             | <i>PPAR</i> $\gamma$ 2: 3p25.2 | Fish oil containing 3.4 g/day EPA + DHA (supplement)                                                                        | <i>PPAR</i> $\gamma$ 2, Ala12 carriers vs. Pro12Pro | apoB HDL-c LDL-c TG Total-c               | <b>apoB:</b> Significant increases in apoB with omega-3 intervention in Ala12 carriers when compared to Pro12 carriers.<br><b>Total-c:</b> Significant interaction effect whereby increases in total-c were exhibited with omega-3 intervention in Ala12 carriers when compared to the Pro12Pro genotype.                                                                                                                                                                                                                                                                                                                                                                                                                                                                                     |
| 8  | Jackson et al. 2012 (74)  | Non-Randomized Intervention         | Single SNP* | Healthy men aged 35-70 years (n=23)                                                           | 8 weeks and 480-min postprandial | <i>APOE</i> , rs429358, rs7412                           | <i>APOE</i> : 19q13.32         | Fish oil containing 3.45 g/day DHA (supplement)                                                                             | <i>APOE</i> -E3/3 vs. <i>APOE</i> -E3/4             | apoB apoC-III apoE HDL-c LDL-c TG Total-c | <b>TG:</b> <i>APOE</i> -E3/E4 exhibited reduced fasting TG in response to a high saturated fat + DHA intervention when compared to the high saturated fat diet alone. There was also a significant interaction (meal x time x genotype) for the postprandial TG lowering response whereby <i>APOE</i> -E3/4 consuming a high saturated fat + DHA intervention exhibited significantly lower postprandial TG, TG area under the curve, and TG maximum concentration compared to those consuming the high saturated fat diet alone.                                                                                                                                                                                                                                                             |
| 9  | Jackson et al. 2017 (117) | Non-Randomized Intervention         | Single SNP* | Healthy men aged 35-70 years (n=23)                                                           | 480-min postprandial             | <i>APOE</i> , rs429358, rs7412                           | <i>APOE</i> : 19q13.32         | Fish oil containing 3.45 g/day DHA (supplement)                                                                             | <i>APOE</i> -E3/3 vs. <i>APOE</i> -E3/4             | apoB-48 apoB-100                          | --                                                                                                                                                                                                                                                                                                                                                                                                                                                                                                                                                                                                                                                                                                                                                                                            |
| 10 | Lindi et al. 2003 (84)    | Randomized Intervention             | Single SNP  | Healthy men and women aged 30-65 years (n=150)                                                | 3 months                         | <i>PPAR</i> $\gamma$ 2, Pro12Ala (rs1801282)             | <i>PPAR</i> $\gamma$ 2: 3p25.2 | Fish oil containing 2.4 g/d EPA + DHA (supplement)                                                                          | <i>PPAR</i> $\gamma$ 2, Ala12 carriers vs. Pro12Pro | HDL-c LDL-c TG Total-c                    | <b>TG:</b> Compared to Pro12Pro, Ala12 carriers exhibited significantly greater TG reductions in response to omega-3 supplementation only when total fat intake was $\leq$ 37 %kcal or SFA intake was $\leq$ 10 %kcal                                                                                                                                                                                                                                                                                                                                                                                                                                                                                                                                                                         |
| 11 | Lindman et al. (118)      | Randomized, Controlled Intervention | Single SNP  | Men at high risk of cardiovascular disease aged 65-75 years (n=204)                           | 6 months                         | <i>FVII</i> , rs6046                                     | <i>FVII</i> : 13q34            | Fish oil containing 2.4 g/d EPA + DHA<br>Dietary advice including recommendations to increase omega-3 (supplement and food) | Major allele homozygotes vs. Minor allele carriers  | TG                                        | --                                                                                                                                                                                                                                                                                                                                                                                                                                                                                                                                                                                                                                                                                                                                                                                            |
| 12 | Madden et al. 2008 (80)   | Non-Randomized Intervention         | Single SNP  | Healthy men aged 43-84 years (n=111)                                                          | 12 weeks                         | <i>CD36</i> , rs1527483, rs1049673, rs1761667, rs1984112 | <i>CD36</i> : 7q21.11          | Fish oil containing 1.02 g/d EPA and 0.69 g/d DHA (supplement)                                                              | For each SNP: AA vs. AG vs. GG                      | HDL-c LDL-c LDL-c:HDL-c TG                | <b>TG:</b> In response to omega-3 supplementation, TG significantly reduced only in individuals with the GG genotype, for each SNP individually (i.e. for rs1527483, rs1049673, rs1761667 and rs1984112 individually)<br><b>LDL-c:</b> In response to omega-3 supplementation, LDL-c increased only in individuals with the rs1761667 AA genotype as well as for individuals with the rs1984112 AA genotype<br><b>HDL-c:</b> In response to omega-3 supplementation, HDL-c significantly increased in individuals with rs1761667 AA or AG as well as for individuals with the CC or CG genotype for either rs1984112, rs1527483 and/or rs1049673; NOTE: rs1527483 results should be interpreted with caution due to low sample sizes for AA and AG genotypes thus reducing statistical power) |
| 13 | Markovic et               | Single-Arm                          | Single SNP  | Healthy men                                                                                   | 12 weeks                         | <i>TNFA</i> , -308                                       | <i>TNFA</i> : 6p21.33          | Fish oil containing                                                                                                         | Major allele                                        | TG                                        | <b>TG:</b> Significant negative correlation between pre-                                                                                                                                                                                                                                                                                                                                                                                                                                                                                                                                                                                                                                                                                                                                      |

1  
2  
3  
4  
5  
6  
7  
8  
9  
10  
11  
12  
13  
14  
15  
16  
17  
18  
19  
20  
21  
22  
23  
24  
25  
26  
27  
28  
29  
30  
31  
32  
33  
34  
35  
36  
37  
38  
39  
40  
41  
42  
43  
44  
45  
46  
47

|                                     |                                                                                      |             |                                                                                                    |                                                          |                                                                                                                                    |                                                                          |                                                                                                                                                                                                             |                                                                                                                                                    |                                                                      |                                                                                                                                                                                                                                                                                                                                                                                                                                                                                                                     |
|-------------------------------------|--------------------------------------------------------------------------------------|-------------|----------------------------------------------------------------------------------------------------|----------------------------------------------------------|------------------------------------------------------------------------------------------------------------------------------------|--------------------------------------------------------------------------|-------------------------------------------------------------------------------------------------------------------------------------------------------------------------------------------------------------|----------------------------------------------------------------------------------------------------------------------------------------------------|----------------------------------------------------------------------|---------------------------------------------------------------------------------------------------------------------------------------------------------------------------------------------------------------------------------------------------------------------------------------------------------------------------------------------------------------------------------------------------------------------------------------------------------------------------------------------------------------------|
| al. 2004 (119)                      | Clinical Trial                                                                       |             | (n=159)                                                                                            |                                                          | (rs1800629)<br><i>LT-α</i> , +252<br>(rs909253)<br><i>IL-1β</i> , -511<br>(rs16944)<br><i>IL-6</i> , -174<br>(rs1800795)           | <i>LT-α</i> : 6p21.33<br><i>IL-1β</i> : 2q14.1<br><i>IL-6</i> : 7p15.3   | 1.8 g/d<br>EPA+DHA<br>(supplement)                                                                                                                                                                          | homozygotes<br>vs.<br>Minor allele carriers<br>or<br>Comparison between<br>three genotypes<br>(depending on allele<br>frequencies)                 |                                                                      | supplementation TG and change of TG during omega-3<br>supplementation for all genotypes of genes studied except for<br><i>LT-α</i> rs909253 GG genotype and <i>IL-1β</i> rs16944 TT genotype.<br>In <i>LT-α</i> rs909253 AA genotype and <i>TNFα</i> rs1800629 AA<br>genotype, significant association between BMI (divided in<br>tertiles) and TG changes.                                                                                                                                                         |
| McColley et<br>al. 2011 (120)       | Crossover<br>Intervention                                                            | Single SNP  | Healthy post-<br>menopausal<br>women (n=16)                                                        | 8 weeks per<br>diet                                      | <i>FABP2</i> ,<br>rs1799883                                                                                                        | <i>FABP2</i> : 4q26                                                      | <b>High-Fat:</b> 50<br>%kcal from<br>dietary fat<br><b>Low-Fat:</b> 20<br>%kcal from<br>dietary fat<br><b>Low-Fat +<br/>omega-3:</b> 23%<br>kcal from dietary<br>fat with 3 %kcal<br>from omega-3<br>(food) | Major allele<br>homozygotes<br>vs.<br>Minor allele carriers                                                                                        | TG                                                                   | --                                                                                                                                                                                                                                                                                                                                                                                                                                                                                                                  |
| Minihane et al.<br>2000 (121)       | Double-Blind,<br>Randomized,<br>Placebo-<br>Controlled,<br>Crossover<br>Intervention | Single SNP* | Healthy men<br>aged 30-70<br>years at risk of<br>atherogenic<br>lipoprotein<br>phenotype<br>(n=50) | 6 weeks per<br>diet<br>and<br>480 minute<br>postprandial | <i>APOE</i> ,<br>rs429358,<br>rs7412                                                                                               | <i>APOE</i> : 19q13.32                                                   | Fish oil containing<br>3.0 g/d EPA and<br>DHA,<br>Control oil: 6.0<br>g/d olive oil<br>capsule<br>(supplement)                                                                                              | <i>APOE</i> -E2/E3<br>vs.<br><i>APOE</i> -E3/E3<br>vs.<br><i>APOE</i> -E3/E4 +<br>E4/E4                                                            | HDL-c<br>LDL-c<br>TG<br>Total-c<br>Total-c:HDL                       | <b>TG:</b> Postprandial: Significantly greater reduction in TG<br>incremental area under postprandial TG curve in <i>APOE</i> -E2/E3<br>relative to other <i>APOE</i> genotype categories<br><b>Total-c:</b> 6-week: <i>APOE</i> -E3/E4 + E4/E4 genotype group<br>exhibited significantly different changes in total-c (increase),<br>relative to other <i>APOE</i> genotypes, whereby reductions in<br>total-c occurred                                                                                            |
| Olano-Martin<br>et al. 2010<br>(77) | Randomized,<br>Cross-Over<br>Intervention                                            | Single SNP* | Healthy<br>normolipidemi<br>c men<br>(n=38)                                                        | 4 weeks per<br>diet                                      | <i>APOE</i> ,<br>rs429358,<br>rs7412                                                                                               | <i>APOE</i> : 19q13.32                                                   | EPA-rich fish oil:<br>3.3 g/d EPA<br>DHA-rich fish oil:<br>3.7 g/d DHA<br>Control oil: 80:20<br>palm<br>olein:soyabean<br>(supplement)                                                                      | <i>APOE</i> -E3/3<br>vs.<br><i>APOE</i> -E3/4<br>(carriers)                                                                                        | apoB<br>apoE<br>HDL-c<br>LDL-c<br>LDL-c<br>TG<br>TG:HDL-c<br>Total-c | <b>apoB, LDL-c:</b> In <i>APOE</i> -E4 carriers only, DHA-rich oil<br>treatment resulted in significant increases in apoB and LDL-c<br><b>TG:</b> Significant reduction in TG in response to both EPA and<br>DHA in <i>APOE</i> -E3/E3 group; significant reduction in TG in<br><i>APOE</i> -E4 carriers with EPA only. No significant interactions.<br><b>Total-c:</b> Significant genotype x treatment interaction whereby<br><i>APOE</i> -E4 carriers exhibit total-c reductions in response to<br>EPA-rich oil. |
| Quellette et al.<br>2013 (122)      | Single-Arm<br>Clinical Trial                                                         | Single SNP  | Healthy men<br>and women<br>aged 18-50<br>(n=210)                                                  | 6 weeks                                                  | <i>GPAM</i> (3<br>SNPs),<br><i>AGPAT3</i> (13<br>SNPs),<br><i>AGPAT4</i> (35<br>SNPs) [outlined<br>in<br>Supplementary<br>Table 3] | <i>GPAM</i> : 10q25.2<br><i>AGPAT3</i> : 21q22.3<br><i>AGPAT4</i> : 6q26 | Fish oil containing<br>1.9-2.2 g/d EPA +<br>1.1 g/d DHA<br>(supplement)                                                                                                                                     | Major allele<br>homozygotes<br>vs.<br>Minor allele carriers<br>or<br>Comparison between<br>three genotypes<br>(depending on allele<br>frequencies) | HDL-c<br>LDL-c<br>TG<br>Total-c                                      | <b>LDL-c:</b> Significant <i>GPAM</i> , rs2792751 genotype x<br>supplementation interaction on LDL-c<br><b>TG:</b> Significant genotype x supplementation interaction on<br>TG for <i>GPAM</i> , rs2792751 and rs17129561 as well as<br><i>AGPAT4</i> , rs9458172 and rs3798943                                                                                                                                                                                                                                     |
| Quellette et al.<br>2014 (123)      | Single-Arm<br>Clinical Trial                                                         | Single SNP  | Healthy men<br>and women 18-<br>50 years<br>(n=208)                                                | 6 weeks                                                  | <i>MGLL</i> (18<br>SNPs) [outlined<br>in<br>Supplementary<br>Table 3]                                                              | <i>MGLL</i> : 3q21.3                                                     | Fish oil containing<br>1.9-2.2 g/d EPA +<br>1.1 g/d DHA<br>(supplement)                                                                                                                                     | Major allele<br>homozygotes<br>vs.<br>Minor allele carriers<br>or<br>Comparison between<br>three genotypes<br>(depending on allele                 | apoB<br>HDL-c<br>LDL-c<br>LDL particle<br>size<br>TG<br>Total-c      | <b>LDL-c:</b> Significant interactions for <i>MGLL</i> rs6776142,<br>rs555183, rs782444, rs6787155 and rs1466571 whereby<br>omega-3 supplementation modulated LDL-c levels; rs782444<br>and rs555183 minor allele homozygotes more likely to be<br>negative responders to omega-3 supplementation (i.e. exhibit<br>reduced LDL-c); rs6780384, rs782444 and rs6787155 major<br>allele homozygotes more likely to be negative responders to<br>omega-3 supplementation                                                |

1  
2  
3  
4  
5  
6  
7  
8  
9  
10  
11  
12  
13  
14  
15  
16  
17  
18  
19  
20  
21  
22  
23  
24  
25  
26  
27  
28  
29  
30  
31  
32  
33  
34  
35  
36  
37  
38  
39  
40  
41  
42  
43  
44  
45  
46  
47

|                             |                           |                   |                                                   |                            |                                                                                                      |                              |                                                                |                                                                      |                                                     |                                                                                                                                                                                                                                                                                                                                                                                                                                                                                                                                                                                                              |
|-----------------------------|---------------------------|-------------------|---------------------------------------------------|----------------------------|------------------------------------------------------------------------------------------------------|------------------------------|----------------------------------------------------------------|----------------------------------------------------------------------|-----------------------------------------------------|--------------------------------------------------------------------------------------------------------------------------------------------------------------------------------------------------------------------------------------------------------------------------------------------------------------------------------------------------------------------------------------------------------------------------------------------------------------------------------------------------------------------------------------------------------------------------------------------------------------|
|                             |                           |                   |                                                   |                            |                                                                                                      |                              |                                                                | frequencies)                                                         |                                                     | <b>LDL particle size:</b> Significant interactions for <i>MGLL</i> rs782440, rs13076543 and rs9877819 whereby omega-3 supplementation modulated LDL particle size; rs549662 minor allele homozygotes more likely to be positive responders to omega-3 supplementation (i.e. exhibit increased LDL particle size)                                                                                                                                                                                                                                                                                             |
| Paschos et al. 2005 (78)    | Single-Arm Clinical Trial | Single SNP*       | Men with dyslipidemia, aged 35 to 67 years (n=50) | 12 weeks                   | <i>APOE</i> , rs429358, rs7412                                                                       | <i>APOE</i> : 19q13.32       | 8.1 g/day ALA (via 15 ml of Flaxseed oil supplementation)      | <i>APOE</i> -E2/E3 vs. <i>APOE</i> -E3/E3 vs. <i>APOE</i> -E3/E4     | ApoA-I<br>ApoB<br>HDL-c<br>LDL-c<br>TG<br>Total-c   | <b>ApoA-I:</b> Significant decrease in E3/E3<br><b>HDL-c:</b> Significant decrease in E3/E3                                                                                                                                                                                                                                                                                                                                                                                                                                                                                                                  |
| Pishva et al. 2010 (124)    | Single-Arm Clinical Trial | Single SNP        | Adults with hypertriglyceridemia (n=46)           | 8 weeks                    | <i>FABP2</i> , Ala54Thr (rs1799883)                                                                  | <i>FABP2</i> : 4q26          | 2.0 g/day pure EPA (supplement)                                | Ala54Ala (GG) vs. Thr54 carriers (GT+TT)                             | ApoB<br>ApoC-III<br>HDL-c<br>LDL-c<br>TG<br>Total-c | <b>ApoC-III:</b> In response to EPA supplementation, significantly greater reductions in ApoC-III in GT+TT genotypes of rs1799883 compared to GG genotype.<br><b>HDL-c:</b> In response to EPA supplementation, significantly greater increases in HDL-c in GT+TT genotypes of rs1799883 compared to GG genotype.<br><b>LDL-c:</b> In response to EPA supplementation, LDL-c significantly decreased in GG genotypes of rs1799883 but not GT+TT genotypes.<br><b>TG:</b> In response to EPA supplementation, significantly greater reductions in TG in GT+TT genotypes of rs1799883 compared to GG genotype. |
| Pishva et al. 2014 (125)    | Single-Arm Clinical Trial | Single SNP        | Adults with hypertriglyceridemia (n=46)           | 8 weeks                    | <i>PPARα</i> , Leu162Val (rs1800206)<br><i>PPARα</i> , Intron 7 SNP                                  | <i>PPARα</i> : 22q13.31      | 2.0 g/day pure EPA (supplement)                                | Leu162 vs. Val162 carriers<br><br>and<br>Intron 7 GG vs. Intron 7 GC | ApoB<br>ApoCIII<br>HDL-c<br>LDL-c<br>TG<br>Total-c  | --                                                                                                                                                                                                                                                                                                                                                                                                                                                                                                                                                                                                           |
| Roke and Mutch, 2014 (68)   | Single-Arm Clinical Trial | Single SNP        | Men aged 18-25 years (n=12)                       | 12 weeks (+8 week washout) | <i>FADS1</i> , rs174537<br><i>FADS2</i> , rs174576 (LD=1.0 therefore presented results for rs174537) | <i>FADS1/2</i> : 11q12.2     | Fish oil containing 1.8 g/d EPA+DHA (supplement)               | Major allele homozygotes vs. Minor allele carriers                   | HDL-c<br>LDL-c<br>TG<br>Total-c<br>Total-c:HDL-c    | --                                                                                                                                                                                                                                                                                                                                                                                                                                                                                                                                                                                                           |
| Rudkowska et al. 2014 (126) | Single-Arm Clinical Trial | Single SNP        | Healthy men and women aged 18-50 (n=210)          | 6 weeks                    | <i>SCD1</i> , rs1502593, rs522951, rs11190480, rs3071, rs3829160, rs2234970, rs10883463, rs508384    | <i>SCD1</i> : 10q24.31       | Fish oil containing 1.9-2.2 g/d EPA + 1.1 g/d DHA (supplement) | Comparison between three genotypes                                   | HDL-c<br>LDL-c<br>TG<br>Total-c<br>Total-c:HDL-c    | <b>TG:</b> For <i>SCD1</i> rs508384, AA genotype was associated with lower TG than CA and CC genotypes both pre- and post-supplementation.                                                                                                                                                                                                                                                                                                                                                                                                                                                                   |
| Rudkowska et al. 2014 (2)   | Single-Arm Clinical Trial | Nutrigenomic GWAS | Healthy men and women                             | 6 weeks                    | Genetic Risk Score                                                                                   | <i>10CJ-SCHIP1</i> : 3q25.32 | Fish oil containing 1.9-2.2 g/d EPA +                          | Responders versus non-responders (i.e.                               | TG                                                  | Thirteen SNPs were associated with TG response to omega-3 supplementation and 10 were used in the GRS calculation.                                                                                                                                                                                                                                                                                                                                                                                                                                                                                           |

1  
2  
3  
4  
5  
6  
7  
8  
9  
10  
11  
12  
13  
14  
15  
16  
17  
18  
19  
20  
21  
22  
23  
24  
25  
26  
27  
28  
29  
30  
31  
32  
33  
34  
35  
36  
37  
38  
39  
40  
41  
42  
43  
44  
45  
46  
47

|                                   |                                                           |                   |                                                                     |              |                                                                                                                                                                                                                  |                                                                                                                                                                                              |                                                                  |                                                                                                                            |                                             |                                                                                                                                                                                                                                                                                                                                                                                                                                                                                                      |
|-----------------------------------|-----------------------------------------------------------|-------------------|---------------------------------------------------------------------|--------------|------------------------------------------------------------------------------------------------------------------------------------------------------------------------------------------------------------------|----------------------------------------------------------------------------------------------------------------------------------------------------------------------------------------------|------------------------------------------------------------------|----------------------------------------------------------------------------------------------------------------------------|---------------------------------------------|------------------------------------------------------------------------------------------------------------------------------------------------------------------------------------------------------------------------------------------------------------------------------------------------------------------------------------------------------------------------------------------------------------------------------------------------------------------------------------------------------|
|                                   |                                                           |                   | aged 18-50 (n=141) + Replication of GRS in FINGEN study (n=310)     |              | including: <i>IQCJ-SCHIP1</i> (4 SNPs), <i>SLIT2</i> (3 SNPs), <i>PHF17</i> (3 SNPs), <i>MYB</i> (1 SNP), <i>NXPH1</i> (1 SNP), <i>NELLI1</i> (1 SNP) [outlined in Supplementary Table 3]                        | <i>SLIT2</i> : 4p15.31<br><i>PHF17</i> : 4q28.2<br><i>MYB</i> : 6q23.3<br><i>NXPH1</i> : 7p21.3<br><i>NELLI1</i> : 11p15.1                                                                   | 1.1 g/d DHA (supplement)                                         | TG response) to supplementation                                                                                            |                                             | The GRS was significantly associated with TG response.<br><br><b>TG:</b> The GRS explained 21.5% of the variation in TG response when adjusted for age, sex and BMI. Replication of this GRS in the FINGEN study: the GRS explained 2.0% of the TG change but the association as NS (adjusted for age, sex and BMI).                                                                                                                                                                                 |
| Scorletti et al. 2015 (127)       | Randomized, Placebo-Controlled, Double-Blind Intervention | Single SNP        | Men and women with non-alcoholic fatty liver disease (n=95)         | 15-18 months | <i>PNPLA3</i> , <i>I148M</i> (rs738409)<br><i>TM6SF2</i> , <i>E167K</i> (rs58542926)                                                                                                                             | <i>PNPLA3</i> : 22q13.31<br><i>TM6SF2</i> : 19p13.11                                                                                                                                         | 1.8 g/day EPA+ 1.5 g/day DHA (supplement)                        | Comparison between three genotypes and Major allele homozygotes vs. Minor allele carriers                                  | TG                                          | --                                                                                                                                                                                                                                                                                                                                                                                                                                                                                                   |
| Thifault et al. 2013 (128)        | Single-Arm Clinical Trial                                 | Single SNP*       | Healthy men and women with overweight or obesity aged 18-50 (n=210) | 6 weeks      | <i>APOE</i> , rs429358, rs7412                                                                                                                                                                                   | <i>APOE</i> : 19q13.32                                                                                                                                                                       | Fish oil containing 1.9-2.2 g/d EPA and 1.1 g/d DHA (supplement) | <i>APOE</i> -E2 vs. <i>APOE</i> -E3 vs. <i>APOE</i> -E4                                                                    | apoB<br>HDL-c<br>LDL-c<br>TG<br>Total-c     | --                                                                                                                                                                                                                                                                                                                                                                                                                                                                                                   |
| Tremblay et al. 2015 (129)        | Single-Arm Clinical Trial                                 | Single SNP        | Healthy men and women aged 18-50 years (n=208)                      | 6 weeks      | <i>PLA2G2A</i> (5 SNPs), <i>PLA2G2C</i> (6 SNPs), <i>PLA2G2D</i> (8 SNPs), <i>PLA2G2F</i> (6 SNPs), <i>PLA2G4A</i> (22 SNPs), <i>PLA2G6</i> (5 SNPs), <i>PLA2G7</i> (9 SNPs) [outlined in Supplementary Table 3] | <i>PLA2G2A</i> : 1p36.13<br><i>PLA2G2C</i> : 1p36.13<br><i>PLA2G2D</i> : 1p36.12<br><i>PLA2G2F</i> : 1p36.12<br><i>PLA2G4A</i> : 1q31.1<br><i>PLA2G6</i> : 22q13.1<br><i>PLA2G7</i> : 6p12.3 | Fish oil containing 1.9 g/d EPA + 1.1 g/d DHA (supplement)       | Major allele homozygotes vs. Minor allele carriers or Comparison between three genotypes (depending on allele frequencies) | apoB-100<br>HDL-c<br>LDL-c<br>TG<br>Total-c | <b>TG:</b> omega-3 supplementation significantly reduced TG in <i>PLA2G7</i> rs1805018 as well as <i>PLA2G4A</i> rs10752979, rs10737277, rs7540602 and rs3820185; in the linear regression model, <i>PLA2G6</i> rs132989, <i>PLA2G7</i> rs679667, <i>PLA2G2D</i> rs12045689, <i>PLA2G4A</i> rs 10752979 and rs1160719 together explained 5.9% of post-supplementation TG levels                                                                                                                      |
| Vallée Marcotte et al. 2016 (130) | Single-Arm Clinical Trial                                 | Nutrigenomic GWAS | Men and woman aged 18-50 years (n=208)                              | 6 weeks      | <i>IQCJ</i> (16 SNPs), <i>NXPH1</i> (34 SNPs), <i>PHF17</i> (8 SNPs), <i>MYB</i> (9 SNPs) [outlined in                                                                                                           | <i>IQCJ</i> : 3q25.32<br><i>NXPH1</i> : 7p21.3<br><i>PHF17</i> : 4q28.2<br><i>MYB</i> : 6q23.3                                                                                               | Fish oil containing 1.9-2.2 g/d EPA + 1.1 g/d DHA (supplement)   | Comparison between three genotypes                                                                                         | TG                                          | <b>TG:</b> Significant gene-diet interaction on TG levels pre- vs. post-supplementation for the following SNPs: <i>IQCJ</i> (10 SNPs: rs2044704, rs1962071, rs6800211, rs17782879, rs1868414, rs2595260, rs9827242, rs1449009, rs2621309, rs61332355), <i>NXPH1</i> (4 SNPs: rs7806226, rs7805772, rs2349780, rs6974252), <i>MYB</i> (3 SNPs: rs9321493, rs11154794, rs210962). Four SNPs were still significant after applying the false discovery rate to account for multiple testing: rs1449009, |

1

2

3

4

|    |                                   |                                                                      |                                |                                                                                |                        |                                                                                 |                                                                         |                                                                                                  |                                                                                                                                                           |                                                                                                                                                                                                                                                                                                                                                                                                                                                                                                                                                                  |                                                                                                                                                                                                                                                                                                                                                                                                                                                                                                                                                                                                                                                                 |
|----|-----------------------------------|----------------------------------------------------------------------|--------------------------------|--------------------------------------------------------------------------------|------------------------|---------------------------------------------------------------------------------|-------------------------------------------------------------------------|--------------------------------------------------------------------------------------------------|-----------------------------------------------------------------------------------------------------------------------------------------------------------|------------------------------------------------------------------------------------------------------------------------------------------------------------------------------------------------------------------------------------------------------------------------------------------------------------------------------------------------------------------------------------------------------------------------------------------------------------------------------------------------------------------------------------------------------------------|-----------------------------------------------------------------------------------------------------------------------------------------------------------------------------------------------------------------------------------------------------------------------------------------------------------------------------------------------------------------------------------------------------------------------------------------------------------------------------------------------------------------------------------------------------------------------------------------------------------------------------------------------------------------|
| 5  |                                   |                                                                      |                                |                                                                                | Supplementary Table 3] |                                                                                 |                                                                         |                                                                                                  |                                                                                                                                                           | rs2621309, rs61332355 in <i>IQCJ</i> ; rs7805772 in <i>NXPPI</i> . There were four dominant SNPs driving the association with the TG response: rs61332355 and rs9827242 in <i>IQCJ</i> , rs7805772 in <i>NXPPI</i> and rs11154794 in <i>MYB</i> . Significant differences in genotype frequencies between positive and negative responders to omega-3 for TG changes for <i>IQCJ</i> rs2044704, rs1962071, rs17782879, rs1868414, rs2595260, rs9827242, rs1449009, rs2621309, rs61332355, <i>NXPPI</i> rs7806226, rs7805772, <i>MYB</i> rs11154794 and rs210936. |                                                                                                                                                                                                                                                                                                                                                                                                                                                                                                                                                                                                                                                                 |
| 11 | Vallée Marcotte et al. 2019 (131) | Single-Arm Clinical Trial (replication of GRS in a novel cohort)     | Nutrigenomic GWAS              | Healthy adults of Mexican descent aged 18-40 years (n=191)                     | 6 weeks                | Genetic Risk Score including 103 SNPs; [outlined in Supplementary Table 3]      | NA                                                                      | Fish oil containing 1.9 g/day EPA + 0.8 g/day DHA (supplement)                                   | Responders versus non-responders (i.e. TG response) to supplementation                                                                                    | TG                                                                                                                                                                                                                                                                                                                                                                                                                                                                                                                                                               | <b>TG:</b> A first 7-SNP GRS [SNPs selected based on previously developed GRS (2,130)] did not explain TG variation. A second GRS calculated from 103 SNPs significantly explained 4.4% of TG variation. A third GRS including the 5 most relevant SNPs significantly explained 11.0% of TG variation ( <i>NXPPI</i> rs10265408, rs10486228, rs10486228, rs17150341, rs6974252 and <i>IQCJ-SCHIP1</i> rs2595241). When subjects with the lowest TG change were not included, this third GRS explained more TG variation. Including only the 28 responders and 28 non-responders with the greatest TG variation, this third GRS explained 29.1% of TG variation. |
| 19 | Vallée Marcotte et al. 2019 (132) | Single-Arm Clinical Trial                                            | Nutrigenomics GWAS (polygenic) | Men and woman aged 18-50 years with overweight or obesity (n=208)              | 6 weeks                | GWAS; GRS included 31 SNPs [outlined in Supplementary Table 3]                  | NA                                                                      | Fish oil containing 1.9-2.2g/d EPA + 1.1g/d DHA (supplement)                                     | Responders to omega-3 supplementation for TG reduction vs. Non-Responders                                                                                 | TG                                                                                                                                                                                                                                                                                                                                                                                                                                                                                                                                                               | <b>TG:</b> 31 SNPs associated with TG response to omega-3 supplementation and used in GRS calculation; Lower GRSs were significantly more responsive to omega-3 supplementation for TG reduction compared to higher GRS (GRS accounted for 49.7% of TG responses); These findings were replicated in the FINGEN study with 23 SNPs (GRS accounted for 3.7% of TG responses).                                                                                                                                                                                                                                                                                    |
| 26 | Vallée Marcotte et al. 2020 (65)  | Double-Blind, Randomized, Controlled, Crossover Intervention         | Nutrigenomics GWAS (polygenic) | Men and women with abdominal obesity and elevated CRP aged 18-70 years (n=122) | 10 weeks per diet      | GRS included 30 SNPs [outlined in Supplementary Table 3]                        | NA                                                                      | Control oil: 3 g/d corn oil<br>Pure EPA: 2.7 g/d<br>Pure DHA: 2.7 g/d (supplement)               | Responders to different types of omega-3 supplementation for TG reduction vs. Non-Responders vs. Adverse Responders and Responders vs. Adverse Responders | TG                                                                                                                                                                                                                                                                                                                                                                                                                                                                                                                                                               | <b>TG:</b> The GRS was significantly associated with responsiveness to EPA for TG reduction when comparing responders vs. non-responders vs. adverse responders (trend, p=0.08, for DHA). The GRS was significantly associated with responsiveness to both EPA and DHA for TG reduction when comparing responders vs. adverse responders.                                                                                                                                                                                                                                                                                                                       |
| 33 | Wu et al. 2014 (133)              | Double-Blind, Randomized, Placebo-Controlled, Crossover Intervention | Single SNP                     | Men and women with moderate risk of CVD (n=84)                                 | 8 weeks                | <i>eNOS</i> Glu298Asp (rs1799983)                                               | <i>NOS3</i> : 7q36.1                                                    | Fish oil containing 0.9 g/day EPA + 0.6 g/day DHA (supplement)                                   | Major allele homozygotes (GG) vs. Minor allele carriers (GT+TT)                                                                                           | LDL-c<br>HDL-c<br>TG<br>Total-c                                                                                                                                                                                                                                                                                                                                                                                                                                                                                                                                  | -                                                                                                                                                                                                                                                                                                                                                                                                                                                                                                                                                                                                                                                               |
| 37 | Zheng et al. 2018 (134)           | Double-Blind, Randomized, Controlled Intervention                    | Single SNP and Polygenic       | Men and women with type 2 diabetes aged 35-80 years for men or postmenopausal  | 25 weeks               | <i>CD36</i> , rs1527483<br><i>NOS3</i> , rs1799983<br><i>PPARγ2</i> , rs1801282 | <i>CD36</i> : 7q21.11<br><i>NOS3</i> : 7q36.1<br><i>PPARγ2</i> : 3p25.2 | Fish oil: 2.0 g/d EPA and DHA<br>Flaxseed oil: 2.5 g/d ALA<br>Control oil: corn oil (supplement) | Major allele homozygotes vs. Minor allele carriers and High vs. low genetic score calculated                                                              | HDL-c<br>LDL-c<br>TG<br>Total-c:HDL-c<br>Total-c                                                                                                                                                                                                                                                                                                                                                                                                                                                                                                                 | <b>LDL-c:</b> significant interaction for <i>PPARγ2</i> rs1801282 genotype, intervention group and LDL-c change; but increased LDL-c in G allele carriers of <i>PPARγ2</i> rs1801282 compared to CC genotype <i>only in the control</i> (corn oil) group<br><b>TG:</b> omega-3 fish oil (but not flaxseed oil) supplementation reduced TG for individuals with the <i>CD36</i> rs1527483 GG genotype (significant interaction); significant interaction                                                                                                                                                                                                         |

41

42

43

44

45

46

47

1  
2  
3  
4  
5  
6  
7  
8  
9  
10  
11  
12  
13  
14  
15  
16  
17  
18  
19  
20  
21  
22  
23  
24  
25  
26  
27  
28  
29  
30  
31  
32  
33  
34  
35  
36  
37  
38  
39  
40  
41  
42  
43  
44  
45  
46  
47

|  |  |  |                                  |  |  |  |  |                     |  |                                                                                                                                                                                                             |
|--|--|--|----------------------------------|--|--|--|--|---------------------|--|-------------------------------------------------------------------------------------------------------------------------------------------------------------------------------------------------------------|
|  |  |  | 1 and 80 years for women (n=139) |  |  |  |  | based on three SNPs |  | between genetic score and omega-3 on TG levels whereby omega-3 (fish oil and flaxseed oil) supplementation significantly reduced TG levels compared to control only in individuals with high genetic scores |
|--|--|--|----------------------------------|--|--|--|--|---------------------|--|-------------------------------------------------------------------------------------------------------------------------------------------------------------------------------------------------------------|

ALA: alpha-linolenic acid, Apo: apolipoprotein, DHA: docosahexaenoic acid, EPA: eicosapentaenoic acid, HDL: high-density lipoprotein cholesterol, LDL: low-density lipoprotein cholesterol, omega-3: omega-3, N/A: not applicable, NS: Non-significant, sdLDL-c: small, dense, low-density lipoprotein cholesterol, SNP: single nucleotide polymorphism, TG: triglycerides  
 1. All other (not listed) gene/omega-3/lipid/lipoprotein results of interest to the present review were NS  
 Participants are described as “healthy” for studies that incorporated exclusion criteria for certain conditions, blood lipid levels, etc. and when studies described the population as “healthy.”  
 ‘-’ indicates that all of the completed gene/omega-3/lipid/lipoprotein analyses were NS  
 \*Human *APOE* is polymorphic at two single nucleotides (rs429358 and rs7412) resulting in three different alleles ( $\epsilon 2$ ,  $\epsilon 3$  and  $\epsilon 4$ )

**Table 3. GRADE Evidence Profile: Genetic Variation, Omega-3 and Lipids**

| Nutrigenetic interactions for omega-3 and plasma lipid/lipoprotein outcomes                                                                                                                                                         |                                  |                                    |                                   |                                       |                  |                           |                                   |                 |                                                                                                                                                                                            |
|-------------------------------------------------------------------------------------------------------------------------------------------------------------------------------------------------------------------------------------|----------------------------------|------------------------------------|-----------------------------------|---------------------------------------|------------------|---------------------------|-----------------------------------|-----------------|--------------------------------------------------------------------------------------------------------------------------------------------------------------------------------------------|
| Patient or Population: adults<br>Intervention/Exposure: dietary or supplemental omega-3 (EPA and/or DHA and/or ALA)<br>Comparison/Control: genetic variation, different omega-3 intakes<br>Outcomes: plasma lipids and lipoproteins |                                  |                                    |                                   |                                       |                  |                           |                                   |                 |                                                                                                                                                                                            |
| Gene rs Number and Lipid: Number and Type of Studies (total n)                                                                                                                                                                      | Limitations                      | Inconsistency                      | Indirectness                      | Imprecision                           | Publication Bias | Dose Response             | Biological Plausibility*          | Quality         | Conclusion                                                                                                                                                                                 |
| <b>CD36 rs1761667 and HDL-c:</b><br>1 RCT and 1 single arm trial (n=115) (80,135)                                                                                                                                                   | Serious limitations <sup>a</sup> | Serious inconsistency <sup>b</sup> | Serious indirectness <sup>c</sup> | Serious imprecision <sup>d</sup>      | Undetected       | No evidence of a gradient | Evidence of a mechanism of action | ⊕⊕⊖⊖ (Low)      | Weak evidence suggests that possessing the GA or possibly the AA genotype of <i>CD36</i> rs1761667 could lead to significant increases in HDL-c in response to 0.8-3.0 g/day of omega-3s.  |
| <b>CD36 rs1761667 and TG:</b><br>1 RCT and 1 single arm trial (n=115) (80,135)                                                                                                                                                      | Serious limitations <sup>a</sup> | Serious inconsistency <sup>b</sup> | Serious indirectness <sup>c</sup> | Serious imprecision <sup>e</sup>      | Undetected       | No evidence of a gradient | Evidence of a mechanism of action | ⊕⊕⊖⊖ (Low)      | Weak evidence suggests that possessing the GA or possibly the GG genotype of <i>CD36</i> rs1761667 could lead to significant reductions in TG in response to 0.8-3.0 g/day of omega-3s.    |
| <b>CD36 rs1049673 and HDL-c:</b><br>1 RCT and 1 single arm trial (n=115) (80,135)                                                                                                                                                   | Serious limitations <sup>a</sup> | Serious inconsistency <sup>b</sup> | Serious indirectness <sup>c</sup> | No serious imprecision                | Undetected       | No evidence of a gradient | Evidence of a mechanism of action | ⊕⊕⊖⊖ (Low)      | Weak evidence suggests that possessing the CG or possibly the CC genotype of <i>CD36</i> rs1049673 could lead to significant increases in HDL-c in response to 0.8-3.0 g/day of omega-3s.  |
| <b>CD36 rs1527483 and TG:</b><br>1 RCT and 1 single arm trial (n=250) (66,80)                                                                                                                                                       | Serious limitations <sup>f</sup> | No serious inconsistency           | Serious indirectness <sup>g</sup> | Very serious imprecision <sup>e</sup> | Undetected       | No evidence of a gradient | Evidence of a mechanism of action | ⊕⊕⊖⊖ (Low)      | Weak evidence suggests that possessing the GG genotype of <i>CD36</i> rs1527483 could lead to significant decreases in TG in response to approximately 2.0 g/day of EPA+DHA (but not ALA). |
| <b>APOE rs429358, rs7412 and TG:</b> 4 RCTs and 5 single arm trials (1 single arm trial consisted of a                                                                                                                              | No serious limitations           | No serious inconsistency           | Serious indirectness <sup>h</sup> | No serious imprecision                | Undetected       | Evidence of a gradient    | Evidence of a mechanism of action | ⊕⊕⊕⊖ (Moderate) | Strong evidence suggests that adult males (but not females) with the <i>APOE</i> -E3/E4 or E4/E4 genotype (rs429358, rs7412) experience significant reductions in TG in                    |

1  
2  
3  
4  
5  
6  
7  
8  
9  
10  
11  
12  
13  
14  
15  
16  
17  
18  
19  
20  
21  
22  
23  
24  
25  
26  
27  
28  
29  
30  
31  
32  
33  
34  
35  
36  
37  
38  
39  
40  
41  
42  
43  
44  
45  
46  
47

|                                                                                                                                                                                                                                           |                                        |                                         |                                        |                                  |            |                                     |                                                     |                                                                              |                                                                                                                                                                                                                                                                                                                                                                                                                                                  |
|-------------------------------------------------------------------------------------------------------------------------------------------------------------------------------------------------------------------------------------------|----------------------------------------|-----------------------------------------|----------------------------------------|----------------------------------|------------|-------------------------------------|-----------------------------------------------------|------------------------------------------------------------------------------|--------------------------------------------------------------------------------------------------------------------------------------------------------------------------------------------------------------------------------------------------------------------------------------------------------------------------------------------------------------------------------------------------------------------------------------------------|
| subset sample of another single arm trial) (n=980) (70–74,76–79)                                                                                                                                                                          |                                        |                                         |                                        |                                  |            |                                     |                                                     |                                                                              | response to 0.7-3.7 g/day of EPA and/or DHA. Higher dosages may have greater TG lowering effects.                                                                                                                                                                                                                                                                                                                                                |
| <b>APOE rs429358, rs7412 and Total-c:</b> 4 RCTs, 5 single arm trials (1 single arm trial consisted of a subset sample of another single arm trial), 1 cross-sectional and longitudinal analysis within an RCT (n=2,446) (53,70–74,76–79) | No serious limitations                 | Serious inconsistency <sup>i</sup>      | Serious indirectness <sup>h</sup>      | No serious imprecision           | Undetected | No evidence of a gradient           | Lack of evidence of a mechanism of action           | ⊕⊕⊕⊖<br>(Moderate: Males and Females)<br><br>and<br><br>⊕⊕⊖⊖<br>(Low: Males) | In males and females combined, strong evidence suggests that there is no nutrigenetic interaction between EPA and/or DHA, <i>APOE</i> (rs429358, rs7412) and total-c. There is no evidence of a nutrigenetic interaction between ALA, <i>APOE</i> (rs429358, rs7412) and total-c. In male subgroups, weak evidence suggests that there is no nutrigenetic interaction between ALA or EPA and/or DHA, <i>APOE</i> (rs429358, rs7412) and total-c. |
| <b>31-SNP Nutri-GRS and TG:</b> 1 RCT, 1 single arm trial (n=330) (64,65)                                                                                                                                                                 | No serious limitations                 | No serious inconsistency                | Serious indirectness <sup>j</sup>      | No serious imprecision           | Undetected | Evidence of a gradient <sup>k</sup> | Some evidence of a mechanism of action <sup>l</sup> | ⊕⊕⊕⊕<br>High                                                                 | Strong evidence suggests that in adults with overweight/obesity, a 31-SNP genetic risk score can predict TG responsiveness to EPA+DHA supplementation. Individuals with lower genetic risk scores demonstrate greater responsiveness to EPA+DHA for TG lowering.                                                                                                                                                                                 |
| <b>PPARG2 rs1801282 and LDL-c:</b> 4 RCTs, 1 single arm trial (n=670) (61,66,83,84,87)                                                                                                                                                    | No serious limitations                 | No serious inconsistency                | Serious indirectness <sup>m</sup>      | Serious imprecision <sup>n</sup> | Undetected | No evidence of a gradient           | Lack of evidence of a mechanism of action           | ⊕⊕⊕⊖<br>(Moderate)                                                           | Strong evidence suggests that genetic variation in <i>PPARG2</i> (rs1801282) does not influence LDL-c responses to omega-3s (EPA+DHA).                                                                                                                                                                                                                                                                                                           |
| <b>PPARG2 rs1801282 and Total-c:</b> 4 RCTs, 1 single arm trial (n=670) (61,66,83,84,87)                                                                                                                                                  | No serious limitations                 | Serious inconsistency <sup>o</sup>      | Serious indirectness <sup>m</sup>      | Serious imprecision <sup>n</sup> | Undetected | No evidence of a gradient           | Lack of evidence of a mechanism of action           | ⊕⊕⊖⊖<br>(Low)                                                                | Weak evidence suggests that possessing the CG or GG genotype of <i>PPARG2</i> (rs1801282) could lead to significant increases in total-c in response to approximately 3 g/day of omega-3s (EPA+DHA) in individuals with overweight or obesity, but not for individuals without overweight or obesity.                                                                                                                                            |
| <b>PPARG2 rs1801282 and TG:</b> 4 RCTs, 1 single arm trial (n=670) (61,66,83,84,87)                                                                                                                                                       | No serious limitations                 | Very serious inconsistency <sup>p</sup> | Serious indirectness <sup>m</sup>      | Serious imprecision <sup>n</sup> | Undetected | No evidence of a gradient           | Evidence of a mechanism of action                   | ⊕⊕⊖⊖<br>(Low)                                                                | Weak evidence suggests that genetic variation in <i>PPARG2</i> (rs1801282) does not influence total-c responses to omega-3s (EPA+DHA), but when dietary total fat and saturated fat intake are low, nutrigenetic interactions may exist.                                                                                                                                                                                                         |
| <b>FADS (rs174547**) and Total-c:</b> 2 RCTs, 1 single-arm trial, 4 cross-                                                                                                                                                                | Very serious risk of bias <sup>q</sup> | No serious inconsistency                | Very serious indirectness <sup>r</sup> | Serious imprecision <sup>n</sup> | Undetected | No evidence of a gradient           | Evidence of a mechanism of action                   | ⊕⊖⊖⊖<br>(Very Low)                                                           | Weak evidence suggests that genetic variation in <i>FADS</i> (rs174547**) does not influence total-c responses to omega-3.                                                                                                                                                                                                                                                                                                                       |



1  
2  
3  
4  
5  
6  
7  
8  
9  
10  
11  
12  
13  
14  
15  
16  
17  
18  
19  
20  
21  
22  
23  
24  
25  
26  
27  
28  
29  
30  
31  
32  
33  
34  
35  
36  
37  
38  
39  
40  
41  
42  
43  
44  
45  
46  
47

|                                                      |  |  |  |  |  |  |  |  |  |
|------------------------------------------------------|--|--|--|--|--|--|--|--|--|
| sectional studies (n=9365)<br>(42,43,45,46,60,68,70) |  |  |  |  |  |  |  |  |  |
|------------------------------------------------------|--|--|--|--|--|--|--|--|--|

\*Direct mechanisms of action were considered

\*\*FADS rs174547 was in strong LD with the following SNPs from other included studies and therefore these SNPs were also included in the selection of studies assessing FADS genetic variation, n-3 intake and LDL-c: rs174546, rs174599, rs174601, rs174583, rs1353, rs174561, rs174556, rs174545, rs174537 and rs174576.

HDL-c: high-density lipoprotein cholesterol, LDL-c: low-density lipoprotein cholesterol, TG: triglycerides, total-c: total cholesterol

- a. Small sample sizes, especially among homozygous groups in the RCT (with a larger heterozygous group, potentially affecting the results)
- b. Some variation in results by genotype
- c. One study sample consisted of all males while the other sample consisted of both men and women; differences in age and n-3 dosages (with some overlap)
- d. Coefficient of variation >1 for all significant values
- e. Coefficient of variation substantially >1 for several values
- f. Small sample size within genotype groups for minor allele homozygote and heterozygote groups in the RCT
- g. One study sample consisted of all men while the other consisted of men and postmenopausal women with type 2 diabetes
- h. Differences in age, omega-3 dosages, and types (with some overlap), and dietary interventions even when considering studies with male study samples separate from male + female study samples
- i. Serious inconsistency for men subgroup only; men + women samples were consistent
- j. EPA and DHA separate on one study and EPA+DHA in the other, sample stratified into two groups in one study (responders and non-responders) and separated into three groups (responders, non-responders and adverse responders)
- k. Evidence of a gradient for GRS and TG responsiveness to omega-3 supplementation
- l. Some evidence of a potential mechanism of action for *IQCJ-SCHIP1*, *NXP1*, *PHF17*, *MYB* and *NELL1* as discussed by Rudkowska et al. (62), Vallée Marcotte et al. (63)
- m. Differences in population (healthy adults, adults with chronic disease or obesity, infants), some variation in length of follow-up
- n. Downgraded precision as it was not possible to assess precision in most studies due to lack of reporting of means and SD/SEM
- o. Some variation in results even when considering differences in BMI and populations among studies
- p. Major variability in results even when considering differences in BMI and populations among studies
- q. Risk of bias detected in every study except one
- r. Major differences in populations, types and amounts of omega-3 and follow-up for interventional studies

1  
2  
3  
4  
5  
6  
7  
8  
9  
10  
11  
12  
13  
14  
15  
16  
17  
18  
19  
20  
21  
22  
23  
24  
25  
26  
27  
28  
29  
30  
31  
32  
33  
34  
35  
36  
37  
38  
39  
40  
41  
42  
43  
44  
45  
46  
47

For peer review only

**Table 4. Summary of Risk of Bias Across SNPs and Outcomes Following Omega-3 Exposure/Intervention**

| <i>CD36, rs1761667 and HDL-c</i>          |                     |
|-------------------------------------------|---------------------|
| <b>Study</b>                              | <b>Risk of Bias</b> |
| Dawczynski et al. 2013                    | ⊖                   |
| Madden et al. 2008                        | ⊖                   |
| <i>CD36, rs1761667 and TG</i>             |                     |
| <b>Study</b>                              | <b>Risk of Bias</b> |
| Dawczynski et al. 2013                    | ⊖                   |
| Madden et al. 2008                        | ⊖                   |
| <i>CD36, rs1049673 and HDL-c</i>          |                     |
| <b>Study</b>                              | <b>Risk of Bias</b> |
| Dawczynski et al. 2013                    | ⊖                   |
| Madden et al. 2008                        | ⊖                   |
| <i>CD36, rs1527483 and TG</i>             |                     |
| <b>Study</b>                              | <b>Risk of Bias</b> |
| Zheng et al. 2018                         | ⊕                   |
| Madden et al. 2008                        | ⊖                   |
| <i>ApoE, rs429358, rs7412 and TG</i>      |                     |
| <b>Study</b>                              | <b>Risk of Bias</b> |
| AbuMweis et al. 2018                      | ⊖                   |
| Carvalho-Wells et al. 2012                | ⊕                   |
| Caslake et al. 2008                       | ⊕                   |
| Dang et al. 2015                          | ⊕                   |
| Jackson et al. 2012                       | ⊖                   |
| Minihane et al. 2000                      | ⊕                   |
| Olano-Martin et al. 2010                  | ⊕                   |
| Paschos et al. 2005                       | ⊖                   |
| Thifault et al. 2013                      | ⊕                   |
| <i>ApoE, rs429358, rs7412 and Total-c</i> |                     |
| <b>Study</b>                              | <b>Risk of Bias</b> |
| AbuMweis et al. 2018                      | ⊖                   |
| Carvalho-Wells et al. 2012                | ⊕                   |
| Caslake et al. 2008                       | ⊕                   |
| Dang et al. 2015                          | ⊕                   |
| Fallaize et al. 2016                      | ⊖                   |
| Jackson et al. 2012                       | ⊖                   |
| Minihane et al. 2000                      | ⊕                   |
| Olano-Martin et al. 2010                  | ⊕                   |
| Paschos et al. 2005                       | ⊖                   |
| Thifault et al. 2013                      | ⊕                   |
| <i>31-SNP Nutri-GRS and TG</i>            |                     |
| <b>Study</b>                              | <b>Risk of Bias</b> |
| Vallée Marcotte et al. 2019               | ⊕                   |
| Vallée Marcotte et al. 2020               | ⊕                   |

| <i>PPARG2, rs1801282 and LDL-c</i>   |              |
|--------------------------------------|--------------|
| Study                                | Risk of Bias |
| Binia et al. 2017                    | ⊖            |
| Harslof et al. 2014                  | ⊕            |
| Itariu et al. 2012                   | ⊕            |
| Lindi et al. 2003                    | ⊖            |
| Zheng et al. 2018                    | ⊕            |
| <i>PPARG2, rs1801282 and Total-c</i> |              |
| Study                                | Risk of Bias |
| Binia et al. 2017                    | ⊖            |
| Harslof et al. 2014                  | ⊕            |
| Itariu et al. 2012                   | ⊕            |
| Lindi et al. 2003                    | ⊖            |
| Zheng et al. 2018                    | ⊕            |
| <i>PPARG2, rs1801282 and TG</i>      |              |
| Study                                | Risk of Bias |
| Binia et al. 2017                    | ⊖            |
| Harslof et al. 2014                  | ⊕            |
| Itariu et al. 2012                   | ⊕            |
| Lindi et al. 2003                    | ⊖            |
| Zheng et al. 2018                    | ⊕            |
| <i>FADS, rs174547 and Total-c</i>    |              |
| Study                                | Risk of Bias |
| AbuMweis et al. 2018                 | ⊖            |
| Alsaleh et al. 2014                  | ⊕            |
| Lu et al. 2010                       | ⊖            |
| Standl et al. 2012                   | ⊖            |
| Dumont et al. 2011                   | ⊖            |
| Dumont et al. 2018                   | ⊖            |
| Roke and Mutch 2014                  | ⊖            |

⊕ no serious risk of bias; ⊖ serious risk of bias; ⊖⊖ very serious risk of bias (for study design type using NIH Study Quality Assessment Tools)

HDL-c: high-density lipoprotein cholesterol, LDL-c: low-density lipoprotein cholesterol, TG: triglycerides, total-c: total cholesterol

1  
2  
3 271 **DISCUSSION**

4 272  
5 273 Overall, this systematic review found strong evidence (i.e. GRADE ratings: moderate and  
6  
7  
8 274 high quality evidence) for only a limited amount of evidence in this area: *APOE*  
9  
10 275 (rs429358 and rs7412) genotypes and TG responsiveness to omega-3s in men, and a 31-  
11  
12 276 SNP nutri-GRS and TG responsiveness to omega-3s in adults with overweight/obesity.  
13  
14 277 Limited evidence exists for individual genetic-based responsiveness of omega-3s on  
15  
16 278 apolipoprotein and/or LDL particle size, with no studies from the present comprehensive  
17  
18 279 review meeting the criteria for evidence. This highlights the need for more replication  
19  
20 280 studies in this area. While more research exists on omega-3 responsiveness for other lipid  
21  
22 281 outcomes such as total-c, HDL-c and LDL-c, the level of evidence for nutrigenetic  
23  
24 282 interactions related to these outcomes remains low. Again, more studies are needed  
25  
26 283 related to these outcomes, including replication studies of previously identified  
27  
28 284 nutrigenetic interactions. These studies should first replicate the interventions (i.e. use the  
29  
30 285 same type and amount of omega-3s as the original study), and recruit samples with  
31  
32 286 similar characteristics to the original study. Once replication is established, research  
33  
34 287 should then seek to expand the population studied to improve generalizability and explore  
35  
36 288 the effectiveness of different interventions (i.e. different formulations and doses of  
37  
38 289 omega-3s). The variability of the interventions and sample sizes in the studies conducted  
39  
40 290 to date often resulted in the quality of evidence being downgraded (see Table 3). It should  
41  
42 291 also be noted that study heterogeneity precluded the ability to conduct a meta-analysis.  
43  
44 292 Thus, the GRADE approach worked well for evaluating the quality of the evidence given  
45  
46 293 that this approach takes into consideration several factors when determining the quality of  
47  
48  
49  
50  
51  
52  
53  
54  
55  
56  
57  
58  
59  
60

1  
2  
3 294 evidence such as risk of bias, indirectness of evidence, inconsistency or results,  
4  
5 295 imprecision and publication bias (37).  
6  
7  
8 296

9  
10 297 It is important to note that our results demonstrating strong evidence for interactions  
11  
12 298 between *APOE* genotypes and lipid responses to omega-3s have notable ethical  
13  
14 299 implications. Compared to non-carriers, carriers of *APOE*-E4 have a 15 times greater risk  
15  
16 300 of developing Alzheimer's disease (136). Moreover, *APOE* genotypes are significantly  
17  
18 301 associated with CVD risk including risk of coronary artery disease and hyperlipidemia  
19  
20 302 (137–139). Interestingly, the pathology of Alzheimer's disease has been linked to  
21  
22 303 cardiovascular mechanisms (136). Future research should explore nutrigenetic  
23  
24 304 interactions, with risk of developing Alzheimer's disease as the study endpoint/outcome  
25  
26 305 of interest. Despite the current lack of knowledge about how diet may play a role in  
27  
28 306 mitigating the genetic-based risk of Alzheimer's disease, several potentially modifiable  
29  
30 307 risk factors account for around 40% of dementia and Alzheimer's disease globally (140),  
31  
32 308 and the link between Alzheimer's disease risk and *APOE* is well-established (141).  
33  
34 309 Therefore, despite the strong scientific validity identified in the present review, there are  
35  
36 310 other factors that must be considered before this test can be recommended for  
37  
38 311 implementation in a practice setting; this includes ethical, legal and social implications  
39  
40 312 (142).  
41  
42  
43  
44  
45  
46  
47  
48

49 314 In addition, our finding of strong evidence for *APOE* genotypes and TG responsiveness  
50  
51 315 to omega-3s in men but not women speaks to the importance of taking biological sex into  
52  
53 316 account in nutrigenetics research. The importance of this has been further highlighted  
54  
55  
56  
57  
58  
59  
60

1  
2  
3 317 elsewhere, where it has been noted that the results of nutrigenetic research may differ in  
4  
5 318 men and women (143). As more studies are completed, researchers may find that certain  
6  
7 319 nutrigenetic interactions differ depending on biological sex, ethnicity, age or other  
8  
9  
10 320 factors, similar to our findings on *APOE*, omega-3s and TG in which there was evidence  
11  
12 321 of a nutrigenetic interaction in males only. Researchers may also find explanations for  
13  
14 322 this, which are currently poorly understood. In general, it is becoming increasingly  
15  
16 323 recognized that health-related responses to different interventions may vary based on  
17  
18 324 biological sex; this is an important consideration of personalized nutrition (143).  
19  
20 325 Nutrigenetic research often groups men and women together, but stratifying based on  
21  
22 326 biological sex could provide further insights for specific nutrigenetic interactions and  
23  
24 327 could also help explain why some replication studies have not demonstrated significant  
25  
26 328 findings (143). Moreover, biomedical research in general historically has been conducted  
27  
28 329 more in men than women; yet such research findings are often generalized to women  
29  
30 330 despite limited research conducted in samples of women, which is problematic for a  
31  
32 331 number of reasons (144). In the present review, the evidence was strong for the *APOE*  
33  
34 332 findings in men only, but not women in part because there were more studies conducted  
35  
36 333 in men. Specifically, there were five studies conducted in men and women (combined)  
37  
38 334 (70,72,73,112,128), and four studies conducted in samples of only men (74,77,78,121),  
39  
40 335 yet no studies conducted in samples of only women. This brings to light important issues  
41  
42 336 of equity and warrants further discussion and consideration.  
43  
44  
45  
46  
47  
48  
49  
50

51 337  
52 338 As research continues to develop, it appears likely that lipid and lipoprotein responses are  
53  
54 339 polygenic in nature. Therefore, future research should consider using nutri-GRSs or other  
55  
56  
57  
58  
59  
60

1  
2  
3 340 polygenic methods of assessing responsiveness to nutrition interventions. This work  
4  
5 341 should use unbiased approaches or non-hypothesis driven approach to derive nutri-GRSs,  
6  
7 342 such as establishing them from genetic-wide association studies. In addition to the two  
8  
9 343 studies meeting the criteria for evidence grading (64,65), a modified version of the 31-  
10  
11 344 SNP GRS was tested in men and women in the FINGEN study, using 23 of the 31 SNPs  
12  
13 345 (64). While this did not meet our inclusion criteria for evidence grading given that a  
14  
15 346 different GRS was used, the 23-SNP GRS was significantly associated with TG  
16  
17 347 responsiveness to omega-3 supplementation in this population as well, providing further  
18  
19 348 evidence for the scientific validity of this nutrigenetic interaction (64).  
20  
21  
22  
23  
24  
25

26 350 While we used the GRADE approach to evaluate the body of evidence, several tools are  
27  
28 351 available for evaluating the quality of scientific evidence, though no generally accepted  
29  
30 352 methods exist for nutrigenetic research specifically. In 2017, Grimaldi et al. proposed a  
31  
32 353 set of guidelines to assess the scientific validity of genotype-based dietary advice (29).  
33  
34 354 While we originally intended to use these guidelines for assessing the evidence, we came  
35  
36 355 across some limitations that ultimately led us to use the GRADE guidelines. Specifically,  
37  
38 356 Grimaldi et al. (2017) suggested that only studies that include STREGA guidelines  
39  
40 357 should be included in the assessment of scientific validity (29). However, limiting the  
41  
42 358 evidence to only these studies could result in several important studies being missed. In  
43  
44 359 the present review, none of the included studies explicitly indicated that they followed  
45  
46 360 STREGA guidelines. In addition, it was recommended by Grimaldi et al. to use STREGA  
47  
48 361 guidelines to assess risk of bias (29). However, the STREGA checklist is only intended  
49  
50 362 for observational genetic association studies - not interventional research (145). In the  
51  
52  
53  
54  
55  
56  
57  
58  
59  
60



1  
2  
3 363 present review, 42 of the 65 included studies were interventional (65%) (Table 2). In  
4  
5 364 addition, the STREGA guidelines are intended to improve the transparency and adequate  
6  
7 365 reporting of genetic association studies, but it is not intended to be used as a study quality  
8  
9  
10 366 assessment tool (145). However, Grimaldi et al. nicely highlighted the importance of  
11  
12 367 understanding the nature of the genetic variation, at a functional level, when assessing  
13  
14 368 scientific validity (29). This is not included in the standard GRADE approach but is an  
15  
16 369 important niche component of nutrigenetic research. As such, an analysis of functional  
17  
18 370 SNPs (biological plausibility) was included as an additional component of the standard  
19  
20 371 GRADE process, as indicated in the methods section above. Overall, we found that the  
21  
22 372 methods used in this systematic review were effective and can be used to synthesize and  
23  
24 373 evaluate nutrigenetic studies assessing other gene-nutrient-health outcome interactions.  
25  
26  
27  
28 374  
29  
30 375 The additional consideration of functional SNPs to the standard GRADE approach helped  
31  
32 376 to strengthen this review, as biological mechanistic evidence can help ensure that study  
33  
34 377 findings did not occur by chance alone, and this is a component of evidence evaluation  
35  
36 378 frameworks in medical genetics (146,147). Transcriptomic and pathway analyses can  
37  
38 379 help inform the direction of future nutrigenetic studies by generating hypotheses about  
39  
40 380 the impact of specific genetic variations on varying responses to nutrition on health-  
41  
42 381 related outcomes. For example, using transcriptomics and pathway analyses to identify  
43  
44 382 changes in lipid metabolism following omega-3 supplementation, Rudkowska and  
45  
46 383 colleagues identified six genes expressed in opposite directions between responders and  
47  
48 384 non-responders to omega-3 supplementation for TG lowering: *FADS2*, *PLA2G4A*,  
49  
50 385 *ALOX15*, *PEN1*, *MGLL* and *GPAM* (148). Tremblay et al. then built on this knowledge  
51  
52  
53  
54  
55  
56  
57  
58  
59  
60

1  
2  
3 386 and discovered that *PLA2G6* rs132989, *PLA2G7* rs679667, *PLA2G2D* rs12045689,  
4  
5 387 *PLA2G4A* rs10752979 and rs1160719 together explained 5.9% of post- omega-3  
6  
7 388 supplementation TG levels, with several individual *PLA2G4A* SNPs also having a  
8  
9 389 significant impact on the TG lowering effect of omega-3 supplementation (129). Others  
10  
11 390 have built on this mechanistic knowledge as well (122). Future research should now seek  
12  
13 391 to replicate this work given that we found that there have been no replication studies  
14  
15 392 completed and thus, this research (122,129) did not meet the criteria for evidence  
16  
17 393 grading.  
18  
19  
20  
21  
22

23  
24 395 In the current body of literature, there are some limitations that should be highlighted.  
25  
26 396 Given the variability in allele frequencies for each SNP, it should be noted that study  
27  
28 397 limitations can arise with small sample sizes whereby some genotype groups may not be  
29  
30 398 adequately powered to detect significant differences. For example, Dawczynski et al.  
31  
32 399 (2013) detected significant changes in TG among the GA genotype group of *CD36*  
33  
34 400 rs1761667 (n=18) in response to omega-3s but neither of the homozygote groups (AA:  
35  
36 401 n=8, GG: n=7) exhibited a significant difference, despite similar directions and  
37  
38 402 magnitudes of effect among the GA and GG genotypes (81). It is thus possible that this  
39  
40 403 study was not adequately powered. Some researchers aim to mitigate this issue of small  
41  
42 404 numbers by grouping minor allele carriers together (i.e. heterozygotes + homozygotes for  
43  
44 405 the minor allele) (68). However, such an approach precludes the possibility to detect an  
45  
46 406 allele-dosage effect. From a physiological perspective, an allele dosage effect would be  
47  
48 407 expected whereby a significant change among a heterozygote group would likely be  
49  
50 408 accompanied by a significant change in one of the homozygote groups but with an even  
51  
52  
53  
54  
55  
56  
57  
58  
59  
60

1  
2  
3 409 greater magnitude of the effect. This consideration highlights the importance of having an  
4  
5 410 adequately powered sample size, while factoring in the prevalence of each genotype.  
6  
7

8 411

9  
10 412 While single SNP research provides important information about individual gene-nutrient  
11  
12 413 interactions, the results of this review indicate that individual responses to omega-3s for  
13  
14 414 altering lipids, lipoproteins and apolipoproteins appear to be polygenic in nature. Thus,  
15  
16 415 we encourage researchers to further explore the use of nutri-GRSs to improve the  
17  
18 416 accuracy of genetic-based predictions. See, for example, the work of Vallée Marcotte et  
19  
20 417 al., which obtained a high quality evidence grade in the present review (64,65). This is  
21  
22 418 further exemplified in the analyses recently conducted by Chen et al. (40), which has yet  
23  
24 419 to be replicated and thus was not selected for evidence grading.  
25  
26  
27

28 420

29  
30  
31 421 The present analysis of scientific validity provides an important first step towards the  
32  
33 422 eventual development of clinical practice guidelines for genetic-based responses to  
34  
35 423 dietary intake. With questionable and variable scientific validity of existing consumer  
36  
37 424 nutrigenetic tests, the development of clinical practice guidelines is an important next  
38  
39 425 step as these can be used by HCPs and industry alike to help promote evidence-based  
40  
41 426 practice in personalized nutrition. Ideally, industry should use future clinical practice  
42  
43 427 guidelines to inform the nutrigenetic associations and related dietary recommendations  
44  
45 428 included in their reports. Decision aids can also be useful to guide clinical practice for  
46  
47 429 HCPs (149), and future research should seek to develop a decision aid related to omega-  
48  
49 430 3s and lipid/lipoprotein outcomes based on genetic variation.  
50  
51  
52

53 431  
54  
55  
56  
57  
58  
59  
60

1  
2  
3 432 Overall, we have provided a comprehensive overview the body of evidence related to  
4  
5 433 nutrigenetics, omega-3s and plasma lipids/lipoproteins/apolipoproteins, while providing  
6  
7 434 an overview of levels of evidence in this field. To our knowledge, this is the first  
8  
9 435 systematic review with evidence grading in the broader field of nutrigenetics. The results  
10  
11 436 of this work should be used in clinical practice guideline development, to ultimately  
12  
13 437 guide evidence-based practice in personalized nutrition and move this emerging field  
14  
15 438 forward.  
16  
17  
18

19 439  
20 440 **Sources of Support:** J.R.H. received postdoctoral fellowships from the Canadian Institute of  
21 441 Health Research, NUTRISS and INAF. I.R. holds a Junior 2 research Scholar from the Fonds de  
22 442 recherche du Québec—Santé (FRQ-S). M-C.V. holds a Tier 1 Canada Research Chair in  
23 443 Nutrition Applied to Genetics and Metabolic Health.  
24 444

25 445 **Contributorship Statements:** M-C.V. and J.R.H. conceptualized the review. G.S. was responsible  
26 446 for the search strategy, in collaboration with J.R.H, M-C.V., S.D. and V.G. J.R.H and V.G. were  
27 447 responsible for article screening and selection, summarizing, evidence grading, and developing a  
28 448 draft of the CPGs. The first CPG draft underwent revisions from S.D. and M-C.V. Following this,  
29 449 all authors reviewed and revised the CPGs as well as the full-text manuscript. J.R.H. wrote the first  
30 450 draft of the manuscript. All authors reviewed, revised and approved the final manuscript.  
31 451  
32  
33  
34  
35  
36  
37  
38

39 451 **Competing Interests:** The authors have no competing interests to declare.  
40  
41

42 452 **Funding:** This project was supported through a pilot projects grant from INAF. J.R. Horne was  
43 453 supported through postdoctoral fellowships from CIHR (#430907), NUTRISS and INAF. M-C  
44 454 Vohl holds a Canada Research Chair in Genomics Applied to Nutrition and Metabolic Health.  
45  
46  
47  
48

49 455 **Data Sharing Statement:** Data are available upon reasonable request.  
50  
51  
52  
53  
54  
55  
56  
57  
58  
59  
60

1  
2  
3  
4  
5  
6  
7  
8  
9  
10  
11  
12  
13  
14  
15  
16  
17  
18  
19  
20  
21  
22  
23  
24  
25  
26  
27  
28  
29  
30  
31  
32  
33  
34  
35  
36  
37  
38  
39  
40  
41  
42  
43  
44  
45  
46  
47  
48  
49  
50  
51  
52  
53  
54  
55  
56  
57  
58  
59  
60

458 **Figure Legend:**

459

460 **Figure 1. PRISMA Flow Diagram**

461 \*The original PRISMA Flow Diagram indicated the number of studies included in meta-analysis in this  
462 box. This has been revised for the purposes of this research

For peer review only

## References

1. Barquera S, Pedroza-Tobias A, Medina C, Hernandez-Barrera L, Bibbins-Domingo K, Lozano R, et al. Global overview of the epidemiology of atherosclerotic cardiovascular disease. *Arch Med Res*. 2015;46:328–38.
2. Rudkowska I, Guénard F, Julien P, Couture P, Lemieux S, Barbier O, et al. Genome-wide association study of the plasma triglyceride response to an n-3 polyunsaturated fatty acid supplementation. *J Lipid Res*. 2014 Jul;55(7):1245–53.
3. Rizzi F, Conti C, Dogliotti E, Terranegra A, Salvi E, Braga D, et al. Interaction between polyphenols intake and PON1 gene variants on markers of cardiovascular disease: a nutrigenetic observational study. *Journal of Translational Medicine*. 2016;14:186.
4. Vallée Marcotte B, Cormier V, Garneau V, Robitaille J, Desroches S, Vohl M-C. Nutrigenetic Testing for Personalized Nutrition: An Evaluation of Public Perceptions, Attitudes, and Concerns in a Population of French Canadians. *Lifestyle Genomics* [Internet]. 2019; Available from: <https://doi.org/10.1159/000499626>
5. Vallée Marcotte B, Cormier H, Garneau V, Robitaille J, Desroches S, Vohl M-C. Current knowledge and interest of French Canadians regarding nutrigenetics. *Genes Nutr*. 2019 Dec;14(1):5.
6. Caulfield T, McGuire AL. Direct-to-Consumer Genetic Testing: Perceptions, Problems, and Policy Responses. *Annu Rev Med*. 2012;63(1):23–33.
7. Horne J, Gilliland J, Madill J, Shelley J. A critical examination of legal and ethical considerations for nutrigenetic testing with recommendations for improving regulation in Canada: From science to consumer. *J Law Biosci*. 2020;
8. Görman U, Mathers JC, Grimaldi KA, Ahlgren J, Nordström K. Do we know enough? A scientific and ethical analysis of the basis for genetic-based personalized nutrition. *Genes Nutr*. 2013 Jul;8(4):373–81.
9. Brouwers MC, Kho ME, Browman GP, Burgers JS, Cluzeau F, Feder G, et al. AGREE II: advancing guideline development, reporting and evaluation in health care. *Can Med Assoc J*. 2010 Dec 14;182(18):E839–42.
10. Harris WS. Stearidonic acid as a “pro-eicosapentaenoic acid.” *Curr Opin Lipidol*. 2012 Feb;23(1):30–4.
11. Shahidi F, Ambigaipalan P. Omega-3 Polyunsaturated Fatty Acids and Their Health Benefits. *Annu Rev Food Sci Technol*. 2018 25;9:345–81.
12. Hu Y, Hu FB, Manson JE. Marine Omega-3 Supplementation and Cardiovascular Disease: An Updated Meta-Analysis of 13 Randomized Controlled Trials Involving 127 477 Participants. *J Am Heart Assoc*. 2019;8(19):e013543.

13. Abdelhamid AS, Brown TJ, Brainard JS, Biswas P, Thorpe GC, Moore HJ, et al. Omega-3 fatty acids for the primary and secondary prevention of cardiovascular disease. *Cochrane Database Syst Rev* [Internet]. 2018 Jul 18 [cited 2020 Dec 1];2018(7). Available from: <https://www.ncbi.nlm.nih.gov/pmc/articles/PMC6513557/>
14. Jones PJH, Senanayake VK, Pu S, Jenkins DJA, Connelly PW, Lamarche B, et al. DHA-enriched high-oleic acid canola oil improves lipid profile and lowers predicted cardiovascular disease risk in the canola oil multicenter randomized controlled trial. *Am J Clin Nutr*. 2014 Jul;100(1):88–97.
15. Ballantyne CM, Bays HE, Kastelein JJ, Stein E, Isaacsohn JL, Braeckman RA, et al. Efficacy and Safety of Eicosapentaenoic Acid Ethyl Ester (AMR101) Therapy in Statin-Treated Patients With Persistent High Triglycerides (from the ANCHOR Study). *Am J Cardiol*. 2012 Oct 1;110(7):984–92.
16. Davidson MH, Stein EA, Bays HE, Maki KC, Doyle RT, Shalwitz RA, et al. Efficacy and tolerability of adding prescription omega-3 fatty acids 4 g/d to simvastatin 40 mg/d in hypertriglyceridemic patients: an 8-week, randomized, double-blind, placebo-controlled study. *Clin Ther*. 2007 Jul;29(7):1354–67.
17. Bradberry JC, Hilleman DE. Overview of Omega-3 Fatty Acid Therapies. *Pharm Ther*. 2013 Nov;38(11):681–91.
18. Skulas-Ray AC, Alaupovic P, Kris-Etherton PM, West SG. Dose-response effects of marine omega-3 fatty acids on apolipoproteins, apolipoprotein-defined lipoprotein subclasses, and Lp-PLA2 in individuals with moderate hypertriglyceridemia. *J Clin Lipidol*. 2015 Jun;9(3):360–7.
19. Lee MW, Park JK, Hong JW, Kim KJ, Shin DY, Ahn CW, et al. Beneficial Effects of Omega-3 Fatty Acids on Low Density Lipoprotein Particle Size in Patients with Type 2 Diabetes Already under Statin Therapy. *Diabetes Metab J*. 2013 Jun;37(3):207–11.
20. Bouwens M, van de Rest O, Dellschaft N, Bromhaar MG, de Groot LCPGM, Geleijnse JM, et al. Fish-oil supplementation induces antiinflammatory gene expression profiles in human blood mononuclear cells. *Am J Clin Nutr*. 2009 Aug;90(2):415–24.
21. Rudkowska I, Paradis A-M, Thifault E, Julien P, Tchernof A, Couture P, et al. Transcriptomic and metabolomic signatures of an n-3 polyunsaturated fatty acids supplementation in a normolipidemic/normocholesterolemic Caucasian population. *J Nutr Biochem*. 2013 Jan;24(1):54–61.
22. Merched AJ, Chan L. Nutrigenetics and Nutrigenomics of Atherosclerosis. *Curr Atheroscler Rep*. 2013 Jun;15(6):328.
23. Madden J, Williams CM, Calder PC, Lietz G, Miles EA, Cordell H, et al. The impact of common gene variants on the response of biomarkers of cardiovascular disease (CVD) risk to increased fish oil fatty acids intakes. *Annu Rev Nutr*. 2011 Aug 21;31:203–34.
24. Cave C, Hein N, Smith LM, Anderson-Berry A, Richter CK, Bisselou KS, et al. Omega-3 Long-Chain Polyunsaturated Fatty Acids Intake by Ethnicity, Income, and Education Level in the United States: NHANES 2003–2014. *Nutrients* [Internet]. 2020 Jul 9 [cited

- 2020 Oct 27];12(7). Available from:  
<https://www.ncbi.nlm.nih.gov/pmc/articles/PMC7400855/>
25. World Health Organization. Joint FAO/WHO Expert Consultation on Fats and Fatty Acids in Human Nutrition [Internet]. 2008. Available from:  
[http://www.who.int/nutrition/topics/FFA\\_interim\\_recommendations/en/](http://www.who.int/nutrition/topics/FFA_interim_recommendations/en/)
  26. Fats and Fatty Acids in Human Nutrition | Karger Book [Internet]. [cited 2021 Jan 14]. Available from: <https://www.karger.com/Book/Home/251867>
  27. Horne J, Madill J, O'Connor C, Shelley J, Gilliland J. A Systematic Review of Genetic Testing and Lifestyle Behaviour Change: Are We Using High-Quality Genetic Interventions and Considering Behaviour Change Theory? *Lifestyle Genomics*. 2018;11(1):49–63.
  28. Corella D, Ordovás JM. Interactions between dietary *n-3* fatty acids and genetic variants and risk of disease. *Br J Nutr*. 2012 Jun;107(S2):S271–83.
  29. Grimaldi KA, van Ommen B, Ordovas JM, Parnell LD, Mathers JC, Bendik I, et al. Proposed guidelines to evaluate scientific validity and evidence for genotype-based dietary advice. *Genes Nutr*. 2017 Dec;12(1):35.
  30. Khan KS, Kunz R, Kleijnen J, Antes G. Five steps to conducting a systematic review. *J R Soc Med*. 2003 Mar;96(3):118–21.
  31. PRISMA. PRISMA: Transparent reporting of systematic reviews and meta-analyses [Internet]. 2015. Available from: <http://www.prisma-statement.org/>
  32. Pollock A, Berge E. How to do a systematic review. *Int J Stroke*. 2018 Feb 1;13(2):138–56.
  33. Dekkers OM, Vandembroucke JP, Cevallos M, Renahan AG, Altman DG, Egger M. COSMOS-E: Guidance on conducting systematic reviews and meta-analyses of observational studies of etiology. *PLoS Med* [Internet]. 2019 Feb 21 [cited 2020 Apr 9];16(2). Available from: <https://www.ncbi.nlm.nih.gov/pmc/articles/PMC6383865/>
  34. Corella D, Ordovás JM. Interactions between dietary *n-3* fatty acids and genetic variants and risk of disease. *Br J Nutr*. 2012 Jun;107(0 2):S271–83.
  35. GRADE handbook [Internet]. [cited 2020 Sep 29]. Available from:  
<https://gdt.gradepro.org/app/handbook/handbook.html>
  36. SNiPA - a single nucleotide polymorphisms annotator and browser [Internet]. [cited 2020 Aug 20]. Available from: [https://snipa.helmholtz-muenchen.de/snipa3/index.php?task=proxy\\_search](https://snipa.helmholtz-muenchen.de/snipa3/index.php?task=proxy_search)
  37. GRADE handbook [Internet]. [cited 2020 Apr 3]. Available from:  
<https://gdt.gradepro.org/app/handbook/handbook.html#h.dce0ghnajwsm>



- 1  
2  
3  
4  
5  
6  
7  
8  
9  
10  
11  
12  
13  
14  
15  
16  
17  
18  
19  
20  
21  
22  
23  
24  
25  
26  
27  
28  
29  
30  
31  
32  
33  
34  
35  
36  
37  
38  
39  
40  
41  
42  
43  
44  
45  
46  
47  
48  
49  
50  
51  
52  
53  
54  
55  
56  
57  
58  
59  
60
38. Murad MH, Mustafa RA, Schünemann HJ, Sultan S, Santesso N. Rating the certainty in evidence in the absence of a single estimate of effect. *Evid Based Med*. 2017 Jun;22(3):85–7.
  39. Ma L-L, Wang Y-Y, Yang Z-H, Huang D, Weng H, Zeng X-T. Methodological quality (risk of bias) assessment tools for primary and secondary medical studies: what are they and which is better? *Mil Med Res* [Internet]. 2020 Feb 29 [cited 2020 Sep 2];7. Available from: <https://www.ncbi.nlm.nih.gov/pmc/articles/PMC7049186/>
  40. Chen Y, Estampador AC, Keller M, Poveda A, Dalla-Riva J, Johansson I, et al. The combined effects of FADS gene variation and dietary fats in obesity-related traits in a population from the far north of Sweden: the GLACIER Study. *Int J Obes*. 2019 Apr;43(4):808–20.
  41. Ching YK, Chin YS, Appukutty M, Ramanchadran V, Yu CY, Ang GY, et al. Interaction of Dietary Linoleic Acid and  $\alpha$ -Linolenic Acids with rs174547 in FADS1 Gene on Metabolic Syndrome Components among Vegetarians. *Nutrients*. 2019 Jul 23;11(7):1686.
  42. Dumont J, Huybrechts I, Spinneker A, Gottrand F, Grammatikaki E, Bevilacqua N, et al. FADS1 genetic variability interacts with dietary  $\alpha$ -linolenic acid intake to affect serum non-HDL-cholesterol concentrations in European adolescents. *J Nutr*. 2011 Jul;141(7):1247–53.
  43. Dumont J, Goumidi L, Grenier-Boley B, Cottel D, Marécaux N, Montaye M, et al. Dietary linoleic acid interacts with FADS1 genetic variability to modulate HDL-cholesterol and obesity-related traits. *Clin Nutr*. 2018 Oct 1;37(5):1683–9.
  44. Hellstrand S, Sonestedt E, Ericson U, Gullberg B, Wirfält E, Hedblad B, et al. Intake levels of dietary long-chain PUFAs modify the association between genetic variation in FADS and LDL-C. *J Lipid Res*. 2012 Jun;53(6):1183–9.
  45. Lu Y, Feskens EJ, Dollé ME, Imholz S, Verschuren WM, Müller M, et al. Dietary n-3 and n-6 polyunsaturated fatty acid intake interacts with FADS1 genetic variation to affect total and HDL-cholesterol concentrations in the Doetinchem Cohort Study. *Am J Clin Nutr*. 2010 Jul 1;92(1):258–65.
  46. Standl M, Lattka E, Stach B, Koletzko S, Bauer C-P, von Berg A, et al. FADS1 FADS2 Gene Cluster, PUFA Intake and Blood Lipids in Children: Results from the GINIplus and LISAPLUS Studies. *PLoS ONE* [Internet]. 2012 May 21 [cited 2020 Aug 3];7(5). Available from: <https://www.ncbi.nlm.nih.gov/pmc/articles/PMC3357401/>
  47. Fontaine-Bisson B, Wolever TMS, Chiasson J-L, Rabasa-Lhoret R, Maheux P, Josse RG, et al. Genetic polymorphisms of tumor necrosis factor- $\alpha$  modify the association between dietary polyunsaturated fatty acids and fasting HDL-cholesterol and apo A-I concentrations. *Am J Clin Nutr*. 2007 Sep;86(3):768–74.
  48. Joffe YT, van der Merwe L, Carstens M, Collins M, Jennings C, Levitt NS, et al. Tumor Necrosis Factor- $\alpha$  Gene -308 G/A Polymorphism Modulates the Relationship between Dietary Fat Intake, Serum Lipids, and Obesity Risk in Black South African Women. *J Nutr*. 2010 May 1;140(5):901–7.

- 1  
2  
3  
4  
5  
6  
7  
8  
9  
10  
11  
12  
13  
14  
15  
16  
17  
18  
19  
20  
21  
22  
23  
24  
25  
26  
27  
28  
29  
30  
31  
32  
33  
34  
35  
36  
37  
38  
39  
40  
41  
42  
43  
44  
45  
46  
47  
48  
49  
50  
51  
52  
53  
54  
55  
56  
57  
58  
59  
60
49. Joffe YT, van der Merwe L, Evans J, Collins M, Lambert EV, September A, et al. The tumor necrosis factor- $\alpha$  gene -238 G>A polymorphism, dietary fat intake, obesity risk and serum lipid concentrations in black and white South African women. *Eur J Clin Nutr.* 2012 Dec;66(12):1295–302.
  50. Tai ES, Corella D, Demissie S, Cupples LA, Coltell O, Schaefer EJ, et al. Polyunsaturated Fatty Acids Interact with the PPARA-L162V Polymorphism to Affect Plasma Triglyceride and Apolipoprotein C-III Concentrations in the Framingham Heart Study. *J Nutr.* 2005 Mar 1;135(3):397–403.
  51. Volcik KA, Nettleton JA, Ballantyne CM, Boerwinkle E. Peroxisome proliferator-activated receptor [alpha] genetic variation interacts with n-6 and long-chain n-3 fatty acid intake to affect total cholesterol and LDL-cholesterol concentrations in the Atherosclerosis Risk in Communities Study. *Am J Clin Nutr.* 2008 Jun;87(6):1926–31.
  52. Bouchard-Mercier A, Godin G, Lamarche B, Pérusse L, Vohl M-C. Effects of Peroxisome Proliferator-Activated Receptors, Dietary Fat Intakes and Gene–Diet Interactions on Peak Particle Diameters of Low-Density Lipoproteins. *J Nutr Nutr.* 2011;4(1):36–48.
  53. Fallaize R, Celis-Morales C, Macready AL, Marsaux CF, Forster H, O'Donovan C, et al. The effect of the apolipoprotein E genotype on response to personalized dietary advice intervention: findings from the Food4Me randomized controlled trial. *Am J Clin Nutr.* 2016 Sep;104(3):827–36.
  54. Fontaine-Bisson B, Wolever TMS, Connelly PW, Corey PN, El-Sohemy A. NF- $\kappa$ B -94Ins/Del ATTG polymorphism modifies the association between dietary polyunsaturated fatty acids and HDL-cholesterol in two distinct populations. *Atherosclerosis.* 2009 Jun;204(2):465–70.
  55. Hosseini-Esfahani F, Mirmiran P, Koochakpoor G, Daneshpour MS, Guity K, Azizi F. Some dietary factors can modulate the effect of the zinc transporters 8 polymorphism on the risk of metabolic syndrome. *Sci Rep.* 2017 Dec;7(1):1649.
  56. Jang HB, Hwang J-Y, Park JE, Oh JH, Ahn Y, Kang J-H, et al. Intake levels of dietary polyunsaturated fatty acids modify the association between the genetic variation in *PCSK5* and HDL cholesterol. *J Med Genet.* 2014 Dec;51(12):782–8.
  57. Lai C-Q, Corella D, Demissie S, Cupples LA, Adiconis X, Zhu Y, et al. Dietary Intake of n-6 Fatty Acids Modulates Effect of Apolipoprotein A5 Gene on Plasma Fasting Triglycerides, Remnant Lipoprotein Concentrations, and Lipoprotein Particle Size: The Framingham Heart Study. *Circulation.* 2006 May 2;113(17):2062–70.
  58. Richardson K, Louie-Gao Q, Arnett DK, Parnell LD, Lai C-Q, Davalos A, et al. The *PLIN4* Variant rs8887 Modulates Obesity Related Phenotypes in Humans through Creation of a Novel miR-522 Seed Site. Mailund T, editor. *PLoS ONE.* 2011 Apr 20;6(4):e17944.
  59. Warodomwicht D, Arnett DK, Kabagambe EK, Tsai MY, Hixson JE, Straka RJ, et al. Polyunsaturated Fatty Acids Modulate the Effect of *TCF7L2* Gene Variants on Postprandial Lipemia. *J Nutr.* 2009 Mar 1;139(3):439–46.

- 1  
2  
3  
4  
5  
6  
7  
8  
9  
10  
11  
12  
13  
14  
15  
16  
17  
18  
19  
20  
21  
22  
23  
24  
25  
26  
27  
28  
29  
30  
31  
32  
33  
34  
35  
36  
37  
38  
39  
40  
41  
42  
43  
44  
45  
46  
47  
48  
49  
50  
51  
52  
53  
54  
55  
56  
57  
58  
59  
60
60. AlSaleh A, Maniou Z, Lewis FJ, Hall WL, Sanders TAB, O'Dell SD. Genetic predisposition scores for dyslipidaemia influence plasma lipid concentrations at baseline, but not the changes after controlled intake of n-3 polyunsaturated fatty acids. *Genes Nutr.* 2014 Jul;9(4):412.
  61. Harsløf LBS, Damsgaard CT, Hellgren LI, Andersen AD, Vogel U, Lauritzen L. Effects on metabolic markers are modified by PPARG2 and COX2 polymorphisms in infants randomized to fish oil. *Genes Nutr.* 2014 May;9(3):396.
  62. Rudkowska I, Guénard F, Julien P, Couture P, Lemieux S, Barbier O, et al. Genome-wide association study of the plasma triglyceride response to an n-3 polyunsaturated fatty acid supplementation. *J Lipid Res.* 2014 Jul;55(7):1245–53.
  63. Vallée Marcotte B, Guénard F, Cormier H, Lemieux S, Couture P, Rudkowska I, et al. Plasma Triglyceride Levels May Be Modulated by Gene Expression of IQCJ, NXP1, PHF17 and MYB in Humans. *Int J Mol Sci.* 2017 Jan 26;18(2).
  64. Vallée Marcotte B, Guénard F, Lemieux S, Couture P, Rudkowska I, Calder PC, et al. Fine mapping of genome-wide association study signals to identify genetic markers of the plasma triglyceride response to an omega-3 fatty acid supplementation. *Am J Clin Nutr.* 2019 Jan 1;109(1):176–85.
  65. Vallée Marcotte B, Allaire J, Guénard F, de Toro-Martín J, Couture P, Lamarche B, et al. Genetic risk prediction of the plasma triglyceride response to independent supplementations with eicosapentaenoic and docosahexaenoic acids: the ComparED Study. *Genes Nutr.* 2020 Dec;15(1):10.
  66. Zheng J-S, Chen J, Wang L, Yang H, Fang L, Yu Y, et al. Replication of a Gene-Diet Interaction at CD36, NOS3 and PPARG in Response to Omega-3 Fatty Acid Supplements on Blood Lipids: A Double-Blind Randomized Controlled Trial. *EBioMedicine.* 2018 May;31:150–6.
  67. Vallée Marcotte B, Guénard F, Marquis J, Charpagne A, Vadillo-Ortega F, Tejero M, et al. Genetic Risk Score Predictive of the Plasma Triglyceride Response to an Omega-3 Fatty Acid Supplementation in a Mexican Population. *Nutrients.* 2019 Mar 29;11(4):737.
  68. Roke K, Mutch DM. The Role of FADS1/2 Polymorphisms on Cardiometabolic Markers and Fatty Acid Profiles in Young Adults Consuming Fish Oil Supplements. *Nutrients.* 2014 Jun 16;6(6):2290–304.
  69. Cormier H, Rudkowska I, Paradis A-M, Thifault E, Garneau V, Lemieux S, et al. Association between Polymorphisms in the Fatty Acid Desaturase Gene Cluster and the Plasma Triacylglycerol Response to an n-3 PUFA Supplementation. *Nutrients.* 2012 Aug 17;4(8):1026–41.
  70. AbuMweis SS, Panchal SK, Jones PJH. Triacylglycerol-Lowering Effect of Docosahexaenoic Acid Is Not Influenced by Single-Nucleotide Polymorphisms Involved in Lipid Metabolism in Humans. *Lipids.* 2018;53(9):897–908.

- 1  
2  
3  
4  
5  
6  
7  
8  
9  
10  
11  
12  
13  
14  
15  
16  
17  
18  
19  
20  
21  
22  
23  
24  
25  
26  
27  
28  
29  
30  
31  
32  
33  
34  
35  
36  
37  
38  
39  
40  
41  
42  
43  
44  
45  
46  
47  
48  
49  
50  
51  
52  
53  
54  
55  
56  
57  
58  
59  
60
71. Carvalho-Wells AL, Jackson KG, Lockyer S, Lovegrove JA, Minihane AM. APOE genotype influences triglyceride and C-reactive protein responses to altered dietary fat intake in UK adults. *Am J Clin Nutr.* 2012 Dec 1;96(6):1447–53.
  72. Caslake MJ, Miles EA, Kofler BM, Lietz G, Curtis P, Armah CK, et al. Effect of sex and genotype on cardiovascular biomarker response to fish oils: the FINGEN Study. *Am J Clin Nutr.* 2008 Sep 1;88(3):618–29.
  73. Dang TM, Conway V, Plourde M. Disrupted fatty acid distribution in HDL and LDL according to apolipoprotein E allele. *Nutrition.* 2015 Jun 1;31(6):807–12.
  74. Jackson KG, Lockyer S, Carvalho-Wells AL, Williams CM, Minihane AM, Lovegrove JA. Dietary fat manipulation has a greater impact on postprandial lipid metabolism than the apolipoprotein E (epsilon) genotype—insights from the SATgenε study. *Mol Nutr Food Res.* 2012;56(12):1761–70.
  75. Jackson KG, Lockyer S, Carvalho-Wells AL, Williams CM, Minihane AM, Lovegrove JA. *Apolipoprotein E (epsilon) genotype has a greater impact on apoB-48 than apoB-100 responses to dietary fat manipulation—insights from the SATgenε study.* *Mol Nutr Food Res.* 2017 Apr;61(4):1600688.
  76. Minihane AM, Khan S, Leigh-Firbank EC, Talmud P, Wright JW, Murphy MC, et al. ApoE Polymorphism and Fish Oil Supplementation in Subjects With an Atherogenic Lipoprotein Phenotype. *Arterioscler Thromb Vasc Biol.* 2000 Aug;20(8):1990–7.
  77. Olano-Martin E, Anil E, Caslake MJ, Packard CJ, Bedford D, Stewart G, et al. Contribution of apolipoprotein E genotype and docosahexaenoic acid to the LDL-cholesterol response to fish oil. *Atherosclerosis.* 2010 Mar;209(1):104–10.
  78. Paschos GK, Yiannakouris N, Rallidis LS, Davies I, Griffin BA, Panagiotakos DB, et al. Apolipoprotein E Genotype in Dyslipidemic Patients and Response of Blood Lipids and Inflammatory Markers to Alpha-Linolenic Acid. *Angiology.* 2005 Jan 1;56(1):49–60.
  79. Thifault E, Cormier H, Bouchard-Mercier A, Rudkowska I, Paradis A-M, Garneau V, et al. Effects of Age, Sex, Body Mass Index and APOE Genotype on Cardiovascular Biomarker Response to an n-3 Polyunsaturated Fatty Acid Supplementation. *J Nutr Nutr.* 2013;6(2):73–82.
  80. Madden J, Carrero J, Brunner A, Dastur N, Shearman C, Calder P, et al. Polymorphisms in the CD36 gene modulate the ability of fish oil supplements to lower fasting plasma triacyl glycerol and raise HDL cholesterol concentrations in healthy middle-aged men. *Prostaglandins, Leukotrienes and Essential Fatty Acids.* 2008;78:327–35.
  81. Dawczynski C, Massey KA, Ness C, Kiehntopf M, Stepanow S, Platzer M, et al. Randomized placebo-controlled intervention with n-3 LC-PUFA-supplemented yoghurt: Effects on circulating eicosanoids and cardiovascular risk factors. *Clin Nutr.* 2013 Oct 1;32(5):686–96.
  82. Binia A, Vargas-Martínez C, Ancira-Moreno M, Gosoniu LM, Montoliu I, Gámez-Valdez E, et al. Improvement of cardiometabolic markers after fish oil intervention in young

- 1  
2  
3 Mexican adults and the role of PPAR $\alpha$  L162V and PPAR $\gamma$ 2 P12A. *J Nutr Biochem*. 2017  
4 May;43:98–106.  
5
- 6  
7 83. Itariu BK, Zeyda M, Hochbrugger EE, Neuhofer A, Prager G, Schindler K, et al. Long-chain  
8 n–3 PUFAs reduce adipose tissue and systemic inflammation in severely obese  
9 nondiabetic patients: a randomized controlled trial. *Am J Clin Nutr*. 2012 Nov  
10 1;96(5):1137–49.  
11
- 12 84. Lindi V, Schwab U, Louheranta A, Laakso M, Vessby B, Hermansen K, et al. Impact of the  
13 Pro12Ala polymorphism of the PPAR- $\gamma$ 2 gene on serum triacylglycerol response to n–3  
14 fatty acid supplementation. *Mol Genet Metab*. 2003 May;79(1):52–60.  
15
- 16 85. Pishva H, Mehdipour P, Eshraghian MR, Mahboob S-A. Effects of Eicosapentaenoic Acid  
17 Supplementation on Lipid and Lipoprotein Profile in Hypertriglyceridemic Subjects  
18 with Different Proliferator-activated Receptor Alpha Genotypes. :13.  
19
- 20 86. Caron-Dorval D, Paquet P, Paradis A-M, Rudkowska I, Lemieux S, Couture P, et al. Effect  
21 of the PPAR-Alpha L162V Polymorphism on the Cardiovascular Disease Risk Factor in  
22 Response to n–3 Polyunsaturated Fatty Acids. *J Nutr Nutr*. 2008;1(4):205–12.  
23
- 24 87. Binia A, Vargas-Martínez C, Ancira-Moreno M, Gosoni LM, Montoliu I, Gámez-Valdez E,  
25 et al. Improvement of cardiometabolic markers after fish oil intervention in young  
26 Mexican adults and the role of PPAR $\alpha$  L162V and PPAR $\gamma$ 2 P12A. *J Nutr Biochem*. 2017  
27 May;43:98–106.  
28
- 29 88. Bouchard-Mercier A, Godin G, Lamarche B, Pérusse L, Vohl M-C. Effects of Peroxisome  
30 Proliferator-Activated Receptors, Dietary Fat Intakes and Gene–Diet Interactions on  
31 Peak Particle Diameters of Low-Density Lipoproteins. *J Nutr Nutr*. 2011;4(1):36–48.  
32
- 33 89. Bodhini D, Gaal S, Shatwan I, Ramya K, Ellahi B, Surendran S, et al. Interaction between  
34 TCF7L2 polymorphism and dietary fat intake on high density lipoprotein cholesterol. Li  
35 S, editor. *PLOS ONE*. 2017 Nov 28;12(11):e0188382.  
36  
37
- 38 90. Ching YK, Chin YS, Appukutty M, Ramanchadran V, Yu CY, Ang GY, et al. Interaction of  
39 Dietary Linoleic Acid and  $\alpha$ -Linolenic Acids with rs174547 in FADS1 Gene on Metabolic  
40 Syndrome Components among Vegetarians. *Nutrients*. 2019 Jul;11(7):1686.  
41
- 42 91. Fontaine-Bisson B, El-Sohemy A. Genetic polymorphisms of tumor necrosis factor-alpha  
43 modify the association between dietary polyunsaturated fatty acids and plasma high-  
44 density lipoprotein-cholesterol concentrations in a population of young adults. *J Nutr*  
45 *Nutr*. 2008;1(5):215–23.  
46
- 47 92. Fontaine-Bisson B, Wolever TMS, Connelly PW, Corey PN, El-Sohemy A. NF- $\kappa$ B  
48 –94Ins/Del ATTG polymorphism modifies the association between dietary  
49 polyunsaturated fatty acids and HDL-cholesterol in two distinct populations.  
50 *Atherosclerosis*. 2009 Jun;204(2):465–70.  
51
- 52 93. Hellstrand S, Sonestedt E, Ericson U, Gullberg B, Wirfält E, Hedblad B, et al. Intake levels  
53 of dietary long-chain PUFAs modify the association between genetic variation in FADS  
54 and LDL-C. *J Lipid Res*. 2012 Jun;53(6):1183–9.  
55  
56  
57  
58  
59

- 1  
2  
3  
4  
5  
6  
7  
8  
9  
10  
11  
12  
13  
14  
15  
16  
17  
18  
19  
20  
21  
22  
23  
24  
25  
26  
27  
28  
29  
30  
31  
32  
33  
34  
35  
36  
37  
38  
39  
40  
41  
42  
43  
44  
45  
46  
47  
48  
49  
50  
51  
52  
53  
54  
55  
56  
57  
58  
59  
60
94. Hosseini-Esfahani F, Mirmiran P, Koochakpoor G, Daneshpour MS, Guity K, Azizi F. Some dietary factors can modulate the effect of the zinc transporters 8 polymorphism on the risk of metabolic syndrome. *Sci Rep*. 2017 Dec;7(1):1649.
  95. Jang HB, Hwang J-Y, Park JE, Oh JH, Ahn Y, Kang J-H, et al. Intake levels of dietary polyunsaturated fatty acids modify the association between the genetic variation in *PCSK5* and HDL cholesterol. *J Med Genet*. 2014 Dec;51(12):782–8.
  96. Joffe YT, van der Merwe L, Carstens M, Collins M, Jennings C, Levitt NS, et al. Tumor Necrosis Factor- $\alpha$  Gene -308 G/A Polymorphism Modulates the Relationship between Dietary Fat Intake, Serum Lipids, and Obesity Risk in Black South African Women. *J Nutr*. 2010 May 1;140(5):901–7.
  97. Joffe YT, van der Merwe L, Evans J, Collins M, Lambert EV, September A, et al. The tumor necrosis factor- $\alpha$  gene -238 G>A polymorphism, dietary fat intake, obesity risk and serum lipid concentrations in black and white South African women. *Eur J Clin Nutr*. 2012 Dec;66(12):1295–302.
  98. Joffe YT, van der Merwe L, Evans J, Collins M, Lambert EV, September A, et al. Interleukin-6 Gene Polymorphisms, Dietary Fat Intake, Obesity and Serum Lipid Concentrations in Black and White South African Women. *Nutrients*. 2014 Jun 24;6(6):2436–65.
  99. Lai Chao-Qiang, Corella Dolores, Demissie Serkalem, Cupples L. Adrienne, Adiconis Xian, Zhu Yueping, et al. Dietary Intake of n-6 Fatty Acids Modulates Effect of Apolipoprotein A5 Gene on Plasma Fasting Triglycerides, Remnant Lipoprotein Concentrations, and Lipoprotein Particle Size. *Circulation*. 2006 May 2;113(17):2062–70.
  100. Lu Y, Feskens EJ, Dollé ME, Imholz S, Verschuren WM, Müller M, et al. Dietary n-3 and n-6 polyunsaturated fatty acid intake interacts with *FADS1* genetic variation to affect total and HDL-cholesterol concentrations in the Doetinchem Cohort Study. *Am J Clin Nutr*. 2010 Jul 1;92(1):258–65.
  101. Nettleton JA, Volcik KA, Hoogeveen RC, Boerwinkle E. Carbohydrate intake modifies associations between *ANGPTL4*[E40K] genotype and HDL-cholesterol concentrations in White men from the Atherosclerosis Risk in Communities (ARIC) study. *Atherosclerosis*. 2009 Mar;203(1):214–20.
  102. Richardson K, Louie-Gao Q, Arnett DK, Parnell LD, Lai C-Q, Davalos A, et al. The *PLIN4* Variant rs8887 Modulates Obesity Related Phenotypes in Humans through Creation of a Novel miR-522 Seed Site. *PLOS ONE*. 2011 Apr 20;6(4):e17944.
  103. Tai ES, Corella D, Demissie S, Cupples LA, Coltell O, Schaefer EJ, et al. Polyunsaturated Fatty Acids Interact with the *PPARA*-L162V Polymorphism to Affect Plasma Triglyceride and Apolipoprotein C-III Concentrations in the Framingham Heart Study. *J Nutr*. 2005 Mar 1;135(3):397–403.
  104. Volcik KA, Nettleton JA, Ballantyne CM, Boerwinkle E. Peroxisome proliferator-activated receptor alpha genetic variation interacts with n-6 and long-chain n-3 fatty

- acid intake to affect total cholesterol and LDL-cholesterol concentrations in the Atherosclerosis Risk in Communities Study. *Am J Clin Nutr.* 2008;87:1926–31.
105. Warodomwichit D, Arnett DK, Kabagambe EK, Tsai MY, Hixson JE, Straka RJ, et al. Polyunsaturated Fatty Acids Modulate the Effect of TCF7L2 Gene Variants on Postprandial Lipemia. *J Nutr.* 2009 Mar 1;139(3):439–46.
106. AlSaleh A, Maniou Z, Lewis FJ, Hall WL, Sanders TAB, O'Dell SD. Genetic predisposition scores for dyslipidaemia influence plasma lipid concentrations at baseline, but not the changes after controlled intake of n-3 polyunsaturated fatty acids. *Genes Nutr.* 2014 Jul;9(4):412.
107. Armstrong P, Kelley DS, Newman JW, Staggers FE, Hartiala J, Allayee H, et al. Arachidonate 5-Lipoxygenase Gene Variants Affect Response to Fish Oil Supplementation by Healthy African Americans. *J Nutr.* 2012 Aug;142(8):1417–28.
108. Bouchard-Mercier A, Rudkowska I, Lemieux S, Couture P, Vohl M-C. Polymorphisms, de novo lipogenesis, and plasma triglyceride response following fish oil supplementation. *J Lipid Res.* 2013 Oct;54(10):2866–73.
109. Bouchard-Mercier A, Rudkowska I, Lemieux S, Couture P, Vohl M-C. Polymorphisms in Genes Involved in Fatty Acid  $\beta$ -Oxidation Interact with Dietary Fat Intakes to Modulate the Plasma TG Response to a Fish Oil Supplementation. *Nutrients.* 2014 Mar 18;6(3):1145–63.
110. Bouchard-Mercier A, Rudkowska I, Lemieux S, Couture P, Vohl M-C. An interaction effect between glucokinase gene variation and carbohydrate intakes modulates the plasma triglyceride response to a fish oil supplementation. *Genes Nutr.* 2014 May;9(3):395.
111. Caron-Dorval D, Paquet P, Paradis A-M, Rudkowska I, Lemieux S, Couture P, et al. Effect of the PPAR-Alpha L162V Polymorphism on the Cardiovascular Disease Risk Factor in Response to n-3 Polyunsaturated Fatty Acids. *J Nutr.* 2008;1(4):205–12.
112. Carvalho-Wells AL, Jackson KG, Lockyer S, Lovegrove JA, Minihane AM. APOE genotype influences triglyceride and C-reactive protein responses to altered dietary fat intake in UK adults. *Am J Clin Nutr.* 2012 Dec 1;96(6):1447–53.
113. Lockyer S, Tzanetou M, Carvalho-Wells AL, Jackson KG, Minihane AM, Lovegrove JA. SAT gene dietary model to implement diets of differing fat composition in prospectively genotyped groups (apoE) using commercially available foods. *Br J Nutr.* 2012 Nov;108(9):1705–13.
114. Caslake MJ, Miles EA, Kofler BM, Lietz G, Curtis P, Armah CK, et al. Effect of sex and genotype on cardiovascular biomarker response to fish oils: the FINGEN Study. *Am J Clin Nutr.* 2008 Sep 1;88(3):618–29.
115. Cormier H, Rudkowska I, Paradis A-M, Thifault E, Garneau V, Lemieux S, et al. Association between Polymorphisms in the Fatty Acid Desaturase Gene Cluster and the Plasma Triacylglycerol Response to an n-3 PUFA Supplementation. *Nutrients.* 2012 Aug;4(8):1026–41.

- 1  
2  
3  
4  
5  
6  
7  
8  
9  
10  
11  
12  
13  
14  
15  
16  
17  
18  
19  
20  
21  
22  
23  
24  
25  
26  
27  
28  
29  
30  
31  
32  
33  
34  
35  
36  
37  
38  
39  
40  
41  
42  
43  
44  
45  
46  
47  
48  
49  
50  
51  
52  
53  
54  
55  
56  
57  
58  
59  
60
116. Ferguson JF, Phillips CM, McMonagle J, Pérez-Martínez P, Shaw DI, Lovegrove JA, et al. NOS3 gene polymorphisms are associated with risk markers of cardiovascular disease, and interact with omega-3 polyunsaturated fatty acids. *Atherosclerosis*. 2010 Aug 1;211(2):539–44.
  117. Jackson KG, Lockyer S, Carvalho-Wells AL, Williams CM, Minihane AM, Lovegrove JA. Apolipoprotein E (epsilon) genotype has a greater impact on apoB-48 than apoB-100 responses to dietary fat manipulation—insights from the SATgene study. *Mol Nutr Food Res*. 2017;61(4):1600688.
  118. Lindman AS, Pedersen JI, Hjerkin EM, Arnesen H, Veierød MB, Ellingsen I, et al. The effects of long-term diet and omega-3 fatty acid supplementation on coagulation factor VII and serum phospholipids with special emphasis on the R353Q polymorphism of the FVII gene. *Thromb Haemost*. 2004 Jun;91(6):1097–104.
  119. Markovic O, O'Reilly G, Fussell Helen M, Turner SJ, Calder PC, Howell WM, et al. Role of single nucleotide polymorphisms of pro-inflammatory cytokine genes in the relationship between serum lipids and inflammatory parameters, and the lipid-lowering effect of fish oil in healthy males. *Clin Nutr*. 2004 Oct 1;23(5):1084–95.
  120. McColley SP, Georgopoulos A, Young LR, Kurzer MS, Redmon JB, Raatz SK. A high-fat diet and the threonine-encoding allele (Thr54) polymorphism of fatty acid-binding protein 2 reduce plasma triglyceride-rich lipoproteins. *Nutr Res*. 2011 Jul 1;31(7):503–8.
  121. Minihane Anne M., Khan Syrah, Leigh-Firbank Elizabeth C., Talmud Philippa, Wright John W., Murphy Margaret C., et al. ApoE Polymorphism and Fish Oil Supplementation in Subjects With an Atherogenic Lipoprotein Phenotype. *Arterioscler Thromb Vasc Biol*. 2000 Aug 1;20(8):1990–7.
  122. Ouellette C, Cormier H, Rudkowska I, Guénard F, Lemieux S, Couture P, et al. Polymorphisms in Genes Involved in the Triglyceride Synthesis Pathway and Marine Omega-3 Polyunsaturated Fatty Acid Supplementation Modulate Plasma Triglyceride Levels. *Lifestyle Genomics*. 2013;6(4–5):268–80.
  123. Ouellette C, Rudkowska I, Lemieux S, Lamarche B, Couture P, Vohl M-C. Gene-diet interactions with polymorphisms of the MGLL gene on plasma low-density lipoprotein cholesterol and size following an omega-3 polyunsaturated fatty acid supplementation: a clinical trial. *Lipids Health Dis*. 2014 May 24;13:86.
  124. Pishva H, Mahboob S-A, Mehdipour P, Eshraghian MR, Mohammadi-Asl J, Hosseini S, et al. Fatty acid-binding protein-2 genotype influences lipid and lipoprotein response to eicosapentaenoic acid supplementation in hypertriglyceridemic subjects. *Nutrition*. 2010 Nov 1;26(11):1117–21.
  125. Pishva H, Mehdipour P, Eshraghian MR, Mahboob S-A. Effects of Eicosapentaenoic Acid Supplementation on Lipid and Lipoprotein Profile in Hypertriglyceridemic Subjects with Different Proliferator-activated Receptor Alpha Genotypes. *Int J Prev Med*. 2014 Mar;5(3):333–40.



- 1  
2  
3  
4  
5  
6  
7  
8  
9  
10  
11  
12  
13  
14  
15  
16  
17  
18  
19  
20  
21  
22  
23  
24  
25  
26  
27  
28  
29  
30  
31  
32  
33  
34  
35  
36  
37  
38  
39  
40  
41  
42  
43  
44  
45  
46  
47  
48  
49  
50  
51  
52  
53  
54  
55  
56  
57  
58  
59  
60
126. Rudkowska I, Julien P, Couture P, Lemieux S, Tchernof A, Barbier O, et al. Cardiometabolic risk factors are influenced by Stearoyl-CoA Desaturase (SCD) –1 gene polymorphisms and n-3 polyunsaturated fatty acid supplementation. *Mol Nutr Food Res*. 2014;58(5):1079–86.
127. Scorletti E, West AL, Bhatia L, Hoile SP, McCormick KG, Burdge GC, et al. Treating liver fat and serum triglyceride levels in NAFLD, effects of PNPLA3 and TM6SF2 genotypes: Results from the WELCOME trial. *J Hepatol*. 2015 Dec 1;63(6):1476–83.
128. Thifault E, Cormier H, Bouchard-Mercier A, Rudkowska I, Paradis A-M, Garneau V, et al. Effects of Age, Sex, Body Mass Index and APOE Genotype on Cardiovascular Biomarker Response to an n-3 Polyunsaturated Fatty Acid Supplementation. *Lifestyle Genomics*. 2013;6(2):73–82.
129. Tremblay BL, Cormier H, Rudkowska I, Lemieux S, Couture P, Vohl M-C. Association between polymorphisms in phospholipase A2 genes and the plasma triglyceride response to an n-3 PUFA supplementation: a clinical trial. *Lipids Health Dis*. 2015 Feb 21;14(1):12.
130. Bastien Vallée Marcotte, Cormier H, Guénard F, Rudkowska I, Lemieux S, Couture P, et al. Novel Genetic Loci Associated with the Plasma Triglyceride Response to an Omega-3 Fatty Acid Supplementation. *J Nutr Nutr*. 2016;9:1–11.
131. Vallée Marcotte B, Guénard F, Marquis J, Charpagne A, Vadillo-Ortega F, Tejero ME, et al. Genetic Risk Score Predictive of the Plasma Triglyceride Response to an Omega-3 Fatty Acid Supplementation in a Mexican Population. *Nutrients* [Internet]. 2019 Mar 29 [cited 2020 Aug 3];11(4). Available from: <https://www.ncbi.nlm.nih.gov/pmc/articles/PMC6521301/>
132. Vallée Marcotte B, Guénard F, Lemieux S, Couture P, Rudkowska I, Calder PC, et al. Fine mapping of genome-wide association study signals to identify genetic markers of the plasma triglyceride response to an omega-3 fatty acid supplementation.
133. Wu S-Y, Mayneris-Perxachs J, Lovegrove JA, Todd S, Yaqoob P. Fish-oil supplementation alters numbers of circulating endothelial progenitor cells and microparticles independently of eNOS genotype. *Am J Clin Nutr*. 2014 Nov 1;100(5):1232–43.
134. Zheng J-S, Chen J, Wang L, Yang H, Fang L, Yu Y, et al. Replication of a Gene-Diet Interaction at CD36, NOS3 and PPARG in Response to Omega-3 Fatty Acid Supplements on Blood Lipids: A Double-Blind Randomized Controlled Trial. *EBioMedicine*. 2018 Apr 17;31:150–6.
135. Dawczynski C, Massey KA, Ness C, Kiehntopf M, Stepanow S, Platzer M, et al. Randomized placebo-controlled intervention with n-3 LC-PUFA-supplemented yoghurt: Effects on circulating eicosanoids and cardiovascular risk factors. *Clin Nutr*. 2013 Oct;32(5):686–96.

- 1  
2  
3  
4  
5  
6  
7  
8  
9  
10  
11  
12  
13  
14  
15  
16  
17  
18  
19  
20  
21  
22  
23  
24  
25  
26  
27  
28  
29  
30  
31  
32  
33  
34  
35  
36  
37  
38  
39  
40  
41  
42  
43  
44  
45  
46  
47  
48  
49  
50  
51  
52  
53  
54  
55  
56  
57  
58  
59  
60
136. Kotze M, Brand T, Pretorius J, J van Rensburg S, Luckhoff HK. Apolipoprotein E epsilon-4 as a genetic determinant of Alzheimer's disease heterogeneity. *Degener Neurol Neuromuscul Dis*. 2015 Jan;9.
  137. Marais AD. Apolipoprotein E in lipoprotein metabolism, health and cardiovascular disease. *Pathology (Phila)*. 2019 Feb;51(2):165–76.
  138. Kuo C-L, Pilling LC, Atkins JL, Kuchel GA, Melzer D. ApoE e2 and aging-related outcomes in 379,000 UK Biobank participants. *Aging*. 2020 Jun 8;12(12):12222–33.
  139. Nawawi HM, Chua Y-A, Watts GF. The brave new world of genetic testing in the management of the dyslipidaemias. *Curr Opin Cardiol*. 2020;35(3):226–33.
  140. Livingston G, Huntley J, Sommerlad A, Ames D, Ballard C, Banerjee S, et al. Dementia prevention, intervention, and care: 2020 report of the Lancet Commission. *The Lancet*. 2020 Aug;396(10248):413–46.
  141. Dorszewska J, Prendecki M, Oczkowska A, Dezor M, Kozubski W. Molecular Basis of Familial and Sporadic Alzheimer's Disease. *Curr Alzheimer Res*. 2016;13(9):952–63.
  142. ACCE Model Process for Evaluating Genetic Tests | CDC [Internet]. 2021 [cited 2021 Feb 15]. Available from: <https://www.cdc.gov/genomics/gtesting/acce/index.htm>
  143. Corella D, Coltell O, Portolés O, Sotos-Prieto M, Fernández-Carrión R, Ramirez-Sabio J, et al. A Guide to Applying the Sex-Gender Perspective to Nutritional Genomics. *Nutrients*. 2018 Dec 20;11(1):4.
  144. Vidaver RM, Lafleur B, Tong C, Bradshaw R, Marts SA. Women Subjects in NIH-Funded Clinical Research Literature: Lack of Progress in Both Representation and Analysis by Sex. *J Womens Health Gend Based Med*. 2000 Jun 1;9(5):495–504.
  145. Little J, Higgins J, Ioannidis J, Moher D, Gagnon F, von Elm E, et al., editors. STrengthening the REporting of Genetic Association studies (STREGA) - An extension of the STROBE statement. *PLoS Med*. 2009;6(2):e1000022.
  146. Strande NT, Riggs ER, Buchanan AH, Ceyhan-Birsoy O, DiStefano M, Dwight SS, et al. Evaluating the Clinical Validity of Gene-Disease Associations: An Evidence-Based Framework Developed by the Clinical Genome Resource. *Am J Hum Genet*. 2017 Jun;100(6):895–906.
  147. Ciesielski TH, Pendergrass SA, White MJ, Kodaman N, Sobota RS, Huang M, et al. Diverse convergent evidence in the genetic analysis of complex disease: coordinating omic, informatic, and experimental evidence to better identify and validate risk factors. *BioData Min*. 2014 Dec;7(1):10.
  148. Rudkowska I, Paradis A-M, Thifault E, Julien P, Barbier O, Couture P, et al. Differences in metabolomic and transcriptomic profiles between responders and non-responders to an n-3 polyunsaturated fatty acids (PUFAs) supplementation. *Genes Nutr*. 2013 Jul;8(4):411–23.

1  
2  
3  
4  
5  
6  
7  
8  
9  
10  
11  
12  
13  
14  
15  
16  
17  
18  
19  
20  
21  
22  
23  
24  
25  
26  
27  
28  
29  
30  
31  
32  
33  
34  
35  
36  
37  
38  
39  
40  
41  
42  
43  
44  
45  
46  
47  
48  
49  
50  
51  
52  
53  
54  
55  
56  
57  
58  
59  
60

149. Ray-Barruel G, Rickard CM. Helping nurses help PIVCs: decision aids for daily assessment and maintenance. Br J Nurs Mark Allen Publ. 2018 Apr 26;27(8):S12-8.

For peer review only

1  
2  
3  
4  
5  
6  
7  
8  
9  
10  
11  
12  
13  
14  
15  
16  
17  
18  
19  
20  
21  
22  
23  
24  
25  
26  
27  
28  
29  
30  
31  
32  
33  
34  
35  
36  
37  
38  
39  
40  
41  
42  
43  
44  
45  
46  
47

For peer review only

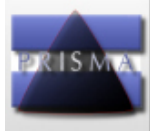

**Figure 1: PRISMA 2009 Flow Diagram**

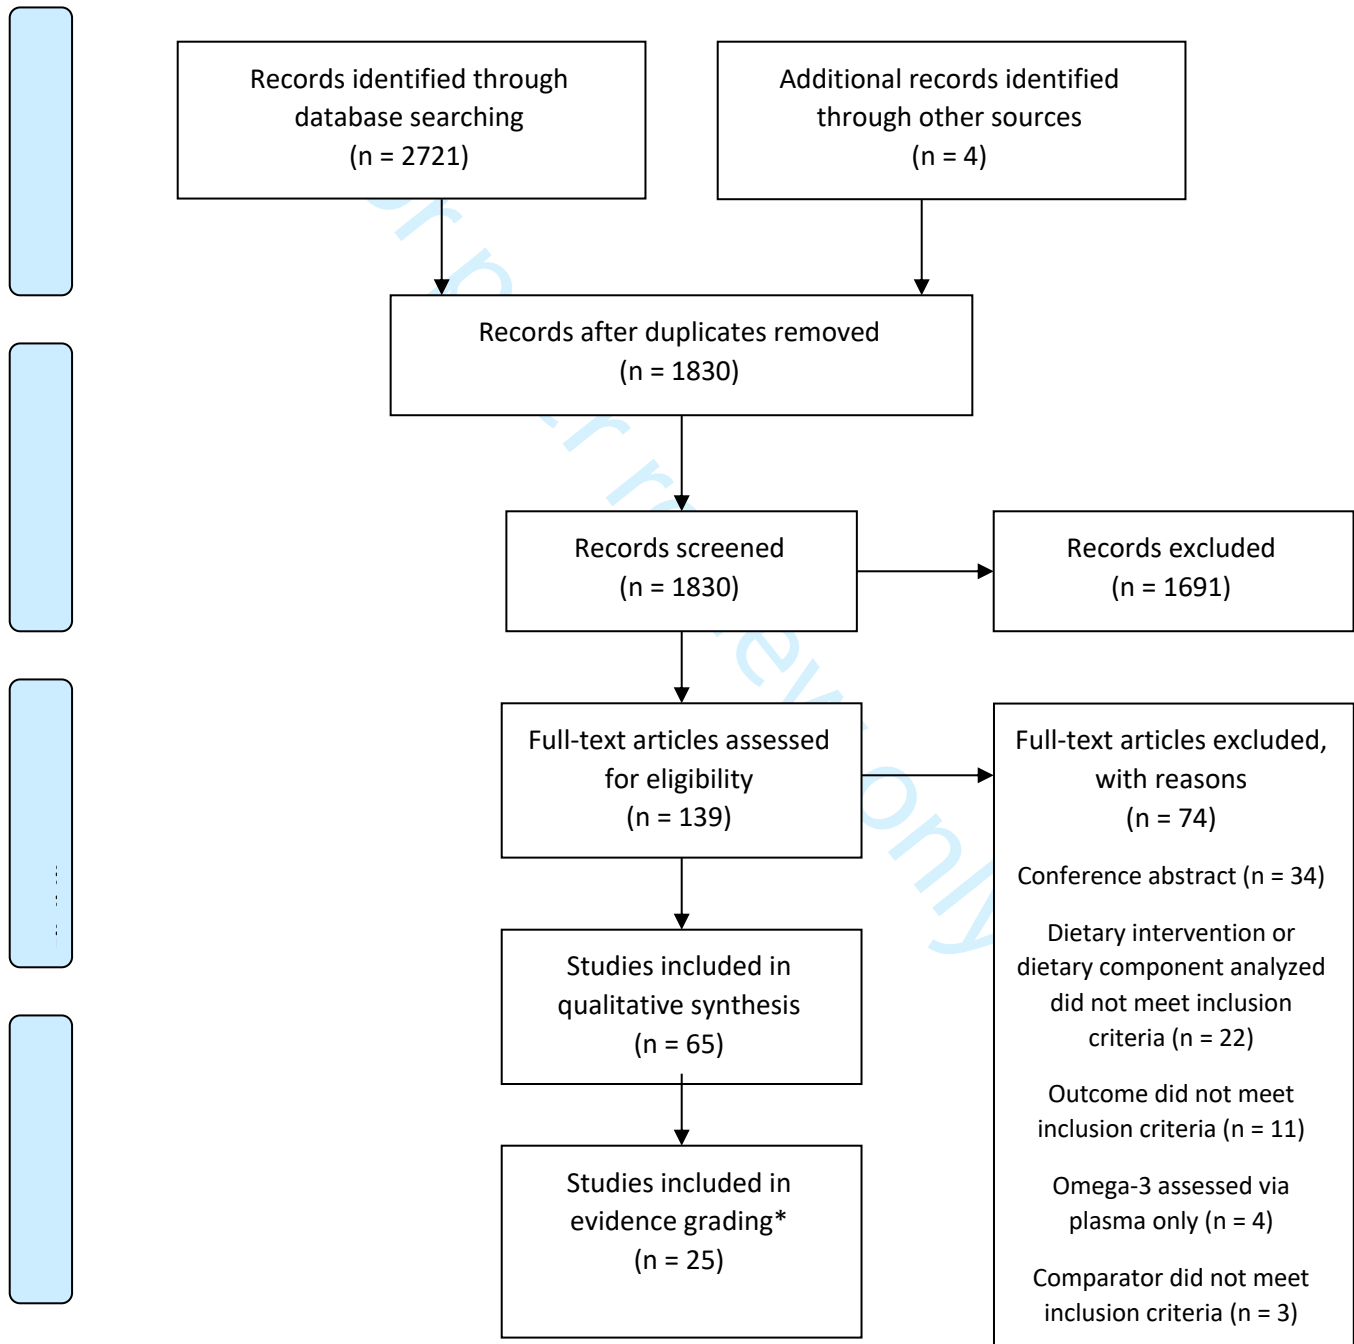

1  
2  
3  
4  
5  
6  
7  
8  
9  
10  
11  
12  
13  
14  
15  
16  
17  
18  
19  
20  
21  
22  
23  
24  
25  
26  
27  
28  
29  
30  
31  
32  
33  
34  
35  
36  
37  
38  
39  
40  
41  
42  
43  
44  
45  
46  
47  
48  
49  
50  
51  
52  
53  
54  
55  
56  
57  
58  
59  
60

For peer review only

1  
2  
3  
4  
5  
6  
7  
8  
9  
10  
11  
12  
13  
14  
15  
16  
17  
18  
19  
20  
21  
22  
23  
24  
25  
26  
27  
28  
29  
30  
31  
32  
33  
34  
35  
36  
37  
38  
39  
40  
41  
42  
43  
44  
45  
46  
47

**Supplementary Tables**

***Supplementary Table 1: Search Strategy***

| <b>Embase</b> |                                                                                                                                                                                                                                                                                                                                                                                                                                                                                   |
|---------------|-----------------------------------------------------------------------------------------------------------------------------------------------------------------------------------------------------------------------------------------------------------------------------------------------------------------------------------------------------------------------------------------------------------------------------------------------------------------------------------|
| <b>#</b>      | <b>Search Strategy</b>                                                                                                                                                                                                                                                                                                                                                                                                                                                            |
| 1             | omega-3':ti,ab,kw OR pufa\$:ti,ab,kw OR ((acid* NEAR/5 ('n-3' OR polyunsaturated OR linolenic OR eicosapenta\$noic OR timnodonic OR docosahexa\$noic)):ti,ab,kw) OR docosahexaenoate:ti,ab,kw OR epa:ti,ab,kw OR dha:ti,ab,kw OR ala:ti,ab,kw                                                                                                                                                                                                                                     |
| 2             | omega 3 fatty acid'/exp                                                                                                                                                                                                                                                                                                                                                                                                                                                           |
| 3             | <b>#1 OR #2</b>                                                                                                                                                                                                                                                                                                                                                                                                                                                                   |
| 4             | cholesterol*:ti,ab,kw OR hdl:ti,ab,kw OR ldl:ti,ab,kw OR 'high density lipoprotein*':ti,ab,kw OR 'low density lipoprotein*':ti,ab,kw OR 'beta lipoprotein*':ti,ab,kw OR apo*protein*:ti,ab,kw OR apoa:ti,ab,kw OR apob:ti,ab,kw OR apoc:ti,ab,kw OR apod:ti,ab,kw OR apoe:ti,ab,kw OR apoh:ti,ab,kw OR ((apo NEXT/1 (a OR b OR c OR d OR e OR h)):ti,ab,kw) OR triglyceride*:ti,ab,kw OR triacylglycerol*:ti,ab,kw OR (((serum OR plasma) NEXT/1 (lipid* OR tg OR tag)):ti,ab,kw) |
| 5             | cholesterol'/exp OR 'lipoprotein'/exp OR 'triacylglycerol'/exp                                                                                                                                                                                                                                                                                                                                                                                                                    |
| 6             | <b>#4 OR #5</b>                                                                                                                                                                                                                                                                                                                                                                                                                                                                   |
| 7             | nutrigenomic*:ti,ab,kw OR nutrigenetic*:ti,ab,kw OR (((nutritional OR expression* OR variation* OR variant*) NEAR/2 (genomic* OR genetic* OR gene OR genes)):ti,ab,kw) OR genotype:ti,ab,kw OR (((('nutrient-gene' OR 'gene-nutrient' OR 'gene-diet') NEXT/1 interaction*)):ti,ab,kw) OR 'personalized nutrition':ti,ab,kw OR 'precision nutrition':ti,ab,kw                                                                                                                      |
| 8             | nutrigenomics'/exp OR 'nutrigenetics'/exp OR 'genetic variation'/exp OR 'genotype'/exp                                                                                                                                                                                                                                                                                                                                                                                            |
| 9             | <b>#7 OR #8</b>                                                                                                                                                                                                                                                                                                                                                                                                                                                                   |
| 10            | <b>#3 AND #6 AND #9</b>                                                                                                                                                                                                                                                                                                                                                                                                                                                           |
| 11            | [animals]/lim NOT [humans]/lim                                                                                                                                                                                                                                                                                                                                                                                                                                                    |
| 12            | <b>#10 NOT #11</b>                                                                                                                                                                                                                                                                                                                                                                                                                                                                |

## Medline (Ovid)

| #  | Search Strategy                                                                                                                                                                                                                                                                                                            |
|----|----------------------------------------------------------------------------------------------------------------------------------------------------------------------------------------------------------------------------------------------------------------------------------------------------------------------------|
| 1  | ("omega-3" or PUFA? or (acid* adj5 ("n-3" or polyunsaturated or linolenic or eicosapenta?noic or timnodonic or docosahexa?noic)) or docosahexaenoate or EPA or DHA or ALA).ab,kf,ti.                                                                                                                                       |
| 2  | exp Fatty Acids, Omega-3/                                                                                                                                                                                                                                                                                                  |
| 3  | <b>1 or 2</b>                                                                                                                                                                                                                                                                                                              |
| 4  | (cholesterol* or HDL or LDL or "high density lipoprotein*" or "low density lipoprotein*" or "beta lipoprotein*" or apo*protein* or apoA or apoB or apoC or apoD or apoE or apoH or (apo adj (A or B or C or D or E or H)) or triglyceride* or triacylglycerol* or ((serum or plasma) adj (lipid* or TG or TAG))).ab,kf,ti. |
| 5  | exp Cholesterol/ or exp Lipoproteins/ or exp Triglycerides/                                                                                                                                                                                                                                                                |
| 6  | <b>4 or 5</b>                                                                                                                                                                                                                                                                                                              |
| 7  | (nutrigenomic* or nutrigenetic* or ((nutritional or expression* or variation* or variant*) adj2 (genomic* or genetic* or gene or genes)) or genotype or (("nutrient-gene" or "gene-nutrient" or "gene-diet") adj interaction*) or "personalized nutrition" or "precision nutrition").ab,kf,ti.                             |
| 8  | Nutrigenomics/ or Genetic Variation/ or Genotype/                                                                                                                                                                                                                                                                          |
| 9  | <b>7 or 8</b>                                                                                                                                                                                                                                                                                                              |
| 10 | <b>3 and 6 and 9</b>                                                                                                                                                                                                                                                                                                       |
| 11 | exp animals/ not humans.sh.                                                                                                                                                                                                                                                                                                |
| 12 | <b>10 not 11</b>                                                                                                                                                                                                                                                                                                           |

## Web of Science

*Indexes = SCI-EXPANDED, SSCI, A&HCI, CPCI-S, CPCI-SSH, ESCI Timespan =All years*



1  
2  
3  
4  
5  
6  
7  
8  
9  
10  
11  
12  
13  
14  
15  
16  
17  
18  
19  
20  
21  
22  
23  
24  
25  
26  
27  
28  
29  
30  
31  
32  
33  
34  
35  
36  
37  
38  
39  
40  
41  
42  
43  
44  
45  
46  
47

| # | Search Strategy                                                                                                                                                                                                                                                                                                                                                                                                                                                                                                                                                                                                                                                                                                                                                                                                                                                                                                                                                                                                                                                                                                                                                                                                                                                                                                                                                                                                                                                                                                                                                                                                                                                                                                                                                                                                                                                                                                                                                                                                                                                                                                                                                                                                                                                                                                                                                                                                                                                                                                                                                                                                                                                                                                                                                                                                                                                                                                                                                       |
|---|-----------------------------------------------------------------------------------------------------------------------------------------------------------------------------------------------------------------------------------------------------------------------------------------------------------------------------------------------------------------------------------------------------------------------------------------------------------------------------------------------------------------------------------------------------------------------------------------------------------------------------------------------------------------------------------------------------------------------------------------------------------------------------------------------------------------------------------------------------------------------------------------------------------------------------------------------------------------------------------------------------------------------------------------------------------------------------------------------------------------------------------------------------------------------------------------------------------------------------------------------------------------------------------------------------------------------------------------------------------------------------------------------------------------------------------------------------------------------------------------------------------------------------------------------------------------------------------------------------------------------------------------------------------------------------------------------------------------------------------------------------------------------------------------------------------------------------------------------------------------------------------------------------------------------------------------------------------------------------------------------------------------------------------------------------------------------------------------------------------------------------------------------------------------------------------------------------------------------------------------------------------------------------------------------------------------------------------------------------------------------------------------------------------------------------------------------------------------------------------------------------------------------------------------------------------------------------------------------------------------------------------------------------------------------------------------------------------------------------------------------------------------------------------------------------------------------------------------------------------------------------------------------------------------------------------------------------------------------|
| 1 | TS=("omega-3" or PUFA\$ or (acid* NEAR/5 ("n-3" or polyunsaturated or linolenic or eicosapenta\$noic or timnodonic or docosahexa\$noic)) or docosahexaenoate or EPA or DHA or ALA)                                                                                                                                                                                                                                                                                                                                                                                                                                                                                                                                                                                                                                                                                                                                                                                                                                                                                                                                                                                                                                                                                                                                                                                                                                                                                                                                                                                                                                                                                                                                                                                                                                                                                                                                                                                                                                                                                                                                                                                                                                                                                                                                                                                                                                                                                                                                                                                                                                                                                                                                                                                                                                                                                                                                                                                    |
| 2 | TS=(cholesterol* or HDL or LDL or "high density lipoprotein*" or "low density lipoprotein*" or "beta lipoprotein*" or apo*protein* or apoA or apoB or apoC or apoD or apoE or apoH or (apo NEAR/0 (A or B or C or D or E or H)) or triglyceride* or triacylglycerol* or ((serum or plasma) NEAR/0 (lipid* or TG or TAG)))                                                                                                                                                                                                                                                                                                                                                                                                                                                                                                                                                                                                                                                                                                                                                                                                                                                                                                                                                                                                                                                                                                                                                                                                                                                                                                                                                                                                                                                                                                                                                                                                                                                                                                                                                                                                                                                                                                                                                                                                                                                                                                                                                                                                                                                                                                                                                                                                                                                                                                                                                                                                                                             |
| 3 | TS=(nutrigenomic* or nutrigenetic* or ((nutritional or expression* or variation* or variant*) NEAR/2 (genomic* or genetic* or gene or genes)) or genotype or (("nutrient-gene" or "gene-nutrient" or "gene-diet") NEAR/0 interaction*) or "personalized nutrition" or "precision nutrition" )                                                                                                                                                                                                                                                                                                                                                                                                                                                                                                                                                                                                                                                                                                                                                                                                                                                                                                                                                                                                                                                                                                                                                                                                                                                                                                                                                                                                                                                                                                                                                                                                                                                                                                                                                                                                                                                                                                                                                                                                                                                                                                                                                                                                                                                                                                                                                                                                                                                                                                                                                                                                                                                                         |
| 4 | <b>#1 AND #2 AND #3</b>                                                                                                                                                                                                                                                                                                                                                                                                                                                                                                                                                                                                                                                                                                                                                                                                                                                                                                                                                                                                                                                                                                                                                                                                                                                                                                                                                                                                                                                                                                                                                                                                                                                                                                                                                                                                                                                                                                                                                                                                                                                                                                                                                                                                                                                                                                                                                                                                                                                                                                                                                                                                                                                                                                                                                                                                                                                                                                                                               |
| 5 | TS=(animals OR animal OR mice OR mus OR mouse OR murine OR woodmouse OR rats OR rat OR murinae OR muridae OR cottonrat OR cottonrats OR hamster OR hamsters OR cricetinae OR rodentia OR rodent OR rodents OR pigs OR pig OR swine OR swines OR piglets OR piglet OR boar OR boars OR "sus scrofa" OR ferrets OR ferret OR polecat OR polecats OR "mustela putorius" OR "guinea pigs" OR "guinea pig" OR cavia OR callithrix OR marmoset OR marmosets OR cebuella OR hapale OR octodon OR chinchilla OR chinchillas OR gerbillinae OR gerbil OR gerbils OR jird OR jirds OR merione OR meriones OR rabbits OR rabbit OR hares OR hare OR diptera OR flies OR fly OR dipteral OR drosophila OR drosophilidae OR cats OR cat OR carus OR felis OR nematoda OR nematode OR nematoda OR nematode OR nematodes OR sipunculida OR dogs OR dog OR canine OR canines OR canis OR sheep OR sheeps OR mouflon OR mouflons OR ovis OR goats OR goat OR capra OR capras OR rupicapra OR chamois OR haplorhini OR monkey OR monkeys OR anthropoidea OR anthropoids OR saguinus OR tamarin OR tamarins OR leontopithecus OR hominidae OR ape OR apes OR pan OR paniscus OR "pan paniscus" OR bonobo OR bonobos OR troglodytes OR "pan troglodytes" OR gibbon OR gibbons OR siamang OR siamangs OR nomascus OR symphalangus OR chimpanzee OR chimpanzees OR prosimians OR "bush baby" OR prosimian OR bush babies OR galagos OR galago OR pongidae OR gorilla OR gorillas OR pongo OR pygmaeus OR "pongo pygmaeus" OR orangutans OR pygmaeus OR lemur OR lemurs OR lemuridae OR horse OR horses OR pongo OR equus OR cow OR calf OR bull OR chicken OR chickens OR gallus OR quail OR bird OR birds OR quails OR poultry OR poultries OR fowl OR fowls OR reptile OR reptilia OR reptiles OR snakes OR snake OR lizard OR lizards OR alligator OR alligators OR crocodile OR crocodiles OR turtle OR turtles OR amphibian OR amphibians OR amphibia OR frog OR frogs OR bombina OR salientia OR toad OR toads OR "epidalea calamita" OR salamander OR salamanders OR eel OR eels OR sciuridae OR squirrel OR squirrels OR chipmunk OR chipmunks OR suslik OR susliks OR vole OR voles OR lemming OR lemmings OR muskrat OR muskrats OR lemmus OR otter OR otters OR marten OR martens OR martes OR weasel OR badger OR badgers OR ermine OR mink OR minks OR sable OR sables OR gulo OR gulos OR wolverine OR wolverines OR minks OR mustela OR llama OR llamas OR alpaca OR alpacas OR camelid OR camelids OR guanaco OR guanacos OR chiroptera OR chiropteras OR bat OR bats OR fox OR foxes OR iguana OR iguanas OR xenopus laevis OR parakeet OR parakeets OR parrot OR parrots OR donkey OR donkeys OR mule OR mules OR zebra OR zebras OR shrew OR shrews OR bison OR bisons OR buffalo OR buffaloes OR deer OR deers OR bear OR bears OR panda OR pandas OR "wild hog" OR "wild boar" OR fitchew OR fitch OR beaver OR beavers OR jerboa OR jerboas OR capybara OR capybaras) |
| 6 | <b>#4 not #5</b>                                                                                                                                                                                                                                                                                                                                                                                                                                                                                                                                                                                                                                                                                                                                                                                                                                                                                                                                                                                                                                                                                                                                                                                                                                                                                                                                                                                                                                                                                                                                                                                                                                                                                                                                                                                                                                                                                                                                                                                                                                                                                                                                                                                                                                                                                                                                                                                                                                                                                                                                                                                                                                                                                                                                                                                                                                                                                                                                                      |

**Supplementary Table 2: Genes, SNPs, lipid/lipoprotein outcomes and studies included in evidence grading process and guideline development**

| Gene, SNP(s)                              | Outcome | Studies                                                                                                                                                                                                                                                                  |
|-------------------------------------------|---------|--------------------------------------------------------------------------------------------------------------------------------------------------------------------------------------------------------------------------------------------------------------------------|
| <i>APOE</i> : rs429358, rs7412 (Genotype) | TG      | AbuMweis et al. 2018 (65)<br>Carvalho-Wells et al. 2012 (106)<br>Caslake et al. 2008 (108)<br>Dang et al. 2015 (68)<br>Jackson et al. 2012 (69)<br>Olano-Martin et al. 2010 (72)<br>Minihane et al. 2000 (115)<br>Paschos et al. 2005 (73)<br>Thifault et al. 2013 (122) |
| <i>APOE</i> : rs429358, rs7412            | Total-c | Fallaize et al. 2016 (48)<br>AbuMweis et al. 2018 (65)<br>Carvalho-Wells et al. 2012 (106)<br>Caslake et al. 2008 (108)<br>Dang et al. 2015 (68)<br>Jackson et al. 2012 (69)<br>Olano-Martin et al. 2010 (72)<br>Paschos et al. 2005 (73)<br>Thifault et al. 2013 (122)  |
| <i>PPAR</i> $\gamma$ 2: rs1801282         | LDL-c   | Binia et al. 2017 (77)<br>Harsløf et al. 2014 (56)<br>Itariu et al. 2012 (78)<br>Lindi et al. 2003 (79)<br>Zheng et al. 2018 (128)                                                                                                                                       |
| <i>PPAR</i> $\gamma$ 2: rs1801282         | Total-c | Binia et al. 2017 (77)<br>Harsløf et al. 2014 (56)<br>Itariu et al. 2012 (78)<br>Lindi et al. 2003 (79)<br>Zheng et al. 2018 (128)                                                                                                                                       |
| <i>PPAR</i> $\gamma$ 2: rs1801282         | TG      | Binia et al. 2017 (77)<br>Harsløf et al. 2014 (56)<br>Itariu et al. 2012 (78)<br>Lindi et al. 2003 (79)<br>Zheng et al. 2018 (128)                                                                                                                                       |
| <i>CD36</i> : rs1761667                   | HDL-c   | Dawczynski et al. 2013 (76)<br>Madden et al. 2008 (75)                                                                                                                                                                                                                   |
| <i>CD36</i> : rs1761667                   | TG      | Dawczynski et al. 2013 (76)<br>Madden et al. 2008 (75)                                                                                                                                                                                                                   |
| <i>CD36</i> : rs1049673                   | HDL-c   | Dawczynski et al. 2013 (76)<br>Madden et al. 2008 (75)                                                                                                                                                                                                                   |
| <i>CD36</i> : rs1527483                   | TG      | Madden et al. 2008 (75)<br>Zheng et al. 2018 (128)                                                                                                                                                                                                                       |
| <i>FADS</i> : rs174547*                   | Total-c | Dumont et al. 2011 (37)<br>Dumont et al. 2018 (38)<br>Lu et al. 2010 (94)<br>Standl et al. 2012 (41)<br>Alsaleh et al. 2014 (100)<br>AbuMweis et al. 2018 (65)<br>Roke et al. 2014 (63)                                                                                  |
| 31-SNP Genetic Risk Score                 | TG      | Vallée Marcotte et al. 2019 (59)<br>Vallée Marcotte et al. 2020 (60)                                                                                                                                                                                                     |

Supplementary Table 3: Additional list of gene(s) and SNP(s) tested in studies

| Study                                                     | Gene(s), SNP(s)                                                                                                                                                                                                                                                                                                                                                                                                                                                                                                                                                              |
|-----------------------------------------------------------|------------------------------------------------------------------------------------------------------------------------------------------------------------------------------------------------------------------------------------------------------------------------------------------------------------------------------------------------------------------------------------------------------------------------------------------------------------------------------------------------------------------------------------------------------------------------------|
| Chen et al. Int J Obes;43:808-820 (2019)                  | <p><i>FADS2</i>, rs174599, rs174601, rs556656, rs11501631, rs74771917, rs3168072, rs182008711, rs73487492, rs174602, rs12577276</p> <p><i>FADS3</i>, rs191972868, rs115905177, rs174635, rs174634, rs174454, rs12292968, rs174570, rs7930349, rs116672159, rs116139751, rs7942717, rs7115739, rs174450, rs74626285</p> <p><i>RAB31L1</i>, rs741887, rs2521561, rs2727258, rs2524288, rs117518711, rs74957100, rs77071864, rs78243280, rs741888, rs2524287, rs12420625, rs77229376, rs187943834, rs78156005, rs190738753, rs11230827, rs76133863, rs116985542, rs73491252</p> |
| Cormier et al. 2012                                       | <p><i>FADS</i> gene cluster rs174456, rs174627, rs482548, rs2072114, rs12807005, rs174448, rs2845573, rs7394871, rs7942717, rs74823126, rs174602, rs498793, rs7935946, rs174546, rs174570, rs174579, rs174611, rs174616, rs968567</p>                                                                                                                                                                                                                                                                                                                                        |
| Vallée Marcotte et al. Am J Clin Nutr;109:176–185 (2019)  | <p><i>IQCJ-SCHIP1</i>, rs7639707, rs62270407</p> <p><i>NXPH1</i>, rs61569932, rs1990554, rs6463808, rs6966968, rs28473103, rs28673635, rs12702829, rs78943417, rs293180, rs1837523</p> <p><i>PHF17</i>, rs1216346, rs114348423, rs75007521</p> <p><i>MYB</i>, rs72560788, rs72974149, rs210962, rs6933462</p> <p><i>NELL1</i>, rs79624996, rs1850875, rs78786240, rs117114492</p> <p><i>SLIT2</i>, rs184945470, rs143662727, rs10009109, rs10009535, rs61790364, rs73241936, rs16869663, rs76015249</p>                                                                      |
| Tremblay et al. Lipids in Health and Disease (2015) 14:12 | <p><i>PLA2G2A</i>, rs876018, rs955587, rs3753827, rs11573156, rs11573142</p> <p><i>PLA2G2C</i>, rs6426616, rs12139100, rs10916716, rs2301475, rs10916712, rs10916718</p> <p><i>PLA2G2D</i>, rs578459, rs16823482, rs3736979, rs584367, rs12045689, rs679667, rs17354769, rs1091671</p> <p><i>PLA2G2F</i>, rs12065685, rs6657574, rs11582551, rs818571, rs631134, rs11583904</p>                                                                                                                                                                                              |

|                                                                     |                                                                                                                                                                                                                                                                                                                                                                                                                                                                                                                                                                                                                                                        |
|---------------------------------------------------------------------|--------------------------------------------------------------------------------------------------------------------------------------------------------------------------------------------------------------------------------------------------------------------------------------------------------------------------------------------------------------------------------------------------------------------------------------------------------------------------------------------------------------------------------------------------------------------------------------------------------------------------------------------------------|
|                                                                     | <p><i>PLA2G4A</i>, rs979924, rs2076075, rs3736741, rs10911949, rs10752979, rs1160719, rs10737277, rs12720702, rs7522213, rs7540602, rs10157410, rs12720497, rs4651331, rs1569480, rs10911935, rs12353944, rs11576330, rs10489410, rs10911946, rs3820185, rs12746200, rs11587539</p> <p><i>PLA2G6</i>, rs5750546, rs132989, rs133016, rs2235346, rs2284060</p> <p><i>PLA2G7</i>, rs12195701, rs12528807, rs1421368, rs1421378, rs17288905, rs1805017, rs1805018, rs6929105, rs7756935</p>                                                                                                                                                               |
| <p>Ouellette et al. J Nutrigenet Nutrigenomics;6:268–280 (2013)</p> | <p><i>GPAM</i>, rs17129561, rs10787428, rs2792751</p> <p><i>AGPAT3</i>, rs999519, rs2838440, rs2838445, rs2838458, rs4818873, rs9978441, rs9982600, rs11700575, rs17004619, rs2838452, rs2838456, rs3788086, rs2838429</p> <p><i>AGPAT4</i>, rs746731, rs747866, rs1125640, rs2277092, rs2293286, rs3757025, rs3798225, rs3798920, rs3798924, rs3798929, rs3798943, rs3798945, rs3822853, rs3823058, rs4709501, rs6906489, rs6923835, rs7750302, rs7769321, rs9458172, rs10945713, rs10945719, rs11965825, rs12202278, rs17627837, rs12524665, rs1001422, rs6455711, rs9456642, rs2064721, rs3778227, rs3798922, rs11967514, rs7768457, rs12662114</p> |
| <p>Ouellette et al. Lipids in Health and Disease, 13:86 (2014)</p>  | <p><i>MGLL</i>, rs782440, rs16826716, rs6776142, rs9877819, rs555183, rs6780384, rs13076593, rs605188, rs6765071, rs782444, rs549662, rs3773155, rs541855, rs6439081, rs6439082, rs6787155, rs1466571, rs893294</p>                                                                                                                                                                                                                                                                                                                                                                                                                                    |
| <p>Bouchard-Mercier et al. Genes Nutr 9:395 (2014)</p>              | <p><i>GCK</i>, rs2268573, rs2908297, rs2971676, rs758989, rs12673242, rs2908290, rs2284777, rs2300584, rs1990458, rs741038, rs1799884, rs2908277, rs3757838</p>                                                                                                                                                                                                                                                                                                                                                                                                                                                                                        |
| <p>Bouchard-Mercier et al. Nutrients, 6, 1145-1163 (2014)</p>       | <p><i>RXRA</i>, rs10881576, rs7871655, rs12339187, rs11185660, rs11103473, rs10776909, rs12004589, rs3132301, rs1805352, rs3132294, rs1805343, rs1045570</p> <p><i>CPT1A</i>, rs3019598, rs897048, rs7942147, rs4930248, rs11228364, rs11228368, rs10896371, rs1017640, rs613084</p> <p><i>ACADVL</i>, rs2017365</p> <p><i>ACAA2</i>, rs529556, rs10502901, rs631536, rs1942421, rs2276168, rs7237253</p> <p><i>ABCD2</i>, rs4072006, rs10877201, rs12582802, rs4294600, rs11172696, rs10877173, rs7133376, rs7968837</p> <p><i>ACOX1</i>, rs10852766, rs3744033, rs12430, rs8065144,</p>                                                              |

|                                                                  |                                                                                                                                                                                                                                                                                                                                                                                                                                                                                                                                                                               |
|------------------------------------------------------------------|-------------------------------------------------------------------------------------------------------------------------------------------------------------------------------------------------------------------------------------------------------------------------------------------------------------------------------------------------------------------------------------------------------------------------------------------------------------------------------------------------------------------------------------------------------------------------------|
|                                                                  | rs11651351, rs3643, rs7213998, rs17583163<br><i>ACAA1</i> , rs2239621, rs156265, rs5875                                                                                                                                                                                                                                                                                                                                                                                                                                                                                       |
| AlSaleh et al. Genes Nutr 9:412 (2014)                           | <i>CETP</i> , rs3764261, rs247616, rs7205804<br><i>LIPC</i> , rs1532085<br><i>APOB</i> , rs1367117<br><i>ABCG5</i> , <i>ABCG8</i> , rs4299376<br><i>TIMD4</i> , <i>HAVCR1</i> , rs6882076, rs1501908, rs1553318<br>GCKR, rs1260326, rs780094<br>TRIB1, rs2954022, rs10808546, rs2954029<br><i>ANGPTL3</i> , <i>DOCK7</i> , rs3850634, rs1167998, rs2131925<br><i>FADS1</i> , <i>FADS2</i> , <i>FADS3</i> , rs174550, rs174547, rs174546, rs174583<br><i>GALNT2</i> , rs4846914, rs1321257<br><i>ABCA1</i> , rs4149268<br><i>APOE</i> , <i>APOC1</i> , <i>APOC2</i> , rs439401 |
| Vallée Marcotte et al. Genes & Nutrition 15:10 (2020)            | <i>IQCJ-SCHIP1</i> , rs7639707, rs62270407<br>NXP1, rs61569932, rs1990554, rs6463808, rs6966968, rs28473103, rs28673635, rs12702829, rs78943417, rs293180, rs1837523<br><i>PHF17</i> , rs1216346, rs114348423, rs75007521<br><i>MYB</i> , rs72560788, rs72974149, rs210962, rs6933462<br><i>NELL1</i> , rs79624996, rs1850875, rs78786240, rs117114492<br><i>SLIT2</i> , rs184945470, rs143662727, rs10009109, rs10009535, rs61790364, rs73241936, rs16869663, rs76015249                                                                                                     |
| Rudkowska et al. Journal of Lipid Research 55 (2014)             | <i>IQCJ-SCHIP1</i> , <i>MYB</i> , <i>NELL1</i> , <i>NXP1</i> , <i>PHF17</i> , <i>SLIT2</i> , rs2621308, rs1449009, rs61332355, rs2621309, rs2952724, rs2629715, rs1216352, rs1216365, rs931681, rs6920829, rs6463808, rs752088                                                                                                                                                                                                                                                                                                                                                |
| Vallée Marcotte et al. J Nutrigenet Nutrigenomics;9 :1-11 (2016) | <i>IQCJ</i> , rs12497650, rs4501157, rs13091349, rs2044704, rs1062071, rs7634829, rs2621294, rs6800211, rs17782879, rs1868414, rs2595260, rs6763890, rs9827242, rs1449009, rs2621309, rs61332355                                                                                                                                                                                                                                                                                                                                                                              |

|                                                         |                                                                                                                                                                                                                                                                                                                                                                                                                                                                                                                                                                                                                                                                                                                                                                                                                                                                                                                                                                                                                                                                                                                                                                                            |
|---------------------------------------------------------|--------------------------------------------------------------------------------------------------------------------------------------------------------------------------------------------------------------------------------------------------------------------------------------------------------------------------------------------------------------------------------------------------------------------------------------------------------------------------------------------------------------------------------------------------------------------------------------------------------------------------------------------------------------------------------------------------------------------------------------------------------------------------------------------------------------------------------------------------------------------------------------------------------------------------------------------------------------------------------------------------------------------------------------------------------------------------------------------------------------------------------------------------------------------------------------------|
|                                                         | <p><i>NXPFI</i>, rs6956210, rs2107779, rs10273195, rs12216689, rs6963644, rs17150341, rs1013868, rs12537067, rs4318981, rs17153997, rs7801099, rs4725120, rs1859275, rs10238726, rs1012960, rs11767429, rs4333500, rs7793115, rs7799856, rs7806226, rs13221144, rs17406479, rs10486228, rs17154569, rs4141002, rs7805772, rs2349780, rs2107474, rs11769942, rs6952383, rs6974252, rs10265408, rs2189904, rs2057862</p> <p><i>PHF17</i>, rs2217023, rs4975270, rs11722830, rs12505447, rs6534704, rs13148510, rs13143771, rs13142964</p> <p><i>MYB</i>, rs9321493, rs11154794, rs210798, rs210936, rs7757388, rs210962, rs17639758, rs1013891, rs2179308</p>                                                                                                                                                                                                                                                                                                                                                                                                                                                                                                                                |
| <p>Vallée Marcotte et al. Nutrients; 11, 737 (2019)</p> | <p><i>IQCJ-SCHIP1</i>, rs12497650, rs4501157, rs13091349, rs2044704, rs1962071, rs7634829, rs2621294, rs6800211, rs17782879, rs1868414, rs2595260, rs6763890, rs1449009, rs61332355, rs12485627, rs2595242, rs7639937, rs9820807, rs1375409, rs1967363, rs9824310, rs11915303, rs9835214, rs11921343, rs13066560, rs1675497, rs9839862, rs16829875, rs17795566, rs9860588, rs16830408, rs17798579, rs2364930, rs9865997, rs2595241, rs7632574, rs2621308</p> <p><i>NXPFI</i>, rs6956210, rs2107779, rs10273195, rs12216689, rs6963644, rs17150341, rs1013868, rs4318981, rs17153997, rs7801099, rs4725120, rs10238726, rs1012960, rs11767429, rs4333500, rs7793115, rs7799856, rs7806226, rs13221144, rs17406479, rs10486228, rs17154569, rs4141002, rs7805772, rs2349780, rs2107474, rs11769942, rs6952383, rs6974252, rs10265408, rs2189904, rs2057862, rs6463808</p> <p><i>PHF17</i>, rs2217023, rs4975270, rs11722830, rs12505447, rs6534704, rs13148510, rs13143771, rs13142964, rs1216352, rs1216365</p> <p><i>MYB</i>, rs9321493, rs11154794, rs210798, rs210936, rs7757388, rs17639758, rs1013891, rs2179308, rs6920829, <i>SLIT2</i>, rs2952724</p> <p><i>NELLI</i>, rs752088</p> |

Supplementary Table 4: 31-SNP Nutri-GRS

| Gene, rs Number                 | Alleles <sup>1</sup> | Associated Points |
|---------------------------------|----------------------|-------------------|
| <i>IQCJ-SCHIP1</i> , rs7639707  | <u>A</u> /G          | +1                |
| <i>IQCJ-SCHIP1</i> , rs62270407 | C/ <u>T</u>          | -1                |
| <i>NXPH1</i> , rs61569932,      | <u>G</u> /T          | +1                |
| <i>NXPH1</i> , rs1990554        | <u>A</u> /C          | +1                |
| <i>NXPH1</i> , rs6463808        | <u>A</u> /G          | +1                |
| <i>NXPH1</i> , rs6966968        | <u>A</u> /G          | +1                |
| <i>NXPH1</i> , rs28473103       | <u>A</u> / <u>G</u>  | -1                |
| <i>NXPH1</i> , rs28673635       | <u>A</u> /G          | +1                |
| <i>NXPH1</i> , rs12702829       | <u>C</u> /T          | +1                |
| <i>NXPH1</i> , rs78943417       | A/ <u>T</u>          | -1                |
| <i>NXPH1</i> , rs293180         | G/ <u>T</u>          | +1                |
| <i>NXPH1</i> , rs1837523        | <u>C</u> /T          | -1                |
| <i>PHF17</i> , rs1216346        | <u>C</u> /T          | +1                |
| <i>PHF17</i> , rs114348423      | <u>A</u> /G          | +1                |
| <i>PHF17</i> , rs75007521       | <u>G</u> /T          | -1                |
| <i>MYB</i> , rs72560788         | <u>C</u> / <u>T</u>  | -1                |
| <i>MYB</i> , rs72974149         | <u>A</u> / <u>G</u>  | -1                |
| <i>MYB</i> , rs210962           | <u>C</u> / <u>T</u>  | -1                |
| <i>MYB</i> , rs6933462          | <u>C</u> / <u>G</u>  | +1                |
| <i>NELL1</i> , rs79624996       | <u>A</u> /G          | +1                |
| <i>NELL1</i> , rs1850875        | <u>C</u> /T          | +1                |
| <i>NELL1</i> , rs78786240       | <u>C</u> / <u>T</u>  | -1                |
| <i>NELL1</i> , rs117114492      | <u>G</u> /T          | +1                |
| <i>SLIT2</i> , rs184945470      | <u>C</u> / <u>T</u>  | +1                |
| <i>SLIT2</i> , rs143662727      | <u>A</u> / <u>G</u>  | -1                |
| <i>SLIT2</i> , rs10009109       | <u>C</u> /T          | +1                |
| <i>SLIT2</i> , rs10009535       | <u>A</u> / <u>G</u>  | +1                |
| <i>SLIT2</i> , rs61790364       | <u>A</u> / <u>G</u>  | +1                |
| <i>SLIT2</i> , rs73241936       | <u>C</u> / <u>T</u>  | +1                |
| <i>SLIT2</i> , rs16869663       | <u>A</u> / <u>G</u>  | +1                |
| <i>SLIT2</i> , rs76015249       | <u>A</u> / <u>G</u>  | +1                |

1. Minor alleles are underlined

For individuals carrying one or two minor alleles, provide the associated number of points (either +1 or -1). For individuals homozygous for the major allele, provide 0 points. Count the overall number of points. Individuals with lower nutri-GRS are more likely to respond to approximately 3.0 g/day EPA+DHA for TG lowering.

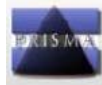

# PRISMA 2009 Checklist

| Section/topic                      | #  | Checklist item                                                                                                                                                                                                                                                                                              | Reported on page # |
|------------------------------------|----|-------------------------------------------------------------------------------------------------------------------------------------------------------------------------------------------------------------------------------------------------------------------------------------------------------------|--------------------|
| <b>TITLE</b>                       |    |                                                                                                                                                                                                                                                                                                             |                    |
| Title                              | 1  | Identify the report as a systematic review, meta-analysis, or both.                                                                                                                                                                                                                                         | 1                  |
| <b>ABSTRACT</b>                    |    |                                                                                                                                                                                                                                                                                                             |                    |
| Structured summary                 | 2  | Provide a structured summary including, as applicable: background; objectives; data sources; study eligibility criteria, participants, and interventions; study appraisal and synthesis methods; results; limitations; conclusions and implications of key findings; systematic review registration number. | 2                  |
| <b>INTRODUCTION</b>                |    |                                                                                                                                                                                                                                                                                                             |                    |
| Rationale                          | 3  | Describe the rationale for the review in the context of what is already known.                                                                                                                                                                                                                              | 3-5                |
| Objectives                         | 4  | Provide an explicit statement of questions being addressed with reference to participants, interventions, comparisons, outcomes, and study design (PICOS).                                                                                                                                                  | 5-6                |
| <b>METHODS</b>                     |    |                                                                                                                                                                                                                                                                                                             |                    |
| Protocol and registration          | 5  | Indicate if a review protocol exists, if and where it can be accessed (e.g., Web address), and, if available, provide registration information including registration number.                                                                                                                               | 5                  |
| Eligibility criteria               | 6  | Specify study characteristics (e.g., PICOS, length of follow-up) and report characteristics (e.g., years considered, language, publication status) used as criteria for eligibility, giving rationale.                                                                                                      | 5-6                |
| Information sources                | 7  | Describe all information sources (e.g., databases with dates of coverage, contact with study authors to identify additional studies) in the search and date last searched.                                                                                                                                  | 5, 7               |
| Search                             | 8  | Present full electronic search strategy for at least one database, including any limits used, such that it could be repeated.                                                                                                                                                                               | Suppl. T1          |
| Study selection                    | 9  | State the process for selecting studies (i.e., screening, eligibility, included in systematic review, and, if applicable, included in the meta-analysis).                                                                                                                                                   | 6-7                |
| Data collection process            | 10 | Describe method of data extraction from reports (e.g., piloted forms, independently, in duplicate) and any processes for obtaining and confirming data from investigators.                                                                                                                                  | 6-7                |
| Data items                         | 11 | List and define all variables for which data were sought (e.g., PICOS, funding sources) and any assumptions and simplifications made.                                                                                                                                                                       | 5-7                |
| Risk of bias in individual studies | 12 | Describe methods used for assessing risk of bias of individual studies (including specification of whether this was done at the study or outcome level), and how this information is to be used in any data synthesis.                                                                                      | 8-9                |
| Summary measures                   | 13 | State the principal summary measures (e.g., risk ratio, difference in means).                                                                                                                                                                                                                               | 9                  |



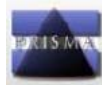

# PRISMA 2009 Checklist

|                      |    |                                                                                                                                                           |                                    |
|----------------------|----|-----------------------------------------------------------------------------------------------------------------------------------------------------------|------------------------------------|
| Synthesis of results | 14 | Describe the methods of handling data and combining results of studies, if done, including measures of consistency (e.g., $I^2$ ) for each meta-analysis. | NA (meta-analysis not appropriate) |
|----------------------|----|-----------------------------------------------------------------------------------------------------------------------------------------------------------|------------------------------------|

Page 1 of 2

| Section/topic                 | #  | Checklist item                                                                                                                                                                                           | Reported on page # |
|-------------------------------|----|----------------------------------------------------------------------------------------------------------------------------------------------------------------------------------------------------------|--------------------|
| Risk of bias across studies   | 15 | Specify any assessment of risk of bias that may affect the cumulative evidence (e.g., publication bias, selective reporting within studies).                                                             | Table 4            |
| Additional analyses           | 16 | Describe methods of additional analyses (e.g., sensitivity or subgroup analyses, meta-regression), if done, indicating which were pre-specified.                                                         | 11-12              |
| <b>RESULTS</b>                |    |                                                                                                                                                                                                          |                    |
| Study selection               | 17 | Give numbers of studies screened, assessed for eligibility, and included in the review, with reasons for exclusions at each stage, ideally with a flow diagram.                                          | Figure 1           |
| Study characteristics         | 18 | For each study, present characteristics for which data were extracted (e.g., study size, PICOS, follow-up period) and provide the citations.                                                             | Tables 1 and 2     |
| Risk of bias within studies   | 19 | Present data on risk of bias of each study and, if available, any outcome level assessment (see item 12).                                                                                                | Table 4            |
| Results of individual studies | 20 | For all outcomes considered (benefits or harms), present, for each study: (a) simple summary data for each intervention group (b) effect estimates and confidence intervals, ideally with a forest plot. | Tables 1 and 2     |
| Synthesis of results          | 21 | Present results of each meta-analysis done, including confidence intervals and measures of consistency.                                                                                                  | NA                 |
| Risk of bias across studies   | 22 | Present results of any assessment of risk of bias across studies (see Item 15).                                                                                                                          | Table 4            |
| Additional analysis           | 23 | Give results of additional analyses, if done (e.g., sensitivity or subgroup analyses, meta-regression [see Item 16]).                                                                                    | 11-12, Table 3     |
| <b>DISCUSSION</b>             |    |                                                                                                                                                                                                          |                    |
| Summary of evidence           | 24 | Summarize the main findings including the strength of evidence for each main outcome; consider their relevance to key groups (e.g., healthcare providers, users, and policy makers).                     | Table 3, 34-39     |
| Limitations                   | 25 | Discuss limitations at study and outcome level (e.g., risk of bias), and at review-level (e.g., incomplete retrieval of identified research, reporting bias).                                            | 45-46              |
| Conclusions                   | 26 | Provide a general interpretation of the results in the context of other evidence, and implications for future research.                                                                                  | 40-47              |
| <b>FUNDING</b>                |    |                                                                                                                                                                                                          |                    |

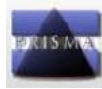

# PRISMA 2009 Checklist

|         |    |                                                                                                                                            |    |
|---------|----|--------------------------------------------------------------------------------------------------------------------------------------------|----|
| Funding | 27 | Describe sources of funding for the systematic review and other support (e.g., supply of data); role of funders for the systematic review. | 47 |
|---------|----|--------------------------------------------------------------------------------------------------------------------------------------------|----|

From: Moher D, Liberati A, Tetzlaff J, Altman DG, The PRISMA Group (2009). Preferred Reporting Items for Systematic Reviews and Meta-Analyses: The PRISMA Statement. PLoS Med 6(7): e1000097. doi:10.1371/journal.pmed1000097  
For more information, visit: [www.prisma-statement.org](http://www.prisma-statement.org).

Page 2 of 2

For peer review only

# BMJ Open

## A systematic review of nutrigenetics, omega-3 and plasma 2 lipids/lipoproteins/apolipoproteins with evidence evaluation using the GRADE approach

|                                 |                                                                                                                                                                                                                                                                                                                                                                                                                                                                                                                                                                                                                                                                                                                                                                                                                                                                                                                                                                                                                                                                                                                                                                                                                                                                                       |
|---------------------------------|---------------------------------------------------------------------------------------------------------------------------------------------------------------------------------------------------------------------------------------------------------------------------------------------------------------------------------------------------------------------------------------------------------------------------------------------------------------------------------------------------------------------------------------------------------------------------------------------------------------------------------------------------------------------------------------------------------------------------------------------------------------------------------------------------------------------------------------------------------------------------------------------------------------------------------------------------------------------------------------------------------------------------------------------------------------------------------------------------------------------------------------------------------------------------------------------------------------------------------------------------------------------------------------|
| Journal:                        | <i>BMJ Open</i>                                                                                                                                                                                                                                                                                                                                                                                                                                                                                                                                                                                                                                                                                                                                                                                                                                                                                                                                                                                                                                                                                                                                                                                                                                                                       |
| Manuscript ID                   | bmjopen-2021-054417.R1                                                                                                                                                                                                                                                                                                                                                                                                                                                                                                                                                                                                                                                                                                                                                                                                                                                                                                                                                                                                                                                                                                                                                                                                                                                                |
| Article Type:                   | Original research                                                                                                                                                                                                                                                                                                                                                                                                                                                                                                                                                                                                                                                                                                                                                                                                                                                                                                                                                                                                                                                                                                                                                                                                                                                                     |
| Date Submitted by the Author:   | 21-Oct-2021                                                                                                                                                                                                                                                                                                                                                                                                                                                                                                                                                                                                                                                                                                                                                                                                                                                                                                                                                                                                                                                                                                                                                                                                                                                                           |
| Complete List of Authors:       | Keathley, Justine; Université Laval, Centre Nutrition, Santé et Société (NUTRISS), Institut sur la Nutrition et les Aliments Fonctionnels (INAF) Quebec, QC, CAN; Université Laval, School of Nutrition Quebec, QC, CAN<br>Garneau, Véronique; Université Laval, Centre Nutrition, Santé et Société (NUTRISS), Institut sur la Nutrition et les Aliments Fonctionnels (INAF); Université Laval, School of Nutrition<br>Marcil, Valérie ; University of Montreal, Department of Nutrition; Sainte-Justine University Health Centre, Research Centre<br>Mutch, David; University of Guelph, Department of Human Health and Nutritional Sciences<br>Robitaille, Julie; Laval University, Centre Nutrition, Santé et Société (NUTRISS), Institut sur la Nutrition et les Aliments Fonctionnels (INAF); Laval University, School of Nutrition<br>Rudkowska, Iwona; Université Laval, Department of Kinesiology; Centre de recherche du CHU de Québec-Université Laval, Endocrinology and Nephrology Unit<br>Sofian, Gabriela; Université Laval, Library<br>Desroches, Sophie; Université Laval<br>Vohl, Marie-Claude; Université Laval, Centre Nutrition, Santé et Société (NUTRISS), Institut sur la Nutrition et les Aliments Fonctionnels (INAF); Université Laval, School of Nutrition |
| <b>Primary Subject Heading</b>: | Nutrition and metabolism                                                                                                                                                                                                                                                                                                                                                                                                                                                                                                                                                                                                                                                                                                                                                                                                                                                                                                                                                                                                                                                                                                                                                                                                                                                              |
| Secondary Subject Heading:      | Cardiovascular medicine, Genetics and genomics, Nutrition and metabolism                                                                                                                                                                                                                                                                                                                                                                                                                                                                                                                                                                                                                                                                                                                                                                                                                                                                                                                                                                                                                                                                                                                                                                                                              |
| Keywords:                       | NUTRITION & DIETETICS, GENETICS, Lipid disorders < DIABETES & ENDOCRINOLOGY                                                                                                                                                                                                                                                                                                                                                                                                                                                                                                                                                                                                                                                                                                                                                                                                                                                                                                                                                                                                                                                                                                                                                                                                           |
|                                 |                                                                                                                                                                                                                                                                                                                                                                                                                                                                                                                                                                                                                                                                                                                                                                                                                                                                                                                                                                                                                                                                                                                                                                                                                                                                                       |

SCHOLARONE™  
Manuscripts



I, the Submitting Author has the right to grant and does grant on behalf of all authors of the Work (as defined in the below author licence), an exclusive licence and/or a non-exclusive licence for contributions from authors who are: i) UK Crown employees; ii) where BMJ has agreed a CC-BY licence shall apply, and/or iii) in accordance with the terms applicable for US Federal Government officers or employees acting as part of their official duties; on a worldwide, perpetual, irrevocable, royalty-free basis to BMJ Publishing Group Ltd ("BMJ") its licensees and where the relevant Journal is co-owned by BMJ to the co-owners of the Journal, to publish the Work in this journal and any other BMJ products and to exploit all rights, as set out in our [licence](#).

The Submitting Author accepts and understands that any supply made under these terms is made by BMJ to the Submitting Author unless you are acting as an employee on behalf of your employer or a postgraduate student of an affiliated institution which is paying any applicable article publishing charge ("APC") for Open Access articles. Where the Submitting Author wishes to make the Work available on an Open Access basis (and intends to pay the relevant APC), the terms of reuse of such Open Access shall be governed by a Creative Commons licence – details of these licences and which [Creative Commons](#) licence will apply to this Work are set out in our licence referred to above.

Other than as permitted in any relevant BMJ Author's Self Archiving Policies, I confirm this Work has not been accepted for publication elsewhere, is not being considered for publication elsewhere and does not duplicate material already published. I confirm all authors consent to publication of this Work and authorise the granting of this licence.

1 *A systematic review of nutrigenetics, omega-3 and plasma*  
2 *lipids/lipoproteins/apolipoproteins with evidence evaluation using the*  
3 *GRADE approach*

4 Justine Keathley, PhD, RD<sup>1,2</sup>; Véronique Garneau, MSc, RD<sup>1</sup>; Valérie Marcil<sup>3,4</sup>, PhD, David M  
5 Mutch, PhD<sup>5</sup>, Julie Robitaille, PhD, RD<sup>1,2</sup>, Iwona Rudkowska, PhD, RD<sup>6,7</sup>, Gabriela Sofian,  
6 MSI<sup>8</sup>, Sophie Desroches, PhD, RD<sup>1,2</sup>; **Marie-Claude Vohl, PhD<sup>1,2</sup>\*\***

7 <sup>1</sup> Centre Nutrition, Santé et Société (NUTRISS), Institut sur la Nutrition et les Aliments  
8 Fonctionnels (INAF), Université Laval, Québec City, Québec, G1V 0A6, Canada

9 <sup>2</sup> School of Nutrition, Université Laval, Québec City, Québec, G1V 0A6, Canada

10 <sup>3</sup> Research Centre, Sainte-Justine University Health Centre, Montréal, Québec, H3T 1C5, Canada

11 <sup>4</sup> Department of Nutrition, Université de Montréal, Montréal, Québec, H3T 1J4, Canada

12 <sup>5</sup> Department of Human Health and Nutritional Sciences, University of Guelph, Guelph, Ontario,  
13 N1G 2W1, Canada

14 <sup>6</sup> Endocrinology and Nephrology Unit, CHU de Québec-Université Laval Research Center, Québec  
15 City, Québec, G1V 0A6, Canada

16 <sup>7</sup> Department of Kinesiology, Université Laval, Québec City, Québec, G1V 0A6, Canada

17 <sup>8</sup> Library, Université Laval, Québec City, Québec, G1V 0A6, Canada

18 **\*\*Corresponding Author: marie-claude.vohl@fsaa.ulaval.ca; Tel.: +1-418-656-2131 (ext.**  
19 **404676)**

20 **Ethics Approval Statement:** No ethics approval was required for a systematic review.

21 **Running Head:** Nutrigenetics, omega-3 and lipids/lipoproteins

22 Data described in the manuscript will be made available upon request pending approval  
23 from the corresponding author.

24 **Abbreviations:** ALA (alpha-linolenic acid); CV (coefficient of variation); DHA  
25 (docosahexaenoic acid); EPA (eicosapentaenoic acid); FDA (Food and Drug  
26 Administration); GRADE (Grading of Recommendations Assessment, Development and  
27 Evaluation); HCP (healthcare professional); LD (linkage disequilibrium); nutri-GRS  
28 (nutrigenetic risk score); SNP (single nucleotide polymorphism)

## 29 ABSTRACT

30 **Objectives:** Despite the uptake of nutrigenetic testing through direct-to-consumer  
31 services and healthcare professionals, systematic reviews determining scientific validity  
32 are limited in this field. The objective of this review was to: retrieve, synthesize and  
33 assess the quality of evidence (confidence) for nutrigenetic approaches related to the  
34 effect of genetic variation on plasma lipid, lipo- and apolipoprotein responsiveness to  
35 omega-3 fatty acid intake.

36 **Design:** A systematic review was conducted using three search engines (Embase, Web of  
37 Science and Medline) for articles published up until August 1, 2020. Included studies for  
38 the narrative synthesis assessed any nutrigenetic associations/interactions for genetic  
39 variants influencing the plasma lipid, lipo- and/or apolipoprotein response to omega-3  
40 fatty acid intake in humans (adult and pediatric). Specific nutrigenetic  
41 associations/interactions were then prioritized for evidence grading if they had been  
42 reported in at least two independent studies. Risk of bias was assessed in individual  
43 studies. Evidence was evaluated using the GRADE approach. This systematic review was  
44 registered with PROSPERO (CRD42020185087).

45 **Results:** Out of 1830 articles screened, 65 met the inclusion criteria for the narrative  
46 synthesis ( $n=23$  observational,  $n=42$  interventional); of these, 25 met the inclusion  
47 criteria for evidence evaluation using GRADE. Overall, current evidence is insufficient  
48 for gene-diet associations related to omega-3 fatty acid intake on plasma apolipoproteins,  
49 total cholesterol, HDL-cholesterol, LDL-cholesterol and LDL particle size. However,  
50 there is strong (GRADE rating: moderate quality) evidence to suggest that male *APOE*-  
51 E4 carriers (rs429358, rs7412) exhibit significant triglyceride reductions in response to  
52 omega-3-rich fish oil with a dose-response effect. Moreover, strong (GRADE rating: high  
53 quality) evidence suggests that a 31-SNP nutrigenetic risk score can predict plasma  
54 triglyceride responsiveness to omega-3-rich fish oil in adults with overweight/obesity  
55 from various ethnicities.

56 **Conclusions:** Most evidence in this area is weak, but two specific nutrigenetic  
57 interactions exhibited strong evidence, with limited generalizability to specific  
58 populations.

59 **Keywords:** nutrigenomics, nutrigenetics, nutritional genomics, genetic risk score,  
60 nutrigenetic risk score, triglycerides, lipids, lipoproteins, omega-3 fatty acid, *APOE*

## 61 STRENGTHS AND LIMITATIONS

- 62 - Strength: Comprehensive systematic review guided by PRISMA
- 63 - Strength: Critical appraisal of the evidence guided by GRADE
- 64 - Limitation: Inability to conduct a meta-analysis given the comprehensive  
65 overview of studies and thus heterogeneity
- 66 - Limitation: Several included studies without replication; most evidence was low  
67 or very low quality according to GRADE

## 68 INTRODUCTION

69  
70 Cardiometabolic disease is a health concern worldwide (1). Nutrigenetic research  
71 demonstrates that there is significant inter-individual variability in cardiometabolic risk  
72 factor levels, in part based on a combination of genetic and nutrition-related risk factors  
73 (2,3). For example, protein intake has consistently been shown to influence measures of  
74 body weight and composition dependent on *FTO* genotype (rs9939609 or loci in strong  
75 linkage disequilibrium) (4,5). Consumers indicate great interest in personalized nutrition  
76 based on genetics (6,7), however, a lack of industry oversight (8,9) has led to highly  
77 variable scientific validity of nutrigenetic tests available to consumers. While recognizing  
78 that some groups question whether genetic testing for personalized nutrition is ready for  
79 ‘prime time’, Gorman and colleagues suggested that there are certain specific nutrigenetic  
80 interactions with strong evidence that could be considered for implementation into  
81 clinical practice by expert committees who are responsible for creating dietary guidelines  
82 (10). With this in mind, systematic reviews that include an evaluation of levels of  
83 evidence are urgently needed in order to determine if there are any nutrigenetic  
84 associations that may warrant potential implementation into practice.

85 The dominant omega-3 polyunsaturated fatty acids are eicosapentaenoic acid (EPA) and  
86 docosahexaenoic acid (DHA), which typically come from marine sources (e.g. fish oil),  
87 and alpha-linolenic acid (ALA), which are rich in plant sources (e.g., canola oil) (11,12).  
88 It is well established that higher intakes of omega-3 fatty acids from foods or  
89 supplements (herein after referred to collectively as “omega-3s”), particularly from long-  
90 chain EPA and DHA, tend to improve indicators of cardiometabolic health (12,13). In

1  
2  
3 91 terms of their lipid and lipoprotein lowering effects, omega-3s have consistently  
4  
5 92 demonstrated an impact on triglycerides (TG) (14). High-quality evidence from  
6  
7 93 population-based studies suggests that long-chain omega-3s (EPA and DHA) reduce  
8  
9 94 plasma TG by about 15% (14). There is also high-quality evidence suggesting that EPA  
10  
11 95 and DHA can raise high-density lipoprotein (HDL) cholesterol (14). Other studies have  
12  
13 96 further demonstrated a relationship between omega-3 and HDL-cholesterol (15), low-  
14  
15 97 density lipoprotein (LDL)-cholesterol (15), total cholesterol (16–18), apolipoproteins  
16  
17 98 (19), and LDL particle size (20). Despite several studies with significant findings for  
18  
19 99 these outcomes, when reviewing the evidence, studies have demonstrated conflicting  
20  
21 100 results for the impact of omega-3 on many lipid profile outcomes (14). Genetic variation  
22  
23 101 could explain this heterogeneity. EPA and DHA have been shown to significantly impact  
24  
25 102 the expression of thousands of genes including those involved in inflammatory and  
26  
27 103 atherogenic pathways (21,22). Evidence now demonstrates that the health impacts of  
28  
29 104 omega-3 intake could differ based on genetic variation (23,24). Despite the potential for  
30  
31 105 omega-3s to have a significant positive impact on health outcomes, population intakes of  
32  
33 106 omega-3s tend to be low (25). While the World Health Organization's Adequate Intake  
34  
35 107 level for adults is 200-250 mg EPA+DHA daily (26,27), the mean reported intake of  
36  
37 108 EPA+DHA in the United States is only approximately 100 mg daily (25). Nutrigenetic  
38  
39 109 interventions have the potential to motivate improvements in dietary intake beyond  
40  
41 110 population-based interventions (28). Additionally, evidence suggests that genetic  
42  
43 111 variability affects health responses to omega-3s (23). Thus, critically appraising and  
44  
45 112 grading the evidence for nutrigenetic interactions related to omega-3s and plasma lipids,  
46  
47 113 lipoproteins and apolipoproteins is an important research priority. The most recent  
48  
49  
50  
51  
52  
53  
54  
55  
56  
57  
58  
59  
60



1  
2  
3 114 systematic review on nutrigenetic interactions related to omega-3s and intermediate  
4  
5 115 phenotypes of cardiovascular disease was conducted nearly a decade ago, and this study  
6  
7  
8 116 did not evaluate the quality of evidence using an established methodology (29).  
9  
10 117 Therefore, we aimed to provide a comprehensive summary of current evidence related to  
11  
12 118 inter-individual variability in plasma lipid, lipoprotein and apolipoprotein responses to  
13  
14  
15 119 omega-3 intake (plant and marine sources) based on genetic variations. Overall, the  
16  
17 120 specific objectives of this study were as follows:

18  
19  
20 121 **Objective 1.** Systematically search, identify (select), and provide a narrative  
21  
22 122 synthesis of all studies that assessed nutrigenetic associations/interactions for genetic  
23  
24 123 variants (comparators) influencing the plasma lipid, lipoprotein and/or apolipoprotein  
25  
26 124 response (outcomes) to omega-3 fatty acid intake (intervention/exposure) in humans –  
27  
28  
29 125 both pediatric and adult populations (population).

30  
31  
32  
33 126 **Objective 2.** Assess the overall quality of evidence for specific priority nutrigenetic  
34  
35 127 associations/interactions based on the following inclusion criteria: nutrigenetic  
36  
37 128 associations/interactions reported for the same genetic variants (comparators)  
38  
39 129 influencing the same plasma lipid, lipoprotein and/or apolipoprotein response  
40  
41 130 (outcomes) to omega-3 fatty acid intake (intervention/exposure) in humans – both  
42  
43 131 pediatric and adult populations (population) in two independent studies, irrespective  
44  
45  
46 132 of the findings.

47  
48  
49  
50 133

## 51 52 53 134 **Methods**

54 135

55 136 **Patient and Public Involvement:** No patient involvement.  
56  
57  
58  
59  
60

1  
2  
3 137 *Literature Search*  
4  
5

6 138 The systematic review protocol was registered with PROSPERO (CRD42020185087).  
7  
8  
9 139 The review process was guided by previously established methods, including a  
10  
11 140 previously outlined five-step systematic review process (30,31). The search engines  
12  
13 141 Embase, Web of Science and Medline OVID were used to conduct the search starting in  
14  
15 142 May 2020 and screen for articles meeting inclusion criteria, using the comprehensive  
16  
17 143 search terms outlined in Supplementary Table 1, properly combined by Boolean  
18  
19 144 operators. The literature was searched up until August 1, 2020. A PRISMA diagram  
20  
21 145 (Figure 1) guided the article screening process (32).  
22  
23  
24  
25

26 146 *Inclusion and Exclusion Criteria*  
27  
28

29 147 Original studies were included if they were written in English or French. Inclusion  
30  
31 148 criteria were developed using the Population, Intervention, Comparison, Outcomes,  
32  
33 149 (PICO) and Population, Exposure, Comparison, Outcomes (PECO) methods (33,34) for  
34  
35 150 interventional and observational research, respectively. These are detailed in Table 1 for  
36  
37 151 each study objective.  
38  
39  
40  
41

42 152 **Table 1. PICO/PECO for Study Objectives**  
43  
44

| PICO/PECO for Objective 1:  |                                                                                                    |
|-----------------------------|----------------------------------------------------------------------------------------------------|
| Population                  | Human studies (adult and pediatric)                                                                |
| Intervention/<br>Exposure   | Omega-3s (total omega-3 or various types; supplemental and/or dietary intake)                      |
| Comparison                  | Genetic variation                                                                                  |
| Outcomes                    | HDL-cholesterol, LDL-cholesterol, LDL particle size, total cholesterol, apolipoproteins, and/or TG |
| PICO/PECO for Objective 2*: |                                                                                                    |
| Population                  | Human studies (adult and pediatric)                                                                |
| Intervention/               | Omega-3s (total omega-3 or various types; supplemental and/or dietary                              |

|            |                                                                                                                                                                                  |
|------------|----------------------------------------------------------------------------------------------------------------------------------------------------------------------------------|
| Exposure   | intake)                                                                                                                                                                          |
| Comparison | Genetic variation in the same genetic location [gene(s) and SNP(s)]                                                                                                              |
| Outcomes   | The same outcome of interest among studies with the same genetic comparators: HDL-cholesterol, LDL-cholesterol, LDL particle size, total cholesterol, apolipoproteins, and/or TG |

153 \*Nutrigenetic associations/interactions were included in objective 2, **in the evidence grading**  
 154 **process**, irrespective of the findings, provided that they had been reported in at least two  
 155 independent studies on the same gene(s) and SNP(s), and the same plasma outcome.

156 There were no limitations to the population characteristics (all populations/patient  
 157 samples were included). Animal studies were excluded. Dietary interventions and  
 158 observational studies involving omega-3s (total omega-3 or various types; supplemental  
 159 and/or dietary intake) and comparing lipid and/or lipoprotein and/or apolipoprotein  
 160 outcomes between different genetic variations based on omega-3 dietary or supplemental  
 161 intake (and not blood fatty acid levels; e.g. EPA and DHA in red blood cells) were  
 162 included in the narrative synthesis. In included studies, samples had to be stratified on the  
 163 basis of genetic variation. Specific lipid and lipoprotein outcomes of interest were: HDL-  
 164 cholesterol, LDL-cholesterol, LDL particle size, total cholesterol, apolipoproteins, and  
 165 triglycerides (TG). Studies that reported ratios of the aforementioned lipid parameters  
 166 (e.g. HDL-cholesterol to total cholesterol ratio) were also included. Both observational  
 167 and interventional studies were included, as well as single-gene, polygenic and genome-  
 168 wide association studies (GWAS). Differences in study designs and methods were  
 169 considered when developing the overall evidence grades, as further detailed below.

170 Associations/interactions reported in two independent studies formed the basis of the  
 171 inclusion criteria for objective 2, in which nutrigenetic associations/interactions were  
 172 prioritized for evidence grading. This is further detailed in Table 1 and the section below  
 173 entitled “Evidence Grading.”

174 *Article Selection and Data Extraction*

1  
2  
3 175 Two independent investigators (JK and VG) screened articles using the computer  
4  
5 176 software *Covidence* (including title, abstract, and full-text screening) and extracted data  
6  
7 177 from the included articles. Reference lists of included articles and of a systematic review  
8  
9 178 on a similar topic (35) were also screened for relevant articles. Data extraction templates  
10  
11 179 were piloted by two independent investigators (JK and VG) on ten included studies and  
12  
13 180 revised accordingly. The final data extraction templates included the following  
14  
15 181 components for each study: first author name and year, study design, genetic approach,  
16  
17 182 population and sample size, study duration (interventional studies only), genes and single  
18  
19 183 nucleotide polymorphisms (SNPs) analyzed with rs numbers, quantity and type of  
20  
21 184 omega-3, comparisons (e.g. a control group or different amount/type of omega-3s as well  
22  
23 185 as genetic grouping), lipid/lipoprotein outcome(s), whether or not the study reported that  
24  
25 186 they followed STREGA guidelines and a summary of statistically significant study  
26  
27 187 findings relevant to the research question. Corresponding authors of included studies  
28  
29 188 were contacted as needed to provide clarity and/or additional information about the  
30  
31 189 included studies.  
32  
33  
34  
35  
36  
37

### 38 190 *Evidence Grading*

39  
40  
41  
42 191 Upon reading all full-text articles included, and summarizing the body of evidence  
43  
44 192 (Tables 2 and 3), SNPs/nutrigenetic risk scores (nutri-GRSs) and subsequent  
45  
46 193 lipid/lipoprotein/apolipoprotein outcomes were systematically prioritized and selected for  
47  
48 194 evidence grading, if a specific nutrigenetic association/interaction was reported in at least  
49  
50 195 two independent studies. To clarify, this refers to the same SNP(s)/nutri-GRS [or SNPs  
51  
52 196 in strong linkage disequilibrium (LD)] being assessed and influencing the same  
53  
54 197 lipid/lipoprotein outcome in at least two studies. For these nutrigenetic  
55  
56  
57  
58  
59  
60

1  
2  
3 198 associations/interactions, we proceeded with evidence grading, while including **all**  
4  
5 199 studies relevant to the particular nutrigenetic association/interaction, irrespective of the  
6  
7 200 findings. Consistency of results was then one of several factors considered when grading  
8  
9 201 the body of evidence. The Grading of Recommendations Assessment, Development and  
10  
11 202 Evaluation (GRADE) approach indicates that a single study rarely (if ever) results in  
12  
13 203 strong evidence, but two studies (typically RCTs) can indicate strong evidence if they are  
14  
15 204 graded highly using the GRADE criteria (36). Prior to selecting the nutrigenetic  
16  
17 205 associations/interactions (genetic variants and lipid/lipoprotein/apolipoprotein outcomes)  
18  
19 206 for evidence grading, LD was assessed using the SNIPA SNP Annotator Software (37)  
20  
21 207 for genes located on the same chromosome and arm (determined using the Online  
22  
23 208 Mendelian Inheritance in Man® [OMIM] database) as outlined in the summary of  
24  
25 209 results' tables in the column labelled 'Cytogenic Location of Gene(s)' (Tables 1 and 2).  
26  
27 210 Strong LD was defined as  $r^2 > 0.8$  and location  $< 250$  kb away from the index SNP  
28  
29 211 location. SNPs in strong LD were considered together for the purposes of evidencing  
30  
31 212 grading.

32  
33 213 Based on our abovementioned predetermined criteria for specific nutrigenetic topic  
34  
35 214 selection for evidence grading, nutrigenetic associations/interactions that were not  
36  
37 215 included in the evidence grading process likely have weak evidence (at minimum due to  
38  
39 216 lack of replication, for example, *ZNT8* rs13266634 and HDL-c or TG responsiveness to  
40  
41 217 omega-3, which has only been assessed in a single study (38)). According to the GRADE  
42  
43 218 guidelines, when only a single study exists indicating significant findings for an outcome  
44  
45 219 of interest (especially when the study is observational), the overall quality of the evidence  
46  
47 220 is generally rated to be low or very low (39). Therefore, our process for prioritizing  
48  
49  
50  
51  
52  
53  
54  
55  
56  
57  
58  
59  
60

221 nutrigenetic topics for evidence grading aimed to filter out specific nutrigenetic  
222 associations/interactions that would likely be deemed low or very low quality (based on,  
223 at minimum, lack of replication). Two authors (JK and VG) critically appraised the  
224 selected nutrigenetic interactions using the GRADE methodology (39,40). Nutrigenetic  
225 interactions were grouped according to studies assessing the same SNP(s)/nutri-GRS and  
226 lipid/lipoprotein/apolipoprotein outcome, and the quality of the body of evidence (studies  
227 with significant and non-significant results) was rated; this process was guided by the  
228 GRADE Evidence Profile, which included consideration of risk of bias, inconsistency,  
229 indirectness, imprecision, publication bias, plausible confounding, dose-response and  
230 other factors (39). For example, different sources of omega-3s (e.g. EPA+DHA vs. ALA;  
231 food sources vs. supplementation) were taken into consideration when grading the  
232 evidence through the analysis of indirectness within the GRADE approach (39,40). Risk  
233 of bias was assessed in each of the included interventional and observational studies  
234 using the National Institutes of Health Study Quality Assessment Tools, in line with  
235 recently published recommendations for risk of bias assessments (41). To assess  
236 measures of precision, coefficients of variation (CV) were calculated based on outcome  
237 means (mean change or absolute values – whichever was used for the analyses) and  
238 standard deviations. In cases where standard errors of the mean were reported, these were  
239 converted to standard deviations to calculate the CV. The nutrigenetic interactions were  
240 each given an evidence grade of high, moderate, low or very low.

## 241 **Results**

242  
243 Figure 1 outlines the PRISMA Flow Diagram, which was used to guide the systematic  
244 review. Supplementary Tables 2 and 3 provide a summary of the 65 included studies. The

1  
2  
3 245 results columns of Supplementary Tables 2 and 3 (far right) indicate nutrigenetic findings  
4  
5 246 that were statistically significant. Any results related to the studies' analyzed SNPs and  
6  
7  
8 247 outcomes of interest that were not statistically significant are not indicated in the results  
9  
10 248 column. No studies explicitly reported that they followed STREGA guidelines. LD  
11  
12 249 analysis of SNPs tested in different studies revealed strong LD in several SNPs from the  
13  
14 250 *FADS* gene cluster (see Table 2 footnote). As such, LD was taken into consideration in  
15  
16  
17 251 the selection of nutrigenetic interactions selected for evidence grading.

### 20 252 *Observational Studies*

21  
22  
23 253 Of the 65 included studies, 23 were observational with the majority of these being cross-  
24  
25 254 sectional, as outlined in Supplementary Table 2. A total of 62,221 participants were  
26  
27  
28 255 included in the observational studies. These studies assessed correlations among a  
29  
30 256 number of different genetic variations and outcomes, with several studies assessing  
31  
32 257 genetic variations in the *FADS* gene cluster (42–48), *TNF $\alpha$*  (49–51) and *PPAR $\alpha$*  (52–54).  
33  
34 258 Most studies (n=13) assessed total omega-3s (38,42,47–49,51,54–60). The intake and  
35  
36  
37 259 type of omega-3s, lipid/lipoprotein/apolipoprotein outcomes and associations revealed  
38  
39 260 from these studies were variable as further detailed in Supplementary Table 2. In the  
40  
41 261 observational studies assessing genetic variation in the *FADS* gene cluster, some studies  
42  
43 262 indicated significant gene-diet findings related to HDL-cholesterol, LDL-cholesterol, TG,  
44  
45 263 total-cholesterol while other studies demonstrated no significant gene-diet interactions for  
46  
47 264 these outcomes thus indicating notable inconsistency among the results, while  
48  
49 265 considering that SNPs differed by studies (42–48). In the observational studies focused  
50  
51 266 on genetic variation in the *TNF $\alpha$*  gene, there was some evidence of a gene-diet  
52  
53  
54 267 relationship for omega-3 and LDL-cholesterol, total-cholesterol and total-  
55  
56  
57  
58  
59  
60

1  
2  
3 268 cholesterol:HDL-cholesterol ratio, but again, results differed between studies (49–51).  
4  
5 269 For gene-diet relationships and *PPARα* genetic variation, individual studies indicated  
6  
7 270 significant findings related to total-cholesterol, LDL-cholesterol, TG, apoC-III and LDL  
8  
9  
10 271 peak particle diameter (52–54). Comprehensive details of the observational studies are  
11  
12 272 outlined in Supplementary Table 2.  
13  
14

### 15 273 *Interventional Studies*

16  
17  
18 274 Of the 65 included studies, 42 were interventional including 16 randomized trials. Non-  
19  
20 275 randomized studies included single arm clinical trials and sequential non-randomized  
21  
22 276 cross-over interventions. For interventional studies, n=6,225 participants upon combining  
23  
24 277 all sample sizes of the included studies. Again, these studies assessed relationships  
25  
26 278 between a number of different genetic variants and study outcomes. In more recent years,  
27  
28 279 several studies (n=8) used a nutri-GRS or polygenic approaches (61–68) given the  
29  
30 280 plausibility that many gene-lipid/lipoprotein/apolipoprotein and omega-3 interactions are  
31  
32 281 polygenic in nature. Numerous studies assessed genetic variations in the *FADS* gene  
33  
34 282 cluster (61,62,69–71), *APOE* (61,71–80), *CD36* (67,81,82), *PPARγ2* (62,67,83–85) and  
35  
36 283 *PPARα* (83,86,87). Among these studies, results related to significant gene-diet (omega-  
37  
38 284 3) associations influencing lipid/lipoprotein outcomes were generally inconsistent except  
39  
40 285 for *APOE* (rs429358 and rs7412), omega-3 and TG in males only (71–75,77–80), and for  
41  
42 286 a 31-SNP nutri-GRS, omega-3 and TG (65,66). There was also consistent evidence to  
43  
44 287 indicate a lack of association among *PPARγ2* (rs1801282) genetic variation, EPA+DHA  
45  
46 288 and LDL cholesterol (62,67,84,85,88). Most studies (n=40) used supplemental EPA  
47  
48 289 and/or DHA sources of omega-3s for the dietary intervention (see Supplementary Table  
49  
50 290 3). The dosage/intake and type of omega-3s were variable with EPA and/or DHA dosages  
51  
52  
53  
54  
55  
56  
57  
58  
59  
60



291 ranging from 0.5-3.7 g/day across different studies, and one study with an ALA  
292 intervention dosage of 8.1 g/day, as further detailed in Table 3.

### 293 *Levels of Evidence Using GRADE*

294 A total of 25 articles were included in the evidence grading process, representing 11  
295 unique nutrigenetic associations/interactions as outlined in Tables 2 and 3, and  
296 Supplementary Table 4. Through the GRADE process, it was determined that there is  
297 strong evidence (GRADE rating: moderate quality) for *APOE* genotypes (rs7412,  
298 rs429358), omega-3s and TG lowering in male adults only (71–75,77–80). This evidence  
299 suggests that adult males (but not females) with the *APOE*-E3/E4 or E4/E4 genotype  
300 (rs429358, rs7412) tend to experience significant reductions in TG in response to 0.7-3.7  
301 g/day of EPA and/or DHA, with higher dosages demonstrating greater TG lowering  
302 effects (71–75,77–80). Furthermore, it was determined that there is strong evidence  
303 (GRADE rating: high quality) for using a 31-SNP nutri-GRS (detailed in Supplementary  
304 Tables 5 and 6) to assess the effectiveness of omega-3s for TG lowering in adults with  
305 overweight/obesity in various ethnicities (65,66). The evidence suggests that in adults  
306 with overweight/obesity, lower genetic risk scores demonstrate greater responsiveness to  
307 omega-3 supplementation (65,66).

308 All other evidence that was evaluated was determined to be weak (GRADE rating: low or  
309 very low quality), as further detailed in Table 2. Imprecision, indirectness, and  
310 inconsistency were common reasons for downgrading the evidence (refer to Table 2  
311 footnote). There was evidence for a plausible mechanism of action for most of the  
312 nutrigenetic interactions that were graded; evidence of a dose response was less common.

**Table 2. GRADE Evidence Profile: Genetic Variation, Omega-3 and Lipids**

| Nutrigenetic interactions for omega-3 and plasma lipid/lipoprotein outcomes                                                                                                                                                                                             |                                  |                                    |                                   |                                       |                  |                           |                                   |                 |                                                                                                                                                                                            |
|-------------------------------------------------------------------------------------------------------------------------------------------------------------------------------------------------------------------------------------------------------------------------|----------------------------------|------------------------------------|-----------------------------------|---------------------------------------|------------------|---------------------------|-----------------------------------|-----------------|--------------------------------------------------------------------------------------------------------------------------------------------------------------------------------------------|
| <b>1 Patient or Population: adults</b><br><b>2 Intervention/Exposure: dietary or supplemental omega-3 (EPA and/or DHA and/or ALA)</b><br><b>3 Comparison/Control: genetic variation, different omega-3 intakes</b><br><b>4 Outcomes: plasma lipids and lipoproteins</b> |                                  |                                    |                                   |                                       |                  |                           |                                   |                 |                                                                                                                                                                                            |
| Gene rs Number and Lipid: Number and Type of Studies (total n)                                                                                                                                                                                                          | Limitations                      | Inconsistency                      | Indirectness                      | Imprecision                           | Publication Bias | Dose Response             | Biological Plausibility*          | Quality         | Conclusion                                                                                                                                                                                 |
| <b>5 CD36 rs1761667 and HDL-c:</b><br>1 RCT and 1 single arm trial (n=115) (81,89)                                                                                                                                                                                      | Serious limitations <sup>a</sup> | Serious inconsistency <sup>b</sup> | Serious indirectness <sup>c</sup> | Serious imprecision <sup>d</sup>      | Undetected       | No evidence of a gradient | Evidence of a mechanism of action | ⊕⊕⊕⊖ (Low)      | Weak evidence suggests that possessing the GA or possibly the AA genotype of <i>CD36</i> rs1761667 could lead to significant increases in HDL-c in response to 0.8-3.0 g/day of omega-3s.  |
| <b>6 CD36 rs1761667 and TG:</b><br>1 RCT and 1 single arm trial (n=115) (81,89)                                                                                                                                                                                         | Serious limitations <sup>a</sup> | Serious inconsistency <sup>b</sup> | Serious indirectness <sup>c</sup> | Serious imprecision <sup>e</sup>      | Undetected       | No evidence of a gradient | Evidence of a mechanism of action | ⊕⊕⊕⊖ (Low)      | Weak evidence suggests that possessing the GA or possibly the GG genotype of <i>CD36</i> rs1761667 could lead to significant reductions in TG in response to 0.8-3.0 g/day of omega-3s.    |
| <b>7 CD36 rs1049673 and HDL-c:</b><br>1 RCT and 1 single arm trial (n=115) (81,89)                                                                                                                                                                                      | Serious limitations <sup>a</sup> | Serious inconsistency <sup>b</sup> | Serious indirectness <sup>c</sup> | No serious imprecision                | Undetected       | No evidence of a gradient | Evidence of a mechanism of action | ⊕⊕⊕⊖ (Low)      | Weak evidence suggests that possessing the CG or possibly the CC genotype of <i>CD36</i> rs1049673 could lead to significant increases in HDL-c in response to 0.8-3.0 g/day of omega-3s.  |
| <b>8 CD36 rs1527483 and TG:</b><br>1 RCT and 1 single arm trial (n=250) (67,81)                                                                                                                                                                                         | Serious limitations <sup>f</sup> | No serious inconsistency           | Serious indirectness <sup>g</sup> | Very serious imprecision <sup>e</sup> | Undetected       | No evidence of a gradient | Evidence of a mechanism of action | ⊕⊕⊕⊖ (Low)      | Weak evidence suggests that possessing the GG genotype of <i>CD36</i> rs1527483 could lead to significant decreases in TG in response to approximately 2.0 g/day of EPA+DHA (but not ALA). |
| <b>9 APOE rs429358, rs7412 and TG:</b> 4 RCTs and 5 single arm trials (1 single arm trial consisted of a                                                                                                                                                                | No serious limitations           | No serious inconsistency           | Serious indirectness <sup>h</sup> | No serious imprecision                | Undetected       | Evidence of a gradient    | Evidence of a mechanism of action | ⊕⊕⊕⊕ (Moderate) | Strong evidence suggests that adult males (but not females) with the <i>APOE</i> -E3/E4 or E4/E4 genotype (rs429358, rs7412) experience significant reductions in TG in                    |

1  
2  
3  
4  
5  
6  
7  
8  
9  
10  
11  
12  
13  
14  
15  
16  
17  
18  
19  
20  
21  
22  
23  
24  
25  
26  
27  
28  
29  
30  
31  
32  
33  
34  
35  
36  
37  
38  
39  
40  
41  
42  
43  
44  
45  
46  
47

|                                                                                                                                                                                                                                           |                                        |                                         |                                        |                                  |            |                                     |                                                     |                                                                              |                                                                                                                                                                                                                                                                                                                                                                                                                                                  |
|-------------------------------------------------------------------------------------------------------------------------------------------------------------------------------------------------------------------------------------------|----------------------------------------|-----------------------------------------|----------------------------------------|----------------------------------|------------|-------------------------------------|-----------------------------------------------------|------------------------------------------------------------------------------|--------------------------------------------------------------------------------------------------------------------------------------------------------------------------------------------------------------------------------------------------------------------------------------------------------------------------------------------------------------------------------------------------------------------------------------------------|
| subset sample of another single arm trial) (n=980) (71-75,77-80)                                                                                                                                                                          |                                        |                                         |                                        |                                  |            |                                     |                                                     |                                                                              | response to 0.7-3.7 g/day of EPA and/or DHA. Higher dosages may have greater TG lowering effects.                                                                                                                                                                                                                                                                                                                                                |
| <b>APOE rs429358, rs7412 and Total-c:</b> 4 RCTs, 5 single arm trials (1 single arm trial consisted of a subset sample of another single arm trial), 1 cross-sectional and longitudinal analysis within an RCT (n=2,446) (55,71-75,77-80) | No serious limitations                 | Serious inconsistency <sup>i</sup>      | Serious indirectness <sup>h</sup>      | No serious imprecision           | Undetected | No evidence of a gradient           | Lack of evidence of a mechanism of action           | ⊕⊕⊕⊖<br>(Moderate: Males and Females)<br><br>and<br><br>⊕⊕⊖⊖<br>(Low: Males) | In males and females combined, strong evidence suggests that there is no nutrigenetic interaction between EPA and/or DHA, <i>APOE</i> (rs429358, rs7412) and total-c. There is no evidence of a nutrigenetic interaction between ALA, <i>APOE</i> (rs429358, rs7412) and total-c. In male subgroups, weak evidence suggests that there is no nutrigenetic interaction between ALA or EPA and/or DHA, <i>APOE</i> (rs429358, rs7412) and total-c. |
| <b>31-SNP Nutri-GRS and TG:</b> 1 RCT, 1 single arm trial (n=330) (65,66)                                                                                                                                                                 | No serious limitations                 | No serious inconsistency                | Serious indirectness <sup>j</sup>      | No serious imprecision           | Undetected | Evidence of a gradient <sup>k</sup> | Some evidence of a mechanism of action <sup>l</sup> | ⊕⊕⊕⊕<br>High                                                                 | Strong evidence suggests that in adults with overweight/obesity, a 31-SNP genetic risk score can predict TG responsiveness to EPA+DHA supplementation. Individuals with lower genetic risk scores demonstrate greater responsiveness to EPA+DHA for TG lowering.                                                                                                                                                                                 |
| <b>PPARG2 rs1801282 and LDL-c:</b> 4 RCTs, 1 single arm trial (n=670) (62,67,84,85,88)                                                                                                                                                    | No serious limitations                 | No serious inconsistency                | Serious indirectness <sup>m</sup>      | Serious imprecision <sup>n</sup> | Undetected | No evidence of a gradient           | Lack of evidence of a mechanism of action           | ⊕⊕⊕⊖<br>(Moderate)                                                           | Strong evidence suggests that genetic variation in <i>PPARG2</i> (rs1801282) does not influence LDL-c responses to omega-3s (EPA+DHA).                                                                                                                                                                                                                                                                                                           |
| <b>PPARG2 rs1801282 and Total-c:</b> 4 RCTs, 1 single arm trial (n=670) (62,67,84,85,88)                                                                                                                                                  | No serious limitations                 | Serious inconsistency <sup>o</sup>      | Serious indirectness <sup>m</sup>      | Serious imprecision <sup>n</sup> | Undetected | No evidence of a gradient           | Lack of evidence of a mechanism of action           | ⊕⊕⊖⊖<br>(Low)                                                                | Weak evidence suggests that possessing the CG or GG genotype of <i>PPARG2</i> (rs1801282) could lead to significant increases in total-c in response to approximately 3 g/day of omega-3s (EPA+DHA) in individuals with overweight or obesity, but not for individuals without overweight or obesity.                                                                                                                                            |
| <b>PPARG2 rs1801282 and TG:</b> 4 RCTs, 1 single arm trial (n=670) (62,67,84,85,88)                                                                                                                                                       | No serious limitations                 | Very serious inconsistency <sup>p</sup> | Serious indirectness <sup>m</sup>      | Serious imprecision <sup>n</sup> | Undetected | No evidence of a gradient           | Evidence of a mechanism of action                   | ⊕⊕⊖⊖<br>(Low)                                                                | Weak evidence suggests that genetic variation in <i>PPARG2</i> (rs1801282) does not influence total-c responses to omega-3s (EPA+DHA), but when dietary total fat and saturated fat intake are low, nutrigenetic interactions may exist.                                                                                                                                                                                                         |
| <b>FADS (rs174547**) and Total-c:</b> 2 RCTs, 1 single-arm trial, 4 cross-                                                                                                                                                                | Very serious risk of bias <sup>q</sup> | No serious inconsistency                | Very serious indirectness <sup>r</sup> | Serious imprecision <sup>n</sup> | Undetected | No evidence of a gradient           | Evidence of a mechanism of action                   | ⊕⊖⊖⊖<br>(Very Low)                                                           | Weak evidence suggests that genetic variation in <i>FADS</i> (rs174547**) does not influence total-c responses to omega-3.                                                                                                                                                                                                                                                                                                                       |

1  
2  
3  
4  
5  
6  
7  
8  
9  
10  
11  
12  
13  
14  
15  
16  
17  
18  
19  
20  
21  
22  
23  
24  
25  
26  
27  
28  
29  
30  
31  
32  
33  
34  
35  
36  
37  
38  
39  
40  
41  
42  
43  
44  
45  
46  
47

|                                                      |  |  |  |  |  |  |  |  |  |
|------------------------------------------------------|--|--|--|--|--|--|--|--|--|
| sectional studies (n=9365)<br>(44,45,47,48,61,69,71) |  |  |  |  |  |  |  |  |  |
|------------------------------------------------------|--|--|--|--|--|--|--|--|--|

\*Direct mechanisms of action were considered

\*\*FADS rs174547 was in strong LD with the following SNPs from other included studies and therefore these SNPs were also included in the selection of studies assessing FADS genetic variation, n-3 intake and LDL-c: rs174546, rs174599, rs174601, rs174583, rs1353, rs174561, rs174556, rs174545, rs174537 and rs174576.

HDL-c: high-density lipoprotein cholesterol, LDL-c: low-density lipoprotein cholesterol, TG: triglycerides, total-c: total cholesterol

- a. Small sample sizes, especially among homozygous groups in the RCT (with a larger heterozygous group, potentially affecting the results)
- b. Some variation in results by genotype
- c. One study sample consisted of all males while the other sample consisted of both men and women; differences in age and n-3 dosages (with some overlap)
- d. Coefficient of variation >1 for all significant values
- e. Coefficient of variation substantially >1 for several values
- f. Small sample size within genotype groups for minor allele homozygote and heterozygote groups in the RCT
- g. One study sample consisted of all men while the other consisted of men and postmenopausal women with type 2 diabetes
- h. Differences in age, omega-3 dosages, and types (with some overlap), and dietary interventions even when considering studies with male study samples separate from male + female study samples
- i. Serious inconsistency for men subgroup only; men + women samples were consistent
- j. EPA and DHA separate on one study and EPA+DHA in the other, sample stratified into two groups in one study (responders and non-responders) and separated into three groups (responders, non-responders and adverse responders)
- k. Evidence of a gradient for GRS and TG responsiveness to omega-3 supplementation
- l. Some evidence of a potential mechanism of action for *IQCJ-SCHIP1*, *NXP1*, *PHF17*, *MYB* and *NELL1* as discussed by Rudkowska et al. (63), Vallée Marcotte et al. (64)
- m. Differences in population (healthy adults, adults with chronic disease or obesity, infants), some variation in length of follow-up
- n. Downgraded precision as it was not possible to assess precision in most studies due to lack of reporting of means and SD/SEM
- o. Some variation in results even when considering differences in BMI and populations among studies
- p. Major variability in results even when considering differences in BMI and populations among studies
- q. Risk of bias detected in every study except one
- r. Major differences in populations, types and amounts of omega-3 and follow-up for interventional studies

**Table 3. Summary of Risk of Bias Across SNPs and Outcomes Following Omega-3 Exposure/Intervention**

| <i>CD36, rs1761667 and HDL-c</i>          |              |
|-------------------------------------------|--------------|
| Study                                     | Risk of Bias |
| Dawczynski et al. 2013                    | ⊖            |
| Madden et al. 2008                        | ⊖            |
| <i>CD36, rs1761667 and TG</i>             |              |
| Study                                     | Risk of Bias |
| Dawczynski et al. 2013                    | ⊖            |
| Madden et al. 2008                        | ⊖            |
| <i>CD36, rs1049673 and HDL-c</i>          |              |
| Study                                     | Risk of Bias |
| Dawczynski et al. 2013                    | ⊖            |
| Madden et al. 2008                        | ⊖            |
| <i>CD36, rs1527483 and TG</i>             |              |
| Study                                     | Risk of Bias |
| Zheng et al. 2018                         | ⊕            |
| Madden et al. 2008                        | ⊖            |
| <i>ApoE, rs429358, rs7412 and TG</i>      |              |
| Study                                     | Risk of Bias |
| AbuMweis et al. 2018                      | ⊖            |
| Carvalho-Wells et al. 2012                | ⊕            |
| Caslake et al. 2008                       | ⊕            |
| Dang et al. 2015                          | ⊕            |
| Jackson et al. 2012                       | ⊖            |
| Minihane et al. 2000                      | ⊕            |
| Olano-Martin et al. 2010                  | ⊕            |
| Paschos et al. 2005                       | ⊖            |
| Thifault et al. 2013                      | ⊕            |
| <i>ApoE, rs429358, rs7412 and Total-c</i> |              |
| Study                                     | Risk of Bias |
| AbuMweis et al. 2018                      | ⊖            |
| Carvalho-Wells et al. 2012                | ⊕            |
| Caslake et al. 2008                       | ⊕            |
| Dang et al. 2015                          | ⊕            |
| Fallaize et al. 2016                      | ⊖            |
| Jackson et al. 2012                       | ⊖            |
| Minihane et al. 2000                      | ⊕            |
| Olano-Martin et al. 2010                  | ⊕            |
| Paschos et al. 2005                       | ⊖            |
| Thifault et al. 2013                      | ⊕            |
| <i>31-SNP Nutri-GRS and TG</i>            |              |
| Study                                     | Risk of Bias |
| Vallée Marcotte et al. 2019               | ⊕            |
| Vallée Marcotte et al. 2020               | ⊕            |

| <i>PPARG2</i> , rs1801282 and LDL-c   |              |
|---------------------------------------|--------------|
| Study                                 | Risk of Bias |
| Binia et al. 2017                     | ⊖            |
| Harslof et al. 2014                   | ⊕            |
| Itariu et al. 2012                    | ⊕            |
| Lindi et al. 2003                     | ⊖            |
| Zheng et al. 2018                     | ⊕            |
| <i>PPARG2</i> , rs1801282 and Total-c |              |
| Study                                 | Risk of Bias |
| Binia et al. 2017                     | ⊖            |
| Harslof et al. 2014                   | ⊕            |
| Itariu et al. 2012                    | ⊕            |
| Lindi et al. 2003                     | ⊖            |
| Zheng et al. 2018                     | ⊕            |
| <i>PPARG2</i> , rs1801282 and TG      |              |
| Study                                 | Risk of Bias |
| Binia et al. 2017                     | ⊖            |
| Harslof et al. 2014                   | ⊕            |
| Itariu et al. 2012                    | ⊕            |
| Lindi et al. 2003                     | ⊖            |
| Zheng et al. 2018                     | ⊕            |
| <i>FADS</i> , rs174547 and Total-c    |              |
| Study                                 | Risk of Bias |
| AbuMweis et al. 2018                  | ⊖            |
| Alsaleh et al. 2014                   | ⊕            |
| Lu et al. 2010                        | ⊖            |
| Standl et al. 2012                    | ⊖            |
| Dumont et al. 2011                    | ⊖            |
| Dumont et al. 2018                    | ⊖            |
| Roke and Mutch 2014                   | ⊖            |

⊕ no serious risk of bias; ⊖ serious risk of bias; ⊖⊖ very serious risk of bias (for study design type using NIH Study Quality Assessment Tools)

HDL-c: high-density lipoprotein cholesterol, LDL-c: low-density lipoprotein cholesterol, TG: triglycerides, total-c: total cholesterol

1  
2  
3 271 **DISCUSSION**

4 272  
5 273 Overall, this systematic review found strong evidence (i.e. GRADE ratings: moderate and  
6  
7  
8 274 high quality evidence) for only a limited amount of evidence in this area: *APOE*  
9  
10 275 (rs429358 and rs7412) genotypes and TG responsiveness to omega-3s in men, and a 31-  
11  
12 276 SNP nutri-GRS and TG responsiveness to omega-3s in adults with overweight/obesity.  
13  
14 277 Limited evidence exists for individual genetic-based responsiveness of omega-3s on  
15  
16 278 apolipoprotein and/or LDL particle size, with no studies from the present comprehensive  
17  
18 279 review meeting the criteria for evidence grading. This highlights the need for more  
19  
20 280 replication studies in this area. While more research exists on omega-3 responsiveness for  
21  
22 281 other lipid outcomes such as total-c, HDL-c and LDL-c, the level of evidence for  
23  
24 282 nutrigenetic interactions related to these outcomes remains low. Again, more studies are  
25  
26 283 needed related to these outcomes, including replication studies of previously identified  
27  
28 284 nutrigenetic interactions. These studies should first replicate the interventions (i.e. use the  
29  
30 285 same type and amount of omega-3s as the original study), and recruit samples with  
31  
32 286 similar characteristics to the original study. Once replication is established, research  
33  
34 287 should then seek to expand the population studied to improve generalizability and explore  
35  
36 288 the effectiveness of different interventions (i.e. different formulations and doses of  
37  
38 289 omega-3s). The variability of the interventions and sample sizes in the studies conducted  
39  
40 290 to date often resulted in the quality of evidence being downgraded (see Table 2). It should  
41  
42 291 also be noted that study heterogeneity precluded the ability to conduct a meta-analysis.  
43  
44 292 Thus, the GRADE approach worked well for evaluating the quality of the evidence given  
45  
46 293 that this approach takes into consideration several factors when determining the quality of  
47  
48  
49  
50  
51  
52  
53  
54  
55  
56  
57  
58  
59  
60

1  
2  
3 294 evidence such as risk of bias, indirectness of evidence, inconsistency or results,  
4  
5 295 imprecision and publication bias (39).  
6  
7  
8 296  
9  
10 297 It is important to note that our results demonstrating strong evidence for interactions  
11  
12 298 between *APOE* genotypes and lipid responses to omega-3s have notable ethical  
13  
14 299 implications. Compared to non-carriers, carriers of *APOE*-E4 have a 15 times greater risk  
15  
16 300 of developing Alzheimer's disease (90). Moreover, *APOE* genotypes are significantly  
17  
18 301 associated with CVD risk including risk of coronary artery disease and hyperlipidemia  
19  
20 302 (91–93). Interestingly, the pathology of Alzheimer's disease has been linked to  
21  
22 303 cardiovascular mechanisms (90). Future research should explore nutrigenetic interactions,  
23  
24 304 with risk of developing Alzheimer's disease as the study endpoint/outcome of interest.  
25  
26 305 Despite the current lack of knowledge about how diet may play a role in mitigating the  
27  
28 306 genetic-based risk of Alzheimer's disease, several potentially modifiable risk factors  
29  
30 307 account for around 40% of dementia and Alzheimer's disease globally (94), and the link  
31  
32 308 between Alzheimer's disease risk and *APOE* is well-established (95). Therefore, despite  
33  
34 309 the strong scientific validity identified in the present review, there are other factors that  
35  
36 310 must be considered before this test can be recommended for implementation in a practice  
37  
38 311 setting; this includes ethical, legal and social implications (96).  
39  
40 312  
41  
42 313 In addition, our finding of strong evidence for *APOE* genotypes and TG responsiveness  
43  
44 314 to omega-3s in men but not women speaks to the importance of taking biological sex into  
45  
46 315 account in nutrigenetics research. The importance of this has been further highlighted  
47  
48 316 elsewhere, where it has been noted that the results of nutrition and nutrigenetic research  
49  
50  
51  
52  
53  
54  
55  
56  
57  
58  
59  
60



1  
2  
3 317 may differ in men and women (97). For example, UDP-glucuronidation isoenzyme  
4  
5 318 expression profiles have been demonstrated to be regulated by sex hormones, and thus  
6  
7 319 sex-specific differences in glucuronidation of resveratrol have been observed (98). As  
8  
9  
10 320 more studies are completed, researchers may find that certain nutrigenetic interactions  
11  
12 321 differ depending on biological sex, ethnicity, age or other factors, similar to our findings  
13  
14 322 on *APOE*, omega-3s and TG in which there was robust evidence of a nutrigenetic  
15  
16 323 interaction in males only. Researchers may also find explanations for this, which are  
17  
18 324 currently poorly understood. In general, it is becoming increasingly recognized that  
19  
20 325 health-related responses to different interventions may vary based on biological sex; this  
21  
22 326 is an important consideration of personalized nutrition (97). Nutrigenetic research often  
23  
24 327 groups men and women together, but stratifying based on biological sex could provide  
25  
26 328 further insights for specific nutrigenetic interactions and could also help explain why  
27  
28 329 some replication studies have had conflicting findings (97). Moreover, biomedical  
29  
30 330 research in general historically has been conducted more in men than women; yet such  
31  
32 331 research findings are often generalized to women despite limited research conducted in  
33  
34 332 samples of women, which is problematic for a number of reasons (99). In the present  
35  
36 333 review, the evidence was strong for the *APOE* findings in men only, but not women in  
37  
38 334 part because there were more studies conducted in men. Specifically, there were five  
39  
40 335 studies conducted in men and women (combined) (71,73,74,100,101), and four studies  
41  
42 336 conducted in samples of only men (75,78,79,102), yet no studies conducted in samples of  
43  
44 337 only women. This brings to light important issues of equity and warrants further  
45  
46 338 discussion and consideration.  
47  
48  
49  
50  
51  
52  
53  
54 339

1  
2  
3 340 As research continues to develop, it appears likely that lipid and lipoprotein responses are  
4  
5 341 polygenic in nature. Therefore, future research should consider using nutri-GRSs or other  
6  
7  
8 342 polygenic methods of assessing responsiveness to nutrition interventions. This work  
9  
10 343 should use unbiased approaches or non-hypothesis driven approach to derive nutri-GRSs,  
11  
12 344 such as establishing them from genetic-wide association studies. In addition to the two  
13  
14 345 studies meeting the criteria for evidence grading (65,66), a modified version of the 31-  
15  
16 346 SNP GRS was tested in men and women in the FINGEN study, using 23 of the 31 SNPs  
17  
18 347 (65). While this did not meet our inclusion criteria for evidence grading given that a  
19  
20 348 different GRS was used, the 23-SNP GRS was significantly associated with TG  
21  
22 349 responsiveness to omega-3 supplementation in this population as well, providing further  
23  
24 350 evidence for the scientific validity of this nutrigenetic interaction (65).  
25  
26  
27  
28  
29

351

30 352 While we used the GRADE approach to evaluate the body of evidence, several tools are  
31  
32 353 available for evaluating the quality of scientific evidence, though no generally accepted  
33  
34 354 methods exist for nutrigenetic research specifically. In 2017, Grimaldi et al. proposed a  
35  
36 355 set of guidelines to assess the scientific validity of genotype-based dietary advice (30).  
37  
38 356 While we originally intended to use these guidelines for assessing the evidence, we came  
39  
40 357 across some limitations that ultimately led us to use the GRADE guidelines. Specifically,  
41  
42 358 Grimaldi et al. (2017) suggested that only studies that include STREGA guidelines  
43  
44 359 should be included in the assessment of scientific validity (30). However, limiting the  
45  
46 360 evidence to only these studies could result in several important studies being missed. In  
47  
48 361 the present review, none of the included studies explicitly indicated that they followed  
49  
50 362 STREGA guidelines. In addition, it was recommended by Grimaldi et al. to use STREGA  
51  
52  
53  
54  
55  
56  
57  
58  
59  
60

1  
2  
3 363 guidelines to assess risk of bias (30). However, the STREGA checklist is only intended  
4  
5 364 for observational genetic association studies - not interventional research (103). In the  
6  
7  
8 365 present review, 42 of the 65 included studies were interventional (65%) (Supplementary  
9  
10 366 Table 3). In addition, the STREGA guidelines are intended to improve the transparency  
11  
12 367 and adequate reporting of genetic association studies, but it is not intended to be used as a  
13  
14  
15 368 study quality assessment tool (103). However, Grimaldi et al. nicely highlighted the  
16  
17 369 importance of understanding the nature of the genetic variation, at a functional level,  
18  
19 370 when assessing scientific validity (30). This is not included in the standard GRADE  
20  
21 371 approach but is an important niche component of nutrigenetic research. As such, an  
22  
23 372 analysis of functional SNPs (biological plausibility) was included as an additional  
24  
25 373 component of the standard GRADE process, as indicated in the methods section above.  
26  
27  
28 374 Overall, we found that the methods used in this systematic review were effective and can  
29  
30  
31 375 be used to synthesize and evaluate nutrigenetic studies assessing other gene-nutrient-  
32  
33 376 health outcome interactions.

34  
35 377

36  
37  
38 378 The additional consideration of functional SNPs to the standard GRADE approach helped  
39  
40 379 to strengthen this review, as biological mechanistic evidence can help ensure that study  
41  
42 380 findings did not occur by chance alone, and this is a component of evidence evaluation  
43  
44 381 frameworks in medical genetics (104,105). Transcriptomic and pathway analyses can  
45  
46 382 help inform the direction of future nutrigenetic studies by generating hypotheses about  
47  
48 383 the impact of specific genetic variations on varying responses to nutrition on health-  
49  
50 384 related outcomes. For example, using transcriptomics and pathway analyses to identify  
51  
52 385 changes in lipid metabolism following omega-3 supplementation, Rudkowska and  
53  
54  
55  
56  
57  
58  
59  
60

1  
2  
3 386 colleagues identified six genes expressed in opposite directions between responders and  
4  
5 387 non-responders to omega-3 supplementation for TG lowering: *FADS2*, *PLA2G4A*,  
6  
7 388 *ALOX15*, *PEMT*, *MGLL* and *GPAM* (106). Tremblay et al. then built on this knowledge  
8  
9  
10 389 and discovered that *PLA2G6* rs132989, *PLA2G7* rs679667, *PLA2G2D* rs12045689,  
11  
12 390 *PLA2G4A* rs10752979 and rs1160719 together explained 5.9% of post- omega-3  
13  
14 391 supplementation TG levels, with several individual *PLA2G4A* SNPs also having a  
15  
16 392 significant impact on the TG lowering effect of omega-3 supplementation (107). Others  
17  
18 393 have built on this mechanistic knowledge as well (108). Future research should now seek  
19  
20 394 to replicate this work given that we found that there have been no replication studies  
21  
22 395 completed and thus, this research (107,108) did not meet the criteria for evidence  
23  
24 396 grading.

25  
26  
27  
28 397  
29  
30 398 In the current body of literature, there are some limitations that should be highlighted.  
31  
32 399 Given the variability in allele frequencies for each SNP, it should be noted that study  
33  
34 400 limitations can arise with small sample sizes whereby some genotype groups may not be  
35  
36 401 adequately powered to detect significant differences. For example, Dawczynski et al.  
37  
38 402 (2013) detected significant changes in TG among the GA genotype group of *CD36*  
39  
40 403 rs1761667 (n=18) in response to omega-3s but neither of the homozygote groups (AA:  
41  
42 404 n=8, GG: n=7) exhibited a significant difference, despite similar directions and  
43  
44 405 magnitudes of effect among the GA and GG genotypes (82). It is thus possible that this  
45  
46 406 study was not adequately powered. Some researchers aim to mitigate this issue of small  
47  
48 407 numbers by grouping minor allele carriers together (i.e. heterozygotes + homozygotes for  
49  
50 408 the minor allele) (69). However, such an approach precludes the possibility to detect an  
51  
52  
53  
54  
55  
56  
57  
58  
59  
60

1  
2  
3 409 allele-dosage effect. From a physiological perspective, an allele dosage effect would be  
4  
5 410 expected whereby a significant change among a heterozygote group would likely be  
6  
7 411 accompanied by a significant change in one of the homozygote groups but with an even  
8  
9 412 greater magnitude of the effect. This consideration highlights the importance of having an  
10  
11 413 adequately powered sample size, while factoring in the prevalence of each genotype.  
12  
13  
14  
15 414

16  
17 415 While single SNP research provides important information about individual gene-nutrient  
18  
19 416 interactions, the results of this review indicate that individual responses to omega-3s for  
20  
21 417 altering lipids, lipoproteins and apolipoproteins appear to be polygenic in nature. Thus,  
22  
23 418 we encourage researchers to further explore the use of nutri-GRSs to improve the  
24  
25 419 accuracy of genetic-based predictions. See, for example, the work of Vallée Marcotte et  
26  
27 420 al., which obtained a high quality evidence grade in the present review (65,66). This is  
28  
29 421 further exemplified in the analyses recently conducted by Chen et al. (42), which has yet  
30  
31 422 to be replicated and thus was not selected for evidence grading.  
32  
33  
34  
35 423

36  
37 424 The present analysis of scientific validity provides an important first step towards the  
38  
39 425 eventual development of clinical practice guidelines for genetic-based responses to  
40  
41 426 dietary intake. With questionable and variable scientific validity of existing consumer  
42  
43 427 nutrigenetic tests, the development of clinical practice guidelines is an important next  
44  
45 428 step as these can be used by HCPs and industry alike to help promote evidence-based  
46  
47 429 practice in personalized nutrition. Ideally, industry should use future clinical practice  
48  
49 430 guidelines to inform the nutrigenetic associations and related dietary recommendations  
50  
51 431 included in their reports. Decision aids can also be useful to guide clinical practice for  
52  
53  
54  
55  
56  
57  
58  
59  
60

1  
2  
3 432 HCPs (109), and future research should seek to develop a decision aid related to omega-  
4  
5 433 3s and lipid/lipoprotein outcomes based on genetic variation.  
6  
7

8 434

9  
10 435 Overall, we have provided a comprehensive overview the body of evidence related to  
11  
12 436 nutrigenetics, omega-3s and plasma lipids/lipoproteins/apolipoproteins, while providing  
13  
14 437 an overview of levels of evidence in this field. To our knowledge, this is the first  
15  
16 438 systematic review with GRADE evidence evaluation in the broader field of nutrigenetics.  
17  
18

19 439 The results of this work should be used in clinical practice guideline development, to  
20  
21 440 ultimately guide evidence-based practice in personalized nutrition and move this  
22  
23 441 emerging field forward.  
24  
25

26 442

27 443 **Sources of Support:** J.K. received postdoctoral fellowships from the Canadian Institute of  
28 444 Health Research, NUTRISS and INAF. I.R. holds a Junior 2 research Scholar from the Fonds de  
29 445 recherche du Québec—Santé (FRQ-S). M-C.V. holds a Tier 1 Canada Research Chair in  
30 446 Nutrition Applied to Genetics and Metabolic Health.  
31  
32 447

33 448 **Contributorship Statements:** M-C.V. and J.K. conceptualized the review. G.S. was responsible  
34  
35 449 for the search strategy, in collaboration with J.K., M-C.V., S.D. and V.G. J.K. and V.G. were  
36  
37 450 responsible for article screening and selection, summarizing, evidence grading, and developing a  
38  
39 451 draft of the systematic review. The first systematic review draft underwent revisions from S.D. and  
40  
41 452 M-C.V., who provided overall supervision for the project. Following this, J.K., V.G., V.M.,  
42  
43 453 D.M.M., J.R., I.R., G.S., S.D., and M-C.V. served as scientific advisors and reviewed and revised  
44  
45 454 the full-text manuscript. J.K. wrote the first draft of the manuscript. J.K., V.G., V.M., D.M.M., J.R.,  
46  
47 455 I.R., G.S., S.D., and M-C.V., reviewed, revised and approved the final manuscript.  
48  
49

50 456 **Competing Interests:** The authors have no competing interests to declare.  
51  
52  
53  
54  
55  
56  
57  
58  
59  
60

1  
2  
3 457 **Funding:** This project was supported through a pilot projects grant from INAF. J Keathley was  
4  
5 458 supported through postdoctoral fellowships from CIHR (#430907), NUTRISS and INAF. M-C  
6  
7 459 Vohl holds a Canada Research Chair in Genomics Applied to Nutrition and Metabolic Health.  
8  
9

10 460 **Data Sharing Statement:** Data are available upon reasonable request.  
11  
12

13 461  
14  
15

16 462  
17  
18  
19  
20  
21  
22  
23  
24  
25  
26  
27  
28  
29  
30  
31  
32  
33  
34  
35  
36  
37  
38  
39  
40  
41  
42  
43  
44  
45  
46  
47  
48  
49  
50  
51  
52  
53  
54  
55  
56  
57  
58  
59  
60

For peer review only

1  
2  
3  
4  
5  
6  
7  
8  
9  
10  
11  
12  
13  
14  
15  
16  
17  
18  
19  
20  
21  
22  
23  
24  
25  
26  
27  
28  
29  
30  
31  
32  
33  
34  
35  
36  
37  
38  
39  
40  
41  
42  
43  
44  
45  
46  
47  
48  
49  
50  
51  
52  
53  
54  
55  
56  
57  
58  
59  
60

463 **Figure Legend:**

464  
465 **Figure 1. PRISMA Flow Diagram**

466 \*The original PRISMA Flow Diagram indicated the number of studies included in meta-analysis in this  
467 box. This has been revised for the purposes of this research

For peer review only



## References

1. Barquera S, Pedroza-Tobias A, Medina C, Hernandez-Barrera L, Bibbins-Domingo K, Lozano R, et al. Global overview of the epidemiology of atherosclerotic cardiovascular disease. *Arch Med Res*. 2015;46:328–38.
2. Rudkowska I, Guénard F, Julien P, Couture P, Lemieux S, Barbier O, et al. Genome-wide association study of the plasma triglyceride response to an n-3 polyunsaturated fatty acid supplementation. *J Lipid Res*. 2014 Jul;55(7):1245–53.
3. Rizzi F, Conti C, Dogliotti E, Terranegra A, Salvi E, Braga D, et al. Interaction between polyphenols intake and PON1 gene variants on markers of cardiovascular disease: a nutrigenetic observational study. *Journal of Translational Medicine*. 2016;14:186.
4. Zhang X, Qi Q, Zhang C, Smith SR, Hu FB, Sacks FM, et al. FTO Genotype and 2-Year Change in Body Composition and Fat Distribution in Response to Weight-Loss Diets: The POUNDS LOST Trial. *Diabetes*. 2012 Nov 1;61(11):3005–11.
5. Merritt DC, Jamnik J, El-Sohemy A. FTO genotype, dietary protein intake, and body weight in a multiethnic population of young adults: a cross-sectional study. *Genes Nutr*. 2018;13:4.
6. Vallée Marcotte B, Cormier V, Garneau V, Robitaille J, Desroches S, Vohl M-C. Nutrigenetic Testing for Personalized Nutrition: An Evaluation of Public Perceptions, Attitudes, and Concerns in a Population of French Canadians. *Lifestyle Genomics* [Internet]. 2019; Available from: <https://doi.org/10.1159/000499626>
7. Vallée Marcotte B, Cormier H, Garneau V, Robitaille J, Desroches S, Vohl M-C. Current knowledge and interest of French Canadians regarding nutrigenetics. *Genes Nutr*. 2019 Dec;14(1):5.
8. Caulfield T, McGuire AL. Direct-to-Consumer Genetic Testing: Perceptions, Problems, and Policy Responses. *Annu Rev Med*. 2012;63(1):23–33.
9. Horne J, Gilliland J, Madill J, Shelley J. A critical examination of legal and ethical considerations for nutrigenetic testing with recommendations for improving regulation in Canada: From science to consumer. *J Law Biosci*. 2020;
10. Görman U, Mathers JC, Grimaldi KA, Ahlgren J, Nordström K. Do we know enough? A scientific and ethical analysis of the basis for genetic-based personalized nutrition. *Genes Nutr*. 2013 Jul;8(4):373–81.
11. Harris WS. Stearidonic acid as a “pro-eicosapentaenoic acid.” *Curr Opin Lipidol*. 2012 Feb;23(1):30–4.
12. Shahidi F, Ambigaipalan P. Omega-3 Polyunsaturated Fatty Acids and Their Health Benefits. *Annu Rev Food Sci Technol*. 2018 25;9:345–81.

13. Hu Y, Hu FB, Manson JE. Marine Omega-3 Supplementation and Cardiovascular Disease: An Updated Meta-Analysis of 13 Randomized Controlled Trials Involving 127 477 Participants. *J Am Heart Assoc.* 2019;8(19):e013543.
14. Abdelhamid AS, Brown TJ, Brainard JS, Biswas P, Thorpe GC, Moore HJ, et al. Omega-3 fatty acids for the primary and secondary prevention of cardiovascular disease. *Cochrane Database Syst Rev* [Internet]. 2018 Jul 18 [cited 2020 Dec 1];2018(7). Available from: <https://www.ncbi.nlm.nih.gov/pmc/articles/PMC6513557/>
15. Jones PJH, Senanayake VK, Pu S, Jenkins DJA, Connelly PW, Lamarche B, et al. DHA-enriched high-oleic acid canola oil improves lipid profile and lowers predicted cardiovascular disease risk in the canola oil multicenter randomized controlled trial. *Am J Clin Nutr.* 2014 Jul;100(1):88–97.
16. Ballantyne CM, Bays HE, Kastelein JJ, Stein E, Isaacsohn JL, Braeckman RA, et al. Efficacy and Safety of Eicosapentaenoic Acid Ethyl Ester (AMR101) Therapy in Statin-Treated Patients With Persistent High Triglycerides (from the ANCHOR Study). *Am J Cardiol.* 2012 Oct 1;110(7):984–92.
17. Davidson MH, Stein EA, Bays HE, Maki KC, Doyle RT, Shalwitz RA, et al. Efficacy and tolerability of adding prescription omega-3 fatty acids 4 g/d to simvastatin 40 mg/d in hypertriglyceridemic patients: an 8-week, randomized, double-blind, placebo-controlled study. *Clin Ther.* 2007 Jul;29(7):1354–67.
18. Bradberry JC, Hilleman DE. Overview of Omega-3 Fatty Acid Therapies. *Pharm Ther.* 2013 Nov;38(11):681–91.
19. Skulas-Ray AC, Alaupovic P, Kris-Etherton PM, West SG. Dose-response effects of marine omega-3 fatty acids on apolipoproteins, apolipoprotein-defined lipoprotein subclasses, and Lp-PLA2 in individuals with moderate hypertriglyceridemia. *J Clin Lipidol.* 2015 Jun;9(3):360–7.
20. Lee MW, Park JK, Hong JW, Kim KJ, Shin DY, Ahn CW, et al. Beneficial Effects of Omega-3 Fatty Acids on Low Density Lipoprotein Particle Size in Patients with Type 2 Diabetes Already under Statin Therapy. *Diabetes Metab J.* 2013 Jun;37(3):207–11.
21. Bouwens M, van de Rest O, Dellschaft N, Bromhaar MG, de Groot LCPGM, Geleijnse JM, et al. Fish-oil supplementation induces antiinflammatory gene expression profiles in human blood mononuclear cells. *Am J Clin Nutr.* 2009 Aug;90(2):415–24.
22. Rudkowska I, Paradis A-M, Thifault E, Julien P, Tchernof A, Couture P, et al. Transcriptomic and metabolomic signatures of an n-3 polyunsaturated fatty acids supplementation in a normolipidemic/normocholesterolemic Caucasian population. *J Nutr Biochem.* 2013 Jan;24(1):54–61.
23. Merched AJ, Chan L. Nutrigenetics and Nutrigenomics of Atherosclerosis. *Curr Atheroscler Rep.* 2013 Jun;15(6):328.
24. Madden J, Williams CM, Calder PC, Lietz G, Miles EA, Cordell H, et al. The impact of common gene variants on the response of biomarkers of cardiovascular disease (CVD) risk to increased fish oil fatty acids intakes. *Annu Rev Nutr.* 2011 Aug 21;31:203–34.

25. Cave C, Hein N, Smith LM, Anderson-Berry A, Richter CK, Bisselou KS, et al. Omega-3 Long-Chain Polyunsaturated Fatty Acids Intake by Ethnicity, Income, and Education Level in the United States: NHANES 2003–2014. *Nutrients* [Internet]. 2020 Jul 9 [cited 2020 Oct 27];12(7). Available from: <https://www.ncbi.nlm.nih.gov/pmc/articles/PMC7400855/>
26. World Health Organization. Joint FAO/WHO Expert Consultation on Fats and Fatty Acids in Human Nutrition [Internet]. 2008. Available from: [http://www.who.int/nutrition/topics/FFA\\_interim\\_recommendations/en/](http://www.who.int/nutrition/topics/FFA_interim_recommendations/en/)
27. Fats and Fatty Acids in Human Nutrition | Karger Book [Internet]. [cited 2021 Jan 14]. Available from: <https://www.karger.com/Book/Home/251867>
28. Horne J, Madill J, O'Connor C, Shelley J, Gilliland J. A Systematic Review of Genetic Testing and Lifestyle Behaviour Change: Are We Using High-Quality Genetic Interventions and Considering Behaviour Change Theory? *Lifestyle Genomics*. 2018;11(1):49–63.
29. Corella D, Ordovás JM. Interactions between dietary *n*-3 fatty acids and genetic variants and risk of disease. *Br J Nutr*. 2012 Jun;107(S2):S271–83.
30. Grimaldi KA, van Ommen B, Ordovas JM, Parnell LD, Mathers JC, Bendik I, et al. Proposed guidelines to evaluate scientific validity and evidence for genotype-based dietary advice. *Genes Nutr*. 2017 Dec;12(1):35.
31. Khan KS, Kunz R, Kleijnen J, Antes G. Five steps to conducting a systematic review. *J R Soc Med*. 2003 Mar;96(3):118–21.
32. PRISMA. PRISMA: Transparent reporting of systematic reviews and meta-analyses [Internet]. 2015. Available from: <http://www.prisma-statement.org/>
33. Pollock A, Berge E. How to do a systematic review. *Int J Stroke*. 2018 Feb 1;13(2):138–56.
34. Dekkers OM, Vandenbroucke JP, Cevallos M, Renahan AG, Altman DG, Egger M. COSMOS-E: Guidance on conducting systematic reviews and meta-analyses of observational studies of etiology. *PLoS Med* [Internet]. 2019 Feb 21 [cited 2020 Apr 9];16(2). Available from: <https://www.ncbi.nlm.nih.gov/pmc/articles/PMC6383865/>
35. Corella D, Ordovás JM. Interactions between dietary *n*-3 fatty acids and genetic variants and risk of disease. *Br J Nutr*. 2012 Jun;107(0 2):S271–83.
36. GRADE handbook [Internet]. [cited 2020 Sep 29]. Available from: <https://gdt.gradepro.org/app/handbook/handbook.html>
37. SNIIPA - a single nucleotide polymorphisms annotator and browser [Internet]. [cited 2020 Aug 20]. Available from: [https://snipa.helmholtz-muenchen.de/snipa3/index.php?task=proxy\\_search](https://snipa.helmholtz-muenchen.de/snipa3/index.php?task=proxy_search)

- 1  
2  
3  
4  
5  
6  
7  
8  
9  
10  
11  
12  
13  
14  
15  
16  
17  
18  
19  
20  
21  
22  
23  
24  
25  
26  
27  
28  
29  
30  
31  
32  
33  
34  
35  
36  
37  
38  
39  
40  
41  
42  
43  
44  
45  
46  
47  
48  
49  
50  
51  
52  
53  
54  
55  
56  
57  
58  
59  
60
38. Hosseini-Esfahani F, Mirmiran P, Koochakpoor G, Daneshpour MS, Guity K, Azizi F. Some dietary factors can modulate the effect of the zinc transporters 8 polymorphism on the risk of metabolic syndrome. *Sci Rep*. 2017 Dec;7(1):1649.
  39. GRADE handbook [Internet]. [cited 2020 Apr 3]. Available from: <https://gdt.gradepro.org/app/handbook/handbook.html#h.dce0ghnajwsm>
  40. Murad MH, Mustafa RA, Schünemann HJ, Sultan S, Santesso N. Rating the certainty in evidence in the absence of a single estimate of effect. *Evid Based Med*. 2017 Jun;22(3):85–7.
  41. Ma L-L, Wang Y-Y, Yang Z-H, Huang D, Weng H, Zeng X-T. Methodological quality (risk of bias) assessment tools for primary and secondary medical studies: what are they and which is better? *Mil Med Res* [Internet]. 2020 Feb 29 [cited 2020 Sep 2];7. Available from: <https://www.ncbi.nlm.nih.gov/pmc/articles/PMC7049186/>
  42. Chen Y, Estampador AC, Keller M, Poveda A, Dalla-Riva J, Johansson I, et al. The combined effects of FADS gene variation and dietary fats in obesity-related traits in a population from the far north of Sweden: the GLACIER Study. *Int J Obes*. 2019 Apr;43(4):808–20.
  43. Ching YK, Chin YS, Appukutty M, Ramanchadran V, Yu CY, Ang GY, et al. Interaction of Dietary Linoleic Acid and  $\alpha$ -Linolenic Acids with rs174547 in FADS1 Gene on Metabolic Syndrome Components among Vegetarians. *Nutrients*. 2019 Jul 23;11(7):1686.
  44. Dumont J, Huybrechts I, Spinneker A, Gottrand F, Grammatikaki E, Bevilacqua N, et al. FADS1 genetic variability interacts with dietary  $\alpha$ -linolenic acid intake to affect serum non-HDL-cholesterol concentrations in European adolescents. *J Nutr*. 2011 Jul;141(7):1247–53.
  45. Dumont J, Goumidi L, Grenier-Boley B, Cottel D, Marécaux N, Montaye M, et al. Dietary linoleic acid interacts with FADS1 genetic variability to modulate HDL-cholesterol and obesity-related traits. *Clin Nutr*. 2018 Oct 1;37(5):1683–9.
  46. Hellstrand S, Sonestedt E, Ericson U, Gullberg B, Wirfält E, Hedblad B, et al. Intake levels of dietary long-chain PUFAs modify the association between genetic variation in FADS and LDL-C. *J Lipid Res*. 2012 Jun;53(6):1183–9.
  47. Lu Y, Feskens EJ, Dollé ME, Imholz S, Verschuren WM, Müller M, et al. Dietary n–3 and n–6 polyunsaturated fatty acid intake interacts with FADS1 genetic variation to affect total and HDL-cholesterol concentrations in the Doetinchem Cohort Study. *Am J Clin Nutr*. 2010 Jul 1;92(1):258–65.
  48. Standl M, Lattka E, Stach B, Koletzko S, Bauer C-P, von Berg A, et al. FADS1 FADS2 Gene Cluster, PUFA Intake and Blood Lipids in Children: Results from the GINIplus and LISAPLUS Studies. *PLoS ONE* [Internet]. 2012 May 21 [cited 2020 Aug 3];7(5). Available from: <https://www.ncbi.nlm.nih.gov/pmc/articles/PMC3357401/>
  49. Fontaine-Bisson B, Wolever TMS, Chiasson J-L, Rabasa-Lhoret R, Maheux P, Josse RG, et al. Genetic polymorphisms of tumor necrosis factor- $\alpha$  modify the association

between dietary polyunsaturated fatty acids and fasting HDL-cholesterol and apo A-I concentrations. *Am J Clin Nutr.* 2007 Sep;86(3):768–74.

50. Joffe YT, van der Merwe L, Carstens M, Collins M, Jennings C, Levitt NS, et al. Tumor Necrosis Factor- $\alpha$  Gene -308 G/A Polymorphism Modulates the Relationship between Dietary Fat Intake, Serum Lipids, and Obesity Risk in Black South African Women. *J Nutr.* 2010 May 1;140(5):901–7.
51. Joffe YT, van der Merwe L, Evans J, Collins M, Lambert EV, September A, et al. The tumor necrosis factor- $\alpha$  gene -238 G>A polymorphism, dietary fat intake, obesity risk and serum lipid concentrations in black and white South African women. *Eur J Clin Nutr.* 2012 Dec;66(12):1295–302.
52. Tai ES, Corella D, Demissie S, Cupples LA, Coltell O, Schaefer EJ, et al. Polyunsaturated Fatty Acids Interact with the PPARA-L162V Polymorphism to Affect Plasma Triglyceride and Apolipoprotein C-III Concentrations in the Framingham Heart Study. *J Nutr.* 2005 Mar 1;135(3):397–403.
53. Volcik KA, Nettleton JA, Ballantyne CM, Boerwinkle E. Peroxisome proliferator-activated receptor [alpha] genetic variation interacts with n-6 and long-chain n-3 fatty acid intake to affect total cholesterol and LDL-cholesterol concentrations in the Atherosclerosis Risk in Communities Study. *Am J Clin Nutr.* 2008 Jun;87(6):1926–31.
54. Bouchard-Mercier A, Godin G, Lamarché B, Pérusse L, Vohl M-C. Effects of Peroxisome Proliferator-Activated Receptors, Dietary Fat Intakes and Gene–Diet Interactions on Peak Particle Diameters of Low-Density Lipoproteins. *J Nutr Nutr.* 2011;4(1):36–48.
55. Fallaize R, Celis-Morales C, Macready AL, Marsaux CF, Forster H, O'Donovan C, et al. The effect of the apolipoprotein E genotype on response to personalized dietary advice intervention: findings from the Food4Me randomized controlled trial. *Am J Clin Nutr.* 2016 Sep;104(3):827–36.
56. Fontaine-Bisson B, Wolever TMS, Connelly PW, Corey PN, El-Sohemy A. NF- $\kappa$ B -94Ins/Del ATTG polymorphism modifies the association between dietary polyunsaturated fatty acids and HDL-cholesterol in two distinct populations. *Atherosclerosis.* 2009 Jun;204(2):465–70.
57. Jang HB, Hwang J-Y, Park JE, Oh JH, Ahn Y, Kang J-H, et al. Intake levels of dietary polyunsaturated fatty acids modify the association between the genetic variation in *PCSK5* and HDL cholesterol. *J Med Genet.* 2014 Dec;51(12):782–8.
58. Lai C-Q, Corella D, Demissie S, Cupples LA, Adiconis X, Zhu Y, et al. Dietary Intake of n-6 Fatty Acids Modulates Effect of Apolipoprotein A5 Gene on Plasma Fasting Triglycerides, Remnant Lipoprotein Concentrations, and Lipoprotein Particle Size: The Framingham Heart Study. *Circulation.* 2006 May 2;113(17):2062–70.
59. Richardson K, Louie-Gao Q, Arnett DK, Parnell LD, Lai C-Q, Davalos A, et al. The *PLIN4* Variant rs8887 Modulates Obesity Related Phenotypes in Humans through Creation of a Novel miR-522 Seed Site. Mailund T, editor. *PLoS ONE.* 2011 Apr 20;6(4):e17944.

- 1  
2  
3  
4  
5  
6  
7  
8  
9  
10  
11  
12  
13  
14  
15  
16  
17  
18  
19  
20  
21  
22  
23  
24  
25  
26  
27  
28  
29  
30  
31  
32  
33  
34  
35  
36  
37  
38  
39  
40  
41  
42  
43  
44  
45  
46  
47  
48  
49  
50  
51  
52  
53  
54  
55  
56  
57  
58  
59  
60
60. Warodomwichit D, Arnett DK, Kabagambe EK, Tsai MY, Hixson JE, Straka RJ, et al. Polyunsaturated Fatty Acids Modulate the Effect of TCF7L2 Gene Variants on Postprandial Lipemia. *J Nutr.* 2009 Mar 1;139(3):439–46.
  61. AlSaleh A, Maniou Z, Lewis FJ, Hall WL, Sanders TAB, O'Dell SD. Genetic predisposition scores for dyslipidaemia influence plasma lipid concentrations at baseline, but not the changes after controlled intake of n-3 polyunsaturated fatty acids. *Genes Nutr.* 2014 Jul;9(4):412.
  62. Harsløf LBS, Damsgaard CT, Hellgren LI, Andersen AD, Vogel U, Lauritzen L. Effects on metabolic markers are modified by PPARG2 and COX2 polymorphisms in infants randomized to fish oil. *Genes Nutr.* 2014 May;9(3):396.
  63. Rudkowska I, Guénard F, Julien P, Couture P, Lemieux S, Barbier O, et al. Genome-wide association study of the plasma triglyceride response to an n-3 polyunsaturated fatty acid supplementation. *J Lipid Res.* 2014 Jul;55(7):1245–53.
  64. Vallée Marcotte B, Guénard F, Cormier H, Lemieux S, Couture P, Rudkowska I, et al. Plasma Triglyceride Levels May Be Modulated by Gene Expression of IQCJ, NXP1, PHF17 and MYB in Humans. *Int J Mol Sci.* 2017 Jan 26;18(2).
  65. Vallée Marcotte B, Guénard F, Lemieux S, Couture P, Rudkowska I, Calder PC, et al. Fine mapping of genome-wide association study signals to identify genetic markers of the plasma triglyceride response to an omega-3 fatty acid supplementation. *Am J Clin Nutr.* 2019 Jan 1;109(1):176–85.
  66. Vallée Marcotte B, Allaire J, Guénard F, de Toro-Martín J, Couture P, Lamarche B, et al. Genetic risk prediction of the plasma triglyceride response to independent supplementations with eicosapentaenoic and docosahexaenoic acids: the COMPARED Study. *Genes Nutr.* 2020 Dec;15(1):10.
  67. Zheng J-S, Chen J, Wang L, Yang H, Fang L, Yu Y, et al. Replication of a Gene-Diet Interaction at CD36, NOS3 and PPARG in Response to Omega-3 Fatty Acid Supplements on Blood Lipids: A Double-Blind Randomized Controlled Trial. *EBioMedicine.* 2018 May;31:150–6.
  68. Vallée Marcotte B, Guénard F, Marquis J, Charpagne A, Vadillo-Ortega F, Tejero M, et al. Genetic Risk Score Predictive of the Plasma Triglyceride Response to an Omega-3 Fatty Acid Supplementation in a Mexican Population. *Nutrients.* 2019 Mar 29;11(4):737.
  69. Roke K, Mutch DM. The Role of FADS1/2 Polymorphisms on Cardiometabolic Markers and Fatty Acid Profiles in Young Adults Consuming Fish Oil Supplements. *Nutrients.* 2014 Jun 16;6(6):2290–304.
  70. Cormier H, Rudkowska I, Paradis A-M, Thifault E, Garneau V, Lemieux S, et al. Association between Polymorphisms in the Fatty Acid Desaturase Gene Cluster and the Plasma Triacylglycerol Response to an n-3 PUFA Supplementation. *Nutrients.* 2012 Aug 17;4(8):1026–41.

- 1  
2  
3  
4  
5  
6  
7  
8  
9  
10  
11  
12  
13  
14  
15  
16  
17  
18  
19  
20  
21  
22  
23  
24  
25  
26  
27  
28  
29  
30  
31  
32  
33  
34  
35  
36  
37  
38  
39  
40  
41  
42  
43  
44  
45  
46  
47  
48  
49  
50  
51  
52  
53  
54  
55  
56  
57  
58  
59
71. AbuMweis SS, Panchal SK, Jones PJH. Triacylglycerol-Lowering Effect of Docosahexaenoic Acid Is Not Influenced by Single-Nucleotide Polymorphisms Involved in Lipid Metabolism in Humans. *Lipids*. 2018;53(9):897–908.
  72. Carvalho-Wells AL, Jackson KG, Lockyer S, Lovegrove JA, Minihane AM. APOE genotype influences triglyceride and C-reactive protein responses to altered dietary fat intake in UK adults. *Am J Clin Nutr*. 2012 Dec 1;96(6):1447–53.
  73. Caslake MJ, Miles EA, Kofler BM, Lietz G, Curtis P, Armah CK, et al. Effect of sex and genotype on cardiovascular biomarker response to fish oils: the FINGEN Study. *Am J Clin Nutr*. 2008 Sep 1;88(3):618–29.
  74. Dang TM, Conway V, Plourde M. Disrupted fatty acid distribution in HDL and LDL according to apolipoprotein E allele. *Nutrition*. 2015 Jun 1;31(6):807–12.
  75. Jackson KG, Lockyer S, Carvalho-Wells AL, Williams CM, Minihane AM, Lovegrove JA. Dietary fat manipulation has a greater impact on postprandial lipid metabolism than the apolipoprotein E (epsilon) genotype—insights from the SATgene study. *Mol Nutr Food Res*. 2012;56(12):1761–70.
  76. Jackson KG, Lockyer S, Carvalho-Wells AL, Williams CM, Minihane AM, Lovegrove JA. *Apolipoprotein E (epsilon) genotype has a greater impact on apoB-48 than apoB-100 responses to dietary fat manipulation—insights from the SATgene study*. *Mol Nutr Food Res*. 2017 Apr;61(4):1600688.
  77. Minihane AM, Khan S, Leigh-Firbank EC, Talmud P, Wright JW, Murphy MC, et al. ApoE Polymorphism and Fish Oil Supplementation in Subjects With an Atherogenic Lipoprotein Phenotype. *Arterioscler Thromb Vasc Biol*. 2000 Aug;20(8):1990–7.
  78. Olano-Martin E, Anil E, Caslake MJ, Packard CJ, Bedford D, Stewart G, et al. Contribution of apolipoprotein E genotype and docosahexaenoic acid to the LDL-cholesterol response to fish oil. *Atherosclerosis*. 2010 Mar;209(1):104–10.
  79. Paschos GK, Yiannakouris N, Rallidis LS, Davies I, Griffin BA, Panagiotakos DB, et al. Apolipoprotein E Genotype in Dyslipidemic Patients and Response of Blood Lipids and Inflammatory Markers to Alpha-Linolenic Acid. *Angiology*. 2005 Jan 1;56(1):49–60.
  80. Thifault E, Cormier H, Bouchard-Mercier A, Rudkowska I, Paradis A-M, Garneau V, et al. Effects of Age, Sex, Body Mass Index and APOE Genotype on Cardiovascular Biomarker Response to an n-3 Polyunsaturated Fatty Acid Supplementation. *J Nutr Nutr*. 2013;6(2):73–82.
  81. Madden J, Carrero J, Brunner A, Dastur N, Shearman C, Calder P, et al. Polymorphisms in the CD36 gene modulate the ability of fish oil supplements to lower fasting plasma triacyl glycerol and raise HDL cholesterol concentrations in healthy middle-aged men. *Prostaglandins, Leukotrienes and Essential Fatty Acids*. 2008;78:327–35.
  82. Dawczynski C, Massey KA, Ness C, Kiehntopf M, Stepanow S, Platzer M, et al. Randomized placebo-controlled intervention with n-3 LC-PUFA-supplemented yoghurt: Effects on circulating eicosanoids and cardiovascular risk factors. *Clin Nutr*. 2013 Oct 1;32(5):686–96.

- 1  
2  
3  
4  
5  
6  
7  
8  
9  
10  
11  
12  
13  
14  
15  
16  
17  
18  
19  
20  
21  
22  
23  
24  
25  
26  
27  
28  
29  
30  
31  
32  
33  
34  
35  
36  
37  
38  
39  
40  
41  
42  
43  
44  
45  
46  
47  
48  
49  
50  
51  
52  
53  
54  
55  
56  
57  
58  
59  
60
83. Binia A, Vargas-Martínez C, Ancira-Moreno M, Gosoniu LM, Montoliu I, Gámez-Valdez E, et al. Improvement of cardiometabolic markers after fish oil intervention in young Mexican adults and the role of PPAR $\alpha$  L162V and PPAR $\gamma$ 2 P12A. *J Nutr Biochem*. 2017 May;43:98–106.
  84. Itariu BK, Zeyda M, Hochbrugger EE, Neuhofer A, Prager G, Schindler K, et al. Long-chain n–3 PUFAs reduce adipose tissue and systemic inflammation in severely obese nondiabetic patients: a randomized controlled trial. *Am J Clin Nutr*. 2012 Nov 1;96(5):1137–49.
  85. Lindi V, Schwab U, Louheranta A, Laakso M, Vessby B, Hermansen K, et al. Impact of the Pro12Ala polymorphism of the PPAR- $\gamma$ 2 gene on serum triacylglycerol response to n–3 fatty acid supplementation. *Mol Genet Metab*. 2003 May;79(1):52–60.
  86. Pishva H, Mehdipour P, Eshraghian MR, Mahboob S-A. Effects of Eicosapentaenoic Acid Supplementation on Lipid and Lipoprotein Profile in Hypertriglyceridemic Subjects with Different Proliferator-activated Receptor Alpha Genotypes. :13.
  87. Caron-Dorval D, Paquet P, Paradis A-M, Rudkowska I, Lemieux S, Couture P, et al. Effect of the PPAR-Alpha L162V Polymorphism on the Cardiovascular Disease Risk Factor in Response to n–3 Polyunsaturated Fatty Acids. *J Nutr Nutr*. 2008;1(4):205–12.
  88. Binia A, Vargas-Martínez C, Ancira-Moreno M, Gosoniu LM, Montoliu I, Gámez-Valdez E, et al. Improvement of cardiometabolic markers after fish oil intervention in young Mexican adults and the role of PPAR $\alpha$  L162V and PPAR $\gamma$ 2 P12A. *J Nutr Biochem*. 2017 May;43:98–106.
  89. Dawczynski C, Massey KA, Ness C, Kiehntopf M, Stepanow S, Platzer M, et al. Randomized placebo-controlled intervention with n-3 LC-PUFA-supplemented yoghurt: Effects on circulating eicosanoids and cardiovascular risk factors. *Clin Nutr*. 2013 Oct;32(5):686–96.
  90. Kotze M, Brand T, Pretorius J, J van Rensburg S, Luckhoff HK. Apolipoprotein E epsilon-4 as a genetic determinant of Alzheimer's disease heterogeneity. *Degener Neurol Neuromuscul Dis*. 2015 Jan;9.
  91. Marais AD. Apolipoprotein E in lipoprotein metabolism, health and cardiovascular disease. *Pathology (Phila)*. 2019 Feb;51(2):165–76.
  92. Kuo C-L, Pilling LC, Atkins JL, Kuchel GA, Melzer D. ApoE e2 and aging-related outcomes in 379,000 UK Biobank participants. *Aging*. 2020 Jun 8;12(12):12222–33.
  93. Nawawi HM, Chua Y-A, Watts GF. The brave new world of genetic testing in the management of the dyslipidaemias. *Curr Opin Cardiol*. 2020;35(3):226–33.
  94. Livingston G, Huntley J, Sommerlad A, Ames D, Ballard C, Banerjee S, et al. Dementia prevention, intervention, and care: 2020 report of the Lancet Commission. *The Lancet*. 2020 Aug;396(10248):413–46.
  95. Dorszewska J, Prendecki M, Oczkowska A, Dezor M, Kozubski W. Molecular Basis of Familial and Sporadic Alzheimer's Disease. *Curr Alzheimer Res*. 2016;13(9):952–63.



- 1  
2  
3  
4  
5  
6  
7  
8  
9  
10  
11  
12  
13  
14  
15  
16  
17  
18  
19  
20  
21  
22  
23  
24  
25  
26  
27  
28  
29  
30  
31  
32  
33  
34  
35  
36  
37  
38  
39  
40  
41  
42  
43  
44  
45  
46  
47  
48  
49  
50  
51  
52  
53  
54  
55  
56  
57  
58  
59  
60
96. ACCE Model Process for Evaluating Genetic Tests | CDC [Internet]. 2021 [cited 2021 Feb 15]. Available from: <https://www.cdc.gov/genomics/gtesting/acce/index.htm>
  97. Corella D, Coltell O, Portolés O, Sotos-Prieto M, Fernández-Carrión R, Ramirez-Sabio J, et al. A Guide to Applying the Sex-Gender Perspective to Nutritional Genomics. *Nutrients*. 2018 Dec 20;11(1):4.
  98. Dellinger RW, Gomez Garcia AM, Meyskens FL. Differences in the Glucuronidation of Resveratrol and Pterostilbene: Altered Enzyme Specificity and Potential Gender Differences. *Drug Metab Pharmacokinet*. 2014;29(2):112–9.
  99. Vidaver RM, Lafleur B, Tong C, Bradshaw R, Marts SA. Women Subjects in NIH-Funded Clinical Research Literature: Lack of Progress in Both Representation and Analysis by Sex. *J Womens Health Gend Based Med*. 2000 Jun 1;9(5):495–504.
  100. Carvalho-Wells AL, Jackson KG, Lockyer S, Lovegrove JA, Minihane AM. APOE genotype influences triglyceride and C-reactive protein responses to altered dietary fat intake in UK adults. *Am J Clin Nutr*. 2012 Dec 1;96(6):1447–53.
  101. Thifault E, Cormier H, Bouchard-Mercier A, Rudkowska I, Paradis A-M, Garneau V, et al. Effects of Age, Sex, Body Mass Index and APOE Genotype on Cardiovascular Biomarker Response to an n-3 Polyunsaturated Fatty Acid Supplementation. *Lifestyle Genomics*. 2013;6(2):73–82.
  102. Minihane Anne M., Khan Syrah, Leigh-Firbank Elizabeth C., Talmud Philippa, Wright John W., Murphy Margaret C., et al. ApoE Polymorphism and Fish Oil Supplementation in Subjects With an Atherogenic Lipoprotein Phenotype. *Arterioscler Thromb Vasc Biol*. 2000 Aug 1;20(8):1990–7.
  103. Little J, Higgins J, Ioannidis J, Moher D, Gagnon F, von Elm E, et al., editors. STrengthening the REporting of Genetic Association studies (STREGA) - An extension of the STROBE statement. *PLoS Med*. 2009;6(2):e1000022.
  104. Strande NT. Evaluating the Clinical Validity of Gene-Disease Associations: An Evidence-Based Framework Developed by the Clinical Genome Resource. *The American Journal of Human Genetics*. 2017;12.
  105. Ciesielski TH, Pendergrass SA, White MJ, Kodaman N, Sobota RS, Huang M, et al. Diverse convergent evidence in the genetic analysis of complex disease: coordinating omic, informatic, and experimental evidence to better identify and validate risk factors. *BioData Min*. 2014 Dec;7(1):10.
  106. Rudkowska I, Paradis A-M, Thifault E, Julien P, Barbier O, Couture P, et al. Differences in metabolomic and transcriptomic profiles between responders and non-responders to an n-3 polyunsaturated fatty acids (PUFAs) supplementation. *Genes Nutr*. 2013 Jul;8(4):411–23.
  107. Tremblay BL, Cormier H, Rudkowska I, Lemieux S, Couture P, Vohl M-C. Association between polymorphisms in phospholipase A2 genes and the plasma triglyceride response to an n-3 PUFA supplementation: a clinical trial. *Lipids Health Dis*. 2015 Feb 21;14(1):12.

- 1  
2  
3 108. Ouellette C, Cormier H, Rudkowska I, Guénard F, Lemieux S, Couture P, et al.  
4 Polymorphisms in Genes Involved in the Triglyceride Synthesis Pathway and Marine  
5 Omega-3 Polyunsaturated Fatty Acid Supplementation Modulate Plasma Triglyceride  
6 Levels. *Lifestyle Genomics*. 2013;6(4-5):268-80.  
7
- 8 109. Ray-Barruel G, Rickard CM. Helping nurses help PIVCs: decision aids for daily  
9 assessment and maintenance. *Br J Nurs Mark Allen Publ*. 2018 Apr 26;27(8):S12-8.  
10  
11  
12  
13  
14  
15  
16  
17  
18  
19  
20  
21  
22  
23  
24  
25  
26  
27  
28  
29  
30  
31  
32  
33  
34  
35  
36  
37  
38  
39  
40  
41  
42  
43  
44  
45  
46  
47  
48  
49  
50  
51  
52  
53  
54  
55  
56  
57  
58  
59  
60

1  
2  
3  
4  
5  
6  
7  
8  
9  
10  
11  
12  
13  
14  
15  
16  
17  
18  
19  
20  
21  
22  
23  
24  
25  
26  
27  
28  
29  
30  
31  
32  
33  
34  
35  
36  
37  
38  
39  
40  
41  
42  
43  
44  
45  
46  
47

For peer review only

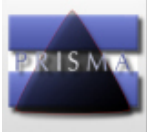

**Figure 1: PRISMA 2009 Flow Diagram**



1  
2  
3  
4  
5  
6  
7  
8  
9  
10  
11  
12  
13  
14  
15  
16  
17  
18  
19  
20  
21  
22  
23  
24  
25  
26  
27  
28  
29  
30  
31  
32  
33  
34  
35  
36  
37  
38  
39  
40  
41  
42  
43  
44  
45  
46  
47  
48  
49  
50  
51  
52  
53  
54  
55  
56  
57  
58  
59  
60

For peer review only

## Supplementary Tables

### *Supplementary Table 1: Search Strategy*

| <b>Embase</b> |                                                                                                                                                                                                                                                                                                                                                                                                                                                                                   |
|---------------|-----------------------------------------------------------------------------------------------------------------------------------------------------------------------------------------------------------------------------------------------------------------------------------------------------------------------------------------------------------------------------------------------------------------------------------------------------------------------------------|
| <b>#</b>      | <b>Search Strategy</b>                                                                                                                                                                                                                                                                                                                                                                                                                                                            |
| 1             | omega-3':ti,ab,kw OR pufa\$:ti,ab,kw OR ((acid* NEAR/5 ('n-3' OR polyunsaturated OR linolenic OR eicosapenta\$noic OR timnodonic OR docosahexa\$noic)):ti,ab,kw) OR docosahexaenoate:ti,ab,kw OR epa:ti,ab,kw OR dha:ti,ab,kw OR ala:ti,ab,kw                                                                                                                                                                                                                                     |
| 2             | omega 3 fatty acid'/exp                                                                                                                                                                                                                                                                                                                                                                                                                                                           |
| <b>3</b>      | <b>#1 OR #2</b>                                                                                                                                                                                                                                                                                                                                                                                                                                                                   |
| 4             | cholesterol*:ti,ab,kw OR hdl:ti,ab,kw OR ldl:ti,ab,kw OR 'high density lipoprotein*':ti,ab,kw OR 'low density lipoprotein*':ti,ab,kw OR 'beta lipoprotein*':ti,ab,kw OR apo*protein*:ti,ab,kw OR apoa:ti,ab,kw OR apob:ti,ab,kw OR apoc:ti,ab,kw OR apod:ti,ab,kw OR apoe:ti,ab,kw OR apoh:ti,ab,kw OR ((apo NEXT/1 (a OR b OR c OR d OR e OR h)):ti,ab,kw) OR triglyceride*:ti,ab,kw OR triacylglycerol*:ti,ab,kw OR (((serum OR plasma) NEXT/1 (lipid* OR tg OR tag)):ti,ab,kw) |
| 5             | cholesterol'/exp OR 'lipoprotein'/exp OR 'triacylglycerol'/exp                                                                                                                                                                                                                                                                                                                                                                                                                    |
| <b>6</b>      | <b>#4 OR #5</b>                                                                                                                                                                                                                                                                                                                                                                                                                                                                   |
| 7             | nutrigenomic*:ti,ab,kw OR nutrigenetic*:ti,ab,kw OR (((nutritional OR expression* OR variation* OR variant*) NEAR/2 (genomic* OR genetic* OR gene OR genes)):ti,ab,kw) OR genotype:ti,ab,kw OR (((('nutrient-gene' OR 'gene-nutrient' OR 'gene-diet') NEXT/1 interaction*)):ti,ab,kw) OR 'personalized nutrition':ti,ab,kw OR 'precision nutrition':ti,ab,kw                                                                                                                      |
| 8             | nutrigenomics'/exp OR 'nutrigenetics'/exp OR 'genetic variation'/exp OR 'genotype'/exp                                                                                                                                                                                                                                                                                                                                                                                            |
| <b>9</b>      | <b>#7 OR #8</b>                                                                                                                                                                                                                                                                                                                                                                                                                                                                   |
| <b>10</b>     | <b>#3 AND #6 AND #9</b>                                                                                                                                                                                                                                                                                                                                                                                                                                                           |
| 11            | [animals]/lim NOT [humans]/lim                                                                                                                                                                                                                                                                                                                                                                                                                                                    |
| <b>12</b>     | <b>#10 NOT #11</b>                                                                                                                                                                                                                                                                                                                                                                                                                                                                |

## Medline (Ovid)

| #  | Search Strategy                                                                                                                                                                                                                                                                                                            |
|----|----------------------------------------------------------------------------------------------------------------------------------------------------------------------------------------------------------------------------------------------------------------------------------------------------------------------------|
| 1  | ("omega-3" or PUFA? or (acid* adj5 ("n-3" or polyunsaturated or linolenic or eicosapenta?noic or timnodonic or docosahexa?noic)) or docosahexaenoate or EPA or DHA or ALA).ab,kf,ti.                                                                                                                                       |
| 2  | exp Fatty Acids, Omega-3/                                                                                                                                                                                                                                                                                                  |
| 3  | <b>1 or 2</b>                                                                                                                                                                                                                                                                                                              |
| 4  | (cholesterol* or HDL or LDL or "high density lipoprotein*" or "low density lipoprotein*" or "beta lipoprotein*" or apo*protein* or apoA or apoB or apoC or apoD or apoE or apoH or (apo adj (A or B or C or D or E or H)) or triglyceride* or triacylglycerol* or ((serum or plasma) adj (lipid* or TG or TAG))).ab,kf,ti. |
| 5  | exp Cholesterol/ or exp Lipoproteins/ or exp Triglycerides/                                                                                                                                                                                                                                                                |
| 6  | <b>4 or 5</b>                                                                                                                                                                                                                                                                                                              |
| 7  | (nutrigenomic* or nutrigenetic* or ((nutritional or expression* or variation* or variant*) adj2 (genomic* or genetic* or gene or genes)) or genotype or (("nutrient-gene" or "gene-nutrient" or "gene-diet") adj interaction*) or "personalized nutrition" or "precision nutrition").ab,kf,ti.                             |
| 8  | Nutrigenomics/ or Genetic Variation/ or Genotype/                                                                                                                                                                                                                                                                          |
| 9  | <b>7 or 8</b>                                                                                                                                                                                                                                                                                                              |
| 10 | <b>3 and 6 and 9</b>                                                                                                                                                                                                                                                                                                       |
| 11 | exp animals/ not humans.sh.                                                                                                                                                                                                                                                                                                |
| 12 | <b>10 not 11</b>                                                                                                                                                                                                                                                                                                           |

## Web of Science

*Indexes = SCI-EXPANDED, SSCI, A&HCI, CPCI-S, CPCI-SSH, ESCI Timespan =All years*

1  
2  
3  
4  
5  
6  
7  
8  
9  
10  
11  
12  
13  
14  
15  
16  
17  
18  
19  
20  
21  
22  
23  
24  
25  
26  
27  
28  
29  
30  
31  
32  
33  
34  
35  
36  
37  
38  
39  
40  
41  
42  
43  
44  
45  
46  
47

| # | Search Strategy                                                                                                                                                                                                                                                                                                                                                                                                                                                                                                                                                                                                                                                                                                                                                                                                                                                                                                                                                                                                                                                                                                                                                                                                                                                                                                                                                                                                                                                                                                                                                                                                                                                                                                                                                                                                                                                                                                                                                                                                                                                                                                                                                                                                                                                                                                                                                                                                                                                                                                                                                                                                                                                                                                                                                                                                                                                                                                                                                       |
|---|-----------------------------------------------------------------------------------------------------------------------------------------------------------------------------------------------------------------------------------------------------------------------------------------------------------------------------------------------------------------------------------------------------------------------------------------------------------------------------------------------------------------------------------------------------------------------------------------------------------------------------------------------------------------------------------------------------------------------------------------------------------------------------------------------------------------------------------------------------------------------------------------------------------------------------------------------------------------------------------------------------------------------------------------------------------------------------------------------------------------------------------------------------------------------------------------------------------------------------------------------------------------------------------------------------------------------------------------------------------------------------------------------------------------------------------------------------------------------------------------------------------------------------------------------------------------------------------------------------------------------------------------------------------------------------------------------------------------------------------------------------------------------------------------------------------------------------------------------------------------------------------------------------------------------------------------------------------------------------------------------------------------------------------------------------------------------------------------------------------------------------------------------------------------------------------------------------------------------------------------------------------------------------------------------------------------------------------------------------------------------------------------------------------------------------------------------------------------------------------------------------------------------------------------------------------------------------------------------------------------------------------------------------------------------------------------------------------------------------------------------------------------------------------------------------------------------------------------------------------------------------------------------------------------------------------------------------------------------|
| 1 | TS=("omega-3" or PUFA\$ or (acid* NEAR/5 ("n-3" or polyunsaturated or linolenic or eicosapenta\$noic or timnodonic or docosahexa\$noic)) or docosahexaenoate or EPA or DHA or ALA)                                                                                                                                                                                                                                                                                                                                                                                                                                                                                                                                                                                                                                                                                                                                                                                                                                                                                                                                                                                                                                                                                                                                                                                                                                                                                                                                                                                                                                                                                                                                                                                                                                                                                                                                                                                                                                                                                                                                                                                                                                                                                                                                                                                                                                                                                                                                                                                                                                                                                                                                                                                                                                                                                                                                                                                    |
| 2 | TS=(cholesterol* or HDL or LDL or "high density lipoprotein*" or "low density lipoprotein*" or "beta lipoprotein*" or apo*protein* or apoA or apoB or apoC or apoD or apoE or apoH or (apo NEAR/0 (A or B or C or D or E or H)) or triglyceride* or triacylglycerol* or ((serum or plasma) NEAR/0 (lipid* or TG or TAG)))                                                                                                                                                                                                                                                                                                                                                                                                                                                                                                                                                                                                                                                                                                                                                                                                                                                                                                                                                                                                                                                                                                                                                                                                                                                                                                                                                                                                                                                                                                                                                                                                                                                                                                                                                                                                                                                                                                                                                                                                                                                                                                                                                                                                                                                                                                                                                                                                                                                                                                                                                                                                                                             |
| 3 | TS=(nutrigenomic* or nutrigenetic* or ((nutritional or expression* or variation* or variant*) NEAR/2 (genomic* or genetic* or gene or genes)) or genotype or (("nutrient-gene" or "gene-nutrient" or "gene-diet") NEAR/0 interaction*) or "personalized nutrition" or "precision nutrition" )                                                                                                                                                                                                                                                                                                                                                                                                                                                                                                                                                                                                                                                                                                                                                                                                                                                                                                                                                                                                                                                                                                                                                                                                                                                                                                                                                                                                                                                                                                                                                                                                                                                                                                                                                                                                                                                                                                                                                                                                                                                                                                                                                                                                                                                                                                                                                                                                                                                                                                                                                                                                                                                                         |
| 4 | <b>#1 AND #2 AND #3</b>                                                                                                                                                                                                                                                                                                                                                                                                                                                                                                                                                                                                                                                                                                                                                                                                                                                                                                                                                                                                                                                                                                                                                                                                                                                                                                                                                                                                                                                                                                                                                                                                                                                                                                                                                                                                                                                                                                                                                                                                                                                                                                                                                                                                                                                                                                                                                                                                                                                                                                                                                                                                                                                                                                                                                                                                                                                                                                                                               |
| 5 | TS=(animals OR animal OR mice OR mus OR mouse OR murine OR woodmouse OR rats OR rat OR murinae OR muridae OR cottonrat OR cottonrats OR hamster OR hamsters OR cricetinae OR rodentia OR rodent OR rodents OR pigs OR pig OR swine OR swines OR piglets OR piglet OR boar OR boars OR "sus scrofa" OR ferrets OR ferret OR polecat OR polecats OR "mustela putorius" OR "guinea pigs" OR "guinea pig" OR cavia OR callithrix OR marmoset OR marmosets OR cebuella OR hapale OR octodon OR chinchilla OR chinchillas OR gerbillinae OR gerbil OR gerbils OR jird OR jirds OR merione OR meriones OR rabbits OR rabbit OR hares OR hare OR diptera OR flies OR fly OR dipteral OR drosophila OR drosophilidae OR cats OR cat OR carus OR felis OR nematoda OR nematode OR nematoda OR nematode OR nematodes OR sipunculida OR dogs OR dog OR canine OR canines OR canis OR sheep OR sheeps OR mouflon OR mouflons OR ovis OR goats OR goat OR capra OR capras OR rupicapra OR chamois OR haplorhini OR monkey OR monkeys OR anthropoidea OR anthropoids OR saguinus OR tamarin OR tamarins OR leontopithecus OR hominidae OR ape OR apes OR pan OR paniscus OR "pan paniscus" OR bonobo OR bonobos OR troglodytes OR "pan troglodytes" OR gibbon OR gibbons OR siamang OR siamangs OR nomascus OR symphalangus OR chimpanzee OR chimpanzees OR prosimians OR "bush baby" OR prosimian OR bush babies OR galagos OR galago OR pongidae OR gorilla OR gorillas OR pongo OR pygmaeus OR "pongo pygmaeus" OR orangutans OR pygmaeus OR lemur OR lemurs OR lemuridae OR horse OR horses OR pongo OR equus OR cow OR calf OR bull OR chicken OR chickens OR gallus OR quail OR bird OR birds OR quails OR poultry OR poultries OR fowl OR fowls OR reptile OR reptilia OR reptiles OR snakes OR snake OR lizard OR lizards OR alligator OR alligators OR crocodile OR crocodiles OR turtle OR turtles OR amphibian OR amphibians OR amphibia OR frog OR frogs OR bombina OR salientia OR toad OR toads OR "epidalea calamita" OR salamander OR salamanders OR eel OR eels OR sciuridae OR squirrel OR squirrels OR chipmunk OR chipmunks OR suslik OR susliks OR vole OR voles OR lemming OR lemmings OR muskrat OR muskrats OR lemmus OR otter OR otters OR marten OR martens OR martes OR weasel OR badger OR badgers OR ermine OR mink OR minks OR sable OR sables OR gulo OR gulos OR wolverine OR wolverines OR minks OR mustela OR llama OR llamas OR alpaca OR alpacas OR camelid OR camelids OR guanaco OR guanacos OR chiroptera OR chiropteras OR bat OR bats OR fox OR foxes OR iguana OR iguanas OR xenopus laevis OR parakeet OR parakeets OR parrot OR parrots OR donkey OR donkeys OR mule OR mules OR zebra OR zebras OR shrew OR shrews OR bison OR bisons OR buffalo OR buffaloes OR deer OR deers OR bear OR bears OR panda OR pandas OR "wild hog" OR "wild boar" OR fitchew OR fitch OR beaver OR beavers OR jerboa OR jerboas OR capybara OR capybaras) |
| 6 | <b>#4 not #5</b>                                                                                                                                                                                                                                                                                                                                                                                                                                                                                                                                                                                                                                                                                                                                                                                                                                                                                                                                                                                                                                                                                                                                                                                                                                                                                                                                                                                                                                                                                                                                                                                                                                                                                                                                                                                                                                                                                                                                                                                                                                                                                                                                                                                                                                                                                                                                                                                                                                                                                                                                                                                                                                                                                                                                                                                                                                                                                                                                                      |



Supplementary Table 2: Summary of observational studies

| Author, Year                     | Study Design                                         | Genetic Approach                       | Population (sample size included in analyses)                                        | Gene(s), SNP(s)                                                                                                                          | Cytogenic Location of Gene(s)                                              | Quantity, Source and Type of Omega-3 <sup>1</sup>                                                                  | Comparators                                                                                                                                                                                   | Plasma Lipid/Lipoprotein Outcome(s) | Summary of Statistically Significant Study Findings Relevant to the Research Question <sup>2</sup>                                                                                                                                                                                                                                                                                                                                                                                                                           |
|----------------------------------|------------------------------------------------------|----------------------------------------|--------------------------------------------------------------------------------------|------------------------------------------------------------------------------------------------------------------------------------------|----------------------------------------------------------------------------|--------------------------------------------------------------------------------------------------------------------|-----------------------------------------------------------------------------------------------------------------------------------------------------------------------------------------------|-------------------------------------|------------------------------------------------------------------------------------------------------------------------------------------------------------------------------------------------------------------------------------------------------------------------------------------------------------------------------------------------------------------------------------------------------------------------------------------------------------------------------------------------------------------------------|
| Bouchard-Mercier et al. 2011 (1) | Cross-Sectional                                      | Single SNP                             | Healthy Caucasian men and women from INFOGENE study (n=674)                          | <i>PPARα</i> , L162V (rs1800206)<br><i>PPARγ</i> , P12A (rs1801282)<br><i>PPARδ</i> , -87T→C (rs2016520)                                 | <i>PPARα</i> : 22q13.31<br><i>PPARγ</i> : 3p25.2<br><i>PPARδ</i> : 6p21.31 | Mean:<br>L162: 2.8 g/day<br>V162: 2.9 g/day<br>(unclear if food and/or supplement sources)                         | Minor allele carriers vs. Non-carriers                                                                                                                                                        | LDL-PPD                             | <b>LDL-PPD:</b> In a model including age, sex, TG, BMI, energy and omega-3 intakes and <i>PPARα</i> L162V (rs1800206) polymorphism, the interaction of <i>PPARα</i> 162V and omega-3 intakes explained 0.62% of the variance in LDL-PPD.                                                                                                                                                                                                                                                                                     |
| Bodhini et al. 2017 (2)          | Cross-Sectional                                      | Single SNP                             | Adults with normal glucose tolerance (n=821) and adults with type 2 diabetes (n=861) | <i>MC4R</i> , rs17782313<br><i>TCF7L2</i> , rs12255372<br><i>TCF7L2</i> , rs7903146                                                      | <i>MC4R</i> : 18q21.32<br><i>TCF7L2</i> : 10q25.2-q25.3                    | <b>Low:</b> 0.38 g/day ALA<br><b>Moderate:</b> 0.58 g/day ALA<br><b>High:</b> 0.89 g/day ALA (means) (food)        | Major allele homozygotes vs. Minor allele carriers                                                                                                                                            | HDL-c                               | <b>HDL-c:</b> 'T' allele carriers of <i>TCF7L2</i> rs12255372 within the lowest tertile of ALA intake (mean=0.38 g/day) exhibited higher levels of HDL-c compared to GG homozygotes in the lowest tertile of ALA intake (mean=0.38 g/day)                                                                                                                                                                                                                                                                                    |
| Chen et al. 2019 (3)             | Cross-Sectional Analysis within a Prospective Cohort | Single SNP, Haplotype and Gene-Centric | Adults of Swedish ancestry from the GLACIER cohort (n=5160)                          | All variations in the <i>FADS1-FADS2-FADS3</i> gene cluster and variation within 200kb upstream and downstream of the <i>FADS</i> region | <i>FADS1</i> : 11q12.2<br><i>FADS2</i> : 11q12.2<br><i>FADS3</i> : 11q12.2 | <b>High:</b> >1.6 g/day<br><b>Low:</b> <1.6 g/day (food)                                                           | Entire <i>FADS</i> region gene-centric analysis and Variation in individual <i>FADS</i> cluster SNPs: rs174570, rs174602, rs74771917, rs3168072, rs12577276, rs7115739 and Haplotype analysis | HDL-c<br>LDL-c<br>TG<br>Total-c     | <b>HDL-c:</b> Significant interaction of rs174570 and omega-3 on HDL-c<br><b>LDL-c:</b> Significant interaction of rs174602 and omega-3 on LDL-c<br><b>TG:</b> Gene-centric analyses demonstrated a significant interaction between variation in the <i>FADS</i> gene cluster and omega-3 intake on TG<br><b>Total-c:</b> Significant interaction of rs174602 and omega-3 on total-c ('C' allele carriers exhibited lower total-c with low omega-3 intake, while no such relationship was observed with high omega-3 intake) |
| Ching et al. 2019 (4)            | Cross-Sectional                                      | Single SNP                             | Vegetarian adults of Malaysian ancestry (n=200)                                      | <i>FADS1</i> , rs174547                                                                                                                  | <i>FADS1</i> : 11q12.2                                                     | <b>Low:</b> ≤0.45 g/day ALA<br><b>Moderate:</b> 0.46-0.64 g/day ALA<br><b>High:</b> >0.64 g/day ALA (means) (food) | Comparison between three genotypes                                                                                                                                                            | HDL-c<br>TG                         | <b>HDL-c:</b> The TT genotype had significantly lower HDL-c when ALA intake was in the moderate intake range, but there were no significant gene-omega-3 interaction on lipid levels                                                                                                                                                                                                                                                                                                                                         |
| Dumont et al. 2011 (5)           | Cross-Sectional                                      | Single SNP                             | Adolescents of European ancestry (n=573)                                             | <i>FADS1</i> , rs174547                                                                                                                  | <i>FADS1</i> : 11q12.2                                                     | <b>High:</b> >1.4 g/day ALA<br><b>Low:</b> ≤1.4 g/day ALA<br>(unclear if food and/or supplement sources)           | Major allele homozygotes vs. Minor allele carriers                                                                                                                                            | HDL-c<br>LDL-c<br>TG<br>Total-c     | <b>Total-c:</b> Significant interaction whereby the minor allele (CT+TT genotype) was associated with lower total-c when ALA intake is high as compared to when intake is low. This remained significant after assessing the interaction using ALA intake as a continuous variable.                                                                                                                                                                                                                                          |

|                                                          |                                        |                                                                                       |               |                                                                                                 |                                                             |                                         |                                                                                                                                                                                                                                                  |                                                                                                                            |                                 |                                                                                                                                                                                                                                                                                                                                                                                                                                                                                                                                                                                                               |
|----------------------------------------------------------|----------------------------------------|---------------------------------------------------------------------------------------|---------------|-------------------------------------------------------------------------------------------------|-------------------------------------------------------------|-----------------------------------------|--------------------------------------------------------------------------------------------------------------------------------------------------------------------------------------------------------------------------------------------------|----------------------------------------------------------------------------------------------------------------------------|---------------------------------|---------------------------------------------------------------------------------------------------------------------------------------------------------------------------------------------------------------------------------------------------------------------------------------------------------------------------------------------------------------------------------------------------------------------------------------------------------------------------------------------------------------------------------------------------------------------------------------------------------------|
| 1<br>2<br>3<br>4<br>5<br>6<br>7<br>8<br>9                | Dumont et al. 2018 (6)                 | Cross-Sectional                                                                       | Single SNP    | Men and women aged 35 to 74 years from the MONA LISA Study of three French populations (n=3069) | <i>FADS1</i> , rs174547                                     | <i>FADS1</i> : 11q12.2                  | <b>Low:</b> 0.6 g/day ALA (mean)<br><b>Median:</b> 0.8 g/day ALA (stratified by median for analyses)<br><b>High:</b> 1.3 g/day ALA (mean) (food and supplement)                                                                                  | Comparison between three genotypes                                                                                         | HDL-c<br>LDL-c<br>TG<br>Total-c | --                                                                                                                                                                                                                                                                                                                                                                                                                                                                                                                                                                                                            |
| 10<br>11<br>12<br>13<br>14<br>15<br>16<br>17<br>18       | Fallaize et al. 2016 (7)               | Cross-Sectional (Baseline) and Longitudinal Analyses within a Randomized Intervention | Single SNP*   | Healthy adults enrolled in the Food4Me European trial (n=1466)                                  | <i>APOE</i> , rs429358, rs7412                              | <i>APOE</i> : 19q13.32                  | <b>High:</b> >0.67 %kcal<br><b>Low:</b> <0.67 %kcal<br><b>Increased Intake:</b> reduced omega-3 intake from baseline<br><b>Decreased Intake:</b> decreased omega-3 intake from baseline (unclear if food and/or supplement sources)              | <i>APOE</i> -E4 vs. <i>APOE</i> -E4+                                                                                       | Total-c                         | <b>Total-c:</b> Cross-sectional (baseline) analysis demonstrated a significant genotype effect for <i>APOE</i> , omega-3 intake, and total-c. Longitudinal analysis (baseline to month 6) demonstrated a significant genotype effect for <i>APOE</i> , change in omega-3 intake (increase or decrease) and total-c.                                                                                                                                                                                                                                                                                           |
| 19<br>20<br>21<br>22<br>23<br>24                         | Fontaine-Bisson and El-Sohemy 2007 (8) | Cross-Sectional                                                                       | Genetic Score | Men and women aged 20-29 years (n=595)                                                          | <i>TNF<math>\alpha</math></i> , rs361525, rs1800629         | <i>TNF<math>\alpha</math></i> : 6p21.33 | Intake range: 0.2-4.6 %kcal (mean intakes were 0.7 %kcal for 0/0, 0.7% kcal for 0/1 and 0.6%kcal for 1/0) (food)                                                                                                                                 | No minor allele ('A') for both SNPs (0/0) vs. One minor allele for rs361525 (1/0) vs. One minor allele for rs1800625 (0/1) | HDL-c                           | --                                                                                                                                                                                                                                                                                                                                                                                                                                                                                                                                                                                                            |
| 25<br>26<br>27<br>28                                     | Fontaine-Bisson et al. 2009 (9)        | Cross-Sectional                                                                       | Single SNP    | Healthy men and women aged 20-29 years (n=593)                                                  | <i>NF-<math>\kappa</math>B</i> -94Ins/Del ATTG (rs28362491) | <i>NF-<math>\kappa</math>B</i> : 4q24   | Mean intake: 0.7 %kcal (unclear if food and/or supplement sources)                                                                                                                                                                               | Ins/Ins vs. Ins/Del vs. Del/Del                                                                                            | HDL-c                           | <b>HDL-c:</b> Significant interaction between <i>NF-<math>\kappa</math>B</i> genotype and omega-3 intake on HDL-c                                                                                                                                                                                                                                                                                                                                                                                                                                                                                             |
| 29<br>30<br>31<br>32<br>33<br>34<br>35<br>36<br>37<br>38 | Hellstrand et al. 2012 (10)            | Cross-Sectional                                                                       | Single SNP    | Healthy men and women aged 45-68 years from Sweden (n=4635)                                     | <i>FADS</i> , rs174547                                      | <i>FADS</i> : 11q12.2                   | <b>Low:</b> $\leq$ 0.14 %kcal long-chain omega-3<br><b>Moderate:</b> 0.14-0.28 %kcal long-chain omega-3<br><b>High:</b> >0.28 %kcal long-chain omega-3 (tertiles of intake reported only for certain significant findings) (food and supplement) | TT vs. TC vs. CC                                                                                                           | HDL-c<br>LDL-c<br>TG            | <b>LDL-c:</b> Significant interaction between <i>FADS</i> rs174547 genotype and long-chain omega-3 on LDL-c whereby the 'C' allele was significantly associated with lower LDL-c when long-chain omega-3 intake was in the lowest tertile (but not in the moderate or highest tertile). High long-chain omega-3 intake was associated with significantly higher LDL-c for CC and TC genotypes but not TT genotypes. Stratified analysis based on sex demonstrated that these significant interactions remained for men, but not women, however there was not a significant difference in interactions by sex. |
| 39<br>40<br>41<br>42<br>43<br>44<br>45<br>46<br>47       | Hosseini-Esfahani et al. 2017 (11)     | Nested Case-Control                                                                   | Single SNP    | Healthy men and women aged $\geq$ 18 years from Iran                                            | <i>ZNT8</i> , rs13266634                                    | <i>ZNT8</i> : 8q24.11                   | <b>Tertiles for omega-3:</b><br><b>Low:</b> <0.38 %kcal<br><b>Moderate:</b> 0.38-                                                                                                                                                                | CC vs. CT+TT                                                                                                               | HDL-c<br>TG                     | <b>HDL-c:</b> Significant interaction between <i>ZNT8</i> rs13266634 genotype and omega-3 intake on the risk of low HDL-c whereby CC genotypes exhibited a decreased risk of low HDL-c with increasing intake of omega-3; this was not observed in                                                                                                                                                                                                                                                                                                                                                            |

|                        |                 |            |                                                                                                                     |                                                                                            |                        |                                                                                                                                                                                                                                                                                     |                                                                                          |                                                  |                                                                                                                                                                                                                                                                                                                                                                                                                                                                                                                                                                                                                                                                                                                                                                                                                                                                                                         |
|------------------------|-----------------|------------|---------------------------------------------------------------------------------------------------------------------|--------------------------------------------------------------------------------------------|------------------------|-------------------------------------------------------------------------------------------------------------------------------------------------------------------------------------------------------------------------------------------------------------------------------------|------------------------------------------------------------------------------------------|--------------------------------------------------|---------------------------------------------------------------------------------------------------------------------------------------------------------------------------------------------------------------------------------------------------------------------------------------------------------------------------------------------------------------------------------------------------------------------------------------------------------------------------------------------------------------------------------------------------------------------------------------------------------------------------------------------------------------------------------------------------------------------------------------------------------------------------------------------------------------------------------------------------------------------------------------------------------|
|                        |                 |            | (n=1634)                                                                                                            |                                                                                            |                        | 0.54 %kcal<br><b>High:</b> >0.54 %kcal (food)                                                                                                                                                                                                                                       |                                                                                          |                                                  | the CT+TT genotype group.<br><b>TG:</b> Significant interaction between <i>ZNF78</i> rs13266634 genotype and omega-3 intake on the risk of high TG whereby CC genotypes exhibited a decreased risk of high TG with increasing intake of omega-3; this was not exhibited in the CT+TT genotype group.                                                                                                                                                                                                                                                                                                                                                                                                                                                                                                                                                                                                    |
| Jang et al. 2014 (12)  | Cross-Sectional | Single SNP | Adult: Men and women aged 40-69 from Korea (n=4205)<br>Children: Boys and girls aged 8-13 years from Korea (n=1548) | <i>PCSK5</i> , rs1029035                                                                   | <i>PCSK5</i> : 9q21.13 | Based on overall median intake (further detailed elsewhere (12)):<br><b>Low:</b> <0.4 %kcal (food)<br><b>High:</b> >0.4 %kcal (food)                                                                                                                                                | CC vs. CA vs. AA                                                                         | HDL-c                                            | <b>HDL-c:</b> Significant interaction between <i>PCSK5</i> rs1029035 and omega-3 on HDL-c in male children and male adults. 'C' allele carriers exhibit a tendency to decrease HDL-c with omega-3, while AA genotypes exhibit the opposite effect.                                                                                                                                                                                                                                                                                                                                                                                                                                                                                                                                                                                                                                                      |
| Joffe et al. 2010 (13) | Cross-Sectional | Single SNP | Black women from South Africa, normal weight or with obesity (n=138)                                                | <i>TNFA</i> , rs1800629                                                                    | <i>TNFA</i> : 6p21.33  | ALA (amount not reported/cannot determine) (food)                                                                                                                                                                                                                                   | GG vs. GA+AA                                                                             | HDL-c<br>LDL-c<br>TG<br>Total-c<br>Total-c:HDL-c | <b>Total-c:HDL-c ratio:</b> Significant interaction between <i>TNFA</i> , rs1800629 genotypes and %kcal from ALA whereby increasing %kcal from ALA was associated with increases in Total-c:HDL-c for GG genotypes but decreases in Total-c:HDL-c ratio for GA+AA genotypes                                                                                                                                                                                                                                                                                                                                                                                                                                                                                                                                                                                                                             |
| Joffe et al. 2012 (14) | Cross-Sectional | Single SNP | Black and white women from South Africa, normal weight or with obesity (n=263)                                      | <i>TNFA</i> , rs361525                                                                     | <i>TNFA</i> : 6p21.33  | <b>Median Intakes:</b><br>omega-3: 0.28-0.36 % kcal<br>ALA: 0.21-0.26 %kcal<br>EPA: 0.02 %kcal<br>DHA: 0.04-0.08 %kcal (food)                                                                                                                                                       | GG vs. GA(+AA for one participant: black, normal weight)                                 | HDL-c<br>LDL-c<br>TG<br>Total-c<br>Total-c:HDL-c | <b>LDL-c:</b> Significant interaction for Caucasian women whereby LDL-c decreased with increasing %kcal from EPA in the GG genotype but not the GA genotype of <i>TNFA</i> , rs361525.<br><b>Total-c:</b> Significant interaction for white women whereby total-c decreased with increasing EPA and DHA intakes in the GG genotype group but not the GA genotype group of <i>TNFA</i> rs361525 but individual rates were not significant.<br><b>Total-c:HDL-c ratio:</b> Significant interaction for black women whereby Total-c:HDL-c decreased within increasing %kcal from omega-3 in the GA genotype group but not GG of <i>TNFA</i> rs361525.                                                                                                                                                                                                                                                      |
| Joffe et al. 2014 (15) | Cross-Sectional | Single SNP | Black and white women from South Africa, normal weight or with obesity (n=268)                                      | <i>IL-6</i> , -174 G>C, IVS3 (rs1800795), +281 G>T, IVS4 (rs1554606), +869 A>G (rs2069845) | <i>IL-6</i> : 7p15.3   | Black Women (%kcal/day): 0.28 omega-3, 0.21 ALA, 0.02 EPA, 0.04 DHA (normal weight); 0.36 omega-3, 0.22 ALA, 0.04 EPA, 0.08 DHA (obesity)<br>White Women (%kcal/day): 0.33 omega-3, 0.26 ALA, 0.01 EPA, 0.05 DHA (normal weight); 0.32 omega-3, 0.25 ALA, 0.02 EPA, 0.05 DHA (food) | Major allele homozygotes vs. Minor allele carriers or Comparison between three genotypes | HDL-c<br>LDL-c<br>TG<br>Total-c<br>Total-c:HDL-c | The following results were statistically significant only in white women, but not in black women:<br><b>HDL-c:</b> Significant interaction whereby HDL-c increased with increasing omega-3 and/or DHA and/or ALA intake in <i>IL-6</i> rs1800795 C allele carriers and increasing ALA intake in <i>IL-6</i> rs1554606 T allele carriers. HDL-c decreased with increasing EPA and/or DHA intake in <i>IL-6</i> rs2069845 G allele carriers.<br><b>TG:</b> Significant interaction whereby TG reduced with increasing EPA intake in <i>IL-6</i> rs1800795 C allele carriers<br><b>Total-c:HDL-c:</b> Significant interaction whereby total-c:HDL-c ratio decreased with increasing EPA intake in <i>IL-6</i> rs1800795 CC genotypes and <i>IL-6</i> rs1554606 TT genotypes, increasing DHA intake in <i>IL-6</i> rs1800795 CC genotypes, and increasing ALA intake in <i>IL-6</i> rs1554606 TT genotypes. |
| Lai et al. 2006 (16)   | Cross-Sectional | Single SNP | Men and women from the Framingham                                                                                   | <i>APOA5</i> , rs662799, rs651821, rs3135506,                                              | <i>APOA5</i> : 11q23.3 | <b>Mean Intake:</b> 0.69 %kcal omega-3<br><b>Tertiles for</b>                                                                                                                                                                                                                       | Major allele homozygotes vs. Minor allele carriers                                       | TG                                               | --                                                                                                                                                                                                                                                                                                                                                                                                                                                                                                                                                                                                                                                                                                                                                                                                                                                                                                      |

|                             |                                                                                                                         |            |                                                                                  |                                                                                        |                          |                                                                                                                                                                              |                                                        |                                 |                                                                                                                                                                                                                                                                                                                                                        |
|-----------------------------|-------------------------------------------------------------------------------------------------------------------------|------------|----------------------------------------------------------------------------------|----------------------------------------------------------------------------------------|--------------------------|------------------------------------------------------------------------------------------------------------------------------------------------------------------------------|--------------------------------------------------------|---------------------------------|--------------------------------------------------------------------------------------------------------------------------------------------------------------------------------------------------------------------------------------------------------------------------------------------------------------------------------------------------------|
|                             |                                                                                                                         |            | Heart Study (n=2148)                                                             | rs2072560, rs2266788                                                                   |                          | <b>omega-3:</b><br><b>Low:</b> <0.58 %kcal<br><b>Moderate:</b> 0.58-0.74 %kcal<br><b>High:</b> >0.74 %kcal<br>(unclear if food and/or supplement sources)                    |                                                        |                                 |                                                                                                                                                                                                                                                                                                                                                        |
| Lu et al. 2010 (17)         | Cross-Sectional                                                                                                         | Single SNP | Men and women of Doetinchem Cohort Study (n=3575)                                | <i>FADS</i> , rs174546, rs482548, rs174570                                             | <i>FADS</i> : 11q12.2    | Mean intake: 0.5 %kcal (food)                                                                                                                                                | Comparison between three genotypes                     | HDL-c<br>Total-c                | <b>Total -c:</b> In high omega-3 intake group, total-c was significantly higher with each added minor 'C' allele of rs174546                                                                                                                                                                                                                           |
| Nettleton et al. 2009 (18)  | Cross-Sectional                                                                                                         | Single SNP | Men and women of Caucasian ancestry (n=8511)                                     | <i>ANGPTL4</i> E40K (rs116843064)                                                      | <i>ANGPTL4</i> : 19p13.2 | Not Reported/Cannot Determine (food)                                                                                                                                         | Minor allele carriers vs. Non-allele carriers          | HDL-c<br>TG                     | --                                                                                                                                                                                                                                                                                                                                                     |
| Richardson et al. 2011 (19) | Meta-analysis of the Framingham Offspring Study (FOS) and the Genetics of Lipid Lowering Drugs and Diet Network (GOLDN) | Single SNP | Men and women from FOS and GOLDN studies (n=3605)                                | <i>PLIN4</i> , rs8887, rs11673616, rs892158, rs7250947, rs8102428, rs1609717, rs884164 | <i>PLIN4</i> : 19p13.3   | Mean intakes:<br><b>FOS Men:</b> 1.43 g/d<br><b>FOS Women:</b> 1.37 g/d<br><b>GOLDN Men:</b> 1.83 g/d<br><b>GOLDN Women:</b> 1.48 g/d (food and supplement)                  | Minor allele carriers vs. Non-allele carriers          | TG<br>HDL-c                     | <b>TG:</b> Significant interactions for <i>PLIN4</i> , rs884164 whereby TG levels increased in minor allele carriers with higher omega-3 intake for males and females combined, and males individually.                                                                                                                                                |
| Standl et al. 2012 (20)     | Cross-Sectional Analysis (10-year time point) within a 10-year longitudinal cohort study                                | Single SNP | 10 year-old children of the GINIplus and LISApplus birth cohort studies (n=1697) | <i>FADS1/FADS2</i> , rs174545, rs174546, rs174556, rs174561, rs174575, rs3834458       | <i>FADS1/2</i> : 11q12.2 | Median intake: 0.14 mg/MJ omega-3 (ALA+EPA+DPA+DHA) (food and supplement)                                                                                                    | Comparison between three genotypes                     | HDL-c<br>LDL-c<br>Total-c<br>TG | --                                                                                                                                                                                                                                                                                                                                                     |
| Tai et al. 2005 (21)        | Cross-Sectional                                                                                                         | Single SNP | Framingham Cohort, men and women (n=2106)                                        | <i>PPARα</i> , L162V (rs1800206)                                                       | <i>PPARα</i> : 22q13.31  | <b>High:</b> >0.69 %kcal<br><b>Low:</b> <0.69 %kcal (food)                                                                                                                   | <i>PPARα</i> : 162V carriers vs. 162L/162L homozygotes | TG<br>apoC-III                  | <b>TG:</b> 167V carriers had lower TG with high omega-3 intake compared to low omega-3 intake (gene-diet-interaction effects were NS)<br><b>apoC-III:</b> Significant gene-diet interactions; Higher apoC-III in 162V carriers with low omega-3 intake compared to 162V carriers with high omega-3 intake and 162L homozygotes with low omega-3 intake |
| Volcik et al. 2008 (22)     | Cross-Sectional (Baseline) Analysis within a Prospective Cohort                                                         | Single SNP | African American (n=3480) and Caucasian (n=10 134) men and women (N=13,614)      | <i>PPARα</i> , L162V (rs1800206), 3'UTR G>A (rs6008259), 3'UTR C>T (rs3892755)         | <i>PPARα</i> : 22q13.31  | African American:<br><b>High:</b> >0.32 g/d EPA+DHA<br><b>Low:</b> ≤0.32 g/d EPA+DHA<br>Caucasian:<br><b>High:</b> >0.22 g/d EPA+DHA<br><b>Low:</b> ≤0.22 g/d EPA+DHA (food) | Comparison between three genotypes for each SNP        | HDL-c<br>LDL-c<br>TG<br>Total-c | <b>Total-c, LDL-c:</b> African Americans (but not Caucasians) homozygous for <i>PPARα</i> (rs3892755) TT genotype with high EPA+DHA intake had significantly lower total-c and LDL-c compared to CT and TT genotypes (both high and low EPA+DHA intake)                                                                                                |

|                                 |                              |                                                        |            |                                       |                                     |                              |                                            |                                                    |                                                        |    |
|---------------------------------|------------------------------|--------------------------------------------------------|------------|---------------------------------------|-------------------------------------|------------------------------|--------------------------------------------|----------------------------------------------------|--------------------------------------------------------|----|
| 1<br>2<br>3<br>4<br>5<br>6<br>7 | Warodomwich et al. 2009 (23) | Cross-sectional with fasting and postprandial measures | Single SNP | Men and women of GOLDN study (n=1083) | <i>TCF7L2</i> rs7903146, rs12255372 | <i>TCF7L2</i> : 10q25.2-25.3 | N/A (Median omega-3: 0.67% of kcal) (food) | Major allele homozygotes vs. Minor allele carriers | HDL-c<br>LDL-c<br>LDL-c particle size<br>TG<br>Total-c | -- |
|---------------------------------|------------------------------|--------------------------------------------------------|------------|---------------------------------------|-------------------------------------|------------------------------|--------------------------------------------|----------------------------------------------------|--------------------------------------------------------|----|

8 ALA: alpha-linolenic acid, Apo: apolipoprotein, DHA: docosahexaenoic acid, EPA: eicosapentaenoic acid, HDL: high-density lipoprotein cholesterol, LDL: low-density lipoprotein cholesterol, N/A: not applicable, NS: Non-significant, sdLDL-c: small, dense, low-density lipoprotein cholesterol, SNP: single nucleotide polymorphism, TG: triglycerides

9 1. Intakes are total omega-3 unless otherwise specified

10 2. All other (not listed) gene/omega-3/lipid/lipoprotein results of interest to the present review were NS

11 Participants are described as “healthy” for studies that incorporated exclusion criteria for certain conditions, blood lipid levels, etc. and when studies described the population as “healthy.”

12 3. These results were taken from the full-text manuscript’s summary table of IL-6 results. Refer to Supplementary Tables S8-S13 in Joffe et al. 2014 (15) for several other significant results, stratified and un-stratified by ethnicity. Note: There were no corrections for multiple testing in the statistical analyses.

13 ‘-’ indicates that all of the completed gene/omega-3/lipid/lipoprotein analyses were NS

14 \*Human *APOE* is polymorphic at two single nucleotides (rs429358 and rs7412) resulting in three different alleles (ε2, ε3 and ε4)

Supplementary Table 3: Summary of interventional studies

| Author, Year              | Study Design                                  | Genetic Approach         | Population (sample size included in analyses)               | Intervention Duration | Gene(s), SNP(s)                                                                                                                                                                                                                                                                                                                                                             | Cytogenic Location of Gene(s)                                                                                                                                                                                                                                                                                                               | Quantity, Source and Type of Omega-3                                                                                                          | Comparators                                                                                                                                                                                                                                 | Plasma Lipid/Lipoprotein Outcome(s)              | Summary of Statistically Significant Study Findings Relevant to the Research Question <sup>1</sup>                                                                                          |
|---------------------------|-----------------------------------------------|--------------------------|-------------------------------------------------------------|-----------------------|-----------------------------------------------------------------------------------------------------------------------------------------------------------------------------------------------------------------------------------------------------------------------------------------------------------------------------------------------------------------------------|---------------------------------------------------------------------------------------------------------------------------------------------------------------------------------------------------------------------------------------------------------------------------------------------------------------------------------------------|-----------------------------------------------------------------------------------------------------------------------------------------------|---------------------------------------------------------------------------------------------------------------------------------------------------------------------------------------------------------------------------------------------|--------------------------------------------------|---------------------------------------------------------------------------------------------------------------------------------------------------------------------------------------------|
| AbuMweis et al. 2018 (24) | Randomized, Crossover Controlled Intervention | Single SNP*              | Adults with at least one cardiovascular risk factor (n=129) | 4 weeks               | <i>FADS1</i> , rs174561<br><i>FADS2</i> , rs174583<br><i>ELOVL2</i> , rs953413<br><i>ELOVL5</i> , rs2397142<br><i>CETP</i> , rs5882<br><i>SCD1</i> , rs2234970,<br><i>PPARA</i> , rs6008259<br><i>LIPF</i> , rs814628<br><br>and<br><i>APOE</i> , rs429358, rs7412                                                                                                          | <i>FADS1/2</i> : 11q12.2<br><i>ELOVL2</i> : 6p24.2<br><i>ELOVL5</i> : 6p12.1<br><i>CETP</i> : 16q13<br><i>SCD1</i> : 10q24.31<br><i>PPARA</i> : 22q13.31<br><i>LIPF</i> : 10q23.31<br><i>APOE</i> : 19q13.32                                                                                                                                | Intake range: 1.0 – 2.5 g/day DHA (supplement)                                                                                                | Comparison between three genotypes for each single SNP (except <i>PPARA</i> and <i>LIPF</i> whereby analyses were major allele homozygotes vs. minor allele carriers)<br><br>and<br><i>APOE</i> -E2 vs. <i>APOE</i> -E3 vs. <i>APOE</i> -E4 | apoA1<br>apoB<br>HDL-c<br>LDL-c<br>TG<br>Total-c | --                                                                                                                                                                                          |
| Alsaleh et al. 2014 (25)  | Randomized Controlled Intervention            | Single SNP and Polygenic | Healthy men and women (n=310)                               | 12 months             | <i>CETP</i> , rs3764261,<br><i>LIPC</i> , rs1532085<br><i>APOB</i> , rs1367117<br><i>ABCG5/ABCG</i> , rs4299376<br><i>TIMD4/HAVCR1</i> , rs6882076<br><i>GCKR</i> , rs1260326<br><i>TRIB1</i> , rs2954029<br><i>ANGPTL3/DOCK7</i> , rs2131925<br><i>FADS1/2/3</i> , rs174546<br><i>GALNT2</i> , rs4846914<br><i>ABCA1</i> , rs4149268<br><i>APOE/APOC1/APOC2</i> , rs439401 | <i>CETP</i> : 16q13<br><i>LIPC</i> : 15q21.3<br><i>APOB</i> : 2p24.1<br><i>ABCG5/ABCG8</i> : 2p.21<br><i>TIMD4/HAVCR1</i> : 5q33.3<br><i>GCKR</i> : 2p23.3<br><i>TRIB1</i> : 8q24.13<br><i>ANGPTL3/DOCK7</i> : 7: 1p31.3<br><i>FADS</i> : 11q12.2<br><i>GALNT2</i> : 1q42.13<br><i>ABCA1</i> : 9q31.1<br><i>APOE/APOC1/APOC2</i> : 19q13.32 | <b>Low Dose:</b> 0.5 g/day EPA and DHA<br><b>Moderate Dose:</b> 0.9 g/day EPA and DHA<br><b>High Dose:</b> 1.8 g/day EPA and DHA (supplement) | Effect sizes per GRS risk allele after omega-3 treatment and Risk allele carriers vs. non-risk allele carriers                                                                                                                              | HDL-c<br>LDL-c<br>TG<br>Total-c                  | <b>TG:</b> significant interaction whereby 1.8 g/day EPA and DHA significantly reduced TG in T allele carriers (21.6% reduction) vs. CC genotypes (3.5% reduction) of <i>FADS1</i> rs174546 |

1  
2  
3  
4  
5  
6  
7  
8  
9  
10  
11  
12  
13  
14  
15  
16  
17  
18  
19  
20  
21  
22  
23  
24  
25  
26  
27  
28  
29  
30  
31  
32  
33  
34  
35  
36  
37  
38  
39  
40  
41  
42  
43  
44  
45  
46  
47

|                                   |                                                          |                                    |                                                |         |                                                                                                                                                                                                          |                                                                                                                                                                                |                                                                                                                    |                                                                                                                                           |                                                                                                                     |                                                                                                                                                                                                                                                                                                                                                                                                                                                                                                                           |
|-----------------------------------|----------------------------------------------------------|------------------------------------|------------------------------------------------|---------|----------------------------------------------------------------------------------------------------------------------------------------------------------------------------------------------------------|--------------------------------------------------------------------------------------------------------------------------------------------------------------------------------|--------------------------------------------------------------------------------------------------------------------|-------------------------------------------------------------------------------------------------------------------------------------------|---------------------------------------------------------------------------------------------------------------------|---------------------------------------------------------------------------------------------------------------------------------------------------------------------------------------------------------------------------------------------------------------------------------------------------------------------------------------------------------------------------------------------------------------------------------------------------------------------------------------------------------------------------|
| Armstrong et al. 2012 (26)        | Double-Blind, Placebo-Controlled Randomized Intervention | Single SNP (deletion polymorphism) | Healthy adults of African ancestry (n=98)      | 6 weeks | <i>ALOX5</i> , dd (33, 34 or 44), d5 (35, 45) and 55 (control) genotypes                                                                                                                                 | <i>ALOX5</i> : 10q11.21                                                                                                                                                        | Fish oil: 5.0 g/day containing 2.0 g/day EPA and 1.0 g/day DHA<br>Control oil: 5.0 g/day corn/soy oil (supplement) | dd vs. d5 vs. 55                                                                                                                          | TG<br>Mean lipoprotein particle diameter, total number of particles and particle concentration for: HDL-c and LDL-c | <b>TG</b> : significant interaction whereby decreases in TG from omega-3 supplementation were specific to d5 genotype group<br><b>HDL-c particle concentration</b> : significant decrease with omega-3 intervention in the d5 and 55 genotype groups compared to placebo, but no decreases in the dd genotype group<br><b>Medium HDL-c particles and HDL-c (mmol/L)</b> : significant gene-treatment interaction but no significant differences after post-hoc analysis for comparisons among genotypes                   |
| Binia et al. 2017 (27)            | Single-Arm Clinical Trial                                | Single SNP                         | Mexican adults 18-40 years (n=191)             | 6 weeks | <i>PPARA</i> , L162V (rs1800206), <i>PPARγ2</i> , P12A (rs1801282)                                                                                                                                       | <i>PPARA</i> : 22q13.31<br><i>PPARγ2</i> : 3p25.2                                                                                                                              | Fish oil: 2.7 g/day containing 1.9 g/d EPA and 0.8 g/day DHA (supplement)                                          | Major allele homozygotes vs. Minor allele carriers                                                                                        | HDL-c<br>LDL-c<br>TG<br>Total-c                                                                                     | <b>LDL-c</b> : significant increase in LDL-c among minor allele carriers ( <i>PPARγ2</i> Pro12Ala and Ala12Ala) only vs. <i>PPARγ2</i> Pro12Pro genotypes only for individuals with BMI>25.0 kg/m <sup>2</sup><br><b>Total-c</b> : significant increase in total-c among minor allele carriers ( <i>PPARγ2</i> Pro12Ala and Ala12Ala) only vs. <i>PPARγ2</i> Pro12Pro genotypes only for individuals with BMI>25.0 kg/m <sup>2</sup>                                                                                      |
| Bouchard Mercier et al. 2013 (28) | Single Arm Clinical Trial                                | Single SNP                         | Healthy adults aged 18-50 years (n=208)        | 6 weeks | <i>SREBF1</i> , rs4925115, rs4925118, rs12953299<br><i>ACLY</i> , rs8071753, rs8065502, rs2304497<br><i>ACACA</i> rs2017571, rs29221368, rs9906044, rs2229416, rs1714987, rs1266175, rs3815059, rs829165 | <i>SREBF1</i> : 17p11.2<br><i>ACLY</i> : 17q21.2<br><i>ACACA</i> : 17q12                                                                                                       | Fish oil: 5.0 g/day containing 1.9-2.2 g/day EPA and 1.1 g/day DHA (supplement)                                    | Major allele homozygotes vs. Minor allele carriers<br>or<br>Comparison between three genotypes (when minor allele frequencies were >0.05) | TG                                                                                                                  | <b>TG</b> : Significant gene-diet interaction whereby individuals with the GG genotype of <i>ACLY</i> rs8071753 and individuals with the GG or CG genotype of <i>ACACA</i> rs1714987 exhibited greater TG lower effects following omega-3 supplementation; these two SNPs explained approximately 8% of the variance in plasma TG responses to omega-3 supplementation. There were significant differences in genotype frequencies of <i>ACLY</i> rs8071753 for responders and non-responders to omega-3 for TG lowering. |
| Bouchard-Mercier et al. 2014 (29) | Single Arm Clinical Trial                                | Single SNP                         | Healthy men and women aged 18-50 years (n=208) | 6 weeks | <i>RXRα</i> (12 SNPs), <i>CPT1A</i> (9 SNPs), <i>ACADVL</i> (1 SNP), <i>ACAA2</i> (6 SNPs), <i>ABCD2</i> (8 SNPs), <i>ACOX1</i> (8 SNPs), <i>ACAA1</i> (3 SNPs) [outlined in Supplementary Table 5]      | <i>RXRα</i> : 9q34.2<br><i>CPT1A</i> : 11q13.3<br><i>ACADVL</i> : 17p13.1<br><i>ACAA2</i> : 18q21.1<br><i>ABCD2</i> : 12q12<br><i>ACOX1</i> : 17q25.1<br><i>ACAA1</i> : 3p22.2 | Fish oil: 5.0 g/day containing 1.9-2.2 g/day EPA and 1.1 g/day DHA (supplement)                                    | Major allele homozygotes vs. Minor allele carriers<br>or<br>Comparison between three genotypes (when minor allele frequencies were >0.05) | TG                                                                                                                  | <b>TG</b> : There were significant gene-diet interaction effects on TG responses to omega-3 for <i>RXRα</i> rs11185660 genotype dependent on total fat intake, <i>RXRα</i> rs10881576, rs12339187 and rs11185660 genotypes dependent on saturated fat intake, and <i>ACOX1</i> rs17583163 dependent on total polyunsaturated fat intake                                                                                                                                                                                   |
| Bouchard-Mercier et al. 2014 (30) | Single Arm Clinical Trial                                | Single SNP                         | Healthy men and women aged 18-50 years (n=208) | 6 weeks | <i>GCK</i> (13 SNPs) [outlined in Supplementary Table 5]                                                                                                                                                 | <i>GCK</i> : 7p13                                                                                                                                                              | Fish oil: 5.0 g/day containing 1.9-2.2 g/day EPA and 1.1 g/day DHA (supplement)                                    | Major allele homozygotes vs. Minor allele carriers<br>or<br>Comparison between three genotypes                                            | TG                                                                                                                  | <b>TG</b> : CC genotypes of <i>GCK</i> rs741038 exhibited significantly greater TG reduction in response to omega-3 when their carbohydrate intake was high (>48.6%kcal) compared to those with the CC genotype of rs741038 with low carbohydrate intake (≤48.6%kcal) and compared to CT or TT genotypes with either high or low carbohydrate intake.                                                                                                                                                                     |

|    |                                 |                                                                      |             |                                                              |                  |                                                                        |                         |                                                                                                                                                                                                                                                                                                            |                                                                                  |                                                                        |                                                                                                                                                                                                                                                                                                     |
|----|---------------------------------|----------------------------------------------------------------------|-------------|--------------------------------------------------------------|------------------|------------------------------------------------------------------------|-------------------------|------------------------------------------------------------------------------------------------------------------------------------------------------------------------------------------------------------------------------------------------------------------------------------------------------------|----------------------------------------------------------------------------------|------------------------------------------------------------------------|-----------------------------------------------------------------------------------------------------------------------------------------------------------------------------------------------------------------------------------------------------------------------------------------------------|
| 3  |                                 |                                                                      |             |                                                              |                  |                                                                        |                         | (when minor allele frequencies were >0.05)                                                                                                                                                                                                                                                                 |                                                                                  |                                                                        |                                                                                                                                                                                                                                                                                                     |
| 4  |                                 |                                                                      |             |                                                              |                  |                                                                        |                         |                                                                                                                                                                                                                                                                                                            |                                                                                  |                                                                        |                                                                                                                                                                                                                                                                                                     |
| 5  |                                 |                                                                      |             |                                                              |                  |                                                                        |                         |                                                                                                                                                                                                                                                                                                            |                                                                                  |                                                                        |                                                                                                                                                                                                                                                                                                     |
| 6  | Caron-Dorval et al. 2008 (31)   | Single Arm Clinical Trial                                            | Single SNP  | Healthy men of Caucasian ancestry aged 18-55 years (n=28)    | 6 weeks          | <i>PPARA</i> , L162V (rs1800206)                                       | <i>PPARA</i> : 22q13.31 | Fish oil: 5.0 g/day containing 1.9 g/day EPA and 1.1 g/day DHA (supplement)                                                                                                                                                                                                                                | V162 carriers vs. non-carriers                                                   | apoB-100<br>HDL-c<br>LDL-c<br>TG<br>Total-c<br>Total-C:HDL-c           | --                                                                                                                                                                                                                                                                                                  |
| 7  |                                 |                                                                      |             |                                                              |                  |                                                                        |                         |                                                                                                                                                                                                                                                                                                            |                                                                                  |                                                                        |                                                                                                                                                                                                                                                                                                     |
| 8  |                                 |                                                                      |             |                                                              |                  |                                                                        |                         |                                                                                                                                                                                                                                                                                                            |                                                                                  |                                                                        |                                                                                                                                                                                                                                                                                                     |
| 9  |                                 |                                                                      |             |                                                              |                  |                                                                        |                         |                                                                                                                                                                                                                                                                                                            |                                                                                  |                                                                        |                                                                                                                                                                                                                                                                                                     |
| 10 |                                 |                                                                      |             |                                                              |                  |                                                                        |                         |                                                                                                                                                                                                                                                                                                            |                                                                                  |                                                                        |                                                                                                                                                                                                                                                                                                     |
| 11 |                                 |                                                                      |             |                                                              |                  |                                                                        |                         |                                                                                                                                                                                                                                                                                                            |                                                                                  |                                                                        |                                                                                                                                                                                                                                                                                                     |
| 12 |                                 |                                                                      |             |                                                              |                  |                                                                        |                         |                                                                                                                                                                                                                                                                                                            |                                                                                  |                                                                        |                                                                                                                                                                                                                                                                                                     |
| 13 |                                 |                                                                      |             |                                                              |                  |                                                                        |                         |                                                                                                                                                                                                                                                                                                            |                                                                                  |                                                                        |                                                                                                                                                                                                                                                                                                     |
| 14 | Carvalho-Wells et al. 2012 (32) | Sequential Non-Randomized, Cross-Over Dietary Intervention           | Single SNP* | Healthy men and women aged 35-70 years (n=88)                | 8 weeks per diet | <i>APOE</i> , rs429358, rs7412                                         | <i>APOE</i> : 19q13.32  | <b>Low-Fat:</b><br>4.0 mg/day EPA, 10.6 mg/d DPA, 11.7 mg/d DHA<br><b>High-SFA:</b><br>20.2 mg/d EPA, 27.1 mg/d DPA, 15.4 mg/d DHA<br><b>High-SFA+DHA:</b><br>524.3 mg/d EPA, 215.5 mg/d DPA, 3017.3 mg/d DHA [actual intakes reported (33)] (supplemental DHA for High-SFA+DHA; others from food sources) | <i>APOE</i> -E3/3 vs. <i>APOE</i> -E3/4                                          | apoB<br>apoC-III<br>apoE<br>HDL-c<br>LDL-c<br>sdLDL-c<br>TG<br>Total-c | <b>TG:</b> Significant diet x genotype interaction for TG; greater TG lowering response to high-SFA+DHA diet in <i>APOE</i> -E3/4 carriers (compared to high-SFA diet alone)                                                                                                                        |
| 15 |                                 |                                                                      |             |                                                              |                  |                                                                        |                         |                                                                                                                                                                                                                                                                                                            |                                                                                  |                                                                        |                                                                                                                                                                                                                                                                                                     |
| 16 |                                 |                                                                      |             |                                                              |                  |                                                                        |                         |                                                                                                                                                                                                                                                                                                            |                                                                                  |                                                                        |                                                                                                                                                                                                                                                                                                     |
| 17 |                                 |                                                                      |             |                                                              |                  |                                                                        |                         |                                                                                                                                                                                                                                                                                                            |                                                                                  |                                                                        |                                                                                                                                                                                                                                                                                                     |
| 18 |                                 |                                                                      |             |                                                              |                  |                                                                        |                         |                                                                                                                                                                                                                                                                                                            |                                                                                  |                                                                        |                                                                                                                                                                                                                                                                                                     |
| 19 |                                 |                                                                      |             |                                                              |                  |                                                                        |                         |                                                                                                                                                                                                                                                                                                            |                                                                                  |                                                                        |                                                                                                                                                                                                                                                                                                     |
| 20 |                                 |                                                                      |             |                                                              |                  |                                                                        |                         |                                                                                                                                                                                                                                                                                                            |                                                                                  |                                                                        |                                                                                                                                                                                                                                                                                                     |
| 21 |                                 |                                                                      |             |                                                              |                  |                                                                        |                         |                                                                                                                                                                                                                                                                                                            |                                                                                  |                                                                        |                                                                                                                                                                                                                                                                                                     |
| 22 |                                 |                                                                      |             |                                                              |                  |                                                                        |                         |                                                                                                                                                                                                                                                                                                            |                                                                                  |                                                                        |                                                                                                                                                                                                                                                                                                     |
| 23 | Caslake et al. 2008 (34)        | Double-Blind, Randomized, Placebo-Controlled, Crossover Intervention | Single SNP* | Healthy men and women aged 20-70 years (n=312)               | 8 weeks per diet | <i>APOE</i> , rs429358, rs7412                                         | <i>APOE</i> : 19q13.32  | Control oil: 0.0 g/d EPA and DHA<br>Fish oil: 0.7 g/d EPA and DHA<br>Fish oil: 1.8 g/d EPA and DHA (supplement)                                                                                                                                                                                            | <i>APOE</i> -E2/E2 + E2/E3 vs. <i>APOE</i> -E3/E3 vs. <i>APOE</i> -E3/E4 + E4/E4 | HDL-c<br>LDL-c<br>TG<br>Total-c                                        | <b>TG:</b> Significant interaction between treatment x sex x genotype whereby <i>APOE</i> -E3/E4 + E4/E4 males exhibited the greatest TG reductions with both 0.7 g/d EPA and DHA as well as 1.8 g/d EPA and DHA compared to other genotypes                                                        |
| 24 |                                 |                                                                      |             |                                                              |                  |                                                                        |                         |                                                                                                                                                                                                                                                                                                            |                                                                                  |                                                                        |                                                                                                                                                                                                                                                                                                     |
| 25 |                                 |                                                                      |             |                                                              |                  |                                                                        |                         |                                                                                                                                                                                                                                                                                                            |                                                                                  |                                                                        |                                                                                                                                                                                                                                                                                                     |
| 26 |                                 |                                                                      |             |                                                              |                  |                                                                        |                         |                                                                                                                                                                                                                                                                                                            |                                                                                  |                                                                        |                                                                                                                                                                                                                                                                                                     |
| 27 |                                 |                                                                      |             |                                                              |                  |                                                                        |                         |                                                                                                                                                                                                                                                                                                            |                                                                                  |                                                                        |                                                                                                                                                                                                                                                                                                     |
| 28 | Cormier et al. 2012 (35)        | Single Arm Clinical Trial                                            | Single SNP  | Healthy men and women aged 18-50 years (n=208)               | 6 weeks          | <i>FADS</i> gene cluster (19 SNPs) [outlined in Supplementary Table 5] | <i>FADS</i> : 11q12.2   | Fish oil: 5.0 g/day containing 1.9 g/day EPA and 1.1 g/day DHA (supplement)                                                                                                                                                                                                                                | Major allele homozygotes vs. Minor allele carriers                               | TG                                                                     | --                                                                                                                                                                                                                                                                                                  |
| 29 |                                 |                                                                      |             |                                                              |                  |                                                                        |                         |                                                                                                                                                                                                                                                                                                            |                                                                                  |                                                                        |                                                                                                                                                                                                                                                                                                     |
| 30 |                                 |                                                                      |             |                                                              |                  |                                                                        |                         |                                                                                                                                                                                                                                                                                                            |                                                                                  |                                                                        |                                                                                                                                                                                                                                                                                                     |
| 31 |                                 |                                                                      |             |                                                              |                  |                                                                        |                         |                                                                                                                                                                                                                                                                                                            |                                                                                  |                                                                        |                                                                                                                                                                                                                                                                                                     |
| 32 | Dang et al. 2015 (36)           | Single Arm Clinical Trial                                            | Single SNP* | Healthy men and women aged 20-35 years (n=80)                | 4 weeks          | <i>APOE</i> , rs429358, rs7412                                         | <i>APOE</i> : 19q13.32  | Fish oil containing 900 mg EPA and 680 mg DHA (supplement)                                                                                                                                                                                                                                                 | <i>APOE</i> -E4+ vs. <i>APOE</i> -E4-                                            | HDL-c<br>LDL-c<br>TG<br>Total-c                                        | --                                                                                                                                                                                                                                                                                                  |
| 33 |                                 |                                                                      |             |                                                              |                  |                                                                        |                         |                                                                                                                                                                                                                                                                                                            |                                                                                  |                                                                        |                                                                                                                                                                                                                                                                                                     |
| 34 |                                 |                                                                      |             |                                                              |                  |                                                                        |                         |                                                                                                                                                                                                                                                                                                            |                                                                                  |                                                                        |                                                                                                                                                                                                                                                                                                     |
| 35 |                                 |                                                                      |             |                                                              |                  |                                                                        |                         |                                                                                                                                                                                                                                                                                                            |                                                                                  |                                                                        |                                                                                                                                                                                                                                                                                                     |
| 36 |                                 |                                                                      |             |                                                              |                  |                                                                        |                         |                                                                                                                                                                                                                                                                                                            |                                                                                  |                                                                        |                                                                                                                                                                                                                                                                                                     |
| 37 | Dawczynski et al. 2013 (37)     | Randomized, Placebo-Controlled, Double-Blind Intervention            | Single SNP  | Men and women with TG ≥ 1.7 mmol/L, otherwise healthy (n=47) | 10 weeks         | <i>CD36</i> , rs1761667, rs1049673                                     | <i>CD36</i> : 7q21.11   | Yogurt with lower dose fish oil: 0.8g/day omega-3 containing 0.01g ALA, 0.44g EPA, 0.06g DPA and 0.31g DHA (fish oil)<br><br>Yogurt with higher dose fish oil: 3.0 g/day omega-3                                                                                                                           | Comparison between three genotypes                                               | HDL-c<br>TG                                                            | <b>HDL-c:</b> In response to omega-3 supplementation (0.8-3.0 g/day), HDL-c increased in GA genotype of <i>CD36</i> rs1761667 and CG genotype of <i>CD36</i> rs1049673.<br><b>TG:</b> In response to omega-3 supplementation (0.8-3.0 g/day), TG decreased in GA genotype of <i>CD36</i> rs1761667. |
| 38 |                                 |                                                                      |             |                                                              |                  |                                                                        |                         |                                                                                                                                                                                                                                                                                                            |                                                                                  |                                                                        |                                                                                                                                                                                                                                                                                                     |
| 39 |                                 |                                                                      |             |                                                              |                  |                                                                        |                         |                                                                                                                                                                                                                                                                                                            |                                                                                  |                                                                        |                                                                                                                                                                                                                                                                                                     |
| 40 |                                 |                                                                      |             |                                                              |                  |                                                                        |                         |                                                                                                                                                                                                                                                                                                            |                                                                                  |                                                                        |                                                                                                                                                                                                                                                                                                     |
| 41 |                                 |                                                                      |             |                                                              |                  |                                                                        |                         |                                                                                                                                                                                                                                                                                                            |                                                                                  |                                                                        |                                                                                                                                                                                                                                                                                                     |



1  
2  
3  
4  
5  
6  
7  
8  
9  
10  
11  
12  
13  
14  
15  
16  
17  
18  
19  
20  
21  
22  
23  
24  
25  
26  
27  
28  
29  
30  
31  
32  
33  
34  
35  
36  
37  
38  
39  
40  
41  
42  
43  
44  
45  
46  
47

|                           |                                                                 |                              |                                                                                         |                                  |                                                                                                      |                                                 |                                                                                                                   |                                                                                                                                                                                                                                                                |                                                                  |                                                                                                                                                                                                                                                                                                                                                                      |
|---------------------------|-----------------------------------------------------------------|------------------------------|-----------------------------------------------------------------------------------------|----------------------------------|------------------------------------------------------------------------------------------------------|-------------------------------------------------|-------------------------------------------------------------------------------------------------------------------|----------------------------------------------------------------------------------------------------------------------------------------------------------------------------------------------------------------------------------------------------------------|------------------------------------------------------------------|----------------------------------------------------------------------------------------------------------------------------------------------------------------------------------------------------------------------------------------------------------------------------------------------------------------------------------------------------------------------|
|                           |                                                                 |                              |                                                                                         |                                  |                                                                                                      |                                                 | containing 0.07g ALA, 1.59g EPA, 0.23g DPA and 1.12g DHA (fish oil)                                               |                                                                                                                                                                                                                                                                |                                                                  |                                                                                                                                                                                                                                                                                                                                                                      |
|                           |                                                                 |                              |                                                                                         |                                  |                                                                                                      |                                                 | Control yogurt: commercial whole fruit yogurt with 3.5% milk fat (food)                                           |                                                                                                                                                                                                                                                                |                                                                  |                                                                                                                                                                                                                                                                                                                                                                      |
| Ferguson et al. 2010 (38) | Randomized Intervention and Cross-Sectional (Baseline) Analysis | Single SNP                   | Men and women with metabolic syndrome from LIPGENE cohort (n=450)                       | 12 weeks                         | NOS3, rs11771443, rs1800783, rs1800779, rs1799983, rs3918227, rs743507                               | NOS3: 7q36.1                                    | 1.24 g/d EPA+DHA supplement (intervention); quantity of omega-3 not reported for observational analyses           | Major allele homozygotes vs. Minor allele carriers                                                                                                                                                                                                             | apoA-I apoB apoB-48 apoC-II apoC-III apoE HDL-c LDL-c TG Total-c | TG: For NOS3 rs1799983 minor-allele (A) carriers only, the observational analysis indicated higher TG with lower EPA+DHA intake (and lower TG with higher EPA+DHA intake). Post-intervention with omega-3 supplementation indicated that only minor-allele (A) carriers exhibited significant TG reduction (accompanied by increases in plasma omega-3).             |
| Harsløf et al. 2014 (39)  | Randomized, Controlled Intervention                             | Single SNP and Genetic Score | Infants of Danish ancestry (n=133)                                                      | 9 months                         | PPARγ2, Pro12Ala (rs1801282), FADS1, rs1535, FADS2, rs174575, FADS3, rs174448 COX2, rs5275, rs689466 | PPARγ2: 3p25.2 FADS: 11q12.2 COX2: 1q25.2-q25.3 | 5.0 mL/day fish oil (median reported intake: 3.8 g/day containing 630 mg/day EPA and 620 mg/day DHA) (supplement) | PPARγ2 genotype analyses were by major allele homozygotes vs. heterozygotes and FADS genotype analyses were by the number of DHA-increasing alleles and COX2 genotype analyses were by major allele homozygotes vs. heterozygotes vs. minor allele homozygotes | HDL-c LDL-c TG Total-c                                           | TG: PPARγ2 heterozygotes exhibited reduced TG in response to omega-3 when compared to PPARγ2 heterozygotes in the control (sunflower oil) group                                                                                                                                                                                                                      |
| Itariu et al. 2012 (40)   | Randomized, Controlled Intervention                             | Single SNP                   | Men and women without diabetes with a BMI ≥40 kg/m <sup>2</sup> aged 20-65 years (n=55) | 8 weeks                          | PPARγ2, Pro12Ala (rs1801282)                                                                         | PPARγ2: 3p25.2                                  | Fish oil containing 3.4 g/day EPA + DHA (supplement)                                                              | PPARγ2, Ala12 carriers vs. Pro12Pro                                                                                                                                                                                                                            | apoB HDL-c LDL-c TG Total-c                                      | apoB: Significant increases in apoB with omega-3 intervention in Ala12 carriers when compared to Pro12 carriers. Total-c: Significant interaction effect whereby increases in total-c were exhibited with omega-3 intervention in Ala12 carriers when compared to the Pro12Pro genotype.                                                                             |
| Jackson et al. 2012 (41)  | Non-Randomized Intervention                                     | Single SNP*                  | Healthy men aged 35-70 years (n=23)                                                     | 8 weeks and 480-min postprandial | APOE, rs429358, rs7412                                                                               | APOE: 19q13.32                                  | Fish oil containing 3.45 g/day DHA (supplement)                                                                   | APOE-E3/3 vs. APOE-E3/4                                                                                                                                                                                                                                        | apoB apoC-III apoE HDL-c LDL-c TG                                | TG: APOE-E3/E4 exhibited reduced fasting TG in response to a high saturated fat + DHA intervention when compared to the high saturated fat diet alone. There was also a significant interaction (meal x time x genotype) for the postprandial TG lowering response whereby APOE-E3/4 consuming a high saturated fat + DHA intervention exhibited significantly lower |

1  
2  
3  
4  
5  
6  
7  
8  
9  
10  
11  
12  
13  
14  
15  
16  
17  
18  
19  
20  
21  
22  
23  
24  
25  
26  
27  
28  
29  
30  
31  
32  
33  
34  
35  
36  
37  
38  
39  
40  
41  
42  
43  
44  
45  
46  
47

|                           |                                     |             |                                                                     |                      |                                                                                                                                                             |                                                                                                                          |                                                                                                                                                                                 |                                                                                                                                  |                                     |                                                                                                                                                                                                                                                                                                                                                                                                                                                                                                                                                                                                                                                                                                                                                                                               |
|---------------------------|-------------------------------------|-------------|---------------------------------------------------------------------|----------------------|-------------------------------------------------------------------------------------------------------------------------------------------------------------|--------------------------------------------------------------------------------------------------------------------------|---------------------------------------------------------------------------------------------------------------------------------------------------------------------------------|----------------------------------------------------------------------------------------------------------------------------------|-------------------------------------|-----------------------------------------------------------------------------------------------------------------------------------------------------------------------------------------------------------------------------------------------------------------------------------------------------------------------------------------------------------------------------------------------------------------------------------------------------------------------------------------------------------------------------------------------------------------------------------------------------------------------------------------------------------------------------------------------------------------------------------------------------------------------------------------------|
|                           |                                     |             |                                                                     |                      |                                                                                                                                                             |                                                                                                                          |                                                                                                                                                                                 |                                                                                                                                  | Total-c                             | postprandial TG, TG area under the curve, and TG maximum concentration compared to those consuming the high saturated fat diet alone.                                                                                                                                                                                                                                                                                                                                                                                                                                                                                                                                                                                                                                                         |
| Jackson et al. 2017 (42)  | Non-Randomized Intervention         | Single SNP* | Healthy men aged 35-70 years (n=23)                                 | 480-min postprandial | <i>APOE</i> , rs429358, rs7412                                                                                                                              | <i>APOE</i> : 19q13.32                                                                                                   | Fish oil containing 3.45 g/day DHA (supplement)                                                                                                                                 | <i>APOE</i> -E3/3 vs. <i>APOE</i> -E3/4                                                                                          | apoB-48<br>apoB-100                 | --                                                                                                                                                                                                                                                                                                                                                                                                                                                                                                                                                                                                                                                                                                                                                                                            |
| Lindi et al. 2003 (43)    | Randomized Intervention             | Single SNP  | Healthy men and women aged 30-65 years (n=150)                      | 3 months             | <i>PPAR</i> $\gamma$ 2, Pro12Ala (rs1801282)                                                                                                                | <i>PPAR</i> $\gamma$ 2: 3p25.2                                                                                           | Fish oil containing 2.4 g/d EPA + DHA (supplement)                                                                                                                              | <i>PPAR</i> $\gamma$ 2, Ala12 carriers vs. Pro12Pro                                                                              | HDL-c<br>LDL-c<br>TG<br>Total-c     | <b>TG:</b> Compared to Pro12Pro, Ala12 carriers exhibited significantly greater TG reductions in response to omega-3 supplementation only when total fat intake was $\leq$ 37 %kcal or SFA intake was $\leq$ 10 %kcal                                                                                                                                                                                                                                                                                                                                                                                                                                                                                                                                                                         |
| Lindman et al. (44)       | Randomized, Controlled Intervention | Single SNP  | Men at high risk of cardiovascular disease aged 65-75 years (n=204) | 6 months             | <i>FVII</i> , rs6046                                                                                                                                        | <i>FVII</i> : 13q34                                                                                                      | Fish oil containing 2.4 g/d EPA + DHA<br><br>Dietary advice including recommendations to increase omega-3 (supplement and food)                                                 | Major allele homozygotes vs. Minor allele carriers                                                                               | TG                                  | --                                                                                                                                                                                                                                                                                                                                                                                                                                                                                                                                                                                                                                                                                                                                                                                            |
| Madden et al. 2008 (45)   | Non-Randomized Intervention         | Single SNP  | Healthy men aged 43-84 years (n=111)                                | 12 weeks             | <i>CD36</i> , rs1527483, rs1049673, rs1761667, rs1984112                                                                                                    | <i>CD36</i> : 7q21.11                                                                                                    | Fish oil containing 1.02 g/d EPA and 0.69 g/d DHA (supplement)                                                                                                                  | For each SNP: AA vs. AG vs. GG                                                                                                   | HDL-c<br>LDL-c<br>LDL-c:HDL-c<br>TG | <b>TG:</b> In response to omega-3 supplementation, TG significantly reduced only in individuals with the GG genotype, for each SNP individually (i.e. for rs1527483, rs1049673, rs1761667 and rs1984112 individually)<br><b>LDL-c:</b> In response to omega-3 supplementation, LDL-c increased only in individuals with the rs1761667 AA genotype as well as for individuals with the rs1984112 AA genotype<br><b>HDL-c:</b> In response to omega-3 supplementation, HDL-c significantly increased in individuals with rs1761667 AA or AG as well as for individuals with the CC or CG genotype for either rs1984112, rs1527483 and/or rs1049673; NOTE: rs1527483 results should be interpreted with caution due to low sample sizes for AA and AG genotypes thus reducing statistical power) |
| Markovic et al. 2004 (46) | Single-Arm Clinical Trial           | Single SNP  | Healthy men (n=159)                                                 | 12 weeks             | <i>TNF</i> $\alpha$ , -308 (rs1800629)<br><i>LT</i> - $\alpha$ , +252 (rs909253)<br><i>IL</i> -1 $\beta$ , -511 (rs16944)<br><i>IL</i> -6, -174 (rs1800795) | <i>TNF</i> $\alpha$ : 6p21.33<br><i>LT</i> - $\alpha$ : 6p21.33<br><i>IL</i> -1 $\beta$ : 2q14.1<br><i>IL</i> -6: 7p15.3 | Fish oil containing 1.8 g/d EPA+DHA (supplement)                                                                                                                                | Major allele homozygotes vs. Minor allele carriers<br>or<br>Comparison between three genotypes (depending on allele frequencies) | TG                                  | <b>TG:</b> Significant negative correlation between pre-supplementation TG and change of TG during omega-3 supplementation for all genotypes of genes studied except for <i>LT</i> - $\alpha$ rs909253 GG genotype and <i>IL</i> -1 $\beta$ rs16944 TT genotype. In <i>LT</i> - $\alpha$ rs909253 AA genotype and <i>TNF</i> $\alpha$ rs1800629 AA genotype, signification association between BMI (divided in tertiles) and TG changes.                                                                                                                                                                                                                                                                                                                                                      |
| McColley et al. 2011 (47) | Crossover Intervention              | Single SNP  | Healthy post-menopausal women (n=16)                                | 8 weeks per diet     | <i>FABP</i> 2, rs1799883                                                                                                                                    | <i>FABP</i> 2: 4q26                                                                                                      | <b>High-Fat:</b> 50 %kcal from dietary fat<br><b>Low-Fat:</b> 20 %kcal from dietary fat<br><b>Low-Fat + omega-3:</b> 23% kcal from dietary fat with 3 %kcal from omega-3 (food) | Major allele homozygotes vs. Minor allele carriers                                                                               | TG                                  | --                                                                                                                                                                                                                                                                                                                                                                                                                                                                                                                                                                                                                                                                                                                                                                                            |

1  
2  
3  
4  
5  
6  
7  
8  
9  
10  
11  
12  
13  
14  
15  
16  
17  
18  
19  
20  
21  
22  
23  
24  
25  
26  
27  
28  
29  
30  
31  
32  
33  
34  
35  
36  
37  
38  
39  
40  
41  
42  
43  
44  
45  
46  
47

|                                                    |                               |                                                                      |             |                                                                                  |                                              |                                                                                                            |                                                                          |                                                                                                                         |                                                                                                                            |                                                              |                                                                                                                                                                                                                                                                                                                                                                                                                                                                                                                                                                                                                                                                                                                                                                       |
|----------------------------------------------------|-------------------------------|----------------------------------------------------------------------|-------------|----------------------------------------------------------------------------------|----------------------------------------------|------------------------------------------------------------------------------------------------------------|--------------------------------------------------------------------------|-------------------------------------------------------------------------------------------------------------------------|----------------------------------------------------------------------------------------------------------------------------|--------------------------------------------------------------|-----------------------------------------------------------------------------------------------------------------------------------------------------------------------------------------------------------------------------------------------------------------------------------------------------------------------------------------------------------------------------------------------------------------------------------------------------------------------------------------------------------------------------------------------------------------------------------------------------------------------------------------------------------------------------------------------------------------------------------------------------------------------|
| 3<br>4<br>5<br>6<br>7                              | Minihane et al. 2000 (48)     | Double-Blind, Randomized, Placebo-Controlled, Crossover Intervention | Single SNP* | Healthy men aged 30-70 years at risk of atherogenic lipoprotein phenotype (n=50) | 6 weeks per diet and 480 minute postprandial | <i>APOE</i> , rs429358, rs7412                                                                             | <i>APOE</i> : 19q13.32                                                   | Fish oil containing 3.0 g/d EPA and DHA, Control oil: 6.0 g/d olive oil capsule (supplement)                            | <i>APOE</i> -E2/E3 vs. <i>APOE</i> -E3/E3 vs. <i>APOE</i> -E3/E4 + E4/E4                                                   | HDL-c<br>LDL-c<br>TG<br>Total-c<br>Total-c:HDL               | <b>TG</b> : Postprandial: Significantly greater reduction in TG incremental area under postprandial TG curve in <i>APOE</i> -E2/E3 relative to other <i>APOE</i> genotype categories<br><b>Total-c</b> : 6-week: <i>APOE</i> -E3/E4 + E4/E4 genotype group exhibited significantly different changes in total-c (increase), relative to other <i>APOE</i> genotypes, whereby reductions in total-c occurred                                                                                                                                                                                                                                                                                                                                                           |
| 8<br>9<br>10<br>11<br>12<br>13                     | Olano-Martin et al. 2010 (49) | Randomized, Cross-Over Intervention                                  | Single SNP* | Healthy normolipidemic men (n=38)                                                | 4 weeks per diet                             | <i>APOE</i> , rs429358, rs7412                                                                             | <i>APOE</i> : 19q13.32                                                   | EPA-rich fish oil: 3.3 g/d EPA<br>DHA-rich fish oil: 3.7 g/d DHA<br>Control oil: 80:20 palm olein:soyabean (supplement) | <i>APOE</i> -E3/3 vs. <i>APOE</i> -E3/4 (carriers)                                                                         | apoB<br>apoE<br>HDL-c<br>LDL-c<br>TG<br>TG:HDL-c<br>Total-c  | <b>apoB, LDL-c</b> : In <i>APOE</i> -E4 carriers only, DHA-rich oil treatment resulted in significant increases in apoB and LDL-c<br><b>TG</b> : Significant reduction in TG in response to both EPA and DHA in <i>APOE</i> -E3/E3 group; significant reduction in TG in <i>APOE</i> -E4 carriers with EPA only. No significant interactions.<br><b>Total-c</b> : Significant genotype x treatment interaction whereby <i>APOE</i> -E4 carriers exhibit total-c reductions in response to EPA-rich oil.                                                                                                                                                                                                                                                               |
| 14<br>15<br>16<br>17<br>18<br>19                   | Quellette et al. 2013 (50)    | Single-Arm Clinical Trial                                            | Single SNP  | Healthy men and women aged 18-50 (n=210)                                         | 6 weeks                                      | <i>GPAM</i> (3 SNPs), <i>AGPAT3</i> (13 SNPs), <i>AGPAT4</i> (35 SNPs) [outlined in Supplementary Table 5] | <i>GPAM</i> : 10q25.2<br><i>AGPAT3</i> : 21q22.3<br><i>AGPAT4</i> : 6q26 | Fish oil containing 1.9-2.2 g/d EPA + 1.1 g/d DHA (supplement)                                                          | Major allele homozygotes vs. Minor allele carriers or Comparison between three genotypes (depending on allele frequencies) | HDL-c<br>LDL-c<br>TG<br>Total-c                              | <b>LDL-c</b> : Significant <i>GPAM</i> , rs2792751 genotype x supplementation interaction on LDL-c<br><b>TG</b> : Significant genotype x supplementation interaction on TG for <i>GPAM</i> , rs2792751 and rs17129561 as well as <i>AGPAT4</i> , rs9458172 and rs3798943                                                                                                                                                                                                                                                                                                                                                                                                                                                                                              |
| 20<br>21<br>22<br>23<br>24<br>25<br>26<br>27<br>28 | Quellette et al. 2014 (51)    | Single-Arm Clinical Trial                                            | Single SNP  | Healthy men and women 18-50 years (n=208)                                        | 6 weeks                                      | <i>MGLL</i> (18 SNPs) [outlined in Supplementary Table 5]                                                  | <i>MGLL</i> : 3q21.3                                                     | Fish oil containing 1.9-2.2 g/d EPA + 1.1 g/d DHA (supplement)                                                          | Major allele homozygotes vs. Minor allele carriers or Comparison between three genotypes (depending on allele frequencies) | apoB<br>HDL-c<br>LDL-c<br>LDL particle size<br>TG<br>Total-c | <b>LDL-c</b> : Significant interactions for <i>MGLL</i> rs6776142, rs555183, rs782444, rs6787155 and rs1466571 whereby omega-3 supplementation modulated LDL-c levels; rs782444 and rs555183 minor allele homozygotes more likely to be negative responders to omega-3 supplementation (i.e. exhibit reduced LDL-c); rs6780384, rs782444 and rs6787155 major allele homozygotes more likely to be negative responders to omega-3 supplementation<br><b>LDL particle size</b> : Significant interactions for <i>MGLL</i> rs782440, rs13076543 and rs9877819 whereby omega-3 supplementation modulated LDL particle size; rs549662 minor allele homozygotes more likely to be positive responders to omega-3 supplementation (i.e. exhibit increased LDL particle size) |
| 29<br>30<br>31<br>32                               | Paschos et al. 2005 (52)      | Single-Arm Clinical Trial                                            | Single SNP* | Men with dyslipidemia, aged 35 to 67 years (n=50)                                | 12 weeks                                     | <i>APOE</i> , rs429358, rs7412                                                                             | <i>APOE</i> : 19q13.32                                                   | 8.1 g/day ALA (via 15 ml of Flaxseed oil supplementation)                                                               | <i>APOE</i> -E2/E3 vs. <i>APOE</i> -E3/E3 vs. <i>APOE</i> -E3/E4                                                           | ApoA-I<br>ApoB<br>HDL-c<br>LDL-c<br>TG<br>Total-c            | <b>ApoA-I</b> : Significant decrease in E3/E3<br><b>HDL-c</b> : Significant decrease in E3/E3                                                                                                                                                                                                                                                                                                                                                                                                                                                                                                                                                                                                                                                                         |
| 33<br>34<br>35<br>36<br>37<br>38<br>39<br>40       | Pishva et al. 2010 (53)       | Single-Arm Clinical Trial                                            | Single SNP  | Adults with hypertriglyceridemia (n=46)                                          | 8 weeks                                      | <i>FABP2</i> , Ala54Thr (rs1799883)                                                                        | <i>FABP2</i> : 4q26                                                      | 2.0 g/day pure EPA (supplement)                                                                                         | Ala54Ala (GG) vs. Thr54 carriers (GT+TT)                                                                                   | ApoB<br>ApoC-III<br>HDL-c<br>LDL-c<br>TG<br>Total-c          | <b>ApoC-III</b> : In response to EPA supplementation, significantly greater reductions in ApoC-III in GT+TT genotypes of rs1799883 compared to GG genotype.<br><b>HDL-c</b> : In response to EPA supplementation, significantly greater increases in HDL-c in GT+TT genotypes of rs1799883 compared to GG genotype.<br><b>LDL-c</b> : In response to EPA supplementation, LDL-c significantly decreased in GG genotypes of rs1799883 but not GT+TT genotypes.<br><b>TG</b> : In response to EPA supplementation, significantly greater reductions in TG in GT+TT genotypes of rs1799883 compared to GG genotype.                                                                                                                                                      |
| 41                                                 | Pishva et al.                 | Single-Arm                                                           | Single SNP  | Adults with                                                                      | 8 weeks                                      | <i>PPARα</i> ,                                                                                             | <i>PPARα</i> : 22q13.31                                                  | 2.0 g/day pure                                                                                                          | Leu162                                                                                                                     | ApoB                                                         | --                                                                                                                                                                                                                                                                                                                                                                                                                                                                                                                                                                                                                                                                                                                                                                    |

|                            |                                                           |                   |                                                                                       |                            |                                                                                                                                                                                                                                 |                                                                                                                                                          |                                                                  |                                                                                                        |                                                  |                                                                                                                                                                                                                                                                                                                                                                                                                                         |
|----------------------------|-----------------------------------------------------------|-------------------|---------------------------------------------------------------------------------------|----------------------------|---------------------------------------------------------------------------------------------------------------------------------------------------------------------------------------------------------------------------------|----------------------------------------------------------------------------------------------------------------------------------------------------------|------------------------------------------------------------------|--------------------------------------------------------------------------------------------------------|--------------------------------------------------|-----------------------------------------------------------------------------------------------------------------------------------------------------------------------------------------------------------------------------------------------------------------------------------------------------------------------------------------------------------------------------------------------------------------------------------------|
| 2014 (54)                  | Clinical Trial                                            |                   | hypertriglyceridemia (n=46)                                                           |                            | Leu162Val (rs1800206)<br><i>PPARα</i> ,<br>Intron 7 SNP                                                                                                                                                                         |                                                                                                                                                          | EPA (supplement)                                                 | vs. Val162 carriers<br><br><i>and</i><br>Intron 7 GG vs Intron 7 GC                                    | ApoCIII<br>HDL-c<br>LDL-c<br>TG<br>Total-c       |                                                                                                                                                                                                                                                                                                                                                                                                                                         |
| Roke and Mutch, 2014 (55)  | Single-Arm Clinical Trial                                 | Single SNP        | Men aged 18-25 years (n=12)                                                           | 12 weeks (+8 week washout) | <i>FADS1</i> , rs174537<br><i>FADS2</i> , rs174576 (LD=1.0 therefore presented results for rs174537)                                                                                                                            | <i>FADS1/2</i> : 11q12.2                                                                                                                                 | Fish oil containing 1.8 g/d EPA+DHA (supplement)                 | Major allele homozygotes vs. Minor allele carriers                                                     | HDL-c<br>LDL-c<br>TG<br>Total-c<br>Total-c:HDL-c | --                                                                                                                                                                                                                                                                                                                                                                                                                                      |
| Rudkowska et al. 2014 (56) | Single-Arm Clinical Trial                                 | Single SNP        | Healthy men and women aged 18-50 (n=210)                                              | 6 weeks                    | <i>SCD1</i> , rs1502593, rs522951, rs11190480, rs3071, rs3829160, rs2234970, rs10883463, rs508384                                                                                                                               | <i>SCD1</i> : 10q24.31                                                                                                                                   | Fish oil containing 1.9-2.2 g/d EPA + 1.1 g/d DHA (supplement)   | Comparison between three genotypes                                                                     | HDL-c<br>LDL-c<br>TG<br>Total-c<br>Total-c:HDL-c | <b>TG:</b> For <i>SCD1</i> rs508384, AA genotype was associated with lower TG than CA and CC genotypes both pre- and post-supplementation.                                                                                                                                                                                                                                                                                              |
| Rudkowska et al. 2014 (57) | Single-Arm Clinical Trial                                 | Nutrigenomic GWAS | Healthy men and women aged 18-50 (n=141) + Replication of GRS in FINGEN study (n=310) | 6 weeks                    | Genetic Risk Score including:<br><i>IQCJ-SCHIP1</i> (4 SNPs),<br><i>SLIT2</i> (3 SNPs),<br><i>PHF17</i> (3 SNPs),<br><i>MYB</i> (1 SNP),<br><i>NXP1</i> (1 SNP),<br><i>NELL1</i> (1 SNP)<br>[outlined in Supplementary Table 5] | <i>IQCJ-SCHIP1</i> : 3q25.32<br><i>SLIT2</i> : 4p15.31<br><i>PHF17</i> : 4q28.2<br><i>MYB</i> : 6q23.3<br><i>NXP1</i> : 7p21.3<br><i>NELL1</i> : 11p15.1 | Fish oil containing 1.9-2.2 g/d EPA + 1.1 g/d DHA (supplement)   | Responders versus non-responders (i.e. TG response) to supplementation                                 | TG                                               | Thirteen SNPs were associated with TG response to omega-3 supplementation and 10 were used in the GRS calculation. The GRS was significantly associated with TG response.<br><br><b>TG:</b> The GRS explained 21.5% of the variation in TG response when adjusted for age, sex and BMI. Replication of this GRS in the FINGEN study: the GRS explained 2.0% of the TG change but the association as NS (adjusted for age, sex and BMI). |
| Scorletti et al. 2015 (58) | Randomized, Placebo-Controlled, Double-Blind Intervention | Single SNP        | Men and women with non-alcoholic fatty liver disease (n=95)                           | 15-18 months               | <i>PNPLA3</i> , 1148M (rs738409)<br><i>TM6SF2</i> , E167K (rs58542926)                                                                                                                                                          | <i>PNPLA3</i> : 22q13.31<br><i>TM6SF2</i> : 19p13.11                                                                                                     | 1.8 g/day EPA+ 1.5 g/day DHA (supplement)                        | Comparison between three genotypes<br><i>and</i><br>Major allele homozygotes vs. Minor allele carriers | TG                                               | --                                                                                                                                                                                                                                                                                                                                                                                                                                      |
| Thifault et al. 2013 (59)  | Single-Arm Clinical Trial                                 | Single SNP*       | Healthy men and women with overweight or obesity aged 18-50 (n=210)                   | 6 weeks                    | <i>APOE</i> , rs429358, rs7412                                                                                                                                                                                                  | <i>APOE</i> : 19q13.32                                                                                                                                   | Fish oil containing 1.9-2.2 g/d EPA and 1.1 g/d DHA (supplement) | <i>APOE</i> -E2 vs. <i>APOE</i> -E3 vs. <i>APOE</i> -E4                                                | apoB<br>HDL-c<br>LDL-c<br>TG<br>Total-c          | --                                                                                                                                                                                                                                                                                                                                                                                                                                      |
| Tremblay et                | Single-Arm                                                | Single SNP        | Healthy men                                                                           | 6 weeks                    | <i>PLA2G2A</i> (5)                                                                                                                                                                                                              | <i>PLA2G2A</i> :                                                                                                                                         | Fish oil containing                                              | Major allele                                                                                           | apoB-100                                         | <b>TG:</b> omega-3 supplementation significantly reduced TG in                                                                                                                                                                                                                                                                                                                                                                          |

1  
2

|                                                                      |                                  |                                                                  |                                |                                                                   |                   |                                                                                                                                                                                                                  |                                                                                                                                                                             |                                                                                    |                                                                                                               |                                 |                                                                                                                                                                                                                                                                                                                                                                                                                                                                                                                                                                                                                                                                                                                                                                                                                                                                                                                                                                                                                                                                        |
|----------------------------------------------------------------------|----------------------------------|------------------------------------------------------------------|--------------------------------|-------------------------------------------------------------------|-------------------|------------------------------------------------------------------------------------------------------------------------------------------------------------------------------------------------------------------|-----------------------------------------------------------------------------------------------------------------------------------------------------------------------------|------------------------------------------------------------------------------------|---------------------------------------------------------------------------------------------------------------|---------------------------------|------------------------------------------------------------------------------------------------------------------------------------------------------------------------------------------------------------------------------------------------------------------------------------------------------------------------------------------------------------------------------------------------------------------------------------------------------------------------------------------------------------------------------------------------------------------------------------------------------------------------------------------------------------------------------------------------------------------------------------------------------------------------------------------------------------------------------------------------------------------------------------------------------------------------------------------------------------------------------------------------------------------------------------------------------------------------|
| 3<br>4<br>5<br>6<br>7<br>8<br>9<br>10<br>11<br>12<br>13              | al. 2015 (60)                    | Clinical Trial                                                   |                                | and women aged 18-50 years (n=208)                                |                   | SNPs),<br><i>PLA2G2C</i> (6 SNPs),<br><i>PLA2G2D</i> (8 SNPs),<br><i>PLA2G2F</i> (6 SNPs),<br><i>PLA2G4A</i> (22 SNPs),<br><i>PLA2G6</i> (5 SNPs),<br><i>PLA2G7</i> (9 SNPs) [outlined in Supplementary Table 5] | 1p36.13<br><i>PLA2G2C</i> : 1p36.13<br><i>PLA2G2D</i> : 1p36.12<br><i>PLA2G2F</i> : 1p36.12<br><i>PLA2G4A</i> : 1q31.1<br><i>PLA2G6</i> : 22q13.1<br><i>PLA2G7</i> : 6p12.3 | 1.9 g/d EPA + 1.1 g/d DHA (supplement)                                             | homozygotes vs. Minor allele carriers or Comparison between three genotypes (depending on allele frequencies) | HDL-c<br>LDL-c<br>TG<br>Total-c | <i>PLA2G7</i> rs1805018 as well as <i>PLA2G4A</i> rs10752979, rs10737277, rs7540602 and rs3820185; in the linear regression model, <i>PLA2G6</i> rs132989, <i>PLA2G7</i> rs679667, <i>PLA2G2D</i> rs12045689, <i>PLA2G4A</i> rs 10752979 and rs1160719 together explained 5.9% of post-supplementation TG levels                                                                                                                                                                                                                                                                                                                                                                                                                                                                                                                                                                                                                                                                                                                                                       |
| 14<br>15<br>16<br>17<br>18<br>19<br>20<br>21<br>22<br>23<br>24<br>25 | Vallée Marcotte et al. 2016 (61) | Single-Arm Clinical Trial                                        | Nutrigenomic GWAS              | Men and woman aged 18-50 years (n=208)                            | 6 weeks           | <i>IQCJ</i> (16 SNPs),<br><i>NXPPI</i> (34 SNPs),<br><i>PHF17</i> (8 SNPs),<br><i>MYB</i> (9 SNPs) [outlined in Supplementary Table 5]                                                                           | <i>IQCJ</i> : 3q25.32<br><i>NXPPI</i> : 7p21.3<br><i>PHF17</i> : 4q28.2<br><i>MYB</i> : 6q23.3                                                                              | Fish oil containing 1.9-2.2 g/d EPA + 1.1 g/d DHA (supplement)                     | Comparison between three genotypes                                                                            | TG                              | <b>TG</b> : Significant gene-diet interaction on TG levels pre- vs. post-supplementation for the following SNPs: <i>IQCJ</i> (10 SNPs: rs2044704, rs1962071, rs6800211, rs17782879, rs1868414, rs2595260, rs9827242, rs1449009, rs2621309, rs61332355), <i>NXPPI</i> (4 SNPs: rs7806226, rs7805772, rs2349780, rs6974252), <i>MYB</i> (3 SNPs: rs9321493, rs11154794, rs210962). Four SNPs were still significant after applying the false discovery rate to account for multiple testing: rs1449009, rs2621309, rs61332355 in <i>IQCJ</i> ; rs7805772 in <i>NXPPI</i> . There were four dominant SNPs driving the association with the TG response: rs61332355 and rs9827242 in <i>IQCJ</i> , rs7805772 in <i>NXPPI</i> and rs11154794 in <i>MYB</i> . Significant differences in genotype frequencies between positive and negative responders to omega-3 for TG changes for <i>IQCJ</i> rs2044704, rs1962071, rs17782879, rs1868414, rs2595260, rs9827242, rs1449009, rs2621309, rs61332355, <i>NXPPI</i> rs7806226, rs7805772, <i>MYB</i> rs11154794 and rs210936. |
| 26<br>27<br>28<br>29<br>30<br>31<br>32                               | Vallée Marcotte et al. 2019 (62) | Single-Arm Clinical Trial (replication of GRS in a novel cohort) | Nutrigenomic GWAS              | Healthy adults of Mexican descent aged 18-40 years (n=191)        | 6 weeks           | Genetic Risk Score including 103 SNPs: [outlined in Supplementary Table 5]                                                                                                                                       | NA                                                                                                                                                                          | Fish oil containing 1.9 g/day EPA + 0.8 g/day DHA (supplement)                     | Responders versus non-responders (i.e. TG response) to supplementation                                        | TG                              | <b>TG</b> : A first 7-SNP GRS [SNPs selected based on previously developed GRS (57.61)] did not explain TG variation. A second GRS calculated from 103 SNPs significantly explained 4.4% of TG variation. A third GRS including the 5 most relevant SNPs significantly explained 11.0% of TG variation ( <i>NXPPI</i> rs10265408, rs10486228, rs10486228, rs17150341, rs6974252 and <i>IQCJ-SCHIP1</i> rs2595241). When subjects with the lowest TG change were not included, this third GRS explained more TG variation. Including only the 28 responders and 28 non-responders with the greatest TG variation, this third GRS explained 29.1% of TG variation.                                                                                                                                                                                                                                                                                                                                                                                                       |
| 33<br>34<br>35<br>36<br>37                                           | Vallée Marcotte et al. 2019 (63) | Single-Arm Clinical Trial                                        | Nutrigenomics GWAS (polygenic) | Men and woman aged 18-50 years with overweight or obesity (n=208) | 6 weeks           | GWAS; GRS included 31 SNPs [outlined in Supplementary Table 5]                                                                                                                                                   | NA                                                                                                                                                                          | Fish oil containing 1.9-2.2g/d EPA + 1.1g/d DHA (supplement)                       | Responders to omega-3 supplementation for TG reduction vs. Non-Responders                                     | TG                              | <b>TG</b> : 31 SNPs associated with TG response to omega-3 supplementation and used in GRS calculation; Lower GRSs were significantly more responsive to omega-3 supplementation for TG reduction compared to higher GRS (GRS accounted for 49.7% of TG responses); These findings were replicated in the FINGEN study with 23 SNPs (GRS accounted for 3.7% of TG responses).                                                                                                                                                                                                                                                                                                                                                                                                                                                                                                                                                                                                                                                                                          |
| 38<br>39<br>40<br>41                                                 | Vallée Marcotte et al. 2020 (64) | Double-Blind, Randomized, Controlled, Crossover Intervention     | Nutrigenomics GWAS (polygenic) | Men and women with abdominal obesity and elevated CRP aged 18-70  | 10 weeks per diet | GRS included 30 SNPs [outlined in Supplementary Table 5]                                                                                                                                                         | NA                                                                                                                                                                          | Control oil: 3 g/d corn oil<br>Pure EPA: 2.7 g/d<br>Pure DHA: 2.7 g/d (supplement) | Responders to different types of omega-3 supplementation for TG reduction vs.                                 | TG                              | <b>TG</b> : The GRS was significantly associated with responsiveness to EPA for TG reduction when comparing responders vs. non-responders vs. adverse responders (trend, p=0.08, for DHA). The GRS was significantly associated with responsiveness to both EPA and DHA for TG reduction when comparing responders vs. adverse responders.                                                                                                                                                                                                                                                                                                                                                                                                                                                                                                                                                                                                                                                                                                                             |

42  
43  
44  
45  
46  
47

1  
2

|                                              |                           |                                                                                      |                             |                                                                                                                                          |          |                                                                                          |                                                                         |                                                                                                              |                                                                                                                                       |                                                  |                                                                                                                                                                                                                                                                                                                                                                                                                                                                                                                                                                                                                                                                       |
|----------------------------------------------|---------------------------|--------------------------------------------------------------------------------------|-----------------------------|------------------------------------------------------------------------------------------------------------------------------------------|----------|------------------------------------------------------------------------------------------|-------------------------------------------------------------------------|--------------------------------------------------------------------------------------------------------------|---------------------------------------------------------------------------------------------------------------------------------------|--------------------------------------------------|-----------------------------------------------------------------------------------------------------------------------------------------------------------------------------------------------------------------------------------------------------------------------------------------------------------------------------------------------------------------------------------------------------------------------------------------------------------------------------------------------------------------------------------------------------------------------------------------------------------------------------------------------------------------------|
|                                              |                           |                                                                                      | years (n=122)               |                                                                                                                                          |          |                                                                                          |                                                                         | Non-Responders<br>vs.<br>Adverse Responders<br><i>and</i><br>Responders<br>vs.<br>Adverse Responders         |                                                                                                                                       |                                                  |                                                                                                                                                                                                                                                                                                                                                                                                                                                                                                                                                                                                                                                                       |
| 3<br>4<br>5<br>6<br>7<br>8<br>9<br>10<br>11  | Wu et al. 2014<br>(65)    | Double-Blind,<br>Randomized,<br>Placebo-<br>Controlled,<br>Crossover<br>Intervention | Single SNP                  | Men and<br>women with<br>moderate risk<br>of CVD (n=84)                                                                                  | 8 weeks  | <i>eNOS</i><br>Glu298Asp<br>(rs1799983)                                                  | <i>NOS3</i> : 7q36.1                                                    | Fish oil containing<br>0.9 g/day EPA +<br>0.6 g/day DHA<br>(supplement)                                      | Major allele<br>homozygotes (GG)<br>vs.<br>Minor allele carriers<br>(GT+TT)                                                           | LDL-c<br>HDL-c<br>TG<br>Total-c                  | --                                                                                                                                                                                                                                                                                                                                                                                                                                                                                                                                                                                                                                                                    |
| 12<br>13<br>14<br>15<br>16<br>17<br>18<br>19 | Zheng et al.<br>2018 (66) | Double-Blind,<br>Randomized,<br>Controlled<br>Intervention                           | Single SNP and<br>Polygenic | Men and<br>women with<br>type 2 diabetes<br>aged 35-80<br>years for men<br>or<br>postmenopausa<br>l and 80 years<br>for women<br>(n=139) | 25 weeks | <i>CD36</i> ,<br>rs1527483<br><i>NOS3</i> ,<br>rs1799983<br><i>PPARγ2</i> ,<br>rs1801282 | <i>CD36</i> : 7q21.11<br><i>NOS3</i> : 7q36.1<br><i>PPARγ2</i> : 3p25.2 | Fish oil: 2.0 g/d<br>EPA and DHA<br>Flaxseed oil: 2.5<br>g/d ALA<br>Control oil: corn<br>oil<br>(supplement) | Major allele<br>homozygotes<br>vs.<br>Minor allele carriers<br>and<br>High vs. low genetic<br>score calculated<br>based on three SNPs | HDL-c<br>LDL-c<br>TG<br>Total-c:HDL-c<br>Total-c | <b>LDL-c</b> : significant interaction for <i>PPARγ2</i> rs1801282 genotype, intervention group and LDL-c change; but increased LDL-c in G allele carriers of <i>PPARγ2</i> rs1801282 compared to CC genotype <i>only in the control</i> (corn oil) group<br><b>TG</b> : omega-3 fish oil (but not flaxseed oil) supplementation reduced TG for individuals with the <i>CD36</i> rs1527483 GG genotype (significant interaction); significant interaction between genetic score and omega-3 on TG levels whereby omega-3 (fish oil and flaxseed oil) supplementation significantly reduced TG levels compared to control only in individuals with high genetic scores |

20

21

22

23

24

25

26

27

28

29

30

31

32

33

34

35

36

37

38

39

40

41

42

43

44

45

46

47

ALA: alpha-linolenic acid, Apo: apolipoprotein, DHA: docosahexaenoic acid, EPA: eicosapentaenoic acid, HDL: high-density lipoprotein cholesterol, LDL: low-density lipoprotein cholesterol, omega-3: omega-3, N/A: not applicable, NS: Non-significant, sdLDL-c: small, dense, low-density lipoprotein cholesterol, SNP: single nucleotide polymorphism, TG: triglycerides

1. All other (not listed) gene/omega-3/lipid/lipoprotein results of interest to the present review were NS

Participants are described as "healthy" for studies that incorporated exclusion criteria for certain conditions, blood lipid levels, etc. and when studies described the population as "healthy."

'--' indicates that all the completed gene/omega-3/lipid/lipoprotein analyses were NS

\*Human *APOE* is polymorphic at two single nucleotides (rs429358 and rs7412) resulting in three different alleles ( $\epsilon$  2,  $\epsilon$  3 and  $\epsilon$  4)

**Supplementary Table 4: Genes, SNPs, lipid/lipoprotein outcomes and studies included in evidence grading process and guideline development**

| Gene, SNP(s)                              | Outcome | Studies                                                                                                                                                                                                                                                              |
|-------------------------------------------|---------|----------------------------------------------------------------------------------------------------------------------------------------------------------------------------------------------------------------------------------------------------------------------|
| <i>APOE</i> : rs429358, rs7412 (Genotype) | TG      | AbuMweis et al. 2018 (24)<br>Carvalho-Wells et al. 2012 (32)<br>Caslake et al. 2008 (34)<br>Dang et al. 2015 (36)<br>Jackson et al. 2012 (41)<br>Olano-Martin et al. 2010 (49)<br>Minihane et al. 2000 (48)<br>Paschos et al. 2005 (52)<br>Thifault et al. 2013 (59) |
| <i>APOE</i> : rs429358, rs7412            | Total-c | Fallaize et al. 2016 (7)<br>AbuMweis et al. 2018 (24)<br>Carvalho-Wells et al. 2012 (32)<br>Caslake et al. 2008 (34)<br>Dang et al. 2015 (36)<br>Jackson et al. 2012 (41)<br>Olano-Martin et al. 2010 (49)<br>Paschos et al. 2005 (52)<br>Thifault et al. 2013 (59)  |
| <i>PPAR</i> $\gamma$ 2: rs1801282         | LDL-c   | Binia et al. 2017 (27)<br>Harsløf et al. 2014 (39)<br>Itariu et al. 2012 (40)<br>Lindi et al. 2003 (43)<br>Zheng et al. 2018 (66)                                                                                                                                    |
| <i>PPAR</i> $\gamma$ 2: rs1801282         | Total-c | Binia et al. 2017 (27)<br>Harsløf et al. 2014 (39)<br>Itariu et al. 2012 (40)<br>Lindi et al. 2003 (43)<br>Zheng et al. 2018 (66)                                                                                                                                    |
| <i>PPAR</i> $\gamma$ 2: rs1801282         | TG      | Binia et al. 2017 (27)<br>Harsløf et al. 2014 (39)<br>Itariu et al. 2012 (40)<br>Lindi et al. 2003 (43)<br>Zheng et al. 2018 (66)                                                                                                                                    |
| <i>CD36</i> : rs1761667                   | HDL-c   | Dawczynski et al. 2013 (37)<br>Madden et al. 2008 (45)                                                                                                                                                                                                               |
| <i>CD36</i> : rs1761667                   | TG      | Dawczynski et al. 2013 (37)<br>Madden et al. 2008 (45)                                                                                                                                                                                                               |
| <i>CD36</i> : rs1049673                   | HDL-c   | Dawczynski et al. 2013 (37)<br>Madden et al. 2008 (45)                                                                                                                                                                                                               |
| <i>CD36</i> : rs1527483                   | TG      | Madden et al. 2008 (45)<br>Zheng et al. 2018 (66)                                                                                                                                                                                                                    |
| <i>FADS</i> : rs174547*                   | Total-c | Dumont et al. 2011 (5)<br>Dumont et al. 2018 (6)<br>Lu et al. 2010 (17)<br>Standl et al. 2012 (20)<br>Alsaleh et al. 2014 (25)<br>AbuMweis et al. 2018 (24)<br>Roke et al. 2014 (55)                                                                                 |
| 31-SNP Genetic Risk Score                 | TG      | Vallée Marcotte et al. 2019 (67)<br>Vallée Marcotte et al. 2020 (64)                                                                                                                                                                                                 |

**Supplementary Table 5: Additional list of gene(s) and SNP(s) tested in studies**

| Study                                                     | Gene(s), SNP(s)                                                                                                                                                                                                                                                                                                                                                                                                                                                                                                                                                              |
|-----------------------------------------------------------|------------------------------------------------------------------------------------------------------------------------------------------------------------------------------------------------------------------------------------------------------------------------------------------------------------------------------------------------------------------------------------------------------------------------------------------------------------------------------------------------------------------------------------------------------------------------------|
| Chen et al. Int J Obes;43:808-820 (2019)                  | <p><i>FADS2</i>, rs174599, rs174601, rs556656, rs11501631, rs74771917, rs3168072, rs182008711, rs73487492, rs174602, rs12577276</p> <p><i>FADS3</i>, rs191972868, rs115905177, rs174635, rs174634, rs174454, rs12292968, rs174570, rs7930349, rs116672159, rs116139751, rs7942717, rs7115739, rs174450, rs74626285</p> <p><i>RAB31L1</i>, rs741887, rs2521561, rs2727258, rs2524288, rs117518711, rs74957100, rs77071864, rs78243280, rs741888, rs2524287, rs12420625, rs77229376, rs187943834, rs78156005, rs190738753, rs11230827, rs76133863, rs116985542, rs73491252</p> |
| Cormier et al. 2012                                       | <p><i>FADS</i> gene cluster rs174456, rs174627, rs482548, rs2072114, rs12807005, rs174448, rs2845573, rs7394871, rs7942717, rs74823126, rs174602, rs498793, rs7935946, rs174546, rs174570, rs174579, rs174611, rs174616, rs968567</p>                                                                                                                                                                                                                                                                                                                                        |
| Vallée Marcotte et al. Am J Clin Nutr;109:176–185 (2019)  | <p><i>IQCJ-SCHIP1</i>, rs7639707, rs62270407</p> <p><i>NXPH1</i>, rs61569932, rs1990554, rs6463808, rs6966968, rs28473103, rs28673635, rs12702829, rs78943417, rs293180, rs1837523</p> <p><i>PHF17</i>, rs1216346, rs114348423, rs75007521</p> <p><i>MYB</i>, rs72560788, rs72974149, rs210962, rs6933462</p> <p><i>NELL1</i>, rs79624996, rs1850875, rs78786240, rs117114492</p> <p><i>SLIT2</i>, rs184945470, rs143662727, rs10009109, rs10009535, rs61790364, rs73241936, rs16869663, rs76015249</p>                                                                      |
| Tremblay et al. Lipids in Health and Disease (2015) 14:12 | <p><i>PLA2G2A</i>, rs876018, rs955587, rs3753827, rs11573156, rs11573142</p> <p><i>PLA2G2C</i>, rs6426616, rs12139100, rs10916716, rs2301475, rs10916712, rs10916718</p> <p><i>PLA2G2D</i>, rs578459, rs16823482, rs3736979, rs584367, rs12045689, rs679667, rs17354769, rs1091671</p> <p><i>PLA2G2F</i>, rs12065685, rs6657574, rs11582551, rs818571, rs631134, rs11583904</p>                                                                                                                                                                                              |



|                                                                     |                                                                                                                                                                                                                                                                                                                                                                                                                                                                                                                                                                                                                                                        |
|---------------------------------------------------------------------|--------------------------------------------------------------------------------------------------------------------------------------------------------------------------------------------------------------------------------------------------------------------------------------------------------------------------------------------------------------------------------------------------------------------------------------------------------------------------------------------------------------------------------------------------------------------------------------------------------------------------------------------------------|
|                                                                     | <p><i>PLA2G4A</i>, rs979924, rs2076075, rs3736741, rs10911949, rs10752979, rs1160719, rs10737277, rs12720702, rs7522213, rs7540602, rs10157410, rs12720497, rs4651331, rs1569480, rs10911935, rs12353944, rs11576330, rs10489410, rs10911946, rs3820185, rs12746200, rs11587539</p> <p><i>PLA2G6</i>, rs5750546, rs132989, rs133016, rs2235346, rs2284060</p> <p><i>PLA2G7</i>, rs12195701, rs12528807, rs1421368, rs1421378, rs17288905, rs1805017, rs1805018, rs6929105, rs7756935</p>                                                                                                                                                               |
| <p>Ouellette et al. J Nutrigenet Nutrigenomics;6:268–280 (2013)</p> | <p><i>GPAM</i>, rs17129561, rs10787428, rs2792751</p> <p><i>AGPAT3</i>, rs999519, rs2838440, rs2838445, rs2838458, rs4818873, rs9978441, rs9982600, rs11700575, rs17004619, rs2838452, rs2838456, rs3788086, rs2838429</p> <p><i>AGPAT4</i>, rs746731, rs747866, rs1125640, rs2277092, rs2293286, rs3757025, rs3798225, rs3798920, rs3798924, rs3798929, rs3798943, rs3798945, rs3822853, rs3823058, rs4709501, rs6906489, rs6923835, rs7750302, rs7769321, rs9458172, rs10945713, rs10945719, rs11965825, rs12202278, rs17627837, rs12524665, rs1001422, rs6455711, rs9456642, rs2064721, rs3778227, rs3798922, rs11967514, rs7768457, rs12662114</p> |
| <p>Ouellette et al. Lipids in Health and Disease, 13:86 (2014)</p>  | <p><i>MGLL</i>, rs782440, rs16826716, rs6776142, rs9877819, rs555183, rs6780384, rs13076593, rs605188, rs6765071, rs782444, rs549662, rs3773155, rs541855, rs6439081, rs6439082, rs6787155, rs1466571, rs893294</p>                                                                                                                                                                                                                                                                                                                                                                                                                                    |
| <p>Bouchard-Mercier et al. Genes Nutr 9:395 (2014)</p>              | <p><i>GCK</i>, rs2268573, rs2908297, rs2971676, rs758989, rs12673242, rs2908290, rs2284777, rs2300584, rs1990458, rs741038, rs1799884, rs2908277, rs3757838</p>                                                                                                                                                                                                                                                                                                                                                                                                                                                                                        |
| <p>Bouchard-Mercier et al. Nutrients, 6, 1145-1163 (2014)</p>       | <p><i>RXRA</i>, rs10881576, rs7871655, rs12339187, rs11185660, rs11103473, rs10776909, rs12004589, rs3132301, rs1805352, rs3132294, rs1805343, rs1045570</p> <p><i>CPT1A</i>, rs3019598, rs897048, rs7942147, rs4930248, rs11228364, rs11228368, rs10896371, rs1017640, rs613084</p> <p><i>ACADVL</i>, rs2017365</p> <p><i>ACAA2</i>, rs529556, rs10502901, rs631536, rs1942421, rs2276168, rs7237253</p> <p><i>ABCD2</i>, rs4072006, rs10877201, rs12582802, rs4294600, rs11172696, rs10877173, rs7133376, rs7968837</p> <p><i>ACOX1</i>, rs10852766, rs3744033, rs12430, rs8065144,</p>                                                              |

|                                                                  |                                                                                                                                                                                                                                                                                                                                                                                                                                                                                                                                                                               |
|------------------------------------------------------------------|-------------------------------------------------------------------------------------------------------------------------------------------------------------------------------------------------------------------------------------------------------------------------------------------------------------------------------------------------------------------------------------------------------------------------------------------------------------------------------------------------------------------------------------------------------------------------------|
|                                                                  | rs11651351, rs3643, rs7213998, rs17583163<br><i>ACAA1</i> , rs2239621, rs156265, rs5875                                                                                                                                                                                                                                                                                                                                                                                                                                                                                       |
| AlSaleh et al. Genes Nutr 9:412 (2014)                           | <i>CETP</i> , rs3764261, rs247616, rs7205804<br><i>LIPC</i> , rs1532085<br><i>APOB</i> , rs1367117<br><i>ABCG5</i> , <i>ABCG8</i> , rs4299376<br><i>TIMD4</i> , <i>HAVCR1</i> , rs6882076, rs1501908, rs1553318<br>GCKR, rs1260326, rs780094<br>TRIB1, rs2954022, rs10808546, rs2954029<br><i>ANGPTL3</i> , <i>DOCK7</i> , rs3850634, rs1167998, rs2131925<br><i>FADS1</i> , <i>FADS2</i> , <i>FADS3</i> , rs174550, rs174547, rs174546, rs174583<br><i>GALNT2</i> , rs4846914, rs1321257<br><i>ABCA1</i> , rs4149268<br><i>APOE</i> , <i>APOC1</i> , <i>APOC2</i> , rs439401 |
| Vallée Marcotte et al. Genes & Nutrition 15:10 (2020)            | <i>IQCJ-SCHIP1</i> , rs7639707, rs62270407<br>NXP1, rs61569932, rs1990554, rs6463808, rs6966968, rs28473103, rs28673635, rs12702829, rs78943417, rs293180, rs1837523<br><i>PHF17</i> , rs1216346, rs114348423, rs75007521<br><i>MYB</i> , rs72560788, rs72974149, rs210962, rs6933462<br><i>NELL1</i> , rs79624996, rs1850875, rs78786240, rs117114492<br><i>SLIT2</i> , rs184945470, rs143662727, rs10009109, rs10009535, rs61790364, rs73241936, rs16869663, rs76015249                                                                                                     |
| Rudkowska et al. Journal of Lipid Research 55 (2014)             | <i>IQCJ-SCHIP1</i> , <i>MYB</i> , <i>NELL1</i> , <i>NXP1</i> , <i>PHF17</i> , <i>SLIT2</i> , rs2621308, rs1449009, rs61332355, rs2621309, rs2952724, rs2629715, rs1216352, rs1216365, rs931681, rs6920829, rs6463808, rs752088                                                                                                                                                                                                                                                                                                                                                |
| Vallée Marcotte et al. J Nutrigenet Nutrigenomics;9 :1-11 (2016) | <i>IQCJ</i> , rs12497650, rs4501157, rs13091349, rs2044704, rs1062071, rs7634829, rs2621294, rs6800211, rs17782879, rs1868414, rs2595260, rs6763890, rs9827242, rs1449009, rs2621309, rs61332355                                                                                                                                                                                                                                                                                                                                                                              |

|                                                         |                                                                                                                                                                                                                                                                                                                                                                                                                                                                                                                                                                                                                                                                                                                                                                                                                                                                                                                                                                                                                                                                                                                                                                                            |
|---------------------------------------------------------|--------------------------------------------------------------------------------------------------------------------------------------------------------------------------------------------------------------------------------------------------------------------------------------------------------------------------------------------------------------------------------------------------------------------------------------------------------------------------------------------------------------------------------------------------------------------------------------------------------------------------------------------------------------------------------------------------------------------------------------------------------------------------------------------------------------------------------------------------------------------------------------------------------------------------------------------------------------------------------------------------------------------------------------------------------------------------------------------------------------------------------------------------------------------------------------------|
|                                                         | <p><i>NXPFI</i>, rs6956210, rs2107779, rs10273195, rs12216689, rs6963644, rs17150341, rs1013868, rs12537067, rs4318981, rs17153997, rs7801099, rs4725120, rs1859275, rs10238726, rs1012960, rs11767429, rs4333500, rs7793115, rs7799856, rs7806226, rs13221144, rs17406479, rs10486228, rs17154569, rs4141002, rs7805772, rs2349780, rs2107474, rs11769942, rs6952383, rs6974252, rs10265408, rs2189904, rs2057862</p> <p><i>PHF17</i>, rs2217023, rs4975270, rs11722830, rs12505447, rs6534704, rs13148510, rs13143771, rs13142964</p> <p><i>MYB</i>, rs9321493, rs11154794, rs210798, rs210936, rs7757388, rs210962, rs17639758, rs1013891, rs2179308</p>                                                                                                                                                                                                                                                                                                                                                                                                                                                                                                                                |
| <p>Vallée Marcotte et al. Nutrients; 11, 737 (2019)</p> | <p><i>IQCJ-SCHIP1</i>, rs12497650, rs4501157, rs13091349, rs2044704, rs1962071, rs7634829, rs2621294, rs6800211, rs17782879, rs1868414, rs2595260, rs6763890, rs1449009, rs61332355, rs12485627, rs2595242, rs7639937, rs9820807, rs1375409, rs1967363, rs9824310, rs11915303, rs9835214, rs11921343, rs13066560, rs1675497, rs9839862, rs16829875, rs17795566, rs9860588, rs16830408, rs17798579, rs2364930, rs9865997, rs2595241, rs7632574, rs2621308</p> <p><i>NXPFI</i>, rs6956210, rs2107779, rs10273195, rs12216689, rs6963644, rs17150341, rs1013868, rs4318981, rs17153997, rs7801099, rs4725120, rs10238726, rs1012960, rs11767429, rs4333500, rs7793115, rs7799856, rs7806226, rs13221144, rs17406479, rs10486228, rs17154569, rs4141002, rs7805772, rs2349780, rs2107474, rs11769942, rs6952383, rs6974252, rs10265408, rs2189904, rs2057862, rs6463808</p> <p><i>PHF17</i>, rs2217023, rs4975270, rs11722830, rs12505447, rs6534704, rs13148510, rs13143771, rs13142964, rs1216352, rs1216365</p> <p><i>MYB</i>, rs9321493, rs11154794, rs210798, rs210936, rs7757388, rs17639758, rs1013891, rs2179308, rs6920829, <i>SLIT2</i>, rs2952724</p> <p><i>NELLI</i>, rs752088</p> |

Supplementary Table 6: 31-SNP Nutri-GRS

| Gene, rs Number                 | Alleles <sup>1</sup> | Associated Points |
|---------------------------------|----------------------|-------------------|
| <i>IQCJ-SCHIP1</i> , rs7639707  | <u>A</u> /G          | +1                |
| <i>IQCJ-SCHIP1</i> , rs62270407 | C/ <u>T</u>          | -1                |
| <i>NXPH1</i> , rs61569932,      | <u>G</u> /T          | +1                |
| <i>NXPH1</i> , rs1990554        | <u>A</u> /C          | +1                |
| <i>NXPH1</i> , rs6463808        | <u>A</u> /G          | +1                |
| <i>NXPH1</i> , rs6966968        | <u>A</u> /G          | +1                |
| <i>NXPH1</i> , rs28473103       | <u>A</u> /G          | -1                |
| <i>NXPH1</i> , rs28673635       | <u>A</u> /G          | +1                |
| <i>NXPH1</i> , rs12702829       | <u>C</u> /T          | +1                |
| <i>NXPH1</i> , rs78943417       | A/ <u>T</u>          | -1                |
| <i>NXPH1</i> , rs293180         | G/ <u>T</u>          | +1                |
| <i>NXPH1</i> , rs1837523        | <u>C</u> /T          | -1                |
| <i>PHF17</i> , rs1216346        | <u>C</u> /T          | +1                |
| <i>PHF17</i> , rs114348423      | <u>A</u> /G          | +1                |
| <i>PHF17</i> , rs75007521       | <u>G</u> /T          | -1                |
| <i>MYB</i> , rs72560788         | <u>C</u> /T          | -1                |
| <i>MYB</i> , rs72974149         | <u>A</u> /G          | -1                |
| <i>MYB</i> , rs210962           | <u>C</u> /T          | -1                |
| <i>MYB</i> , rs6933462          | <u>C</u> /G          | +1                |
| <i>NELL1</i> , rs79624996       | <u>A</u> /G          | +1                |
| <i>NELL1</i> , rs1850875        | <u>C</u> /T          | +1                |
| <i>NELL1</i> , rs78786240       | <u>C</u> /T          | -1                |
| <i>NELL1</i> , rs117114492      | <u>G</u> /T          | +1                |
| <i>SLIT2</i> , rs184945470      | <u>C</u> /T          | +1                |
| <i>SLIT2</i> , rs143662727      | <u>A</u> /G          | -1                |
| <i>SLIT2</i> , rs10009109       | <u>C</u> /T          | +1                |
| <i>SLIT2</i> , rs10009535       | <u>A</u> /G          | +1                |
| <i>SLIT2</i> , rs61790364       | <u>A</u> /G          | +1                |
| <i>SLIT2</i> , rs73241936       | <u>C</u> /T          | +1                |
| <i>SLIT2</i> , rs16869663       | <u>A</u> /G          | +1                |
| <i>SLIT2</i> , rs76015249       | <u>A</u> /G          | +1                |

1. Minor alleles are underlined

For individuals carrying one or two minor alleles, provide the associated number of points (either +1 or -1). For individuals homozygous for the major allele, provide 0 points. Count the overall number of points. Individuals with lower nutri-GRS are more likely to respond to approximately 3.0 g/day EPA+DHA for TG lowering.

## References

1. Bouchard-Mercier A, Godin G, Lamarche B, Pérusse L, Vohl M-C. Effects of Peroxisome Proliferator-Activated Receptors, Dietary Fat Intakes and Gene–Diet Interactions on Peak Particle Diameters of Low-Density Lipoproteins. *J Nutrigenet Nutrigenomics*. 2011;4(1):36–48.
2. Bodhini D, Gaal S, Shatwan I, Ramya K, Ellahi B, Surendran S, et al. Interaction between TCF7L2 polymorphism and dietary fat intake on high density lipoprotein cholesterol. Li S, editor. *PLoS ONE*. 2017 Nov 28;12(11):e0188382.
3. Chen Y, Estampador AC, Keller M, Poveda A, Dalla-Riva J, Johansson I, et al. The combined effects of FADS gene variation and dietary fats in obesity-related traits in a population from the far north of Sweden: the GLACIER Study. *International Journal of Obesity*. 2019 Apr;43(4):808–20.
4. Ching YK, Chin YS, Appukutty M, Ramanchadran V, Yu CY, Ang GY, et al. Interaction of Dietary Linoleic Acid and  $\alpha$ -Linolenic Acids with rs174547 in FADS1 Gene on Metabolic Syndrome Components among Vegetarians. *Nutrients*. 2019 Jul;11(7):1686.
5. Dumont J, Huybrechts I, Spinneker A, Gottrand F, Grammatikaki E, Bevilacqua N, et al. FADS1 genetic variability interacts with dietary  $\alpha$ -linolenic acid intake to affect serum non-HDL-cholesterol concentrations in European adolescents. *J Nutr*. 2011 Jul;141(7):1247–53.
6. Dumont J, Goumidi L, Grenier-Boley B, Cottel D, Marécaux N, Montaye M, et al. Dietary linoleic acid interacts with FADS1 genetic variability to modulate HDL-cholesterol and obesity-related traits. *Clinical Nutrition*. 2018 Oct 1;37(5):1683–9.
7. Fallaize R, Celis-Morales C, Macready AL, Marsaux CF, Forster H, O'Donovan C, et al. The effect of the apolipoprotein E genotype on response to personalized dietary advice intervention: findings from the Food4Me randomized controlled trial. *Am J Clin Nutr*. 2016 Sep;104(3):827–36.
8. Fontaine-Bisson B, El-Sohemy A. Genetic polymorphisms of tumor necrosis factor- $\alpha$  modify the association between dietary polyunsaturated fatty acids and plasma high-density lipoprotein-cholesterol concentrations in a population of young adults. *J Nutrigenet Nutrigenomics*. 2008;1(5):215–23.
9. Fontaine-Bisson B, Wolever TMS, Connelly PW, Corey PN, El-Sohemy A. NF- $\kappa$ B  $-94$ Ins/Del ATTG polymorphism modifies the association between dietary polyunsaturated fatty acids and HDL-cholesterol in two distinct populations. *Atherosclerosis*. 2009 Jun;204(2):465–70.
10. Hellstrand S, Sonestedt E, Ericson U, Gullberg B, Wirfält E, Hedblad B, et al. Intake levels of dietary long-chain PUFAs modify the association between genetic variation in FADS and LDL-C. *J Lipid Res*. 2012 Jun;53(6):1183–9.
11. Hosseini-Esfahani F, Mirmiran P, Koochakpoor G, Daneshpour MS, Guity K, Azizi F. Some dietary factors can modulate the effect of the zinc transporters 8 polymorphism on the risk of metabolic syndrome. *Sci Rep*. 2017 Dec;7(1):1649.

12. Jang HB, Hwang J-Y, Park JE, Oh JH, Ahn Y, Kang J-H, et al. Intake levels of dietary polyunsaturated fatty acids modify the association between the genetic variation in *PCSK5* and HDL cholesterol. *J Med Genet*. 2014 Dec;51(12):782–8.
13. Joffe YT, van der Merwe L, Carstens M, Collins M, Jennings C, Levitt NS, et al. Tumor Necrosis Factor- $\alpha$  Gene -308 G/A Polymorphism Modulates the Relationship between Dietary Fat Intake, Serum Lipids, and Obesity Risk in Black South African Women. *The Journal of Nutrition*. 2010 May 1;140(5):901–7.
14. Joffe YT, van der Merwe L, Evans J, Collins M, Lambert EV, September A, et al. The tumor necrosis factor- $\alpha$  gene -238 G>A polymorphism, dietary fat intake, obesity risk and serum lipid concentrations in black and white South African women. *Eur J Clin Nutr*. 2012 Dec;66(12):1295–302.
15. Joffe YT, van der Merwe L, Evans J, Collins M, Lambert EV, September A, et al. Interleukin-6 Gene Polymorphisms, Dietary Fat Intake, Obesity and Serum Lipid Concentrations in Black and White South African Women. *Nutrients*. 2014 Jun 24;6(6):2436–65.
16. Lai Chao-Qiang, Corella Dolores, Demissie Serkalem, Cupples L. Adrienne, Adiconis Xian, Zhu Yueping, et al. Dietary Intake of n-6 Fatty Acids Modulates Effect of Apolipoprotein A5 Gene on Plasma Fasting Triglycerides, Remnant Lipoprotein Concentrations, and Lipoprotein Particle Size. *Circulation*. 2006 May 2;113(17):2062–70.
17. Lu Y, Feskens EJ, Dollé ME, Imholz S, Verschuren WM, Müller M, et al. Dietary n-3 and n-6 polyunsaturated fatty acid intake interacts with *FADS1* genetic variation to affect total and HDL-cholesterol concentrations in the Doetinchem Cohort Study. *The American Journal of Clinical Nutrition*. 2010 Jul 1;92(1):258–65.
18. Nettleton JA, Volcik KA, Hoogeveen RC, Boerwinkle E. Carbohydrate intake modifies associations between *ANGPTL4*[E40K] genotype and HDL-cholesterol concentrations in White men from the Atherosclerosis Risk in Communities (ARIC) study. *Atherosclerosis*. 2009 Mar;203(1):214–20.
19. Richardson K, Louie-Gao Q, Arnett DK, Parnell LD, Lai C-Q, Davalos A, et al. The *PLIN4* Variant rs8887 Modulates Obesity Related Phenotypes in Humans through Creation of a Novel miR-522 Seed Site. *PLOS ONE*. 2011 Apr 20;6(4):e17944.
20. Standl M, Lattka E, Stach B, Koletzko S, Bauer C-P, von Berg A, et al. *FADS1* *FADS2* Gene Cluster, PUFA Intake and Blood Lipids in Children: Results from the GINIplus and LISAPLUS Studies. *PLoS One* [Internet]. 2012 May 21 [cited 2020 Aug 3];7(5). Available from: <https://www.ncbi.nlm.nih.gov/pmc/articles/PMC3357401/>
21. Tai ES, Corella D, Demissie S, Cupples LA, Coltell O, Schaefer EJ, et al. Polyunsaturated Fatty Acids Interact with the *PPARA*-L162V Polymorphism to Affect Plasma Triglyceride and Apolipoprotein C-III Concentrations in the Framingham Heart Study. *J Nutr*. 2005 Mar 1;135(3):397–403.
22. Volcik KA, Nettleton JA, Ballantyne CM, Boerwinkle E. Peroxisome proliferator-activated receptor alpha genetic variation interacts with n-6 and long-chain n-3 fatty acid intake to affect total cholesterol and LDL-cholesterol concentrations in the Atherosclerosis Risk in Communities Study. *Am J Clin Nutr*. 2008;87:1926–31.

- 1  
2  
3 23. Warodomwichit D, Arnett DK, Kabagambe EK, Tsai MY, Hixson JE, Straka RJ, et al. Polyunsaturated  
4 Fatty Acids Modulate the Effect of TCF7L2 Gene Variants on Postprandial Lipemia. *The Journal of*  
5 *Nutrition*. 2009 Mar 1;139(3):439–46.  
6
- 7  
8 24. AbuMweis SS, Panchal SK, Jones PJH. Triacylglycerol-Lowering Effect of Docosahexaenoic Acid Is Not  
9 Influenced by Single-Nucleotide Polymorphisms Involved in Lipid Metabolism in Humans. *Lipids*.  
10 2018;53(9):897–908.  
11
- 12 25. AlSaleh A, Maniou Z, Lewis FJ, Hall WL, Sanders TAB, O'Dell SD. Genetic predisposition scores for  
13 dyslipidaemia influence plasma lipid concentrations at baseline, but not the changes after  
14 controlled intake of n-3 polyunsaturated fatty acids. *Genes Nutr*. 2014 Jul;9(4):412.  
15
- 16 26. Armstrong P, Kelley DS, Newman JW, Stagers FE, Hartiala J, Allayee H, et al. Arachidonate 5-  
17 Lipoxygenase Gene Variants Affect Response to Fish Oil Supplementation by Healthy African  
18 Americans1234. *J Nutr*. 2012 Aug;142(8):1417–28.  
19
- 20 27. Binia A, Vargas-Martínez C, Ancira-Moreno M, Gosoni LM, Montoliu I, Gámez-Valdez E, et al.  
21 Improvement of cardiometabolic markers after fish oil intervention in young Mexican adults and  
22 the role of PPAR $\alpha$  L162V and PPAR $\gamma$ 2 P12A. *The Journal of Nutritional Biochemistry*. 2017  
23 May;43:98–106.  
24
- 25 28. Bouchard-Mercier A, Rudkowska I, Lemieux S, Couture P, Vohl M-C. Polymorphisms, de novo  
26 lipogenesis, and plasma triglyceride response following fish oil supplementation. *J Lipid Res*. 2013  
27 Oct;54(10):2866–73.  
28
- 29 29. Bouchard-Mercier A, Rudkowska I, Lemieux S, Couture P, Vohl M-C. Polymorphisms in Genes  
30 Involved in Fatty Acid  $\beta$ -Oxidation Interact with Dietary Fat Intakes to Modulate the Plasma TG  
31 Response to a Fish Oil Supplementation. *Nutrients*. 2014 Mar 18;6(3):1145–63.  
32
- 33 30. Bouchard-Mercier A, Rudkowska I, Lemieux S, Couture P, Vohl M-C. An interaction effect between  
34 glucokinase gene variation and carbohydrate intakes modulates the plasma triglyceride response  
35 to a fish oil supplementation. *Genes Nutr*. 2014 May;9(3):395.  
36
- 37 31. Caron-Dorval D, Paquet P, Paradis A-M, Rudkowska I, Lemieux S, Couture P, et al. Effect of the PPAR-  
38 Alpha L162V Polymorphism on the Cardiovascular Disease Risk Factor in Response to n–3  
39 Polyunsaturated Fatty Acids. *J Nutrigenet Nutrigenomics*. 2008;1(4):205–12.  
40
- 41 32. Carvalho-Wells AL, Jackson KG, Lockyer S, Lovegrove JA, Minihane AM. APOE genotype influences  
42 triglyceride and C-reactive protein responses to altered dietary fat intake in UK adults. *The*  
43 *American Journal of Clinical Nutrition*. 2012 Dec 1;96(6):1447–53.  
44
- 45 33. Lockyer S, Tzanetou M, Carvalho-Wells AL, Jackson KG, Minihane AM, Lovegrove JA. SATgene dietary  
46 model to implement diets of differing fat composition in prospectively genotyped groups (apoE)  
47 using commercially available foods. *British Journal of Nutrition*. 2012 Nov;108(9):1705–13.  
48
- 49 34. Caslake MJ, Miles EA, Kofler BM, Lietz G, Curtis P, Armah CK, et al. Effect of sex and genotype on  
50 cardiovascular biomarker response to fish oils: the FINGEN Study. *The American Journal of Clinical*  
51 *Nutrition*. 2008 Sep 1;88(3):618–29.  
52  
53  
54  
55  
56  
57  
58  
59

- 1
- 2
- 3
- 4 35. Cormier H, Rudkowska I, Paradis A-M, Thifault E, Garneau V, Lemieux S, et al. Association between
- 5 Polymorphisms in the Fatty Acid Desaturase Gene Cluster and the Plasma Triacylglycerol Response
- 6 to an n-3 PUFA Supplementation. *Nutrients*. 2012 Aug;4(8):1026–41.
- 7
- 8 36. Dang TM, Conway V, Plourde M. Disrupted fatty acid distribution in HDL and LDL according to
- 9 apolipoprotein E allele. *Nutrition*. 2015 Jun 1;31(6):807–12.
- 10
- 11 37. Dawczynski C, Massey KA, Ness C, Kiehntopf M, Stepanow S, Platzer M, et al. Randomized placebo-
- 12 controlled intervention with n-3 LC-PUFA-supplemented yoghurt: Effects on circulating eicosanoids
- 13 and cardiovascular risk factors. *Clinical Nutrition*. 2013 Oct 1;32(5):686–96.
- 14
- 15 38. Ferguson JF, Phillips CM, McMonagle J, Pérez-Martínez P, Shaw DI, Lovegrove JA, et al. NOS3 gene
- 16 polymorphisms are associated with risk markers of cardiovascular disease, and interact with
- 17 omega-3 polyunsaturated fatty acids. *Atherosclerosis*. 2010 Aug 1;211(2):539–44.
- 18
- 19 39. Harsløf LBS, Damsgaard CT, Hellgren LI, Andersen AD, Vogel U, Lauritzen L. Effects on metabolic
- 20 markers are modified by PPARG2 and COX2 polymorphisms in infants randomized to fish oil. *Genes*
- 21 *Nutr*. 2014 May;9(3):396.
- 22
- 23
- 24 40. Itariu BK, Zeyda M, Hochbrugger EE, Neuhofer A, Prager G, Schindler K, et al. Long-chain n–3 PUFAs
- 25 reduce adipose tissue and systemic inflammation in severely obese nondiabetic patients: a
- 26 randomized controlled trial. *The American Journal of Clinical Nutrition*. 2012 Nov 1;96(5):1137–49.
- 27
- 28 41. Jackson KG, Lockyer S, Carvalho-Wells AL, Williams CM, Minihane AM, Lovegrove JA. Dietary fat
- 29 manipulation has a greater impact on postprandial lipid metabolism than the apolipoprotein E
- 30 (epsilon) genotype—insights from the SATgene study. *Molecular Nutrition & Food Research*.
- 31 2012;56(12):1761–70.
- 32
- 33
- 34 42. Jackson KG, Lockyer S, Carvalho-Wells AL, Williams CM, Minihane AM, Lovegrove JA. Apolipoprotein
- 35 E (epsilon) genotype has a greater impact on apoB-48 than apoB-100 responses to dietary fat
- 36 manipulation—insights from the SATgene study. *Molecular Nutrition & Food Research*.
- 37 2017;61(4):1600688.
- 38
- 39 43. Lindi V, Schwab U, Louheranta A, Laakso M, Vessby B, Hermansen K, et al. Impact of the Pro12Ala
- 40 polymorphism of the PPAR- $\gamma$ 2 gene on serum triacylglycerol response to n–3 fatty acid
- 41 supplementation. *Molecular Genetics and Metabolism*. 2003 May;79(1):52–60.
- 42
- 43 44. Lindman AS, Pedersen JI, Hjerkin EM, Arnesen H, Veierød MB, Ellingsen I, et al. The effects of long-
- 44 term diet and omega-3 fatty acid supplementation on coagulation factor VII and serum
- 45 phospholipids with special emphasis on the R353Q polymorphism of the FVII gene. *Thromb*
- 46 *Haemost*. 2004 Jun;91(6):1097–104.
- 47
- 48
- 49 45. Madden J, Carrero J, Brunner A, Dastur N, Shearman C, Calder P, et al. Polymorphisms in the CD36
- 50 gene modulate the ability of fish oil supplements to lower fasting plasma triacyl glycerol and raise
- 51 HDL cholesterol concentrations in healthy middle-aged men. *Prostaglandins, Leukotrienes and*
- 52 *Essential Fatty Acids*. 2008;78:327–35.
- 53
- 54 46. Markovic O, O'Reilly G, Fussell HelenM, Turner SJ, Calder PC, Howell WM, et al. Role of single
- 55 nucleotide polymorphisms of pro-inflammatory cytokine genes in the relationship between serum
- 56
- 57
- 58
- 59
- 60



- lipids and inflammatory parameters, and the lipid-lowering effect of fish oil in healthy males. *Clinical Nutrition*. 2004 Oct 1;23(5):1084–95.
47. McColley SP, Georgopoulos A, Young LR, Kurzer MS, Redmon JB, Raatz SK. A high-fat diet and the threonine-encoding allele (Thr54) polymorphism of fatty acid-binding protein 2 reduce plasma triglyceride-rich lipoproteins. *Nutrition Research*. 2011 Jul 1;31(7):503–8.
48. Minihane Anne M., Khan Syrah, Leigh-Firbank Elizabeth C., Talmud Philippa, Wright John W., Murphy Margaret C., et al. ApoE Polymorphism and Fish Oil Supplementation in Subjects With an Atherogenic Lipoprotein Phenotype. *Arteriosclerosis, Thrombosis, and Vascular Biology*. 2000 Aug 1;20(8):1990–7.
49. Olano-Martin E, Anil E, Caslake MJ, Packard CJ, Bedford D, Stewart G, et al. Contribution of apolipoprotein E genotype and docosahexaenoic acid to the LDL-cholesterol response to fish oil. *Atherosclerosis*. 2010 Mar;209(1):104–10.
50. Ouellette C, Cormier H, Rudkowska I, Guénard F, Lemieux S, Couture P, et al. Polymorphisms in Genes Involved in the Triglyceride Synthesis Pathway and Marine Omega-3 Polyunsaturated Fatty Acid Supplementation Modulate Plasma Triglyceride Levels. *LFG*. 2013;6(4–5):268–80.
51. Ouellette C, Rudkowska I, Lemieux S, Lamarche B, Couture P, Vohl M-C. Gene-diet interactions with polymorphisms of the MGLL gene on plasma low-density lipoprotein cholesterol and size following an omega-3 polyunsaturated fatty acid supplementation: a clinical trial. *Lipids Health Dis*. 2014 May 24;13:86.
52. Paschos GK, Yiannakouris N, Rallidis LS, Davies I, Griffin BA, Panagiotakos DB, et al. Apolipoprotein E Genotype in Dyslipidemic Patients and Response of Blood Lipids and Inflammatory Markers to Alpha-Linolenic Acid. *Angiology*. 2005 Jan 1;56(1):49–60.
53. Pishva H, Mahboob S-A, Mehdipour P, Eshraghian MR, Mohammadi-Asl J, Hosseini S, et al. Fatty acid-binding protein-2 genotype influences lipid and lipoprotein response to eicosapentaenoic acid supplementation in hypertriglyceridemic subjects. *Nutrition*. 2010 Nov 1;26(11):1117–21.
54. Pishva H, Mehdipour P, Eshraghian MR, Mahboob S-A. Effects of Eicosapentaenoic Acid Supplementation on Lipid and Lipoprotein Profile in Hypertriglyceridemic Subjects with Different Proliferator-activated Receptor Alpha Genotypes. *Int J Prev Med*. 2014 Mar;5(3):333–40.
55. Roke K, Mutch DM. The Role of FADS1/2 Polymorphisms on Cardiometabolic Markers and Fatty Acid Profiles in Young Adults Consuming Fish Oil Supplements. *Nutrients*. 2014 Jun 16;6(6):2290–304.
56. Rudkowska I, Julien P, Couture P, Lemieux S, Tchernof A, Barbier O, et al. Cardiometabolic risk factors are influenced by Stearoyl-CoA Desaturase (SCD) –1 gene polymorphisms and n-3 polyunsaturated fatty acid supplementation. *Molecular Nutrition & Food Research*. 2014;58(5):1079–86.
57. Rudkowska I, Guénard F, Julien P, Couture P, Lemieux S, Barbier O, et al. Genome-wide association study of the plasma triglyceride response to an n-3 polyunsaturated fatty acid supplementation. *J Lipid Res*. 2014 Jul;55(7):1245–53.

- 1  
2  
3  
4  
5  
6  
7  
8  
9  
10  
11  
12  
13  
14  
15  
16  
17  
18  
19  
20  
21  
22  
23  
24  
25  
26  
27  
28  
29  
30  
31  
32  
33  
34  
35  
36  
37  
38  
39  
40  
41  
42  
43  
44  
45  
46  
47  
48  
49  
50  
51  
52  
53  
54  
55  
56  
57  
58  
59  
60
58. Scorletti E, West AL, Bhatia L, Hoile SP, McCormick KG, Burdge GC, et al. Treating liver fat and serum triglyceride levels in NAFLD, effects of PNPLA3 and TM6SF2 genotypes: Results from the WELCOME trial. *Journal of Hepatology*. 2015 Dec 1;63(6):1476–83.
  59. Thifault E, Cormier H, Bouchard-Mercier A, Rudkowska I, Paradis A-M, Garneau V, et al. Effects of Age, Sex, Body Mass Index and APOE Genotype on Cardiovascular Biomarker Response to an n-3 Polyunsaturated Fatty Acid Supplementation. *LFG*. 2013;6(2):73–82.
  60. Tremblay BL, Cormier H, Rudkowska I, Lemieux S, Couture P, Vohl M-C. Association between polymorphisms in phospholipase A2 genes and the plasma triglyceride response to an n-3 PUFA supplementation: a clinical trial. *Lipids in Health and Disease*. 2015 Feb 21;14(1):12.
  61. Bastien Vallée Marcotte, Cormier H, Guénard F, Rudkowska I, Lemieux S, Couture P, et al. Novel Genetic Loci Associated with the Plasma Triglyceride Response to an Omega-3 Fatty Acid Supplementation. *J Nutigenet Nutrigenomics*. 2016;9:1–11.
  62. Vallée Marcotte B, Guénard F, Marquis J, Charpagne A, Vadillo-Ortega F, Tejero ME, et al. Genetic Risk Score Predictive of the Plasma Triglyceride Response to an Omega-3 Fatty Acid Supplementation in a Mexican Population. *Nutrients* [Internet]. 2019 Mar 29 [cited 2020 Aug 3];11(4). Available from: <https://www.ncbi.nlm.nih.gov/pmc/articles/PMC6521301/>
  63. Vallée Marcotte B, Guénard F, Lemieux S, Couture P, Rudkowska I, Calder PC, et al. Fine mapping of genome-wide association study signals to identify genetic markers of the plasma triglyceride response to an omega-3 fatty acid supplementation.
  64. Vallée Marcotte B, Allaire J, Guénard F, de Toro-Martín J, Couture P, Lamarche B, et al. Genetic risk prediction of the plasma triglyceride response to independent supplementations with eicosapentaenoic and docosahexaenoic acids: the ComparED Study. *Genes Nutr*. 2020 Dec;15(1):10.
  65. Wu S-Y, Mayneris-Perxachs J, Lovegrove JA, Todd S, Yaqoob P. Fish-oil supplementation alters numbers of circulating endothelial progenitor cells and microparticles independently of eNOS genotype. *The American Journal of Clinical Nutrition*. 2014 Nov 1;100(5):1232–43.
  66. Zheng J-S, Chen J, Wang L, Yang H, Fang L, Yu Y, et al. Replication of a Gene-Diet Interaction at CD36, NOS3 and PPARG in Response to Omega-3 Fatty Acid Supplements on Blood Lipids: A Double-Blind Randomized Controlled Trial. *EBioMedicine*. 2018 Apr 17;31:150–6.
  67. Vallée Marcotte B, Guénard F, Lemieux S, Couture P, Rudkowska I, Calder PC, et al. Fine mapping of genome-wide association study signals to identify genetic markers of the plasma triglyceride response to an omega-3 fatty acid supplementation. *The American Journal of Clinical Nutrition*. 2019 Jan 1;109(1):176–85.



# PRISMA 2009 Checklist

| Section/topic                      | #  | Checklist item                                                                                                                                                                                                                                                                                              | Reported on page # |
|------------------------------------|----|-------------------------------------------------------------------------------------------------------------------------------------------------------------------------------------------------------------------------------------------------------------------------------------------------------------|--------------------|
| <b>TITLE</b>                       |    |                                                                                                                                                                                                                                                                                                             |                    |
| Title                              | 1  | Identify the report as a systematic review, meta-analysis, or both.                                                                                                                                                                                                                                         | 1                  |
| <b>ABSTRACT</b>                    |    |                                                                                                                                                                                                                                                                                                             |                    |
| Structured summary                 | 2  | Provide a structured summary including, as applicable: background; objectives; data sources; study eligibility criteria, participants, and interventions; study appraisal and synthesis methods; results; limitations; conclusions and implications of key findings; systematic review registration number. | 2                  |
| <b>INTRODUCTION</b>                |    |                                                                                                                                                                                                                                                                                                             |                    |
| Rationale                          | 3  | Describe the rationale for the review in the context of what is already known.                                                                                                                                                                                                                              | 3-5                |
| Objectives                         | 4  | Provide an explicit statement of questions being addressed with reference to participants, interventions, comparisons, outcomes, and study design (PICOS).                                                                                                                                                  | 5-6                |
| <b>METHODS</b>                     |    |                                                                                                                                                                                                                                                                                                             |                    |
| Protocol and registration          | 5  | Indicate if a review protocol exists, if and where it can be accessed (e.g., Web address), and, if available, provide registration information including registration number.                                                                                                                               | 5                  |
| Eligibility criteria               | 6  | Specify study characteristics (e.g., PICOS, length of follow-up) and report characteristics (e.g., years considered, language, publication status) used as criteria for eligibility, giving rationale.                                                                                                      | 5-6                |
| Information sources                | 7  | Describe all information sources (e.g., databases with dates of coverage, contact with study authors to identify additional studies) in the search and date last searched.                                                                                                                                  | 5, 7               |
| Search                             | 8  | Present full electronic search strategy for at least one database, including any limits used, such that it could be repeated.                                                                                                                                                                               | Suppl. T1          |
| Study selection                    | 9  | State the process for selecting studies (i.e., screening, eligibility, included in systematic review, and, if applicable, included in the meta-analysis).                                                                                                                                                   | 6-7                |
| Data collection process            | 10 | Describe method of data extraction from reports (e.g., piloted forms, independently, in duplicate) and any processes for obtaining and confirming data from investigators.                                                                                                                                  | 6-7                |
| Data items                         | 11 | List and define all variables for which data were sought (e.g., PICOS, funding sources) and any assumptions and simplifications made.                                                                                                                                                                       | 5-7                |
| Risk of bias in individual studies | 12 | Describe methods used for assessing risk of bias of individual studies (including specification of whether this was done at the study or outcome level), and how this information is to be used in any data synthesis.                                                                                      | 8-9                |
| Summary measures                   | 13 | State the principal summary measures (e.g., risk ratio, difference in means).                                                                                                                                                                                                                               | 9                  |



# PRISMA 2009 Checklist

|                      |    |                                                                                                                                                           |                                    |
|----------------------|----|-----------------------------------------------------------------------------------------------------------------------------------------------------------|------------------------------------|
| Synthesis of results | 14 | Describe the methods of handling data and combining results of studies, if done, including measures of consistency (e.g., $I^2$ ) for each meta-analysis. | NA (meta-analysis not appropriate) |
|----------------------|----|-----------------------------------------------------------------------------------------------------------------------------------------------------------|------------------------------------|

Page 1 of 2

| Section/topic                 | #  | Checklist item                                                                                                                                                                                           | Reported on page # |
|-------------------------------|----|----------------------------------------------------------------------------------------------------------------------------------------------------------------------------------------------------------|--------------------|
| Risk of bias across studies   | 15 | Specify any assessment of risk of bias that may affect the cumulative evidence (e.g., publication bias, selective reporting within studies).                                                             | Table 4            |
| Additional analyses           | 16 | Describe methods of additional analyses (e.g., sensitivity or subgroup analyses, meta-regression), if done, indicating which were pre-specified.                                                         | 11-12              |
| <b>RESULTS</b>                |    |                                                                                                                                                                                                          |                    |
| Study selection               | 17 | Give numbers of studies screened, assessed for eligibility, and included in the review, with reasons for exclusions at each stage, ideally with a flow diagram.                                          | Figure 1           |
| Study characteristics         | 18 | For each study, present characteristics for which data were extracted (e.g., study size, PICOS, follow-up period) and provide the citations.                                                             | Tables 1 and 2     |
| Risk of bias within studies   | 19 | Present data on risk of bias of each study and, if available, any outcome level assessment (see item 12).                                                                                                | Table 4            |
| Results of individual studies | 20 | For all outcomes considered (benefits or harms), present, for each study: (a) simple summary data for each intervention group (b) effect estimates and confidence intervals, ideally with a forest plot. | Tables 1 and 2     |
| Synthesis of results          | 21 | Present results of each meta-analysis done, including confidence intervals and measures of consistency.                                                                                                  | NA                 |
| Risk of bias across studies   | 22 | Present results of any assessment of risk of bias across studies (see Item 15).                                                                                                                          | Table 4            |
| Additional analysis           | 23 | Give results of additional analyses, if done (e.g., sensitivity or subgroup analyses, meta-regression [see Item 16]).                                                                                    | 11-12, Table 3     |
| <b>DISCUSSION</b>             |    |                                                                                                                                                                                                          |                    |
| Summary of evidence           | 24 | Summarize the main findings including the strength of evidence for each main outcome; consider their relevance to key groups (e.g., healthcare providers, users, and policy makers).                     | Table 3, 34-39     |
| Limitations                   | 25 | Discuss limitations at study and outcome level (e.g., risk of bias), and at review-level (e.g., incomplete retrieval of identified research, reporting bias).                                            | 45-46              |
| Conclusions                   | 26 | Provide a general interpretation of the results in the context of other evidence, and implications for future research.                                                                                  | 40-47              |
| <b>FUNDING</b>                |    |                                                                                                                                                                                                          |                    |

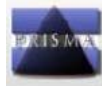

# PRISMA 2009 Checklist

|         |    |                                                                                                                                            |    |
|---------|----|--------------------------------------------------------------------------------------------------------------------------------------------|----|
| Funding | 27 | Describe sources of funding for the systematic review and other support (e.g., supply of data); role of funders for the systematic review. | 47 |
|---------|----|--------------------------------------------------------------------------------------------------------------------------------------------|----|

From: Moher D, Liberati A, Tetzlaff J, Altman DG, The PRISMA Group (2009). Preferred Reporting Items for Systematic Reviews and Meta-Analyses: The PRISMA Statement. PLoS Med 6(7): e1000097. doi:10.1371/journal.pmed1000097  
For more information, visit: [www.prisma-statement.org](http://www.prisma-statement.org).

Page 2 of 2

For peer review only

# BMJ Open

## A systematic review of nutrigenetics, omega-3 and plasma lipids/lipoproteins/apolipoproteins with evidence evaluation using the GRADE approach

|                                 |                                                                                                                                                                                                                                                                                                                                                                                                                                                                                                                                                                                                                                                                                                                                                                                                                                                                                                                                                                                                                                                                                                                                                                                                                                                                                       |
|---------------------------------|---------------------------------------------------------------------------------------------------------------------------------------------------------------------------------------------------------------------------------------------------------------------------------------------------------------------------------------------------------------------------------------------------------------------------------------------------------------------------------------------------------------------------------------------------------------------------------------------------------------------------------------------------------------------------------------------------------------------------------------------------------------------------------------------------------------------------------------------------------------------------------------------------------------------------------------------------------------------------------------------------------------------------------------------------------------------------------------------------------------------------------------------------------------------------------------------------------------------------------------------------------------------------------------|
| Journal:                        | <i>BMJ Open</i>                                                                                                                                                                                                                                                                                                                                                                                                                                                                                                                                                                                                                                                                                                                                                                                                                                                                                                                                                                                                                                                                                                                                                                                                                                                                       |
| Manuscript ID                   | bmjopen-2021-054417.R2                                                                                                                                                                                                                                                                                                                                                                                                                                                                                                                                                                                                                                                                                                                                                                                                                                                                                                                                                                                                                                                                                                                                                                                                                                                                |
| Article Type:                   | Original research                                                                                                                                                                                                                                                                                                                                                                                                                                                                                                                                                                                                                                                                                                                                                                                                                                                                                                                                                                                                                                                                                                                                                                                                                                                                     |
| Date Submitted by the Author:   | 06-Dec-2021                                                                                                                                                                                                                                                                                                                                                                                                                                                                                                                                                                                                                                                                                                                                                                                                                                                                                                                                                                                                                                                                                                                                                                                                                                                                           |
| Complete List of Authors:       | Keathley, Justine; Université Laval, Centre Nutrition, Santé et Société (NUTRISS), Institut sur la Nutrition et les Aliments Fonctionnels (INAF) Quebec, QC, CAN; Université Laval, School of Nutrition Quebec, QC, CAN<br>Garneau, Véronique; Université Laval, Centre Nutrition, Santé et Société (NUTRISS), Institut sur la Nutrition et les Aliments Fonctionnels (INAF); Université Laval, School of Nutrition<br>Marcil, Valérie ; University of Montreal, Department of Nutrition; Sainte-Justine University Health Centre, Research Centre<br>Mutch, David; University of Guelph, Department of Human Health and Nutritional Sciences<br>Robitaille, Julie; Laval University, Centre Nutrition, Santé et Société (NUTRISS), Institut sur la Nutrition et les Aliments Fonctionnels (INAF); Laval University, School of Nutrition<br>Rudkowska, Iwona; Université Laval, Department of Kinesiology; Centre de recherche du CHU de Québec-Université Laval, Endocrinology and Nephrology Unit<br>Sofian, Gabriela; Université Laval, Library<br>Desroches, Sophie; Université Laval<br>Vohl, Marie-Claude; Université Laval, Centre Nutrition, Santé et Société (NUTRISS), Institut sur la Nutrition et les Aliments Fonctionnels (INAF); Université Laval, School of Nutrition |
| <b>Primary Subject Heading</b>: | Nutrition and metabolism                                                                                                                                                                                                                                                                                                                                                                                                                                                                                                                                                                                                                                                                                                                                                                                                                                                                                                                                                                                                                                                                                                                                                                                                                                                              |
| Secondary Subject Heading:      | Cardiovascular medicine, Genetics and genomics, Nutrition and metabolism                                                                                                                                                                                                                                                                                                                                                                                                                                                                                                                                                                                                                                                                                                                                                                                                                                                                                                                                                                                                                                                                                                                                                                                                              |
| Keywords:                       | NUTRITION & DIETETICS, GENETICS, Lipid disorders < DIABETES & ENDOCRINOLOGY                                                                                                                                                                                                                                                                                                                                                                                                                                                                                                                                                                                                                                                                                                                                                                                                                                                                                                                                                                                                                                                                                                                                                                                                           |
|                                 |                                                                                                                                                                                                                                                                                                                                                                                                                                                                                                                                                                                                                                                                                                                                                                                                                                                                                                                                                                                                                                                                                                                                                                                                                                                                                       |

SCHOLARONE™  
Manuscripts



I, the Submitting Author has the right to grant and does grant on behalf of all authors of the Work (as defined in the below author licence), an exclusive licence and/or a non-exclusive licence for contributions from authors who are: i) UK Crown employees; ii) where BMJ has agreed a CC-BY licence shall apply, and/or iii) in accordance with the terms applicable for US Federal Government officers or employees acting as part of their official duties; on a worldwide, perpetual, irrevocable, royalty-free basis to BMJ Publishing Group Ltd ("BMJ") its licensees and where the relevant Journal is co-owned by BMJ to the co-owners of the Journal, to publish the Work in this journal and any other BMJ products and to exploit all rights, as set out in our [licence](#).

The Submitting Author accepts and understands that any supply made under these terms is made by BMJ to the Submitting Author unless you are acting as an employee on behalf of your employer or a postgraduate student of an affiliated institution which is paying any applicable article publishing charge ("APC") for Open Access articles. Where the Submitting Author wishes to make the Work available on an Open Access basis (and intends to pay the relevant APC), the terms of reuse of such Open Access shall be governed by a Creative Commons licence – details of these licences and which [Creative Commons](#) licence will apply to this Work are set out in our licence referred to above.

Other than as permitted in any relevant BMJ Author's Self Archiving Policies, I confirm this Work has not been accepted for publication elsewhere, is not being considered for publication elsewhere and does not duplicate material already published. I confirm all authors consent to publication of this Work and authorise the granting of this licence.

1 ***A systematic review of nutrigenetics, omega-3 and plasma***  
2 ***lipids/lipoproteins/apolipoproteins with evidence evaluation using the***  
3 ***GRADE approach***

4 Justine Keathley, PhD, RD<sup>1,2</sup>; Véronique Garneau, MSc, RD<sup>1</sup>; Valérie Marcil<sup>3,4</sup>, PhD, David M  
5 Mutch, PhD<sup>5</sup>, Julie Robitaille, PhD, RD<sup>1,2</sup>, Iwona Rudkowska, PhD, RD<sup>6,7</sup>, Gabriela Sofian,  
6 MSI<sup>8</sup>, Sophie Desroches, PhD, RD<sup>1,2</sup>; **Marie-Claude Vohl, PhD<sup>1,2</sup>\*\***

7 <sup>1</sup> Centre Nutrition, Santé et Société (NUTRISS), Institut sur la Nutrition et les Aliments  
8 Fonctionnels (INAF), Université Laval, Québec City, Québec, G1V 0A6, Canada

9 <sup>2</sup> School of Nutrition, Université Laval, Québec City, Québec, G1V 0A6, Canada

10 <sup>3</sup> Research Centre, Sainte-Justine University Health Centre, Montréal, Québec, H3T 1C5, Canada

11 <sup>4</sup> Department of Nutrition, Université de Montréal, Montréal, Québec, H3T 1J4, Canada

12 <sup>5</sup> Department of Human Health and Nutritional Sciences, University of Guelph, Guelph, Ontario,  
13 N1G 2W1, Canada

14 <sup>6</sup> Endocrinology and Nephrology Unit, CHU de Québec-Université Laval Research Center, Québec  
15 City, Québec, G1V 0A6, Canada

16 <sup>7</sup> Department of Kinesiology, Université Laval, Québec City, Québec, G1V 0A6, Canada

17 <sup>8</sup> Library, Université Laval, Québec City, Québec, G1V 0A6, Canada

18 **\*\*Corresponding Author: marie-claude.vohl@fsaa.ulaval.ca; Tel.: +1-418-656-2131 (ext.**  
19 **404676)**

20 **Ethics Approval Statement:** No ethics approval was required for a systematic review.

21 **Running Head:** Nutrigenetics, omega-3 and lipids/lipoproteins

22 Data described in the manuscript will be made available upon request pending approval  
23 from the corresponding author.

24 **Abbreviations:** ALA (alpha-linolenic acid); CV (coefficient of variation); DHA  
25 (docosahexaenoic acid); EPA (eicosapentaenoic acid); FDA (Food and Drug  
26 Administration); GRADE (Grading of Recommendations Assessment, Development and  
27 Evaluation); HCP (healthcare professional); LD (linkage disequilibrium); nutri-GRS  
28 (nutrigenetic risk score); SNP (single nucleotide polymorphism)



## 29 ABSTRACT

30 **Objectives:** Despite the uptake of nutrigenetic testing through direct-to-consumer  
31 services and healthcare professionals, systematic reviews determining scientific validity  
32 are limited in this field. The objective of this review was to: retrieve, synthesize and  
33 assess the quality of evidence (confidence) for nutrigenetic approaches related to the  
34 effect of genetic variation on plasma lipid, lipo- and apolipoprotein responsiveness to  
35 omega-3 fatty acid intake.

36 **Design:** A systematic review was conducted using three search engines (Embase, Web of  
37 Science and Medline) for articles published up until August 1, 2020. We aimed to  
38 systematically search, identify (select), and provide a narrative synthesis of all studies  
39 that assessed nutrigenetic associations/interactions for genetic variants (comparators)  
40 influencing the plasma lipid, lipoprotein and/or apolipoprotein response (outcomes) to  
41 omega-3 fatty acid intake (intervention/exposure) in humans – both pediatric and adult  
42 populations (population). We further aimed to assess the overall quality of evidence for  
43 specific priority nutrigenetic associations/interactions based on the following inclusion  
44 criteria: nutrigenetic associations/interactions reported for the same genetic variants  
45 (comparators) influencing the same plasma lipid, lipoprotein and/or apolipoprotein  
46 response (outcomes) to omega-3 fatty acid intake (intervention/exposure) in humans –  
47 both pediatric and adult populations (population) in two independent studies, irrespective  
48 of the findings. Risk of bias was assessed in individual studies. Evidence was evaluated  
49 using the GRADE approach. This systematic review was registered with PROSPERO  
50 (CRD42020185087).

51 **Results:** Out of 1830 articles screened, 65 met the inclusion criteria for the narrative  
52 synthesis ( $n=23$  observational,  $n=42$  interventional); of these, 25 met the inclusion  
53 criteria for evidence evaluation using GRADE. Overall, current evidence is insufficient  
54 for gene-diet associations related to omega-3 fatty acid intake on plasma apolipoproteins,  
55 total cholesterol, HDL-cholesterol, LDL-cholesterol and LDL particle size. However,  
56 there is strong (GRADE rating: moderate quality) evidence to suggest that male *APOE*-  
57 E4 carriers (rs429358, rs7412) exhibit significant triglyceride reductions in response to  
58 omega-3-rich fish oil with a dose-response effect. Moreover, strong (GRADE rating: high  
59 quality) evidence suggests that a 31-SNP nutrigenetic risk score can predict plasma  
60 triglyceride responsiveness to omega-3-rich fish oil in adults with overweight/obesity  
61 from various ethnicities.

62 **Conclusions:** Most evidence in this area is weak, but two specific nutrigenetic  
63 interactions exhibited strong evidence, with limited generalizability to specific  
64 populations.

65 **Keywords:** nutrigenomics, nutrigenetics, nutritional genomics, genetic risk score,  
66 nutrigenetic risk score, triglycerides, lipids, lipoproteins, omega-3 fatty acid, *APOE*

## 67 STRENGTHS AND LIMITATIONS

68 - Strength: Comprehensive systematic review guided by PRISMA

- 1  
2  
3 69 - Strength: Critical appraisal of the evidence guided by GRADE  
4 70 - Limitation: Inability to conduct a meta-analysis given the comprehensive  
5 71 overview of studies and thus heterogeneity  
6 72 - Limitation: Several included studies without replication; most evidence was low  
7 73 or very low quality according to GRADE  
8  
9  
10  
11  
12  
13  
14  
15  
16  
17  
18  
19  
20  
21  
22  
23  
24  
25  
26  
27  
28  
29  
30  
31  
32  
33  
34  
35  
36  
37  
38  
39  
40  
41  
42  
43  
44  
45  
46  
47  
48  
49  
50  
51  
52  
53  
54  
55  
56  
57  
58  
59  
60

## 74 INTRODUCTION

75  
76 Cardiometabolic disease is a health concern worldwide (1). Nutrigenetic research  
77 demonstrates that there is significant inter-individual variability in cardiometabolic risk  
78 factor levels, in part based on a combination of genetic and nutrition-related risk factors  
79 (2,3). For example, protein intake has consistently been shown to influence measures of  
80 body weight and composition dependent on *FTO* genotype (rs9939609 or loci in strong  
81 linkage disequilibrium) (4,5). Consumers indicate great interest in personalized nutrition  
82 based on genetics (6,7), however, a lack of industry oversight (8,9) has led to highly  
83 variable scientific validity of nutrigenetic tests available to consumers. While recognizing  
84 that some groups question whether genetic testing for personalized nutrition is ready for  
85 ‘prime time’, Gorman and colleagues suggested that there are certain specific nutrigenetic  
86 interactions with strong evidence that could be considered for implementation into  
87 clinical practice by expert committees who are responsible for creating dietary guidelines  
88 (10). With this in mind, systematic reviews that include an evaluation of levels of  
89 evidence are urgently needed in order to determine if there are any nutrigenetic  
90 associations that may warrant potential implementation into practice.

91 The dominant omega-3 polyunsaturated fatty acids are eicosapentaenoic acid (EPA) and  
92 docosahexaenoic acid (DHA), which typically come from marine sources (e.g. fish oil),  
93 and alpha-linolenic acid (ALA), which are rich in plant sources (e.g., canola oil) (11,12).  
94 It is well established that higher intakes of omega-3 fatty acids from foods or  
95 supplements (herein after referred to collectively as “omega-3s”), particularly from long-  
96 chain EPA and DHA, tend to improve indicators of cardiometabolic health (12,13). In

1  
2  
3 97 terms of their lipid and lipoprotein lowering effects, omega-3s have consistently  
4  
5 98 demonstrated an impact on triglycerides (TG) (14). High-quality evidence from  
6  
7 99 population-based studies suggests that long-chain omega-3s (EPA and DHA) reduce  
8  
9  
10 100 plasma TG by about 15% (14). There is also high-quality evidence suggesting that EPA  
11  
12 101 and DHA can raise high-density lipoprotein (HDL) cholesterol (14). Other studies have  
13  
14 102 further demonstrated a relationship between omega-3 and HDL-cholesterol (15), low-  
15  
16 103 density lipoprotein (LDL)-cholesterol (15), total cholesterol (16–18), apolipoproteins  
17  
18 104 (19), and LDL particle size (20). Despite several studies with significant findings for  
19  
20 105 these outcomes, when reviewing the evidence, studies have demonstrated conflicting  
21  
22 106 results for the impact of omega-3 on many lipid profile outcomes (14). Genetic variation  
23  
24 107 could explain this heterogeneity. EPA and DHA have been shown to significantly impact  
25  
26 108 the expression of thousands of genes including those involved in inflammatory and  
27  
28 109 atherogenic pathways (21,22). Evidence now demonstrates that the health impacts of  
29  
30 110 omega-3 intake could differ based on genetic variation (23,24). Despite the potential for  
31  
32 111 omega-3s to have a significant positive impact on health outcomes, population intakes of  
33  
34 112 omega-3s tend to be low (25). While the World Health Organization's Adequate Intake  
35  
36 113 level for adults is 200-250 mg EPA+DHA daily (26,27), the mean reported intake of  
37  
38 114 EPA+DHA in the United States is only approximately 100 mg daily (25). Nutrigenetic  
39  
40 115 interventions have the potential to motivate improvements in dietary intake beyond  
41  
42 116 population-based interventions (28). Additionally, evidence suggests that genetic  
43  
44 117 variability affects health responses to omega-3s (23). Thus, critically appraising and  
45  
46 118 grading the evidence for nutrigenetic interactions related to omega-3s and plasma lipids,  
47  
48 119 lipoproteins and apolipoproteins is an important research priority. The most recent  
49  
50  
51  
52  
53  
54  
55  
56  
57  
58  
59  
60

1  
2  
3 120 systematic review on nutrigenetic interactions related to omega-3s and intermediate  
4  
5 121 phenotypes of cardiovascular disease was conducted nearly a decade ago, and this study  
6  
7 122 did not evaluate the quality of evidence using an established methodology (29).  
8  
9  
10 123 Therefore, we aimed to provide a comprehensive summary of current evidence related to  
11  
12 124 inter-individual variability in plasma lipid, lipoprotein and apolipoprotein responses to  
13  
14 125 omega-3 intake (plant and marine sources) based on genetic variations. Overall, the  
15  
16 126 specific objectives of this study were as follows:

17  
18  
19  
20 127 **Objective 1.** Systematically search, identify (select), and provide a narrative  
21  
22 128 synthesis of all studies that assessed nutrigenetic associations/interactions for genetic  
23  
24 129 variants (comparators; i.e. outcomes in those with a specific genotype for a genetic  
25  
26 130 variant compared to a different genotype) influencing the plasma lipid, lipoprotein  
27  
28 131 and/or apolipoprotein response (outcomes) to omega-3 fatty acid intake  
29  
30 132 (intervention/exposure) in humans – both pediatric and adult populations  
31  
32 133 (population).

33  
34  
35  
36  
37 134 **Objective 2.** Assess the overall quality of evidence for specific priority nutrigenetic  
38  
39 135 associations/interactions based on the following inclusion criteria: nutrigenetic  
40  
41 136 associations/interactions reported for the same genetic variants (comparators)  
42  
43 137 influencing the same plasma lipid, lipoprotein and/or apolipoprotein response  
44  
45 138 (outcomes) to omega-3 fatty acid intake (intervention/exposure) in humans – both  
46  
47 139 pediatric and adult populations (population) in two independent studies, irrespective  
48  
49 140 of the findings.  
50

51  
52  
53  
54 141  
55  
56  
57  
58  
59  
60

1  
2  
3 **142 Methods**

4 143  
5 144 **Patient and Public Involvement:** No patient involvement.

6  
7  
8 145 *Literature Search*

9  
10  
11 146 The systematic review protocol was registered with PROSPERO (CRD42020185087).

12  
13 147 The review process was guided by previously established methods, including a  
14  
15 previously outlined five-step systematic review process (30,31). The search engines  
16 148 Embase, Web of Science and Medline OVID were used to conduct the search starting in  
17  
18 149 May 2020 and screen for articles meeting inclusion criteria, using the comprehensive  
19  
20 150 search terms outlined in Supplementary Table 1, properly combined by Boolean  
21  
22 151 operators. The literature was searched up until August 1, 2020 (there was no minimum  
23  
24 152 start date; any article published prior to this date was included in the search). A PRISMA  
25  
26 153 diagram (Figure 1) guided the article screening process (32).  
27  
28  
29

30  
31  
32  
33 155 *Inclusion and Exclusion Criteria*

34  
35  
36 156 Original studies were included if they were written in English or French. Inclusion  
37  
38 157 criteria were developed using the Population, Intervention, Comparison, Outcomes,  
39  
40 158 (PICO) and Population, Exposure, Comparison, Outcomes (PECO) methods (33,34) for  
41  
42 159 interventional and observational research, respectively. These are detailed in Table 1 for  
43  
44 160 each study objective.  
45  
46  
47  
48

49 161 **Table 1. PICO/PECO for Study Objectives**

| PICO/PECO for Objective 1: |                                                                               |
|----------------------------|-------------------------------------------------------------------------------|
| Population                 | Human studies (adult and pediatric)                                           |
| Intervention/<br>Exposure  | Omega-3s (total omega-3 or various types; supplemental and/or dietary intake) |

|                                    |                                                                                                                                                                                  |
|------------------------------------|----------------------------------------------------------------------------------------------------------------------------------------------------------------------------------|
| Comparison                         | Genetic variation                                                                                                                                                                |
| Outcomes                           | HDL-cholesterol, LDL-cholesterol, LDL particle size, total cholesterol, apolipoproteins, and/or TG                                                                               |
| <b>PICO/PECO for Objective 2*:</b> |                                                                                                                                                                                  |
| Population                         | Human studies (adult and pediatric)                                                                                                                                              |
| Intervention/<br>Exposure          | Omega-3s (total omega-3 or various types; supplemental and/or dietary intake)                                                                                                    |
| Comparison                         | Genetic variation in the same genetic location [gene(s) and SNP(s)]                                                                                                              |
| Outcomes                           | The same outcome of interest among studies with the same genetic comparators: HDL-cholesterol, LDL-cholesterol, LDL particle size, total cholesterol, apolipoproteins, and/or TG |

162 \*Nutrigenetic associations/interactions were included in objective 2, **in the evidence grading**  
 163 **process**, irrespective of the findings, provided that they had been reported in at least two  
 164 independent studies on the same gene(s) and SNP(s), and the same plasma outcome.

165 There were no limitations to the population characteristics (all populations/patient  
 166 samples were included). Animal studies were excluded. Dietary interventions and  
 167 observational studies involving omega-3s (total omega-3 or various types; supplemental  
 168 and/or dietary intake) and comparing lipid and/or lipoprotein and/or apolipoprotein  
 169 outcomes between different genetic variations based on omega-3 dietary or supplemental  
 170 intake (and not blood fatty acid levels; e.g. EPA and DHA in red blood cells) were  
 171 included in the narrative synthesis. In included studies, samples had to be stratified on the  
 172 basis of genetic variation. Specific lipid and lipoprotein outcomes of interest were: HDL-  
 173 cholesterol, LDL-cholesterol, LDL particle size, total cholesterol, apolipoproteins, and  
 174 triglycerides (TG). Studies that reported ratios of the aforementioned lipid parameters  
 175 (e.g. HDL-cholesterol to total cholesterol ratio) were also included. Both observational  
 176 and interventional studies were included, as well as single-gene, polygenic and genome-  
 177 wide association studies (GWAS). Differences in study designs and methods were  
 178 considered when developing the overall evidence grades, as further detailed below.  
 179 Associations/interactions reported in two independent studies formed the basis of the  
 180 inclusion criteria for objective 2, in which nutrigenetic associations/interactions were

181 prioritized for evidence grading. This is further detailed in Table 1 and the section below  
182 entitled “Evidence Grading.”

### 183 *Article Selection and Data Extraction*

184 Two independent investigators (JK and VG) screened articles using the computer  
185 software *Covidence* (including title, abstract, and full-text screening) and extracted data  
186 from the included articles. Reference lists of included articles and of a systematic review  
187 on a similar topic (35) were also screened for relevant articles. Data extraction templates  
188 were piloted by two independent investigators (JK and VG) on ten included studies and  
189 revised accordingly. The final data extraction templates included the following  
190 components for each study: first author name and year, study design, genetic approach,  
191 population and sample size, study duration (interventional studies only), genes and single  
192 nucleotide polymorphisms (SNPs) analyzed with rs numbers, quantity and type of  
193 omega-3, comparisons (e.g. a control group or different amount/type of omega-3s as well  
194 as genetic grouping), lipid/lipoprotein outcome(s), whether or not the study reported that  
195 they followed STREGA guidelines and a summary of statistically significant study  
196 findings relevant to the research question. Corresponding authors of included studies  
197 were contacted as needed to provide clarity and/or additional information about the  
198 included studies.

### 199 *Evidence Grading*

200 Upon reading all full-text articles included, and summarizing the body of evidence  
201 (Tables 2 and 3), SNPs/nutrigenetic risk scores (nutri-GRSs) and subsequent  
202 lipid/lipoprotein/apolipoprotein outcomes were systematically prioritized and selected for



1  
2  
3 203 evidence grading, if a specific nutrigenetic association/interaction was reported in at least  
4  
5 204 two independent studies. To clarify, this refers to the same SNP(s)/nutri-GRS [or SNPs  
6  
7  
8 205 in strong linkage disequilibrium (LD)] being assessed and influencing the same  
9  
10 206 lipid/lipoprotein outcome in at least two studies. For these nutrigenetic  
11  
12 207 associations/interactions, we proceeded with evidence grading, while including **all**  
13  
14 208 studies relevant to the particular nutrigenetic association/interaction, irrespective of the  
15  
16 209 findings. Consistency of results was then one of several factors considered when grading  
17  
18 210 the body of evidence. The Grading of Recommendations Assessment, Development and  
19  
20 211 Evaluation (GRADE) approach indicates that a single study rarely (if ever) results in  
21  
22 212 strong evidence, but two studies (typically RCTs) can indicate strong evidence if they are  
23  
24 213 graded highly using the GRADE criteria (36). Prior to selecting the nutrigenetic  
25  
26 214 associations/interactions (genetic variants and lipid/lipoprotein/apolipoprotein outcomes)  
27  
28 215 for evidence grading, LD was assessed using the SNIPA SNP Annotator Software (37)  
29  
30 216 for genes located on the same chromosome and arm (determined using the Online  
31  
32 217 Mendelian Inheritance in Man® [OMIM] database) as outlined in the summary of  
33  
34 218 results' tables in the column labelled 'Cytogenic Location of Gene(s)' (Tables 1 and 2).  
35  
36 219 Strong LD was defined as  $r^2 > 0.8$  and location  $< 250$  kb away from the index SNP  
37  
38 220 location. SNPs in strong LD were considered together for the purposes of evidencing  
39  
40 221 grading.

41  
42  
43 222 Based on our abovementioned predetermined criteria for specific nutrigenetic topic  
44  
45 223 selection for evidence grading, nutrigenetic associations/interactions that were not  
46  
47 224 included in the evidence grading process likely have weak evidence (at minimum due to  
48  
49 225 lack of replication, for example, *ZNT8* rs13266634 and HDL-c or TG responsiveness to  
50  
51  
52  
53  
54  
55  
56  
57  
58  
59  
60

1  
2  
3 226 omega-3, which has only been assessed in a single study (38)). According to the GRADE  
4  
5 227 guidelines, when only a single study exists indicating significant findings for an outcome  
6  
7 228 of interest (especially when the study is observational), the overall quality of the evidence  
8  
9  
10 229 is generally rated to be low or very low (39). Therefore, our process for prioritizing  
11  
12 230 nutrigenetic topics for evidence grading aimed to filter out specific nutrigenetic  
13  
14 231 associations/interactions that would likely be deemed low or very low quality (based on,  
15  
16 232 at minimum, lack of replication). Two authors (JK and VG) critically appraised the  
17  
18 233 selected nutrigenetic interactions using the GRADE methodology (39,40). Nutrigenetic  
19  
20 234 interactions were grouped according to studies assessing the same SNP(s)/nutri-GRS and  
21  
22 235 lipid/lipoprotein/apolipoprotein outcome, and the quality of the body of evidence (studies  
23  
24 236 with significant and non-significant results) was rated; this process was guided by the  
25  
26 237 GRADE Evidence Profile, which included consideration of risk of bias, inconsistency,  
27  
28 238 indirectness, imprecision, publication bias, plausible confounding, dose-response and  
29  
30 239 other factors (39). For example, different sources of omega-3s (e.g. EPA+DHA vs. ALA;  
31  
32 240 food sources vs. supplementation) were taken into consideration when grading the  
33  
34 241 evidence through the analysis of indirectness within the GRADE approach (39,40). Risk  
35  
36 242 of bias was assessed in each of the included interventional and observational studies  
37  
38 243 using the National Institutes of Health Study Quality Assessment Tools, in line with  
39  
40 244 recently published recommendations for risk of bias assessments (41). To assess  
41  
42 245 measures of precision, coefficients of variation (CV) were calculated based on outcome  
43  
44 246 means (mean change or absolute values – whichever was used for the analyses) and  
45  
46 247 standard deviations. In cases where standard errors of the mean were reported, these were  
47  
48 248 converted to standard deviations to calculate the CV. The nutrigenetic interactions were  
49  
50  
51  
52  
53  
54  
55  
56  
57  
58  
59  
60

249 each given an evidence grade of high, moderate, low or very low.

## 250 **Results**

251  
252 Figure 1 outlines the PRISMA Flow Diagram, which was used to guide the systematic  
253 review. Supplementary Tables 2 and 3 provide a summary of the 65 included studies. The  
254 results columns of Supplementary Tables 2 and 3 (far right) indicate nutrigenetic findings  
255 that were statistically significant. Any results related to the studies' analyzed SNPs and  
256 outcomes of interest that were not statistically significant are not indicated in the results  
257 column. No studies explicitly reported that they followed STREGA guidelines. LD  
258 analysis of SNPs tested in different studies revealed strong LD in several SNPs from the  
259 *FADS* gene cluster (see Table 2 footnote). As such, LD was taken into consideration in  
260 the selection of nutrigenetic interactions selected for evidence grading.

### 261 *Observational Studies*

262 Of the 65 included studies, 23 were observational with the majority of these being cross-  
263 sectional, as outlined in Supplementary Table 2. A total of 62,221 participants were  
264 included in the observational studies. These studies assessed correlations among a  
265 number of different genetic variations and outcomes, with several studies assessing  
266 genetic variations in the *FADS* gene cluster (42–48), *TNF $\alpha$*  (49–51) and *PPAR $\alpha$*  (52–54).  
267 Most studies (n=13) assessed total omega-3s (38,42,47–49,51,54–60). The intake and  
268 type of omega-3s, lipid/lipoprotein/apolipoprotein outcomes and associations revealed  
269 from these studies were variable as further detailed in Supplementary Table 2. In the  
270 observational studies assessing genetic variation in the *FADS* gene cluster, some studies  
271 indicated significant gene-diet findings related to HDL-cholesterol, LDL-cholesterol, TG,

272 total-cholesterol while other studies demonstrated no significant gene-diet interactions for  
273 these outcomes thus indicating notable inconsistency among the results, while  
274 considering that SNPs differed by studies (42–48). In the observational studies focused  
275 on genetic variation in the *TNF $\alpha$*  gene, there was some evidence of a gene-diet  
276 relationship for omega-3 and LDL-cholesterol, total-cholesterol and total-  
277 cholesterol:HDL-cholesterol ratio, but again, results differed between studies (49–51).  
278 For gene-diet relationships and *PPAR $\alpha$*  genetic variation, individual studies indicated  
279 significant findings related to total-cholesterol, LDL-cholesterol, TG, apoC-III and LDL  
280 peak particle diameter (52–54). Comprehensive details of the observational studies are  
281 outlined in Supplementary Table 2.

### 282 *Interventional Studies*

283 Of the 65 included studies, 42 were interventional including 16 randomized trials. Non-  
284 randomized studies included single arm clinical trials and sequential non-randomized  
285 cross-over interventions. For interventional studies, n=6,225 participants upon combining  
286 all sample sizes of the included studies. Again, these studies assessed relationships  
287 between a number of different genetic variants and study outcomes. In more recent years,  
288 several studies (n=8) used a nutri-GRS or polygenic approaches (61–68) given the  
289 plausibility that many gene-lipid/lipoprotein/apolipoprotein and omega-3 interactions are  
290 polygenic in nature. Numerous studies assessed genetic variations in the *FADS* gene  
291 cluster (61,62,69–71), *APOE* (61,71–80), *CD36* (67,81,82), *PPAR $\gamma$ 2* (62,67,83–85) and  
292 *PPAR $\alpha$*  (83,86,87). Among these studies, results related to significant gene-diet (omega-  
293 3) associations influencing lipid/lipoprotein outcomes were generally inconsistent except  
294 for *APOE* (rs429358 and rs7412), omega-3 and TG in males only (71–75,77–80), and for

1  
2  
3 295 a 31-SNP nutri-GRS, omega-3 and TG (65,66). There was also consistent evidence to  
4  
5 296 indicate a lack of association among *PPAR* $\gamma$ 2 (rs1801282) genetic variation, EPA+DHA  
6  
7 297 and LDL cholesterol (62,67,84,85,88). Most studies (n=40) used supplemental EPA  
8  
9 298 and/or DHA sources of omega-3s for the dietary intervention (see Supplementary Table  
10  
11 299 3). The dosage/intake and type of omega-3s were variable with EPA and/or DHA dosages  
12  
13 300 ranging from 0.5-3.7 g/day across different studies, and one study with an ALA  
14  
15 301 intervention dosage of 8.1 g/day, as further detailed in Table 3.  
16  
17  
18  
19

### 20 302 *Levels of Evidence Using GRADE*

21  
22  
23 303 A total of 25 articles were included in the evidence grading process, representing 11  
24  
25 304 unique nutrigenetic associations/interactions as outlined in Tables 2 and 3, and  
26  
27 305 Supplementary Table 4. Through the GRADE process, it was determined that there is  
28  
29 306 strong evidence (GRADE rating: moderate quality) for *APOE* genotypes (rs7412,  
30  
31 307 rs429358), omega-3s and TG lowering in male adults only (71–75,77–80). This evidence  
32  
33 308 suggests that adult males (but not females) with the *APOE*-E3/E4 or E4/E4 genotype  
34  
35 309 (rs429358, rs7412) tend to experience significant reductions in TG in response to 0.7-3.7  
36  
37 310 g/day of EPA and/or DHA, with higher dosages demonstrating greater TG lowering  
38  
39 311 effects (71–75,77–80). Furthermore, it was determined that there is strong evidence  
40  
41 312 (GRADE rating: high quality) for using a 31-SNP nutri-GRS (detailed in Supplementary  
42  
43 313 Tables 5 and 6) to assess the effectiveness of omega-3s for TG lowering in adults with  
44  
45 314 overweight/obesity in various ethnicities (65,66). The evidence suggests that in adults  
46  
47 315 with overweight/obesity, lower genetic risk scores demonstrate greater responsiveness to  
48  
49 316 omega-3 supplementation (65,66).  
50  
51  
52  
53  
54  
55  
56  
57  
58  
59  
60

1  
2  
3 317 All other evidence that was evaluated was determined to be weak (GRADE rating: low or  
4  
5 318 very low quality), as further detailed in Table 2. Imprecision, indirectness, and  
6  
7 319 inconsistency were common reasons for downgrading the evidence (refer to Table 2  
8  
9 320 footnote). There was evidence for a plausible mechanism of action for most of the  
10  
11 321 nutrigenetic interactions that were graded; evidence of a dose response was less common.  
12  
13  
14  
15  
16  
17  
18  
19  
20  
21  
22  
23  
24  
25  
26  
27  
28  
29  
30  
31  
32  
33  
34  
35  
36  
37  
38  
39  
40  
41  
42  
43  
44  
45  
46  
47  
48  
49  
50  
51  
52  
53  
54  
55  
56  
57  
58  
59  
60

**Table 2. GRADE Evidence Profile: Genetic Variation, Omega-3 and Lipids**

| Nutrigenetic interactions for omega-3 and plasma lipid/lipoprotein outcomes                                                                                                                                                         |                                  |                                    |                                   |                                       |                  |                           |                                   |                    |                                                                                                                                                                                            |
|-------------------------------------------------------------------------------------------------------------------------------------------------------------------------------------------------------------------------------------|----------------------------------|------------------------------------|-----------------------------------|---------------------------------------|------------------|---------------------------|-----------------------------------|--------------------|--------------------------------------------------------------------------------------------------------------------------------------------------------------------------------------------|
| Patient or Population: adults<br>Intervention/Exposure: dietary or supplemental omega-3 (EPA and/or DHA and/or ALA)<br>Comparison/Control: genetic variation, different omega-3 intakes<br>Outcomes: plasma lipids and lipoproteins |                                  |                                    |                                   |                                       |                  |                           |                                   |                    |                                                                                                                                                                                            |
| Gene rs Number and Lipid: Number and Type of Studies (total n)                                                                                                                                                                      | Limitations                      | Inconsistency                      | Indirectness                      | Imprecision                           | Publication Bias | Dose Response             | Biological Plausibility*          | Quality            | Conclusion                                                                                                                                                                                 |
| <b>CD36 rs1761667 and HDL-c:</b><br>1 RCT and 1 single arm trial (n=115) (81,89)                                                                                                                                                    | Serious limitations <sup>a</sup> | Serious inconsistency <sup>b</sup> | Serious indirectness <sup>c</sup> | Serious imprecision <sup>d</sup>      | Undetected       | No evidence of a gradient | Evidence of a mechanism of action | ⊕⊕⊖⊖<br>(Low)      | Weak evidence suggests that possessing the GA or possibly the AA genotype of <i>CD36</i> rs1761667 could lead to significant increases in HDL-c in response to 0.8-3.0 g/day of omega-3s.  |
| <b>CD36 rs1761667 and TG:</b><br>1 RCT and 1 single arm trial (n=115) (81,89)                                                                                                                                                       | Serious limitations <sup>a</sup> | Serious inconsistency <sup>b</sup> | Serious indirectness <sup>c</sup> | Serious imprecision <sup>e</sup>      | Undetected       | No evidence of a gradient | Evidence of a mechanism of action | ⊕⊕⊖⊖<br>(Low)      | Weak evidence suggests that possessing the GA or possibly the GG genotype of <i>CD36</i> rs1761667 could lead to significant reductions in TG in response to 0.8-3.0 g/day of omega-3s.    |
| <b>CD36 rs1049673 and HDL-c:</b><br>1 RCT and 1 single arm trial (n=115) (81,89)                                                                                                                                                    | Serious limitations <sup>a</sup> | Serious inconsistency <sup>b</sup> | Serious indirectness <sup>c</sup> | No serious imprecision                | Undetected       | No evidence of a gradient | Evidence of a mechanism of action | ⊕⊕⊖⊖<br>(Low)      | Weak evidence suggests that possessing the CG or possibly the CC genotype of <i>CD36</i> rs1049673 could lead to significant increases in HDL-c in response to 0.8-3.0 g/day of omega-3s.  |
| <b>CD36 rs1527483 and TG:</b><br>1 RCT and 1 single arm trial (n=250) (67,81)                                                                                                                                                       | Serious limitations <sup>f</sup> | No serious inconsistency           | Serious indirectness <sup>g</sup> | Very serious imprecision <sup>e</sup> | Undetected       | No evidence of a gradient | Evidence of a mechanism of action | ⊕⊕⊖⊖<br>(Low)      | Weak evidence suggests that possessing the GG genotype of <i>CD36</i> rs1527483 could lead to significant decreases in TG in response to approximately 2.0 g/day of EPA+DHA (but not ALA). |
| <b>APOE rs429358, rs7412 and TG:</b> 4 RCTs and 5 single arm trials (1 single arm trial consisted of a                                                                                                                              | No serious limitations           | No serious inconsistency           | Serious indirectness <sup>h</sup> | No serious imprecision                | Undetected       | Evidence of a gradient    | Evidence of a mechanism of action | ⊕⊕⊕⊖<br>(Moderate) | Strong evidence suggests that adult males (but not females) with the <i>APOE</i> -E3/E4 or E4/E4 genotype (rs429358, rs7412) experience significant reductions in TG in                    |

1  
2  
3  
4  
5  
6  
7  
8  
9  
10  
11  
12  
13  
14  
15  
16  
17  
18  
19  
20  
21  
22  
23  
24  
25  
26  
27  
28  
29  
30  
31  
32  
33  
34  
35  
36  
37  
38  
39  
40  
41  
42  
43  
44  
45  
46  
47

|                                                                                                                                                                                                                                           |                                        |                                         |                                        |                                  |            |                                     |                                                     |                                                                              |                                                                                                                                                                                                                                                                                                                                                                                                                                                  |
|-------------------------------------------------------------------------------------------------------------------------------------------------------------------------------------------------------------------------------------------|----------------------------------------|-----------------------------------------|----------------------------------------|----------------------------------|------------|-------------------------------------|-----------------------------------------------------|------------------------------------------------------------------------------|--------------------------------------------------------------------------------------------------------------------------------------------------------------------------------------------------------------------------------------------------------------------------------------------------------------------------------------------------------------------------------------------------------------------------------------------------|
| subset sample of another single arm trial) (n=980) (71-75,77-80)                                                                                                                                                                          |                                        |                                         |                                        |                                  |            |                                     |                                                     |                                                                              | response to 0.7-3.7 g/day of EPA and/or DHA. Higher dosages may have greater TG lowering effects.                                                                                                                                                                                                                                                                                                                                                |
| <b>APOE rs429358, rs7412 and Total-c:</b> 4 RCTs, 5 single arm trials (1 single arm trial consisted of a subset sample of another single arm trial), 1 cross-sectional and longitudinal analysis within an RCT (n=2,446) (55,71-75,77-80) | No serious limitations                 | Serious inconsistency <sup>i</sup>      | Serious indirectness <sup>h</sup>      | No serious imprecision           | Undetected | No evidence of a gradient           | Lack of evidence of a mechanism of action           | ⊕⊕⊕⊖<br>(Moderate: Males and Females)<br><br>and<br><br>⊕⊕⊖⊖<br>(Low: Males) | In males and females combined, strong evidence suggests that there is no nutrigenetic interaction between EPA and/or DHA, <i>APOE</i> (rs429358, rs7412) and total-c. There is no evidence of a nutrigenetic interaction between ALA, <i>APOE</i> (rs429358, rs7412) and total-c. In male subgroups, weak evidence suggests that there is no nutrigenetic interaction between ALA or EPA and/or DHA, <i>APOE</i> (rs429358, rs7412) and total-c. |
| <b>31-SNP Nutri-GRS and TG:</b> 1 RCT, 1 single arm trial (n=330) (65,66)                                                                                                                                                                 | No serious limitations                 | No serious inconsistency                | Serious indirectness <sup>j</sup>      | No serious imprecision           | Undetected | Evidence of a gradient <sup>k</sup> | Some evidence of a mechanism of action <sup>l</sup> | ⊕⊕⊕⊕<br>High                                                                 | Strong evidence suggests that in adults with overweight/obesity, a 31-SNP genetic risk score can predict TG responsiveness to EPA+DHA supplementation. Individuals with lower genetic risk scores demonstrate greater responsiveness to EPA+DHA for TG lowering.                                                                                                                                                                                 |
| <b>PPARG2 rs1801282 and LDL-c:</b> 4 RCTs, 1 single arm trial (n=670) (62,67,84,85,88)                                                                                                                                                    | No serious limitations                 | No serious inconsistency                | Serious indirectness <sup>m</sup>      | Serious imprecision <sup>n</sup> | Undetected | No evidence of a gradient           | Lack of evidence of a mechanism of action           | ⊕⊕⊕⊖<br>(Moderate)                                                           | Strong evidence suggests that genetic variation in <i>PPARG2</i> (rs1801282) does not influence LDL-c responses to omega-3s (EPA+DHA).                                                                                                                                                                                                                                                                                                           |
| <b>PPARG2 rs1801282 and Total-c:</b> 4 RCTs, 1 single arm trial (n=670) (62,67,84,85,88)                                                                                                                                                  | No serious limitations                 | Serious inconsistency <sup>o</sup>      | Serious indirectness <sup>m</sup>      | Serious imprecision <sup>n</sup> | Undetected | No evidence of a gradient           | Lack of evidence of a mechanism of action           | ⊕⊕⊖⊖<br>(Low)                                                                | Weak evidence suggests that possessing the CG or GG genotype of <i>PPARG2</i> (rs1801282) could lead to significant increases in total-c in response to approximately 3 g/day of omega-3s (EPA+DHA) in individuals with overweight or obesity, but not for individuals without overweight or obesity.                                                                                                                                            |
| <b>PPARG2 rs1801282 and TG:</b> 4 RCTs, 1 single arm trial (n=670) (62,67,84,85,88)                                                                                                                                                       | No serious limitations                 | Very serious inconsistency <sup>p</sup> | Serious indirectness <sup>m</sup>      | Serious imprecision <sup>n</sup> | Undetected | No evidence of a gradient           | Evidence of a mechanism of action                   | ⊕⊕⊖⊖<br>(Low)                                                                | Weak evidence suggests that genetic variation in <i>PPARG2</i> (rs1801282) does not influence total-c responses to omega-3s (EPA+DHA), but when dietary total fat and saturated fat intake are low, nutrigenetic interactions may exist.                                                                                                                                                                                                         |
| <b>FADS (rs174547**) and Total-c:</b> 2 RCTs, 1 single-arm trial, 4 cross-                                                                                                                                                                | Very serious risk of bias <sup>q</sup> | No serious inconsistency                | Very serious indirectness <sup>r</sup> | Serious imprecision <sup>n</sup> | Undetected | No evidence of a gradient           | Evidence of a mechanism of action                   | ⊕⊖⊖⊖<br>(Very Low)                                                           | Weak evidence suggests that genetic variation in <i>FADS</i> (rs174547**) does not influence total-c responses to omega-3.                                                                                                                                                                                                                                                                                                                       |



1  
2  
3  
4  
5  
6  
7  
8  
9  
10  
11  
12  
13  
14  
15  
16  
17  
18  
19  
20  
21  
22  
23  
24  
25  
26  
27  
28  
29  
30  
31  
32  
33  
34  
35  
36  
37  
38  
39  
40  
41  
42  
43  
44  
45  
46  
47

|                                                      |  |  |  |  |  |  |  |  |  |
|------------------------------------------------------|--|--|--|--|--|--|--|--|--|
| sectional studies (n=9365)<br>(44,45,47,48,61,69,71) |  |  |  |  |  |  |  |  |  |
|------------------------------------------------------|--|--|--|--|--|--|--|--|--|

\*Direct mechanisms of action were considered

\*\*FADS rs174547 was in strong LD with the following SNPs from other included studies and therefore these SNPs were also included in the selection of studies assessing FADS genetic variation, n-3 intake and LDL-c: rs174546, rs174599, rs174601, rs174583, rs1353, rs174561, rs174556, rs174545, rs174537 and rs174576.

HDL-c: high-density lipoprotein cholesterol, LDL-c: low-density lipoprotein cholesterol, TG: triglycerides, total-c: total cholesterol

- a. Small sample sizes, especially among homozygous groups in the RCT (with a larger heterozygous group, potentially affecting the results)
- b. Some variation in results by genotype
- c. One study sample consisted of all males while the other sample consisted of both men and women; differences in age and n-3 dosages (with some overlap)
- d. Coefficient of variation >1 for all significant values
- e. Coefficient of variation substantially >1 for several values
- f. Small sample size within genotype groups for minor allele homozygote and heterozygote groups in the RCT
- g. One study sample consisted of all men while the other consisted of men and postmenopausal women with type 2 diabetes
- h. Differences in age, omega-3 dosages, and types (with some overlap), and dietary interventions even when considering studies with male study samples separate from male + female study samples
- i. Serious inconsistency for men subgroup only; men + women samples were consistent
- j. EPA and DHA separate on one study and EPA+DHA in the other, sample stratified into two groups in one study (responders and non-responders) and separated into three groups (responders, non-responders and adverse responders)
- k. Evidence of a gradient for GRS and TG responsiveness to omega-3 supplementation
- l. Some evidence of a potential mechanism of action for *IQCJ-SCHIP1*, *NXP1*, *PHF17*, *MYB* and *NELL1* as discussed by Rudkowska et al. (63), Vallée Marcotte et al. (64)
- m. Differences in population (healthy adults, adults with chronic disease or obesity, infants), some variation in length of follow-up
- n. Downgraded precision as it was not possible to assess precision in most studies due to lack of reporting of means and SD/SEM
- o. Some variation in results even when considering differences in BMI and populations among studies
- p. Major variability in results even when considering differences in BMI and populations among studies
- q. Risk of bias detected in every study except one
- r. Major differences in populations, types and amounts of omega-3 and follow-up for interventional studies

**Table 3. Summary of Risk of Bias Across SNPs and Outcomes Following Omega-3 Exposure/Intervention**

| <i>CD36, rs1761667 and HDL-c</i>          |                     |
|-------------------------------------------|---------------------|
| <b>Study</b>                              | <b>Risk of Bias</b> |
| Dawczynski et al. 2013                    | ⊖                   |
| Madden et al. 2008                        | ⊖                   |
| <i>CD36, rs1761667 and TG</i>             |                     |
| <b>Study</b>                              | <b>Risk of Bias</b> |
| Dawczynski et al. 2013                    | ⊖                   |
| Madden et al. 2008                        | ⊖                   |
| <i>CD36, rs1049673 and HDL-c</i>          |                     |
| <b>Study</b>                              | <b>Risk of Bias</b> |
| Dawczynski et al. 2013                    | ⊖                   |
| Madden et al. 2008                        | ⊖                   |
| <i>CD36, rs1527483 and TG</i>             |                     |
| <b>Study</b>                              | <b>Risk of Bias</b> |
| Zheng et al. 2018                         | ⊕                   |
| Madden et al. 2008                        | ⊖                   |
| <i>ApoE, rs429358, rs7412 and TG</i>      |                     |
| <b>Study</b>                              | <b>Risk of Bias</b> |
| AbuMweis et al. 2018                      | ⊖                   |
| Carvalho-Wells et al. 2012                | ⊕                   |
| Caslake et al. 2008                       | ⊕                   |
| Dang et al. 2015                          | ⊕                   |
| Jackson et al. 2012                       | ⊖                   |
| Minihane et al. 2000                      | ⊕                   |
| Olano-Martin et al. 2010                  | ⊕                   |
| Paschos et al. 2005                       | ⊖                   |
| Thifault et al. 2013                      | ⊕                   |
| <i>ApoE, rs429358, rs7412 and Total-c</i> |                     |
| <b>Study</b>                              | <b>Risk of Bias</b> |
| AbuMweis et al. 2018                      | ⊖                   |
| Carvalho-Wells et al. 2012                | ⊕                   |
| Caslake et al. 2008                       | ⊕                   |
| Dang et al. 2015                          | ⊕                   |
| Fallaize et al. 2016                      | ⊖                   |
| Jackson et al. 2012                       | ⊖                   |
| Minihane et al. 2000                      | ⊕                   |
| Olano-Martin et al. 2010                  | ⊕                   |
| Paschos et al. 2005                       | ⊖                   |
| Thifault et al. 2013                      | ⊕                   |
| <i>31-SNP Nutri-GRS and TG</i>            |                     |
| <b>Study</b>                              | <b>Risk of Bias</b> |
| Vallée Marcotte et al. 2019               | ⊕                   |
| Vallée Marcotte et al. 2020               | ⊕                   |

| <i>PPARG2</i> , rs1801282 and LDL-c   |              |
|---------------------------------------|--------------|
| Study                                 | Risk of Bias |
| Binia et al. 2017                     | ⊖            |
| Harslof et al. 2014                   | ⊕            |
| Itariu et al. 2012                    | ⊕            |
| Lindi et al. 2003                     | ⊖            |
| Zheng et al. 2018                     | ⊕            |
| <i>PPARG2</i> , rs1801282 and Total-c |              |
| Study                                 | Risk of Bias |
| Binia et al. 2017                     | ⊖            |
| Harslof et al. 2014                   | ⊕            |
| Itariu et al. 2012                    | ⊕            |
| Lindi et al. 2003                     | ⊖            |
| Zheng et al. 2018                     | ⊕            |
| <i>PPARG2</i> , rs1801282 and TG      |              |
| Study                                 | Risk of Bias |
| Binia et al. 2017                     | ⊖            |
| Harslof et al. 2014                   | ⊕            |
| Itariu et al. 2012                    | ⊕            |
| Lindi et al. 2003                     | ⊖            |
| Zheng et al. 2018                     | ⊕            |
| <i>FADS</i> , rs174547 and Total-c    |              |
| Study                                 | Risk of Bias |
| AbuMweis et al. 2018                  | ⊖            |
| Alsaleh et al. 2014                   | ⊕            |
| Lu et al. 2010                        | ⊖            |
| Standl et al. 2012                    | ⊖            |
| Dumont et al. 2011                    | ⊖            |
| Dumont et al. 2018                    | ⊖            |
| Roke and Mutch 2014                   | ⊖            |

⊕ no serious risk of bias; ⊖ serious risk of bias; ⊖⊖ very serious risk of bias (for study design type using NIH Study Quality Assessment Tools)

HDL-c: high-density lipoprotein cholesterol, LDL-c: low-density lipoprotein cholesterol, TG: triglycerides, total-c: total cholesterol

1  
2  
3 271 **DISCUSSION**

4 272  
5 273 Overall, this systematic review found strong evidence (i.e. GRADE ratings: moderate and  
6  
7  
8 274 high quality evidence) for only a limited amount of evidence in this area: *APOE*  
9  
10 275 (rs429358 and rs7412) genotypes and TG responsiveness to omega-3s in men, and a 31-  
11  
12 276 SNP nutri-GRS and TG responsiveness to omega-3s in adults with overweight/obesity.  
13  
14 277 Limited evidence exists for individual genetic-based responsiveness of omega-3s on  
15  
16 278 apolipoprotein and/or LDL particle size, with no studies from the present comprehensive  
17  
18 279 review meeting the criteria for evidence grading. This highlights the need for more  
19  
20 280 replication studies in this area. While more research exists on omega-3 responsiveness for  
21  
22 281 other lipid outcomes such as total-c, HDL-c and LDL-c, the level of evidence for  
23  
24 282 nutrigenetic interactions related to these outcomes remains low. Again, more studies are  
25  
26 283 needed related to these outcomes, including replication studies of previously identified  
27  
28 284 nutrigenetic interactions. These studies should first replicate the interventions (i.e. use the  
29  
30 285 same type and amount of omega-3s as the original study), and recruit samples with  
31  
32 286 similar characteristics to the original study. Once replication is established, research  
33  
34 287 should then seek to expand the population studied to improve generalizability and explore  
35  
36 288 the effectiveness of different interventions (i.e. different formulations and doses of  
37  
38 289 omega-3s). The variability of the interventions and sample sizes in the studies conducted  
39  
40 290 to date often resulted in the quality of evidence being downgraded (see Table 2). It should  
41  
42 291 also be noted that study heterogeneity precluded the ability to conduct a meta-analysis.  
43  
44 292 Thus, the GRADE approach worked well for evaluating the quality of the evidence given  
45  
46 293 that this approach takes into consideration several factors when determining the quality of  
47  
48  
49  
50  
51  
52  
53  
54  
55  
56  
57  
58  
59  
60

1  
2  
3 294 evidence such as risk of bias, indirectness of evidence, inconsistency or results,  
4  
5 295 imprecision and publication bias (39).  
6  
7  
8 296  
9  
10 297 It is important to note that our results demonstrating strong evidence for interactions  
11  
12 298 between *APOE* genotypes and lipid responses to omega-3s have notable ethical  
13  
14 299 implications. Compared to non-carriers, carriers of *APOE*-E4 have a 15 times greater risk  
15  
16 300 of developing Alzheimer's disease (90). Moreover, *APOE* genotypes are significantly  
17  
18 301 associated with CVD risk including risk of coronary artery disease and hyperlipidemia  
19  
20 302 (91–93). Interestingly, the pathology of Alzheimer's disease has been linked to  
21  
22 303 cardiovascular mechanisms (90). Future research should explore nutrigenetic interactions,  
23  
24 304 with risk of developing Alzheimer's disease as the study endpoint/outcome of interest.  
25  
26 305 Despite the current lack of knowledge about how diet may play a role in mitigating the  
27  
28 306 genetic-based risk of Alzheimer's disease, several potentially modifiable risk factors  
29  
30 307 account for around 40% of dementia and Alzheimer's disease globally (94), and the link  
31  
32 308 between Alzheimer's disease risk and *APOE* is well-established (95). Therefore, despite  
33  
34 309 the strong scientific validity identified in the present review, there are other factors that  
35  
36 310 must be considered before this test can be recommended for implementation in a practice  
37  
38 311 setting; this includes ethical, legal and social implications (96).  
39  
40 312  
41  
42 313 In addition, our finding of strong evidence for *APOE* genotypes and TG responsiveness  
43  
44 314 to omega-3s in men but not women speaks to the importance of taking biological sex into  
45  
46 315 account in nutrigenetics research. The importance of this has been further highlighted  
47  
48 316 elsewhere, where it has been noted that the results of nutrition and nutrigenetic research  
49  
50  
51  
52  
53  
54  
55  
56  
57  
58  
59  
60

1  
2  
3 317 may differ in men and women (97). For example, UDP-glucuronidation isoenzyme  
4  
5 318 expression profiles have been demonstrated to be regulated by sex hormones, and thus  
6  
7 319 sex-specific differences in glucuronidation of resveratrol have been observed (98). As  
8  
9  
10 320 more studies are completed, researchers may find that certain nutrigenetic interactions  
11  
12 321 differ depending on biological sex, ethnicity, age or other factors, similar to our findings  
13  
14 322 on *APOE*, omega-3s and TG in which there was robust evidence of a nutrigenetic  
15  
16 323 interaction in males only. Researchers may also find explanations for this, which are  
17  
18 324 currently poorly understood. In general, it is becoming increasingly recognized that  
19  
20 325 health-related responses to different interventions may vary based on biological sex; this  
21  
22 326 is an important consideration of personalized nutrition (97). Nutrigenetic research often  
23  
24 327 groups men and women together, but stratifying based on biological sex could provide  
25  
26 328 further insights for specific nutrigenetic interactions and could also help explain why  
27  
28 329 some replication studies have had conflicting findings (97). Moreover, biomedical  
29  
30 330 research in general historically has been conducted more in men than women; yet such  
31  
32 331 research findings are often generalized to women despite limited research conducted in  
33  
34 332 samples of women, which is problematic for a number of reasons (99). In the present  
35  
36 333 review, the evidence was strong for the *APOE* findings in men only, but not women in  
37  
38 334 part because there were more studies conducted in men. Specifically, there were five  
39  
40 335 studies conducted in men and women (combined) (71,73,74,100,101), and four studies  
41  
42 336 conducted in samples of only men (75,78,79,102), yet no studies conducted in samples of  
43  
44 337 only women. This brings to light important issues of equity and warrants further  
45  
46 338 discussion and consideration.  
47  
48  
49  
50  
51  
52  
53  
54 339

1  
2  
3 340 As research continues to develop, it appears likely that lipid and lipoprotein responses are  
4  
5 341 polygenic in nature. Therefore, future research should consider using nutri-GRSs or other  
6  
7  
8 342 polygenic methods of assessing responsiveness to nutrition interventions. This work  
9  
10 343 should use unbiased approaches or non-hypothesis driven approach to derive nutri-GRSs,  
11  
12 344 such as establishing them from genetic-wide association studies. In addition to the two  
13  
14 345 studies meeting the criteria for evidence grading (65,66), a modified version of the 31-  
15  
16 346 SNP GRS was tested in men and women in the FINGEN study, using 23 of the 31 SNPs  
17  
18 347 (65). While this did not meet our inclusion criteria for evidence grading given that a  
19  
20 348 different GRS was used, the 23-SNP GRS was significantly associated with TG  
21  
22 349 responsiveness to omega-3 supplementation in this population as well, providing further  
23  
24 350 evidence for the scientific validity of this nutrigenetic interaction (65).  
25  
26  
27  
28  
29

30  
31 352 While we used the GRADE approach to evaluate the body of evidence, several tools are  
32  
33 353 available for evaluating the quality of scientific evidence, though no generally accepted  
34  
35 354 methods exist for nutrigenetic research specifically. In 2017, Grimaldi et al. proposed a  
36  
37 355 set of guidelines to assess the scientific validity of genotype-based dietary advice (30).  
38  
39 356 While we originally intended to use these guidelines for assessing the evidence, we came  
40  
41 357 across some limitations that ultimately led us to use the GRADE guidelines. Specifically,  
42  
43 358 Grimaldi et al. (2017) suggested that only studies that include STREGA guidelines  
44  
45 359 should be included in the assessment of scientific validity (30). However, limiting the  
46  
47 360 evidence to only these studies could result in several important studies being missed. In  
48  
49 361 the present review, none of the included studies explicitly indicated that they followed  
50  
51 362 STREGA guidelines. In addition, it was recommended by Grimaldi et al. to use STREGA  
52  
53  
54  
55  
56  
57  
58  
59  
60

1  
2  
3 363 guidelines to assess risk of bias (30). However, the STREGA checklist is only intended  
4  
5 364 for observational genetic association studies - not interventional research (103). In the  
6  
7 365 present review, 42 of the 65 included studies were interventional (65%) (Supplementary  
8  
9 366 Table 3). In addition, the STREGA guidelines are intended to improve the transparency  
10  
11 367 and adequate reporting of genetic association studies, but it is not intended to be used as a  
12  
13 368 study quality assessment tool (103). However, Grimaldi et al. nicely highlighted the  
14  
15 369 importance of understanding the nature of the genetic variation, at a functional level,  
16  
17 370 when assessing scientific validity (30). This is not included in the standard GRADE  
18  
19 371 approach but is an important niche component of nutrigenetic research. As such, an  
20  
21 372 analysis of functional SNPs (biological plausibility) was included as an additional  
22  
23 373 component of the standard GRADE process, as indicated in the methods section above.  
24  
25 374 Overall, we found that the methods used in this systematic review were effective and can  
26  
27 375 be used to synthesize and evaluate nutrigenetic studies assessing other gene-nutrient-  
28  
29 376 health outcome interactions.  
30  
31  
32  
33  
34  
35  
36  
37

38 378 The additional consideration of functional SNPs to the standard GRADE approach helped  
39  
40 379 to strengthen this review, as biological mechanistic evidence can help ensure that study  
41  
42 380 findings did not occur by chance alone, and this is a component of evidence evaluation  
43  
44 381 frameworks in medical genetics (104,105). Transcriptomic and pathway analyses can  
45  
46 382 help inform the direction of future nutrigenetic studies by generating hypotheses about  
47  
48 383 the impact of specific genetic variations on varying responses to nutrition on health-  
49  
50 384 related outcomes. For example, using transcriptomics and pathway analyses to identify  
51  
52 385 changes in lipid metabolism following omega-3 supplementation, Rudkowska and  
53  
54  
55  
56  
57  
58  
59  
60



1  
2  
3 386 colleagues identified six genes expressed in opposite directions between responders and  
4  
5 387 non-responders to omega-3 supplementation for TG lowering: *FADS2*, *PLA2G4A*,  
6  
7 388 *ALOX15*, *PEMT*, *MGLL* and *GPAM* (106). Tremblay et al. then built on this knowledge  
8  
9  
10 389 and discovered that *PLA2G6* rs132989, *PLA2G7* rs679667, *PLA2G2D* rs12045689,  
11  
12 390 *PLA2G4A* rs10752979 and rs1160719 together explained 5.9% of post- omega-3  
13  
14 391 supplementation TG levels, with several individual *PLA2G4A* SNPs also having a  
15  
16 392 significant impact on the TG lowering effect of omega-3 supplementation (107). Others  
17  
18 393 have built on this mechanistic knowledge as well (108). Future research should now seek  
19  
20 394 to replicate this work given that we found that there have been no replication studies  
21  
22 395 completed and thus, this research (107,108) did not meet the criteria for evidence  
23  
24 396 grading.

25  
26  
27 397  
28  
29  
30 398 In the current body of literature, there are some limitations that should be highlighted.  
31  
32 399 Given the variability in allele frequencies for each SNP, it should be noted that study  
33  
34 400 limitations can arise with small sample sizes whereby some genotype groups may not be  
35  
36 401 adequately powered to detect significant differences. For example, Dawczynski et al.  
37  
38 402 (2013) detected significant changes in TG among the GA genotype group of *CD36*  
39  
40 403 rs1761667 (n=18) in response to omega-3s but neither of the homozygote groups (AA:  
41  
42 404 n=8, GG: n=7) exhibited a significant difference, despite similar directions and  
43  
44 405 magnitudes of effect among the GA and GG genotypes (82). It is thus possible that this  
45  
46 406 study was not adequately powered. Some researchers aim to mitigate this issue of small  
47  
48 407 numbers by grouping minor allele carriers together (i.e. heterozygotes + homozygotes for  
49  
50 408 the minor allele) (69). However, such an approach precludes the possibility to detect an  
51  
52  
53  
54  
55  
56  
57  
58  
59

1  
2  
3 409 allele-dosage effect. From a physiological perspective, an allele dosage effect would be  
4  
5 410 expected whereby a significant change among a heterozygote group would likely be  
6  
7 411 accompanied by a significant change in one of the homozygote groups but with an even  
8  
9 412 greater magnitude of the effect. This consideration highlights the importance of having an  
10  
11 413 adequately powered sample size, while factoring in the prevalence of each genotype.  
12  
13  
14  
15 414

16  
17 415 While single SNP research provides important information about individual gene-nutrient  
18  
19 416 interactions, the results of this review indicate that individual responses to omega-3s for  
20  
21 417 altering lipids, lipoproteins and apolipoproteins appear to be polygenic in nature. Thus,  
22  
23 418 we encourage researchers to further explore the use of nutri-GRSs to improve the  
24  
25 419 accuracy of genetic-based predictions. See, for example, the work of Vallée Marcotte et  
26  
27 420 al., which obtained a high quality evidence grade in the present review (65,66). This is  
28  
29 421 further exemplified in the analyses recently conducted by Chen et al. (42), which has yet  
30  
31 422 to be replicated and thus was not selected for evidence grading.  
32  
33  
34  
35 423

36  
37 424 The present analysis of scientific validity provides an important first step towards the  
38  
39 425 eventual development of clinical practice guidelines for genetic-based responses to  
40  
41 426 dietary intake. With questionable and variable scientific validity of existing consumer  
42  
43 427 nutrigenetic tests, the development of clinical practice guidelines is an important next  
44  
45 428 step as these can be used by HCPs and industry alike to help promote evidence-based  
46  
47 429 practice in personalized nutrition. Ideally, industry should use future clinical practice  
48  
49 430 guidelines to inform the nutrigenetic associations and related dietary recommendations  
50  
51 431 included in their reports. Decision aids can also be useful to guide clinical practice for  
52  
53  
54  
55  
56  
57  
58  
59  
60

1  
2  
3 432 HCPs (109), and future research should seek to develop a decision aid related to omega-  
4  
5 433 3s and lipid/lipoprotein outcomes based on genetic variation.  
6  
7

8 434  
9

10 435 It should be noted that there are some limitations to the present systematic review. First,  
11  
12 436 the literature was searched up until August 2020; as such, any articles published after this  
13  
14 437 date were not included. Furthermore, certain nutrigenetic associations/interactions were  
15  
16 438 prioritized for evidence grading therefore evidence grades remain unknown for numerous  
17  
18 439 associations/interactions included in the narrative synthesis. However, evidence from a  
19  
20 440 single study typically results in an evidence grade of low or very low using the GRADE  
21  
22 441 approach (39), therefore it is unlikely that any/many nutrigenetic associations/interactions  
23  
24 442 with strong scientific validity (which could be considered for use in clinical practice)  
25  
26 443 were missed. Future research groups may choose to instead select a specific SNP or nutri-  
27  
28 444 GRS as the focus of future systematic reviews. The specific SNP or nutri-GRS chosen  
29  
30 445 may be selected based on the results of a preliminary scoping review. This would allow  
31  
32 446 for all articles included in the systematic review to undergo evidence grading. The  
33  
34 447 approach taken in the present review was more comprehensive, but has its limitations as  
35  
36 448 stated above.  
37  
38  
39  
40  
41  
42  
43

44 449

45 450 Overall, we have provided a comprehensive overview the body of evidence related to  
46  
47 451 nutrigenetics, omega-3s and plasma lipids/lipoproteins/apolipoproteins, while providing  
48  
49 452 an overview of levels of evidence in this field. To our knowledge, this is the first  
50  
51 453 systematic review with GRADE evidence evaluation in the broader field of nutrigenetics.  
52  
53 454 The results of this work should be used in clinical practice guideline development, to  
54  
55  
56  
57  
58  
59  
60

1  
2  
3 455 ultimately guide evidence-based practice in personalized nutrition and move this  
4  
5 456 emerging field forward.  
6  
7

8 457  
9 458 **Sources of Support:** J.K. received postdoctoral fellowships from the Canadian Institute of  
10 459 Health Research, NUTRISS and INAF. I.R. holds a Junior 2 research Scholar from the Fonds de  
11 460 recherche du Québec—Santé (FRQ-S). M-C.V. holds a Tier 1 Canada Research Chair in  
12 461 Nutrition Applied to Genetics and Metabolic Health.  
13 462

14 463 **Contributorship Statements:** M-C.V. and J.K. conceptualized the review. G.S. was responsible  
15 464 for the search strategy, in collaboration with J.K., M-C.V., S.D. and V.G. J.K. and V.G. were  
16 465 responsible for article screening and selection, summarizing, evidence grading, and developing a  
17 466 draft of the systematic review. The first systematic review draft underwent revisions from S.D. and  
18 467 M-C.V., who provided overall supervision for the project. Following this, J.K., V.G., V.M.,  
19 468 D.M.M., J.R., I.R., G.S., S.D., and M-C.V. served as scientific advisors and reviewed and revised  
20 469 the full-text manuscript. J.K. wrote the first draft of the manuscript. J.K., V.G., V.M., D.M.M., J.R.,  
21 470 I.R., G.S., S.D., and M-C.V., reviewed, revised and approved the final manuscript.  
22  
23  
24  
25  
26  
27  
28  
29  
30  
31

32 471 **Competing Interests:** The authors have no competing interests to declare.  
33  
34

35 472 **Funding:** This project was supported through a pilot projects grant from INAF. J Keathley was  
36 473 supported through postdoctoral fellowships from CIHR (#430907), NUTRISS and INAF. M-C  
37 474 Vohl holds a Canada Research Chair in Genomics Applied to Nutrition and Metabolic Health.  
38  
39  
40

41 475 **Data Sharing Statement:** Data are available upon reasonable request.  
42  
43  
44  
45  
46  
47  
48  
49  
50  
51  
52  
53  
54  
55  
56  
57  
58  
59  
60

1  
2  
3  
4  
5  
6  
7  
8  
9  
10  
11  
12  
13  
14  
15  
16  
17  
18  
19  
20  
21  
22  
23  
24  
25  
26  
27  
28  
29  
30  
31  
32  
33  
34  
35  
36  
37  
38  
39  
40  
41  
42  
43  
44  
45  
46  
47  
48  
49  
50  
51  
52  
53  
54  
55  
56  
57  
58  
59  
60

478 **Figure Legend:**

479

480 **Figure 1. PRISMA Flow Diagram**

481 \*The original PRISMA Flow Diagram indicated the number of studies included in meta-analysis in this  
482 box. This has been revised for the purposes of this research

For peer review only

## References

1. Barquera S, Pedroza-Tobias A, Medina C, Hernandez-Barrera L, Bibbins-Domingo K, Lozano R, et al. Global overview of the epidemiology of atherosclerotic cardiovascular disease. *Arch Med Res*. 2015;46:328–38.
2. Rudkowska I, Guénard F, Julien P, Couture P, Lemieux S, Barbier O, et al. Genome-wide association study of the plasma triglyceride response to an n-3 polyunsaturated fatty acid supplementation. *J Lipid Res*. 2014 Jul;55(7):1245–53.
3. Rizzi F, Conti C, Dogliotti E, Terranegra A, Salvi E, Braga D, et al. Interaction between polyphenols intake and PON1 gene variants on markers of cardiovascular disease: a nutrigenetic observational study. *Journal of Translational Medicine*. 2016;14:186.
4. Zhang X, Qi Q, Zhang C, Smith SR, Hu FB, Sacks FM, et al. FTO Genotype and 2-Year Change in Body Composition and Fat Distribution in Response to Weight-Loss Diets: The POUNDS LOST Trial. *Diabetes*. 2012 Nov 1;61(11):3005–11.
5. Merritt DC, Jamnik J, El-Sohemy A. FTO genotype, dietary protein intake, and body weight in a multiethnic population of young adults: a cross-sectional study. *Genes Nutr*. 2018;13:4.
6. Vallée Marcotte B, Cormier V, Garneau V, Robitaille J, Desroches S, Vohl M-C. Nutrigenetic Testing for Personalized Nutrition: An Evaluation of Public Perceptions, Attitudes, and Concerns in a Population of French Canadians. *Lifestyle Genomics* [Internet]. 2019; Available from: <https://doi.org/10.1159/000499626>
7. Vallée Marcotte B, Cormier H, Garneau V, Robitaille J, Desroches S, Vohl M-C. Current knowledge and interest of French Canadians regarding nutrigenetics. *Genes Nutr*. 2019 Dec;14(1):5.
8. Caulfield T, McGuire AL. Direct-to-Consumer Genetic Testing: Perceptions, Problems, and Policy Responses. *Annu Rev Med*. 2012;63(1):23–33.
9. Horne J, Gilliland J, Madill J, Shelley J. A critical examination of legal and ethical considerations for nutrigenetic testing with recommendations for improving regulation in Canada: From science to consumer. *J Law Biosci*. 2020;
10. Görman U, Mathers JC, Grimaldi KA, Ahlgren J, Nordström K. Do we know enough? A scientific and ethical analysis of the basis for genetic-based personalized nutrition. *Genes Nutr*. 2013 Jul;8(4):373–81.
11. Harris WS. Stearidonic acid as a “pro-eicosapentaenoic acid.” *Curr Opin Lipidol*. 2012 Feb;23(1):30–4.
12. Shahidi F, Ambigaipalan P. Omega-3 Polyunsaturated Fatty Acids and Their Health Benefits. *Annu Rev Food Sci Technol*. 2018 25;9:345–81.

13. Hu Y, Hu FB, Manson JE. Marine Omega-3 Supplementation and Cardiovascular Disease: An Updated Meta-Analysis of 13 Randomized Controlled Trials Involving 127 477 Participants. *J Am Heart Assoc.* 2019;8(19):e013543.
14. Abdelhamid AS, Brown TJ, Brainard JS, Biswas P, Thorpe GC, Moore HJ, et al. Omega-3 fatty acids for the primary and secondary prevention of cardiovascular disease. *Cochrane Database Syst Rev* [Internet]. 2018 Jul 18 [cited 2020 Dec 1];2018(7). Available from: <https://www.ncbi.nlm.nih.gov/pmc/articles/PMC6513557/>
15. Jones PJH, Senanayake VK, Pu S, Jenkins DJA, Connelly PW, Lamarche B, et al. DHA-enriched high-oleic acid canola oil improves lipid profile and lowers predicted cardiovascular disease risk in the canola oil multicenter randomized controlled trial. *Am J Clin Nutr.* 2014 Jul;100(1):88–97.
16. Ballantyne CM, Bays HE, Kastelein JJ, Stein E, Isaacsohn JL, Braeckman RA, et al. Efficacy and Safety of Eicosapentaenoic Acid Ethyl Ester (AMR101) Therapy in Statin-Treated Patients With Persistent High Triglycerides (from the ANCHOR Study). *Am J Cardiol.* 2012 Oct 1;110(7):984–92.
17. Davidson MH, Stein EA, Bays HE, Maki KC, Doyle RT, Shalwitz RA, et al. Efficacy and tolerability of adding prescription omega-3 fatty acids 4 g/d to simvastatin 40 mg/d in hypertriglyceridemic patients: an 8-week, randomized, double-blind, placebo-controlled study. *Clin Ther.* 2007 Jul;29(7):1354–67.
18. Bradberry JC, Hilleman DE. Overview of Omega-3 Fatty Acid Therapies. *Pharm Ther.* 2013 Nov;38(11):681–91.
19. Skulas-Ray AC, Alaupovic P, Kris-Etherton PM, West SG. Dose-response effects of marine omega-3 fatty acids on apolipoproteins, apolipoprotein-defined lipoprotein subclasses, and Lp-PLA2 in individuals with moderate hypertriglyceridemia. *J Clin Lipidol.* 2015 Jun;9(3):360–7.
20. Lee MW, Park JK, Hong JW, Kim KJ, Shin DY, Ahn CW, et al. Beneficial Effects of Omega-3 Fatty Acids on Low Density Lipoprotein Particle Size in Patients with Type 2 Diabetes Already under Statin Therapy. *Diabetes Metab J.* 2013 Jun;37(3):207–11.
21. Bouwens M, van de Rest O, Dellschaft N, Bromhaar MG, de Groot LCPGM, Geleijnse JM, et al. Fish-oil supplementation induces antiinflammatory gene expression profiles in human blood mononuclear cells. *Am J Clin Nutr.* 2009 Aug;90(2):415–24.
22. Rudkowska I, Paradis A-M, Thifault E, Julien P, Tchernof A, Couture P, et al. Transcriptomic and metabolomic signatures of an n-3 polyunsaturated fatty acids supplementation in a normolipidemic/normocholesterolemic Caucasian population. *J Nutr Biochem.* 2013 Jan;24(1):54–61.
23. Merched AJ, Chan L. Nutrigenetics and Nutrigenomics of Atherosclerosis. *Curr Atheroscler Rep.* 2013 Jun;15(6):328.
24. Madden J, Williams CM, Calder PC, Lietz G, Miles EA, Cordell H, et al. The impact of common gene variants on the response of biomarkers of cardiovascular disease (CVD) risk to increased fish oil fatty acids intakes. *Annu Rev Nutr.* 2011 Aug 21;31:203–34.

- 1  
2  
3  
4  
5  
6  
7  
8  
9  
10  
11  
12  
13  
14  
15  
16  
17  
18  
19  
20  
21  
22  
23  
24  
25  
26  
27  
28  
29  
30  
31  
32  
33  
34  
35  
36  
37  
38  
39  
40  
41  
42  
43  
44  
45  
46  
47  
48  
49  
50  
51  
52  
53  
54  
55  
56  
57  
58  
59  
60
25. Cave C, Hein N, Smith LM, Anderson-Berry A, Richter CK, Bisselou KS, et al. Omega-3 Long-Chain Polyunsaturated Fatty Acids Intake by Ethnicity, Income, and Education Level in the United States: NHANES 2003–2014. *Nutrients* [Internet]. 2020 Jul 9 [cited 2020 Oct 27];12(7). Available from: <https://www.ncbi.nlm.nih.gov/pmc/articles/PMC7400855/>
  26. World Health Organization. Joint FAO/WHO Expert Consultation on Fats and Fatty Acids in Human Nutrition [Internet]. 2008. Available from: [http://www.who.int/nutrition/topics/FFA\\_interim\\_recommendations/en/](http://www.who.int/nutrition/topics/FFA_interim_recommendations/en/)
  27. Fats and Fatty Acids in Human Nutrition | Karger Book [Internet]. [cited 2021 Jan 14]. Available from: <https://www.karger.com/Book/Home/251867>
  28. Horne J, Madill J, O'Connor C, Shelley J, Gilliland J. A Systematic Review of Genetic Testing and Lifestyle Behaviour Change: Are We Using High-Quality Genetic Interventions and Considering Behaviour Change Theory? *Lifestyle Genomics*. 2018;11(1):49–63.
  29. Corella D, Ordovás JM. Interactions between dietary *n*-3 fatty acids and genetic variants and risk of disease. *Br J Nutr*. 2012 Jun;107(S2):S271–83.
  30. Grimaldi KA, van Ommen B, Ordovas JM, Parnell LD, Mathers JC, Bendik I, et al. Proposed guidelines to evaluate scientific validity and evidence for genotype-based dietary advice. *Genes Nutr*. 2017 Dec;12(1):35.
  31. Khan KS, Kunz R, Kleijnen J, Antes G. Five steps to conducting a systematic review. *J R Soc Med*. 2003 Mar;96(3):118–21.
  32. PRISMA. PRISMA: Transparent reporting of systematic reviews and meta-analyses [Internet]. 2015. Available from: <http://www.prisma-statement.org/>
  33. Pollock A, Berge E. How to do a systematic review. *Int J Stroke*. 2018 Feb 1;13(2):138–56.
  34. Dekkers OM, Vandenbroucke JP, Cevallos M, Renahan AG, Altman DG, Egger M. COSMOS-E: Guidance on conducting systematic reviews and meta-analyses of observational studies of etiology. *PLoS Med* [Internet]. 2019 Feb 21 [cited 2020 Apr 9];16(2). Available from: <https://www.ncbi.nlm.nih.gov/pmc/articles/PMC6383865/>
  35. Corella D, Ordovás JM. Interactions between dietary *n*-3 fatty acids and genetic variants and risk of disease. *Br J Nutr*. 2012 Jun;107(0 2):S271–83.
  36. GRADE handbook [Internet]. [cited 2020 Sep 29]. Available from: <https://gdt.gradepro.org/app/handbook/handbook.html>
  37. SNiPA - a single nucleotide polymorphisms annotator and browser [Internet]. [cited 2020 Aug 20]. Available from: [https://snipa.helmholtz-muenchen.de/snipa3/index.php?task=proxy\\_search](https://snipa.helmholtz-muenchen.de/snipa3/index.php?task=proxy_search)



- 1  
2  
3  
4  
5  
6  
7  
8  
9  
10  
11  
12  
13  
14  
15  
16  
17  
18  
19  
20  
21  
22  
23  
24  
25  
26  
27  
28  
29  
30  
31  
32  
33  
34  
35  
36  
37  
38  
39  
40  
41  
42  
43  
44  
45  
46  
47  
48  
49  
50  
51  
52  
53  
54  
55  
56  
57  
58  
59  
60
38. Hosseini-Esfahani F, Mirmiran P, Koochakpoor G, Daneshpour MS, Guity K, Azizi F. Some dietary factors can modulate the effect of the zinc transporters 8 polymorphism on the risk of metabolic syndrome. *Sci Rep*. 2017 Dec;7(1):1649.
  39. GRADE handbook [Internet]. [cited 2020 Apr 3]. Available from: <https://gdt.gradepro.org/app/handbook/handbook.html#h.dce0ghnajwsm>
  40. Murad MH, Mustafa RA, Schünemann HJ, Sultan S, Santesso N. Rating the certainty in evidence in the absence of a single estimate of effect. *Evid Based Med*. 2017 Jun;22(3):85–7.
  41. Ma L-L, Wang Y-Y, Yang Z-H, Huang D, Weng H, Zeng X-T. Methodological quality (risk of bias) assessment tools for primary and secondary medical studies: what are they and which is better? *Mil Med Res* [Internet]. 2020 Feb 29 [cited 2020 Sep 2];7. Available from: <https://www.ncbi.nlm.nih.gov/pmc/articles/PMC7049186/>
  42. Chen Y, Estampador AC, Keller M, Poveda A, Dalla-Riva J, Johansson I, et al. The combined effects of FADS gene variation and dietary fats in obesity-related traits in a population from the far north of Sweden: the GLACIER Study. *Int J Obes*. 2019 Apr;43(4):808–20.
  43. Ching YK, Chin YS, Appukutty M, Ramanchadran V, Yu CY, Ang GY, et al. Interaction of Dietary Linoleic Acid and  $\alpha$ -Linolenic Acids with rs174547 in FADS1 Gene on Metabolic Syndrome Components among Vegetarians. *Nutrients*. 2019 Jul 23;11(7):1686.
  44. Dumont J, Huybrechts I, Spinneker A, Gottrand F, Grammatikaki E, Bevilacqua N, et al. FADS1 genetic variability interacts with dietary  $\alpha$ -linolenic acid intake to affect serum non-HDL-cholesterol concentrations in European adolescents. *J Nutr*. 2011 Jul;141(7):1247–53.
  45. Dumont J, Goumidi L, Grenier-Boley B, Cottel D, Marécaux N, Montaye M, et al. Dietary linoleic acid interacts with FADS1 genetic variability to modulate HDL-cholesterol and obesity-related traits. *Clin Nutr*. 2018 Oct 1;37(5):1683–9.
  46. Hellstrand S, Sonestedt E, Ericson U, Gullberg B, Wirfält E, Hedblad B, et al. Intake levels of dietary long-chain PUFAs modify the association between genetic variation in FADS and LDL-C. *J Lipid Res*. 2012 Jun;53(6):1183–9.
  47. Lu Y, Feskens EJ, Dollé ME, Imholz S, Verschuren WM, Müller M, et al. Dietary n–3 and n–6 polyunsaturated fatty acid intake interacts with FADS1 genetic variation to affect total and HDL-cholesterol concentrations in the Doetinchem Cohort Study. *Am J Clin Nutr*. 2010 Jul 1;92(1):258–65.
  48. Standl M, Lattka E, Stach B, Koletzko S, Bauer C-P, von Berg A, et al. FADS1 FADS2 Gene Cluster, PUFA Intake and Blood Lipids in Children: Results from the GINIplus and LISAPLUS Studies. *PLoS ONE* [Internet]. 2012 May 21 [cited 2020 Aug 3];7(5). Available from: <https://www.ncbi.nlm.nih.gov/pmc/articles/PMC3357401/>
  49. Fontaine-Bisson B, Wolever TMS, Chiasson J-L, Rabasa-Lhoret R, Maheux P, Josse RG, et al. Genetic polymorphisms of tumor necrosis factor- $\alpha$  modify the association

1  
2  
3 between dietary polyunsaturated fatty acids and fasting HDL-cholesterol and apo A-I  
4 concentrations. *Am J Clin Nutr.* 2007 Sep;86(3):768–74.  
5

- 6  
7 50. Joffe YT, van der Merwe L, Carstens M, Collins M, Jennings C, Levitt NS, et al. Tumor  
8 Necrosis Factor- $\alpha$  Gene -308 G/A Polymorphism Modulates the Relationship between  
9 Dietary Fat Intake, Serum Lipids, and Obesity Risk in Black South African Women. *J*  
10 *Nutr.* 2010 May 1;140(5):901–7.  
11  
12 51. Joffe YT, van der Merwe L, Evans J, Collins M, Lambert EV, September A, et al. The tumor  
13 necrosis factor- $\alpha$  gene -238 G>A polymorphism, dietary fat intake, obesity risk and  
14 serum lipid concentrations in black and white South African women. *Eur J Clin Nutr.*  
15 2012 Dec;66(12):1295–302.  
16  
17 52. Tai ES, Corella D, Demissie S, Cupples LA, Coltell O, Schaefer EJ, et al. Polyunsaturated  
18 Fatty Acids Interact with the PPARA-L162V Polymorphism to Affect Plasma  
19 Triglyceride and Apolipoprotein C-III Concentrations in the Framingham Heart Study. *J*  
20 *Nutr.* 2005 Mar 1;135(3):397–403.  
21  
22 53. Volcik KA, Nettleton JA, Ballantyne CM, Boerwinkle E. Peroxisome proliferator-activated  
23 receptor [alpha] genetic variation interacts with n-6 and long-chain n-3 fatty acid intake  
24 to affect total cholesterol and LDL-cholesterol concentrations in the Atherosclerosis  
25 Risk in Communities Study. *Am J Clin Nutr.* 2008 Jun;87(6):1926–31.  
26  
27 54. Bouchard-Mercier A, Godin G, Lamarché B, Pérusse L, Vohl M-C. Effects of Peroxisome  
28 Proliferator-Activated Receptors, Dietary Fat Intakes and Gene–Diet Interactions on  
29 Peak Particle Diameters of Low-Density Lipoproteins. *J Nutr Nutr.* 2011;4(1):36–48.  
30  
31 55. Fallaize R, Celis-Morales C, Macready AL, Marsaux CF, Forster H, O'Donovan C, et al. The  
32 effect of the apolipoprotein E genotype on response to personalized dietary advice  
33 intervention: findings from the Food4Me randomized controlled trial. *Am J Clin Nutr.*  
34 2016 Sep;104(3):827–36.  
35  
36 56. Fontaine-Bisson B, Wolever TMS, Connelly PW, Corey PN, El-Sohemy A. NF- $\kappa$ B  
37 -94Ins/Del ATTG polymorphism modifies the association between dietary  
38 polyunsaturated fatty acids and HDL-cholesterol in two distinct populations.  
39 *Atherosclerosis.* 2009 Jun;204(2):465–70.  
40  
41 57. Jang HB, Hwang J-Y, Park JE, Oh JH, Ahn Y, Kang J-H, et al. Intake levels of dietary  
42 polyunsaturated fatty acids modify the association between the genetic variation in  
43 *PCSK5* and HDL cholesterol. *J Med Genet.* 2014 Dec;51(12):782–8.  
44  
45 58. Lai C-Q, Corella D, Demissie S, Cupples LA, Adiconis X, Zhu Y, et al. Dietary Intake of n-6  
46 Fatty Acids Modulates Effect of Apolipoprotein A5 Gene on Plasma Fasting  
47 Triglycerides, Remnant Lipoprotein Concentrations, and Lipoprotein Particle Size: The  
48 Framingham Heart Study. *Circulation.* 2006 May 2;113(17):2062–70.  
49  
50 59. Richardson K, Louie-Gao Q, Arnett DK, Parnell LD, Lai C-Q, Davalos A, et al. The *PLIN4*  
51 Variant rs8887 Modulates Obesity Related Phenotypes in Humans through Creation of a  
52 Novel miR-522 Seed Site. Mailund T, editor. *PLoS ONE.* 2011 Apr 20;6(4):e17944.  
53  
54  
55  
56  
57  
58  
59

- 1  
2  
3  
4  
5  
6  
7  
8  
9  
10  
11  
12  
13  
14  
15  
16  
17  
18  
19  
20  
21  
22  
23  
24  
25  
26  
27  
28  
29  
30  
31  
32  
33  
34  
35  
36  
37  
38  
39  
40  
41  
42  
43  
44  
45  
46  
47  
48  
49  
50  
51  
52  
53  
54  
55  
56  
57  
58  
59  
60
60. Warodomwichit D, Arnett DK, Kabagambe EK, Tsai MY, Hixson JE, Straka RJ, et al. Polyunsaturated Fatty Acids Modulate the Effect of TCF7L2 Gene Variants on Postprandial Lipemia. *J Nutr.* 2009 Mar 1;139(3):439–46.
  61. AlSaleh A, Maniou Z, Lewis FJ, Hall WL, Sanders TAB, O'Dell SD. Genetic predisposition scores for dyslipidaemia influence plasma lipid concentrations at baseline, but not the changes after controlled intake of n-3 polyunsaturated fatty acids. *Genes Nutr.* 2014 Jul;9(4):412.
  62. Harsløf LBS, Damsgaard CT, Hellgren LI, Andersen AD, Vogel U, Lauritzen L. Effects on metabolic markers are modified by PPARG2 and COX2 polymorphisms in infants randomized to fish oil. *Genes Nutr.* 2014 May;9(3):396.
  63. Rudkowska I, Guénard F, Julien P, Couture P, Lemieux S, Barbier O, et al. Genome-wide association study of the plasma triglyceride response to an n-3 polyunsaturated fatty acid supplementation. *J Lipid Res.* 2014 Jul;55(7):1245–53.
  64. Vallée Marcotte B, Guénard F, Cormier H, Lemieux S, Couture P, Rudkowska I, et al. Plasma Triglyceride Levels May Be Modulated by Gene Expression of IQCJ, NXP1, PHF17 and MYB in Humans. *Int J Mol Sci.* 2017 Jan 26;18(2).
  65. Vallée Marcotte B, Guénard F, Lemieux S, Couture P, Rudkowska I, Calder PC, et al. Fine mapping of genome-wide association study signals to identify genetic markers of the plasma triglyceride response to an omega-3 fatty acid supplementation. *Am J Clin Nutr.* 2019 Jan 1;109(1):176–85.
  66. Vallée Marcotte B, Allaire J, Guénard F, de Toro-Martín J, Couture P, Lamarche B, et al. Genetic risk prediction of the plasma triglyceride response to independent supplementations with eicosapentaenoic and docosahexaenoic acids: the COMPARED Study. *Genes Nutr.* 2020 Dec;15(1):10.
  67. Zheng J-S, Chen J, Wang L, Yang H, Fang L, Yu Y, et al. Replication of a Gene-Diet Interaction at CD36, NOS3 and PPARG in Response to Omega-3 Fatty Acid Supplements on Blood Lipids: A Double-Blind Randomized Controlled Trial. *EBioMedicine.* 2018 May;31:150–6.
  68. Vallée Marcotte B, Guénard F, Marquis J, Charpagne A, Vellido-Ortega F, Tejero M, et al. Genetic Risk Score Predictive of the Plasma Triglyceride Response to an Omega-3 Fatty Acid Supplementation in a Mexican Population. *Nutrients.* 2019 Mar 29;11(4):737.
  69. Roke K, Mutch DM. The Role of FADS1/2 Polymorphisms on Cardiometabolic Markers and Fatty Acid Profiles in Young Adults Consuming Fish Oil Supplements. *Nutrients.* 2014 Jun 16;6(6):2290–304.
  70. Cormier H, Rudkowska I, Paradis A-M, Thifault E, Garneau V, Lemieux S, et al. Association between Polymorphisms in the Fatty Acid Desaturase Gene Cluster and the Plasma Triacylglycerol Response to an n-3 PUFA Supplementation. *Nutrients.* 2012 Aug 17;4(8):1026–41.

- 1  
2  
3  
4  
5  
6  
7  
8  
9  
10  
11  
12  
13  
14  
15  
16  
17  
18  
19  
20  
21  
22  
23  
24  
25  
26  
27  
28  
29  
30  
31  
32  
33  
34  
35  
36  
37  
38  
39  
40  
41  
42  
43  
44  
45  
46  
47  
48  
49  
50  
51  
52  
53  
54  
55  
56  
57  
58  
59  
60
71. AbuMweis SS, Panchal SK, Jones PJH. Triacylglycerol-Lowering Effect of Docosahexaenoic Acid Is Not Influenced by Single-Nucleotide Polymorphisms Involved in Lipid Metabolism in Humans. *Lipids*. 2018;53(9):897–908.
  72. Carvalho-Wells AL, Jackson KG, Lockyer S, Lovegrove JA, Minihane AM. APOE genotype influences triglyceride and C-reactive protein responses to altered dietary fat intake in UK adults. *Am J Clin Nutr*. 2012 Dec 1;96(6):1447–53.
  73. Caslake MJ, Miles EA, Kofler BM, Lietz G, Curtis P, Armah CK, et al. Effect of sex and genotype on cardiovascular biomarker response to fish oils: the FINGEN Study. *Am J Clin Nutr*. 2008 Sep 1;88(3):618–29.
  74. Dang TM, Conway V, Plourde M. Disrupted fatty acid distribution in HDL and LDL according to apolipoprotein E allele. *Nutrition*. 2015 Jun 1;31(6):807–12.
  75. Jackson KG, Lockyer S, Carvalho-Wells AL, Williams CM, Minihane AM, Lovegrove JA. Dietary fat manipulation has a greater impact on postprandial lipid metabolism than the apolipoprotein E (epsilon) genotype—insights from the SATgene study. *Mol Nutr Food Res*. 2012;56(12):1761–70.
  76. Jackson KG, Lockyer S, Carvalho-Wells AL, Williams CM, Minihane AM, Lovegrove JA. *Apolipoprotein E (epsilon) genotype has a greater impact on apoB-48 than apoB-100 responses to dietary fat manipulation—insights from the SATgene study*. *Mol Nutr Food Res*. 2017 Apr;61(4):1600688.
  77. Minihane AM, Khan S, Leigh-Firbank EC, Talmud P, Wright JW, Murphy MC, et al. ApoE Polymorphism and Fish Oil Supplementation in Subjects With an Atherogenic Lipoprotein Phenotype. *Arterioscler Thromb Vasc Biol*. 2000 Aug;20(8):1990–7.
  78. Olano-Martin E, Anil E, Caslake MJ, Packard CJ, Bedford D, Stewart G, et al. Contribution of apolipoprotein E genotype and docosahexaenoic acid to the LDL-cholesterol response to fish oil. *Atherosclerosis*. 2010 Mar;209(1):104–10.
  79. Paschos GK, Yiannakouris N, Rallidis LS, Davies I, Griffin BA, Panagiotakos DB, et al. Apolipoprotein E Genotype in Dyslipidemic Patients and Response of Blood Lipids and Inflammatory Markers to Alpha-Linolenic Acid. *Angiology*. 2005 Jan 1;56(1):49–60.
  80. Thifault E, Cormier H, Bouchard-Mercier A, Rudkowska I, Paradis A-M, Garneau V, et al. Effects of Age, Sex, Body Mass Index and APOE Genotype on Cardiovascular Biomarker Response to an n-3 Polyunsaturated Fatty Acid Supplementation. *J Nutr Nutr*. 2013;6(2):73–82.
  81. Madden J, Carrero J, Brunner A, Dastur N, Shearman C, Calder P, et al. Polymorphisms in the CD36 gene modulate the ability of fish oil supplements to lower fasting plasma triacyl glycerol and raise HDL cholesterol concentrations in healthy middle-aged men. *Prostaglandins, Leukotrienes and Essential Fatty Acids*. 2008;78:327–35.
  82. Dawczynski C, Massey KA, Ness C, Kiehntopf M, Stepanow S, Platzer M, et al. Randomized placebo-controlled intervention with n-3 LC-PUFA-supplemented yoghurt: Effects on circulating eicosanoids and cardiovascular risk factors. *Clin Nutr*. 2013 Oct 1;32(5):686–96.

- 1  
2  
3  
4  
5  
6  
7  
8  
9  
10  
11  
12  
13  
14  
15  
16  
17  
18  
19  
20  
21  
22  
23  
24  
25  
26  
27  
28  
29  
30  
31  
32  
33  
34  
35  
36  
37  
38  
39  
40  
41  
42  
43  
44  
45  
46  
47  
48  
49  
50  
51  
52  
53  
54  
55  
56  
57  
58  
59  
60
83. Binia A, Vargas-Martínez C, Ancira-Moreno M, Gosoniu LM, Montoliu I, Gámez-Valdez E, et al. Improvement of cardiometabolic markers after fish oil intervention in young Mexican adults and the role of PPAR $\alpha$  L162V and PPAR $\gamma$ 2 P12A. *J Nutr Biochem*. 2017 May;43:98–106.
  84. Itariu BK, Zeyda M, Hochbrugger EE, Neuhofer A, Prager G, Schindler K, et al. Long-chain n–3 PUFAs reduce adipose tissue and systemic inflammation in severely obese nondiabetic patients: a randomized controlled trial. *Am J Clin Nutr*. 2012 Nov 1;96(5):1137–49.
  85. Lindi V, Schwab U, Louheranta A, Laakso M, Vessby B, Hermansen K, et al. Impact of the Pro12Ala polymorphism of the PPAR- $\gamma$ 2 gene on serum triacylglycerol response to n–3 fatty acid supplementation. *Mol Genet Metab*. 2003 May;79(1):52–60.
  86. Pishva H, Mehdipour P, Eshraghian MR, Mahboob S-A. Effects of Eicosapentaenoic Acid Supplementation on Lipid and Lipoprotein Profile in Hypertriglyceridemic Subjects with Different Proliferator-activated Receptor Alpha Genotypes. :13.
  87. Caron-Dorval D, Paquet P, Paradis A-M, Rudkowska I, Lemieux S, Couture P, et al. Effect of the PPAR-Alpha L162V Polymorphism on the Cardiovascular Disease Risk Factor in Response to n–3 Polyunsaturated Fatty Acids. *J Nutr Nutr*. 2008;1(4):205–12.
  88. Binia A, Vargas-Martínez C, Ancira-Moreno M, Gosoniu LM, Montoliu I, Gámez-Valdez E, et al. Improvement of cardiometabolic markers after fish oil intervention in young Mexican adults and the role of PPAR $\alpha$  L162V and PPAR $\gamma$ 2 P12A. *J Nutr Biochem*. 2017 May;43:98–106.
  89. Dawczynski C, Massey KA, Ness C, Kiehntopf M, Stepanow S, Platzer M, et al. Randomized placebo-controlled intervention with n-3 LC-PUFA-supplemented yoghurt: Effects on circulating eicosanoids and cardiovascular risk factors. *Clin Nutr*. 2013 Oct;32(5):686–96.
  90. Kotze M, Brand T, Pretorius J, J van Rensburg S, Luckhoff HK. Apolipoprotein E epsilon-4 as a genetic determinant of Alzheimer’s disease heterogeneity. *Degener Neurol Neuromuscul Dis*. 2015 Jan;9.
  91. Marais AD. Apolipoprotein E in lipoprotein metabolism, health and cardiovascular disease. *Pathology (Phila)*. 2019 Feb;51(2):165–76.
  92. Kuo C-L, Pilling LC, Atkins JL, Kuchel GA, Melzer D. ApoE e2 and aging-related outcomes in 379,000 UK Biobank participants. *Aging*. 2020 Jun 8;12(12):12222–33.
  93. Nawawi HM, Chua Y-A, Watts GF. The brave new world of genetic testing in the management of the dyslipidaemias. *Curr Opin Cardiol*. 2020;35(3):226–33.
  94. Livingston G, Huntley J, Sommerlad A, Ames D, Ballard C, Banerjee S, et al. Dementia prevention, intervention, and care: 2020 report of the Lancet Commission. *The Lancet*. 2020 Aug;396(10248):413–46.
  95. Dorszewska J, Prendecki M, Oczkowska A, Dezor M, Kozubski W. Molecular Basis of Familial and Sporadic Alzheimer’s Disease. *Curr Alzheimer Res*. 2016;13(9):952–63.

- 1  
2  
3  
4  
5  
6  
7  
8  
9  
10  
11  
12  
13  
14  
15  
16  
17  
18  
19  
20  
21  
22  
23  
24  
25  
26  
27  
28  
29  
30  
31  
32  
33  
34  
35  
36  
37  
38  
39  
40  
41  
42  
43  
44  
45  
46  
47  
48  
49  
50  
51  
52  
53  
54  
55  
56  
57  
58  
59  
60
96. ACCE Model Process for Evaluating Genetic Tests | CDC [Internet]. 2021 [cited 2021 Feb 15]. Available from: <https://www.cdc.gov/genomics/gtesting/acce/index.htm>
  97. Corella D, Coltell O, Portolés O, Sotos-Prieto M, Fernández-Carrión R, Ramirez-Sabio J, et al. A Guide to Applying the Sex-Gender Perspective to Nutritional Genomics. *Nutrients*. 2018 Dec 20;11(1):4.
  98. Dellinger RW, Gomez Garcia AM, Meyskens FL. Differences in the Glucuronidation of Resveratrol and Pterostilbene: Altered Enzyme Specificity and Potential Gender Differences. *Drug Metab Pharmacokinet*. 2014;29(2):112–9.
  99. Vidaver RM, Lafleur B, Tong C, Bradshaw R, Marts SA. Women Subjects in NIH-Funded Clinical Research Literature: Lack of Progress in Both Representation and Analysis by Sex. *J Womens Health Gend Based Med*. 2000 Jun 1;9(5):495–504.
  100. Carvalho-Wells AL, Jackson KG, Lockyer S, Lovegrove JA, Minihane AM. APOE genotype influences triglyceride and C-reactive protein responses to altered dietary fat intake in UK adults. *Am J Clin Nutr*. 2012 Dec 1;96(6):1447–53.
  101. Thifault E, Cormier H, Bouchard-Mercier A, Rudkowska I, Paradis A-M, Garneau V, et al. Effects of Age, Sex, Body Mass Index and APOE Genotype on Cardiovascular Biomarker Response to an n-3 Polyunsaturated Fatty Acid Supplementation. *Lifestyle Genomics*. 2013;6(2):73–82.
  102. Minihane Anne M., Khan Syrah, Leigh-Firbank Elizabeth C., Talmud Philippa, Wright John W., Murphy Margaret C., et al. ApoE Polymorphism and Fish Oil Supplementation in Subjects With an Atherogenic Lipoprotein Phenotype. *Arterioscler Thromb Vasc Biol*. 2000 Aug 1;20(8):1990–7.
  103. Little J, Higgins J, Ioannidis J, Moher D, Gagnon F, von Elm E, et al., editors. STrengthening the REporting of Genetic Association studies (STREGA) - An extension of the STROBE statement. *PLoS Med*. 2009;6(2):e1000022.
  104. Strande NT. Evaluating the Clinical Validity of Gene-Disease Associations: An Evidence-Based Framework Developed by the Clinical Genome Resource. *The American Journal of Human Genetics*. 2017;12.
  105. Ciesielski TH, Pendergrass SA, White MJ, Kodaman N, Sobota RS, Huang M, et al. Diverse convergent evidence in the genetic analysis of complex disease: coordinating omic, informatic, and experimental evidence to better identify and validate risk factors. *BioData Min*. 2014 Dec;7(1):10.
  106. Rudkowska I, Paradis A-M, Thifault E, Julien P, Barbier O, Couture P, et al. Differences in metabolomic and transcriptomic profiles between responders and non-responders to an n-3 polyunsaturated fatty acids (PUFAs) supplementation. *Genes Nutr*. 2013 Jul;8(4):411–23.
  107. Tremblay BL, Cormier H, Rudkowska I, Lemieux S, Couture P, Vohl M-C. Association between polymorphisms in phospholipase A2 genes and the plasma triglyceride response to an n-3 PUFA supplementation: a clinical trial. *Lipids Health Dis*. 2015 Feb 21;14(1):12.

- 1  
2  
3 108. Ouellette C, Cormier H, Rudkowska I, Guénard F, Lemieux S, Couture P, et al.  
4 Polymorphisms in Genes Involved in the Triglyceride Synthesis Pathway and Marine  
5 Omega-3 Polyunsaturated Fatty Acid Supplementation Modulate Plasma Triglyceride  
6 Levels. *Lifestyle Genomics*. 2013;6(4-5):268-80.  
7
- 8 109. Ray-Barruel G, Rickard CM. Helping nurses help PIVCs: decision aids for daily  
9 assessment and maintenance. *Br J Nurs Mark Allen Publ*. 2018 Apr 26;27(8):S12-8.  
10  
11  
12  
13  
14  
15  
16  
17  
18  
19  
20  
21  
22  
23  
24  
25  
26  
27  
28  
29  
30  
31  
32  
33  
34  
35  
36  
37  
38  
39  
40  
41  
42  
43  
44  
45  
46  
47  
48  
49  
50  
51  
52  
53  
54  
55  
56  
57  
58  
59  
60

1  
2  
3  
4  
5  
6  
7  
8  
9  
10  
11  
12  
13  
14  
15  
16  
17  
18  
19  
20  
21  
22  
23  
24  
25  
26  
27  
28  
29  
30  
31  
32  
33  
34  
35  
36  
37  
38  
39  
40  
41  
42  
43  
44  
45  
46  
47

For peer review only



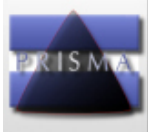

**Figure 1: PRISMA 2009 Flow Diagram**



1  
2  
3  
4  
5  
6  
7  
8  
9  
10  
11  
12  
13  
14  
15  
16  
17  
18  
19  
20  
21  
22  
23  
24  
25  
26  
27  
28  
29  
30  
31  
32  
33  
34  
35  
36  
37  
38  
39  
40  
41  
42  
43  
44  
45  
46  
47  
48  
49  
50  
51  
52  
53  
54  
55  
56  
57  
58  
59  
60

For peer review only

**Supplementary Tables**

***Supplementary Table 1: Search Strategy***

| <b>Embase</b> |                                                                                                                                                                                                                                                                                                                                                                                                                                                                                   |
|---------------|-----------------------------------------------------------------------------------------------------------------------------------------------------------------------------------------------------------------------------------------------------------------------------------------------------------------------------------------------------------------------------------------------------------------------------------------------------------------------------------|
| <b>#</b>      | <b>Search Strategy</b>                                                                                                                                                                                                                                                                                                                                                                                                                                                            |
| 1             | omega-3':ti,ab,kw OR pufa\$:ti,ab,kw OR ((acid* NEAR/5 ('n-3' OR polyunsaturated OR linolenic OR eicosapenta\$noic OR timnodonic OR docosahexa\$noic)):ti,ab,kw) OR docosahexaenoate:ti,ab,kw OR epa:ti,ab,kw OR dha:ti,ab,kw OR ala:ti,ab,kw                                                                                                                                                                                                                                     |
| 2             | omega 3 fatty acid'/exp                                                                                                                                                                                                                                                                                                                                                                                                                                                           |
| <b>3</b>      | <b>#1 OR #2</b>                                                                                                                                                                                                                                                                                                                                                                                                                                                                   |
| 4             | cholesterol*:ti,ab,kw OR hdl:ti,ab,kw OR ldl:ti,ab,kw OR 'high density lipoprotein*':ti,ab,kw OR 'low density lipoprotein*':ti,ab,kw OR 'beta lipoprotein*':ti,ab,kw OR apo*protein*:ti,ab,kw OR apoa:ti,ab,kw OR apob:ti,ab,kw OR apoc:ti,ab,kw OR apod:ti,ab,kw OR apoe:ti,ab,kw OR apoh:ti,ab,kw OR ((apo NEXT/1 (a OR b OR c OR d OR e OR h)):ti,ab,kw) OR triglyceride*:ti,ab,kw OR triacylglycerol*:ti,ab,kw OR (((serum OR plasma) NEXT/1 (lipid* OR tg OR tag)):ti,ab,kw) |
| 5             | cholesterol'/exp OR 'lipoprotein'/exp OR 'triacylglycerol'/exp                                                                                                                                                                                                                                                                                                                                                                                                                    |
| <b>6</b>      | <b>#4 OR #5</b>                                                                                                                                                                                                                                                                                                                                                                                                                                                                   |
| 7             | nutrigenomic*:ti,ab,kw OR nutrigenetic*:ti,ab,kw OR (((nutritional OR expression* OR variation* OR variant*) NEAR/2 (genomic* OR genetic* OR gene OR genes)):ti,ab,kw) OR genotype:ti,ab,kw OR (((('nutrient-gene' OR 'gene-nutrient' OR 'gene-diet') NEXT/1 interaction*)):ti,ab,kw) OR 'personalized nutrition':ti,ab,kw OR 'precision nutrition':ti,ab,kw                                                                                                                      |
| 8             | nutrigenomics'/exp OR 'nutrigenetics'/exp OR 'genetic variation'/exp OR 'genotype'/exp                                                                                                                                                                                                                                                                                                                                                                                            |
| <b>9</b>      | <b>#7 OR #8</b>                                                                                                                                                                                                                                                                                                                                                                                                                                                                   |
| <b>10</b>     | <b>#3 AND #6 AND #9</b>                                                                                                                                                                                                                                                                                                                                                                                                                                                           |
| 11            | [animals]/lim NOT [humans]/lim                                                                                                                                                                                                                                                                                                                                                                                                                                                    |
| <b>12</b>     | <b>#10 NOT #11</b>                                                                                                                                                                                                                                                                                                                                                                                                                                                                |

## Medline (Ovid)

| #  | Search Strategy                                                                                                                                                                                                                                                                                                            |
|----|----------------------------------------------------------------------------------------------------------------------------------------------------------------------------------------------------------------------------------------------------------------------------------------------------------------------------|
| 1  | ("omega-3" or PUFA? or (acid* adj5 ("n-3" or polyunsaturated or linolenic or eicosapenta?noic or timnodonic or docosahexa?noic)) or docosahexaenoate or EPA or DHA or ALA).ab,kf,ti.                                                                                                                                       |
| 2  | exp Fatty Acids, Omega-3/                                                                                                                                                                                                                                                                                                  |
| 3  | <b>1 or 2</b>                                                                                                                                                                                                                                                                                                              |
| 4  | (cholesterol* or HDL or LDL or "high density lipoprotein*" or "low density lipoprotein*" or "beta lipoprotein*" or apo*protein* or apoA or apoB or apoC or apoD or apoE or apoH or (apo adj (A or B or C or D or E or H)) or triglyceride* or triacylglycerol* or ((serum or plasma) adj (lipid* or TG or TAG))).ab,kf,ti. |
| 5  | exp Cholesterol/ or exp Lipoproteins/ or exp Triglycerides/                                                                                                                                                                                                                                                                |
| 6  | <b>4 or 5</b>                                                                                                                                                                                                                                                                                                              |
| 7  | (nutrigenomic* or nutrigenetic* or ((nutritional or expression* or variation* or variant*) adj2 (genomic* or genetic* or gene or genes)) or genotype or (("nutrient-gene" or "gene-nutrient" or "gene-diet") adj interaction*) or "personalized nutrition" or "precision nutrition").ab,kf,ti.                             |
| 8  | Nutrigenomics/ or Genetic Variation/ or Genotype/                                                                                                                                                                                                                                                                          |
| 9  | <b>7 or 8</b>                                                                                                                                                                                                                                                                                                              |
| 10 | <b>3 and 6 and 9</b>                                                                                                                                                                                                                                                                                                       |
| 11 | exp animals/ not humans.sh.                                                                                                                                                                                                                                                                                                |
| 12 | <b>10 not 11</b>                                                                                                                                                                                                                                                                                                           |

## Web of Science

*Indexes = SCI-EXPANDED, SSCI, A&HCI, CPCI-S, CPCI-SSH, ESCI Timespan =All years*

1  
2  
3  
4  
5  
6  
7  
8  
9  
10  
11  
12  
13  
14  
15  
16  
17  
18  
19  
20  
21  
22  
23  
24  
25  
26  
27  
28  
29  
30  
31  
32  
33  
34  
35  
36  
37  
38  
39  
40  
41  
42  
43  
44  
45  
46  
47

| # | Search Strategy                                                                                                                                                                                                                                                                                                                                                                                                                                                                                                                                                                                                                                                                                                                                                                                                                                                                                                                                                                                                                                                                                                                                                                                                                                                                                                                                                                                                                                                                                                                                                                                                                                                                                                                                                                                                                                                                                                                                                                                                                                                                                                                                                                                                                                                                                                                                                                                                                                                                                                                                                                                                                                                                                                                                                                                                                                                                                                                                                       |
|---|-----------------------------------------------------------------------------------------------------------------------------------------------------------------------------------------------------------------------------------------------------------------------------------------------------------------------------------------------------------------------------------------------------------------------------------------------------------------------------------------------------------------------------------------------------------------------------------------------------------------------------------------------------------------------------------------------------------------------------------------------------------------------------------------------------------------------------------------------------------------------------------------------------------------------------------------------------------------------------------------------------------------------------------------------------------------------------------------------------------------------------------------------------------------------------------------------------------------------------------------------------------------------------------------------------------------------------------------------------------------------------------------------------------------------------------------------------------------------------------------------------------------------------------------------------------------------------------------------------------------------------------------------------------------------------------------------------------------------------------------------------------------------------------------------------------------------------------------------------------------------------------------------------------------------------------------------------------------------------------------------------------------------------------------------------------------------------------------------------------------------------------------------------------------------------------------------------------------------------------------------------------------------------------------------------------------------------------------------------------------------------------------------------------------------------------------------------------------------------------------------------------------------------------------------------------------------------------------------------------------------------------------------------------------------------------------------------------------------------------------------------------------------------------------------------------------------------------------------------------------------------------------------------------------------------------------------------------------------|
| 1 | TS=("omega-3" or PUFA\$ or (acid* NEAR/5 ("n-3" or polyunsaturated or linolenic or eicosapenta\$noic or timnodonic or docosahexa\$noic)) or docosahexaenoate or EPA or DHA or ALA)                                                                                                                                                                                                                                                                                                                                                                                                                                                                                                                                                                                                                                                                                                                                                                                                                                                                                                                                                                                                                                                                                                                                                                                                                                                                                                                                                                                                                                                                                                                                                                                                                                                                                                                                                                                                                                                                                                                                                                                                                                                                                                                                                                                                                                                                                                                                                                                                                                                                                                                                                                                                                                                                                                                                                                                    |
| 2 | TS=(cholesterol* or HDL or LDL or "high density lipoprotein*" or "low density lipoprotein*" or "beta lipoprotein*" or apo*protein* or apoA or apoB or apoC or apoD or apoE or apoH or (apo NEAR/0 (A or B or C or D or E or H)) or triglyceride* or triacylglycerol* or ((serum or plasma) NEAR/0 (lipid* or TG or TAG)))                                                                                                                                                                                                                                                                                                                                                                                                                                                                                                                                                                                                                                                                                                                                                                                                                                                                                                                                                                                                                                                                                                                                                                                                                                                                                                                                                                                                                                                                                                                                                                                                                                                                                                                                                                                                                                                                                                                                                                                                                                                                                                                                                                                                                                                                                                                                                                                                                                                                                                                                                                                                                                             |
| 3 | TS=(nutrigenomic* or nutrigenetic* or ((nutritional or expression* or variation* or variant*) NEAR/2 (genomic* or genetic* or gene or genes)) or genotype or (("nutrient-gene" or "gene-nutrient" or "gene-diet") NEAR/0 interaction*) or "personalized nutrition" or "precision nutrition" )                                                                                                                                                                                                                                                                                                                                                                                                                                                                                                                                                                                                                                                                                                                                                                                                                                                                                                                                                                                                                                                                                                                                                                                                                                                                                                                                                                                                                                                                                                                                                                                                                                                                                                                                                                                                                                                                                                                                                                                                                                                                                                                                                                                                                                                                                                                                                                                                                                                                                                                                                                                                                                                                         |
| 4 | <b>#1 AND #2 AND #3</b>                                                                                                                                                                                                                                                                                                                                                                                                                                                                                                                                                                                                                                                                                                                                                                                                                                                                                                                                                                                                                                                                                                                                                                                                                                                                                                                                                                                                                                                                                                                                                                                                                                                                                                                                                                                                                                                                                                                                                                                                                                                                                                                                                                                                                                                                                                                                                                                                                                                                                                                                                                                                                                                                                                                                                                                                                                                                                                                                               |
| 5 | TS=(animals OR animal OR mice OR mus OR mouse OR murine OR woodmouse OR rats OR rat OR murinae OR muridae OR cottonrat OR cottonrats OR hamster OR hamsters OR cricetinae OR rodentia OR rodent OR rodents OR pigs OR pig OR swine OR swines OR piglets OR piglet OR boar OR boars OR "sus scrofa" OR ferrets OR ferret OR polecat OR polecats OR "mustela putorius" OR "guinea pigs" OR "guinea pig" OR cavia OR callithrix OR marmoset OR marmosets OR cebuella OR hapale OR octodon OR chinchilla OR chinchillas OR gerbillinae OR gerbil OR gerbils OR jird OR jirds OR merione OR meriones OR rabbits OR rabbit OR hares OR hare OR diptera OR flies OR fly OR dipteral OR drosophila OR drosophilidae OR cats OR cat OR carus OR felis OR nematoda OR nematode OR nematoda OR nematode OR nematodes OR sipunculida OR dogs OR dog OR canine OR canines OR canis OR sheep OR sheeps OR mouflon OR mouflons OR ovis OR goats OR goat OR capra OR capras OR rupicapra OR chamois OR haplorhini OR monkey OR monkeys OR anthropoidea OR anthropoids OR saguinus OR tamarin OR tamarins OR leontopithecus OR hominidae OR ape OR apes OR pan OR paniscus OR "pan paniscus" OR bonobo OR bonobos OR troglodytes OR "pan troglodytes" OR gibbon OR gibbons OR siamang OR siamangs OR nomascus OR symphalangus OR chimpanzee OR chimpanzees OR prosimians OR "bush baby" OR prosimian OR bush babies OR galagos OR galago OR pongidae OR gorilla OR gorillas OR pongo OR pygmaeus OR "pongo pygmaeus" OR orangutans OR pygmaeus OR lemur OR lemurs OR lemuridae OR horse OR horses OR pongo OR equus OR cow OR calf OR bull OR chicken OR chickens OR gallus OR quail OR bird OR birds OR quails OR poultry OR poultries OR fowl OR fowls OR reptile OR reptilia OR reptiles OR snakes OR snake OR lizard OR lizards OR alligator OR alligators OR crocodile OR crocodiles OR turtle OR turtles OR amphibian OR amphibians OR amphibia OR frog OR frogs OR bombina OR salientia OR toad OR toads OR "epidalea calamita" OR salamander OR salamanders OR eel OR eels OR sciuridae OR squirrel OR squirrels OR chipmunk OR chipmunks OR suslik OR susliks OR vole OR voles OR lemming OR lemmings OR muskrat OR muskrats OR lemmus OR otter OR otters OR marten OR martens OR martes OR weasel OR badger OR badgers OR ermine OR mink OR minks OR sable OR sables OR gulo OR gulos OR wolverine OR wolverines OR minks OR mustela OR llama OR llamas OR alpaca OR alpacas OR camelid OR camelids OR guanaco OR guanacos OR chiroptera OR chiropteras OR bat OR bats OR fox OR foxes OR iguana OR iguanas OR xenopus laevis OR parakeet OR parakeets OR parrot OR parrots OR donkey OR donkeys OR mule OR mules OR zebra OR zebras OR shrew OR shrews OR bison OR bisons OR buffalo OR buffaloes OR deer OR deers OR bear OR bears OR panda OR pandas OR "wild hog" OR "wild boar" OR fitchew OR fitch OR beaver OR beavers OR jerboa OR jerboas OR capybara OR capybaras) |
| 6 | <b>#4 not #5</b>                                                                                                                                                                                                                                                                                                                                                                                                                                                                                                                                                                                                                                                                                                                                                                                                                                                                                                                                                                                                                                                                                                                                                                                                                                                                                                                                                                                                                                                                                                                                                                                                                                                                                                                                                                                                                                                                                                                                                                                                                                                                                                                                                                                                                                                                                                                                                                                                                                                                                                                                                                                                                                                                                                                                                                                                                                                                                                                                                      |

Supplementary Table 2: Summary of observational studies

| Author, Year                     | Study Design                                         | Genetic Approach                       | Population (sample size included in analyses)                                        | Gene(s), SNP(s)                                                                                                                          | Cytogenic Location of Gene(s)                                              | Quantity, Source and Type of Omega-3 <sup>1</sup>                                                                  | Comparators                                                                                                                                                                                   | Plasma Lipid/Lipoprotein Outcome(s) | Summary of Statistically Significant Study Findings Relevant to the Research Question <sup>2</sup>                                                                                                                                                                                                                                                                                                                                                                                                                           |
|----------------------------------|------------------------------------------------------|----------------------------------------|--------------------------------------------------------------------------------------|------------------------------------------------------------------------------------------------------------------------------------------|----------------------------------------------------------------------------|--------------------------------------------------------------------------------------------------------------------|-----------------------------------------------------------------------------------------------------------------------------------------------------------------------------------------------|-------------------------------------|------------------------------------------------------------------------------------------------------------------------------------------------------------------------------------------------------------------------------------------------------------------------------------------------------------------------------------------------------------------------------------------------------------------------------------------------------------------------------------------------------------------------------|
| Bouchard-Mercier et al. 2011 (1) | Cross-Sectional                                      | Single SNP                             | Healthy Caucasian men and women from INFOGENE study (n=674)                          | <i>PPARα</i> , L162V (rs1800206)<br><i>PPARγ</i> , P12A (rs1801282)<br><i>PPARδ</i> , -87T→C (rs2016520)                                 | <i>PPARα</i> : 22q13.31<br><i>PPARγ</i> : 3p25.2<br><i>PPARδ</i> : 6p21.31 | Mean:<br>L162: 2.8 g/day<br>V162: 2.9 g/day<br>(unclear if food and/or supplement sources)                         | Minor allele carriers vs. Non-carriers                                                                                                                                                        | LDL-PPD                             | <b>LDL-PPD:</b> In a model including age, sex, TG, BMI, energy and omega-3 intakes and <i>PPARα</i> L162V (rs1800206) polymorphism, the interaction of <i>PPARα</i> 162V and omega-3 intakes explained 0.62% of the variance in LDL-PPD.                                                                                                                                                                                                                                                                                     |
| Bodhini et al. 2017 (2)          | Cross-Sectional                                      | Single SNP                             | Adults with normal glucose tolerance (n=821) and adults with type 2 diabetes (n=861) | <i>MC4R</i> , rs17782313<br><i>TCF7L2</i> , rs12255372<br><i>TCF7L2</i> , rs7903146                                                      | <i>MC4R</i> : 18q21.32<br><i>TCF7L2</i> : 10q25.2-q25.3                    | <b>Low:</b> 0.38 g/day ALA<br><b>Moderate:</b> 0.58 g/day ALA<br><b>High:</b> 0.89 g/day ALA (means) (food)        | Major allele homozygotes vs. Minor allele carriers                                                                                                                                            | HDL-c                               | <b>HDL-c:</b> 'T' allele carriers of <i>TCF7L2</i> rs12255372 within the lowest tertile of ALA intake (mean=0.38 g/day) exhibited higher levels of HDL-c compared to GG homozygotes in the lowest tertile of ALA intake (mean=0.38 g/day)                                                                                                                                                                                                                                                                                    |
| Chen et al. 2019 (3)             | Cross-Sectional Analysis within a Prospective Cohort | Single SNP, Haplotype and Gene-Centric | Adults of Swedish ancestry from the GLACIER cohort (n=5160)                          | All variations in the <i>FADS1-FADS2-FADS3</i> gene cluster and variation within 200kb upstream and downstream of the <i>FADS</i> region | <i>FADS1</i> : 11q12.2<br><i>FADS2</i> : 11q12.2<br><i>FADS3</i> : 11q12.2 | <b>High:</b> >1.6 g/day<br><b>Low:</b> <1.6 g/day (food)                                                           | Entire <i>FADS</i> region gene-centric analysis and Variation in individual <i>FADS</i> cluster SNPs: rs174570, rs174602, rs74771917, rs3168072, rs12577276, rs7115739 and Haplotype analysis | HDL-c<br>LDL-c<br>TG<br>Total-c     | <b>HDL-c:</b> Significant interaction of rs174570 and omega-3 on HDL-c<br><b>LDL-c:</b> Significant interaction of rs174602 and omega-3 on LDL-c<br><b>TG:</b> Gene-centric analyses demonstrated a significant interaction between variation in the <i>FADS</i> gene cluster and omega-3 intake on TG<br><b>Total-c:</b> Significant interaction of rs174602 and omega-3 on total-c ('C' allele carriers exhibited lower total-c with low omega-3 intake, while no such relationship was observed with high omega-3 intake) |
| Ching et al. 2019 (4)            | Cross-Sectional                                      | Single SNP                             | Vegetarian adults of Malaysian ancestry (n=200)                                      | <i>FADS1</i> , rs174547                                                                                                                  | <i>FADS1</i> : 11q12.2                                                     | <b>Low:</b> ≤0.45 g/day ALA<br><b>Moderate:</b> 0.46-0.64 g/day ALA<br><b>High:</b> >0.64 g/day ALA (means) (food) | Comparison between three genotypes                                                                                                                                                            | HDL-c<br>TG                         | <b>HDL-c:</b> The TT genotype had significantly lower HDL-c when ALA intake was in the moderate intake range, but there were no significant gene-omega-3 interaction on lipid levels                                                                                                                                                                                                                                                                                                                                         |
| Dumont et al. 2011 (5)           | Cross-Sectional                                      | Single SNP                             | Adolescents of European ancestry (n=573)                                             | <i>FADS1</i> , rs174547                                                                                                                  | <i>FADS1</i> : 11q12.2                                                     | <b>High:</b> >1.4 g/day ALA<br><b>Low:</b> ≤1.4 g/day ALA<br>(unclear if food and/or supplement sources)           | Major allele homozygotes vs. Minor allele carriers                                                                                                                                            | HDL-c<br>LDL-c<br>TG<br>Total-c     | <b>Total-c:</b> Significant interaction whereby the minor allele (CT+TT genotype) was associated with lower total-c when ALA intake is high as compared to when intake is low. This remained significant after assessing the interaction using ALA intake as a continuous variable.                                                                                                                                                                                                                                          |

|                                                          |                                        |                                                                                       |               |                                                                                                 |                                                             |                                         |                                                                                                                                                                                                                                                  |                                                                                                                            |                                 |                                                                                                                                                                                                                                                                                                                                                                                                                                                                                                                                                                                                               |
|----------------------------------------------------------|----------------------------------------|---------------------------------------------------------------------------------------|---------------|-------------------------------------------------------------------------------------------------|-------------------------------------------------------------|-----------------------------------------|--------------------------------------------------------------------------------------------------------------------------------------------------------------------------------------------------------------------------------------------------|----------------------------------------------------------------------------------------------------------------------------|---------------------------------|---------------------------------------------------------------------------------------------------------------------------------------------------------------------------------------------------------------------------------------------------------------------------------------------------------------------------------------------------------------------------------------------------------------------------------------------------------------------------------------------------------------------------------------------------------------------------------------------------------------|
| 1<br>2<br>3<br>4<br>5<br>6<br>7<br>8<br>9                | Dumont et al. 2018 (6)                 | Cross-Sectional                                                                       | Single SNP    | Men and women aged 35 to 74 years from the MONA LISA Study of three French populations (n=3069) | <i>FADS1</i> , rs174547                                     | <i>FADS1</i> : 11q12.2                  | <b>Low:</b> 0.6 g/day ALA (mean)<br><b>Median:</b> 0.8 g/day ALA (stratified by median for analyses)<br><b>High:</b> 1.3 g/day ALA (mean) (food and supplement)                                                                                  | Comparison between three genotypes                                                                                         | HDL-c<br>LDL-c<br>TG<br>Total-c | --                                                                                                                                                                                                                                                                                                                                                                                                                                                                                                                                                                                                            |
| 10<br>11<br>12<br>13<br>14<br>15<br>16<br>17<br>18       | Fallaize et al. 2016 (7)               | Cross-Sectional (Baseline) and Longitudinal Analyses within a Randomized Intervention | Single SNP*   | Healthy adults enrolled in the Food4Me European trial (n=1466)                                  | <i>APOE</i> , rs429358, rs7412                              | <i>APOE</i> : 19q13.32                  | <b>High:</b> >0.67 %kcal<br><b>Low:</b> <0.67 %kcal<br><b>Increased Intake:</b> reduced omega-3 intake from baseline<br><b>Decreased Intake:</b> decreased omega-3 intake from baseline (unclear if food and/or supplement sources)              | <i>APOE</i> -E4 vs. <i>APOE</i> -E4+                                                                                       | Total-c                         | <b>Total-c:</b> Cross-sectional (baseline) analysis demonstrated a significant genotype effect for <i>APOE</i> , omega-3 intake, and total-c. Longitudinal analysis (baseline to month 6) demonstrated a significant genotype effect for <i>APOE</i> , change in omega-3 intake (increase or decrease) and total-c.                                                                                                                                                                                                                                                                                           |
| 19<br>20<br>21<br>22<br>23<br>24                         | Fontaine-Bisson and El-Sohemy 2007 (8) | Cross-Sectional                                                                       | Genetic Score | Men and women aged 20-29 years (n=595)                                                          | <i>TNF<math>\alpha</math></i> , rs361525, rs1800629         | <i>TNF<math>\alpha</math></i> : 6p21.33 | Intake range: 0.2-4.6 %kcal (mean intakes were 0.7 %kcal for 0/0, 0.7% kcal for 0/1 and 0.6%kcal for 1/0) (food)                                                                                                                                 | No minor allele ('A') for both SNPs (0/0) vs. One minor allele for rs361525 (1/0) vs. One minor allele for rs1800625 (0/1) | HDL-c                           | --                                                                                                                                                                                                                                                                                                                                                                                                                                                                                                                                                                                                            |
| 25<br>26<br>27<br>28                                     | Fontaine-Bisson et al. 2009 (9)        | Cross-Sectional                                                                       | Single SNP    | Healthy men and women aged 20-29 years (n=593)                                                  | <i>NF-<math>\kappa</math>B</i> -94Ins/Del ATTG (rs28362491) | <i>NF-<math>\kappa</math>B</i> : 4q24   | Mean intake: 0.7 %kcal (unclear if food and/or supplement sources)                                                                                                                                                                               | Ins/Ins vs. Ins/Del vs. Del/Del                                                                                            | HDL-c                           | <b>HDL-c:</b> Significant interaction between <i>NF-<math>\kappa</math>B</i> genotype and omega-3 intake on HDL-c                                                                                                                                                                                                                                                                                                                                                                                                                                                                                             |
| 29<br>30<br>31<br>32<br>33<br>34<br>35<br>36<br>37<br>38 | Hellstrand et al. 2012 (10)            | Cross-Sectional                                                                       | Single SNP    | Healthy men and women aged 45-68 years from Sweden (n=4635)                                     | <i>FADS</i> , rs174547                                      | <i>FADS</i> : 11q12.2                   | <b>Low:</b> $\leq$ 0.14 %kcal long-chain omega-3<br><b>Moderate:</b> 0.14-0.28 %kcal long-chain omega-3<br><b>High:</b> >0.28 %kcal long-chain omega-3 (tertiles of intake reported only for certain significant findings) (food and supplement) | TT vs. TC vs. CC                                                                                                           | HDL-c<br>LDL-c<br>TG            | <b>LDL-c:</b> Significant interaction between <i>FADS</i> rs174547 genotype and long-chain omega-3 on LDL-c whereby the 'C' allele was significantly associated with lower LDL-c when long-chain omega-3 intake was in the lowest tertile (but not in the moderate or highest tertile). High long-chain omega-3 intake was associated with significantly higher LDL-c for CC and TC genotypes but not TT genotypes. Stratified analysis based on sex demonstrated that these significant interactions remained for men, but not women, however there was not a significant difference in interactions by sex. |
| 39<br>40<br>41<br>42<br>43<br>44<br>45<br>46<br>47       | Hosseini-Esfahani et al. 2017 (11)     | Nested Case-Control                                                                   | Single SNP    | Healthy men and women aged $\geq$ 18 years from Iran                                            | <i>ZNF8</i> , rs13266634                                    | <i>ZNF8</i> : 8q24.11                   | <b>Tertiles for omega-3:</b><br><b>Low:</b> <0.38 %kcal<br><b>Moderate:</b> 0.38-                                                                                                                                                                | CC vs. CT+TT                                                                                                               | HDL-c<br>TG                     | <b>HDL-c:</b> Significant interaction between <i>ZNF8</i> rs13266634 genotype and omega-3 intake on the risk of low HDL-c whereby CC genotypes exhibited a decreased risk of low HDL-c with increasing intake of omega-3; this was not observed in                                                                                                                                                                                                                                                                                                                                                            |

|                        |                 |            |                                                                                                                     |                                                                                            |                        |                                                                                                                                                                                                                                                                                     |                                                                                          |                                                  |                                                                                                                                                                                                                                                                                                                                                                                                                                                                                                                                                                                                                                                                                                                                                                                                                                                                                                         |
|------------------------|-----------------|------------|---------------------------------------------------------------------------------------------------------------------|--------------------------------------------------------------------------------------------|------------------------|-------------------------------------------------------------------------------------------------------------------------------------------------------------------------------------------------------------------------------------------------------------------------------------|------------------------------------------------------------------------------------------|--------------------------------------------------|---------------------------------------------------------------------------------------------------------------------------------------------------------------------------------------------------------------------------------------------------------------------------------------------------------------------------------------------------------------------------------------------------------------------------------------------------------------------------------------------------------------------------------------------------------------------------------------------------------------------------------------------------------------------------------------------------------------------------------------------------------------------------------------------------------------------------------------------------------------------------------------------------------|
|                        |                 |            | (n=1634)                                                                                                            |                                                                                            |                        | 0.54 %kcal<br><b>High:</b> >0.54 %kcal (food)                                                                                                                                                                                                                                       |                                                                                          |                                                  | the CT+TT genotype group.<br><b>TG:</b> Significant interaction between <i>ZNF78</i> rs13266634 genotype and omega-3 intake on the risk of high TG whereby CC genotypes exhibited a decreased risk of high TG with increasing intake of omega-3; this was not exhibited in the CT+TT genotype group.                                                                                                                                                                                                                                                                                                                                                                                                                                                                                                                                                                                                    |
| Jang et al. 2014 (12)  | Cross-Sectional | Single SNP | Adult: Men and women aged 40-69 from Korea (n=4205)<br>Children: Boys and girls aged 8-13 years from Korea (n=1548) | <i>PCSK5</i> , rs1029035                                                                   | <i>PCSK5</i> : 9q21.13 | Based on overall median intake (further detailed elsewhere (12)):<br><b>Low:</b> <0.4 %kcal (food)<br><b>High:</b> >0.4 %kcal (food)                                                                                                                                                | CC vs. CA vs. AA                                                                         | HDL-c                                            | <b>HDL-c:</b> Significant interaction between <i>PCSK5</i> rs1029035 and omega-3 on HDL-c in male children and male adults. 'C' allele carriers exhibit a tendency to decrease HDL-c with omega-3, while AA genotypes exhibit the opposite effect.                                                                                                                                                                                                                                                                                                                                                                                                                                                                                                                                                                                                                                                      |
| Joffe et al. 2010 (13) | Cross-Sectional | Single SNP | Black women from South Africa, normal weight or with obesity (n=138)                                                | <i>TNFA</i> , rs1800629                                                                    | <i>TNFA</i> : 6p21.33  | ALA (amount not reported/cannot determine) (food)                                                                                                                                                                                                                                   | GG vs. GA+AA                                                                             | HDL-c<br>LDL-c<br>TG<br>Total-c<br>Total-c:HDL-c | <b>Total-c:HDL-c ratio:</b> Significant interaction between <i>TNFA</i> , rs1800629 genotypes and %kcal from ALA whereby increasing %kcal from ALA was associated with increases in Total-c:HDL-c for GG genotypes but decreases in Total-c:HDL-c ratio for GA+AA genotypes                                                                                                                                                                                                                                                                                                                                                                                                                                                                                                                                                                                                                             |
| Joffe et al. 2012 (14) | Cross-Sectional | Single SNP | Black and white women from South Africa, normal weight or with obesity (n=263)                                      | <i>TNFA</i> , rs361525                                                                     | <i>TNFA</i> : 6p21.33  | <b>Median Intakes:</b><br>omega-3: 0.28-0.36 % kcal<br>ALA: 0.21-0.26 %kcal<br>EPA: 0.02 %kcal<br>DHA: 0.04-0.08 %kcal (food)                                                                                                                                                       | GG vs. GA(+AA for one participant: black, normal weight)                                 | HDL-c<br>LDL-c<br>TG<br>Total-c<br>Total-c:HDL-c | <b>LDL-c:</b> Significant interaction for Caucasian women whereby LDL-c decreased with increasing %kcal from EPA in the GG genotype but not the GA genotype of <i>TNFA</i> , rs361525.<br><b>Total-c:</b> Significant interaction for white women whereby total-c decreased with increasing EPA and DHA intakes in the GG genotype group but not the GA genotype group of <i>TNFA</i> rs361525 but individual rates were not significant.<br><b>Total-c:HDL-c ratio:</b> Significant interaction for black women whereby Total-c:HDL-c decreased within increasing %kcal from omega-3 in the GA genotype group but not GG of <i>TNFA</i> rs361525.                                                                                                                                                                                                                                                      |
| Joffe et al. 2014 (15) | Cross-Sectional | Single SNP | Black and white women from South Africa, normal weight or with obesity (n=268)                                      | <i>IL-6</i> , -174 G>C, IVS3 (rs1800795), +281 G>T, IVS4 (rs1554606), +869 A>G (rs2069845) | <i>IL-6</i> : 7p15.3   | Black Women (%kcal/day): 0.28 omega-3, 0.21 ALA, 0.02 EPA, 0.04 DHA (normal weight); 0.36 omega-3, 0.22 ALA, 0.04 EPA, 0.08 DHA (obesity)<br>White Women (%kcal/day): 0.33 omega-3, 0.26 ALA, 0.01 EPA, 0.05 DHA (normal weight); 0.32 omega-3, 0.25 ALA, 0.02 EPA, 0.05 DHA (food) | Major allele homozygotes vs. Minor allele carriers or Comparison between three genotypes | HDL-c<br>LDL-c<br>TG<br>Total-c<br>Total-c:HDL-c | The following results were statistically significant only in white women, but not in black women:<br><b>HDL-c:</b> Significant interaction whereby HDL-c increased with increasing omega-3 and/or DHA and/or ALA intake in <i>IL-6</i> rs1800795 C allele carriers and increasing ALA intake in <i>IL-6</i> rs1554606 T allele carriers. HDL-c decreased with increasing EPA and/or DHA intake in <i>IL-6</i> rs2069845 G allele carriers.<br><b>TG:</b> Significant interaction whereby TG reduced with increasing EPA intake in <i>IL-6</i> rs1800795 C allele carriers<br><b>Total-c:HDL-c:</b> Significant interaction whereby total-c:HDL-c ratio decreased with increasing EPA intake in <i>IL-6</i> rs1800795 CC genotypes and <i>IL-6</i> rs1554606 TT genotypes, increasing DHA intake in <i>IL-6</i> rs1800795 CC genotypes, and increasing ALA intake in <i>IL-6</i> rs1554606 TT genotypes. |
| Lai et al. 2006 (16)   | Cross-Sectional | Single SNP | Men and women from the Framingham                                                                                   | <i>APOA5</i> , rs662799, rs651821, rs3135506,                                              | <i>APOA5</i> : 11q23.3 | <b>Mean Intake:</b> 0.69 %kcal omega-3<br><b>Tertiles for</b>                                                                                                                                                                                                                       | Major allele homozygotes vs. Minor allele carriers                                       | TG                                               | --                                                                                                                                                                                                                                                                                                                                                                                                                                                                                                                                                                                                                                                                                                                                                                                                                                                                                                      |



|                             |                                                                                                                         |            |                                                                                  |                                                                                        |                          |                                                                                                                                                                              |                                                        |                                 |                                                                                                                                                                                                                                                                                                                                                        |
|-----------------------------|-------------------------------------------------------------------------------------------------------------------------|------------|----------------------------------------------------------------------------------|----------------------------------------------------------------------------------------|--------------------------|------------------------------------------------------------------------------------------------------------------------------------------------------------------------------|--------------------------------------------------------|---------------------------------|--------------------------------------------------------------------------------------------------------------------------------------------------------------------------------------------------------------------------------------------------------------------------------------------------------------------------------------------------------|
|                             |                                                                                                                         |            | Heart Study (n=2148)                                                             | rs2072560, rs2266788                                                                   |                          | <b>omega-3:</b><br><b>Low:</b> <0.58 %kcal<br><b>Moderate:</b> 0.58-0.74 %kcal<br><b>High:</b> >0.74 %kcal<br>(unclear if food and/or supplement sources)                    |                                                        |                                 |                                                                                                                                                                                                                                                                                                                                                        |
| Lu et al. 2010 (17)         | Cross-Sectional                                                                                                         | Single SNP | Men and women of Doetinchem Cohort Study (n=3575)                                | <i>FADS</i> , rs174546, rs482548, rs174570                                             | <i>FADS</i> : 11q12.2    | Mean intake: 0.5 %kcal (food)                                                                                                                                                | Comparison between three genotypes                     | HDL-c<br>Total-c                | <b>Total -c:</b> In high omega-3 intake group, total-c was significantly higher with each added minor 'C' allele of rs174546                                                                                                                                                                                                                           |
| Nettleton et al. 2009 (18)  | Cross-Sectional                                                                                                         | Single SNP | Men and women of Caucasian ancestry (n=8511)                                     | <i>ANGPTL4</i> E40K (rs116843064)                                                      | <i>ANGPTL4</i> : 19p13.2 | Not Reported/Cannot Determine (food)                                                                                                                                         | Minor allele carriers vs. Non-allele carriers          | HDL-c<br>TG                     | --                                                                                                                                                                                                                                                                                                                                                     |
| Richardson et al. 2011 (19) | Meta-analysis of the Framingham Offspring Study (FOS) and the Genetics of Lipid Lowering Drugs and Diet Network (GOLDN) | Single SNP | Men and women from FOS and GOLDN studies (n=3605)                                | <i>PLIN4</i> , rs8887, rs11673616, rs892158, rs7250947, rs8102428, rs1609717, rs884164 | <i>PLIN4</i> : 19p13.3   | Mean intakes:<br><b>FOS Men:</b> 1.43 g/d<br><b>FOS Women:</b> 1.37 g/d<br><b>GOLDN Men:</b> 1.83 g/d<br><b>GOLDN Women:</b> 1.48 g/d (food and supplement)                  | Minor allele carriers vs. Non-allele carriers          | TG<br>HDL-c                     | <b>TG:</b> Significant interactions for <i>PLIN4</i> , rs884164 whereby TG levels increased in minor allele carriers with higher omega-3 intake for males and females combined, and males individually.                                                                                                                                                |
| Standl et al. 2012 (20)     | Cross-Sectional Analysis (10-year time point) within a 10-year longitudinal cohort study                                | Single SNP | 10 year-old children of the GINIplus and LISApplus birth cohort studies (n=1697) | <i>FADS1/FADS2</i> , rs174545, rs174546, rs174556, rs174561, rs174575, rs3834458       | <i>FADS1/2</i> : 11q12.2 | Median intake: 0.14 mg/MJ omega-3 (ALA+EPA+DPA+DHA) (food and supplement)                                                                                                    | Comparison between three genotypes                     | HDL-c<br>LDL-c<br>Total-c<br>TG | --                                                                                                                                                                                                                                                                                                                                                     |
| Tai et al. 2005 (21)        | Cross-Sectional                                                                                                         | Single SNP | Framingham Cohort, men and women (n=2106)                                        | <i>PPARα</i> , L162V (rs1800206)                                                       | <i>PPARα</i> : 22q13.31  | <b>High:</b> >0.69 %kcal<br><b>Low:</b> <0.69 %kcal (food)                                                                                                                   | <i>PPARα</i> : 162V carriers vs. 162L/162L homozygotes | TG<br>apoC-III                  | <b>TG:</b> 167V carriers had lower TG with high omega-3 intake compared to low omega-3 intake (gene-diet-interaction effects were NS)<br><b>apoC-III:</b> Significant gene-diet interactions; Higher apoC-III in 162V carriers with low omega-3 intake compared to 162V carriers with high omega-3 intake and 162L homozygotes with low omega-3 intake |
| Volcik et al. 2008 (22)     | Cross-Sectional (Baseline) Analysis within a Prospective Cohort                                                         | Single SNP | African American (n=3480) and Caucasian (n=10 134) men and women (N=13,614)      | <i>PPARα</i> , L162V (rs1800206), 3'UTR G>A (rs6008259), 3'UTR C>T (rs3892755)         | <i>PPARα</i> : 22q13.31  | African American:<br><b>High:</b> >0.32 g/d EPA+DHA<br><b>Low:</b> ≤0.32 g/d EPA+DHA<br>Caucasian:<br><b>High:</b> >0.22 g/d EPA+DHA<br><b>Low:</b> ≤0.22 g/d EPA+DHA (food) | Comparison between three genotypes for each SNP        | HDL-c<br>LDL-c<br>TG<br>Total-c | <b>Total-c, LDL-c:</b> African Americans (but not Caucasians) homozygous for <i>PPARα</i> (rs3892755) TT genotype with high EPA+DHA intake had significantly lower total-c and LDL-c compared to CT and TT genotypes (both high and low EPA+DHA intake)                                                                                                |

|                              |                                                        |            |                                       |                                     |                              |                                            |                                                    |                                                        |    |
|------------------------------|--------------------------------------------------------|------------|---------------------------------------|-------------------------------------|------------------------------|--------------------------------------------|----------------------------------------------------|--------------------------------------------------------|----|
| Warodomwich et al. 2009 (23) | Cross-sectional with fasting and postprandial measures | Single SNP | Men and women of GOLDN study (n=1083) | <i>TCF7L2</i> rs7903146, rs12255372 | <i>TCF7L2</i> : 10q25.2-25.3 | N/A (Median omega-3: 0.67% of kcal) (food) | Major allele homozygotes vs. Minor allele carriers | HDL-c<br>LDL-c<br>LDL-c particle size<br>TG<br>Total-c | -- |
|------------------------------|--------------------------------------------------------|------------|---------------------------------------|-------------------------------------|------------------------------|--------------------------------------------|----------------------------------------------------|--------------------------------------------------------|----|

ALA: alpha-linolenic acid, Apo: apolipoprotein, DHA: docosahexaenoic acid, EPA: eicosapentaenoic acid, HDL: high-density lipoprotein cholesterol, LDL: low-density lipoprotein cholesterol, N/A: not applicable, NS: Non-significant, sdLDL-c: small, dense, low-density lipoprotein cholesterol, SNP: single nucleotide polymorphism, TG: triglycerides

1. Intakes are total omega-3 unless otherwise specified

2. All other (not listed) gene/omega-3/lipid/lipoprotein results of interest to the present review were NS

Participants are described as “healthy” for studies that incorporated exclusion criteria for certain conditions, blood lipid levels, etc. and when studies described the population as “healthy.”

3. These results were taken from the full-text manuscript’s summary table of IL-6 results. Refer to Supplementary Tables S8-S13 in Joffe et al. 2014 (15) for several other significant results, stratified and un-stratified by ethnicity. Note: There were no corrections for multiple testing in the statistical analyses.

'--' indicates that all of the completed gene/omega-3/lipid/lipoprotein analyses were NS

\*Human *APOE* is polymorphic at two single nucleotides (rs429358 and rs7412) resulting in three different alleles (ε2, ε3 and ε4)

Supplementary Table 3: Summary of interventional studies

| Author, Year              | Study Design                                  | Genetic Approach         | Population (sample size included in analyses)               | Intervention Duration | Gene(s), SNP(s)                                                                                                                                                                                                                                                                                                                                                             | Cytogenic Location of Gene(s)                                                                                                                                                                                                                                                                                                               | Quantity, Source and Type of Omega-3                                                                                                          | Comparators                                                                                                                                                                                                                                 | Plasma Lipid/Lipoprotein Outcome(s)              | Summary of Statistically Significant Study Findings Relevant to the Research Question <sup>1</sup>                                                                                          |
|---------------------------|-----------------------------------------------|--------------------------|-------------------------------------------------------------|-----------------------|-----------------------------------------------------------------------------------------------------------------------------------------------------------------------------------------------------------------------------------------------------------------------------------------------------------------------------------------------------------------------------|---------------------------------------------------------------------------------------------------------------------------------------------------------------------------------------------------------------------------------------------------------------------------------------------------------------------------------------------|-----------------------------------------------------------------------------------------------------------------------------------------------|---------------------------------------------------------------------------------------------------------------------------------------------------------------------------------------------------------------------------------------------|--------------------------------------------------|---------------------------------------------------------------------------------------------------------------------------------------------------------------------------------------------|
| AbuMweis et al. 2018 (24) | Randomized, Crossover Controlled Intervention | Single SNP*              | Adults with at least one cardiovascular risk factor (n=129) | 4 weeks               | <i>FADS1</i> , rs174561<br><i>FADS2</i> , rs174583<br><i>ELOVL2</i> , rs953413<br><i>ELOVL5</i> , rs2397142<br><i>CETP</i> , rs5882<br><i>SCD1</i> , rs2234970,<br><i>PPARA</i> , rs6008259<br><i>LIPF</i> , rs814628<br><br>and<br><i>APOE</i> , rs429358, rs7412                                                                                                          | <i>FADS1/2</i> : 11q12.2<br><i>ELOVL2</i> : 6p24.2<br><i>ELOVL5</i> : 6p12.1<br><i>CETP</i> : 16q13<br><i>SCD1</i> : 10q24.31<br><i>PPARA</i> : 22q13.31<br><i>LIPF</i> : 10q23.31<br><i>APOE</i> : 19q13.32                                                                                                                                | Intake range: 1.0 – 2.5 g/day DHA (supplement)                                                                                                | Comparison between three genotypes for each single SNP (except <i>PPARA</i> and <i>LIPF</i> whereby analyses were major allele homozygotes vs. minor allele carriers)<br><br>and<br><i>APOE</i> -E2 vs. <i>APOE</i> -E3 vs. <i>APOE</i> -E4 | apoA1<br>apoB<br>HDL-c<br>LDL-c<br>TG<br>Total-c | --                                                                                                                                                                                          |
| Alsaleh et al. 2014 (25)  | Randomized Controlled Intervention            | Single SNP and Polygenic | Healthy men and women (n=310)                               | 12 months             | <i>CETP</i> , rs3764261,<br><i>LIPC</i> , rs1532085<br><i>APOB</i> , rs1367117<br><i>ABCG5/ABCG</i> , rs4299376<br><i>TIMD4/HAVCR1</i> , rs6882076<br><i>GCKR</i> , rs1260326<br><i>TRIB1</i> , rs2954029<br><i>ANGPTL3/DOCK7</i> , rs2131925<br><i>FADS1/2/3</i> , rs174546<br><i>GALNT2</i> , rs4846914<br><i>ABCA1</i> , rs4149268<br><i>APOE/APOC1/APOC2</i> , rs439401 | <i>CETP</i> : 16q13<br><i>LIPC</i> : 15q21.3<br><i>APOB</i> : 2p24.1<br><i>ABCG5/ABCG8</i> : 2p.21<br><i>TIMD4/HAVCR1</i> : 5q33.3<br><i>GCKR</i> : 2p23.3<br><i>TRIB1</i> : 8q24.13<br><i>ANGPTL3/DOCK7</i> : 7: 1p31.3<br><i>FADS</i> : 11q12.2<br><i>GALNT2</i> : 1q42.13<br><i>ABCA1</i> : 9q31.1<br><i>APOE/APOC1/APOC2</i> : 19q13.32 | <b>Low Dose:</b> 0.5 g/day EPA and DHA<br><b>Moderate Dose:</b> 0.9 g/day EPA and DHA<br><b>High Dose:</b> 1.8 g/day EPA and DHA (supplement) | Effect sizes per GRS risk allele after omega-3 treatment and Risk allele carriers vs. non-risk allele carriers                                                                                                                              | HDL-c<br>LDL-c<br>TG<br>Total-c                  | <b>TG:</b> significant interaction whereby 1.8 g/day EPA and DHA significantly reduced TG in T allele carriers (21.6% reduction) vs. CC genotypes (3.5% reduction) of <i>FADS1</i> rs174546 |

1  
2  
3  
4  
5  
6  
7  
8  
9  
10  
11  
12  
13  
14  
15  
16  
17  
18  
19  
20  
21  
22  
23  
24  
25  
26  
27  
28  
29  
30  
31  
32  
33  
34  
35  
36  
37  
38  
39  
40  
41  
42  
43  
44  
45  
46  
47

|                                   |                                                          |                                    |                                                |         |                                                                                                                                                                                                          |                                                                                                                                                                                |                                                                                                                    |                                                                                                                                           |                                                                                                                     |                                                                                                                                                                                                                                                                                                                                                                                                                                                                                                                           |
|-----------------------------------|----------------------------------------------------------|------------------------------------|------------------------------------------------|---------|----------------------------------------------------------------------------------------------------------------------------------------------------------------------------------------------------------|--------------------------------------------------------------------------------------------------------------------------------------------------------------------------------|--------------------------------------------------------------------------------------------------------------------|-------------------------------------------------------------------------------------------------------------------------------------------|---------------------------------------------------------------------------------------------------------------------|---------------------------------------------------------------------------------------------------------------------------------------------------------------------------------------------------------------------------------------------------------------------------------------------------------------------------------------------------------------------------------------------------------------------------------------------------------------------------------------------------------------------------|
| Armstrong et al. 2012 (26)        | Double-Blind, Placebo-Controlled Randomized Intervention | Single SNP (deletion polymorphism) | Healthy adults of African ancestry (n=98)      | 6 weeks | <i>ALOX5</i> , dd (33, 34 or 44), d5 (35, 45) and 55 (control) genotypes                                                                                                                                 | <i>ALOX5</i> : 10q11.21                                                                                                                                                        | Fish oil: 5.0 g/day containing 2.0 g/day EPA and 1.0 g/day DHA<br>Control oil: 5.0 g/day corn/soy oil (supplement) | dd vs. d5 vs. 55                                                                                                                          | TG<br>Mean lipoprotein particle diameter, total number of particles and particle concentration for: HDL-c and LDL-c | <b>TG</b> : significant interaction whereby decreases in TG from omega-3 supplementation were specific to d5 genotype group<br><b>HDL-c particle concentration</b> : significant decrease with omega-3 intervention in the d5 and 55 genotype groups compared to placebo, but no decreases in the dd genotype group<br><b>Medium HDL-c particles and HDL-c (mmol/L)</b> : significant gene-treatment interaction but no significant differences after post-hoc analysis for comparisons among genotypes                   |
| Binia et al. 2017 (27)            | Single-Arm Clinical Trial                                | Single SNP                         | Mexican adults 18-40 years (n=191)             | 6 weeks | <i>PPARA</i> , L162V (rs1800206), <i>PPARγ2</i> , P12A (rs1801282)                                                                                                                                       | <i>PPARA</i> : 22q13.31<br><i>PPARγ2</i> : 3p25.2                                                                                                                              | Fish oil: 2.7 g/day containing 1.9 g/d EPA and 0.8 g/day DHA (supplement)                                          | Major allele homozygotes vs. Minor allele carriers                                                                                        | HDL-c<br>LDL-c<br>TG<br>Total-c                                                                                     | <b>LDL-c</b> : significant increase in LDL-c among minor allele carriers ( <i>PPARγ2</i> Pro12Ala and Ala12Ala) only vs. <i>PPARγ2</i> Pro12Pro genotypes only for individuals with BMI>25.0 kg/m <sup>2</sup><br><b>Total-c</b> : significant increase in total-c among minor allele carriers ( <i>PPARγ2</i> Pro12Ala and Ala12Ala) only vs. <i>PPARγ2</i> Pro12Pro genotypes only for individuals with BMI>25.0 kg/m <sup>2</sup>                                                                                      |
| Bouchard Mercier et al. 2013 (28) | Single Arm Clinical Trial                                | Single SNP                         | Healthy adults aged 18-50 years (n=208)        | 6 weeks | <i>SREBF1</i> , rs4925115, rs4925118, rs12953299<br><i>ACLY</i> , rs8071753, rs8065502, rs2304497<br><i>ACACA</i> rs2017571, rs29221368, rs9906044, rs2229416, rs1714987, rs1266175, rs3815059, rs829165 | <i>SREBF1</i> : 17p11.2<br><i>ACLY</i> : 17q21.2<br><i>ACACA</i> : 17q12                                                                                                       | Fish oil: 5.0 g/day containing 1.9-2.2 g/day EPA and 1.1 g/day DHA (supplement)                                    | Major allele homozygotes vs. Minor allele carriers<br>or<br>Comparison between three genotypes (when minor allele frequencies were >0.05) | TG                                                                                                                  | <b>TG</b> : Significant gene-diet interaction whereby individuals with the GG genotype of <i>ACLY</i> rs8071753 and individuals with the GG or CG genotype of <i>ACACA</i> rs1714987 exhibited greater TG lower effects following omega-3 supplementation; these two SNPs explained approximately 8% of the variance in plasma TG responses to omega-3 supplementation. There were significant differences in genotype frequencies of <i>ACLY</i> rs8071753 for responders and non-responders to omega-3 for TG lowering. |
| Bouchard-Mercier et al. 2014 (29) | Single Arm Clinical Trial                                | Single SNP                         | Healthy men and women aged 18-50 years (n=208) | 6 weeks | <i>RXRα</i> (12 SNPs), <i>CPT1A</i> (9 SNPs), <i>ACADVL</i> (1 SNP), <i>ACAA2</i> (6 SNPs), <i>ABCD2</i> (8 SNPs), <i>ACOX1</i> (8 SNPs), <i>ACAA1</i> (3 SNPs) [outlined in Supplementary Table 5]      | <i>RXRα</i> : 9q34.2<br><i>CPT1A</i> : 11q13.3<br><i>ACADVL</i> : 17p13.1<br><i>ACAA2</i> : 18q21.1<br><i>ABCD2</i> : 12q12<br><i>ACOX1</i> : 17q25.1<br><i>ACAA1</i> : 3p22.2 | Fish oil: 5.0 g/day containing 1.9-2.2 g/day EPA and 1.1 g/day DHA (supplement)                                    | Major allele homozygotes vs. Minor allele carriers<br>or<br>Comparison between three genotypes (when minor allele frequencies were >0.05) | TG                                                                                                                  | <b>TG</b> : There were significant gene-diet interaction effects on TG responses to omega-3 for <i>RXRα</i> rs11185660 genotype dependent on total fat intake, <i>RXRα</i> rs10881576, rs12339187 and rs11185660 genotypes dependent on saturated fat intake, and <i>ACOX1</i> rs17583163 dependent on total polyunsaturated fat intake                                                                                                                                                                                   |
| Bouchard-Mercier et al. 2014 (30) | Single Arm Clinical Trial                                | Single SNP                         | Healthy men and women aged 18-50 years (n=208) | 6 weeks | <i>GCK</i> (13 SNPs) [outlined in Supplementary Table 5]                                                                                                                                                 | <i>GCK</i> : 7p13                                                                                                                                                              | Fish oil: 5.0 g/day containing 1.9-2.2 g/day EPA and 1.1 g/day DHA (supplement)                                    | Major allele homozygotes vs. Minor allele carriers<br>or<br>Comparison between three genotypes                                            | TG                                                                                                                  | <b>TG</b> : CC genotypes of <i>GCK</i> rs741038 exhibited significantly greater TG reduction in response to omega-3 when their carbohydrate intake was high (>48.6%kcal) compared to those with the CC genotype of rs741038 with low carbohydrate intake (≤48.6%kcal) and compared to CT or TT genotypes with either high or low carbohydrate intake.                                                                                                                                                                     |

|    |                                 |                                                                      |             |                                                              |                  |                                                                        |                         |                                                                                                                                                                                                                                                                                                            |                                                                                  |                                                                        |                                                                                                                                                                                                                                                                                                     |
|----|---------------------------------|----------------------------------------------------------------------|-------------|--------------------------------------------------------------|------------------|------------------------------------------------------------------------|-------------------------|------------------------------------------------------------------------------------------------------------------------------------------------------------------------------------------------------------------------------------------------------------------------------------------------------------|----------------------------------------------------------------------------------|------------------------------------------------------------------------|-----------------------------------------------------------------------------------------------------------------------------------------------------------------------------------------------------------------------------------------------------------------------------------------------------|
| 3  |                                 |                                                                      |             |                                                              |                  |                                                                        |                         | (when minor allele frequencies were >0.05)                                                                                                                                                                                                                                                                 |                                                                                  |                                                                        |                                                                                                                                                                                                                                                                                                     |
| 4  |                                 |                                                                      |             |                                                              |                  |                                                                        |                         |                                                                                                                                                                                                                                                                                                            |                                                                                  |                                                                        |                                                                                                                                                                                                                                                                                                     |
| 5  |                                 |                                                                      |             |                                                              |                  |                                                                        |                         |                                                                                                                                                                                                                                                                                                            |                                                                                  |                                                                        |                                                                                                                                                                                                                                                                                                     |
| 6  | Caron-Dorval et al. 2008 (31)   | Single Arm Clinical Trial                                            | Single SNP  | Healthy men of Caucasian ancestry aged 18-55 years (n=28)    | 6 weeks          | <i>PPARα</i> , L162V (rs1800206)                                       | <i>PPARα</i> : 22q13.31 | Fish oil: 5.0 g/day containing 1.9 g/day EPA and 1.1 g/day DHA (supplement)                                                                                                                                                                                                                                | V162 carriers vs. non-carriers                                                   | apoB-100<br>HDL-c<br>LDL-c<br>TG<br>Total-c<br>Total-C:HDL-c           | --                                                                                                                                                                                                                                                                                                  |
| 7  |                                 |                                                                      |             |                                                              |                  |                                                                        |                         |                                                                                                                                                                                                                                                                                                            |                                                                                  |                                                                        |                                                                                                                                                                                                                                                                                                     |
| 8  |                                 |                                                                      |             |                                                              |                  |                                                                        |                         |                                                                                                                                                                                                                                                                                                            |                                                                                  |                                                                        |                                                                                                                                                                                                                                                                                                     |
| 9  |                                 |                                                                      |             |                                                              |                  |                                                                        |                         |                                                                                                                                                                                                                                                                                                            |                                                                                  |                                                                        |                                                                                                                                                                                                                                                                                                     |
| 10 |                                 |                                                                      |             |                                                              |                  |                                                                        |                         |                                                                                                                                                                                                                                                                                                            |                                                                                  |                                                                        |                                                                                                                                                                                                                                                                                                     |
| 11 |                                 |                                                                      |             |                                                              |                  |                                                                        |                         |                                                                                                                                                                                                                                                                                                            |                                                                                  |                                                                        |                                                                                                                                                                                                                                                                                                     |
| 12 |                                 |                                                                      |             |                                                              |                  |                                                                        |                         |                                                                                                                                                                                                                                                                                                            |                                                                                  |                                                                        |                                                                                                                                                                                                                                                                                                     |
| 13 |                                 |                                                                      |             |                                                              |                  |                                                                        |                         |                                                                                                                                                                                                                                                                                                            |                                                                                  |                                                                        |                                                                                                                                                                                                                                                                                                     |
| 14 | Carvalho-Wells et al. 2012 (32) | Sequential Non-Randomized, Cross-Over Dietary Intervention           | Single SNP* | Healthy men and women aged 35-70 years (n=88)                | 8 weeks per diet | <i>APOE</i> , rs429358, rs7412                                         | <i>APOE</i> : 19q13.32  | <b>Low-Fat:</b><br>4.0 mg/day EPA, 10.6 mg/d DPA, 11.7 mg/d DHA<br><b>High-SFA:</b><br>20.2 mg/d EPA, 27.1 mg/d DPA, 15.4 mg/d DHA<br><b>High-SFA+DHA:</b><br>524.3 mg/d EPA, 215.5 mg/d DPA, 3017.3 mg/d DHA [actual intakes reported (33)] (supplemental DHA for High-SFA+DHA; others from food sources) | <i>APOE</i> -E3/3 vs. <i>APOE</i> -E3/4                                          | apoB<br>apoC-III<br>apoE<br>HDL-c<br>LDL-c<br>sdLDL-c<br>TG<br>Total-c | <b>TG:</b> Significant diet x genotype interaction for TG; greater TG lowering response to high-SFA+DHA diet in <i>APOE</i> -E3/4 carriers (compared to high-SFA diet alone)                                                                                                                        |
| 15 |                                 |                                                                      |             |                                                              |                  |                                                                        |                         |                                                                                                                                                                                                                                                                                                            |                                                                                  |                                                                        |                                                                                                                                                                                                                                                                                                     |
| 16 |                                 |                                                                      |             |                                                              |                  |                                                                        |                         |                                                                                                                                                                                                                                                                                                            |                                                                                  |                                                                        |                                                                                                                                                                                                                                                                                                     |
| 17 |                                 |                                                                      |             |                                                              |                  |                                                                        |                         |                                                                                                                                                                                                                                                                                                            |                                                                                  |                                                                        |                                                                                                                                                                                                                                                                                                     |
| 18 |                                 |                                                                      |             |                                                              |                  |                                                                        |                         |                                                                                                                                                                                                                                                                                                            |                                                                                  |                                                                        |                                                                                                                                                                                                                                                                                                     |
| 19 |                                 |                                                                      |             |                                                              |                  |                                                                        |                         |                                                                                                                                                                                                                                                                                                            |                                                                                  |                                                                        |                                                                                                                                                                                                                                                                                                     |
| 20 |                                 |                                                                      |             |                                                              |                  |                                                                        |                         |                                                                                                                                                                                                                                                                                                            |                                                                                  |                                                                        |                                                                                                                                                                                                                                                                                                     |
| 21 |                                 |                                                                      |             |                                                              |                  |                                                                        |                         |                                                                                                                                                                                                                                                                                                            |                                                                                  |                                                                        |                                                                                                                                                                                                                                                                                                     |
| 22 |                                 |                                                                      |             |                                                              |                  |                                                                        |                         |                                                                                                                                                                                                                                                                                                            |                                                                                  |                                                                        |                                                                                                                                                                                                                                                                                                     |
| 23 | Caslake et al. 2008 (34)        | Double-Blind, Randomized, Placebo-Controlled, Crossover Intervention | Single SNP* | Healthy men and women aged 20-70 years (n=312)               | 8 weeks per diet | <i>APOE</i> , rs429358, rs7412                                         | <i>APOE</i> : 19q13.32  | Control oil: 0.0 g/d EPA and DHA<br>Fish oil: 0.7 g/d EPA and DHA<br>Fish oil: 1.8 g/d EPA and DHA (supplement)                                                                                                                                                                                            | <i>APOE</i> -E2/E2 + E2/E3 vs. <i>APOE</i> -E3/E3 vs. <i>APOE</i> -E3/E4 + E4/E4 | HDL-c<br>LDL-c<br>TG<br>Total-c                                        | <b>TG:</b> Significant interaction between treatment x sex x genotype whereby <i>APOE</i> -E3/E4 + E4/E4 males exhibited the greatest TG reductions with both 0.7 g/d EPA and DHA as well as 1.8 g/d EPA and DHA compared to other genotypes                                                        |
| 24 |                                 |                                                                      |             |                                                              |                  |                                                                        |                         |                                                                                                                                                                                                                                                                                                            |                                                                                  |                                                                        |                                                                                                                                                                                                                                                                                                     |
| 25 |                                 |                                                                      |             |                                                              |                  |                                                                        |                         |                                                                                                                                                                                                                                                                                                            |                                                                                  |                                                                        |                                                                                                                                                                                                                                                                                                     |
| 26 |                                 |                                                                      |             |                                                              |                  |                                                                        |                         |                                                                                                                                                                                                                                                                                                            |                                                                                  |                                                                        |                                                                                                                                                                                                                                                                                                     |
| 27 |                                 |                                                                      |             |                                                              |                  |                                                                        |                         |                                                                                                                                                                                                                                                                                                            |                                                                                  |                                                                        |                                                                                                                                                                                                                                                                                                     |
| 28 | Cormier et al. 2012 (35)        | Single Arm Clinical Trial                                            | Single SNP  | Healthy men and women aged 18-50 years (n=208)               | 6 weeks          | <i>FADS</i> gene cluster (19 SNPs) [outlined in Supplementary Table 5] | <i>FADS</i> : 11q12.2   | Fish oil: 5.0 g/day containing 1.9 g/day EPA and 1.1 g/day DHA (supplement)                                                                                                                                                                                                                                | Major allele homozygotes vs. Minor allele carriers                               | TG                                                                     | --                                                                                                                                                                                                                                                                                                  |
| 29 |                                 |                                                                      |             |                                                              |                  |                                                                        |                         |                                                                                                                                                                                                                                                                                                            |                                                                                  |                                                                        |                                                                                                                                                                                                                                                                                                     |
| 30 |                                 |                                                                      |             |                                                              |                  |                                                                        |                         |                                                                                                                                                                                                                                                                                                            |                                                                                  |                                                                        |                                                                                                                                                                                                                                                                                                     |
| 31 |                                 |                                                                      |             |                                                              |                  |                                                                        |                         |                                                                                                                                                                                                                                                                                                            |                                                                                  |                                                                        |                                                                                                                                                                                                                                                                                                     |
| 32 | Dang et al. 2015 (36)           | Single Arm Clinical Trial                                            | Single SNP* | Healthy men and women aged 20-35 years (n=80)                | 4 weeks          | <i>APOE</i> , rs429358, rs7412                                         | <i>APOE</i> : 19q13.32  | Fish oil containing 900 mg EPA and 680 mg DHA (supplement)                                                                                                                                                                                                                                                 | <i>APOE</i> -E4+ vs. <i>APOE</i> -E4-                                            | HDL-c<br>LDL-c<br>TG<br>Total-c                                        | --                                                                                                                                                                                                                                                                                                  |
| 33 |                                 |                                                                      |             |                                                              |                  |                                                                        |                         |                                                                                                                                                                                                                                                                                                            |                                                                                  |                                                                        |                                                                                                                                                                                                                                                                                                     |
| 34 |                                 |                                                                      |             |                                                              |                  |                                                                        |                         |                                                                                                                                                                                                                                                                                                            |                                                                                  |                                                                        |                                                                                                                                                                                                                                                                                                     |
| 35 |                                 |                                                                      |             |                                                              |                  |                                                                        |                         |                                                                                                                                                                                                                                                                                                            |                                                                                  |                                                                        |                                                                                                                                                                                                                                                                                                     |
| 36 |                                 |                                                                      |             |                                                              |                  |                                                                        |                         |                                                                                                                                                                                                                                                                                                            |                                                                                  |                                                                        |                                                                                                                                                                                                                                                                                                     |
| 37 | Dawczynski et al. 2013 (37)     | Randomized, Placebo-Controlled, Double-Blind Intervention            | Single SNP  | Men and women with TG ≥ 1.7 mmol/L, otherwise healthy (n=47) | 10 weeks         | <i>CD36</i> , rs1761667, rs1049673                                     | <i>CD36</i> : 7q21.11   | Yogurt with lower dose fish oil: 0.8g/day omega-3 containing 0.01g ALA, 0.44g EPA, 0.06g DPA and 0.31g DHA (fish oil)<br><br>Yogurt with higher dose fish oil: 3.0 g/day omega-3                                                                                                                           | Comparison between three genotypes                                               | HDL-c<br>TG                                                            | <b>HDL-c:</b> In response to omega-3 supplementation (0.8-3.0 g/day), HDL-c increased in GA genotype of <i>CD36</i> rs1761667 and CG genotype of <i>CD36</i> rs1049673.<br><b>TG:</b> In response to omega-3 supplementation (0.8-3.0 g/day), TG decreased in GA genotype of <i>CD36</i> rs1761667. |
| 38 |                                 |                                                                      |             |                                                              |                  |                                                                        |                         |                                                                                                                                                                                                                                                                                                            |                                                                                  |                                                                        |                                                                                                                                                                                                                                                                                                     |
| 39 |                                 |                                                                      |             |                                                              |                  |                                                                        |                         |                                                                                                                                                                                                                                                                                                            |                                                                                  |                                                                        |                                                                                                                                                                                                                                                                                                     |
| 40 |                                 |                                                                      |             |                                                              |                  |                                                                        |                         |                                                                                                                                                                                                                                                                                                            |                                                                                  |                                                                        |                                                                                                                                                                                                                                                                                                     |
| 41 |                                 |                                                                      |             |                                                              |                  |                                                                        |                         |                                                                                                                                                                                                                                                                                                            |                                                                                  |                                                                        |                                                                                                                                                                                                                                                                                                     |

1  
2  
3  
4  
5  
6  
7  
8  
9  
10  
11  
12  
13  
14  
15  
16  
17  
18  
19  
20  
21  
22  
23  
24  
25  
26  
27  
28  
29  
30  
31  
32  
33  
34  
35  
36  
37  
38  
39  
40  
41  
42  
43  
44  
45  
46  
47

|                           |                                                                 |                              |                                                                                         |                                  |                                                                                                      |                                                 |                                                                                                                                                           |                                                                                                                                                                                                                                                                                            |                                                                                             |                                                                                                                                                                                                                                                                                                                                                                      |
|---------------------------|-----------------------------------------------------------------|------------------------------|-----------------------------------------------------------------------------------------|----------------------------------|------------------------------------------------------------------------------------------------------|-------------------------------------------------|-----------------------------------------------------------------------------------------------------------------------------------------------------------|--------------------------------------------------------------------------------------------------------------------------------------------------------------------------------------------------------------------------------------------------------------------------------------------|---------------------------------------------------------------------------------------------|----------------------------------------------------------------------------------------------------------------------------------------------------------------------------------------------------------------------------------------------------------------------------------------------------------------------------------------------------------------------|
|                           |                                                                 |                              |                                                                                         |                                  |                                                                                                      |                                                 | containing 0.07g ALA, 1.59g EPA, 0.23g DPA and 1.12g DHA (fish oil)<br><br>Control yogurt: commercial whole fruit yogurt with 3.5% milk fat<br><br>(food) |                                                                                                                                                                                                                                                                                            |                                                                                             |                                                                                                                                                                                                                                                                                                                                                                      |
| Ferguson et al. 2010 (38) | Randomized Intervention and Cross-Sectional (Baseline) Analysis | Single SNP                   | Men and women with metabolic syndrome from LIPGENE cohort (n=450)                       | 12 weeks                         | NOS3, rs11771443, rs1800783, rs1800779, rs1799983, rs3918227, rs743507                               | NOS3: 7q36.1                                    | 1.24 g/d EPA+DHA supplement (intervention); quantity of omega-3 not reported for observational analyses                                                   | Major allele homozygotes vs. Minor allele carriers                                                                                                                                                                                                                                         | apoA-I<br>apoB<br>apoB-48<br>apoC-II<br>apoC-III<br>apoE<br>HDL-c<br>LDL-c<br>TG<br>Total-c | TG: For NOS3 rs1799983 minor-allele (A) carriers only, the observational analysis indicated higher TG with lower EPA+DHA intake (and lower TG with higher EPA+DHA intake). Post-intervention with omega-3 supplementation indicated that only minor-allele (A) carriers exhibited significant TG reduction (accompanied by increases in plasma omega-3).             |
| Harsløf et al. 2014 (39)  | Randomized, Controlled Intervention                             | Single SNP and Genetic Score | Infants of Danish ancestry (n=133)                                                      | 9 months                         | PPARγ2, Pro12Ala (rs1801282), FADS1, rs1535, FADS2, rs174575, FADS3, rs174448 COX2, rs5275, rs689466 | PPARγ2: 3p25.2 FADS: 11q12.2 COX2: 1q25.2-q25.3 | 5.0 mL/day fish oil (median reported intake: 3.8 g/day containing 630 mg/day EPA and 620 mg/day DHA) (supplement)                                         | PPARγ2 genotype analyses were by major allele homozygotes vs. heterozygotes<br><br>and<br><br>FADS genotype analyses were by the number of DHA-increasing alleles<br><br>and<br><br>COX2 genotype analyses were by major allele homozygotes vs. heterozygotes vs. minor allele homozygotes | HDL-c<br>LDL-c<br>TG<br>Total-c                                                             | TG: PPARγ2 heterozygotes exhibited reduced TG in response to omega-3 when compared to PPARγ2 heterozygotes in the control (sunflower oil) group                                                                                                                                                                                                                      |
| Itariu et al. 2012 (40)   | Randomized, Controlled Intervention                             | Single SNP                   | Men and women without diabetes with a BMI ≥40 kg/m <sup>2</sup> aged 20-65 years (n=55) | 8 weeks                          | PPARγ2, Pro12Ala (rs1801282)                                                                         | PPARγ2: 3p25.2                                  | Fish oil containing 3.4 g/day EPA + DHA (supplement)                                                                                                      | PPARγ2, Ala12 carriers vs. Pro12Pro                                                                                                                                                                                                                                                        | apoB<br>HDL-c<br>LDL-c<br>TG<br>Total-c                                                     | apoB: Significant increases in apoB with omega-3 intervention in Ala12 carriers when compared to Pro12 carriers.<br><br>Total-c: Significant interaction effect whereby increases in total-c were exhibited with omega-3 intervention in Ala12 carriers when compared to the Pro12Pro genotype.                                                                      |
| Jackson et al. 2012 (41)  | Non-Randomized Intervention                                     | Single SNP*                  | Healthy men aged 35-70 years (n=23)                                                     | 8 weeks and 480-min postprandial | APOE, rs429358, rs7412                                                                               | APOE: 19q13.32                                  | Fish oil containing 3.45 g/day DHA (supplement)                                                                                                           | APOE-E3/3 vs. APOE-E3/4                                                                                                                                                                                                                                                                    | apoB<br>apoC-III<br>apoE<br>HDL-c<br>LDL-c<br>TG                                            | TG: APOE-E3/E4 exhibited reduced fasting TG in response to a high saturated fat + DHA intervention when compared to the high saturated fat diet alone. There was also a significant interaction (meal x time x genotype) for the postprandial TG lowering response whereby APOE-E3/4 consuming a high saturated fat + DHA intervention exhibited significantly lower |

|    |                           |                                     |             |                                                                     |                      |                                                                                                                                                             |                                                                                                                          |                                                                                                                                                                                 |                                                                                                                                  |                                                                                                                                       |                                                                                                                                                                                                                                                                                                                                                                                                                                                                                                                                                                                                                                                                                                                                                                                               |
|----|---------------------------|-------------------------------------|-------------|---------------------------------------------------------------------|----------------------|-------------------------------------------------------------------------------------------------------------------------------------------------------------|--------------------------------------------------------------------------------------------------------------------------|---------------------------------------------------------------------------------------------------------------------------------------------------------------------------------|----------------------------------------------------------------------------------------------------------------------------------|---------------------------------------------------------------------------------------------------------------------------------------|-----------------------------------------------------------------------------------------------------------------------------------------------------------------------------------------------------------------------------------------------------------------------------------------------------------------------------------------------------------------------------------------------------------------------------------------------------------------------------------------------------------------------------------------------------------------------------------------------------------------------------------------------------------------------------------------------------------------------------------------------------------------------------------------------|
| 3  |                           |                                     |             |                                                                     |                      |                                                                                                                                                             |                                                                                                                          |                                                                                                                                                                                 | Total-c                                                                                                                          | postprandial TG, TG area under the curve, and TG maximum concentration compared to those consuming the high saturated fat diet alone. |                                                                                                                                                                                                                                                                                                                                                                                                                                                                                                                                                                                                                                                                                                                                                                                               |
| 4  |                           |                                     |             |                                                                     |                      |                                                                                                                                                             |                                                                                                                          |                                                                                                                                                                                 |                                                                                                                                  |                                                                                                                                       |                                                                                                                                                                                                                                                                                                                                                                                                                                                                                                                                                                                                                                                                                                                                                                                               |
| 5  | Jackson et al. 2017 (42)  | Non-Randomized Intervention         | Single SNP* | Healthy men aged 35-70 years (n=23)                                 | 480-min postprandial | <i>APOE</i> , rs429358, rs7412                                                                                                                              | <i>APOE</i> : 19q13.32                                                                                                   | Fish oil containing 3.45 g/day DHA (supplement)                                                                                                                                 | <i>APOE</i> -E3/3 vs. <i>APOE</i> -E3/4                                                                                          | apoB-48 apoB-100                                                                                                                      | --                                                                                                                                                                                                                                                                                                                                                                                                                                                                                                                                                                                                                                                                                                                                                                                            |
| 6  |                           |                                     |             |                                                                     |                      |                                                                                                                                                             |                                                                                                                          |                                                                                                                                                                                 |                                                                                                                                  |                                                                                                                                       |                                                                                                                                                                                                                                                                                                                                                                                                                                                                                                                                                                                                                                                                                                                                                                                               |
| 7  | Lindi et al. 2003 (43)    | Randomized Intervention             | Single SNP  | Healthy men and women aged 30-65 years (n=150)                      | 3 months             | <i>PPAR</i> $\gamma$ 2, Pro12Ala (rs1801282)                                                                                                                | <i>PPAR</i> $\gamma$ 2: 3p25.2                                                                                           | Fish oil containing 2.4 g/d EPA + DHA (supplement)                                                                                                                              | <i>PPAR</i> $\gamma$ 2, Ala12 carriers vs. Pro12Pro                                                                              | HDL-c LDL-c TG Total-c                                                                                                                | <b>TG:</b> Compared to Pro12Pro, Ala12 carriers exhibited significantly greater TG reductions in response to omega-3 supplementation only when total fat intake was $\leq$ 37 %kcal or SFA intake was $\leq$ 10 %kcal                                                                                                                                                                                                                                                                                                                                                                                                                                                                                                                                                                         |
| 8  |                           |                                     |             |                                                                     |                      |                                                                                                                                                             |                                                                                                                          |                                                                                                                                                                                 |                                                                                                                                  |                                                                                                                                       |                                                                                                                                                                                                                                                                                                                                                                                                                                                                                                                                                                                                                                                                                                                                                                                               |
| 9  |                           |                                     |             |                                                                     |                      |                                                                                                                                                             |                                                                                                                          |                                                                                                                                                                                 |                                                                                                                                  |                                                                                                                                       |                                                                                                                                                                                                                                                                                                                                                                                                                                                                                                                                                                                                                                                                                                                                                                                               |
| 10 |                           |                                     |             |                                                                     |                      |                                                                                                                                                             |                                                                                                                          |                                                                                                                                                                                 |                                                                                                                                  |                                                                                                                                       |                                                                                                                                                                                                                                                                                                                                                                                                                                                                                                                                                                                                                                                                                                                                                                                               |
| 11 |                           |                                     |             |                                                                     |                      |                                                                                                                                                             |                                                                                                                          |                                                                                                                                                                                 |                                                                                                                                  |                                                                                                                                       |                                                                                                                                                                                                                                                                                                                                                                                                                                                                                                                                                                                                                                                                                                                                                                                               |
| 12 |                           |                                     |             |                                                                     |                      |                                                                                                                                                             |                                                                                                                          |                                                                                                                                                                                 |                                                                                                                                  |                                                                                                                                       |                                                                                                                                                                                                                                                                                                                                                                                                                                                                                                                                                                                                                                                                                                                                                                                               |
| 13 | Lindman et al. (44)       | Randomized, Controlled Intervention | Single SNP  | Men at high risk of cardiovascular disease aged 65-75 years (n=204) | 6 months             | <i>FVII</i> , rs6046                                                                                                                                        | <i>FVII</i> : 13q34                                                                                                      | Fish oil containing 2.4 g/d EPA + DHA<br><br>Dietary advice including recommendations to increase omega-3 (supplement and food)                                                 | Major allele homozygotes vs. Minor allele carriers                                                                               | TG                                                                                                                                    | --                                                                                                                                                                                                                                                                                                                                                                                                                                                                                                                                                                                                                                                                                                                                                                                            |
| 14 |                           |                                     |             |                                                                     |                      |                                                                                                                                                             |                                                                                                                          |                                                                                                                                                                                 |                                                                                                                                  |                                                                                                                                       |                                                                                                                                                                                                                                                                                                                                                                                                                                                                                                                                                                                                                                                                                                                                                                                               |
| 15 |                           |                                     |             |                                                                     |                      |                                                                                                                                                             |                                                                                                                          |                                                                                                                                                                                 |                                                                                                                                  |                                                                                                                                       |                                                                                                                                                                                                                                                                                                                                                                                                                                                                                                                                                                                                                                                                                                                                                                                               |
| 16 |                           |                                     |             |                                                                     |                      |                                                                                                                                                             |                                                                                                                          |                                                                                                                                                                                 |                                                                                                                                  |                                                                                                                                       |                                                                                                                                                                                                                                                                                                                                                                                                                                                                                                                                                                                                                                                                                                                                                                                               |
| 17 |                           |                                     |             |                                                                     |                      |                                                                                                                                                             |                                                                                                                          |                                                                                                                                                                                 |                                                                                                                                  |                                                                                                                                       |                                                                                                                                                                                                                                                                                                                                                                                                                                                                                                                                                                                                                                                                                                                                                                                               |
| 18 |                           |                                     |             |                                                                     |                      |                                                                                                                                                             |                                                                                                                          |                                                                                                                                                                                 |                                                                                                                                  |                                                                                                                                       |                                                                                                                                                                                                                                                                                                                                                                                                                                                                                                                                                                                                                                                                                                                                                                                               |
| 19 |                           |                                     |             |                                                                     |                      |                                                                                                                                                             |                                                                                                                          |                                                                                                                                                                                 |                                                                                                                                  |                                                                                                                                       |                                                                                                                                                                                                                                                                                                                                                                                                                                                                                                                                                                                                                                                                                                                                                                                               |
| 20 |                           |                                     |             |                                                                     |                      |                                                                                                                                                             |                                                                                                                          |                                                                                                                                                                                 |                                                                                                                                  |                                                                                                                                       |                                                                                                                                                                                                                                                                                                                                                                                                                                                                                                                                                                                                                                                                                                                                                                                               |
| 21 |                           |                                     |             |                                                                     |                      |                                                                                                                                                             |                                                                                                                          |                                                                                                                                                                                 |                                                                                                                                  |                                                                                                                                       |                                                                                                                                                                                                                                                                                                                                                                                                                                                                                                                                                                                                                                                                                                                                                                                               |
| 22 | Madden et al. 2008 (45)   | Non-Randomized Intervention         | Single SNP  | Healthy men aged 43-84 years (n=111)                                | 12 weeks             | <i>CD36</i> , rs1527483, rs1049673, rs1761667, rs1984112                                                                                                    | <i>CD36</i> : 7q21.11                                                                                                    | Fish oil containing 1.02 g/d EPA and 0.69 g/d DHA (supplement)                                                                                                                  | For each SNP: AA vs. AG vs. GG                                                                                                   | HDL-c LDL-c HDL-c:LDL-c TG                                                                                                            | <b>TG:</b> In response to omega-3 supplementation, TG significantly reduced only in individuals with the GG genotype, for each SNP individually (i.e. for rs1527483, rs1049673, rs1761667 and rs1984112 individually)<br><b>LDL-c:</b> In response to omega-3 supplementation, LDL-c increased only in individuals with the rs1761667 AA genotype as well as for individuals with the rs1984112 AA genotype<br><b>HDL-c:</b> In response to omega-3 supplementation, HDL-c significantly increased in individuals with rs1761667 AA or AG as well as for individuals with the CC or CG genotype for either rs1984112, rs1527483 and/or rs1049673; NOTE: rs1527483 results should be interpreted with caution due to low sample sizes for AA and AG genotypes thus reducing statistical power) |
| 23 |                           |                                     |             |                                                                     |                      |                                                                                                                                                             |                                                                                                                          |                                                                                                                                                                                 |                                                                                                                                  |                                                                                                                                       |                                                                                                                                                                                                                                                                                                                                                                                                                                                                                                                                                                                                                                                                                                                                                                                               |
| 24 |                           |                                     |             |                                                                     |                      |                                                                                                                                                             |                                                                                                                          |                                                                                                                                                                                 |                                                                                                                                  |                                                                                                                                       |                                                                                                                                                                                                                                                                                                                                                                                                                                                                                                                                                                                                                                                                                                                                                                                               |
| 25 |                           |                                     |             |                                                                     |                      |                                                                                                                                                             |                                                                                                                          |                                                                                                                                                                                 |                                                                                                                                  |                                                                                                                                       |                                                                                                                                                                                                                                                                                                                                                                                                                                                                                                                                                                                                                                                                                                                                                                                               |
| 26 |                           |                                     |             |                                                                     |                      |                                                                                                                                                             |                                                                                                                          |                                                                                                                                                                                 |                                                                                                                                  |                                                                                                                                       |                                                                                                                                                                                                                                                                                                                                                                                                                                                                                                                                                                                                                                                                                                                                                                                               |
| 27 |                           |                                     |             |                                                                     |                      |                                                                                                                                                             |                                                                                                                          |                                                                                                                                                                                 |                                                                                                                                  |                                                                                                                                       |                                                                                                                                                                                                                                                                                                                                                                                                                                                                                                                                                                                                                                                                                                                                                                                               |
| 28 |                           |                                     |             |                                                                     |                      |                                                                                                                                                             |                                                                                                                          |                                                                                                                                                                                 |                                                                                                                                  |                                                                                                                                       |                                                                                                                                                                                                                                                                                                                                                                                                                                                                                                                                                                                                                                                                                                                                                                                               |
| 29 |                           |                                     |             |                                                                     |                      |                                                                                                                                                             |                                                                                                                          |                                                                                                                                                                                 |                                                                                                                                  |                                                                                                                                       |                                                                                                                                                                                                                                                                                                                                                                                                                                                                                                                                                                                                                                                                                                                                                                                               |
| 30 | Markovic et al. 2004 (46) | Single-Arm Clinical Trial           | Single SNP  | Healthy men (n=159)                                                 | 12 weeks             | <i>TNF</i> $\alpha$ , -308 (rs1800629)<br><i>LT</i> - $\alpha$ , +252 (rs909253)<br><i>IL</i> -1 $\beta$ , -511 (rs16944)<br><i>IL</i> -6, -174 (rs1800795) | <i>TNF</i> $\alpha$ : 6p21.33<br><i>LT</i> - $\alpha$ : 6p21.33<br><i>IL</i> -1 $\beta$ : 2q14.1<br><i>IL</i> -6: 7p15.3 | Fish oil containing 1.8 g/d EPA+DHA (supplement)                                                                                                                                | Major allele homozygotes vs. Minor allele carriers<br>or<br>Comparison between three genotypes (depending on allele frequencies) | TG                                                                                                                                    | <b>TG:</b> Significant negative correlation between pre-supplementation TG and change of TG during omega-3 supplementation for all genotypes of genes studied except for <i>LT</i> - $\alpha$ rs909253 GG genotype and <i>IL</i> -1 $\beta$ rs16944 TT genotype. In <i>LT</i> - $\alpha$ rs909253 AA genotype and <i>TNF</i> $\alpha$ rs1800629 AA genotype, signification association between BMI (divided in tertiles) and TG changes.                                                                                                                                                                                                                                                                                                                                                      |
| 31 |                           |                                     |             |                                                                     |                      |                                                                                                                                                             |                                                                                                                          |                                                                                                                                                                                 |                                                                                                                                  |                                                                                                                                       |                                                                                                                                                                                                                                                                                                                                                                                                                                                                                                                                                                                                                                                                                                                                                                                               |
| 32 |                           |                                     |             |                                                                     |                      |                                                                                                                                                             |                                                                                                                          |                                                                                                                                                                                 |                                                                                                                                  |                                                                                                                                       |                                                                                                                                                                                                                                                                                                                                                                                                                                                                                                                                                                                                                                                                                                                                                                                               |
| 33 |                           |                                     |             |                                                                     |                      |                                                                                                                                                             |                                                                                                                          |                                                                                                                                                                                 |                                                                                                                                  |                                                                                                                                       |                                                                                                                                                                                                                                                                                                                                                                                                                                                                                                                                                                                                                                                                                                                                                                                               |
| 34 |                           |                                     |             |                                                                     |                      |                                                                                                                                                             |                                                                                                                          |                                                                                                                                                                                 |                                                                                                                                  |                                                                                                                                       |                                                                                                                                                                                                                                                                                                                                                                                                                                                                                                                                                                                                                                                                                                                                                                                               |
| 35 |                           |                                     |             |                                                                     |                      |                                                                                                                                                             |                                                                                                                          |                                                                                                                                                                                 |                                                                                                                                  |                                                                                                                                       |                                                                                                                                                                                                                                                                                                                                                                                                                                                                                                                                                                                                                                                                                                                                                                                               |
| 36 |                           |                                     |             |                                                                     |                      |                                                                                                                                                             |                                                                                                                          |                                                                                                                                                                                 |                                                                                                                                  |                                                                                                                                       |                                                                                                                                                                                                                                                                                                                                                                                                                                                                                                                                                                                                                                                                                                                                                                                               |
| 37 | McColley et al. 2011 (47) | Crossover Intervention              | Single SNP  | Healthy post-menopausal women (n=16)                                | 8 weeks per diet     | <i>FABP</i> 2, rs1799883                                                                                                                                    | <i>FABP</i> 2: 4q26                                                                                                      | <b>High-Fat:</b> 50 %kcal from dietary fat<br><b>Low-Fat:</b> 20 %kcal from dietary fat<br><b>Low-Fat + omega-3:</b> 23% kcal from dietary fat with 3 %kcal from omega-3 (food) | Major allele homozygotes vs. Minor allele carriers                                                                               | TG                                                                                                                                    | --                                                                                                                                                                                                                                                                                                                                                                                                                                                                                                                                                                                                                                                                                                                                                                                            |
| 38 |                           |                                     |             |                                                                     |                      |                                                                                                                                                             |                                                                                                                          |                                                                                                                                                                                 |                                                                                                                                  |                                                                                                                                       |                                                                                                                                                                                                                                                                                                                                                                                                                                                                                                                                                                                                                                                                                                                                                                                               |
| 39 |                           |                                     |             |                                                                     |                      |                                                                                                                                                             |                                                                                                                          |                                                                                                                                                                                 |                                                                                                                                  |                                                                                                                                       |                                                                                                                                                                                                                                                                                                                                                                                                                                                                                                                                                                                                                                                                                                                                                                                               |
| 40 |                           |                                     |             |                                                                     |                      |                                                                                                                                                             |                                                                                                                          |                                                                                                                                                                                 |                                                                                                                                  |                                                                                                                                       |                                                                                                                                                                                                                                                                                                                                                                                                                                                                                                                                                                                                                                                                                                                                                                                               |
| 41 |                           |                                     |             |                                                                     |                      |                                                                                                                                                             |                                                                                                                          |                                                                                                                                                                                 |                                                                                                                                  |                                                                                                                                       |                                                                                                                                                                                                                                                                                                                                                                                                                                                                                                                                                                                                                                                                                                                                                                                               |

1  
2

|                                                    |                               |                                                                      |             |                                                                                  |                                              |                                                                                                            |                                                                          |                                                                                                                         |                                                                                                                            |                                                                      |                                                                                                                                                                                                                                                                                                                                                                                                                                                                                                                                                                                                                                                                                                                                                                       |
|----------------------------------------------------|-------------------------------|----------------------------------------------------------------------|-------------|----------------------------------------------------------------------------------|----------------------------------------------|------------------------------------------------------------------------------------------------------------|--------------------------------------------------------------------------|-------------------------------------------------------------------------------------------------------------------------|----------------------------------------------------------------------------------------------------------------------------|----------------------------------------------------------------------|-----------------------------------------------------------------------------------------------------------------------------------------------------------------------------------------------------------------------------------------------------------------------------------------------------------------------------------------------------------------------------------------------------------------------------------------------------------------------------------------------------------------------------------------------------------------------------------------------------------------------------------------------------------------------------------------------------------------------------------------------------------------------|
| 3<br>4<br>5<br>6<br>7                              | Minihane et al. 2000 (48)     | Double-Blind, Randomized, Placebo-Controlled, Crossover Intervention | Single SNP* | Healthy men aged 30-70 years at risk of atherogenic lipoprotein phenotype (n=50) | 6 weeks per diet and 480 minute postprandial | <i>APOE</i> , rs429358, rs7412                                                                             | <i>APOE</i> : 19q13.32                                                   | Fish oil containing 3.0 g/d EPA and DHA, Control oil: 6.0 g/d olive oil capsule (supplement)                            | <i>APOE</i> -E2/E3 vs. <i>APOE</i> -E3/E3 vs. <i>APOE</i> -E3/E4 + E4/E4                                                   | HDL-c<br>LDL-c<br>TG<br>Total-c<br>Total-c:HDL                       | <b>TG</b> : Postprandial: Significantly greater reduction in TG incremental area under postprandial TG curve in <i>APOE</i> -E2/E3 relative to other <i>APOE</i> genotype categories<br><b>Total-c</b> : 6-week: <i>APOE</i> -E3/E4 + E4/E4 genotype group exhibited significantly different changes in total-c (increase), relative to other <i>APOE</i> genotypes, whereby reductions in total-c occurred                                                                                                                                                                                                                                                                                                                                                           |
| 8<br>9<br>10<br>11<br>12<br>13                     | Olano-Martin et al. 2010 (49) | Randomized, Cross-Over Intervention                                  | Single SNP* | Healthy normolipidemic men (n=38)                                                | 4 weeks per diet                             | <i>APOE</i> , rs429358, rs7412                                                                             | <i>APOE</i> : 19q13.32                                                   | EPA-rich fish oil: 3.3 g/d EPA<br>DHA-rich fish oil: 3.7 g/d DHA<br>Control oil: 80:20 palm olein:soyabean (supplement) | <i>APOE</i> -E3/3 vs. <i>APOE</i> -E3/4 (carriers)                                                                         | apoB<br>apoE<br>HDL-c<br>LDL-c<br>LDL-c<br>TG<br>TG:HDL-c<br>Total-c | <b>apoB, LDL-c</b> : In <i>APOE</i> -E4 carriers only, DHA-rich oil treatment resulted in significant increases in apoB and LDL-c<br><b>TG</b> : Significant reduction in TG in response to both EPA and DHA in <i>APOE</i> -E3/E3 group; significant reduction in TG in <i>APOE</i> -E4 carriers with EPA only. No significant interactions.<br><b>Total-c</b> : Significant genotype x treatment interaction whereby <i>APOE</i> -E4 carriers exhibit total-c reductions in response to EPA-rich oil.                                                                                                                                                                                                                                                               |
| 14<br>15<br>16<br>17<br>18<br>19                   | Quellette et al. 2013 (50)    | Single-Arm Clinical Trial                                            | Single SNP  | Healthy men and women aged 18-50 (n=210)                                         | 6 weeks                                      | <i>GPAM</i> (3 SNPs), <i>AGPAT3</i> (13 SNPs), <i>AGPAT4</i> (35 SNPs) [outlined in Supplementary Table 5] | <i>GPAM</i> : 10q25.2<br><i>AGPAT3</i> : 21q22.3<br><i>AGPAT4</i> : 6q26 | Fish oil containing 1.9-2.2 g/d EPA + 1.1 g/d DHA (supplement)                                                          | Major allele homozygotes vs. Minor allele carriers or Comparison between three genotypes (depending on allele frequencies) | HDL-c<br>LDL-c<br>TG<br>Total-c                                      | <b>LDL-c</b> : Significant <i>GPAM</i> , rs2792751 genotype x supplementation interaction on LDL-c<br><b>TG</b> : Significant genotype x supplementation interaction on TG for <i>GPAM</i> , rs2792751 and rs17129561 as well as <i>AGPAT4</i> , rs9458172 and rs3798943                                                                                                                                                                                                                                                                                                                                                                                                                                                                                              |
| 20<br>21<br>22<br>23<br>24<br>25<br>26<br>27<br>28 | Quellette et al. 2014 (51)    | Single-Arm Clinical Trial                                            | Single SNP  | Healthy men and women 18-50 years (n=208)                                        | 6 weeks                                      | <i>MGLL</i> (18 SNPs) [outlined in Supplementary Table 5]                                                  | <i>MGLL</i> : 3q21.3                                                     | Fish oil containing 1.9-2.2 g/d EPA + 1.1 g/d DHA (supplement)                                                          | Major allele homozygotes vs. Minor allele carriers or Comparison between three genotypes (depending on allele frequencies) | apoB<br>HDL-c<br>LDL-c<br>LDL particle size<br>TG<br>Total-c         | <b>LDL-c</b> : Significant interactions for <i>MGLL</i> rs6776142, rs555183, rs782444, rs6787155 and rs1466571 whereby omega-3 supplementation modulated LDL-c levels; rs782444 and rs555183 minor allele homozygotes more likely to be negative responders to omega-3 supplementation (i.e. exhibit reduced LDL-c); rs6780384, rs782444 and rs6787155 major allele homozygotes more likely to be negative responders to omega-3 supplementation<br><b>LDL particle size</b> : Significant interactions for <i>MGLL</i> rs782440, rs13076543 and rs9877819 whereby omega-3 supplementation modulated LDL particle size; rs549662 minor allele homozygotes more likely to be positive responders to omega-3 supplementation (i.e. exhibit increased LDL particle size) |
| 29<br>30<br>31<br>32                               | Paschos et al. 2005 (52)      | Single-Arm Clinical Trial                                            | Single SNP* | Men with dyslipidemia, aged 35 to 67 years (n=50)                                | 12 weeks                                     | <i>APOE</i> , rs429358, rs7412                                                                             | <i>APOE</i> : 19q13.32                                                   | 8.1 g/day ALA (via 15 ml of Flaxseed oil supplementation)                                                               | <i>APOE</i> -E2/E3 vs. <i>APOE</i> -E3/E3 vs. <i>APOE</i> -E3/E4                                                           | ApoA-I<br>ApoB<br>HDL-c<br>LDL-c<br>TG<br>Total-c                    | <b>ApoA-I</b> : Significant decrease in E3/E3<br><b>HDL-c</b> : Significant decrease in E3/E3                                                                                                                                                                                                                                                                                                                                                                                                                                                                                                                                                                                                                                                                         |
| 33<br>34<br>35<br>36<br>37<br>38<br>39<br>40       | Pishva et al. 2010 (53)       | Single-Arm Clinical Trial                                            | Single SNP  | Adults with hypertriglyceridemia (n=46)                                          | 8 weeks                                      | <i>FABP2</i> , Ala54Thr (rs1799883)                                                                        | <i>FABP2</i> : 4q26                                                      | 2.0 g/day pure EPA (supplement)                                                                                         | Ala54Ala (GG) vs. Thr54 carriers (GT+TT)                                                                                   | ApoB<br>ApoC-III<br>HDL-c<br>LDL-c<br>TG<br>Total-c                  | <b>ApoC-III</b> : In response to EPA supplementation, significantly greater reductions in ApoC-III in GT+TT genotypes of rs1799883 compared to GG genotype.<br><b>HDL-c</b> : In response to EPA supplementation, significantly greater increases in HDL-c in GT+TT genotypes of rs1799883 compared to GG genotype.<br><b>LDL-c</b> : In response to EPA supplementation, LDL-c significantly decreased in GG genotypes of rs1799883 but not GT+TT genotypes.<br><b>TG</b> : In response to EPA supplementation, significantly greater reductions in TG in GT+TT genotypes of rs1799883 compared to GG genotype.                                                                                                                                                      |
| 41<br>42                                           | Pishva et al.                 | Single-Arm                                                           | Single SNP  | Adults with                                                                      | 8 weeks                                      | <i>PPARα</i> ,                                                                                             | <i>PPARα</i> : 22q13.31                                                  | 2.0 g/day pure                                                                                                          | Leu162                                                                                                                     | ApoB                                                                 | --                                                                                                                                                                                                                                                                                                                                                                                                                                                                                                                                                                                                                                                                                                                                                                    |

42  
43  
44  
45  
46  
47



|                            |                                                           |                   |                                                                                       |                            |                                                                                                                                                                                                                                 |                                                                                                                                                          |                                                                  |                                                                                                        |                                                  |                                                                                                                                                                                                                                                                                                                                                                                                                                         |
|----------------------------|-----------------------------------------------------------|-------------------|---------------------------------------------------------------------------------------|----------------------------|---------------------------------------------------------------------------------------------------------------------------------------------------------------------------------------------------------------------------------|----------------------------------------------------------------------------------------------------------------------------------------------------------|------------------------------------------------------------------|--------------------------------------------------------------------------------------------------------|--------------------------------------------------|-----------------------------------------------------------------------------------------------------------------------------------------------------------------------------------------------------------------------------------------------------------------------------------------------------------------------------------------------------------------------------------------------------------------------------------------|
| 2014 (54)                  | Clinical Trial                                            |                   | hypertriglyceridemia (n=46)                                                           |                            | Leu162Val (rs1800206)<br><i>PPARα</i> ,<br>Intron 7 SNP                                                                                                                                                                         |                                                                                                                                                          | EPA (supplement)                                                 | vs. Val162 carriers<br><br><i>and</i><br><br>Intron 7 GG vs Intron 7 GC                                | ApoCIII<br>HDL-c<br>LDL-c<br>TG<br>Total-c       |                                                                                                                                                                                                                                                                                                                                                                                                                                         |
| Roke and Mutch, 2014 (55)  | Single-Arm Clinical Trial                                 | Single SNP        | Men aged 18-25 years (n=12)                                                           | 12 weeks (+8 week washout) | <i>FADS1</i> , rs174537<br><i>FADS2</i> , rs174576 (LD=1.0 therefore presented results for rs174537)                                                                                                                            | <i>FADS1/2</i> : 11q12.2                                                                                                                                 | Fish oil containing 1.8 g/d EPA+DHA (supplement)                 | Major allele homozygotes vs. Minor allele carriers                                                     | HDL-c<br>LDL-c<br>TG<br>Total-c<br>Total-c:HDL-c | --                                                                                                                                                                                                                                                                                                                                                                                                                                      |
| Rudkowska et al. 2014 (56) | Single-Arm Clinical Trial                                 | Single SNP        | Healthy men and women aged 18-50 (n=210)                                              | 6 weeks                    | <i>SCD1</i> , rs1502593, rs522951, rs11190480, rs3071, rs3829160, rs2234970, rs10883463, rs508384                                                                                                                               | <i>SCD1</i> : 10q24.31                                                                                                                                   | Fish oil containing 1.9-2.2 g/d EPA + 1.1 g/d DHA (supplement)   | Comparison between three genotypes                                                                     | HDL-c<br>LDL-c<br>TG<br>Total-c<br>Total-c:HDL-c | <b>TG:</b> For <i>SCD1</i> rs508384, AA genotype was associated with lower TG than CA and CC genotypes both pre- and post-supplementation.                                                                                                                                                                                                                                                                                              |
| Rudkowska et al. 2014 (57) | Single-Arm Clinical Trial                                 | Nutrigenomic GWAS | Healthy men and women aged 18-50 (n=141) + Replication of GRS in FINGEN study (n=310) | 6 weeks                    | Genetic Risk Score including:<br><i>IQCJ-SCHIP1</i> (4 SNPs),<br><i>SLIT2</i> (3 SNPs),<br><i>PHF17</i> (3 SNPs),<br><i>MYB</i> (1 SNP),<br><i>NXP1</i> (1 SNP),<br><i>NELL1</i> (1 SNP)<br>[outlined in Supplementary Table 5] | <i>IQCJ-SCHIP1</i> : 3q25.32<br><i>SLIT2</i> : 4p15.31<br><i>PHF17</i> : 4q28.2<br><i>MYB</i> : 6q23.3<br><i>NXP1</i> : 7p21.3<br><i>NELL1</i> : 11p15.1 | Fish oil containing 1.9-2.2 g/d EPA + 1.1 g/d DHA (supplement)   | Responders versus non-responders (i.e. TG response) to supplementation                                 | TG                                               | Thirteen SNPs were associated with TG response to omega-3 supplementation and 10 were used in the GRS calculation. The GRS was significantly associated with TG response.<br><br><b>TG:</b> The GRS explained 21.5% of the variation in TG response when adjusted for age, sex and BMI. Replication of this GRS in the FINGEN study: the GRS explained 2.0% of the TG change but the association as NS (adjusted for age, sex and BMI). |
| Scorletti et al. 2015 (58) | Randomized, Placebo-Controlled, Double-Blind Intervention | Single SNP        | Men and women with non-alcoholic fatty liver disease (n=95)                           | 15-18 months               | <i>PNPLA3</i> , 1148M (rs738409)<br><i>TM6SF2</i> , E167K (rs58542926)                                                                                                                                                          | <i>PNPLA3</i> : 22q13.31<br><i>TM6SF2</i> : 19p13.11                                                                                                     | 1.8 g/day EPA+ 1.5 g/day DHA (supplement)                        | Comparison between three genotypes<br><i>and</i><br>Major allele homozygotes vs. Minor allele carriers | TG                                               | --                                                                                                                                                                                                                                                                                                                                                                                                                                      |
| Thifault et al. 2013 (59)  | Single-Arm Clinical Trial                                 | Single SNP*       | Healthy men and women with overweight or obesity aged 18-50 (n=210)                   | 6 weeks                    | <i>APOE</i> , rs429358, rs7412                                                                                                                                                                                                  | <i>APOE</i> : 19q13.32                                                                                                                                   | Fish oil containing 1.9-2.2 g/d EPA and 1.1 g/d DHA (supplement) | <i>APOE</i> -E2 vs. <i>APOE</i> -E3 vs. <i>APOE</i> -E4                                                | apoB<br>HDL-c<br>LDL-c<br>TG<br>Total-c          | --                                                                                                                                                                                                                                                                                                                                                                                                                                      |
| Tremblay et                | Single-Arm                                                | Single SNP        | Healthy men                                                                           | 6 weeks                    | <i>PLA2G2A</i> (5)                                                                                                                                                                                                              | <i>PLA2G2A</i> :                                                                                                                                         | Fish oil containing                                              | Major allele                                                                                           | apoB-100                                         | <b>TG:</b> omega-3 supplementation significantly reduced TG in                                                                                                                                                                                                                                                                                                                                                                          |

1  
2

|                                                                      |                                  |                                                                  |                                |                                                                   |                   |                                                                                                                                                                                                                  |                                                                                                                                                                             |                                                                                    |                                                                                                               |                                 |                                                                                                                                                                                                                                                                                                                                                                                                                                                                                                                                                                                                                                                                                                                                                                                                                                                                                                                                                                                                                                                                       |
|----------------------------------------------------------------------|----------------------------------|------------------------------------------------------------------|--------------------------------|-------------------------------------------------------------------|-------------------|------------------------------------------------------------------------------------------------------------------------------------------------------------------------------------------------------------------|-----------------------------------------------------------------------------------------------------------------------------------------------------------------------------|------------------------------------------------------------------------------------|---------------------------------------------------------------------------------------------------------------|---------------------------------|-----------------------------------------------------------------------------------------------------------------------------------------------------------------------------------------------------------------------------------------------------------------------------------------------------------------------------------------------------------------------------------------------------------------------------------------------------------------------------------------------------------------------------------------------------------------------------------------------------------------------------------------------------------------------------------------------------------------------------------------------------------------------------------------------------------------------------------------------------------------------------------------------------------------------------------------------------------------------------------------------------------------------------------------------------------------------|
| 3<br>4<br>5<br>6<br>7<br>8<br>9<br>10<br>11<br>12<br>13              | al. 2015 (60)                    | Clinical Trial                                                   |                                | and women aged 18-50 years (n=208)                                |                   | SNPs),<br><i>PLA2G2C</i> (6 SNPs),<br><i>PLA2G2D</i> (8 SNPs),<br><i>PLA2G2F</i> (6 SNPs),<br><i>PLA2G4A</i> (22 SNPs),<br><i>PLA2G6</i> (5 SNPs),<br><i>PLA2G7</i> (9 SNPs) [outlined in Supplementary Table 5] | 1p36.13<br><i>PLA2G2C</i> : 1p36.13<br><i>PLA2G2D</i> : 1p36.12<br><i>PLA2G2F</i> : 1p36.12<br><i>PLA2G4A</i> : 1q31.1<br><i>PLA2G6</i> : 22q13.1<br><i>PLA2G7</i> : 6p12.3 | 1.9 g/d EPA + 1.1 g/d DHA (supplement)                                             | homozygotes vs. Minor allele carriers or Comparison between three genotypes (depending on allele frequencies) | HDL-c<br>LDL-c<br>TG<br>Total-c | <i>PLA2G7</i> rs1805018 as well as <i>PLA2G4A</i> rs10752979, rs10737277, rs7540602 and rs3820185; in the linear regression model, <i>PLA2G6</i> rs132989, <i>PLA2G7</i> rs679667, <i>PLA2G2D</i> rs12045689, <i>PLA2G4A</i> rs 10752979 and rs1160719 together explained 5.9% of post-supplementation TG levels                                                                                                                                                                                                                                                                                                                                                                                                                                                                                                                                                                                                                                                                                                                                                      |
| 14<br>15<br>16<br>17<br>18<br>19<br>20<br>21<br>22<br>23<br>24<br>25 | Vallée Marcotte et al. 2016 (61) | Single-Arm Clinical Trial                                        | Nutrigenomic GWAS              | Men and woman aged 18-50 years (n=208)                            | 6 weeks           | <i>IQCJ</i> (16 SNPs),<br><i>NXPPI</i> (34 SNPs),<br><i>PHF17</i> (8 SNPs),<br><i>MYB</i> (9 SNPs) [outlined in Supplementary Table 5]                                                                           | <i>IQCJ</i> : 3q25.32<br><i>NXPPI</i> : 7p21.3<br><i>PHF17</i> : 4q28.2<br><i>MYB</i> : 6q23.3                                                                              | Fish oil containing 1.9-2.2 g/d EPA + 1.1 g/d DHA (supplement)                     | Comparison between three genotypes                                                                            | TG                              | <b>TG:</b> Significant gene-diet interaction on TG levels pre- vs. post-supplementation for the following SNPs: <i>IQCJ</i> (10 SNPs: rs2044704, rs1962071, rs6800211, rs17782879, rs1868414, rs2595260, rs9827242, rs1449009, rs2621309, rs61332355), <i>NXPPI</i> (4 SNPs: rs7806226, rs7805772, rs2349780, rs6974252), <i>MYB</i> (3 SNPs: rs9321493, rs11154794, rs210962). Four SNPs were still significant after applying the false discovery rate to account for multiple testing: rs1449009, rs2621309, rs61332355 in <i>IQCJ</i> ; rs7805772 in <i>NXPPI</i> . There were four dominant SNPs driving the association with the TG response: rs61332355 and rs9827242 in <i>IQCJ</i> , rs7805772 in <i>NXPPI</i> and rs11154794 in <i>MYB</i> . Significant differences in genotype frequencies between positive and negative responders to omega-3 for TG changes for <i>IQCJ</i> rs2044704, rs1962071, rs17782879, rs1868414, rs2595260, rs9827242, rs1449009, rs2621309, rs61332355, <i>NXPPI</i> rs7806226, rs7805772, <i>MYB</i> rs11154794 and rs210936. |
| 26<br>27<br>28<br>29<br>30<br>31<br>32                               | Vallée Marcotte et al. 2019 (62) | Single-Arm Clinical Trial (replication of GRS in a novel cohort) | Nutrigenomic GWAS              | Healthy adults of Mexican descent aged 18-40 years (n=191)        | 6 weeks           | Genetic Risk Score including 103 SNPs: [outlined in Supplementary Table 5]                                                                                                                                       | NA                                                                                                                                                                          | Fish oil containing 1.9 g/day EPA + 0.8 g/day DHA (supplement)                     | Responders versus non-responders (i.e. TG response) to supplementation                                        | TG                              | <b>TG:</b> A first 7-SNP GRS [SNPs selected based on previously developed GRS (57.61)] did not explain TG variation. A second GRS calculated from 103 SNPs significantly explained 4.4% of TG variation. A third GRS including the 5 most relevant SNPs significantly explained 11.0% of TG variation ( <i>NXPPI</i> rs10265408, rs10486228, rs10486228, rs17150341, rs6974252 and <i>IQCJ-SCHIP1</i> rs2595241). When subjects with the lowest TG change were not included, this third GRS explained more TG variation. Including only the 28 responders and 28 non-responders with the greatest TG variation, this third GRS explained 29.1% of TG variation.                                                                                                                                                                                                                                                                                                                                                                                                       |
| 33<br>34<br>35<br>36<br>37                                           | Vallée Marcotte et al. 2019 (63) | Single-Arm Clinical Trial                                        | Nutrigenomics GWAS (polygenic) | Men and woman aged 18-50 years with overweight or obesity (n=208) | 6 weeks           | GWAS; GRS included 31 SNPs [outlined in Supplementary Table 5]                                                                                                                                                   | NA                                                                                                                                                                          | Fish oil containing 1.9-2.2g/d EPA + 1.1g/d DHA (supplement)                       | Responders to omega-3 supplementation for TG reduction vs. Non-Responders                                     | TG                              | <b>TG:</b> 31 SNPs associated with TG response to omega-3 supplementation and used in GRS calculation; Lower GRSs were significantly more responsive to omega-3 supplementation for TG reduction compared to higher GRS (GRS accounted for 49.7% of TG responses); These findings were replicated in the FINGEN study with 23 SNPs (GRS accounted for 3.7% of TG responses).                                                                                                                                                                                                                                                                                                                                                                                                                                                                                                                                                                                                                                                                                          |
| 38<br>39<br>40<br>41                                                 | Vallée Marcotte et al. 2020 (64) | Double-Blind, Randomized, Controlled, Crossover Intervention     | Nutrigenomics GWAS (polygenic) | Men and women with abdominal obesity and elevated CRP aged 18-70  | 10 weeks per diet | GRS included 30 SNPs [outlined in Supplementary Table 5]                                                                                                                                                         | NA                                                                                                                                                                          | Control oil: 3 g/d corn oil<br>Pure EPA: 2.7 g/d<br>Pure DHA: 2.7 g/d (supplement) | Responders to different types of omega-3 supplementation for TG reduction vs.                                 | TG                              | <b>TG:</b> The GRS was significantly associated with responsiveness to EPA for TG reduction when comparing responders vs. non-responders vs. adverse responders (trend, p=0.08, for DHA). The GRS was significantly associated with responsiveness to both EPA and DHA for TG reduction when comparing responders vs. adverse responders.                                                                                                                                                                                                                                                                                                                                                                                                                                                                                                                                                                                                                                                                                                                             |

42  
43  
44  
45  
46  
47

1  
2

|                                              |                        |                                                                      |                          |                                                                                                              |          |                                                                                 |                                                                         |                                                                                                  |                                                                                                                  |                                                  |                                                                                                                                                                                                                                                                                                                                                                                                                                                                                                                                                                                                                                                                       |
|----------------------------------------------|------------------------|----------------------------------------------------------------------|--------------------------|--------------------------------------------------------------------------------------------------------------|----------|---------------------------------------------------------------------------------|-------------------------------------------------------------------------|--------------------------------------------------------------------------------------------------|------------------------------------------------------------------------------------------------------------------|--------------------------------------------------|-----------------------------------------------------------------------------------------------------------------------------------------------------------------------------------------------------------------------------------------------------------------------------------------------------------------------------------------------------------------------------------------------------------------------------------------------------------------------------------------------------------------------------------------------------------------------------------------------------------------------------------------------------------------------|
|                                              |                        |                                                                      | years (n=122)            |                                                                                                              |          |                                                                                 |                                                                         | Non-Responders vs. Adverse Responders and Responders vs. Adverse Responders                      |                                                                                                                  |                                                  |                                                                                                                                                                                                                                                                                                                                                                                                                                                                                                                                                                                                                                                                       |
| 3<br>4<br>5<br>6<br>7<br>8<br>9<br>10<br>11  | Wu et al. 2014 (65)    | Double-Blind, Randomized, Placebo-Controlled, Crossover Intervention | Single SNP               | Men and women with moderate risk of CVD (n=84)                                                               | 8 weeks  | <i>eNOS</i> Glu298Asp (rs1799983)                                               | <i>NOS3</i> : 7q36.1                                                    | Fish oil containing 0.9 g/day EPA + 0.6 g/day DHA (supplement)                                   | Major allele homozygotes (GG) vs. Minor allele carriers (GT+TT)                                                  | LDL-c<br>HDL-c<br>TG<br>Total-c                  | --                                                                                                                                                                                                                                                                                                                                                                                                                                                                                                                                                                                                                                                                    |
| 12<br>13<br>14<br>15<br>16<br>17<br>18<br>19 | Zheng et al. 2018 (66) | Double-Blind, Randomized, Controlled Intervention                    | Single SNP and Polygenic | Men and women with type 2 diabetes aged 35-80 years for men or postmenopausal and 80 years for women (n=139) | 25 weeks | <i>CD36</i> , rs1527483<br><i>NOS3</i> , rs1799983<br><i>PPARγ2</i> , rs1801282 | <i>CD36</i> : 7q21.11<br><i>NOS3</i> : 7q36.1<br><i>PPARγ2</i> : 3p25.2 | Fish oil: 2.0 g/d EPA and DHA<br>Flaxseed oil: 2.5 g/d ALA<br>Control oil: corn oil (supplement) | Major allele homozygotes vs. Minor allele carriers and High vs. low genetic score calculated based on three SNPs | HDL-c<br>LDL-c<br>TG<br>Total-c:HDL-c<br>Total-c | <b>LDL-c</b> : significant interaction for <i>PPARγ2</i> rs1801282 genotype, intervention group and LDL-c change; but increased LDL-c in G allele carriers of <i>PPARγ2</i> rs1801282 compared to CC genotype <i>only in the control</i> (corn oil) group<br><b>TG</b> : omega-3 fish oil (but not flaxseed oil) supplementation reduced TG for individuals with the <i>CD36</i> rs1527483 GG genotype (significant interaction); significant interaction between genetic score and omega-3 on TG levels whereby omega-3 (fish oil and flaxseed oil) supplementation significantly reduced TG levels compared to control only in individuals with high genetic scores |

20

21

22

23

24

25

26

27

28

29

30

31

32

33

34

35

36

37

38

39

40

41

42

43

44

45

46

47

ALA: alpha-linolenic acid, Apo: apolipoprotein, DHA: docosahexaenoic acid, EPA: eicosapentaenoic acid, HDL: high-density lipoprotein cholesterol, LDL: low-density lipoprotein cholesterol, omega-3: omega-3, N/A: not applicable, NS: Non-significant, sdLDL-c: small, dense, low-density lipoprotein cholesterol, SNP: single nucleotide polymorphism, TG: triglycerides

1. All other (not listed) gene/omega-3/lipid/lipoprotein results of interest to the present review were NS

Participants are described as “healthy” for studies that incorporated exclusion criteria for certain conditions, blood lipid levels, etc. and when studies described the population as “healthy.”

--' indicates that all the completed gene/omega-3/lipid/lipoprotein analyses were NS

\*Human *APOE* is polymorphic at two single nucleotides (rs429358 and rs7412) resulting in three different alleles ( $\epsilon$  2,  $\epsilon$  3 and  $\epsilon$  4)

**Supplementary Table 4: Genes, SNPs, lipid/lipoprotein outcomes and studies included in evidence grading process and guideline development**

| Gene, SNP(s)                              | Outcome | Studies                                                                                                                                                                                                                                                              |
|-------------------------------------------|---------|----------------------------------------------------------------------------------------------------------------------------------------------------------------------------------------------------------------------------------------------------------------------|
| <i>APOE</i> : rs429358, rs7412 (Genotype) | TG      | AbuMweis et al. 2018 (24)<br>Carvalho-Wells et al. 2012 (32)<br>Caslake et al. 2008 (34)<br>Dang et al. 2015 (36)<br>Jackson et al. 2012 (41)<br>Olano-Martin et al. 2010 (49)<br>Minihane et al. 2000 (48)<br>Paschos et al. 2005 (52)<br>Thifault et al. 2013 (59) |
| <i>APOE</i> : rs429358, rs7412            | Total-c | Fallaize et al. 2016 (7)<br>AbuMweis et al. 2018 (24)<br>Carvalho-Wells et al. 2012 (32)<br>Caslake et al. 2008 (34)<br>Dang et al. 2015 (36)<br>Jackson et al. 2012 (41)<br>Olano-Martin et al. 2010 (49)<br>Paschos et al. 2005 (52)<br>Thifault et al. 2013 (59)  |
| <i>PPAR</i> $\gamma$ 2: rs1801282         | LDL-c   | Binia et al. 2017 (27)<br>Harsløf et al. 2014 (39)<br>Itariu et al. 2012 (40)<br>Lindi et al. 2003 (43)<br>Zheng et al. 2018 (66)                                                                                                                                    |
| <i>PPAR</i> $\gamma$ 2: rs1801282         | Total-c | Binia et al. 2017 (27)<br>Harsløf et al. 2014 (39)<br>Itariu et al. 2012 (40)<br>Lindi et al. 2003 (43)<br>Zheng et al. 2018 (66)                                                                                                                                    |
| <i>PPAR</i> $\gamma$ 2: rs1801282         | TG      | Binia et al. 2017 (27)<br>Harsløf et al. 2014 (39)<br>Itariu et al. 2012 (40)<br>Lindi et al. 2003 (43)<br>Zheng et al. 2018 (66)                                                                                                                                    |
| <i>CD36</i> : rs1761667                   | HDL-c   | Dawczynski et al. 2013 (37)<br>Madden et al. 2008 (45)                                                                                                                                                                                                               |
| <i>CD36</i> : rs1761667                   | TG      | Dawczynski et al. 2013 (37)<br>Madden et al. 2008 (45)                                                                                                                                                                                                               |
| <i>CD36</i> : rs1049673                   | HDL-c   | Dawczynski et al. 2013 (37)<br>Madden et al. 2008 (45)                                                                                                                                                                                                               |
| <i>CD36</i> : rs1527483                   | TG      | Madden et al. 2008 (45)<br>Zheng et al. 2018 (66)                                                                                                                                                                                                                    |
| <i>FADS</i> : rs174547*                   | Total-c | Dumont et al. 2011 (5)<br>Dumont et al. 2018 (6)<br>Lu et al. 2010 (17)<br>Standl et al. 2012 (20)<br>Alsaleh et al. 2014 (25)<br>AbuMweis et al. 2018 (24)<br>Roke et al. 2014 (55)                                                                                 |
| 31-SNP Genetic Risk Score                 | TG      | Vallée Marcotte et al. 2019 (67)<br>Vallée Marcotte et al. 2020 (64)                                                                                                                                                                                                 |

**Supplementary Table 5: Additional list of gene(s) and SNP(s) tested in studies**

| Study                                                            | Gene(s), SNP(s)                                                                                                                                                                                                                                                                                                                                                                                                                                                                                                                                                              |
|------------------------------------------------------------------|------------------------------------------------------------------------------------------------------------------------------------------------------------------------------------------------------------------------------------------------------------------------------------------------------------------------------------------------------------------------------------------------------------------------------------------------------------------------------------------------------------------------------------------------------------------------------|
| Chen et al. <i>Int J Obes</i> ;43:808-820 (2019)                 | <p><i>FADS2</i>, rs174599, rs174601, rs556656, rs11501631, rs74771917, rs3168072, rs182008711, rs73487492, rs174602, rs12577276</p> <p><i>FADS3</i>, rs191972868, rs115905177, rs174635, rs174634, rs174454, rs12292968, rs174570, rs7930349, rs116672159, rs116139751, rs7942717, rs7115739, rs174450, rs74626285</p> <p><i>RAB31L1</i>, rs741887, rs2521561, rs2727258, rs2524288, rs117518711, rs74957100, rs77071864, rs78243280, rs741888, rs2524287, rs12420625, rs77229376, rs187943834, rs78156005, rs190738753, rs11230827, rs76133863, rs116985542, rs73491252</p> |
| Cormier et al. 2012                                              | <p><i>FADS</i> gene cluster rs174456, rs174627, rs482548, rs2072114, rs12807005, rs174448, rs2845573, rs7394871, rs7942717, rs74823126, rs174602, rs498793, rs7935946, rs174546, rs174570, rs174579, rs174611, rs174616, rs968567</p>                                                                                                                                                                                                                                                                                                                                        |
| Vallée Marcotte et al. <i>Am J Clin Nutr</i> ;109:176–185 (2019) | <p><i>IQCJ-SCHIP1</i>, rs7639707, rs62270407</p> <p><i>NXPH1</i>, rs61569932, rs1990554, rs6463808, rs6966968, rs28473103, rs28673635, rs12702829, rs78943417, rs293180, rs1837523</p> <p><i>PHF17</i>, rs1216346, rs114348423, rs75007521</p> <p><i>MYB</i>, rs72560788, rs72974149, rs210962, rs6933462</p> <p><i>NELL1</i>, rs79624996, rs1850875, rs78786240, rs117114492</p> <p><i>SLIT2</i>, rs184945470, rs143662727, rs10009109, rs10009535, rs61790364, rs73241936, rs16869663, rs76015249</p>                                                                      |
| Tremblay et al. <i>Lipids in Health and Disease</i> (2015) 14:12 | <p><i>PLA2G2A</i>, rs876018, rs955587, rs3753827, rs11573156, rs11573142</p> <p><i>PLA2G2C</i>, rs6426616, rs12139100, rs10916716, rs2301475, rs10916712, rs10916718</p> <p><i>PLA2G2D</i>, rs578459, rs16823482, rs3736979, rs584367, rs12045689, rs679667, rs17354769, rs1091671</p> <p><i>PLA2G2F</i>, rs12065685, rs6657574, rs11582551, rs818571, rs631134, rs11583904</p>                                                                                                                                                                                              |

|                                                                     |                                                                                                                                                                                                                                                                                                                                                                                                                                                                                                                                                                                                                                                        |
|---------------------------------------------------------------------|--------------------------------------------------------------------------------------------------------------------------------------------------------------------------------------------------------------------------------------------------------------------------------------------------------------------------------------------------------------------------------------------------------------------------------------------------------------------------------------------------------------------------------------------------------------------------------------------------------------------------------------------------------|
|                                                                     | <p><i>PLA2G4A</i>, rs979924, rs2076075, rs3736741, rs10911949, rs10752979, rs1160719, rs10737277, rs12720702, rs7522213, rs7540602, rs10157410, rs12720497, rs4651331, rs1569480, rs10911935, rs12353944, rs11576330, rs10489410, rs10911946, rs3820185, rs12746200, rs11587539</p> <p><i>PLA2G6</i>, rs5750546, rs132989, rs133016, rs2235346, rs2284060</p> <p><i>PLA2G7</i>, rs12195701, rs12528807, rs1421368, rs1421378, rs17288905, rs1805017, rs1805018, rs6929105, rs7756935</p>                                                                                                                                                               |
| <p>Ouellette et al. J Nutrigenet Nutrigenomics;6:268–280 (2013)</p> | <p><i>GPAM</i>, rs17129561, rs10787428, rs2792751</p> <p><i>AGPAT3</i>, rs999519, rs2838440, rs2838445, rs2838458, rs4818873, rs9978441, rs9982600, rs11700575, rs17004619, rs2838452, rs2838456, rs3788086, rs2838429</p> <p><i>AGPAT4</i>, rs746731, rs747866, rs1125640, rs2277092, rs2293286, rs3757025, rs3798225, rs3798920, rs3798924, rs3798929, rs3798943, rs3798945, rs3822853, rs3823058, rs4709501, rs6906489, rs6923835, rs7750302, rs7769321, rs9458172, rs10945713, rs10945719, rs11965825, rs12202278, rs17627837, rs12524665, rs1001422, rs6455711, rs9456642, rs2064721, rs3778227, rs3798922, rs11967514, rs7768457, rs12662114</p> |
| <p>Ouellette et al. Lipids in Health and Disease, 13:86 (2014)</p>  | <p><i>MGLL</i>, rs782440, rs16826716, rs6776142, rs9877819, rs555183, rs6780384, rs13076593, rs605188, rs6765071, rs782444, rs549662, rs3773155, rs541855, rs6439081, rs6439082, rs6787155, rs1466571, rs893294</p>                                                                                                                                                                                                                                                                                                                                                                                                                                    |
| <p>Bouchard-Mercier et al. Genes Nutr 9:395 (2014)</p>              | <p><i>GCK</i>, rs2268573, rs2908297, rs2971676, rs758989, rs12673242, rs2908290, rs2284777, rs2300584, rs1990458, rs741038, rs1799884, rs2908277, rs3757838</p>                                                                                                                                                                                                                                                                                                                                                                                                                                                                                        |
| <p>Bouchard-Mercier et al. Nutrients, 6, 1145-1163 (2014)</p>       | <p><i>RXRA</i>, rs10881576, rs7871655, rs12339187, rs11185660, rs11103473, rs10776909, rs12004589, rs3132301, rs1805352, rs3132294, rs1805343, rs1045570</p> <p><i>CPT1A</i>, rs3019598, rs897048, rs7942147, rs4930248, rs11228364, rs11228368, rs10896371, rs1017640, rs613084</p> <p><i>ACADVL</i>, rs2017365</p> <p><i>ACAA2</i>, rs529556, rs10502901, rs631536, rs1942421, rs2276168, rs7237253</p> <p><i>ABCD2</i>, rs4072006, rs10877201, rs12582802, rs4294600, rs11172696, rs10877173, rs7133376, rs7968837</p> <p><i>ACOX1</i>, rs10852766, rs3744033, rs12430, rs8065144,</p>                                                              |

|                                                                  |                                                                                                                                                                                                                                                                                                                                                                                                                                                                                                                                                                               |
|------------------------------------------------------------------|-------------------------------------------------------------------------------------------------------------------------------------------------------------------------------------------------------------------------------------------------------------------------------------------------------------------------------------------------------------------------------------------------------------------------------------------------------------------------------------------------------------------------------------------------------------------------------|
|                                                                  | rs11651351, rs3643, rs7213998, rs17583163<br><i>ACAA1</i> , rs2239621, rs156265, rs5875                                                                                                                                                                                                                                                                                                                                                                                                                                                                                       |
| AlSaleh et al. Genes Nutr 9:412 (2014)                           | <i>CETP</i> , rs3764261, rs247616, rs7205804<br><i>LIPC</i> , rs1532085<br><i>APOB</i> , rs1367117<br><i>ABCG5</i> , <i>ABCG8</i> , rs4299376<br><i>TIMD4</i> , <i>HAVCR1</i> , rs6882076, rs1501908, rs1553318<br>GCKR, rs1260326, rs780094<br>TRIB1, rs2954022, rs10808546, rs2954029<br><i>ANGPTL3</i> , <i>DOCK7</i> , rs3850634, rs1167998, rs2131925<br><i>FADS1</i> , <i>FADS2</i> , <i>FADS3</i> , rs174550, rs174547, rs174546, rs174583<br><i>GALNT2</i> , rs4846914, rs1321257<br><i>ABCA1</i> , rs4149268<br><i>APOE</i> , <i>APOC1</i> , <i>APOC2</i> , rs439401 |
| Vallée Marcotte et al. Genes & Nutrition 15:10 (2020)            | <i>IQCJ-SCHIP1</i> , rs7639707, rs62270407<br>NXP1, rs61569932, rs1990554, rs6463808, rs6966968, rs28473103, rs28673635, rs12702829, rs78943417, rs293180, rs1837523<br><i>PHF17</i> , rs1216346, rs114348423, rs75007521<br><i>MYB</i> , rs72560788, rs72974149, rs210962, rs6933462<br><i>NELL1</i> , rs79624996, rs1850875, rs78786240, rs117114492<br><i>SLIT2</i> , rs184945470, rs143662727, rs10009109, rs10009535, rs61790364, rs73241936, rs16869663, rs76015249                                                                                                     |
| Rudkowska et al. Journal of Lipid Research 55 (2014)             | <i>IQCJ-SCHIP1</i> , <i>MYB</i> , <i>NELL1</i> , <i>NXP1</i> , <i>PHF17</i> , <i>SLIT2</i> , rs2621308, rs1449009, rs61332355, rs2621309, rs2952724, rs2629715, rs1216352, rs1216365, rs931681, rs6920829, rs6463808, rs752088                                                                                                                                                                                                                                                                                                                                                |
| Vallée Marcotte et al. J Nutrigenet Nutrigenomics;9 :1-11 (2016) | <i>IQCJ</i> , rs12497650, rs4501157, rs13091349, rs2044704, rs1062071, rs7634829, rs2621294, rs6800211, rs17782879, rs1868414, rs2595260, rs6763890, rs9827242, rs1449009, rs2621309, rs61332355                                                                                                                                                                                                                                                                                                                                                                              |

|                                                         |                                                                                                                                                                                                                                                                                                                                                                                                                                                                                                                                                                                                                                                                                                                                                                                                                                                                                                                                                                                                                                                                                                                                                                                            |
|---------------------------------------------------------|--------------------------------------------------------------------------------------------------------------------------------------------------------------------------------------------------------------------------------------------------------------------------------------------------------------------------------------------------------------------------------------------------------------------------------------------------------------------------------------------------------------------------------------------------------------------------------------------------------------------------------------------------------------------------------------------------------------------------------------------------------------------------------------------------------------------------------------------------------------------------------------------------------------------------------------------------------------------------------------------------------------------------------------------------------------------------------------------------------------------------------------------------------------------------------------------|
|                                                         | <p><i>NXPFI</i>, rs6956210, rs2107779, rs10273195, rs12216689, rs6963644, rs17150341, rs1013868, rs12537067, rs4318981, rs17153997, rs7801099, rs4725120, rs1859275, rs10238726, rs1012960, rs11767429, rs4333500, rs7793115, rs7799856, rs7806226, rs13221144, rs17406479, rs10486228, rs17154569, rs4141002, rs7805772, rs2349780, rs2107474, rs11769942, rs6952383, rs6974252, rs10265408, rs2189904, rs2057862</p> <p><i>PHF17</i>, rs2217023, rs4975270, rs11722830, rs12505447, rs6534704, rs13148510, rs13143771, rs13142964</p> <p><i>MYB</i>, rs9321493, rs11154794, rs210798, rs210936, rs7757388, rs210962, rs17639758, rs1013891, rs2179308</p>                                                                                                                                                                                                                                                                                                                                                                                                                                                                                                                                |
| <p>Vallée Marcotte et al. Nutrients; 11, 737 (2019)</p> | <p><i>IQCJ-SCHIP1</i>, rs12497650, rs4501157, rs13091349, rs2044704, rs1962071, rs7634829, rs2621294, rs6800211, rs17782879, rs1868414, rs2595260, rs6763890, rs1449009, rs61332355, rs12485627, rs2595242, rs7639937, rs9820807, rs1375409, rs1967363, rs9824310, rs11915303, rs9835214, rs11921343, rs13066560, rs1675497, rs9839862, rs16829875, rs17795566, rs9860588, rs16830408, rs17798579, rs2364930, rs9865997, rs2595241, rs7632574, rs2621308</p> <p><i>NXPFI</i>, rs6956210, rs2107779, rs10273195, rs12216689, rs6963644, rs17150341, rs1013868, rs4318981, rs17153997, rs7801099, rs4725120, rs10238726, rs1012960, rs11767429, rs4333500, rs7793115, rs7799856, rs7806226, rs13221144, rs17406479, rs10486228, rs17154569, rs4141002, rs7805772, rs2349780, rs2107474, rs11769942, rs6952383, rs6974252, rs10265408, rs2189904, rs2057862, rs6463808</p> <p><i>PHF17</i>, rs2217023, rs4975270, rs11722830, rs12505447, rs6534704, rs13148510, rs13143771, rs13142964, rs1216352, rs1216365</p> <p><i>MYB</i>, rs9321493, rs11154794, rs210798, rs210936, rs7757388, rs17639758, rs1013891, rs2179308, rs6920829, <i>SLIT2</i>, rs2952724</p> <p><i>NELLI</i>, rs752088</p> |



Supplementary Table 6: 31-SNP Nutri-GRS

| <b>Gene, rs Number</b>          | <b>Alleles<sup>1</sup></b> | <b>Associated Points</b> |
|---------------------------------|----------------------------|--------------------------|
| <i>IQCJ-SCHIP1</i> , rs7639707  | <u>A</u> /G                | +1                       |
| <i>IQCJ-SCHIP1</i> , rs62270407 | C/ <u>T</u>                | -1                       |
| <i>NXPH1</i> , rs61569932,      | <u>G</u> /T                | +1                       |
| <i>NXPH1</i> , rs1990554        | <u>A</u> /C                | +1                       |
| <i>NXPH1</i> , rs6463808        | <u>A</u> /G                | +1                       |
| <i>NXPH1</i> , rs6966968        | <u>A</u> /G                | +1                       |
| <i>NXPH1</i> , rs28473103       | <u>A</u> /G                | -1                       |
| <i>NXPH1</i> , rs28673635       | <u>A</u> /G                | +1                       |
| <i>NXPH1</i> , rs12702829       | <u>C</u> /T                | +1                       |
| <i>NXPH1</i> , rs78943417       | A/ <u>T</u>                | -1                       |
| <i>NXPH1</i> , rs293180         | G/ <u>T</u>                | +1                       |
| <i>NXPH1</i> , rs1837523        | <u>C</u> /T                | -1                       |
| <i>PHF17</i> , rs1216346        | <u>C</u> /T                | +1                       |
| <i>PHF17</i> , rs114348423      | <u>A</u> /G                | +1                       |
| <i>PHF17</i> , rs75007521       | <u>G</u> /T                | -1                       |
| <i>MYB</i> , rs72560788         | <u>C</u> /T                | -1                       |
| <i>MYB</i> , rs72974149         | <u>A</u> /G                | -1                       |
| <i>MYB</i> , rs210962           | <u>C</u> /T                | -1                       |
| <i>MYB</i> , rs6933462          | <u>C</u> /G                | +1                       |
| <i>NELL1</i> , rs79624996       | <u>A</u> /G                | +1                       |
| <i>NELL1</i> , rs1850875        | <u>C</u> /T                | +1                       |
| <i>NELL1</i> , rs78786240       | <u>C</u> /T                | -1                       |
| <i>NELL1</i> , rs117114492      | <u>G</u> /T                | +1                       |
| <i>SLIT2</i> , rs184945470      | <u>C</u> /T                | +1                       |
| <i>SLIT2</i> , rs143662727      | <u>A</u> /G                | -1                       |
| <i>SLIT2</i> , rs10009109       | <u>C</u> /T                | +1                       |
| <i>SLIT2</i> , rs10009535       | <u>A</u> /G                | +1                       |
| <i>SLIT2</i> , rs61790364       | <u>A</u> /G                | +1                       |
| <i>SLIT2</i> , rs73241936       | <u>C</u> /T                | +1                       |
| <i>SLIT2</i> , rs16869663       | <u>A</u> /G                | +1                       |
| <i>SLIT2</i> , rs76015249       | <u>A</u> /G                | +1                       |

1. Minor alleles are underlined

For individuals carrying one or two minor alleles, provide the associated number of points (either +1 or -1). For individuals homozygous for the major allele, provide 0 points. Count the overall number of points. Individuals with lower nutri-GRS are more likely to respond to approximately 3.0 g/day EPA+DHA for TG lowering.

## References

1. Bouchard-Mercier A, Godin G, Lamarche B, Pérusse L, Vohl M-C. Effects of Peroxisome Proliferator-Activated Receptors, Dietary Fat Intakes and Gene–Diet Interactions on Peak Particle Diameters of Low-Density Lipoproteins. *J Nutrigenet Nutrigenomics*. 2011;4(1):36–48.
2. Bodhini D, Gaal S, Shatwan I, Ramya K, Ellahi B, Surendran S, et al. Interaction between TCF7L2 polymorphism and dietary fat intake on high density lipoprotein cholesterol. Li S, editor. *PLoS ONE*. 2017 Nov 28;12(11):e0188382.
3. Chen Y, Estampador AC, Keller M, Poveda A, Dalla-Riva J, Johansson I, et al. The combined effects of FADS gene variation and dietary fats in obesity-related traits in a population from the far north of Sweden: the GLACIER Study. *International Journal of Obesity*. 2019 Apr;43(4):808–20.
4. Ching YK, Chin YS, Appukutty M, Ramanchadran V, Yu CY, Ang GY, et al. Interaction of Dietary Linoleic Acid and  $\alpha$ -Linolenic Acids with rs174547 in FADS1 Gene on Metabolic Syndrome Components among Vegetarians. *Nutrients*. 2019 Jul;11(7):1686.
5. Dumont J, Huybrechts I, Spinneker A, Gottrand F, Grammatikaki E, Bevilacqua N, et al. FADS1 genetic variability interacts with dietary  $\alpha$ -linolenic acid intake to affect serum non-HDL-cholesterol concentrations in European adolescents. *J Nutr*. 2011 Jul;141(7):1247–53.
6. Dumont J, Goumidi L, Grenier-Boley B, Cottel D, Marécaux N, Montaye M, et al. Dietary linoleic acid interacts with FADS1 genetic variability to modulate HDL-cholesterol and obesity-related traits. *Clinical Nutrition*. 2018 Oct 1;37(5):1683–9.
7. Fallaize R, Celis-Morales C, Macready AL, Marsaux CF, Forster H, O'Donovan C, et al. The effect of the apolipoprotein E genotype on response to personalized dietary advice intervention: findings from the Food4Me randomized controlled trial. *Am J Clin Nutr*. 2016 Sep;104(3):827–36.
8. Fontaine-Bisson B, El-Sohemy A. Genetic polymorphisms of tumor necrosis factor- $\alpha$  modify the association between dietary polyunsaturated fatty acids and plasma high-density lipoprotein-cholesterol concentrations in a population of young adults. *J Nutrigenet Nutrigenomics*. 2008;1(5):215–23.
9. Fontaine-Bisson B, Wolever TMS, Connelly PW, Corey PN, El-Sohemy A. NF- $\kappa$ B  $-94$ Ins/Del ATTG polymorphism modifies the association between dietary polyunsaturated fatty acids and HDL-cholesterol in two distinct populations. *Atherosclerosis*. 2009 Jun;204(2):465–70.
10. Hellstrand S, Sonestedt E, Ericson U, Gullberg B, Wirfält E, Hedblad B, et al. Intake levels of dietary long-chain PUFAs modify the association between genetic variation in FADS and LDL-C. *J Lipid Res*. 2012 Jun;53(6):1183–9.
11. Hosseini-Esfahani F, Mirmiran P, Koochakpoor G, Daneshpour MS, Guity K, Azizi F. Some dietary factors can modulate the effect of the zinc transporters 8 polymorphism on the risk of metabolic syndrome. *Sci Rep*. 2017 Dec;7(1):1649.

- 1
- 2
- 3
- 4 12. Jang HB, Hwang J-Y, Park JE, Oh JH, Ahn Y, Kang J-H, et al. Intake levels of dietary polyunsaturated
- 5 fatty acids modify the association between the genetic variation in *PCSK5* and HDL cholesterol. *J*
- 6 *Med Genet*. 2014 Dec;51(12):782–8.
- 7
- 8 13. Joffe YT, van der Merwe L, Carstens M, Collins M, Jennings C, Levitt NS, et al. Tumor Necrosis Factor-
- 9  $\alpha$  Gene -308 G/A Polymorphism Modulates the Relationship between Dietary Fat Intake, Serum
- 10 Lipids, and Obesity Risk in Black South African Women. *The Journal of Nutrition*. 2010 May
- 11 1;140(5):901–7.
- 12
- 13 14. Joffe YT, van der Merwe L, Evans J, Collins M, Lambert EV, September A, et al. The tumor necrosis
- 14 factor- $\alpha$  gene -238 G>A polymorphism, dietary fat intake, obesity risk and serum lipid
- 15 concentrations in black and white South African women. *Eur J Clin Nutr*. 2012 Dec;66(12):1295–
- 16 302.
- 17
- 18 15. Joffe YT, van der Merwe L, Evans J, Collins M, Lambert EV, September A, et al. Interleukin-6 Gene
- 19 Polymorphisms, Dietary Fat Intake, Obesity and Serum Lipid Concentrations in Black and White
- 20 South African Women. *Nutrients*. 2014 Jun 24;6(6):2436–65.
- 21
- 22
- 23 16. Lai Chao-Qiang, Corella Dolores, Demissie Serkalem, Cupples L. Adrienne, Adiconis Xian, Zhu
- 24 Yueping, et al. Dietary Intake of n-6 Fatty Acids Modulates Effect of Apolipoprotein A5 Gene on
- 25 Plasma Fasting Triglycerides, Remnant Lipoprotein Concentrations, and Lipoprotein Particle Size.
- 26 *Circulation*. 2006 May 2;113(17):2062–70.
- 27
- 28 17. Lu Y, Feskens EJ, Dollé ME, Imholz S, Verschuren WM, Müller M, et al. Dietary n–3 and n–6
- 29 polyunsaturated fatty acid intake interacts with *FADS1* genetic variation to affect total and HDL-
- 30 cholesterol concentrations in the Doetinchem Cohort Study. *The American Journal of Clinical*
- 31 *Nutrition*. 2010 Jul 1;92(1):258–65.
- 32
- 33
- 34 18. Nettleton JA, Volcik KA, Hoogeveen RC, Boerwinkle E. Carbohydrate intake modifies associations
- 35 between *ANGPTL4*[E40K] genotype and HDL-cholesterol concentrations in White men from the
- 36 Atherosclerosis Risk in Communities (ARIC) study. *Atherosclerosis*. 2009 Mar;203(1):214–20.
- 37
- 38 19. Richardson K, Louie-Gao Q, Arnett DK, Parnell LD, Lai C-Q, Davalos A, et al. The *PLIN4* Variant rs8887
- 39 Modulates Obesity Related Phenotypes in Humans through Creation of a Novel miR-522 Seed Site.
- 40 *PLOS ONE*. 2011 Apr 20;6(4):e17944.
- 41
- 42 20. Standl M, Lattka E, Stach B, Koletzko S, Bauer C-P, von Berg A, et al. *FADS1* *FADS2* Gene Cluster,
- 43 PUFA Intake and Blood Lipids in Children: Results from the GINIplus and LISAPLUS Studies. *PLoS One*
- 44 [Internet]. 2012 May 21 [cited 2020 Aug 3];7(5). Available from:
- 45 <https://www.ncbi.nlm.nih.gov/pmc/articles/PMC3357401/>
- 46
- 47
- 48 21. Tai ES, Corella D, Demissie S, Cupples LA, Coltell O, Schaefer EJ, et al. Polyunsaturated Fatty Acids
- 49 Interact with the *PPARA*-L162V Polymorphism to Affect Plasma Triglyceride and Apolipoprotein C-
- 50 III Concentrations in the Framingham Heart Study. *J Nutr*. 2005 Mar 1;135(3):397–403.
- 51
- 52 22. Volcik KA, Nettleton JA, Ballantyne CM, Boerwinkle E. Peroxisome proliferator-activated receptor
- 53  $\alpha$  genetic variation interacts with n-6 and long-chain n-3 fatty acid intake to affect total
- 54 cholesterol and LDL-cholesterol concentrations in the Atherosclerosis Risk in Communities Study.
- 55 *Am J Clin Nutr*. 2008;87:1926–31.
- 56
- 57
- 58
- 59
- 60

- 1  
2  
3 23. Warodomwichit D, Arnett DK, Kabagambe EK, Tsai MY, Hixson JE, Straka RJ, et al. Polyunsaturated  
4 Fatty Acids Modulate the Effect of TCF7L2 Gene Variants on Postprandial Lipemia. *The Journal of*  
5 *Nutrition*. 2009 Mar 1;139(3):439–46.  
6
- 7  
8 24. AbuMweis SS, Panchal SK, Jones PJH. Triacylglycerol-Lowering Effect of Docosahexaenoic Acid Is Not  
9 Influenced by Single-Nucleotide Polymorphisms Involved in Lipid Metabolism in Humans. *Lipids*.  
10 2018;53(9):897–908.  
11
- 12 25. AlSaleh A, Maniou Z, Lewis FJ, Hall WL, Sanders TAB, O'Dell SD. Genetic predisposition scores for  
13 dyslipidaemia influence plasma lipid concentrations at baseline, but not the changes after  
14 controlled intake of n-3 polyunsaturated fatty acids. *Genes Nutr*. 2014 Jul;9(4):412.  
15
- 16 26. Armstrong P, Kelley DS, Newman JW, Stagers FE, Hartiala J, Allayee H, et al. Arachidonate 5-  
17 Lipoxygenase Gene Variants Affect Response to Fish Oil Supplementation by Healthy African  
18 Americans1234. *J Nutr*. 2012 Aug;142(8):1417–28.  
19
- 20 27. Binia A, Vargas-Martínez C, Ancira-Moreno M, Gosoni LM, Montoliu I, Gámez-Valdez E, et al.  
21 Improvement of cardiometabolic markers after fish oil intervention in young Mexican adults and  
22 the role of PPAR $\alpha$  L162V and PPAR $\gamma$ 2 P12A. *The Journal of Nutritional Biochemistry*. 2017  
23 May;43:98–106.  
24
- 25 28. Bouchard-Mercier A, Rudkowska I, Lemieux S, Couture P, Vohl M-C. Polymorphisms, de novo  
26 lipogenesis, and plasma triglyceride response following fish oil supplementation. *J Lipid Res*. 2013  
27 Oct;54(10):2866–73.  
28
- 29 29. Bouchard-Mercier A, Rudkowska I, Lemieux S, Couture P, Vohl M-C. Polymorphisms in Genes  
30 Involved in Fatty Acid  $\beta$ -Oxidation Interact with Dietary Fat Intakes to Modulate the Plasma TG  
31 Response to a Fish Oil Supplementation. *Nutrients*. 2014 Mar 18;6(3):1145–63.  
32
- 33 30. Bouchard-Mercier A, Rudkowska I, Lemieux S, Couture P, Vohl M-C. An interaction effect between  
34 glucokinase gene variation and carbohydrate intakes modulates the plasma triglyceride response  
35 to a fish oil supplementation. *Genes Nutr*. 2014 May;9(3):395.  
36
- 37 31. Caron-Dorval D, Paquet P, Paradis A-M, Rudkowska I, Lemieux S, Couture P, et al. Effect of the PPAR-  
38 Alpha L162V Polymorphism on the Cardiovascular Disease Risk Factor in Response to n–3  
39 Polyunsaturated Fatty Acids. *J Nutrigenet Nutrigenomics*. 2008;1(4):205–12.  
40
- 41 32. Carvalho-Wells AL, Jackson KG, Lockyer S, Lovegrove JA, Minihane AM. APOE genotype influences  
42 triglyceride and C-reactive protein responses to altered dietary fat intake in UK adults. *The*  
43 *American Journal of Clinical Nutrition*. 2012 Dec 1;96(6):1447–53.  
44
- 45 33. Lockyer S, Tzanetou M, Carvalho-Wells AL, Jackson KG, Minihane AM, Lovegrove JA. SATgene dietary  
46 model to implement diets of differing fat composition in prospectively genotyped groups (apoE)  
47 using commercially available foods. *British Journal of Nutrition*. 2012 Nov;108(9):1705–13.  
48
- 49 34. Caslake MJ, Miles EA, Kofler BM, Lietz G, Curtis P, Armah CK, et al. Effect of sex and genotype on  
50 cardiovascular biomarker response to fish oils: the FINGEN Study. *The American Journal of Clinical*  
51 *Nutrition*. 2008 Sep 1;88(3):618–29.  
52  
53  
54  
55  
56  
57  
58  
59

- 1
- 2
- 3
- 4 35. Cormier H, Rudkowska I, Paradis A-M, Thifault E, Garneau V, Lemieux S, et al. Association between
- 5 Polymorphisms in the Fatty Acid Desaturase Gene Cluster and the Plasma Triacylglycerol Response
- 6 to an n-3 PUFA Supplementation. *Nutrients*. 2012 Aug;4(8):1026–41.
- 7
- 8 36. Dang TM, Conway V, Plourde M. Disrupted fatty acid distribution in HDL and LDL according to
- 9 apolipoprotein E allele. *Nutrition*. 2015 Jun 1;31(6):807–12.
- 10
- 11 37. Dawczynski C, Massey KA, Ness C, Kiehntopf M, Stepanow S, Platzer M, et al. Randomized placebo-
- 12 controlled intervention with n-3 LC-PUFA-supplemented yoghurt: Effects on circulating eicosanoids
- 13 and cardiovascular risk factors. *Clinical Nutrition*. 2013 Oct 1;32(5):686–96.
- 14
- 15 38. Ferguson JF, Phillips CM, McMonagle J, Pérez-Martínez P, Shaw DI, Lovegrove JA, et al. NOS3 gene
- 16 polymorphisms are associated with risk markers of cardiovascular disease, and interact with
- 17 omega-3 polyunsaturated fatty acids. *Atherosclerosis*. 2010 Aug 1;211(2):539–44.
- 18
- 19 39. Harsløf LBS, Damsgaard CT, Hellgren LI, Andersen AD, Vogel U, Lauritzen L. Effects on metabolic
- 20 markers are modified by PPARG2 and COX2 polymorphisms in infants randomized to fish oil. *Genes*
- 21 *Nutr*. 2014 May;9(3):396.
- 22
- 23
- 24 40. Itariu BK, Zeyda M, Hochbrugger EE, Neuhofer A, Prager G, Schindler K, et al. Long-chain n–3 PUFAs
- 25 reduce adipose tissue and systemic inflammation in severely obese nondiabetic patients: a
- 26 randomized controlled trial. *The American Journal of Clinical Nutrition*. 2012 Nov 1;96(5):1137–49.
- 27
- 28 41. Jackson KG, Lockyer S, Carvalho-Wells AL, Williams CM, Minihane AM, Lovegrove JA. Dietary fat
- 29 manipulation has a greater impact on postprandial lipid metabolism than the apolipoprotein E
- 30 (epsilon) genotype—insights from the SATgene study. *Molecular Nutrition & Food Research*.
- 31 2012;56(12):1761–70.
- 32
- 33
- 34 42. Jackson KG, Lockyer S, Carvalho-Wells AL, Williams CM, Minihane AM, Lovegrove JA. Apolipoprotein
- 35 E (epsilon) genotype has a greater impact on apoB-48 than apoB-100 responses to dietary fat
- 36 manipulation—insights from the SATgene study. *Molecular Nutrition & Food Research*.
- 37 2017;61(4):1600688.
- 38
- 39 43. Lindi V, Schwab U, Louheranta A, Laakso M, Vessby B, Hermansen K, et al. Impact of the Pro12Ala
- 40 polymorphism of the PPAR- $\gamma$ 2 gene on serum triacylglycerol response to n–3 fatty acid
- 41 supplementation. *Molecular Genetics and Metabolism*. 2003 May;79(1):52–60.
- 42
- 43 44. Lindman AS, Pedersen JI, Hjerkin EM, Arnesen H, Veierød MB, Ellingsen I, et al. The effects of long-
- 44 term diet and omega-3 fatty acid supplementation on coagulation factor VII and serum
- 45 phospholipids with special emphasis on the R353Q polymorphism of the FVII gene. *Thromb*
- 46 *Haemost*. 2004 Jun;91(6):1097–104.
- 47
- 48
- 49 45. Madden J, Carrero J, Brunner A, Dastur N, Shearman C, Calder P, et al. Polymorphisms in the CD36
- 50 gene modulate the ability of fish oil supplements to lower fasting plasma triacyl glycerol and raise
- 51 HDL cholesterol concentrations in healthy middle-aged men. *Prostaglandins, Leukotrienes and*
- 52 *Essential Fatty Acids*. 2008;78:327–35.
- 53
- 54 46. Markovic O, O'Reilly G, Fussell HelenM, Turner SJ, Calder PC, Howell WM, et al. Role of single
- 55 nucleotide polymorphisms of pro-inflammatory cytokine genes in the relationship between serum
- 56
- 57
- 58
- 59
- 60

- lipids and inflammatory parameters, and the lipid-lowering effect of fish oil in healthy males. *Clinical Nutrition*. 2004 Oct 1;23(5):1084–95.
47. McColley SP, Georgopoulos A, Young LR, Kurzer MS, Redmon JB, Raatz SK. A high-fat diet and the threonine-encoding allele (Thr54) polymorphism of fatty acid-binding protein 2 reduce plasma triglyceride-rich lipoproteins. *Nutrition Research*. 2011 Jul 1;31(7):503–8.
48. Minihane Anne M., Khan Syrah, Leigh-Firbank Elizabeth C., Talmud Philippa, Wright John W., Murphy Margaret C., et al. ApoE Polymorphism and Fish Oil Supplementation in Subjects With an Atherogenic Lipoprotein Phenotype. *Arteriosclerosis, Thrombosis, and Vascular Biology*. 2000 Aug 1;20(8):1990–7.
49. Olano-Martin E, Anil E, Caslake MJ, Packard CJ, Bedford D, Stewart G, et al. Contribution of apolipoprotein E genotype and docosahexaenoic acid to the LDL-cholesterol response to fish oil. *Atherosclerosis*. 2010 Mar;209(1):104–10.
50. Ouellette C, Cormier H, Rudkowska I, Guénard F, Lemieux S, Couture P, et al. Polymorphisms in Genes Involved in the Triglyceride Synthesis Pathway and Marine Omega-3 Polyunsaturated Fatty Acid Supplementation Modulate Plasma Triglyceride Levels. *LFG*. 2013;6(4–5):268–80.
51. Ouellette C, Rudkowska I, Lemieux S, Lamarche B, Couture P, Vohl M-C. Gene-diet interactions with polymorphisms of the MGLL gene on plasma low-density lipoprotein cholesterol and size following an omega-3 polyunsaturated fatty acid supplementation: a clinical trial. *Lipids Health Dis*. 2014 May 24;13:86.
52. Paschos GK, Yiannakouris N, Rallidis LS, Davies I, Griffin BA, Panagiotakos DB, et al. Apolipoprotein E Genotype in Dyslipidemic Patients and Response of Blood Lipids and Inflammatory Markers to Alpha-Linolenic Acid. *Angiology*. 2005 Jan 1;56(1):49–60.
53. Pishva H, Mahboob S-A, Mehdipour P, Eshraghian MR, Mohammadi-Asl J, Hosseini S, et al. Fatty acid-binding protein-2 genotype influences lipid and lipoprotein response to eicosapentaenoic acid supplementation in hypertriglyceridemic subjects. *Nutrition*. 2010 Nov 1;26(11):1117–21.
54. Pishva H, Mehdipour P, Eshraghian MR, Mahboob S-A. Effects of Eicosapentaenoic Acid Supplementation on Lipid and Lipoprotein Profile in Hypertriglyceridemic Subjects with Different Proliferator-activated Receptor Alpha Genotypes. *Int J Prev Med*. 2014 Mar;5(3):333–40.
55. Roke K, Mutch DM. The Role of FADS1/2 Polymorphisms on Cardiometabolic Markers and Fatty Acid Profiles in Young Adults Consuming Fish Oil Supplements. *Nutrients*. 2014 Jun 16;6(6):2290–304.
56. Rudkowska I, Julien P, Couture P, Lemieux S, Tchernof A, Barbier O, et al. Cardiometabolic risk factors are influenced by Stearoyl-CoA Desaturase (SCD) –1 gene polymorphisms and n-3 polyunsaturated fatty acid supplementation. *Molecular Nutrition & Food Research*. 2014;58(5):1079–86.
57. Rudkowska I, Guénard F, Julien P, Couture P, Lemieux S, Barbier O, et al. Genome-wide association study of the plasma triglyceride response to an n-3 polyunsaturated fatty acid supplementation. *J Lipid Res*. 2014 Jul;55(7):1245–53.

- 1  
2  
3  
4  
5  
6  
7  
8  
9  
10  
11  
12  
13  
14  
15  
16  
17  
18  
19  
20  
21  
22  
23  
24  
25  
26  
27  
28  
29  
30  
31  
32  
33  
34  
35  
36  
37  
38  
39  
40  
41  
42  
43  
44  
45  
46  
47  
48  
49  
50  
51  
52  
53  
54  
55  
56  
57  
58  
59  
60
58. Scorletti E, West AL, Bhatia L, Hoile SP, McCormick KG, Burdge GC, et al. Treating liver fat and serum triglyceride levels in NAFLD, effects of PNPLA3 and TM6SF2 genotypes: Results from the WELCOME trial. *Journal of Hepatology*. 2015 Dec 1;63(6):1476–83.
  59. Thifault E, Cormier H, Bouchard-Mercier A, Rudkowska I, Paradis A-M, Garneau V, et al. Effects of Age, Sex, Body Mass Index and APOE Genotype on Cardiovascular Biomarker Response to an n-3 Polyunsaturated Fatty Acid Supplementation. *LFG*. 2013;6(2):73–82.
  60. Tremblay BL, Cormier H, Rudkowska I, Lemieux S, Couture P, Vohl M-C. Association between polymorphisms in phospholipase A2 genes and the plasma triglyceride response to an n-3 PUFA supplementation: a clinical trial. *Lipids in Health and Disease*. 2015 Feb 21;14(1):12.
  61. Bastien Vallée Marcotte, Cormier H, Guénard F, Rudkowska I, Lemieux S, Couture P, et al. Novel Genetic Loci Associated with the Plasma Triglyceride Response to an Omega-3 Fatty Acid Supplementation. *J Nutigenet Nutrigenomics*. 2016;9:1–11.
  62. Vallée Marcotte B, Guénard F, Marquis J, Charpagne A, Vadillo-Ortega F, Tejero ME, et al. Genetic Risk Score Predictive of the Plasma Triglyceride Response to an Omega-3 Fatty Acid Supplementation in a Mexican Population. *Nutrients* [Internet]. 2019 Mar 29 [cited 2020 Aug 3];11(4). Available from: <https://www.ncbi.nlm.nih.gov/pmc/articles/PMC6521301/>
  63. Vallée Marcotte B, Guénard F, Lemieux S, Couture P, Rudkowska I, Calder PC, et al. Fine mapping of genome-wide association study signals to identify genetic markers of the plasma triglyceride response to an omega-3 fatty acid supplementation.
  64. Vallée Marcotte B, Allaire J, Guénard F, de Toro-Martín J, Couture P, Lamarche B, et al. Genetic risk prediction of the plasma triglyceride response to independent supplementations with eicosapentaenoic and docosahexaenoic acids: the ComparED Study. *Genes Nutr*. 2020 Dec;15(1):10.
  65. Wu S-Y, Mayneris-Perxachs J, Lovegrove JA, Todd S, Yaqoob P. Fish-oil supplementation alters numbers of circulating endothelial progenitor cells and microparticles independently of eNOS genotype. *The American Journal of Clinical Nutrition*. 2014 Nov 1;100(5):1232–43.
  66. Zheng J-S, Chen J, Wang L, Yang H, Fang L, Yu Y, et al. Replication of a Gene-Diet Interaction at CD36, NOS3 and PPARG in Response to Omega-3 Fatty Acid Supplements on Blood Lipids: A Double-Blind Randomized Controlled Trial. *EBioMedicine*. 2018 Apr 17;31:150–6.
  67. Vallée Marcotte B, Guénard F, Lemieux S, Couture P, Rudkowska I, Calder PC, et al. Fine mapping of genome-wide association study signals to identify genetic markers of the plasma triglyceride response to an omega-3 fatty acid supplementation. *The American Journal of Clinical Nutrition*. 2019 Jan 1;109(1):176–85.

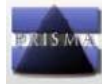

# PRISMA 2009 Checklist

| Section/topic                      | #  | Checklist item                                                                                                                                                                                                                                                                                              | Reported on page # |
|------------------------------------|----|-------------------------------------------------------------------------------------------------------------------------------------------------------------------------------------------------------------------------------------------------------------------------------------------------------------|--------------------|
| <b>TITLE</b>                       |    |                                                                                                                                                                                                                                                                                                             |                    |
| Title                              | 1  | Identify the report as a systematic review, meta-analysis, or both.                                                                                                                                                                                                                                         | 1                  |
| <b>ABSTRACT</b>                    |    |                                                                                                                                                                                                                                                                                                             |                    |
| Structured summary                 | 2  | Provide a structured summary including, as applicable: background; objectives; data sources; study eligibility criteria, participants, and interventions; study appraisal and synthesis methods; results; limitations; conclusions and implications of key findings; systematic review registration number. | 2                  |
| <b>INTRODUCTION</b>                |    |                                                                                                                                                                                                                                                                                                             |                    |
| Rationale                          | 3  | Describe the rationale for the review in the context of what is already known.                                                                                                                                                                                                                              | 3-5                |
| Objectives                         | 4  | Provide an explicit statement of questions being addressed with reference to participants, interventions, comparisons, outcomes, and study design (PICOS).                                                                                                                                                  | 5-6                |
| <b>METHODS</b>                     |    |                                                                                                                                                                                                                                                                                                             |                    |
| Protocol and registration          | 5  | Indicate if a review protocol exists, if and where it can be accessed (e.g., Web address), and, if available, provide registration information including registration number.                                                                                                                               | 5                  |
| Eligibility criteria               | 6  | Specify study characteristics (e.g., PICOS, length of follow-up) and report characteristics (e.g., years considered, language, publication status) used as criteria for eligibility, giving rationale.                                                                                                      | 5-6                |
| Information sources                | 7  | Describe all information sources (e.g., databases with dates of coverage, contact with study authors to identify additional studies) in the search and date last searched.                                                                                                                                  | 5, 7               |
| Search                             | 8  | Present full electronic search strategy for at least one database, including any limits used, such that it could be repeated.                                                                                                                                                                               | Suppl. T1          |
| Study selection                    | 9  | State the process for selecting studies (i.e., screening, eligibility, included in systematic review, and, if applicable, included in the meta-analysis).                                                                                                                                                   | 6-7                |
| Data collection process            | 10 | Describe method of data extraction from reports (e.g., piloted forms, independently, in duplicate) and any processes for obtaining and confirming data from investigators.                                                                                                                                  | 6-7                |
| Data items                         | 11 | List and define all variables for which data were sought (e.g., PICOS, funding sources) and any assumptions and simplifications made.                                                                                                                                                                       | 5-7                |
| Risk of bias in individual studies | 12 | Describe methods used for assessing risk of bias of individual studies (including specification of whether this was done at the study or outcome level), and how this information is to be used in any data synthesis.                                                                                      | 8-9                |
| Summary measures                   | 13 | State the principal summary measures (e.g., risk ratio, difference in means).                                                                                                                                                                                                                               | 9                  |





# PRISMA 2009 Checklist

|                      |    |                                                                                                                                                           |                                    |
|----------------------|----|-----------------------------------------------------------------------------------------------------------------------------------------------------------|------------------------------------|
| Synthesis of results | 14 | Describe the methods of handling data and combining results of studies, if done, including measures of consistency (e.g., $I^2$ ) for each meta-analysis. | NA (meta-analysis not appropriate) |
|----------------------|----|-----------------------------------------------------------------------------------------------------------------------------------------------------------|------------------------------------|

Page 1 of 2

| Section/topic                 | #  | Checklist item                                                                                                                                                                                           | Reported on page # |
|-------------------------------|----|----------------------------------------------------------------------------------------------------------------------------------------------------------------------------------------------------------|--------------------|
| Risk of bias across studies   | 15 | Specify any assessment of risk of bias that may affect the cumulative evidence (e.g., publication bias, selective reporting within studies).                                                             | Table 4            |
| Additional analyses           | 16 | Describe methods of additional analyses (e.g., sensitivity or subgroup analyses, meta-regression), if done, indicating which were pre-specified.                                                         | 11-12              |
| <b>RESULTS</b>                |    |                                                                                                                                                                                                          |                    |
| Study selection               | 17 | Give numbers of studies screened, assessed for eligibility, and included in the review, with reasons for exclusions at each stage, ideally with a flow diagram.                                          | Figure 1           |
| Study characteristics         | 18 | For each study, present characteristics for which data were extracted (e.g., study size, PICOS, follow-up period) and provide the citations.                                                             | Tables 1 and 2     |
| Risk of bias within studies   | 19 | Present data on risk of bias of each study and, if available, any outcome level assessment (see item 12).                                                                                                | Table 4            |
| Results of individual studies | 20 | For all outcomes considered (benefits or harms), present, for each study: (a) simple summary data for each intervention group (b) effect estimates and confidence intervals, ideally with a forest plot. | Tables 1 and 2     |
| Synthesis of results          | 21 | Present results of each meta-analysis done, including confidence intervals and measures of consistency.                                                                                                  | NA                 |
| Risk of bias across studies   | 22 | Present results of any assessment of risk of bias across studies (see Item 15).                                                                                                                          | Table 4            |
| Additional analysis           | 23 | Give results of additional analyses, if done (e.g., sensitivity or subgroup analyses, meta-regression [see Item 16]).                                                                                    | 11-12, Table 3     |
| <b>DISCUSSION</b>             |    |                                                                                                                                                                                                          |                    |
| Summary of evidence           | 24 | Summarize the main findings including the strength of evidence for each main outcome; consider their relevance to key groups (e.g., healthcare providers, users, and policy makers).                     | Table 3, 34-39     |
| Limitations                   | 25 | Discuss limitations at study and outcome level (e.g., risk of bias), and at review-level (e.g., incomplete retrieval of identified research, reporting bias).                                            | 45-46              |
| Conclusions                   | 26 | Provide a general interpretation of the results in the context of other evidence, and implications for future research.                                                                                  | 40-47              |
| <b>FUNDING</b>                |    |                                                                                                                                                                                                          |                    |



# PRISMA 2009 Checklist

|         |    |                                                                                                                                            |    |
|---------|----|--------------------------------------------------------------------------------------------------------------------------------------------|----|
| Funding | 27 | Describe sources of funding for the systematic review and other support (e.g., supply of data); role of funders for the systematic review. | 47 |
|---------|----|--------------------------------------------------------------------------------------------------------------------------------------------|----|

From: Moher D, Liberati A, Tetzlaff J, Altman DG, The PRISMA Group (2009). Preferred Reporting Items for Systematic Reviews and Meta-Analyses: The PRISMA Statement. PLoS Med 6(7): e1000097. doi:10.1371/journal.pmed1000097  
For more information, visit: [www.prisma-statement.org](http://www.prisma-statement.org).

Page 2 of 2

For peer review only

# BMJ Open

## A systematic review of nutrigenetics, omega-3 and plasma lipids/lipoproteins/apolipoproteins with evidence evaluation using the GRADE approach

|                                 |                                                                                                                                                                                                                                                                                                                                                                                                                                                                                                                                                                                                                                                                                                                                                                                                                                                                                                                                                                                                                                                                                                                                                                                                                                                                                       |
|---------------------------------|---------------------------------------------------------------------------------------------------------------------------------------------------------------------------------------------------------------------------------------------------------------------------------------------------------------------------------------------------------------------------------------------------------------------------------------------------------------------------------------------------------------------------------------------------------------------------------------------------------------------------------------------------------------------------------------------------------------------------------------------------------------------------------------------------------------------------------------------------------------------------------------------------------------------------------------------------------------------------------------------------------------------------------------------------------------------------------------------------------------------------------------------------------------------------------------------------------------------------------------------------------------------------------------|
| Journal:                        | <i>BMJ Open</i>                                                                                                                                                                                                                                                                                                                                                                                                                                                                                                                                                                                                                                                                                                                                                                                                                                                                                                                                                                                                                                                                                                                                                                                                                                                                       |
| Manuscript ID                   | bmjopen-2021-054417.R3                                                                                                                                                                                                                                                                                                                                                                                                                                                                                                                                                                                                                                                                                                                                                                                                                                                                                                                                                                                                                                                                                                                                                                                                                                                                |
| Article Type:                   | Original research                                                                                                                                                                                                                                                                                                                                                                                                                                                                                                                                                                                                                                                                                                                                                                                                                                                                                                                                                                                                                                                                                                                                                                                                                                                                     |
| Date Submitted by the Author:   | 27-Jan-2022                                                                                                                                                                                                                                                                                                                                                                                                                                                                                                                                                                                                                                                                                                                                                                                                                                                                                                                                                                                                                                                                                                                                                                                                                                                                           |
| Complete List of Authors:       | Keathley, Justine; Université Laval, Centre Nutrition, Santé et Société (NUTRISS), Institut sur la Nutrition et les Aliments Fonctionnels (INAF) Quebec, QC, CAN; Université Laval, School of Nutrition Quebec, QC, CAN<br>Garneau, Véronique; Université Laval, Centre Nutrition, Santé et Société (NUTRISS), Institut sur la Nutrition et les Aliments Fonctionnels (INAF); Université Laval, School of Nutrition<br>Marcil, Valérie ; University of Montreal, Department of Nutrition; Sainte-Justine University Health Centre, Research Centre<br>Mutch, David; University of Guelph, Department of Human Health and Nutritional Sciences<br>Robitaille, Julie; Laval University, Centre Nutrition, Santé et Société (NUTRISS), Institut sur la Nutrition et les Aliments Fonctionnels (INAF); Laval University, School of Nutrition<br>Rudkowska, Iwona; Université Laval, Department of Kinesiology; Centre de recherche du CHU de Quebec-Université Laval, Endocrinology and Nephrology Unit<br>Sofian, Gabriela; Université Laval, Library<br>Desroches, Sophie; Université Laval<br>Vohl, Marie-Claude; Université Laval, Centre Nutrition, Santé et Société (NUTRISS), Institut sur la Nutrition et les Aliments Fonctionnels (INAF); Université Laval, School of Nutrition |
| <b>Primary Subject Heading</b>: | Nutrition and metabolism                                                                                                                                                                                                                                                                                                                                                                                                                                                                                                                                                                                                                                                                                                                                                                                                                                                                                                                                                                                                                                                                                                                                                                                                                                                              |
| Secondary Subject Heading:      | Cardiovascular medicine, Genetics and genomics, Nutrition and metabolism                                                                                                                                                                                                                                                                                                                                                                                                                                                                                                                                                                                                                                                                                                                                                                                                                                                                                                                                                                                                                                                                                                                                                                                                              |
| Keywords:                       | NUTRITION & DIETETICS, GENETICS, Lipid disorders < DIABETES & ENDOCRINOLOGY                                                                                                                                                                                                                                                                                                                                                                                                                                                                                                                                                                                                                                                                                                                                                                                                                                                                                                                                                                                                                                                                                                                                                                                                           |
|                                 |                                                                                                                                                                                                                                                                                                                                                                                                                                                                                                                                                                                                                                                                                                                                                                                                                                                                                                                                                                                                                                                                                                                                                                                                                                                                                       |

SCHOLARONE™  
Manuscripts



I, the Submitting Author has the right to grant and does grant on behalf of all authors of the Work (as defined in the below author licence), an exclusive licence and/or a non-exclusive licence for contributions from authors who are: i) UK Crown employees; ii) where BMJ has agreed a CC-BY licence shall apply, and/or iii) in accordance with the terms applicable for US Federal Government officers or employees acting as part of their official duties; on a worldwide, perpetual, irrevocable, royalty-free basis to BMJ Publishing Group Ltd ("BMJ") its licensees and where the relevant Journal is co-owned by BMJ to the co-owners of the Journal, to publish the Work in this journal and any other BMJ products and to exploit all rights, as set out in our [licence](#).

The Submitting Author accepts and understands that any supply made under these terms is made by BMJ to the Submitting Author unless you are acting as an employee on behalf of your employer or a postgraduate student of an affiliated institution which is paying any applicable article publishing charge ("APC") for Open Access articles. Where the Submitting Author wishes to make the Work available on an Open Access basis (and intends to pay the relevant APC), the terms of reuse of such Open Access shall be governed by a Creative Commons licence – details of these licences and which [Creative Commons](#) licence will apply to this Work are set out in our licence referred to above.

Other than as permitted in any relevant BMJ Author's Self Archiving Policies, I confirm this Work has not been accepted for publication elsewhere, is not being considered for publication elsewhere and does not duplicate material already published. I confirm all authors consent to publication of this Work and authorise the granting of this licence.

1 ***A systematic review of nutrigenetics, omega-3 and plasma***  
2 ***lipids/lipoproteins/apolipoproteins with evidence evaluation using the***  
3 ***GRADE approach***

4 Justine Keathley, PhD, RD<sup>1,2</sup>; Véronique Garneau, MSc, RD<sup>1</sup>; Valérie Marcil<sup>3,4</sup>, PhD, David M  
5 Mutch, PhD<sup>5</sup>, Julie Robitaille, PhD, RD<sup>1,2</sup>, Iwona Rudkowska, PhD, RD<sup>6,7</sup>, Gabriela Sofian,  
6 MSI<sup>8</sup>, Sophie Desroches, PhD, RD<sup>1,2</sup>; **Marie-Claude Vohl, PhD<sup>1,2</sup>\*\***

7 <sup>1</sup> Centre Nutrition, Santé et Société (NUTRISS), Institut sur la Nutrition et les Aliments  
8 Fonctionnels (INAF), Université Laval, Québec City, Québec, G1V 0A6, Canada

9 <sup>2</sup> School of Nutrition, Université Laval, Québec City, Québec, G1V 0A6, Canada

10 <sup>3</sup> Research Centre, Sainte-Justine University Health Centre, Montréal, Québec, H3T 1C5, Canada

11 <sup>4</sup> Department of Nutrition, Université de Montréal, Montréal, Québec, H3T 1J4, Canada

12 <sup>5</sup> Department of Human Health and Nutritional Sciences, University of Guelph, Guelph, Ontario,  
13 N1G 2W1, Canada

14 <sup>6</sup> Endocrinology and Nephrology Unit, CHU de Québec-Université Laval Research Center, Québec  
15 City, Québec, G1V 0A6, Canada

16 <sup>7</sup> Department of Kinesiology, Université Laval, Québec City, Québec, G1V 0A6, Canada

17 <sup>8</sup> Library, Université Laval, Québec City, Québec, G1V 0A6, Canada

18 **\*\*Corresponding Author: marie-claude.vohl@fsaa.ulaval.ca; Tel.: +1-418-656-2131 (ext.  
19 404676)**

20 **Ethics Approval Statement:** No ethics approval was required for a systematic review.

21 **Running Head:** Nutrigenetics, omega-3 and lipids/lipoproteins  
22 Data described in the manuscript will be made available upon request pending approval  
23 from the corresponding author.

24 **Abbreviations:** ALA (alpha-linolenic acid); CV (coefficient of variation); DHA  
25 (docosahexaenoic acid); EPA (eicosapentaenoic acid); FDA (Food and Drug  
26 Administration); GRADE (Grading of Recommendations Assessment, Development and  
27 Evaluation); HCP (healthcare professional); LD (linkage disequilibrium); nutri-GRS  
28 (nutrigenetic risk score); SNP (single nucleotide polymorphism)

## 29 ABSTRACT

30 **Objectives:** Despite the uptake of nutrigenetic testing through direct-to-consumer  
31 services and healthcare professionals, systematic reviews determining scientific validity  
32 are limited in this field. The objective of this review was to: retrieve, synthesize and  
33 assess the quality of evidence (confidence) for nutrigenetic approaches related to the  
34 effect of genetic variation on plasma lipid, lipo- and apolipoprotein responsiveness to  
35 omega-3 fatty acid intake.

36 **Design:** A systematic review was conducted using three search engines (Embase, Web of  
37 Science and Medline) for articles published up until August 1, 2020. We aimed to  
38 systematically search, identify (select), and provide a narrative synthesis of all studies  
39 that assessed nutrigenetic associations/interactions for genetic variants (comparators)  
40 influencing the plasma lipid, lipoprotein and/or apolipoprotein response (outcomes) to  
41 omega-3 fatty acid intake (intervention/exposure) in humans – both pediatric and adult  
42 populations (population). We further aimed to assess the overall quality of evidence for  
43 specific priority nutrigenetic associations/interactions based on the following inclusion  
44 criteria: nutrigenetic associations/interactions reported for the same genetic variants  
45 (comparators) influencing the same plasma lipid, lipoprotein and/or apolipoprotein  
46 response (outcomes) to omega-3 fatty acid intake (intervention/exposure) in humans –  
47 both pediatric and adult populations (population) in two independent studies, irrespective  
48 of the findings. Risk of bias was assessed in individual studies. Evidence was evaluated  
49 using the GRADE approach with a modification to further consider biological  
50 plausibility. This systematic review was registered with PROSPERO  
51 (CRD42020185087).

52 **Results:** Out of 1830 articles screened, 65 met the inclusion criteria for the narrative  
53 synthesis ( $n=23$  observational,  $n=42$  interventional); of these, 25 met the inclusion  
54 criteria for GRADE evidence evaluation. Overall, current evidence is insufficient for  
55 gene-diet associations related to omega-3 fatty acid intake on plasma apolipoproteins,  
56 total cholesterol, HDL-cholesterol, LDL-cholesterol and LDL particle size. However,  
57 there is strong (GRADE rating: moderate quality) evidence to suggest that male *APOE*-  
58 E4 carriers (rs429358, rs7412) exhibit significant triglyceride reductions in response to  
59 omega-3-rich fish oil with a dose-response effect. Moreover, strong (GRADE rating: high  
60 quality) evidence suggests that a 31-SNP nutrigenetic risk score can predict plasma  
61 triglyceride responsiveness to omega-3-rich fish oil in adults with overweight/obesity  
62 from various ethnicities.

63 **Conclusions:** Most evidence in this area is weak, but two specific nutrigenetic  
64 interactions exhibited strong evidence, with limited generalizability to specific  
65 populations.

66 **Keywords:** nutrigenomics, nutrigenetics, nutritional genomics, genetic risk score,  
67 nutrigenetic risk score, triglycerides, lipids, lipoproteins, omega-3 fatty acid, *APOE*

## 68 STRENGTHS AND LIMITATIONS

- 1  
2  
3 69 - Strength: Comprehensive systematic review guided by PRISMA  
4 70 - Strength: Critical appraisal of the evidence guided by GRADE with a  
5 71 modification to further consider biological plausibility in addition to the standard  
6 72 components of the GRADE approach  
7  
8 73 - Limitation: Inability to conduct a meta-analysis given the comprehensive  
9 74 overview of studies and thus heterogeneity  
10 75 - Limitation: Several included studies without replication; most evidence was low  
11 76 or very low quality according to GRADE  
12  
13  
14  
15  
16  
17  
18  
19  
20  
21  
22  
23  
24  
25  
26  
27  
28  
29  
30  
31  
32  
33  
34  
35  
36  
37  
38  
39  
40  
41  
42  
43  
44  
45  
46  
47  
48  
49  
50  
51  
52  
53  
54  
55  
56  
57  
58  
59  
60

For peer review only

## 77 INTRODUCTION

78

79 Cardiometabolic disease is a health concern worldwide (1). Nutrigenetic research  
80 demonstrates that there is significant inter-individual variability in cardiometabolic risk  
81 factor levels, in part based on a combination of genetic and nutrition-related risk factors  
82 (2,3). For example, protein intake has consistently been shown to influence measures of  
83 body weight and composition dependent on *FTO* genotype (rs9939609 or loci in strong  
84 linkage disequilibrium) (4,5). Consumers indicate great interest in personalized nutrition  
85 based on genetics (6,7), however, a lack of industry oversight (8,9) has led to highly  
86 variable scientific validity of nutrigenetic tests available to consumers. While recognizing  
87 that some groups question whether genetic testing for personalized nutrition is ready for  
88 ‘prime time’, Gorman and colleagues suggested that there are certain specific nutrigenetic  
89 interactions with strong evidence that could be considered for implementation into  
90 clinical practice by expert committees who are responsible for creating dietary guidelines  
91 (10). With this in mind, systematic reviews that include an evaluation of levels of  
92 evidence are urgently needed in order to determine if there are any nutrigenetic  
93 associations that may warrant potential implementation into practice.

94 The dominant omega-3 polyunsaturated fatty acids are eicosapentaenoic acid (EPA) and  
95 docosahexaenoic acid (DHA), which typically come from marine sources (e.g. fish oil),  
96 and alpha-linolenic acid (ALA), which are rich in plant sources (e.g., canola oil) (11,12).  
97 It is well established that higher intakes of omega-3 fatty acids from foods or  
98 supplements (herein after referred to collectively as “omega-3s”), particularly from long-  
99 chain EPA and DHA, tend to improve indicators of cardiometabolic health (12,13). In



1  
2  
3 100 terms of their lipid and lipoprotein lowering effects, omega-3s have consistently  
4  
5 101 demonstrated an impact on triglycerides (TG) (14). High-quality evidence from  
6  
7 102 population-based studies suggests that long-chain omega-3s (EPA and DHA) reduce  
8  
9 103 plasma TG by about 15% (14). There is also high-quality evidence suggesting that EPA  
10  
11 104 and DHA can raise high-density lipoprotein (HDL) cholesterol (14). Other studies have  
12  
13 105 further demonstrated a relationship between omega-3 and HDL-cholesterol (15), low-  
14  
15 106 density lipoprotein (LDL)-cholesterol (15), total cholesterol (16–18), apolipoproteins  
16  
17 107 (19), and LDL particle size (20). Despite several studies with significant findings for  
18  
19 108 these outcomes, when reviewing the evidence, studies have demonstrated conflicting  
20  
21 109 results for the impact of omega-3 on many lipid profile outcomes (14). Genetic variation  
22  
23 110 could explain this heterogeneity. EPA and DHA have been shown to significantly impact  
24  
25 111 the expression of thousands of genes including those involved in inflammatory and  
26  
27 112 atherogenic pathways (21,22). Evidence now demonstrates that the health impacts of  
28  
29 113 omega-3 intake could differ based on genetic variation (23,24). Despite the potential for  
30  
31 114 omega-3s to have a significant positive impact on health outcomes, population intakes of  
32  
33 115 omega-3s tend to be low (25). While the World Health Organization's Adequate Intake  
34  
35 116 level for adults is 200-250 mg EPA+DHA daily (26,27), the mean reported intake of  
36  
37 117 EPA+DHA in the United States is only approximately 100 mg daily (25). Nutrigenetic  
38  
39 118 interventions have the potential to motivate improvements in dietary intake beyond  
40  
41 119 population-based interventions (28). Additionally, evidence suggests that genetic  
42  
43 120 variability affects health responses to omega-3s (23). Thus, critically appraising and  
44  
45 121 grading the evidence for nutrigenetic interactions related to omega-3s and plasma lipids,  
46  
47 122 lipoproteins and apolipoproteins is an important research priority. The most recent  
48  
49  
50  
51  
52  
53  
54  
55  
56  
57  
58  
59

1  
2  
3 123 systematic review on nutrigenetic interactions related to omega-3s and intermediate  
4  
5 124 phenotypes of cardiovascular disease was conducted nearly a decade ago, and this study  
6  
7  
8 125 did not evaluate the quality of evidence using an established methodology (29).  
9

10 126 Therefore, we aimed to provide a comprehensive summary of current evidence related to  
11  
12 127 inter-individual variability in plasma lipid, lipoprotein and apolipoprotein responses to  
13  
14 128 omega-3 intake (plant and marine sources) based on genetic variations. Overall, the  
15  
16  
17 129 specific objectives of this study were as follows:

18  
19  
20 130 **Objective 1.** Systematically search, identify (select), and provide a narrative  
21  
22 131 synthesis of all studies that assessed nutrigenetic associations/interactions for genetic  
23  
24 132 variants (comparators; i.e. outcomes in those with a specific genotype for a genetic  
25  
26 133 variant compared to a different genotype) influencing the plasma lipid, lipoprotein  
27  
28 134 and/or apolipoprotein response (outcomes) to omega-3 fatty acid intake  
29  
30 135 (intervention/exposure) in humans – both pediatric and adult populations  
31  
32 136 (population).  
33  
34  
35

36  
37 137 **Objective 2.** Assess the overall quality of evidence for specific priority nutrigenetic  
38  
39 138 associations/interactions based on the following inclusion criteria: nutrigenetic  
40  
41 139 associations/interactions reported for the same genetic variants (comparators)  
42  
43 140 influencing the same plasma lipid, lipoprotein and/or apolipoprotein response  
44  
45 141 (outcomes) to omega-3 fatty acid intake (intervention/exposure) in humans – both  
46  
47 142 pediatric and adult populations (population) in two independent studies, irrespective  
48  
49 143 of the findings.  
50  
51  
52

53  
54 144  
55  
56  
57  
58  
59  
60

1  
2  
3 **145 Methods**

4 146  
5 147 **Patient and Public Involvement:** No patient involvement.

6  
7  
8 148 *Literature Search*

9  
10  
11 149 The systematic review protocol was registered with PROSPERO (CRD42020185087).  
12  
13 150 The review process was guided by previously established methods, including a  
14  
15 151 previously outlined five-step systematic review process (30,31). The search engines  
16  
17 152 Embase, Web of Science and Medline OVID were used to conduct the search starting in  
18  
19 153 May 2020 and screen for articles meeting inclusion criteria, using the comprehensive  
20  
21 154 search terms outlined in Supplementary Table 1, properly combined by Boolean  
22  
23 155 operators. The literature was searched up until August 1, 2020 (there was no minimum  
24  
25 156 start date; any article published prior to this date was included in the search). A PRISMA  
26  
27 157 diagram (Figure 1) guided the article screening process (32).  
28  
29  
30  
31  
32

33 158 *Inclusion and Exclusion Criteria*

34  
35  
36 159 Original studies were included if they were written in English or French. Inclusion  
37  
38 160 criteria were developed using the Population, Intervention, Comparison, Outcomes,  
39  
40 161 (PICO) and Population, Exposure, Comparison, Outcomes (PECO) methods (33,34) for  
41  
42 162 interventional and observational research, respectively. These are detailed in Table 1 for  
43  
44 163 each study objective.  
45  
46  
47  
48

49 164 **Table 1. PICO/PECO for Study Objectives**

| PICO/PECO for Objective 1: |                                                                               |
|----------------------------|-------------------------------------------------------------------------------|
| Population                 | Human studies (adult and pediatric)                                           |
| Intervention/<br>Exposure  | Omega-3s (total omega-3 or various types; supplemental and/or dietary intake) |

|                                    |                                                                                                                                                                                  |
|------------------------------------|----------------------------------------------------------------------------------------------------------------------------------------------------------------------------------|
| Comparison                         | Genetic variation                                                                                                                                                                |
| Outcomes                           | HDL-cholesterol, LDL-cholesterol, LDL particle size, total cholesterol, apolipoproteins, and/or TG                                                                               |
| <b>PICO/PECO for Objective 2*:</b> |                                                                                                                                                                                  |
| Population                         | Human studies (adult and pediatric)                                                                                                                                              |
| Intervention/<br>Exposure          | Omega-3s (total omega-3 or various types; supplemental and/or dietary intake)                                                                                                    |
| Comparison                         | Genetic variation in the same genetic location [gene(s) and SNP(s)]                                                                                                              |
| Outcomes                           | The same outcome of interest among studies with the same genetic comparators: HDL-cholesterol, LDL-cholesterol, LDL particle size, total cholesterol, apolipoproteins, and/or TG |

165 \*Nutrigenetic associations/interactions were included in objective 2, **in the evidence grading**  
 166 **process**, irrespective of the findings, provided that they had been reported in at least two  
 167 independent studies on the same gene(s) and SNP(s), and the same plasma outcome.

168 There were no limitations to the population characteristics (all populations/patient  
 169 samples were included). Animal studies were excluded. Dietary interventions and  
 170 observational studies involving omega-3s (total omega-3 or various types; supplemental  
 171 and/or dietary intake) and comparing lipid and/or lipoprotein and/or apolipoprotein  
 172 outcomes between different genetic variations based on omega-3 dietary or supplemental  
 173 intake (and not blood fatty acid levels; e.g. EPA and DHA in red blood cells) were  
 174 included in the narrative synthesis. In included studies, samples had to be stratified on the  
 175 basis of genetic variation. Specific lipid and lipoprotein outcomes of interest were: HDL-  
 176 cholesterol, LDL-cholesterol, LDL particle size, total cholesterol, apolipoproteins, and  
 177 triglycerides (TG). Studies that reported ratios of the aforementioned lipid parameters  
 178 (e.g. HDL-cholesterol to total cholesterol ratio) were also included. Both observational  
 179 and interventional studies were included, as well as single-gene, polygenic and genome-  
 180 wide association studies (GWAS). Differences in study designs and methods were  
 181 considered when developing the overall evidence grades, as further detailed below.  
 182 Associations/interactions reported in two independent studies formed the basis of the  
 183 inclusion criteria for objective 2, in which nutrigenetic associations/interactions were

184 prioritized for evidence grading. This is further detailed in Table 1 and the section below  
185 entitled “Evidence Grading.”

### 186 *Article Selection and Data Extraction*

187 Two independent investigators (JK and VG) screened articles using the computer  
188 software *Covidence* (including title, abstract, and full-text screening) and extracted data  
189 from the included articles. Reference lists of included articles and of a systematic review  
190 on a similar topic (35) were also screened for relevant articles. Data extraction templates  
191 were piloted by two independent investigators (JK and VG) on ten included studies and  
192 revised accordingly. The final data extraction templates included the following  
193 components for each study: first author name and year, study design, genetic approach,  
194 population and sample size, study duration (interventional studies only), genes and single  
195 nucleotide polymorphisms (SNPs) analyzed with rs numbers, quantity and type of  
196 omega-3, comparisons (e.g. a control group or different amount/type of omega-3s as well  
197 as genetic grouping), lipid/lipoprotein outcome(s), whether or not the study reported that  
198 they followed STREGA guidelines and a summary of statistically significant study  
199 findings relevant to the research question. Corresponding authors of included studies  
200 were contacted as needed to provide clarity and/or additional information about the  
201 included studies.

### 202 *Evidence Grading*

203 Upon reading all full-text articles included, and summarizing the body of evidence  
204 (Tables 2 and 3), SNPs/nutrigenetic risk scores (nutri-GRSs) and subsequent  
205 lipid/lipoprotein/apolipoprotein outcomes were systematically prioritized and selected for

1  
2  
3 206 evidence grading, if a specific nutrigenetic association/interaction was reported in at least  
4  
5 207 two independent studies. To clarify, this refers to the same SNP(s)/nutri-GRS [or SNPs  
6  
7 208 in strong linkage disequilibrium (LD)] being assessed and influencing the same  
8  
9 209 lipid/lipoprotein outcome in at least two studies. For these nutrigenetic  
10  
11 210 associations/interactions, we proceeded with evidence grading, while including **all**  
12  
13 211 studies relevant to the particular nutrigenetic association/interaction, irrespective of the  
14  
15 212 findings. Consistency of results was then one of several factors considered when grading  
16  
17 213 the body of evidence. The Grading of Recommendations Assessment, Development and  
18  
19 214 Evaluation (GRADE) approach indicates that a single study rarely (if ever) results in  
20  
21 215 strong evidence, but two studies (typically RCTs) can indicate strong evidence if they are  
22  
23 216 graded highly using the GRADE criteria (36). Prior to selecting the nutrigenetic  
24  
25 217 associations/interactions (genetic variants and lipid/lipoprotein/apolipoprotein outcomes)  
26  
27 218 for evidence grading, LD was assessed using the SNIPA SNP Annotator Software (37)  
28  
29 219 for genes located on the same chromosome and arm (determined using the Online  
30  
31 220 Mendelian Inheritance in Man® [OMIM] database) as outlined in the summary of  
32  
33 221 results' tables in the column labelled 'Cytogenic Location of Gene(s)' (Tables 1 and 2).  
34  
35 222 Strong LD was defined as  $r^2 > 0.8$  and location  $< 250$  kb away from the index SNP  
36  
37 223 location. SNPs in strong LD were considered together for the purposes of evidencing  
38  
39 224 grading.

40  
41 225 Based on our abovementioned predetermined criteria for specific nutrigenetic topic  
42  
43 226 selection for evidence grading, nutrigenetic associations/interactions that were not  
44  
45 227 included in the evidence grading process likely have weak evidence (at minimum due to  
46  
47 228 lack of replication, for example, *ZNT8* rs13266634 and HDL-c or TG responsiveness to  
48  
49  
50  
51  
52  
53  
54  
55  
56  
57  
58  
59  
60

1  
2  
3 229 omega-3, which has only been assessed in a single study (38)). According to the GRADE  
4  
5 230 guidelines, when only a single study exists indicating significant findings for an outcome  
6  
7 231 of interest (especially when the study is observational), the overall quality of the evidence  
8  
9 232 is generally rated to be low or very low (39). Therefore, our process for prioritizing  
10  
11 233 nutrigenetic topics for evidence grading aimed to filter out specific nutrigenetic  
12  
13 234 associations/interactions that would likely be deemed low or very low quality (based on,  
14  
15 235 at minimum, lack of replication). Two authors (JK and VG) critically appraised the  
16  
17 236 selected nutrigenetic interactions using the GRADE methodology, with one modification  
18  
19 237 (39,40). The modified GRADE approach consisted of the additional consideration of  
20  
21 238 biological plausibility whereby evidence was considered for upgrading if there was  
22  
23 239 evidence of biological plausibility for the nutrigenetic interaction. Nutrigenetic  
24  
25 240 interactions were grouped according to studies assessing the same SNP(s)/nutri-GRS and  
26  
27 241 lipid/lipoprotein/apolipoprotein outcome, and the quality of the body of evidence (studies  
28  
29 242 with significant and non-significant results) was rated; this process was guided by the  
30  
31 243 GRADE Evidence Profile, which included consideration of risk of bias, inconsistency,  
32  
33 244 indirectness, imprecision, publication bias, plausible confounding, dose-response and  
34  
35 245 other factors (39). For example, different sources of omega-3s (e.g. EPA+DHA vs. ALA;  
36  
37 246 food sources vs. supplementation) were taken into consideration when grading the  
38  
39 247 evidence through the analysis of indirectness within the modified GRADE approach  
40  
41 248 (39,40). Risk of bias was assessed in each of the included interventional and  
42  
43 249 observational studies using the National Institutes of Health Study Quality Assessment  
44  
45 250 Tools, in line with recently published recommendations for risk of bias assessments (41).  
46  
47 251 To assess measures of precision, coefficients of variation (CV) were calculated based on  
48  
49  
50  
51  
52  
53  
54  
55  
56  
57  
58  
59  
60

1  
2  
3 252 outcome means (mean change or absolute values – whichever was used for the analyses)  
4  
5 253 and standard deviations. In cases where standard errors of the mean were reported, these  
6  
7  
8 254 were converted to standard deviations to calculate the CV. The nutrigenetic interactions  
9  
10 255 were each given an evidence grade of high, moderate, low or very low.  
11  
12

## 13 256 **Results**

14 257  
15 258 Figure 1 outlines the PRISMA Flow Diagram, which was used to guide the systematic  
16  
17  
18 259 review. Supplementary Tables 2 and 3 provide a summary of the 65 included studies. The  
19  
20 260 results columns of Supplementary Tables 2 and 3 (far right) indicate nutrigenetic findings  
21  
22 261 that were statistically significant. There were many results from the included studies that  
23  
24 262 were not statistically significant. It is important to highlight that any results related to the  
25  
26 263 studies' analyzed SNPs and outcomes of interest that were not statistically significant are  
27  
28 264 not indicated in the results column. No studies explicitly reported that they followed  
29  
30 265 STREGA guidelines. LD analysis of SNPs tested in different studies revealed strong LD  
31  
32 266 in several SNPs from the *FADS* gene cluster (see Table 2 footnote). As such, LD was  
33  
34 267 taken into consideration in the selection of nutrigenetic interactions selected for evidence  
35  
36 268 grading.  
37  
38  
39  
40  
41

### 42 269 *Observational Studies*

43  
44  
45 270 Of the 65 included studies, 23 were observational with the majority of these being cross-  
46  
47 271 sectional, as outlined in Supplementary Table 2. A total of 62,221 participants were  
48  
49 272 included in the observational studies. These studies assessed correlations among a  
50  
51 273 number of different genetic variations and outcomes, with several studies assessing  
52  
53 274 genetic variations in the *FADS* gene cluster (42–48), *TNF $\alpha$*  (49–51) and *PPAR $\alpha$*  (52–54).  
54  
55  
56  
57  
58  
59  
60



1  
2  
3 275 Most studies (n=13) assessed total omega-3s (38,42,47–49,51,54–60). The intake and  
4  
5 276 type of omega-3s, lipid/lipoprotein/apolipoprotein outcomes and associations revealed  
6  
7  
8 277 from these studies were variable as further detailed in Supplementary Table 2. In the  
9  
10 278 observational studies assessing genetic variation in the *FADS* gene cluster, some studies  
11  
12 279 indicated significant gene-diet findings related to HDL-cholesterol, LDL-cholesterol, TG,  
13  
14 280 total-cholesterol while other studies demonstrated no significant gene-diet interactions for  
15  
16 281 these outcomes thus indicating notable inconsistency among the results, while  
17  
18  
19 282 considering that SNPs differed by studies (42–48). In the observational studies focused  
20  
21 283 on genetic variation in the *TNF $\alpha$*  gene, there was some evidence of a gene-diet  
22  
23 284 relationship for omega-3 and LDL-cholesterol, total-cholesterol and total-  
24  
25 285 cholesterol:HDL-cholesterol ratio, but again, results differed between studies (49–51).  
26  
27 286 For gene-diet relationships and *PPAR $\alpha$*  genetic variation, individual studies indicated  
28  
29 287 significant findings related to total-cholesterol, LDL-cholesterol, TG, apoC-III and LDL  
30  
31 288 peak particle diameter (52–54). Comprehensive details of the observational studies are  
32  
33 289 outlined in Supplementary Table 2.  
34  
35  
36  
37

### 38 290 *Interventional Studies*

39  
40  
41  
42 291 Of the 65 included studies, 42 were interventional including 16 randomized trials. Non-  
43  
44 292 randomized studies included single arm clinical trials and sequential non-randomized  
45  
46 293 cross-over interventions. For interventional studies, n=6,225 participants upon combining  
47  
48 294 all sample sizes of the included studies. Again, these studies assessed relationships  
49  
50 295 between a number of different genetic variants and study outcomes. In more recent years,  
51  
52 296 several studies (n=8) used a nutri-GRS or polygenic approaches (61–68) given the  
53  
54 297 plausibility that many gene-lipid/lipoprotein/apolipoprotein and omega-3 interactions are  
55  
56  
57  
58  
59  
60

1  
2  
3 298 polygenic in nature. Numerous studies assessed genetic variations in the *FADS* gene  
4  
5 299 cluster (61,62,69–71), *APOE* (61,71–80), *CD36* (67,81,82), *PPAR $\gamma$ 2* (62,67,83–85) and  
6  
7 300 *PPAR $\alpha$*  (83,86,87). Among these studies, results related to significant gene-diet (omega-  
8  
9 301 3) associations influencing lipid/lipoprotein outcomes were generally inconsistent except  
10  
11 302 for *APOE* (rs429358 and rs7412), omega-3 and TG in males only (71–75,77–80), and for  
12  
13 303 a 31-SNP nutri-GRS, omega-3 and TG (65,66). There was also consistent evidence to  
14  
15 304 indicate a lack of association among *PPAR $\gamma$ 2* (rs1801282) genetic variation, EPA+DHA  
16  
17 305 and LDL cholesterol (62,67,84,85,88). Most studies (n=40) used supplemental EPA  
18  
19 306 and/or DHA sources of omega-3s for the dietary intervention (see Supplementary Table  
20  
21 307 3). The dosage/intake and type of omega-3s were variable with EPA and/or DHA dosages  
22  
23 308 ranging from 0.5-3.7 g/day across different studies, and one study with an ALA  
24  
25 309 intervention dosage of 8.1 g/day, as further detailed in Table 3.  
26  
27  
28  
29  
30

### 31 *Levels of Evidence Using GRADE*

32  
33  
34  
35 311 A total of 25 articles were included in the evidence grading process, representing 11  
36  
37 312 unique nutrigenetic associations/interactions as outlined in Tables 2 and 3, and  
38  
39 313 Supplementary Table 4. Through the modified GRADE process, it was determined that  
40  
41 314 there is strong evidence (GRADE rating: moderate quality) for *APOE* genotypes (rs7412,  
42  
43 315 rs429358), omega-3s and TG lowering in male adults only (71–75,77–80). This evidence  
44  
45 316 suggests that adult males (but not females) with the *APOE*-E3/E4 or E4/E4 genotype  
46  
47 317 (rs429358, rs7412) tend to experience significant reductions in TG in response to 0.7-3.7  
48  
49 318 g/day of EPA and/or DHA, with higher dosages demonstrating greater TG lowering  
50  
51 319 effects (71–75,77–80). Furthermore, it was determined that there is strong evidence  
52  
53 320 (GRADE rating: high quality) for using a 31-SNP nutri-GRS (detailed in Supplementary  
54  
55  
56  
57  
58  
59  
60

1  
2  
3 321 Tables 5 and 6) to assess the effectiveness of omega-3s for TG lowering in adults with  
4  
5 322 overweight/obesity in various ethnicities (65,66). The evidence suggests that in adults  
6  
7 323 with overweight/obesity, lower genetic risk scores demonstrate greater responsiveness to  
8  
9 324 omega-3 supplementation (65,66).

10  
11  
12  
13 325 All other evidence that was evaluated was determined to be weak (GRADE rating: low or  
14  
15 326 very low quality), as further detailed in Table 2. Imprecision, indirectness, and  
16  
17 327 inconsistency were common reasons for downgrading the evidence (refer to Table 2  
18  
19 328 footnote). There was evidence for a plausible mechanism of action for most of the  
20  
21 329 nutrigenetic interactions that were graded; evidence of a dose response was less common.  
22  
23  
24  
25  
26  
27  
28  
29  
30  
31  
32  
33  
34  
35  
36  
37  
38  
39  
40  
41  
42  
43  
44  
45  
46  
47  
48  
49  
50  
51  
52  
53  
54  
55  
56  
57  
58  
59  
60

**Table 2. GRADE Evidence Profile: Genetic Variation, Omega-3 and Lipids**

| Nutrigenetic interactions for omega-3 and plasma lipid/lipoprotein outcomes                                                                                                                                                         |                                  |                                    |                                   |                                       |                  |                           |                                   |                    |                                                                                                                                                                                            |
|-------------------------------------------------------------------------------------------------------------------------------------------------------------------------------------------------------------------------------------|----------------------------------|------------------------------------|-----------------------------------|---------------------------------------|------------------|---------------------------|-----------------------------------|--------------------|--------------------------------------------------------------------------------------------------------------------------------------------------------------------------------------------|
| Patient or Population: adults<br>Intervention/Exposure: dietary or supplemental omega-3 (EPA and/or DHA and/or ALA)<br>Comparison/Control: genetic variation, different omega-3 intakes<br>Outcomes: plasma lipids and lipoproteins |                                  |                                    |                                   |                                       |                  |                           |                                   |                    |                                                                                                                                                                                            |
| Gene rs Number and Lipid: Number and Type of Studies (total n)                                                                                                                                                                      | Limitations                      | Inconsistency                      | Indirectness                      | Imprecision                           | Publication Bias | Dose Response             | Biological Plausibility*          | Quality            | Conclusion                                                                                                                                                                                 |
| <b>CD36 rs1761667 and HDL-c:</b><br>1 RCT and 1 single arm trial (n=115) (81,89)                                                                                                                                                    | Serious limitations <sup>a</sup> | Serious inconsistency <sup>b</sup> | Serious indirectness <sup>c</sup> | Serious imprecision <sup>d</sup>      | Undetected       | No evidence of a gradient | Evidence of a mechanism of action | ⊕⊕⊖⊖<br>(Low)      | Weak evidence suggests that possessing the GA or possibly the AA genotype of <i>CD36</i> rs1761667 could lead to significant increases in HDL-c in response to 0.8-3.0 g/day of omega-3s.  |
| <b>CD36 rs1761667 and TG:</b><br>1 RCT and 1 single arm trial (n=115) (81,89)                                                                                                                                                       | Serious limitations <sup>a</sup> | Serious inconsistency <sup>b</sup> | Serious indirectness <sup>c</sup> | Serious imprecision <sup>e</sup>      | Undetected       | No evidence of a gradient | Evidence of a mechanism of action | ⊕⊕⊖⊖<br>(Low)      | Weak evidence suggests that possessing the GA or possibly the GG genotype of <i>CD36</i> rs1761667 could lead to significant reductions in TG in response to 0.8-3.0 g/day of omega-3s.    |
| <b>CD36 rs1049673 and HDL-c:</b><br>1 RCT and 1 single arm trial (n=115) (81,89)                                                                                                                                                    | Serious limitations <sup>a</sup> | Serious inconsistency <sup>b</sup> | Serious indirectness <sup>c</sup> | No serious imprecision                | Undetected       | No evidence of a gradient | Evidence of a mechanism of action | ⊕⊕⊖⊖<br>(Low)      | Weak evidence suggests that possessing the CG or possibly the CC genotype of <i>CD36</i> rs1049673 could lead to significant increases in HDL-c in response to 0.8-3.0 g/day of omega-3s.  |
| <b>CD36 rs1527483 and TG:</b><br>1 RCT and 1 single arm trial (n=250) (67,81)                                                                                                                                                       | Serious limitations <sup>f</sup> | No serious inconsistency           | Serious indirectness <sup>g</sup> | Very serious imprecision <sup>e</sup> | Undetected       | No evidence of a gradient | Evidence of a mechanism of action | ⊕⊕⊖⊖<br>(Low)      | Weak evidence suggests that possessing the GG genotype of <i>CD36</i> rs1527483 could lead to significant decreases in TG in response to approximately 2.0 g/day of EPA+DHA (but not ALA). |
| <b>APOE rs429358, rs7412 and TG:</b> 4 RCTs and 5 single arm trials (1 single arm trial consisted of a                                                                                                                              | No serious limitations           | No serious inconsistency           | Serious indirectness <sup>h</sup> | No serious imprecision                | Undetected       | Evidence of a gradient    | Evidence of a mechanism of action | ⊕⊕⊕⊖<br>(Moderate) | Strong evidence suggests that adult males (but not females) with the <i>APOE</i> -E3/E4 or E4/E4 genotype (rs429358, rs7412) experience significant reductions in TG in                    |

1  
2  
3  
4  
5  
6  
7  
8  
9  
10  
11  
12  
13  
14  
15  
16  
17  
18  
19  
20  
21  
22  
23  
24  
25  
26  
27  
28  
29  
30  
31  
32  
33  
34  
35  
36  
37  
38  
39  
40  
41  
42  
43  
44  
45  
46  
47

|                                                                                                                                                                                                                                           |                                        |                                         |                                        |                                  |            |                                     |                                                     |                                                                              |                                                                                                                                                                                                                                                                                                                                                                                                                                                  |
|-------------------------------------------------------------------------------------------------------------------------------------------------------------------------------------------------------------------------------------------|----------------------------------------|-----------------------------------------|----------------------------------------|----------------------------------|------------|-------------------------------------|-----------------------------------------------------|------------------------------------------------------------------------------|--------------------------------------------------------------------------------------------------------------------------------------------------------------------------------------------------------------------------------------------------------------------------------------------------------------------------------------------------------------------------------------------------------------------------------------------------|
| subset sample of another single arm trial) (n=980) (71-75,77-80)                                                                                                                                                                          |                                        |                                         |                                        |                                  |            |                                     |                                                     |                                                                              | response to 0.7-3.7 g/day of EPA and/or DHA. Higher dosages may have greater TG lowering effects.                                                                                                                                                                                                                                                                                                                                                |
| <b>APOE rs429358, rs7412 and Total-c:</b> 4 RCTs, 5 single arm trials (1 single arm trial consisted of a subset sample of another single arm trial), 1 cross-sectional and longitudinal analysis within an RCT (n=2,446) (55,71-75,77-80) | No serious limitations                 | Serious inconsistency <sup>i</sup>      | Serious indirectness <sup>h</sup>      | No serious imprecision           | Undetected | No evidence of a gradient           | Lack of evidence of a mechanism of action           | ⊕⊕⊕⊖<br>(Moderate: Males and Females)<br><br>and<br><br>⊕⊕⊖⊖<br>(Low: Males) | In males and females combined, strong evidence suggests that there is no nutrigenetic interaction between EPA and/or DHA, <i>APOE</i> (rs429358, rs7412) and total-c. There is no evidence of a nutrigenetic interaction between ALA, <i>APOE</i> (rs429358, rs7412) and total-c. In male subgroups, weak evidence suggests that there is no nutrigenetic interaction between ALA or EPA and/or DHA, <i>APOE</i> (rs429358, rs7412) and total-c. |
| <b>31-SNP Nutri-GRS and TG:</b> 1 RCT, 1 single arm trial (n=330) (65,66)                                                                                                                                                                 | No serious limitations                 | No serious inconsistency                | Serious indirectness <sup>j</sup>      | No serious imprecision           | Undetected | Evidence of a gradient <sup>k</sup> | Some evidence of a mechanism of action <sup>l</sup> | ⊕⊕⊕⊕<br>High                                                                 | Strong evidence suggests that in adults with overweight/obesity, a 31-SNP genetic risk score can predict TG responsiveness to EPA+DHA supplementation. Individuals with lower genetic risk scores demonstrate greater responsiveness to EPA+DHA for TG lowering.                                                                                                                                                                                 |
| <b>PPARG2 rs1801282 and LDL-c:</b> 4 RCTs, 1 single arm trial (n=670) (62,67,84,85,88)                                                                                                                                                    | No serious limitations                 | No serious inconsistency                | Serious indirectness <sup>m</sup>      | Serious imprecision <sup>n</sup> | Undetected | No evidence of a gradient           | Lack of evidence of a mechanism of action           | ⊕⊕⊕⊖<br>(Moderate)                                                           | Strong evidence suggests that genetic variation in <i>PPARG2</i> (rs1801282) does not influence LDL-c responses to omega-3s (EPA+DHA).                                                                                                                                                                                                                                                                                                           |
| <b>PPARG2 rs1801282 and Total-c:</b> 4 RCTs, 1 single arm trial (n=670) (62,67,84,85,88)                                                                                                                                                  | No serious limitations                 | Serious inconsistency <sup>o</sup>      | Serious indirectness <sup>m</sup>      | Serious imprecision <sup>n</sup> | Undetected | No evidence of a gradient           | Lack of evidence of a mechanism of action           | ⊕⊕⊖⊖<br>(Low)                                                                | Weak evidence suggests that possessing the CG or GG genotype of <i>PPARG2</i> (rs1801282) could lead to significant increases in total-c in response to approximately 3 g/day of omega-3s (EPA+DHA) in individuals with overweight or obesity, but not for individuals without overweight or obesity.                                                                                                                                            |
| <b>PPARG2 rs1801282 and TG:</b> 4 RCTs, 1 single arm trial (n=670) (62,67,84,85,88)                                                                                                                                                       | No serious limitations                 | Very serious inconsistency <sup>p</sup> | Serious indirectness <sup>m</sup>      | Serious imprecision <sup>n</sup> | Undetected | No evidence of a gradient           | Evidence of a mechanism of action                   | ⊕⊕⊖⊖<br>(Low)                                                                | Weak evidence suggests that genetic variation in <i>PPARG2</i> (rs1801282) does not influence total-c responses to omega-3s (EPA+DHA), but when dietary total fat and saturated fat intake are low, nutrigenetic interactions may exist.                                                                                                                                                                                                         |
| <b>FADS (rs174547**) and Total-c:</b> 2 RCTs, 1 single-arm trial, 4 cross-                                                                                                                                                                | Very serious risk of bias <sup>q</sup> | No serious inconsistency                | Very serious indirectness <sup>r</sup> | Serious imprecision <sup>n</sup> | Undetected | No evidence of a gradient           | Evidence of a mechanism of action                   | ⊕⊖⊖⊖<br>(Very Low)                                                           | Weak evidence suggests that genetic variation in <i>FADS</i> (rs174547**) does not influence total-c responses to omega-3.                                                                                                                                                                                                                                                                                                                       |

1  
2  
3  
4  
5  
6  
7  
8  
9  
10  
11  
12  
13  
14  
15  
16  
17  
18  
19  
20  
21  
22  
23  
24  
25  
26  
27  
28  
29  
30  
31  
32  
33  
34  
35  
36  
37  
38  
39  
40  
41  
42  
43  
44  
45  
46  
47

|                                                      |  |  |  |  |  |  |  |  |  |
|------------------------------------------------------|--|--|--|--|--|--|--|--|--|
| sectional studies (n=9365)<br>(44,45,47,48,61,69,71) |  |  |  |  |  |  |  |  |  |
|------------------------------------------------------|--|--|--|--|--|--|--|--|--|

\*Direct mechanisms of action were considered

\*\*FADS rs174547 was in strong LD with the following SNPs from other included studies and therefore these SNPs were also included in the selection of studies assessing FADS genetic variation, n-3 intake and LDL-c: rs174546, rs174599, rs174601, rs174583, rs1353, rs174561, rs174556, rs174545, rs174537 and rs174576.

HDL-c: high-density lipoprotein cholesterol, LDL-c: low-density lipoprotein cholesterol, TG: triglycerides, total-c: total cholesterol

- a. Small sample sizes, especially among homozygous groups in the RCT (with a larger heterozygous group, potentially affecting the results)
- b. Some variation in results by genotype
- c. One study sample consisted of all males while the other sample consisted of both men and women; differences in age and n-3 dosages (with some overlap)
- d. Coefficient of variation >1 for all significant values
- e. Coefficient of variation substantially >1 for several values
- f. Small sample size within genotype groups for minor allele homozygote and heterozygote groups in the RCT
- g. One study sample consisted of all men while the other consisted of men and postmenopausal women with type 2 diabetes
- h. Differences in age, omega-3 dosages, and types (with some overlap), and dietary interventions even when considering studies with male study samples separate from male + female study samples
- i. Serious inconsistency for men subgroup only; men + women samples were consistent
- j. EPA and DHA separate on one study and EPA+DHA in the other, sample stratified into two groups in one study (responders and non-responders) and separated into three groups (responders, non-responders and adverse responders)
- k. Evidence of a gradient for GRS and TG responsiveness to omega-3 supplementation
- l. Some evidence of a potential mechanism of action for *IQCJ-SCHIP1*, *NXP1*, *PHF17*, *MYB* and *NELL1* as discussed by Rudkowska et al. (63), Vallée Marcotte et al. (64)
- m. Differences in population (healthy adults, adults with chronic disease or obesity, infants), some variation in length of follow-up
- n. Downgraded precision as it was not possible to assess precision in most studies due to lack of reporting of means and SD/SEM
- o. Some variation in results even when considering differences in BMI and populations among studies
- p. Major variability in results even when considering differences in BMI and populations among studies
- q. Risk of bias detected in every study except one
- r. Major differences in populations, types and amounts of omega-3 and follow-up for interventional studies

**Table 3. Summary of Risk of Bias Across SNPs and Outcomes Following Omega-3 Exposure/Intervention**

| <i>CD36, rs1761667 and HDL-c</i>          |              |
|-------------------------------------------|--------------|
| Study                                     | Risk of Bias |
| Dawczynski et al. 2013                    | ⊖            |
| Madden et al. 2008                        | ⊖            |
| <i>CD36, rs1761667 and TG</i>             |              |
| Study                                     | Risk of Bias |
| Dawczynski et al. 2013                    | ⊖            |
| Madden et al. 2008                        | ⊖            |
| <i>CD36, rs1049673 and HDL-c</i>          |              |
| Study                                     | Risk of Bias |
| Dawczynski et al. 2013                    | ⊖            |
| Madden et al. 2008                        | ⊖            |
| <i>CD36, rs1527483 and TG</i>             |              |
| Study                                     | Risk of Bias |
| Zheng et al. 2018                         | ⊕            |
| Madden et al. 2008                        | ⊖            |
| <i>ApoE, rs429358, rs7412 and TG</i>      |              |
| Study                                     | Risk of Bias |
| AbuMweis et al. 2018                      | ⊖            |
| Carvalho-Wells et al. 2012                | ⊕            |
| Caslake et al. 2008                       | ⊕            |
| Dang et al. 2015                          | ⊕            |
| Jackson et al. 2012                       | ⊖            |
| Minihane et al. 2000                      | ⊕            |
| Olano-Martin et al. 2010                  | ⊕            |
| Paschos et al. 2005                       | ⊖            |
| Thifault et al. 2013                      | ⊕            |
| <i>ApoE, rs429358, rs7412 and Total-c</i> |              |
| Study                                     | Risk of Bias |
| AbuMweis et al. 2018                      | ⊖            |
| Carvalho-Wells et al. 2012                | ⊕            |
| Caslake et al. 2008                       | ⊕            |
| Dang et al. 2015                          | ⊕            |
| Fallaize et al. 2016                      | ⊖            |
| Jackson et al. 2012                       | ⊖            |
| Minihane et al. 2000                      | ⊕            |
| Olano-Martin et al. 2010                  | ⊕            |
| Paschos et al. 2005                       | ⊖            |
| Thifault et al. 2013                      | ⊕            |
| <i>31-SNP Nutri-GRS and TG</i>            |              |
| Study                                     | Risk of Bias |
| Vallée Marcotte et al. 2019               | ⊕            |
| Vallée Marcotte et al. 2020               | ⊕            |

| <i>PPARG2, rs1801282 and LDL-c</i>   |              |
|--------------------------------------|--------------|
| Study                                | Risk of Bias |
| Binia et al. 2017                    | ⊖            |
| Harslof et al. 2014                  | ⊕            |
| Itariu et al. 2012                   | ⊕            |
| Lindi et al. 2003                    | ⊖            |
| Zheng et al. 2018                    | ⊕            |
| <i>PPARG2, rs1801282 and Total-c</i> |              |
| Study                                | Risk of Bias |
| Binia et al. 2017                    | ⊖            |
| Harslof et al. 2014                  | ⊕            |
| Itariu et al. 2012                   | ⊕            |
| Lindi et al. 2003                    | ⊖            |
| Zheng et al. 2018                    | ⊕            |
| <i>PPARG2, rs1801282 and TG</i>      |              |
| Study                                | Risk of Bias |
| Binia et al. 2017                    | ⊖            |
| Harslof et al. 2014                  | ⊕            |
| Itariu et al. 2012                   | ⊕            |
| Lindi et al. 2003                    | ⊖            |
| Zheng et al. 2018                    | ⊕            |
| <i>FADS, rs174547 and Total-c</i>    |              |
| Study                                | Risk of Bias |
| AbuMweis et al. 2018                 | ⊖            |
| Alsaleh et al. 2014                  | ⊕            |
| Lu et al. 2010                       | ⊖            |
| Standl et al. 2012                   | ⊖            |
| Dumont et al. 2011                   | ⊖            |
| Dumont et al. 2018                   | ⊖            |
| Roke and Mutch 2014                  | ⊖            |

⊕ no serious risk of bias; ⊖ serious risk of bias; ⊖⊖ very serious risk of bias (for study design type using NIH Study Quality Assessment Tools)

HDL-c: high-density lipoprotein cholesterol, LDL-c: low-density lipoprotein cholesterol, TG: triglycerides, total-c: total cholesterol



1  
2  
3 271 **DISCUSSION**

4 272  
5 273 Overall, this systematic review found strong evidence (i.e. GRADE ratings: moderate and  
6  
7  
8 274 high quality evidence) for only a limited amount of evidence in this area: *APOE*  
9  
10 275 (rs429358 and rs7412) genotypes and TG responsiveness to omega-3s in men, and a 31-  
11  
12 276 SNP nutri-GRS and TG responsiveness to omega-3s in adults with overweight/obesity.  
13  
14 277 Limited evidence exists for individual genetic-based responsiveness of omega-3s on  
15  
16 278 apolipoprotein and/or LDL particle size, with no studies from the present comprehensive  
17  
18 279 review meeting the criteria for evidence grading. This highlights the need for more  
19  
20 280 replication studies in this area. While more research exists on omega-3 responsiveness for  
21  
22 281 other lipid outcomes such as total-c, HDL-c and LDL-c, the level of evidence for  
23  
24 282 nutrigenetic interactions related to these outcomes remains low. Again, more studies are  
25  
26 283 needed related to these outcomes, including replication studies of previously identified  
27  
28 284 nutrigenetic interactions. These studies should first replicate the interventions (i.e. use the  
29  
30 285 same type and amount of omega-3s as the original study), and recruit samples with  
31  
32 286 similar characteristics to the original study. Once replication is established, research  
33  
34 287 should then seek to expand the population studied to improve generalizability and explore  
35  
36 288 the effectiveness of different interventions (i.e. different formulations and doses of  
37  
38 289 omega-3s). The variability of the interventions and sample sizes in the studies conducted  
39  
40 290 to date often resulted in the quality of evidence being downgraded (see Table 2). It should  
41  
42 291 also be noted that study heterogeneity precluded the ability to conduct a meta-analysis.  
43  
44 292 Thus, the GRADE approach worked well for evaluating the quality of the evidence given  
45  
46 293 that this approach takes into consideration several factors when determining the quality of  
47  
48  
49  
50  
51  
52  
53  
54  
55  
56  
57  
58  
59  
60

1  
2  
3 294 evidence such as risk of bias, indirectness of evidence, inconsistency or results,  
4  
5 295 imprecision and publication bias (39).

6  
7  
8 296

9  
10 297 It is important to note that our results demonstrating strong evidence for interactions  
11  
12 298 between *APOE* genotypes and lipid responses to omega-3s have notable ethical  
13  
14 299 implications. Compared to non-carriers, carriers of *APOE*-E4 have a 15 times greater risk  
15  
16 300 of developing Alzheimer's disease (90). Moreover, *APOE* genotypes are significantly  
17  
18 301 associated with CVD risk including risk of coronary artery disease and hyperlipidemia  
19  
20 302 (91–93). Interestingly, the pathology of Alzheimer's disease has been linked to  
21  
22 303 cardiovascular mechanisms (90). Future research should explore nutrigenetic interactions,  
23  
24 304 with risk of developing Alzheimer's disease as the study endpoint/outcome of interest.  
25  
26 305 Despite the current lack of knowledge about how diet may play a role in mitigating the  
27  
28 306 genetic-based risk of Alzheimer's disease, several potentially modifiable risk factors  
29  
30 307 account for around 40% of dementia and Alzheimer's disease globally (94), and the link  
31  
32 308 between Alzheimer's disease risk and *APOE* is well-established (95). Therefore, despite  
33  
34 309 the strong scientific validity identified in the present review, there are other factors that  
35  
36 310 must be considered before this test can be recommended for implementation in a practice  
37  
38 311 setting; this includes ethical, legal and social implications (96).  
39  
40  
41  
42  
43  
44  
45  
46

47 312  
48 313 In addition, our finding of strong evidence for *APOE* genotypes and TG responsiveness  
49  
50 314 to omega-3s in men but not women speaks to the importance of taking biological sex into  
51  
52 315 account in nutrigenetics research. The importance of this has been further highlighted  
53  
54 316 elsewhere, where it has been noted that the results of nutrition and nutrigenetic research  
55  
56  
57  
58  
59  
60

1  
2  
3 317 may differ in men and women (97). For example, UDP-glucuronidation isoenzyme  
4  
5 318 expression profiles have been demonstrated to be regulated by sex hormones, and thus  
6  
7 319 sex-specific differences in glucuronidation of resveratrol have been observed (98). As  
8  
9  
10 320 more studies are completed, researchers may find that certain nutrigenetic interactions  
11  
12 321 differ depending on biological sex, ethnicity, age or other factors, similar to our findings  
13  
14 322 on *APOE*, omega-3s and TG in which there was robust evidence of a nutrigenetic  
15  
16 323 interaction in males only. Researchers may also find explanations for this, which are  
17  
18 324 currently poorly understood. In general, it is becoming increasingly recognized that  
19  
20 325 health-related responses to different interventions may vary based on biological sex; this  
21  
22 326 is an important consideration of personalized nutrition (97). Nutrigenetic research often  
23  
24 327 groups men and women together, but stratifying based on biological sex could provide  
25  
26 328 further insights for specific nutrigenetic interactions and could also help explain why  
27  
28 329 some replication studies have had conflicting findings (97). Moreover, biomedical  
29  
30 330 research in general historically has been conducted more in men than women; yet such  
31  
32 331 research findings are often generalized to women despite limited research conducted in  
33  
34 332 samples of women, which is problematic for a number of reasons (99). In the present  
35  
36 333 review, the evidence was strong for the *APOE* findings in men only, but not women in  
37  
38 334 part because there were more studies conducted in men. Specifically, there were five  
39  
40 335 studies conducted in men and women (combined) (71,73,74,100,101), and four studies  
41  
42 336 conducted in samples of only men (75,78,79,102), yet no studies conducted in samples of  
43  
44 337 only women. This brings to light important issues of equity and warrants further  
45  
46 338 discussion and consideration.  
47  
48  
49  
50  
51  
52  
53  
54 339

1  
2  
3 340 As research continues to develop, it appears likely that lipid and lipoprotein responses are  
4  
5 341 polygenic in nature. Therefore, future research should consider using nutri-GRSs or other  
6  
7 342 polygenic methods of assessing responsiveness to nutrition interventions. This work  
8  
9  
10 343 should use unbiased approaches or non-hypothesis driven approach to derive nutri-GRSs,  
11  
12 344 such as establishing them from genetic-wide association studies. In addition to the two  
13  
14 345 studies meeting the criteria for evidence grading (65,66), a modified version of the 31-  
15  
16 346 SNP GRS was tested in men and women in the FINGEN study, using 23 of the 31 SNPs  
17  
18 347 (65). While this did not meet our inclusion criteria for evidence grading given that a  
19  
20 348 different GRS was used, the 23-SNP GRS was significantly associated with TG  
21  
22 349 responsiveness to omega-3 supplementation in this population as well, providing further  
23  
24 350 evidence for the scientific validity of this nutrigenetic interaction (65).  
25  
26  
27  
28  
29

30  
31 352 While we used a modified version of the GRADE approach (with the additional  
32  
33 353 consideration of biological plausibility) to evaluate the body of evidence, several tools are  
34  
35 354 available for evaluating the quality of scientific evidence, though no generally accepted  
36  
37 355 methods exist for nutrigenetic research specifically. In 2017, Grimaldi et al. proposed a  
38  
39 356 set of guidelines to assess the scientific validity of genotype-based dietary advice (30).  
40  
41  
42 357 While we originally intended to use these guidelines for assessing the evidence, we came  
43  
44 358 across some limitations that ultimately led us to use the GRADE guidelines. Specifically,  
45  
46 359 Grimaldi et al. (2017) suggested that only studies that include STREGA guidelines  
47  
48 360 should be included in the assessment of scientific validity (30). However, limiting the  
49  
50 361 evidence to only these studies could result in several important studies being missed. In  
51  
52  
53 362 the present review, none of the included studies explicitly indicated that they followed  
54  
55  
56  
57  
58  
59  
60

1  
2  
3 363 STREGA guidelines. In addition, it was recommended by Grimaldi et al. to use STREGA  
4  
5 364 guidelines to assess risk of bias (30). However, the STREGA checklist is only intended  
6  
7 365 for observational genetic association studies - not interventional research (103). In the  
8  
9 366 present review, 42 of the 65 included studies were interventional (65%) (Supplementary  
10  
11 367 Table 3). In addition, the STREGA guidelines are intended to improve the transparency  
12  
13 368 and adequate reporting of genetic association studies, but it is not intended to be used as a  
14  
15 369 study quality assessment tool (103). However, Grimaldi et al. nicely highlighted the  
16  
17 370 importance of understanding the nature of the genetic variation, at a functional level,  
18  
19 371 when assessing scientific validity (30). This is not included in the standard GRADE  
20  
21 372 approach but is an important niche component of nutrigenetic research. As such, an  
22  
23 373 analysis of functional SNPs (biological plausibility) was included as an additional  
24  
25 374 component of the standard GRADE process, as indicated in the methods section above.  
26  
27 375 Overall, we found that the methods used in this systematic review were effective and can  
28  
29 376 be used to synthesize and evaluate nutrigenetic studies assessing other gene-nutrient-  
30  
31 377 health outcome interactions.  
32  
33  
34  
35  
36  
37  
38  
39

40 379 The additional consideration of functional SNPs to the standard GRADE approach helped  
41  
42 380 to strengthen this review, as biological mechanistic evidence can help ensure that study  
43  
44 381 findings did not occur by chance alone, and this is a component of evidence evaluation  
45  
46 382 frameworks in medical genetics (104,105). Transcriptomic and pathway analyses can  
47  
48 383 help inform the direction of future nutrigenetic studies by generating hypotheses about  
49  
50 384 the impact of specific genetic variations on varying responses to nutrition on health-  
51  
52 385 related outcomes. For example, using transcriptomics and pathway analyses to identify  
53  
54  
55  
56  
57  
58  
59  
60

1  
2  
3 386 changes in lipid metabolism following omega-3 supplementation, Rudkowska and  
4  
5 387 colleagues identified six genes expressed in opposite directions between responders and  
6  
7 388 non-responders to omega-3 supplementation for TG lowering: *FADS2*, *PLA2G4A*,  
8  
9  
10 389 *ALOX15*, *PEMT*, *MGLL* and *GPAM* (106). Tremblay et al. then built on this knowledge  
11  
12 390 and discovered that *PLA2G6* rs132989, *PLA2G7* rs679667, *PLA2G2D* rs12045689,  
13  
14 391 *PLA2G4A* rs10752979 and rs1160719 together explained 5.9% of post- omega-3  
15  
16 392 supplementation TG levels, with several individual *PLA2G4A* SNPs also having a  
17  
18 393 significant impact on the TG lowering effect of omega-3 supplementation (107). Others  
19  
20 394 have built on this mechanistic knowledge as well (108). Future research should now seek  
21  
22 395 to replicate this work given that we found that there have been no replication studies  
23  
24 396 completed and thus, this research (107,108) did not meet the criteria for evidence  
25  
26 397 grading.

27  
28  
29  
30  
31 398  
32  
33 399 In the current body of literature, there are some limitations that should be highlighted.  
34  
35 400 Given the variability in allele frequencies for each SNP, it should be noted that study  
36  
37 401 limitations can arise with small sample sizes whereby some genotype groups may not be  
38  
39 402 adequately powered to detect significant differences. For example, Dawczynski et al.  
40  
41 403 (2013) detected significant changes in TG among the GA genotype group of *CD36*  
42  
43 404 rs1761667 (n=18) in response to omega-3s but neither of the homozygote groups (AA:  
44  
45 405 n=8, GG: n=7) exhibited a significant difference, despite similar directions and  
46  
47 406 magnitudes of effect among the GA and GG genotypes (82). It is thus possible that this  
48  
49 407 study was not adequately powered. Some researchers aim to mitigate this issue of small  
50  
51 408 numbers by grouping minor allele carriers together (i.e. heterozygotes + homozygotes for  
52  
53  
54  
55  
56  
57  
58  
59  
60

1  
2  
3 409 the minor allele) (69). However, such an approach precludes the possibility to detect an  
4  
5 410 allele-dosage effect. From a physiological perspective, an allele dosage effect would be  
6  
7 411 expected whereby a significant change among a heterozygote group would likely be  
8  
9 412 accompanied by a significant change in one of the homozygote groups but with an even  
10  
11 413 greater magnitude of the effect. This consideration highlights the importance of having an  
12  
13 414 adequately powered sample size, while factoring in the prevalence of each genotype.  
14  
15  
16  
17 415

18  
19 416 While single SNP research provides important information about individual gene-nutrient  
20  
21 417 interactions, the results of this review indicate that individual responses to omega-3s for  
22  
23 418 altering lipids, lipoproteins and apolipoproteins appear to be polygenic in nature. Thus,  
24  
25 419 we encourage researchers to further explore the use of nutri-GRSs to improve the  
26  
27 420 accuracy of genetic-based predictions. See, for example, the work of Vallée Marcotte et  
28  
29 421 al., which obtained a high quality evidence grade in the present review (65,66). This is  
30  
31 422 further exemplified in the analyses recently conducted by Chen et al. (42), which has yet  
32  
33 423 to be replicated and thus was not selected for evidence grading.  
34  
35  
36  
37 424

38  
39 425 The present analysis of scientific validity provides an important first step towards the  
40  
41 426 eventual development of clinical practice guidelines for genetic-based responses to  
42  
43 427 dietary intake. With questionable and variable scientific validity of existing consumer  
44  
45 428 nutrigenetic tests, the development of clinical practice guidelines is an important next  
46  
47 429 step as these can be used by HCPs and industry alike to help promote evidence-based  
48  
49 430 practice in personalized nutrition. Ideally, industry should use future clinical practice  
50  
51 431 guidelines to inform the nutrigenetic associations and related dietary recommendations  
52  
53  
54  
55  
56  
57  
58  
59  
60

1  
2  
3 432 included in their reports. Decision aids can also be useful to guide clinical practice for  
4  
5 433 HCPs (109), and future research should seek to develop a decision aid related to omega-  
6  
7 434 3s and lipid/lipoprotein outcomes based on genetic variation.  
8  
9

10 435

11  
12 436 It should be noted that there are some limitations to the present systematic review. First,  
13  
14 437 the literature was searched up until August 2020; as such, any articles published after this  
15  
16 438 date were not included. Furthermore, certain nutrigenetic associations/interactions were  
17  
18 439 prioritized for evidence grading therefore evidence grades remain unknown for numerous  
19  
20 440 associations/interactions included in the narrative synthesis. However, evidence from a  
21  
22 441 single study typically results in an evidence grade of low or very low using the GRADE  
23  
24 442 approach (39), therefore it is unlikely that any/many nutrigenetic associations/interactions  
25  
26 443 with strong scientific validity (which could be considered for use in clinical practice)  
27  
28 444 were missed. Future research groups may choose to instead select a specific SNP or nutri-  
29  
30 445 GRS as the focus of future systematic reviews. The specific SNP or nutri-GRS chosen  
31  
32 446 may be selected based on the results of a preliminary scoping review. This would allow  
33  
34 447 for all articles included in the systematic review to undergo evidence grading. The  
35  
36 448 approach taken in the present review was more comprehensive, but has its limitations as  
37  
38 449 stated above.  
39  
40  
41  
42  
43  
44

45 450

46  
47 451 Overall, we have provided a comprehensive overview the body of evidence related to  
48  
49 452 nutrigenetics, omega-3s and plasma lipids/lipoproteins/apolipoproteins, while providing  
50  
51 453 an overview of levels of evidence in this field. To our knowledge, this is the first  
52  
53 454 systematic review with GRADE evidence evaluation in the broader field of nutrigenetics.  
54  
55  
56  
57  
58  
59



1  
2  
3 455 The results of this work should be used in clinical practice guideline development, to  
4  
5 456 ultimately guide evidence-based practice in personalized nutrition and move this  
6  
7 457 emerging field forward.  
8  
9

10 458  
11 459 **Sources of Support:** J.K. received postdoctoral fellowships from the Canadian Institute of  
12 460 Health Research, NUTRISS and INAF. I.R. holds a Junior 2 research Scholar from the Fonds de  
13 461 recherche du Québec—Santé (FRQ-S). M-C.V. holds a Tier 1 Canada Research Chair in  
14 462 Nutrition Applied to Genetics and Metabolic Health.  
15

16 463  
17 464 **Contributorship Statements:** M-C.V. and J.K. conceptualized the review. G.S. was responsible  
18  
19 465 for the search strategy, in collaboration with J.K., M-C.V., S.D. and V.G. J.K. and V.G. were  
20  
21 466 responsible for article screening and selection, summarizing, evidence grading, and developing a  
22  
23 467 draft of the systematic review. The first systematic review draft underwent revisions from S.D. and  
24  
25 468 M-C.V., who provided overall supervision for the project. Following this, J.K., V.G., V.M.,  
26  
27 469 D.M.M., J.R., I.R., G.S., S.D., and M-C.V. served as scientific advisors and reviewed and revised  
28  
29 470 the full-text manuscript. J.K. wrote the first draft of the manuscript. J.K., V.G., V.M., D.M.M., J.R.,  
30  
31 471 I.R., G.S., S.D., and M-C.V., reviewed, revised and approved the final manuscript.  
32  
33

34 472 **Competing Interests:** The authors have no competing interests to declare.  
35  
36

37 473 **Funding:** This project was supported through a pilot projects grant from INAF. J Keathley was  
38  
39 474 supported through postdoctoral fellowships from CIHR (#430907), NUTRISS and INAF. M-C  
40  
41 475 Vohl holds a Canada Research Chair in Genomics Applied to Nutrition and Metabolic Health.  
42  
43

44 476 **Data Sharing Statement:** Data are available upon reasonable request.  
45  
46

47 477  
48

49 478  
50  
51  
52  
53  
54  
55  
56  
57  
58  
59  
60

1  
2  
3  
4  
5  
6  
7  
8  
9  
10  
11  
12  
13  
14  
15  
16  
17  
18  
19  
20  
21  
22  
23  
24  
25  
26  
27  
28  
29  
30  
31  
32  
33  
34  
35  
36  
37  
38  
39  
40  
41  
42  
43  
44  
45  
46  
47  
48  
49  
50  
51  
52  
53  
54  
55  
56  
57  
58  
59  
60

479 **Figure Legend:**

480

481 **Figure 1. PRISMA Flow Diagram**

482 \*The original PRISMA Flow Diagram indicated the number of studies included in meta-analysis in this  
483 box. This has been revised for the purposes of this research

For peer review only

## References

1. Barquera S, Pedroza-Tobias A, Medina C, Hernandez-Barrera L, Bibbins-Domingo K, Lozano R, et al. Global overview of the epidemiology of atherosclerotic cardiovascular disease. *Arch Med Res*. 2015;46:328–38.
2. Rudkowska I, Guénard F, Julien P, Couture P, Lemieux S, Barbier O, et al. Genome-wide association study of the plasma triglyceride response to an n-3 polyunsaturated fatty acid supplementation. *J Lipid Res*. 2014 Jul;55(7):1245–53.
3. Rizzi F, Conti C, Dogliotti E, Terranegra A, Salvi E, Braga D, et al. Interaction between polyphenols intake and PON1 gene variants on markers of cardiovascular disease: a nutrigenetic observational study. *Journal of Translational Medicine*. 2016;14:186.
4. Zhang X, Qi Q, Zhang C, Smith SR, Hu FB, Sacks FM, et al. FTO Genotype and 2-Year Change in Body Composition and Fat Distribution in Response to Weight-Loss Diets: The POUNDS LOST Trial. *Diabetes*. 2012 Nov 1;61(11):3005–11.
5. Merritt DC, Jamnik J, El-Sohemy A. FTO genotype, dietary protein intake, and body weight in a multiethnic population of young adults: a cross-sectional study. *Genes Nutr*. 2018;13:4.
6. Vallée Marcotte B, Cormier V, Garneau V, Robitaille J, Desroches S, Vohl M-C. Nutrigenetic Testing for Personalized Nutrition: An Evaluation of Public Perceptions, Attitudes, and Concerns in a Population of French Canadians. *Lifestyle Genomics* [Internet]. 2019; Available from: <https://doi.org/10.1159/000499626>
7. Vallée Marcotte B, Cormier H, Garneau V, Robitaille J, Desroches S, Vohl M-C. Current knowledge and interest of French Canadians regarding nutrigenetics. *Genes Nutr*. 2019 Dec;14(1):5.
8. Caulfield T, McGuire AL. Direct-to-Consumer Genetic Testing: Perceptions, Problems, and Policy Responses. *Annu Rev Med*. 2012;63(1):23–33.
9. Horne J, Gilliland J, Madill J, Shelley J. A critical examination of legal and ethical considerations for nutrigenetic testing with recommendations for improving regulation in Canada: From science to consumer. *J Law Biosci*. 2020;
10. Görman U, Mathers JC, Grimaldi KA, Ahlgren J, Nordström K. Do we know enough? A scientific and ethical analysis of the basis for genetic-based personalized nutrition. *Genes Nutr*. 2013 Jul;8(4):373–81.
11. Harris WS. Stearidonic acid as a “pro-eicosapentaenoic acid.” *Curr Opin Lipidol*. 2012 Feb;23(1):30–4.
12. Shahidi F, Ambigaipalan P. Omega-3 Polyunsaturated Fatty Acids and Their Health Benefits. *Annu Rev Food Sci Technol*. 2018 25;9:345–81.

13. Hu Y, Hu FB, Manson JE. Marine Omega-3 Supplementation and Cardiovascular Disease: An Updated Meta-Analysis of 13 Randomized Controlled Trials Involving 127 477 Participants. *J Am Heart Assoc.* 2019;8(19):e013543.
14. Abdelhamid AS, Brown TJ, Brainard JS, Biswas P, Thorpe GC, Moore HJ, et al. Omega-3 fatty acids for the primary and secondary prevention of cardiovascular disease. *Cochrane Database Syst Rev* [Internet]. 2018 Jul 18 [cited 2020 Dec 1];2018(7). Available from: <https://www.ncbi.nlm.nih.gov/pmc/articles/PMC6513557/>
15. Jones PJH, Senanayake VK, Pu S, Jenkins DJA, Connelly PW, Lamarche B, et al. DHA-enriched high-oleic acid canola oil improves lipid profile and lowers predicted cardiovascular disease risk in the canola oil multicenter randomized controlled trial. *Am J Clin Nutr.* 2014 Jul;100(1):88–97.
16. Ballantyne CM, Bays HE, Kastelein JJ, Stein E, Isaacsohn JL, Braeckman RA, et al. Efficacy and Safety of Eicosapentaenoic Acid Ethyl Ester (AMR101) Therapy in Statin-Treated Patients With Persistent High Triglycerides (from the ANCHOR Study). *Am J Cardiol.* 2012 Oct 1;110(7):984–92.
17. Davidson MH, Stein EA, Bays HE, Maki KC, Doyle RT, Shalwitz RA, et al. Efficacy and tolerability of adding prescription omega-3 fatty acids 4 g/d to simvastatin 40 mg/d in hypertriglyceridemic patients: an 8-week, randomized, double-blind, placebo-controlled study. *Clin Ther.* 2007 Jul;29(7):1354–67.
18. Bradberry JC, Hilleman DE. Overview of Omega-3 Fatty Acid Therapies. *Pharm Ther.* 2013 Nov;38(11):681–91.
19. Skulas-Ray AC, Alaupovic P, Kris-Etherton PM, West SG. Dose-response effects of marine omega-3 fatty acids on apolipoproteins, apolipoprotein-defined lipoprotein subclasses, and Lp-PLA2 in individuals with moderate hypertriglyceridemia. *J Clin Lipidol.* 2015 Jun;9(3):360–7.
20. Lee MW, Park JK, Hong JW, Kim KJ, Shin DY, Ahn CW, et al. Beneficial Effects of Omega-3 Fatty Acids on Low Density Lipoprotein Particle Size in Patients with Type 2 Diabetes Already under Statin Therapy. *Diabetes Metab J.* 2013 Jun;37(3):207–11.
21. Bouwens M, van de Rest O, Dellschaft N, Bromhaar MG, de Groot LCPGM, Geleijnse JM, et al. Fish-oil supplementation induces antiinflammatory gene expression profiles in human blood mononuclear cells. *Am J Clin Nutr.* 2009 Aug;90(2):415–24.
22. Rudkowska I, Paradis A-M, Thifault E, Julien P, Tchernof A, Couture P, et al. Transcriptomic and metabolomic signatures of an n-3 polyunsaturated fatty acids supplementation in a normolipidemic/normocholesterolemic Caucasian population. *J Nutr Biochem.* 2013 Jan;24(1):54–61.
23. Merched AJ, Chan L. Nutrigenetics and Nutrigenomics of Atherosclerosis. *Curr Atheroscler Rep.* 2013 Jun;15(6):328.
24. Madden J, Williams CM, Calder PC, Lietz G, Miles EA, Cordell H, et al. The impact of common gene variants on the response of biomarkers of cardiovascular disease (CVD) risk to increased fish oil fatty acids intakes. *Annu Rev Nutr.* 2011 Aug 21;31:203–34.

- 1  
2  
3  
4  
5  
6  
7  
8  
9  
10  
11  
12  
13  
14  
15  
16  
17  
18  
19  
20  
21  
22  
23  
24  
25  
26  
27  
28  
29  
30  
31  
32  
33  
34  
35  
36  
37  
38  
39  
40  
41  
42  
43  
44  
45  
46  
47  
48  
49  
50  
51  
52  
53  
54  
55  
56  
57  
58  
59  
60
25. Cave C, Hein N, Smith LM, Anderson-Berry A, Richter CK, Bisselou KS, et al. Omega-3 Long-Chain Polyunsaturated Fatty Acids Intake by Ethnicity, Income, and Education Level in the United States: NHANES 2003–2014. *Nutrients* [Internet]. 2020 Jul 9 [cited 2020 Oct 27];12(7). Available from: <https://www.ncbi.nlm.nih.gov/pmc/articles/PMC7400855/>
  26. World Health Organization. Joint FAO/WHO Expert Consultation on Fats and Fatty Acids in Human Nutrition [Internet]. 2008. Available from: [http://www.who.int/nutrition/topics/FFA\\_interim\\_recommendations/en/](http://www.who.int/nutrition/topics/FFA_interim_recommendations/en/)
  27. Fats and Fatty Acids in Human Nutrition | Karger Book [Internet]. [cited 2021 Jan 14]. Available from: <https://www.karger.com/Book/Home/251867>
  28. Horne J, Madill J, O'Connor C, Shelley J, Gilliland J. A Systematic Review of Genetic Testing and Lifestyle Behaviour Change: Are We Using High-Quality Genetic Interventions and Considering Behaviour Change Theory? *Lifestyle Genomics*. 2018;11(1):49–63.
  29. Corella D, Ordovás JM. Interactions between dietary *n*-3 fatty acids and genetic variants and risk of disease. *Br J Nutr*. 2012 Jun;107(S2):S271–83.
  30. Grimaldi KA, van Ommen B, Ordovas JM, Parnell LD, Mathers JC, Bendik I, et al. Proposed guidelines to evaluate scientific validity and evidence for genotype-based dietary advice. *Genes Nutr*. 2017 Dec;12(1):35.
  31. Khan KS, Kunz R, Kleijnen J, Antes G. Five steps to conducting a systematic review. *J R Soc Med*. 2003 Mar;96(3):118–21.
  32. PRISMA. PRISMA: Transparent reporting of systematic reviews and meta-analyses [Internet]. 2015. Available from: <http://www.prisma-statement.org/>
  33. Pollock A, Berge E. How to do a systematic review. *Int J Stroke*. 2018 Feb 1;13(2):138–56.
  34. Dekkers OM, Vandenbroucke JP, Cevallos M, Renahan AG, Altman DG, Egger M. COSMOS-E: Guidance on conducting systematic reviews and meta-analyses of observational studies of etiology. *PLoS Med* [Internet]. 2019 Feb 21 [cited 2020 Apr 9];16(2). Available from: <https://www.ncbi.nlm.nih.gov/pmc/articles/PMC6383865/>
  35. Corella D, Ordovás JM. Interactions between dietary *n*-3 fatty acids and genetic variants and risk of disease. *Br J Nutr*. 2012 Jun;107(0 2):S271–83.
  36. GRADE handbook [Internet]. [cited 2020 Sep 29]. Available from: <https://gdt.gradepro.org/app/handbook/handbook.html>
  37. SNIIPA - a single nucleotide polymorphisms annotator and browser [Internet]. [cited 2020 Aug 20]. Available from: [https://snipa.helmholtz-muenchen.de/snipa3/index.php?task=proxy\\_search](https://snipa.helmholtz-muenchen.de/snipa3/index.php?task=proxy_search)

- 1  
2  
3  
4  
5  
6  
7  
8  
9  
10  
11  
12  
13  
14  
15  
16  
17  
18  
19  
20  
21  
22  
23  
24  
25  
26  
27  
28  
29  
30  
31  
32  
33  
34  
35  
36  
37  
38  
39  
40  
41  
42  
43  
44  
45  
46  
47  
48  
49  
50  
51  
52  
53  
54  
55  
56  
57  
58  
59  
60
38. Hosseini-Esfahani F, Mirmiran P, Koochakpoor G, Daneshpour MS, Guity K, Azizi F. Some dietary factors can modulate the effect of the zinc transporters 8 polymorphism on the risk of metabolic syndrome. *Sci Rep*. 2017 Dec;7(1):1649.
39. GRADE handbook [Internet]. [cited 2020 Apr 3]. Available from: <https://gdt.gradepro.org/app/handbook/handbook.html#h.dce0ghnajwsm>
40. Murad MH, Mustafa RA, Schünemann HJ, Sultan S, Santesso N. Rating the certainty in evidence in the absence of a single estimate of effect. *Evid Based Med*. 2017 Jun;22(3):85–7.
41. Ma L-L, Wang Y-Y, Yang Z-H, Huang D, Weng H, Zeng X-T. Methodological quality (risk of bias) assessment tools for primary and secondary medical studies: what are they and which is better? *Mil Med Res* [Internet]. 2020 Feb 29 [cited 2020 Sep 2];7. Available from: <https://www.ncbi.nlm.nih.gov/pmc/articles/PMC7049186/>
42. Chen Y, Estampador AC, Keller M, Poveda A, Dalla-Riva J, Johansson I, et al. The combined effects of FADS gene variation and dietary fats in obesity-related traits in a population from the far north of Sweden: the GLACIER Study. *Int J Obes*. 2019 Apr;43(4):808–20.
43. Ching YK, Chin YS, Appukutty M, Ramanchadran V, Yu CY, Ang GY, et al. Interaction of Dietary Linoleic Acid and  $\alpha$ -Linolenic Acids with rs174547 in FADS1 Gene on Metabolic Syndrome Components among Vegetarians. *Nutrients*. 2019 Jul 23;11(7):1686.
44. Dumont J, Huybrechts I, Spinneker A, Gottrand F, Grammatikaki E, Bevilacqua N, et al. FADS1 genetic variability interacts with dietary  $\alpha$ -linolenic acid intake to affect serum non-HDL-cholesterol concentrations in European adolescents. *J Nutr*. 2011 Jul;141(7):1247–53.
45. Dumont J, Goumidi L, Grenier-Boley B, Cottel D, Marécaux N, Montaye M, et al. Dietary linoleic acid interacts with FADS1 genetic variability to modulate HDL-cholesterol and obesity-related traits. *Clin Nutr*. 2018 Oct 1;37(5):1683–9.
46. Hellstrand S, Sonestedt E, Ericson U, Gullberg B, Wirfält E, Hedblad B, et al. Intake levels of dietary long-chain PUFAs modify the association between genetic variation in FADS and LDL-C. *J Lipid Res*. 2012 Jun;53(6):1183–9.
47. Lu Y, Feskens EJ, Dollé ME, Imholz S, Verschuren WM, Müller M, et al. Dietary n–3 and n–6 polyunsaturated fatty acid intake interacts with FADS1 genetic variation to affect total and HDL-cholesterol concentrations in the Doetinchem Cohort Study. *Am J Clin Nutr*. 2010 Jul 1;92(1):258–65.
48. Standl M, Lattka E, Stach B, Koletzko S, Bauer C-P, von Berg A, et al. FADS1 FADS2 Gene Cluster, PUFA Intake and Blood Lipids in Children: Results from the GINIplus and LISAPLUS Studies. *PLoS ONE* [Internet]. 2012 May 21 [cited 2020 Aug 3];7(5). Available from: <https://www.ncbi.nlm.nih.gov/pmc/articles/PMC3357401/>
49. Fontaine-Bisson B, Wolever TMS, Chiasson J-L, Rabasa-Lhoret R, Maheux P, Josse RG, et al. Genetic polymorphisms of tumor necrosis factor- $\alpha$  modify the association

1  
2  
3 between dietary polyunsaturated fatty acids and fasting HDL-cholesterol and apo A-I  
4 concentrations. *Am J Clin Nutr.* 2007 Sep;86(3):768–74.  
5

- 6  
7 50. Joffe YT, van der Merwe L, Carstens M, Collins M, Jennings C, Levitt NS, et al. Tumor  
8 Necrosis Factor- $\alpha$  Gene -308 G/A Polymorphism Modulates the Relationship between  
9 Dietary Fat Intake, Serum Lipids, and Obesity Risk in Black South African Women. *J*  
10 *Nutr.* 2010 May 1;140(5):901–7.  
11  
12 51. Joffe YT, van der Merwe L, Evans J, Collins M, Lambert EV, September A, et al. The tumor  
13 necrosis factor- $\alpha$  gene -238 G>A polymorphism, dietary fat intake, obesity risk and  
14 serum lipid concentrations in black and white South African women. *Eur J Clin Nutr.*  
15 2012 Dec;66(12):1295–302.  
16  
17 52. Tai ES, Corella D, Demissie S, Cupples LA, Coltell O, Schaefer EJ, et al. Polyunsaturated  
18 Fatty Acids Interact with the PPARA-L162V Polymorphism to Affect Plasma  
19 Triglyceride and Apolipoprotein C-III Concentrations in the Framingham Heart Study. *J*  
20 *Nutr.* 2005 Mar 1;135(3):397–403.  
21  
22 53. Volcik KA, Nettleton JA, Ballantyne CM, Boerwinkle E. Peroxisome proliferator-activated  
23 receptor [alpha] genetic variation interacts with n-6 and long-chain n-3 fatty acid intake  
24 to affect total cholesterol and LDL-cholesterol concentrations in the Atherosclerosis  
25 Risk in Communities Study. *Am J Clin Nutr.* 2008 Jun;87(6):1926–31.  
26  
27 54. Bouchard-Mercier A, Godin G, Lamarché B, Pérusse L, Vohl M-C. Effects of Peroxisome  
28 Proliferator-Activated Receptors, Dietary Fat Intakes and Gene–Diet Interactions on  
29 Peak Particle Diameters of Low-Density Lipoproteins. *J Nutr Nutr.* 2011;4(1):36–48.  
30  
31 55. Fallaize R, Celis-Morales C, Macready AL, Marsaux CF, Forster H, O'Donovan C, et al. The  
32 effect of the apolipoprotein E genotype on response to personalized dietary advice  
33 intervention: findings from the Food4Me randomized controlled trial. *Am J Clin Nutr.*  
34 2016 Sep;104(3):827–36.  
35  
36 56. Fontaine-Bisson B, Wolever TMS, Connelly PW, Corey PN, El-Sohemy A. NF- $\kappa$ B  
37 -94Ins/Del ATTG polymorphism modifies the association between dietary  
38 polyunsaturated fatty acids and HDL-cholesterol in two distinct populations.  
39 *Atherosclerosis.* 2009 Jun;204(2):465–70.  
40  
41 57. Jang HB, Hwang J-Y, Park JE, Oh JH, Ahn Y, Kang J-H, et al. Intake levels of dietary  
42 polyunsaturated fatty acids modify the association between the genetic variation in  
43 *PCSK5* and HDL cholesterol. *J Med Genet.* 2014 Dec;51(12):782–8.  
44  
45 58. Lai C-Q, Corella D, Demissie S, Cupples LA, Adiconis X, Zhu Y, et al. Dietary Intake of n-6  
46 Fatty Acids Modulates Effect of Apolipoprotein A5 Gene on Plasma Fasting  
47 Triglycerides, Remnant Lipoprotein Concentrations, and Lipoprotein Particle Size: The  
48 Framingham Heart Study. *Circulation.* 2006 May 2;113(17):2062–70.  
49  
50 59. Richardson K, Louie-Gao Q, Arnett DK, Parnell LD, Lai C-Q, Davalos A, et al. The *PLIN4*  
51 Variant rs8887 Modulates Obesity Related Phenotypes in Humans through Creation of a  
52 Novel miR-522 Seed Site. Mailund T, editor. *PLoS ONE.* 2011 Apr 20;6(4):e17944.  
53  
54  
55  
56  
57  
58  
59

- 1  
2  
3  
4  
5  
6  
7  
8  
9  
10  
11  
12  
13  
14  
15  
16  
17  
18  
19  
20  
21  
22  
23  
24  
25  
26  
27  
28  
29  
30  
31  
32  
33  
34  
35  
36  
37  
38  
39  
40  
41  
42  
43  
44  
45  
46  
47  
48  
49  
50  
51  
52  
53  
54  
55  
56  
57  
58  
59  
60
60. Warodomwicht D, Arnett DK, Kabagambe EK, Tsai MY, Hixson JE, Straka RJ, et al. Polyunsaturated Fatty Acids Modulate the Effect of TCF7L2 Gene Variants on Postprandial Lipemia. *J Nutr.* 2009 Mar 1;139(3):439–46.
  61. AlSaleh A, Maniou Z, Lewis FJ, Hall WL, Sanders TAB, O'Dell SD. Genetic predisposition scores for dyslipidaemia influence plasma lipid concentrations at baseline, but not the changes after controlled intake of n-3 polyunsaturated fatty acids. *Genes Nutr.* 2014 Jul;9(4):412.
  62. Harsløf LBS, Damsgaard CT, Hellgren LI, Andersen AD, Vogel U, Lauritzen L. Effects on metabolic markers are modified by PPARG2 and COX2 polymorphisms in infants randomized to fish oil. *Genes Nutr.* 2014 May;9(3):396.
  63. Rudkowska I, Guénard F, Julien P, Couture P, Lemieux S, Barbier O, et al. Genome-wide association study of the plasma triglyceride response to an n-3 polyunsaturated fatty acid supplementation. *J Lipid Res.* 2014 Jul;55(7):1245–53.
  64. Vallée Marcotte B, Guénard F, Cormier H, Lemieux S, Couture P, Rudkowska I, et al. Plasma Triglyceride Levels May Be Modulated by Gene Expression of IQCJ, NXP1, PHF17 and MYB in Humans. *Int J Mol Sci.* 2017 Jan 26;18(2).
  65. Vallée Marcotte B, Guénard F, Lemieux S, Couture P, Rudkowska I, Calder PC, et al. Fine mapping of genome-wide association study signals to identify genetic markers of the plasma triglyceride response to an omega-3 fatty acid supplementation. *Am J Clin Nutr.* 2019 Jan 1;109(1):176–85.
  66. Vallée Marcotte B, Allaire J, Guénard F, de Toro-Martín J, Couture P, Lamarche B, et al. Genetic risk prediction of the plasma triglyceride response to independent supplementations with eicosapentaenoic and docosahexaenoic acids: the COMPARED Study. *Genes Nutr.* 2020 Dec;15(1):10.
  67. Zheng J-S, Chen J, Wang L, Yang H, Fang L, Yu Y, et al. Replication of a Gene-Diet Interaction at CD36, NOS3 and PPARG in Response to Omega-3 Fatty Acid Supplements on Blood Lipids: A Double-Blind Randomized Controlled Trial. *EBioMedicine.* 2018 May;31:150–6.
  68. Vallée Marcotte B, Guénard F, Marquis J, Charpagne A, Vadillo-Ortega F, Tejero M, et al. Genetic Risk Score Predictive of the Plasma Triglyceride Response to an Omega-3 Fatty Acid Supplementation in a Mexican Population. *Nutrients.* 2019 Mar 29;11(4):737.
  69. Roke K, Mutch DM. The Role of FADS1/2 Polymorphisms on Cardiometabolic Markers and Fatty Acid Profiles in Young Adults Consuming Fish Oil Supplements. *Nutrients.* 2014 Jun 16;6(6):2290–304.
  70. Cormier H, Rudkowska I, Paradis A-M, Thifault E, Garneau V, Lemieux S, et al. Association between Polymorphisms in the Fatty Acid Desaturase Gene Cluster and the Plasma Triacylglycerol Response to an n-3 PUFA Supplementation. *Nutrients.* 2012 Aug 17;4(8):1026–41.



- 1  
2  
3  
4  
5  
6  
7  
8  
9  
10  
11  
12  
13  
14  
15  
16  
17  
18  
19  
20  
21  
22  
23  
24  
25  
26  
27  
28  
29  
30  
31  
32  
33  
34  
35  
36  
37  
38  
39  
40  
41  
42  
43  
44  
45  
46  
47  
48  
49  
50  
51  
52  
53  
54  
55  
56  
57  
58  
59  
60
71. AbuMweis SS, Panchal SK, Jones PJH. Triacylglycerol-Lowering Effect of Docosahexaenoic Acid Is Not Influenced by Single-Nucleotide Polymorphisms Involved in Lipid Metabolism in Humans. *Lipids*. 2018;53(9):897–908.
  72. Carvalho-Wells AL, Jackson KG, Lockyer S, Lovegrove JA, Minihane AM. APOE genotype influences triglyceride and C-reactive protein responses to altered dietary fat intake in UK adults. *Am J Clin Nutr*. 2012 Dec 1;96(6):1447–53.
  73. Caslake MJ, Miles EA, Kofler BM, Lietz G, Curtis P, Armah CK, et al. Effect of sex and genotype on cardiovascular biomarker response to fish oils: the FINGEN Study. *Am J Clin Nutr*. 2008 Sep 1;88(3):618–29.
  74. Dang TM, Conway V, Plourde M. Disrupted fatty acid distribution in HDL and LDL according to apolipoprotein E allele. *Nutrition*. 2015 Jun 1;31(6):807–12.
  75. Jackson KG, Lockyer S, Carvalho-Wells AL, Williams CM, Minihane AM, Lovegrove JA. Dietary fat manipulation has a greater impact on postprandial lipid metabolism than the apolipoprotein E (epsilon) genotype—insights from the SATgene study. *Mol Nutr Food Res*. 2012;56(12):1761–70.
  76. Jackson KG, Lockyer S, Carvalho-Wells AL, Williams CM, Minihane AM, Lovegrove JA. *Apolipoprotein E (epsilon) genotype has a greater impact on apoB-48 than apoB-100 responses to dietary fat manipulation—insights from the SATgene study*. *Mol Nutr Food Res*. 2017 Apr;61(4):1600688.
  77. Minihane AM, Khan S, Leigh-Firbank EC, Talmud P, Wright JW, Murphy MC, et al. ApoE Polymorphism and Fish Oil Supplementation in Subjects With an Atherogenic Lipoprotein Phenotype. *Arterioscler Thromb Vasc Biol*. 2000 Aug;20(8):1990–7.
  78. Olano-Martin E, Anil E, Caslake MJ, Packard CJ, Bedford D, Stewart G, et al. Contribution of apolipoprotein E genotype and docosahexaenoic acid to the LDL-cholesterol response to fish oil. *Atherosclerosis*. 2010 Mar;209(1):104–10.
  79. Paschos GK, Yiannakouris N, Rallidis LS, Davies I, Griffin BA, Panagiotakos DB, et al. Apolipoprotein E Genotype in Dyslipidemic Patients and Response of Blood Lipids and Inflammatory Markers to Alpha-Linolenic Acid. *Angiology*. 2005 Jan 1;56(1):49–60.
  80. Thifault E, Cormier H, Bouchard-Mercier A, Rudkowska I, Paradis A-M, Garneau V, et al. Effects of Age, Sex, Body Mass Index and APOE Genotype on Cardiovascular Biomarker Response to an n-3 Polyunsaturated Fatty Acid Supplementation. *J Nutr Nutr*. 2013;6(2):73–82.
  81. Madden J, Carrero J, Brunner A, Dastur N, Shearman C, Calder P, et al. Polymorphisms in the CD36 gene modulate the ability of fish oil supplements to lower fasting plasma triacyl glycerol and raise HDL cholesterol concentrations in healthy middle-aged men. *Prostaglandins, Leukotrienes and Essential Fatty Acids*. 2008;78:327–35.
  82. Dawczynski C, Massey KA, Ness C, Kiehntopf M, Stepanow S, Platzer M, et al. Randomized placebo-controlled intervention with n-3 LC-PUFA-supplemented yoghurt: Effects on circulating eicosanoids and cardiovascular risk factors. *Clin Nutr*. 2013 Oct 1;32(5):686–96.

- 1  
2  
3  
4  
5  
6  
7  
8  
9  
10  
11  
12  
13  
14  
15  
16  
17  
18  
19  
20  
21  
22  
23  
24  
25  
26  
27  
28  
29  
30  
31  
32  
33  
34  
35  
36  
37  
38  
39  
40  
41  
42  
43  
44  
45  
46  
47  
48  
49  
50  
51  
52  
53  
54  
55  
56  
57  
58  
59  
60
83. Binia A, Vargas-Martínez C, Ancira-Moreno M, Gosoniu LM, Montoliu I, Gámez-Valdez E, et al. Improvement of cardiometabolic markers after fish oil intervention in young Mexican adults and the role of PPAR $\alpha$  L162V and PPAR $\gamma$ 2 P12A. *J Nutr Biochem*. 2017 May;43:98–106.
  84. Itariu BK, Zeyda M, Hochbrugger EE, Neuhofer A, Prager G, Schindler K, et al. Long-chain n–3 PUFAs reduce adipose tissue and systemic inflammation in severely obese nondiabetic patients: a randomized controlled trial. *Am J Clin Nutr*. 2012 Nov 1;96(5):1137–49.
  85. Lindi V, Schwab U, Louheranta A, Laakso M, Vessby B, Hermansen K, et al. Impact of the Pro12Ala polymorphism of the PPAR- $\gamma$ 2 gene on serum triacylglycerol response to n–3 fatty acid supplementation. *Mol Genet Metab*. 2003 May;79(1):52–60.
  86. Pishva H, Mehdipour P, Eshraghian MR, Mahboob S-A. Effects of Eicosapentaenoic Acid Supplementation on Lipid and Lipoprotein Profile in Hypertriglyceridemic Subjects with Different Proliferator-activated Receptor Alpha Genotypes. :13.
  87. Caron-Dorval D, Paquet P, Paradis A-M, Rudkowska I, Lemieux S, Couture P, et al. Effect of the PPAR-Alpha L162V Polymorphism on the Cardiovascular Disease Risk Factor in Response to n–3 Polyunsaturated Fatty Acids. *J Nutr Nutr*. 2008;1(4):205–12.
  88. Binia A, Vargas-Martínez C, Ancira-Moreno M, Gosoniu LM, Montoliu I, Gámez-Valdez E, et al. Improvement of cardiometabolic markers after fish oil intervention in young Mexican adults and the role of PPAR $\alpha$  L162V and PPAR $\gamma$ 2 P12A. *J Nutr Biochem*. 2017 May;43:98–106.
  89. Dawczynski C, Massey KA, Ness C, Kiehntopf M, Stepanow S, Platzer M, et al. Randomized placebo-controlled intervention with n-3 LC-PUFA-supplemented yoghurt: Effects on circulating eicosanoids and cardiovascular risk factors. *Clin Nutr*. 2013 Oct;32(5):686–96.
  90. Kotze M, Brand T, Pretorius J, J van Rensburg S, Luckhoff HK. Apolipoprotein E epsilon-4 as a genetic determinant of Alzheimer’s disease heterogeneity. *Degener Neurol Neuromuscul Dis*. 2015 Jan;9.
  91. Marais AD. Apolipoprotein E in lipoprotein metabolism, health and cardiovascular disease. *Pathology (Phila)*. 2019 Feb;51(2):165–76.
  92. Kuo C-L, Pilling LC, Atkins JL, Kuchel GA, Melzer D. ApoE e2 and aging-related outcomes in 379,000 UK Biobank participants. *Aging*. 2020 Jun 8;12(12):12222–33.
  93. Nawawi HM, Chua Y-A, Watts GF. The brave new world of genetic testing in the management of the dyslipidaemias. *Curr Opin Cardiol*. 2020;35(3):226–33.
  94. Livingston G, Huntley J, Sommerlad A, Ames D, Ballard C, Banerjee S, et al. Dementia prevention, intervention, and care: 2020 report of the Lancet Commission. *The Lancet*. 2020 Aug;396(10248):413–46.
  95. Dorszewska J, Prendecki M, Oczkowska A, Dezor M, Kozubski W. Molecular Basis of Familial and Sporadic Alzheimer’s Disease. *Curr Alzheimer Res*. 2016;13(9):952–63.

- 1  
2  
3  
4  
5  
6  
7  
8  
9  
10  
11  
12  
13  
14  
15  
16  
17  
18  
19  
20  
21  
22  
23  
24  
25  
26  
27  
28  
29  
30  
31  
32  
33  
34  
35  
36  
37  
38  
39  
40  
41  
42  
43  
44  
45  
46  
47  
48  
49  
50  
51  
52  
53  
54  
55  
56  
57  
58  
59  
60
96. ACCE Model Process for Evaluating Genetic Tests | CDC [Internet]. 2021 [cited 2021 Feb 15]. Available from: <https://www.cdc.gov/genomics/gtesting/acce/index.htm>
  97. Corella D, Coltell O, Portolés O, Sotos-Prieto M, Fernández-Carrión R, Ramirez-Sabio J, et al. A Guide to Applying the Sex-Gender Perspective to Nutritional Genomics. *Nutrients*. 2018 Dec 20;11(1):4.
  98. Dellinger RW, Gomez Garcia AM, Meyskens FL. Differences in the Glucuronidation of Resveratrol and Pterostilbene: Altered Enzyme Specificity and Potential Gender Differences. *Drug Metab Pharmacokinet*. 2014;29(2):112–9.
  99. Vidaver RM, Lafleur B, Tong C, Bradshaw R, Marts SA. Women Subjects in NIH-Funded Clinical Research Literature: Lack of Progress in Both Representation and Analysis by Sex. *J Womens Health Gend Based Med*. 2000 Jun 1;9(5):495–504.
  100. Carvalho-Wells AL, Jackson KG, Lockyer S, Lovegrove JA, Minihane AM. APOE genotype influences triglyceride and C-reactive protein responses to altered dietary fat intake in UK adults. *Am J Clin Nutr*. 2012 Dec 1;96(6):1447–53.
  101. Thifault E, Cormier H, Bouchard-Mercier A, Rudkowska I, Paradis A-M, Garneau V, et al. Effects of Age, Sex, Body Mass Index and APOE Genotype on Cardiovascular Biomarker Response to an n-3 Polyunsaturated Fatty Acid Supplementation. *Lifestyle Genomics*. 2013;6(2):73–82.
  102. Minihane Anne M., Khan Syrah, Leigh-Firbank Elizabeth C., Talmud Philippa, Wright John W., Murphy Margaret C., et al. ApoE Polymorphism and Fish Oil Supplementation in Subjects With an Atherogenic Lipoprotein Phenotype. *Arterioscler Thromb Vasc Biol*. 2000 Aug 1;20(8):1990–7.
  103. Little J, Higgins J, Ioannidis J, Moher D, Gagnon F, von Elm E, et al., editors. STrengthening the REporting of Genetic Association studies (STREGA) - An extension of the STROBE statement. *PLoS Med*. 2009;6(2):e1000022.
  104. Strande NT. Evaluating the Clinical Validity of Gene-Disease Associations: An Evidence-Based Framework Developed by the Clinical Genome Resource. *The American Journal of Human Genetics*. 2017;12.
  105. Ciesielski TH, Pendergrass SA, White MJ, Kodaman N, Sobota RS, Huang M, et al. Diverse convergent evidence in the genetic analysis of complex disease: coordinating omic, informatic, and experimental evidence to better identify and validate risk factors. *BioData Min*. 2014 Dec;7(1):10.
  106. Rudkowska I, Paradis A-M, Thifault E, Julien P, Barbier O, Couture P, et al. Differences in metabolomic and transcriptomic profiles between responders and non-responders to an n-3 polyunsaturated fatty acids (PUFAs) supplementation. *Genes Nutr*. 2013 Jul;8(4):411–23.
  107. Tremblay BL, Cormier H, Rudkowska I, Lemieux S, Couture P, Vohl M-C. Association between polymorphisms in phospholipase A2 genes and the plasma triglyceride response to an n-3 PUFA supplementation: a clinical trial. *Lipids Health Dis*. 2015 Feb 21;14(1):12.

- 1  
2  
3 108. Ouellette C, Cormier H, Rudkowska I, Guénard F, Lemieux S, Couture P, et al.  
4 Polymorphisms in Genes Involved in the Triglyceride Synthesis Pathway and Marine  
5 Omega-3 Polyunsaturated Fatty Acid Supplementation Modulate Plasma Triglyceride  
6 Levels. *Lifestyle Genomics*. 2013;6(4-5):268-80.  
7
- 8 109. Ray-Barruel G, Rickard CM. Helping nurses help PIVCs: decision aids for daily  
9 assessment and maintenance. *Br J Nurs Mark Allen Publ*. 2018 Apr 26;27(8):S12-8.  
10  
11  
12  
13  
14  
15  
16  
17  
18  
19  
20  
21  
22  
23  
24  
25  
26  
27  
28  
29  
30  
31  
32  
33  
34  
35  
36  
37  
38  
39  
40  
41  
42  
43  
44  
45  
46  
47  
48  
49  
50  
51  
52  
53  
54  
55  
56  
57  
58  
59  
60

1  
2  
3  
4  
5  
6  
7  
8  
9  
10  
11  
12  
13  
14  
15  
16  
17  
18  
19  
20  
21  
22  
23  
24  
25  
26  
27  
28  
29  
30  
31  
32  
33  
34  
35  
36  
37  
38  
39  
40  
41  
42  
43  
44  
45  
46  
47

For peer review only



**Figure 1: PRISMA 2009 Flow Diagram**



1  
2  
3  
4  
5  
6  
7  
8  
9  
10  
11  
12  
13  
14  
15  
16  
17  
18  
19  
20  
21  
22  
23  
24  
25  
26  
27  
28  
29  
30  
31  
32  
33  
34  
35  
36  
37  
38  
39  
40  
41  
42  
43  
44  
45  
46  
47  
48  
49  
50  
51  
52  
53  
54  
55  
56  
57  
58  
59  
60

For peer review only

1  
2  
3  
4  
5  
6  
7  
8  
9  
10  
11  
12  
13  
14  
15  
16  
17  
18  
19  
20  
21  
22  
23  
24  
25  
26  
27  
28  
29  
30  
31  
32  
33  
34  
35  
36  
37  
38  
39  
40  
41  
42  
43  
44  
45  
46  
47

**Supplementary Tables**

***Supplementary Table 1: Search Strategy***

| <b>Embase</b> |                                                                                                                                                                                                                                                                                                                                                                                                                                                                                   |
|---------------|-----------------------------------------------------------------------------------------------------------------------------------------------------------------------------------------------------------------------------------------------------------------------------------------------------------------------------------------------------------------------------------------------------------------------------------------------------------------------------------|
| <b>#</b>      | <b>Search Strategy</b>                                                                                                                                                                                                                                                                                                                                                                                                                                                            |
| 1             | omega-3':ti,ab,kw OR pufa\$:ti,ab,kw OR ((acid* NEAR/5 ('n-3' OR polyunsaturated OR linolenic OR eicosapenta\$noic OR timnodonic OR docosahexa\$noic)):ti,ab,kw) OR docosahexaenoate:ti,ab,kw OR epa:ti,ab,kw OR dha:ti,ab,kw OR ala:ti,ab,kw                                                                                                                                                                                                                                     |
| 2             | omega 3 fatty acid'/exp                                                                                                                                                                                                                                                                                                                                                                                                                                                           |
| 3             | <b>#1 OR #2</b>                                                                                                                                                                                                                                                                                                                                                                                                                                                                   |
| 4             | cholesterol*:ti,ab,kw OR hdl:ti,ab,kw OR ldl:ti,ab,kw OR 'high density lipoprotein*':ti,ab,kw OR 'low density lipoprotein*':ti,ab,kw OR 'beta lipoprotein*':ti,ab,kw OR apo*protein*:ti,ab,kw OR apoa:ti,ab,kw OR apob:ti,ab,kw OR apoc:ti,ab,kw OR apod:ti,ab,kw OR apoe:ti,ab,kw OR apoh:ti,ab,kw OR ((apo NEXT/1 (a OR b OR c OR d OR e OR h)):ti,ab,kw) OR triglyceride*:ti,ab,kw OR triacylglycerol*:ti,ab,kw OR (((serum OR plasma) NEXT/1 (lipid* OR tg OR tag)):ti,ab,kw) |
| 5             | cholesterol'/exp OR 'lipoprotein'/exp OR 'triacylglycerol'/exp                                                                                                                                                                                                                                                                                                                                                                                                                    |
| 6             | <b>#4 OR #5</b>                                                                                                                                                                                                                                                                                                                                                                                                                                                                   |
| 7             | nutrigenomic*:ti,ab,kw OR nutrigenetic*:ti,ab,kw OR (((nutritional OR expression* OR variation* OR variant*) NEAR/2 (genomic* OR genetic* OR gene OR genes)):ti,ab,kw) OR genotype:ti,ab,kw OR (((('nutrient-gene' OR 'gene-nutrient' OR 'gene-diet') NEXT/1 interaction*)):ti,ab,kw) OR 'personalized nutrition':ti,ab,kw OR 'precision nutrition':ti,ab,kw                                                                                                                      |
| 8             | nutrigenomics'/exp OR 'nutrigenetics'/exp OR 'genetic variation'/exp OR 'genotype'/exp                                                                                                                                                                                                                                                                                                                                                                                            |
| 9             | <b>#7 OR #8</b>                                                                                                                                                                                                                                                                                                                                                                                                                                                                   |
| 10            | <b>#3 AND #6 AND #9</b>                                                                                                                                                                                                                                                                                                                                                                                                                                                           |
| 11            | [animals]/lim NOT [humans]/lim                                                                                                                                                                                                                                                                                                                                                                                                                                                    |
| 12            | <b>#10 NOT #11</b>                                                                                                                                                                                                                                                                                                                                                                                                                                                                |



## Medline (Ovid)

| #  | Search Strategy                                                                                                                                                                                                                                                                                                            |
|----|----------------------------------------------------------------------------------------------------------------------------------------------------------------------------------------------------------------------------------------------------------------------------------------------------------------------------|
| 1  | ("omega-3" or PUFA? or (acid* adj5 ("n-3" or polyunsaturated or linolenic or eicosapenta?noic or timnodonic or docosahexa?noic)) or docosahexaenoate or EPA or DHA or ALA).ab,kf,ti.                                                                                                                                       |
| 2  | exp Fatty Acids, Omega-3/                                                                                                                                                                                                                                                                                                  |
| 3  | <b>1 or 2</b>                                                                                                                                                                                                                                                                                                              |
| 4  | (cholesterol* or HDL or LDL or "high density lipoprotein*" or "low density lipoprotein*" or "beta lipoprotein*" or apo*protein* or apoA or apoB or apoC or apoD or apoE or apoH or (apo adj (A or B or C or D or E or H)) or triglyceride* or triacylglycerol* or ((serum or plasma) adj (lipid* or TG or TAG))).ab,kf,ti. |
| 5  | exp Cholesterol/ or exp Lipoproteins/ or exp Triglycerides/                                                                                                                                                                                                                                                                |
| 6  | <b>4 or 5</b>                                                                                                                                                                                                                                                                                                              |
| 7  | (nutrigenomic* or nutrigenetic* or ((nutritional or expression* or variation* or variant*) adj2 (genomic* or genetic* or gene or genes)) or genotype or (("nutrient-gene" or "gene-nutrient" or "gene-diet") adj interaction*) or "personalized nutrition" or "precision nutrition").ab,kf,ti.                             |
| 8  | Nutrigenomics/ or Genetic Variation/ or Genotype/                                                                                                                                                                                                                                                                          |
| 9  | <b>7 or 8</b>                                                                                                                                                                                                                                                                                                              |
| 10 | <b>3 and 6 and 9</b>                                                                                                                                                                                                                                                                                                       |
| 11 | exp animals/ not humans.sh.                                                                                                                                                                                                                                                                                                |
| 12 | <b>10 not 11</b>                                                                                                                                                                                                                                                                                                           |

## Web of Science

*Indexes = SCI-EXPANDED, SSCI, A&HCI, CPCI-S, CPCI-SSH, ESCI Timespan =All years*

1  
2  
3  
4  
5  
6  
7  
8  
9  
10  
11  
12  
13  
14  
15  
16  
17  
18  
19  
20  
21  
22  
23  
24  
25  
26  
27  
28  
29  
30  
31  
32  
33  
34  
35  
36  
37  
38  
39  
40  
41  
42  
43  
44  
45  
46  
47

| # | Search Strategy                                                                                                                                                                                                                                                                                                                                                                                                                                                                                                                                                                                                                                                                                                                                                                                                                                                                                                                                                                                                                                                                                                                                                                                                                                                                                                                                                                                                                                                                                                                                                                                                                                                                                                                                                                                                                                                                                                                                                                                                                                                                                                                                                                                                                                                                                                                                                                                                                                                                                                                                                                                                                                                                                                                                                                                                                                                                                                                                                       |
|---|-----------------------------------------------------------------------------------------------------------------------------------------------------------------------------------------------------------------------------------------------------------------------------------------------------------------------------------------------------------------------------------------------------------------------------------------------------------------------------------------------------------------------------------------------------------------------------------------------------------------------------------------------------------------------------------------------------------------------------------------------------------------------------------------------------------------------------------------------------------------------------------------------------------------------------------------------------------------------------------------------------------------------------------------------------------------------------------------------------------------------------------------------------------------------------------------------------------------------------------------------------------------------------------------------------------------------------------------------------------------------------------------------------------------------------------------------------------------------------------------------------------------------------------------------------------------------------------------------------------------------------------------------------------------------------------------------------------------------------------------------------------------------------------------------------------------------------------------------------------------------------------------------------------------------------------------------------------------------------------------------------------------------------------------------------------------------------------------------------------------------------------------------------------------------------------------------------------------------------------------------------------------------------------------------------------------------------------------------------------------------------------------------------------------------------------------------------------------------------------------------------------------------------------------------------------------------------------------------------------------------------------------------------------------------------------------------------------------------------------------------------------------------------------------------------------------------------------------------------------------------------------------------------------------------------------------------------------------------|
| 1 | TS=("omega-3" or PUFA\$ or (acid* NEAR/5 ("n-3" or polyunsaturated or linolenic or eicosapenta\$noic or timnodonic or docosahexa\$noic)) or docosahexaenoate or EPA or DHA or ALA)                                                                                                                                                                                                                                                                                                                                                                                                                                                                                                                                                                                                                                                                                                                                                                                                                                                                                                                                                                                                                                                                                                                                                                                                                                                                                                                                                                                                                                                                                                                                                                                                                                                                                                                                                                                                                                                                                                                                                                                                                                                                                                                                                                                                                                                                                                                                                                                                                                                                                                                                                                                                                                                                                                                                                                                    |
| 2 | TS=(cholesterol* or HDL or LDL or "high density lipoprotein*" or "low density lipoprotein*" or "beta lipoprotein*" or apo*protein* or apoA or apoB or apoC or apoD or apoE or apoH or (apo NEAR/0 (A or B or C or D or E or H)) or triglyceride* or triacylglycerol* or ((serum or plasma) NEAR/0 (lipid* or TG or TAG)))                                                                                                                                                                                                                                                                                                                                                                                                                                                                                                                                                                                                                                                                                                                                                                                                                                                                                                                                                                                                                                                                                                                                                                                                                                                                                                                                                                                                                                                                                                                                                                                                                                                                                                                                                                                                                                                                                                                                                                                                                                                                                                                                                                                                                                                                                                                                                                                                                                                                                                                                                                                                                                             |
| 3 | TS=(nutrigenomic* or nutrigenetic* or ((nutritional or expression* or variation* or variant*) NEAR/2 (genomic* or genetic* or gene or genes)) or genotype or (("nutrient-gene" or "gene-nutrient" or "gene-diet") NEAR/0 interaction*) or "personalized nutrition" or "precision nutrition" )                                                                                                                                                                                                                                                                                                                                                                                                                                                                                                                                                                                                                                                                                                                                                                                                                                                                                                                                                                                                                                                                                                                                                                                                                                                                                                                                                                                                                                                                                                                                                                                                                                                                                                                                                                                                                                                                                                                                                                                                                                                                                                                                                                                                                                                                                                                                                                                                                                                                                                                                                                                                                                                                         |
| 4 | <b>#1 AND #2 AND #3</b>                                                                                                                                                                                                                                                                                                                                                                                                                                                                                                                                                                                                                                                                                                                                                                                                                                                                                                                                                                                                                                                                                                                                                                                                                                                                                                                                                                                                                                                                                                                                                                                                                                                                                                                                                                                                                                                                                                                                                                                                                                                                                                                                                                                                                                                                                                                                                                                                                                                                                                                                                                                                                                                                                                                                                                                                                                                                                                                                               |
| 5 | TS=(animals OR animal OR mice OR mus OR mouse OR murine OR woodmouse OR rats OR rat OR murinae OR muridae OR cottonrat OR cottonrats OR hamster OR hamsters OR cricetinae OR rodentia OR rodent OR rodents OR pigs OR pig OR swine OR swines OR piglets OR piglet OR boar OR boars OR "sus scrofa" OR ferrets OR ferret OR polecat OR polecats OR "mustela putorius" OR "guinea pigs" OR "guinea pig" OR cavia OR callithrix OR marmoset OR marmosets OR cebuella OR hapale OR octodon OR chinchilla OR chinchillas OR gerbillinae OR gerbil OR gerbils OR jird OR jirds OR merione OR meriones OR rabbits OR rabbit OR hares OR hare OR diptera OR flies OR fly OR dipteral OR drosophila OR drosophilidae OR cats OR cat OR carus OR felis OR nematoda OR nematode OR nematoda OR nematode OR nematodes OR sipunculida OR dogs OR dog OR canine OR canines OR canis OR sheep OR sheeps OR mouflon OR mouflons OR ovis OR goats OR goat OR capra OR capras OR rupicapra OR chamois OR haplorhini OR monkey OR monkeys OR anthropoidea OR anthropoids OR saguinus OR tamarin OR tamarins OR leontopithecus OR hominidae OR ape OR apes OR pan OR paniscus OR "pan paniscus" OR bonobo OR bonobos OR troglodytes OR "pan troglodytes" OR gibbon OR gibbons OR siamang OR siamangs OR nomascus OR symphalangus OR chimpanzee OR chimpanzees OR prosimians OR "bush baby" OR prosimian OR bush babies OR galagos OR galago OR pongidae OR gorilla OR gorillas OR pongo OR pygmaeus OR "pongo pygmaeus" OR orangutans OR pygmaeus OR lemur OR lemurs OR lemuridae OR horse OR horses OR pongo OR equus OR cow OR calf OR bull OR chicken OR chickens OR gallus OR quail OR bird OR birds OR quails OR poultry OR poultries OR fowl OR fowls OR reptile OR reptilia OR reptiles OR snakes OR snake OR lizard OR lizards OR alligator OR alligators OR crocodile OR crocodiles OR turtle OR turtles OR amphibian OR amphibians OR amphibia OR frog OR frogs OR bombina OR salientia OR toad OR toads OR "epidalea calamita" OR salamander OR salamanders OR eel OR eels OR sciuridae OR squirrel OR squirrels OR chipmunk OR chipmunks OR suslik OR susliks OR vole OR voles OR lemming OR lemmings OR muskrat OR muskrats OR lemmus OR otter OR otters OR marten OR martens OR martes OR weasel OR badger OR badgers OR ermine OR mink OR minks OR sable OR sables OR gulo OR gulos OR wolverine OR wolverines OR minks OR mustela OR llama OR llamas OR alpaca OR alpacas OR camelid OR camelids OR guanaco OR guanacos OR chiroptera OR chiropteras OR bat OR bats OR fox OR foxes OR iguana OR iguanas OR xenopus laevis OR parakeet OR parakeets OR parrot OR parrots OR donkey OR donkeys OR mule OR mules OR zebra OR zebras OR shrew OR shrews OR bison OR bisons OR buffalo OR buffaloes OR deer OR deers OR bear OR bears OR panda OR pandas OR "wild hog" OR "wild boar" OR fitchew OR fitch OR beaver OR beavers OR jerboa OR jerboas OR capybara OR capybaras) |
| 6 | <b>#4 not #5</b>                                                                                                                                                                                                                                                                                                                                                                                                                                                                                                                                                                                                                                                                                                                                                                                                                                                                                                                                                                                                                                                                                                                                                                                                                                                                                                                                                                                                                                                                                                                                                                                                                                                                                                                                                                                                                                                                                                                                                                                                                                                                                                                                                                                                                                                                                                                                                                                                                                                                                                                                                                                                                                                                                                                                                                                                                                                                                                                                                      |

Supplementary Table 2: Summary of observational studies

| Author, Year                     | Study Design                                         | Genetic Approach                       | Population (sample size included in analyses)                                        | Gene(s), SNP(s)                                                                                                                          | Cytogenic Location of Gene(s)                                              | Quantity, Source and Type of Omega-3 <sup>1</sup>                                                                  | Comparators                                                                                                                                                                                   | Plasma Lipid/Lipoprotein Outcome(s) | Summary of Statistically Significant Study Findings Relevant to the Research Question <sup>2</sup>                                                                                                                                                                                                                                                                                                                                                                                                                           |
|----------------------------------|------------------------------------------------------|----------------------------------------|--------------------------------------------------------------------------------------|------------------------------------------------------------------------------------------------------------------------------------------|----------------------------------------------------------------------------|--------------------------------------------------------------------------------------------------------------------|-----------------------------------------------------------------------------------------------------------------------------------------------------------------------------------------------|-------------------------------------|------------------------------------------------------------------------------------------------------------------------------------------------------------------------------------------------------------------------------------------------------------------------------------------------------------------------------------------------------------------------------------------------------------------------------------------------------------------------------------------------------------------------------|
| Bouchard-Mercier et al. 2011 (1) | Cross-Sectional                                      | Single SNP                             | Healthy Caucasian men and women from INFOGENE study (n=674)                          | <i>PPARα</i> , L162V (rs1800206)<br><i>PPARγ</i> , P12A (rs1801282)<br><i>PPARδ</i> , -87T→C (rs2016520)                                 | <i>PPARα</i> : 22q13.31<br><i>PPARγ</i> : 3p25.2<br><i>PPARδ</i> : 6p21.31 | Mean:<br>L162: 2.8 g/day<br>V162: 2.9 g/day<br>(unclear if food and/or supplement sources)                         | Minor allele carriers vs. Non-carriers                                                                                                                                                        | LDL-PPD                             | <b>LDL-PPD:</b> In a model including age, sex, TG, BMI, energy and omega-3 intakes and <i>PPARα</i> L162V (rs1800206) polymorphism, the interaction of <i>PPARα</i> 162V and omega-3 intakes explained 0.62% of the variance in LDL-PPD.                                                                                                                                                                                                                                                                                     |
| Bodhini et al. 2017 (2)          | Cross-Sectional                                      | Single SNP                             | Adults with normal glucose tolerance (n=821) and adults with type 2 diabetes (n=861) | <i>MC4R</i> , rs17782313<br><i>TCF7L2</i> , rs12255372<br><i>TCF7L2</i> , rs7903146                                                      | <i>MC4R</i> : 18q21.32<br><i>TCF7L2</i> : 10q25.2-q25.3                    | <b>Low:</b> 0.38 g/day ALA<br><b>Moderate:</b> 0.58 g/day ALA<br><b>High:</b> 0.89 g/day ALA (means) (food)        | Major allele homozygotes vs. Minor allele carriers                                                                                                                                            | HDL-c                               | <b>HDL-c:</b> 'T' allele carriers of <i>TCF7L2</i> rs12255372 within the lowest tertile of ALA intake (mean=0.38 g/day) exhibited higher levels of HDL-c compared to GG homozygotes in the lowest tertile of ALA intake (mean=0.38 g/day)                                                                                                                                                                                                                                                                                    |
| Chen et al. 2019 (3)             | Cross-Sectional Analysis within a Prospective Cohort | Single SNP, Haplotype and Gene-Centric | Adults of Swedish ancestry from the GLACIER cohort (n=5160)                          | All variations in the <i>FADS1-FADS2-FADS3</i> gene cluster and variation within 200kb upstream and downstream of the <i>FADS</i> region | <i>FADS1</i> : 11q12.2<br><i>FADS2</i> : 11q12.2<br><i>FADS3</i> : 11q12.2 | <b>High:</b> >1.6 g/day<br><b>Low:</b> <1.6 g/day (food)                                                           | Entire <i>FADS</i> region gene-centric analysis and Variation in individual <i>FADS</i> cluster SNPs: rs174570, rs174602, rs74771917, rs3168072, rs12577276, rs7115739 and Haplotype analysis | HDL-c<br>LDL-c<br>TG<br>Total-c     | <b>HDL-c:</b> Significant interaction of rs174570 and omega-3 on HDL-c<br><b>LDL-c:</b> Significant interaction of rs174602 and omega-3 on LDL-c<br><b>TG:</b> Gene-centric analyses demonstrated a significant interaction between variation in the <i>FADS</i> gene cluster and omega-3 intake on TG<br><b>Total-c:</b> Significant interaction of rs174602 and omega-3 on total-c ('C' allele carriers exhibited lower total-c with low omega-3 intake, while no such relationship was observed with high omega-3 intake) |
| Ching et al. 2019 (4)            | Cross-Sectional                                      | Single SNP                             | Vegetarian adults of Malaysian ancestry (n=200)                                      | <i>FADS1</i> , rs174547                                                                                                                  | <i>FADS1</i> : 11q12.2                                                     | <b>Low:</b> ≤0.45 g/day ALA<br><b>Moderate:</b> 0.46-0.64 g/day ALA<br><b>High:</b> >0.64 g/day ALA (means) (food) | Comparison between three genotypes                                                                                                                                                            | HDL-c<br>TG                         | <b>HDL-c:</b> The TT genotype had significantly lower HDL-c when ALA intake was in the moderate intake range, but there were no significant gene-omega-3 interaction on lipid levels                                                                                                                                                                                                                                                                                                                                         |
| Dumont et al. 2011 (5)           | Cross-Sectional                                      | Single SNP                             | Adolescents of European ancestry (n=573)                                             | <i>FADS1</i> , rs174547                                                                                                                  | <i>FADS1</i> : 11q12.2                                                     | <b>High:</b> >1.4 g/day ALA<br><b>Low:</b> ≤1.4 g/day ALA<br>(unclear if food and/or supplement sources)           | Major allele homozygotes vs. Minor allele carriers                                                                                                                                            | HDL-c<br>LDL-c<br>TG<br>Total-c     | <b>Total-c:</b> Significant interaction whereby the minor allele (CT+TT genotype) was associated with lower total-c when ALA intake is high as compared to when intake is low. This remained significant after assessing the interaction using ALA intake as a continuous variable.                                                                                                                                                                                                                                          |

|                                        |                                                                                       |               |                                                                                                 |                                                             |                                         |                                                                                                                                                                                                                                                  |                                                                                                                            |                                 |                                                                                                                                                                                                                                                                                                                                                                                                                                                                                                                                                                                                               |
|----------------------------------------|---------------------------------------------------------------------------------------|---------------|-------------------------------------------------------------------------------------------------|-------------------------------------------------------------|-----------------------------------------|--------------------------------------------------------------------------------------------------------------------------------------------------------------------------------------------------------------------------------------------------|----------------------------------------------------------------------------------------------------------------------------|---------------------------------|---------------------------------------------------------------------------------------------------------------------------------------------------------------------------------------------------------------------------------------------------------------------------------------------------------------------------------------------------------------------------------------------------------------------------------------------------------------------------------------------------------------------------------------------------------------------------------------------------------------|
| Dumont et al. 2018 (6)                 | Cross-Sectional                                                                       | Single SNP    | Men and women aged 35 to 74 years from the MONA LISA Study of three French populations (n=3069) | <i>FADS1</i> , rs174547                                     | <i>FADS1</i> : 11q12.2                  | <b>Low:</b> 0.6 g/day ALA (mean)<br><b>Median:</b> 0.8 g/day ALA (stratified by median for analyses)<br><b>High:</b> 1.3 g/day ALA (mean) (food and supplement)                                                                                  | Comparison between three genotypes                                                                                         | HDL-c<br>LDL-c<br>TG<br>Total-c | --                                                                                                                                                                                                                                                                                                                                                                                                                                                                                                                                                                                                            |
| Fallaize et al. 2016 (7)               | Cross-Sectional (Baseline) and Longitudinal Analyses within a Randomized Intervention | Single SNP*   | Healthy adults enrolled in the Food4Me European trial (n=1466)                                  | <i>APOE</i> , rs429358, rs7412                              | <i>APOE</i> : 19q13.32                  | <b>High:</b> >0.67 %kcal<br><b>Low:</b> <0.67 %kcal<br><b>Increased Intake:</b> reduced omega-3 intake from baseline<br><b>Decreased Intake:</b> decreased omega-3 intake from baseline (unclear if food and/or supplement sources)              | <i>APOE</i> -E4 vs. <i>APOE</i> -E4+                                                                                       | Total-c                         | <b>Total-c:</b> Cross-sectional (baseline) analysis demonstrated a significant genotype effect for <i>APOE</i> , omega-3 intake, and total-c. Longitudinal analysis (baseline to month 6) demonstrated a significant genotype effect for <i>APOE</i> , change in omega-3 intake (increase or decrease) and total-c.                                                                                                                                                                                                                                                                                           |
| Fontaine-Bisson and El-Sohemy 2007 (8) | Cross-Sectional                                                                       | Genetic Score | Men and women aged 20-29 years (n=595)                                                          | <i>TNF<math>\alpha</math></i> , rs361525, rs1800629         | <i>TNF<math>\alpha</math></i> : 6p21.33 | Intake range: 0.2-4.6 %kcal (mean intakes were 0.7 %kcal for 0/0, 0.7% kcal for 0/1 and 0.6%kcal for 1/0) (food)                                                                                                                                 | No minor allele ('A') for both SNPs (0/0) vs. One minor allele for rs361525 (1/0) vs. One minor allele for rs1800625 (0/1) | HDL-c                           | --                                                                                                                                                                                                                                                                                                                                                                                                                                                                                                                                                                                                            |
| Fontaine-Bisson et al. 2009 (9)        | Cross-Sectional                                                                       | Single SNP    | Healthy men and women aged 20-29 years (n=593)                                                  | <i>NF-<math>\kappa</math>B</i> -94Ins/Del ATTG (rs28362491) | <i>NF-<math>\kappa</math>B</i> : 4q24   | Mean intake: 0.7 %kcal (unclear if food and/or supplement sources)                                                                                                                                                                               | Ins/Ins vs. Ins/Del vs. Del/Del                                                                                            | HDL-c                           | <b>HDL-c:</b> Significant interaction between <i>NF-<math>\kappa</math>B</i> genotype and omega-3 intake on HDL-c                                                                                                                                                                                                                                                                                                                                                                                                                                                                                             |
| Hellstrand et al. 2012 (10)            | Cross-Sectional                                                                       | Single SNP    | Healthy men and women aged 45-68 years from Sweden (n=4635)                                     | <i>FADS</i> , rs174547                                      | <i>FADS</i> : 11q12.2                   | <b>Low:</b> $\leq$ 0.14 %kcal long-chain omega-3<br><b>Moderate:</b> 0.14-0.28 %kcal long-chain omega-3<br><b>High:</b> >0.28 %kcal long-chain omega-3 (tertiles of intake reported only for certain significant findings) (food and supplement) | TT vs. TC vs. CC                                                                                                           | HDL-c<br>LDL-c<br>TG            | <b>LDL-c:</b> Significant interaction between <i>FADS</i> rs174547 genotype and long-chain omega-3 on LDL-c whereby the 'C' allele was significantly associated with lower LDL-c when long-chain omega-3 intake was in the lowest tertile (but not in the moderate or highest tertile). High long-chain omega-3 intake was associated with significantly higher LDL-c for CC and TC genotypes but not TT genotypes. Stratified analysis based on sex demonstrated that these significant interactions remained for men, but not women, however there was not a significant difference in interactions by sex. |
| Hosseini-Esfahani et al. 2017 (11)     | Nested Case-Control                                                                   | Single SNP    | Healthy men and women aged $\geq$ 18 years from Iran                                            | <i>ZNF8</i> , rs13266634                                    | <i>ZNF8</i> : 8q24.11                   | <b>Tertiles for omega-3:</b><br><b>Low:</b> <0.38 %kcal<br><b>Moderate:</b> 0.38-                                                                                                                                                                | CC vs. CT+TT                                                                                                               | HDL-c<br>TG                     | <b>HDL-c:</b> Significant interaction between <i>ZNF8</i> rs13266634 genotype and omega-3 intake on the risk of low HDL-c whereby CC genotypes exhibited a decreased risk of low HDL-c with increasing intake of omega-3; this was not observed in                                                                                                                                                                                                                                                                                                                                                            |

|                        |                 |            |                                                                                                                     |                                                                                            |                        |                                                                                                                                                                                                                                                                                     |                                                                                          |                                                  |                                                                                                                                                                                                                                                                                                                                                                                                                                                                                                                                                                                                                                                                                                                                                                                                                                                                                                         |
|------------------------|-----------------|------------|---------------------------------------------------------------------------------------------------------------------|--------------------------------------------------------------------------------------------|------------------------|-------------------------------------------------------------------------------------------------------------------------------------------------------------------------------------------------------------------------------------------------------------------------------------|------------------------------------------------------------------------------------------|--------------------------------------------------|---------------------------------------------------------------------------------------------------------------------------------------------------------------------------------------------------------------------------------------------------------------------------------------------------------------------------------------------------------------------------------------------------------------------------------------------------------------------------------------------------------------------------------------------------------------------------------------------------------------------------------------------------------------------------------------------------------------------------------------------------------------------------------------------------------------------------------------------------------------------------------------------------------|
|                        |                 |            | (n=1634)                                                                                                            |                                                                                            |                        | 0.54 %kcal<br><b>High:</b> >0.54 %kcal (food)                                                                                                                                                                                                                                       |                                                                                          |                                                  | the CT+TT genotype group.<br><b>TG:</b> Significant interaction between <i>ZNF78</i> rs13266634 genotype and omega-3 intake on the risk of high TG whereby CC genotypes exhibited a decreased risk of high TG with increasing intake of omega-3; this was not exhibited in the CT+TT genotype group.                                                                                                                                                                                                                                                                                                                                                                                                                                                                                                                                                                                                    |
| Jang et al. 2014 (12)  | Cross-Sectional | Single SNP | Adult: Men and women aged 40-69 from Korea (n=4205)<br>Children: Boys and girls aged 8-13 years from Korea (n=1548) | <i>PCSK5</i> , rs1029035                                                                   | <i>PCSK5</i> : 9q21.13 | Based on overall median intake (further detailed elsewhere (12)):<br><b>Low:</b> <0.4 %kcal (food)<br><b>High:</b> >0.4 %kcal (food)                                                                                                                                                | CC vs. CA vs. AA                                                                         | HDL-c                                            | <b>HDL-c:</b> Significant interaction between <i>PCSK5</i> rs1029035 and omega-3 on HDL-c in male children and male adults. 'C' allele carriers exhibit a tendency to decrease HDL-c with omega-3, while AA genotypes exhibit the opposite effect.                                                                                                                                                                                                                                                                                                                                                                                                                                                                                                                                                                                                                                                      |
| Joffe et al. 2010 (13) | Cross-Sectional | Single SNP | Black women from South Africa, normal weight or with obesity (n=138)                                                | <i>TNFA</i> , rs1800629                                                                    | <i>TNFA</i> : 6p21.33  | ALA (amount not reported/cannot determine) (food)                                                                                                                                                                                                                                   | GG vs. GA+AA                                                                             | HDL-c<br>LDL-c<br>TG<br>Total-c<br>Total-c:HDL-c | <b>Total-c:HDL-c ratio:</b> Significant interaction between <i>TNFA</i> , rs1800629 genotypes and %kcal from ALA whereby increasing %kcal from ALA was associated with increases in Total-c:HDL-c for GG genotypes but decreases in Total-c:HDL-c ratio for GA+AA genotypes                                                                                                                                                                                                                                                                                                                                                                                                                                                                                                                                                                                                                             |
| Joffe et al. 2012 (14) | Cross-Sectional | Single SNP | Black and white women from South Africa, normal weight or with obesity (n=263)                                      | <i>TNFA</i> , rs361525                                                                     | <i>TNFA</i> : 6p21.33  | <b>Median Intakes:</b><br>omega-3: 0.28-0.36 % kcal<br>ALA: 0.21-0.26 %kcal<br>EPA: 0.02 %kcal<br>DHA: 0.04-0.08 %kcal (food)                                                                                                                                                       | GG vs. GA(+AA for one participant: black, normal weight)                                 | HDL-c<br>LDL-c<br>TG<br>Total-c<br>Total-c:HDL-c | <b>LDL-c:</b> Significant interaction for Caucasian women whereby LDL-c decreased with increasing %kcal from EPA in the GG genotype but not the GA genotype of <i>TNFA</i> , rs361525.<br><b>Total-c:</b> Significant interaction for white women whereby total-c decreased with increasing EPA and DHA intakes in the GG genotype group but not the GA genotype group of <i>TNFA</i> rs361525 but individual rates were not significant.<br><b>Total-c:HDL-c ratio:</b> Significant interaction for black women whereby Total-c:HDL-c decreased within increasing %kcal from omega-3 in the GA genotype group but not GG of <i>TNFA</i> rs361525.                                                                                                                                                                                                                                                      |
| Joffe et al. 2014 (15) | Cross-Sectional | Single SNP | Black and white women from South Africa, normal weight or with obesity (n=268)                                      | <i>IL-6</i> , -174 G>C, IVS3 (rs1800795), +281 G>T, IVS4 (rs1554606), +869 A>G (rs2069845) | <i>IL-6</i> : 7p15.3   | Black Women (%kcal/day): 0.28 omega-3, 0.21 ALA, 0.02 EPA, 0.04 DHA (normal weight); 0.36 omega-3, 0.22 ALA, 0.04 EPA, 0.08 DHA (obesity)<br>White Women (%kcal/day): 0.33 omega-3, 0.26 ALA, 0.01 EPA, 0.05 DHA (normal weight); 0.32 omega-3, 0.25 ALA, 0.02 EPA, 0.05 DHA (food) | Major allele homozygotes vs. Minor allele carriers or Comparison between three genotypes | HDL-c<br>LDL-c<br>TG<br>Total-c<br>Total-c:HDL-c | The following results were statistically significant only in white women, but not in black women:<br><b>HDL-c:</b> Significant interaction whereby HDL-c increased with increasing omega-3 and/or DHA and/or ALA intake in <i>IL-6</i> rs1800795 C allele carriers and increasing ALA intake in <i>IL-6</i> rs1554606 T allele carriers. HDL-c decreased with increasing EPA and/or DHA intake in <i>IL-6</i> rs2069845 G allele carriers.<br><b>TG:</b> Significant interaction whereby TG reduced with increasing EPA intake in <i>IL-6</i> rs1800795 C allele carriers<br><b>Total-c:HDL-c:</b> Significant interaction whereby total-c:HDL-c ratio decreased with increasing EPA intake in <i>IL-6</i> rs1800795 CC genotypes and <i>IL-6</i> rs1554606 TT genotypes, increasing DHA intake in <i>IL-6</i> rs1800795 CC genotypes, and increasing ALA intake in <i>IL-6</i> rs1554606 TT genotypes. |
| Lai et al. 2006 (16)   | Cross-Sectional | Single SNP | Men and women from the Framingham                                                                                   | <i>APOA5</i> , rs662799, rs651821, rs3135506,                                              | <i>APOA5</i> : 11q23.3 | <b>Mean Intake:</b> 0.69 %kcal omega-3<br><b>Tertiles for</b>                                                                                                                                                                                                                       | Major allele homozygotes vs. Minor allele carriers                                       | TG                                               | --                                                                                                                                                                                                                                                                                                                                                                                                                                                                                                                                                                                                                                                                                                                                                                                                                                                                                                      |

|                             |                                                                                                                         |            |                                                                                  |                                                                                        |                          |                                                                                                                                                                              |                                                        |                                 |                                                                                                                                                                                                                                                                                                                                                        |
|-----------------------------|-------------------------------------------------------------------------------------------------------------------------|------------|----------------------------------------------------------------------------------|----------------------------------------------------------------------------------------|--------------------------|------------------------------------------------------------------------------------------------------------------------------------------------------------------------------|--------------------------------------------------------|---------------------------------|--------------------------------------------------------------------------------------------------------------------------------------------------------------------------------------------------------------------------------------------------------------------------------------------------------------------------------------------------------|
|                             |                                                                                                                         |            | Heart Study (n=2148)                                                             | rs2072560, rs2266788                                                                   |                          | <b>omega-3:</b><br><b>Low:</b> <0.58 %kcal<br><b>Moderate:</b> 0.58-0.74 %kcal<br><b>High:</b> >0.74 %kcal<br>(unclear if food and/or supplement sources)                    |                                                        |                                 |                                                                                                                                                                                                                                                                                                                                                        |
| Lu et al. 2010 (17)         | Cross-Sectional                                                                                                         | Single SNP | Men and women of Doetinchem Cohort Study (n=3575)                                | <i>FADS</i> , rs174546, rs482548, rs174570                                             | <i>FADS</i> : 11q12.2    | Mean intake: 0.5 %kcal (food)                                                                                                                                                | Comparison between three genotypes                     | HDL-c<br>Total-c                | <b>Total -c:</b> In high omega-3 intake group, total-c was significantly higher with each added minor 'C' allele of rs174546                                                                                                                                                                                                                           |
| Nettleton et al. 2009 (18)  | Cross-Sectional                                                                                                         | Single SNP | Men and women of Caucasian ancestry (n=8511)                                     | <i>ANGPTL4</i> E40K (rs116843064)                                                      | <i>ANGPTL4</i> : 19p13.2 | Not Reported/Cannot Determine (food)                                                                                                                                         | Minor allele carriers vs. Non-allele carriers          | HDL-c<br>TG                     | --                                                                                                                                                                                                                                                                                                                                                     |
| Richardson et al. 2011 (19) | Meta-analysis of the Framingham Offspring Study (FOS) and the Genetics of Lipid Lowering Drugs and Diet Network (GOLDN) | Single SNP | Men and women from FOS and GOLDN studies (n=3605)                                | <i>PLIN4</i> , rs8887, rs11673616, rs892158, rs7250947, rs8102428, rs1609717, rs884164 | <i>PLIN4</i> : 19p13.3   | Mean intakes:<br><b>FOS Men:</b> 1.43 g/d<br><b>FOS Women:</b> 1.37 g/d<br><b>GOLDN Men:</b> 1.83 g/d<br><b>GOLDN Women:</b> 1.48 g/d (food and supplement)                  | Minor allele carriers vs. Non-allele carriers          | TG<br>HDL-c                     | <b>TG:</b> Significant interactions for <i>PLIN4</i> , rs884164 whereby TG levels increased in minor allele carriers with higher omega-3 intake for males and females combined, and males individually.                                                                                                                                                |
| Standl et al. 2012 (20)     | Cross-Sectional Analysis (10-year time point) within a 10-year longitudinal cohort study                                | Single SNP | 10 year-old children of the GINIplus and LISApplus birth cohort studies (n=1697) | <i>FADS1/FADS2</i> , rs174545, rs174546, rs174556, rs174561, rs174575, rs3834458       | <i>FADS1/2</i> : 11q12.2 | Median intake: 0.14 mg/MJ omega-3 (ALA+EPA+DPA+DHA) (food and supplement)                                                                                                    | Comparison between three genotypes                     | HDL-c<br>LDL-c<br>Total-c<br>TG | --                                                                                                                                                                                                                                                                                                                                                     |
| Tai et al. 2005 (21)        | Cross-Sectional                                                                                                         | Single SNP | Framingham Cohort, men and women (n=2106)                                        | <i>PPARα</i> , L162V (rs1800206)                                                       | <i>PPARα</i> : 22q13.31  | <b>High:</b> >0.69 %kcal<br><b>Low:</b> <0.69 %kcal (food)                                                                                                                   | <i>PPARα</i> : 162V carriers vs. 162L/162L homozygotes | TG<br>apoC-III                  | <b>TG:</b> 167V carriers had lower TG with high omega-3 intake compared to low omega-3 intake (gene-diet-interaction effects were NS)<br><b>apoC-III:</b> Significant gene-diet interactions; Higher apoC-III in 162V carriers with low omega-3 intake compared to 162V carriers with high omega-3 intake and 162L homozygotes with low omega-3 intake |
| Volcik et al. 2008 (22)     | Cross-Sectional (Baseline) Analysis within a Prospective Cohort                                                         | Single SNP | African American (n=3480) and Caucasian (n=10 134) men and women (N=13,614)      | <i>PPARα</i> , L162V (rs1800206), 3'UTR G>A (rs6008259), 3'UTR C>T (rs3892755)         | <i>PPARα</i> : 22q13.31  | African American:<br><b>High:</b> >0.32 g/d EPA+DHA<br><b>Low:</b> ≤0.32 g/d EPA+DHA<br>Caucasian:<br><b>High:</b> >0.22 g/d EPA+DHA<br><b>Low:</b> ≤0.22 g/d EPA+DHA (food) | Comparison between three genotypes for each SNP        | HDL-c<br>LDL-c<br>TG<br>Total-c | <b>Total-c, LDL-c:</b> African Americans (but not Caucasians) homozygous for <i>PPARα</i> (rs3892755) TT genotype with high EPA+DHA intake had significantly lower total-c and LDL-c compared to CT and TT genotypes (both high and low EPA+DHA intake)                                                                                                |

|                              |                                                        |            |                                       |                                     |                              |                                            |                                                    |                                                        |    |
|------------------------------|--------------------------------------------------------|------------|---------------------------------------|-------------------------------------|------------------------------|--------------------------------------------|----------------------------------------------------|--------------------------------------------------------|----|
| Warodomwich et al. 2009 (23) | Cross-sectional with fasting and postprandial measures | Single SNP | Men and women of GOLDN study (n=1083) | <i>TCF7L2</i> rs7903146, rs12255372 | <i>TCF7L2</i> : 10q25.2-25.3 | N/A (Median omega-3: 0.67% of kcal) (food) | Major allele homozygotes vs. Minor allele carriers | HDL-c<br>LDL-c<br>LDL-c particle size<br>TG<br>Total-c | -- |
|------------------------------|--------------------------------------------------------|------------|---------------------------------------|-------------------------------------|------------------------------|--------------------------------------------|----------------------------------------------------|--------------------------------------------------------|----|

ALA: alpha-linolenic acid, Apo: apolipoprotein, DHA: docosahexaenoic acid, EPA: eicosapentaenoic acid, HDL: high-density lipoprotein cholesterol, LDL: low-density lipoprotein cholesterol, N/A: not applicable, NS: Non-significant, sdLDL-c: small, dense, low-density lipoprotein cholesterol, SNP: single nucleotide polymorphism, TG: triglycerides

1. Intakes are total omega-3 unless otherwise specified

2. All other (not listed) gene/omega-3/lipid/lipoprotein results of interest to the present review were NS

Participants are described as “healthy” for studies that incorporated exclusion criteria for certain conditions, blood lipid levels, etc. and when studies described the population as “healthy.”

3. These results were taken from the full-text manuscript’s summary table of IL-6 results. Refer to Supplementary Tables S8-S13 in Joffe et al. 2014 (15) for several other significant results, stratified and un-stratified by ethnicity. Note: There were no corrections for multiple testing in the statistical analyses.

'--' indicates that all of the completed gene/omega-3/lipid/lipoprotein analyses were NS

\*Human *APOE* is polymorphic at two single nucleotides (rs429358 and rs7412) resulting in three different alleles (ε2, ε3 and ε4)

Supplementary Table 3: Summary of interventional studies

| Author, Year              | Study Design                                  | Genetic Approach         | Population (sample size included in analyses)               | Intervention Duration | Gene(s), SNP(s)                                                                                                                                                                                                                                                                                                                                                             | Cytogenic Location of Gene(s)                                                                                                                                                                                                                                                                                                               | Quantity, Source and Type of Omega-3                                                                                                          | Comparators                                                                                                                                                                                                                                 | Plasma Lipid/Lipoprotein Outcome(s)              | Summary of Statistically Significant Study Findings Relevant to the Research Question <sup>1</sup>                                                                                          |
|---------------------------|-----------------------------------------------|--------------------------|-------------------------------------------------------------|-----------------------|-----------------------------------------------------------------------------------------------------------------------------------------------------------------------------------------------------------------------------------------------------------------------------------------------------------------------------------------------------------------------------|---------------------------------------------------------------------------------------------------------------------------------------------------------------------------------------------------------------------------------------------------------------------------------------------------------------------------------------------|-----------------------------------------------------------------------------------------------------------------------------------------------|---------------------------------------------------------------------------------------------------------------------------------------------------------------------------------------------------------------------------------------------|--------------------------------------------------|---------------------------------------------------------------------------------------------------------------------------------------------------------------------------------------------|
| AbuMweis et al. 2018 (24) | Randomized, Crossover Controlled Intervention | Single SNP*              | Adults with at least one cardiovascular risk factor (n=129) | 4 weeks               | <i>FADS1</i> , rs174561<br><i>FADS2</i> , rs174583<br><i>ELOVL2</i> , rs953413<br><i>ELOVL5</i> , rs2397142<br><i>CETP</i> , rs5882<br><i>SCD1</i> , rs2234970,<br><i>PPARA</i> , rs6008259<br><i>LIPF</i> , rs814628<br><br>and<br><i>APOE</i> , rs429358, rs7412                                                                                                          | <i>FADS1/2</i> : 11q12.2<br><i>ELOVL2</i> : 6p24.2<br><i>ELOVL5</i> : 6p12.1<br><i>CETP</i> : 16q13<br><i>SCD1</i> : 10q24.31<br><i>PPARA</i> : 22q13.31<br><i>LIPF</i> : 10q23.31<br><i>APOE</i> : 19q13.32                                                                                                                                | Intake range: 1.0 – 2.5 g/day DHA (supplement)                                                                                                | Comparison between three genotypes for each single SNP (except <i>PPARA</i> and <i>LIPF</i> whereby analyses were major allele homozygotes vs. minor allele carriers)<br><br>and<br><i>APOE</i> -E2 vs. <i>APOE</i> -E3 vs. <i>APOE</i> -E4 | apoA1<br>apoB<br>HDL-c<br>LDL-c<br>TG<br>Total-c | --                                                                                                                                                                                          |
| Alsaleh et al. 2014 (25)  | Randomized Controlled Intervention            | Single SNP and Polygenic | Healthy men and women (n=310)                               | 12 months             | <i>CETP</i> , rs3764261,<br><i>LIPC</i> , rs1532085<br><i>APOB</i> , rs1367117<br><i>ABCG5/ABCG</i> , rs4299376<br><i>TIMD4/HAVCR1</i> , rs6882076<br><i>GCKR</i> , rs1260326<br><i>TRIB1</i> , rs2954029<br><i>ANGPTL3/DOCK7</i> , rs2131925<br><i>FADS1/2/3</i> , rs174546<br><i>GALNT2</i> , rs4846914<br><i>ABCA1</i> , rs4149268<br><i>APOE/APOC1/APOC2</i> , rs439401 | <i>CETP</i> : 16q13<br><i>LIPC</i> : 15q21.3<br><i>APOB</i> : 2p24.1<br><i>ABCG5/ABCG8</i> : 2p.21<br><i>TIMD4/HAVCR1</i> : 5q33.3<br><i>GCKR</i> : 2p23.3<br><i>TRIB1</i> : 8q24.13<br><i>ANGPTL3/DOCK7</i> : 7: 1p31.3<br><i>FADS</i> : 11q12.2<br><i>GALNT2</i> : 1q42.13<br><i>ABCA1</i> : 9q31.1<br><i>APOE/APOC1/APOC2</i> : 19q13.32 | <b>Low Dose:</b> 0.5 g/day EPA and DHA<br><b>Moderate Dose:</b> 0.9 g/day EPA and DHA<br><b>High Dose:</b> 1.8 g/day EPA and DHA (supplement) | Effect sizes per GRS risk allele after omega-3 treatment and Risk allele carriers vs. non-risk allele carriers                                                                                                                              | HDL-c<br>LDL-c<br>TG<br>Total-c                  | <b>TG:</b> significant interaction whereby 1.8 g/day EPA and DHA significantly reduced TG in T allele carriers (21.6% reduction) vs. CC genotypes (3.5% reduction) of <i>FADS1</i> rs174546 |



1  
2  
3  
4  
5  
6  
7  
8  
9  
10  
11  
12  
13  
14  
15  
16  
17  
18  
19  
20  
21  
22  
23  
24  
25  
26  
27  
28  
29  
30  
31  
32  
33  
34  
35  
36  
37  
38  
39  
40  
41  
42  
43  
44  
45  
46  
47

|                                   |                                                          |                                    |                                                |         |                                                                                                                                                                                                          |                                                                                                                                                                                |                                                                                                                    |                                                                                                                                           |                                                                                                                     |                                                                                                                                                                                                                                                                                                                                                                                                                                                                                                                           |
|-----------------------------------|----------------------------------------------------------|------------------------------------|------------------------------------------------|---------|----------------------------------------------------------------------------------------------------------------------------------------------------------------------------------------------------------|--------------------------------------------------------------------------------------------------------------------------------------------------------------------------------|--------------------------------------------------------------------------------------------------------------------|-------------------------------------------------------------------------------------------------------------------------------------------|---------------------------------------------------------------------------------------------------------------------|---------------------------------------------------------------------------------------------------------------------------------------------------------------------------------------------------------------------------------------------------------------------------------------------------------------------------------------------------------------------------------------------------------------------------------------------------------------------------------------------------------------------------|
| Armstrong et al. 2012 (26)        | Double-Blind, Placebo-Controlled Randomized Intervention | Single SNP (deletion polymorphism) | Healthy adults of African ancestry (n=98)      | 6 weeks | <i>ALOX5</i> , dd (33, 34 or 44), d5 (35, 45) and 55 (control) genotypes                                                                                                                                 | <i>ALOX5</i> : 10q11.21                                                                                                                                                        | Fish oil: 5.0 g/day containing 2.0 g/day EPA and 1.0 g/day DHA<br>Control oil: 5.0 g/day corn/soy oil (supplement) | dd vs. d5 vs. 55                                                                                                                          | TG<br>Mean lipoprotein particle diameter, total number of particles and particle concentration for: HDL-c and LDL-c | <b>TG</b> : significant interaction whereby decreases in TG from omega-3 supplementation were specific to d5 genotype group<br><b>HDL-c particle concentration</b> : significant decrease with omega-3 intervention in the d5 and 55 genotype groups compared to placebo, but no decreases in the dd genotype group<br><b>Medium HDL-c particles and HDL-c (mmol/L)</b> : significant gene-treatment interaction but no significant differences after post-hoc analysis for comparisons among genotypes                   |
| Binia et al. 2017 (27)            | Single-Arm Clinical Trial                                | Single SNP                         | Mexican adults 18-40 years (n=191)             | 6 weeks | <i>PPARA</i> , L162V (rs1800206), <i>PPARγ2</i> , P12A (rs1801282)                                                                                                                                       | <i>PPARA</i> : 22q13.31<br><i>PPARγ2</i> : 3p25.2                                                                                                                              | Fish oil: 2.7 g/day containing 1.9 g/d EPA and 0.8 g/day DHA (supplement)                                          | Major allele homozygotes vs. Minor allele carriers                                                                                        | HDL-c<br>LDL-c<br>TG<br>Total-c                                                                                     | <b>LDL-c</b> : significant increase in LDL-c among minor allele carriers ( <i>PPARγ2</i> Pro12Ala and Ala12Ala) only vs. <i>PPARγ2</i> Pro12Pro genotypes only for individuals with BMI>25.0 kg/m <sup>2</sup><br><b>Total-c</b> : significant increase in total-c among minor allele carriers ( <i>PPARγ2</i> Pro12Ala and Ala12Ala) only vs. <i>PPARγ2</i> Pro12Pro genotypes only for individuals with BMI>25.0 kg/m <sup>2</sup>                                                                                      |
| Bouchard Mercier et al. 2013 (28) | Single Arm Clinical Trial                                | Single SNP                         | Healthy adults aged 18-50 years (n=208)        | 6 weeks | <i>SREBF1</i> , rs4925115, rs4925118, rs12953299<br><i>ACLY</i> , rs8071753, rs8065502, rs2304497<br><i>ACACA</i> rs2017571, rs29221368, rs9906044, rs2229416, rs1714987, rs1266175, rs3815059, rs829165 | <i>SREBF1</i> : 17p11.2<br><i>ACLY</i> : 17q21.2<br><i>ACACA</i> : 17q12                                                                                                       | Fish oil: 5.0 g/day containing 1.9-2.2 g/day EPA and 1.1 g/day DHA (supplement)                                    | Major allele homozygotes vs. Minor allele carriers<br>or<br>Comparison between three genotypes (when minor allele frequencies were >0.05) | TG                                                                                                                  | <b>TG</b> : Significant gene-diet interaction whereby individuals with the GG genotype of <i>ACLY</i> rs8071753 and individuals with the GG or CG genotype of <i>ACACA</i> rs1714987 exhibited greater TG lower effects following omega-3 supplementation; these two SNPs explained approximately 8% of the variance in plasma TG responses to omega-3 supplementation. There were significant differences in genotype frequencies of <i>ACLY</i> rs8071753 for responders and non-responders to omega-3 for TG lowering. |
| Bouchard-Mercier et al. 2014 (29) | Single Arm Clinical Trial                                | Single SNP                         | Healthy men and women aged 18-50 years (n=208) | 6 weeks | <i>RXRα</i> (12 SNPs), <i>CPT1A</i> (9 SNPs), <i>ACADVL</i> (1 SNP), <i>ACAA2</i> (6 SNPs), <i>ABCD2</i> (8 SNPs), <i>ACOX1</i> (8 SNPs), <i>ACAA1</i> (3 SNPs) [outlined in Supplementary Table 5]      | <i>RXRα</i> : 9q34.2<br><i>CPT1A</i> : 11q13.3<br><i>ACADVL</i> : 17p13.1<br><i>ACAA2</i> : 18q21.1<br><i>ABCD2</i> : 12q12<br><i>ACOX1</i> : 17q25.1<br><i>ACAA1</i> : 3p22.2 | Fish oil: 5.0 g/day containing 1.9-2.2 g/day EPA and 1.1 g/day DHA (supplement)                                    | Major allele homozygotes vs. Minor allele carriers<br>or<br>Comparison between three genotypes (when minor allele frequencies were >0.05) | TG                                                                                                                  | <b>TG</b> : There were significant gene-diet interaction effects on TG responses to omega-3 for <i>RXRα</i> rs11185660 genotype dependent on total fat intake, <i>RXRα</i> rs10881576, rs12339187 and rs11185660 genotypes dependent on saturated fat intake, and <i>ACOX1</i> rs17583163 dependent on total polyunsaturated fat intake                                                                                                                                                                                   |
| Bouchard-Mercier et al. 2014 (30) | Single Arm Clinical Trial                                | Single SNP                         | Healthy men and women aged 18-50 years (n=208) | 6 weeks | <i>GCK</i> (13 SNPs) [outlined in Supplementary Table 5]                                                                                                                                                 | <i>GCK</i> : 7p13                                                                                                                                                              | Fish oil: 5.0 g/day containing 1.9-2.2 g/day EPA and 1.1 g/day DHA (supplement)                                    | Major allele homozygotes vs. Minor allele carriers<br>or<br>Comparison between three genotypes                                            | TG                                                                                                                  | <b>TG</b> : CC genotypes of <i>GCK</i> rs741038 exhibited significantly greater TG reduction in response to omega-3 when their carbohydrate intake was high (>48.6%kcal) compared to those with the CC genotype of rs741038 with low carbohydrate intake (≤48.6%kcal) and compared to CT or TT genotypes with either high or low carbohydrate intake.                                                                                                                                                                     |

|    |                                 |                                                                      |             |                                                              |                  |                                                                        |                         |                                                                                                                                                                                                                                                                                                            |                                                                                  |                                                                        |                                                                                                                                                                                                                                                                                                     |
|----|---------------------------------|----------------------------------------------------------------------|-------------|--------------------------------------------------------------|------------------|------------------------------------------------------------------------|-------------------------|------------------------------------------------------------------------------------------------------------------------------------------------------------------------------------------------------------------------------------------------------------------------------------------------------------|----------------------------------------------------------------------------------|------------------------------------------------------------------------|-----------------------------------------------------------------------------------------------------------------------------------------------------------------------------------------------------------------------------------------------------------------------------------------------------|
| 3  |                                 |                                                                      |             |                                                              |                  |                                                                        |                         | (when minor allele frequencies were >0.05)                                                                                                                                                                                                                                                                 |                                                                                  |                                                                        |                                                                                                                                                                                                                                                                                                     |
| 4  |                                 |                                                                      |             |                                                              |                  |                                                                        |                         |                                                                                                                                                                                                                                                                                                            |                                                                                  |                                                                        |                                                                                                                                                                                                                                                                                                     |
| 5  |                                 |                                                                      |             |                                                              |                  |                                                                        |                         |                                                                                                                                                                                                                                                                                                            |                                                                                  |                                                                        |                                                                                                                                                                                                                                                                                                     |
| 6  | Caron-Dorval et al. 2008 (31)   | Single Arm Clinical Trial                                            | Single SNP  | Healthy men of Caucasian ancestry aged 18-55 years (n=28)    | 6 weeks          | <i>PPARα</i> , L162V (rs1800206)                                       | <i>PPARα</i> : 22q13.31 | Fish oil: 5.0 g/day containing 1.9 g/day EPA and 1.1 g/day DHA (supplement)                                                                                                                                                                                                                                | V162 carriers vs. non-carriers                                                   | apoB-100<br>HDL-c<br>LDL-c<br>TG<br>Total-c<br>Total-C:HDL-c           | --                                                                                                                                                                                                                                                                                                  |
| 7  |                                 |                                                                      |             |                                                              |                  |                                                                        |                         |                                                                                                                                                                                                                                                                                                            |                                                                                  |                                                                        |                                                                                                                                                                                                                                                                                                     |
| 8  |                                 |                                                                      |             |                                                              |                  |                                                                        |                         |                                                                                                                                                                                                                                                                                                            |                                                                                  |                                                                        |                                                                                                                                                                                                                                                                                                     |
| 9  |                                 |                                                                      |             |                                                              |                  |                                                                        |                         |                                                                                                                                                                                                                                                                                                            |                                                                                  |                                                                        |                                                                                                                                                                                                                                                                                                     |
| 10 |                                 |                                                                      |             |                                                              |                  |                                                                        |                         |                                                                                                                                                                                                                                                                                                            |                                                                                  |                                                                        |                                                                                                                                                                                                                                                                                                     |
| 11 |                                 |                                                                      |             |                                                              |                  |                                                                        |                         |                                                                                                                                                                                                                                                                                                            |                                                                                  |                                                                        |                                                                                                                                                                                                                                                                                                     |
| 12 |                                 |                                                                      |             |                                                              |                  |                                                                        |                         |                                                                                                                                                                                                                                                                                                            |                                                                                  |                                                                        |                                                                                                                                                                                                                                                                                                     |
| 13 |                                 |                                                                      |             |                                                              |                  |                                                                        |                         |                                                                                                                                                                                                                                                                                                            |                                                                                  |                                                                        |                                                                                                                                                                                                                                                                                                     |
| 14 | Carvalho-Wells et al. 2012 (32) | Sequential Non-Randomized, Cross-Over Dietary Intervention           | Single SNP* | Healthy men and women aged 35-70 years (n=88)                | 8 weeks per diet | <i>APOE</i> , rs429358, rs7412                                         | <i>APOE</i> : 19q13.32  | <b>Low-Fat:</b><br>4.0 mg/day EPA, 10.6 mg/d DPA, 11.7 mg/d DHA<br><b>High-SFA:</b><br>20.2 mg/d EPA, 27.1 mg/d DPA, 15.4 mg/d DHA<br><b>High-SFA+DHA:</b><br>524.3 mg/d EPA, 215.5 mg/d DPA, 3017.3 mg/d DHA [actual intakes reported (33)] (supplemental DHA for High-SFA+DHA; others from food sources) | <i>APOE</i> -E3/3 vs. <i>APOE</i> -E3/4                                          | apoB<br>apoC-III<br>apoE<br>HDL-c<br>LDL-c<br>sdLDL-c<br>TG<br>Total-c | <b>TG:</b> Significant diet x genotype interaction for TG; greater TG lowering response to high-SFA+DHA diet in <i>APOE</i> -E3/4 carriers (compared to high-SFA diet alone)                                                                                                                        |
| 15 |                                 |                                                                      |             |                                                              |                  |                                                                        |                         |                                                                                                                                                                                                                                                                                                            |                                                                                  |                                                                        |                                                                                                                                                                                                                                                                                                     |
| 16 |                                 |                                                                      |             |                                                              |                  |                                                                        |                         |                                                                                                                                                                                                                                                                                                            |                                                                                  |                                                                        |                                                                                                                                                                                                                                                                                                     |
| 17 |                                 |                                                                      |             |                                                              |                  |                                                                        |                         |                                                                                                                                                                                                                                                                                                            |                                                                                  |                                                                        |                                                                                                                                                                                                                                                                                                     |
| 18 |                                 |                                                                      |             |                                                              |                  |                                                                        |                         |                                                                                                                                                                                                                                                                                                            |                                                                                  |                                                                        |                                                                                                                                                                                                                                                                                                     |
| 19 |                                 |                                                                      |             |                                                              |                  |                                                                        |                         |                                                                                                                                                                                                                                                                                                            |                                                                                  |                                                                        |                                                                                                                                                                                                                                                                                                     |
| 20 |                                 |                                                                      |             |                                                              |                  |                                                                        |                         |                                                                                                                                                                                                                                                                                                            |                                                                                  |                                                                        |                                                                                                                                                                                                                                                                                                     |
| 21 |                                 |                                                                      |             |                                                              |                  |                                                                        |                         |                                                                                                                                                                                                                                                                                                            |                                                                                  |                                                                        |                                                                                                                                                                                                                                                                                                     |
| 22 |                                 |                                                                      |             |                                                              |                  |                                                                        |                         |                                                                                                                                                                                                                                                                                                            |                                                                                  |                                                                        |                                                                                                                                                                                                                                                                                                     |
| 23 | Caslake et al. 2008 (34)        | Double-Blind, Randomized, Placebo-Controlled, Crossover Intervention | Single SNP* | Healthy men and women aged 20-70 years (n=312)               | 8 weeks per diet | <i>APOE</i> , rs429358, rs7412                                         | <i>APOE</i> : 19q13.32  | Control oil: 0.0 g/d EPA and DHA<br>Fish oil: 0.7 g/d EPA and DHA<br>Fish oil: 1.8 g/d EPA and DHA (supplement)                                                                                                                                                                                            | <i>APOE</i> -E2/E2 + E2/E3 vs. <i>APOE</i> -E3/E3 vs. <i>APOE</i> -E3/E4 + E4/E4 | HDL-c<br>LDL-c<br>TG<br>Total-c                                        | <b>TG:</b> Significant interaction between treatment x sex x genotype whereby <i>APOE</i> -E3/E4 + E4/E4 males exhibited the greatest TG reductions with both 0.7 g/d EPA and DHA as well as 1.8 g/d EPA and DHA compared to other genotypes                                                        |
| 24 |                                 |                                                                      |             |                                                              |                  |                                                                        |                         |                                                                                                                                                                                                                                                                                                            |                                                                                  |                                                                        |                                                                                                                                                                                                                                                                                                     |
| 25 |                                 |                                                                      |             |                                                              |                  |                                                                        |                         |                                                                                                                                                                                                                                                                                                            |                                                                                  |                                                                        |                                                                                                                                                                                                                                                                                                     |
| 26 |                                 |                                                                      |             |                                                              |                  |                                                                        |                         |                                                                                                                                                                                                                                                                                                            |                                                                                  |                                                                        |                                                                                                                                                                                                                                                                                                     |
| 27 |                                 |                                                                      |             |                                                              |                  |                                                                        |                         |                                                                                                                                                                                                                                                                                                            |                                                                                  |                                                                        |                                                                                                                                                                                                                                                                                                     |
| 28 | Cormier et al. 2012 (35)        | Single Arm Clinical Trial                                            | Single SNP  | Healthy men and women aged 18-50 years (n=208)               | 6 weeks          | <i>FADS</i> gene cluster (19 SNPs) [outlined in Supplementary Table 5] | <i>FADS</i> : 11q12.2   | Fish oil: 5.0 g/day containing 1.9 g/day EPA and 1.1 g/day DHA (supplement)                                                                                                                                                                                                                                | Major allele homozygotes vs. Minor allele carriers                               | TG                                                                     | --                                                                                                                                                                                                                                                                                                  |
| 29 |                                 |                                                                      |             |                                                              |                  |                                                                        |                         |                                                                                                                                                                                                                                                                                                            |                                                                                  |                                                                        |                                                                                                                                                                                                                                                                                                     |
| 30 |                                 |                                                                      |             |                                                              |                  |                                                                        |                         |                                                                                                                                                                                                                                                                                                            |                                                                                  |                                                                        |                                                                                                                                                                                                                                                                                                     |
| 31 |                                 |                                                                      |             |                                                              |                  |                                                                        |                         |                                                                                                                                                                                                                                                                                                            |                                                                                  |                                                                        |                                                                                                                                                                                                                                                                                                     |
| 32 | Dang et al. 2015 (36)           | Single Arm Clinical Trial                                            | Single SNP* | Healthy men and women aged 20-35 years (n=80)                | 4 weeks          | <i>APOE</i> , rs429358, rs7412                                         | <i>APOE</i> : 19q13.32  | Fish oil containing 900 mg EPA and 680 mg DHA (supplement)                                                                                                                                                                                                                                                 | <i>APOE</i> -E4+ vs. <i>APOE</i> -E4-                                            | HDL-c<br>LDL-c<br>TG<br>Total-c                                        | --                                                                                                                                                                                                                                                                                                  |
| 33 |                                 |                                                                      |             |                                                              |                  |                                                                        |                         |                                                                                                                                                                                                                                                                                                            |                                                                                  |                                                                        |                                                                                                                                                                                                                                                                                                     |
| 34 |                                 |                                                                      |             |                                                              |                  |                                                                        |                         |                                                                                                                                                                                                                                                                                                            |                                                                                  |                                                                        |                                                                                                                                                                                                                                                                                                     |
| 35 |                                 |                                                                      |             |                                                              |                  |                                                                        |                         |                                                                                                                                                                                                                                                                                                            |                                                                                  |                                                                        |                                                                                                                                                                                                                                                                                                     |
| 36 |                                 |                                                                      |             |                                                              |                  |                                                                        |                         |                                                                                                                                                                                                                                                                                                            |                                                                                  |                                                                        |                                                                                                                                                                                                                                                                                                     |
| 37 | Dawczynski et al. 2013 (37)     | Randomized, Placebo-Controlled, Double-Blind Intervention            | Single SNP  | Men and women with TG ≥ 1.7 mmol/L, otherwise healthy (n=47) | 10 weeks         | <i>CD36</i> , rs1761667, rs1049673                                     | <i>CD36</i> : 7q21.11   | Yogurt with lower dose fish oil: 0.8g/day omega-3 containing 0.01g ALA, 0.44g EPA, 0.06g DPA and 0.31g DHA (fish oil)<br><br>Yogurt with higher dose fish oil: 3.0 g/day omega-3                                                                                                                           | Comparison between three genotypes                                               | HDL-c<br>TG                                                            | <b>HDL-c:</b> In response to omega-3 supplementation (0.8-3.0 g/day), HDL-c increased in GA genotype of <i>CD36</i> rs1761667 and CG genotype of <i>CD36</i> rs1049673.<br><b>TG:</b> In response to omega-3 supplementation (0.8-3.0 g/day), TG decreased in GA genotype of <i>CD36</i> rs1761667. |
| 38 |                                 |                                                                      |             |                                                              |                  |                                                                        |                         |                                                                                                                                                                                                                                                                                                            |                                                                                  |                                                                        |                                                                                                                                                                                                                                                                                                     |
| 39 |                                 |                                                                      |             |                                                              |                  |                                                                        |                         |                                                                                                                                                                                                                                                                                                            |                                                                                  |                                                                        |                                                                                                                                                                                                                                                                                                     |
| 40 |                                 |                                                                      |             |                                                              |                  |                                                                        |                         |                                                                                                                                                                                                                                                                                                            |                                                                                  |                                                                        |                                                                                                                                                                                                                                                                                                     |
| 41 |                                 |                                                                      |             |                                                              |                  |                                                                        |                         |                                                                                                                                                                                                                                                                                                            |                                                                                  |                                                                        |                                                                                                                                                                                                                                                                                                     |

1  
2  
3  
4  
5  
6  
7  
8  
9  
10  
11  
12  
13  
14  
15  
16  
17  
18  
19  
20  
21  
22  
23  
24  
25  
26  
27  
28  
29  
30  
31  
32  
33  
34  
35  
36  
37  
38  
39  
40  
41  
42  
43  
44  
45  
46  
47

|                           |                                                                 |                              |                                                                                         |                                  |                                                                                                                                               |                                                                               |                                                                                                                   |                                                                                                                                                                                                                                                                                                                 |                                                                                             |                                                                                                                                                                                                                                                                                                                                                                                             |
|---------------------------|-----------------------------------------------------------------|------------------------------|-----------------------------------------------------------------------------------------|----------------------------------|-----------------------------------------------------------------------------------------------------------------------------------------------|-------------------------------------------------------------------------------|-------------------------------------------------------------------------------------------------------------------|-----------------------------------------------------------------------------------------------------------------------------------------------------------------------------------------------------------------------------------------------------------------------------------------------------------------|---------------------------------------------------------------------------------------------|---------------------------------------------------------------------------------------------------------------------------------------------------------------------------------------------------------------------------------------------------------------------------------------------------------------------------------------------------------------------------------------------|
|                           |                                                                 |                              |                                                                                         |                                  |                                                                                                                                               |                                                                               | containing 0.07g ALA, 1.59g EPA, 0.23g DPA and 1.12g DHA (fish oil)                                               |                                                                                                                                                                                                                                                                                                                 |                                                                                             |                                                                                                                                                                                                                                                                                                                                                                                             |
|                           |                                                                 |                              |                                                                                         |                                  |                                                                                                                                               |                                                                               | Control yogurt: commercial whole fruit yogurt with 3.5% milk fat (food)                                           |                                                                                                                                                                                                                                                                                                                 |                                                                                             |                                                                                                                                                                                                                                                                                                                                                                                             |
| Ferguson et al. 2010 (38) | Randomized Intervention and Cross-Sectional (Baseline) Analysis | Single SNP                   | Men and women with metabolic syndrome from LIPGENE cohort (n=450)                       | 12 weeks                         | <i>NOS3</i> , rs11771443, rs1800783, rs1800779, rs1799983, rs3918227, rs743507                                                                | <i>NOS3</i> : 7q36.1                                                          | 1.24 g/d EPA+DHA supplement (intervention); quantity of omega-3 not reported for observational analyses           | Major allele homozygotes vs. Minor allele carriers                                                                                                                                                                                                                                                              | apoA-I<br>apoB<br>apoB-48<br>apoC-II<br>apoC-III<br>apoE<br>HDL-c<br>LDL-c<br>TG<br>Total-c | <b>TG:</b> For <i>NOS3</i> rs1799983 minor-allele (A) carriers only, the observational analysis indicated higher TG with lower EPA+DHA intake (and lower TG with higher EPA+DHA intake). Post-intervention with omega-3 supplementation indicated that only minor-allele (A) carriers exhibited significant TG reduction (accompanied by increases in plasma omega-3).                      |
| Harsløf et al. 2014 (39)  | Randomized, Controlled Intervention                             | Single SNP and Genetic Score | Infants of Danish ancestry (n=133)                                                      | 9 months                         | <i>PPARγ2</i> , Pro12Ala (rs1801282), <i>FADS1</i> , rs1535, <i>FADS2</i> , rs174575, <i>FADS3</i> , rs174448, <i>COX2</i> , rs5275, rs689466 | <i>PPARγ2</i> : 3p25.2<br><i>FADS</i> : 11q12.2<br><i>COX2</i> : 1q25.2-q25.3 | 5.0 mL/day fish oil (median reported intake: 3.8 g/day containing 630 mg/day EPA and 620 mg/day DHA) (supplement) | <i>PPARγ2</i> genotype analyses were by major allele homozygotes vs. heterozygotes<br><br>and<br><br><i>FADS</i> genotype analyses were by the number of DHA-increasing alleles<br><br>and<br><br><i>COX2</i> genotype analyses were by major allele homozygotes vs. heterozygotes vs. minor allele homozygotes | HDL-c<br>LDL-c<br>TG<br>Total-c                                                             | <b>TG:</b> <i>PPARγ2</i> heterozygotes exhibited reduced TG in response to omega-3 when compared to <i>PPARγ2</i> heterozygotes in the control (sunflower oil) group                                                                                                                                                                                                                        |
| Itariu et al. 2012 (40)   | Randomized, Controlled Intervention                             | Single SNP                   | Men and women without diabetes with a BMI ≥40 kg/m <sup>2</sup> aged 20-65 years (n=55) | 8 weeks                          | <i>PPARγ2</i> , Pro12Ala (rs1801282)                                                                                                          | <i>PPARγ2</i> : 3p25.2                                                        | Fish oil containing 3.4 g/day EPA + DHA (supplement)                                                              | <i>PPARγ2</i> , Ala12 carriers vs. Pro12Pro                                                                                                                                                                                                                                                                     | apoB<br>HDL-c<br>LDL-c<br>TG<br>Total-c                                                     | <b>apoB:</b> Significant increases in apoB with omega-3 intervention in Ala12 carriers when compared to Pro12 carriers.<br><b>Total-c:</b> Significant interaction effect whereby increases in total-c were exhibited with omega-3 intervention in Ala12 carriers when compared to the Pro12Pro genotype.                                                                                   |
| Jackson et al. 2012 (41)  | Non-Randomized Intervention                                     | Single SNP*                  | Healthy men aged 35-70 years (n=23)                                                     | 8 weeks and 480-min postprandial | <i>APOE</i> , rs429358, rs7412                                                                                                                | <i>APOE</i> : 19q13.32                                                        | Fish oil containing 3.45 g/day DHA (supplement)                                                                   | <i>APOE</i> -E3/3 vs. <i>APOE</i> -E3/4                                                                                                                                                                                                                                                                         | apoB<br>apoC-III<br>apoE<br>HDL-c<br>LDL-c<br>TG                                            | <b>TG:</b> <i>APOE</i> -E3/E4 exhibited reduced fasting TG in response to a high saturated fat + DHA intervention when compared to the high saturated fat diet alone. There was also a significant interaction (meal x time x genotype) for the postprandial TG lowering response whereby <i>APOE</i> -E3/4 consuming a high saturated fat + DHA intervention exhibited significantly lower |

1  
2  
3  
4  
5  
6  
7  
8  
9  
10  
11  
12  
13  
14  
15  
16  
17  
18  
19  
20  
21  
22  
23  
24  
25  
26  
27  
28  
29  
30  
31  
32  
33  
34  
35  
36  
37  
38  
39  
40  
41  
42  
43  
44  
45  
46  
47

|                           |                                     |             |                                                                     |                      |                                                                                                                                                             |                                                                                                                          |                                                                                                                                                                                 |                                                                                                                                  |                                     |                                                                                                                                                                                                                                                                                                                                                                                                                                                                                                                                                                                                                                                                                                                                                                                               |
|---------------------------|-------------------------------------|-------------|---------------------------------------------------------------------|----------------------|-------------------------------------------------------------------------------------------------------------------------------------------------------------|--------------------------------------------------------------------------------------------------------------------------|---------------------------------------------------------------------------------------------------------------------------------------------------------------------------------|----------------------------------------------------------------------------------------------------------------------------------|-------------------------------------|-----------------------------------------------------------------------------------------------------------------------------------------------------------------------------------------------------------------------------------------------------------------------------------------------------------------------------------------------------------------------------------------------------------------------------------------------------------------------------------------------------------------------------------------------------------------------------------------------------------------------------------------------------------------------------------------------------------------------------------------------------------------------------------------------|
|                           |                                     |             |                                                                     |                      |                                                                                                                                                             |                                                                                                                          |                                                                                                                                                                                 |                                                                                                                                  | Total-c                             | postprandial TG, TG area under the curve, and TG maximum concentration compared to those consuming the high saturated fat diet alone.                                                                                                                                                                                                                                                                                                                                                                                                                                                                                                                                                                                                                                                         |
| Jackson et al. 2017 (42)  | Non-Randomized Intervention         | Single SNP* | Healthy men aged 35-70 years (n=23)                                 | 480-min postprandial | <i>APOE</i> , rs429358, rs7412                                                                                                                              | <i>APOE</i> : 19q13.32                                                                                                   | Fish oil containing 3.45 g/day DHA (supplement)                                                                                                                                 | <i>APOE</i> -E3/3 vs. <i>APOE</i> -E3/4                                                                                          | apoB-48<br>apoB-100                 | --                                                                                                                                                                                                                                                                                                                                                                                                                                                                                                                                                                                                                                                                                                                                                                                            |
| Lindi et al. 2003 (43)    | Randomized Intervention             | Single SNP  | Healthy men and women aged 30-65 years (n=150)                      | 3 months             | <i>PPAR</i> $\gamma$ 2, Pro12Ala (rs1801282)                                                                                                                | <i>PPAR</i> $\gamma$ 2: 3p25.2                                                                                           | Fish oil containing 2.4 g/d EPA + DHA (supplement)                                                                                                                              | <i>PPAR</i> $\gamma$ 2, Ala12 carriers vs. Pro12Pro                                                                              | HDL-c<br>LDL-c<br>TG<br>Total-c     | <b>TG:</b> Compared to Pro12Pro, Ala12 carriers exhibited significantly greater TG reductions in response to omega-3 supplementation only when total fat intake was $\leq$ 37 %kcal or SFA intake was $\leq$ 10 %kcal                                                                                                                                                                                                                                                                                                                                                                                                                                                                                                                                                                         |
| Lindman et al. (44)       | Randomized, Controlled Intervention | Single SNP  | Men at high risk of cardiovascular disease aged 65-75 years (n=204) | 6 months             | <i>FVII</i> , rs6046                                                                                                                                        | <i>FVII</i> : 13q34                                                                                                      | Fish oil containing 2.4 g/d EPA + DHA<br><br>Dietary advice including recommendations to increase omega-3 (supplement and food)                                                 | Major allele homozygotes vs. Minor allele carriers                                                                               | TG                                  | --                                                                                                                                                                                                                                                                                                                                                                                                                                                                                                                                                                                                                                                                                                                                                                                            |
| Madden et al. 2008 (45)   | Non-Randomized Intervention         | Single SNP  | Healthy men aged 43-84 years (n=111)                                | 12 weeks             | <i>CD36</i> , rs1527483, rs1049673, rs1761667, rs1984112                                                                                                    | <i>CD36</i> : 7q21.11                                                                                                    | Fish oil containing 1.02 g/d EPA and 0.69 g/d DHA (supplement)                                                                                                                  | For each SNP: AA vs. AG vs. GG                                                                                                   | HDL-c<br>LDL-c<br>LDL-c:HDL-c<br>TG | <b>TG:</b> In response to omega-3 supplementation, TG significantly reduced only in individuals with the GG genotype, for each SNP individually (i.e. for rs1527483, rs1049673, rs1761667 and rs1984112 individually)<br><b>LDL-c:</b> In response to omega-3 supplementation, LDL-c increased only in individuals with the rs1761667 AA genotype as well as for individuals with the rs1984112 AA genotype<br><b>HDL-c:</b> In response to omega-3 supplementation, HDL-c significantly increased in individuals with rs1761667 AA or AG as well as for individuals with the CC or CG genotype for either rs1984112, rs1527483 and/or rs1049673; NOTE: rs1527483 results should be interpreted with caution due to low sample sizes for AA and AG genotypes thus reducing statistical power) |
| Markovic et al. 2004 (46) | Single-Arm Clinical Trial           | Single SNP  | Healthy men (n=159)                                                 | 12 weeks             | <i>TNF</i> $\alpha$ , -308 (rs1800629)<br><i>LT</i> - $\alpha$ , +252 (rs909253)<br><i>IL</i> -1 $\beta$ , -511 (rs16944)<br><i>IL</i> -6, -174 (rs1800795) | <i>TNF</i> $\alpha$ : 6p21.33<br><i>LT</i> - $\alpha$ : 6p21.33<br><i>IL</i> -1 $\beta$ : 2q14.1<br><i>IL</i> -6: 7p15.3 | Fish oil containing 1.8 g/d EPA+DHA (supplement)                                                                                                                                | Major allele homozygotes vs. Minor allele carriers<br>or<br>Comparison between three genotypes (depending on allele frequencies) | TG                                  | <b>TG:</b> Significant negative correlation between pre-supplementation TG and change of TG during omega-3 supplementation for all genotypes of genes studied except for <i>LT</i> - $\alpha$ rs909253 GG genotype and <i>IL</i> -1 $\beta$ rs16944 TT genotype. In <i>LT</i> - $\alpha$ rs909253 AA genotype and <i>TNF</i> $\alpha$ rs1800629 AA genotype, signification association between BMI (divided in tertiles) and TG changes.                                                                                                                                                                                                                                                                                                                                                      |
| McColley et al. 2011 (47) | Crossover Intervention              | Single SNP  | Healthy post-menopausal women (n=16)                                | 8 weeks per diet     | <i>FABP</i> 2, rs1799883                                                                                                                                    | <i>FABP</i> 2: 4q26                                                                                                      | <b>High-Fat:</b> 50 %kcal from dietary fat<br><b>Low-Fat:</b> 20 %kcal from dietary fat<br><b>Low-Fat + omega-3:</b> 23% kcal from dietary fat with 3 %kcal from omega-3 (food) | Major allele homozygotes vs. Minor allele carriers                                                                               | TG                                  | --                                                                                                                                                                                                                                                                                                                                                                                                                                                                                                                                                                                                                                                                                                                                                                                            |

1  
2  
3  
4  
5  
6  
7  
8  
9  
10  
11  
12  
13  
14  
15  
16  
17  
18  
19  
20  
21  
22  
23  
24  
25  
26  
27  
28  
29  
30  
31  
32  
33  
34  
35  
36  
37  
38  
39  
40  
41  
42  
43  
44  
45  
46  
47

|                                                    |                               |                                                                      |             |                                                                                  |                                              |                                                                                                            |                                                                          |                                                                                                                         |                                                                                                                            |                                                              |                                                                                                                                                                                                                                                                                                                                                                                                                                                                                                                                                                                                                                                                                                                                                                       |
|----------------------------------------------------|-------------------------------|----------------------------------------------------------------------|-------------|----------------------------------------------------------------------------------|----------------------------------------------|------------------------------------------------------------------------------------------------------------|--------------------------------------------------------------------------|-------------------------------------------------------------------------------------------------------------------------|----------------------------------------------------------------------------------------------------------------------------|--------------------------------------------------------------|-----------------------------------------------------------------------------------------------------------------------------------------------------------------------------------------------------------------------------------------------------------------------------------------------------------------------------------------------------------------------------------------------------------------------------------------------------------------------------------------------------------------------------------------------------------------------------------------------------------------------------------------------------------------------------------------------------------------------------------------------------------------------|
| 3<br>4<br>5<br>6<br>7                              | Minihane et al. 2000 (48)     | Double-Blind, Randomized, Placebo-Controlled, Crossover Intervention | Single SNP* | Healthy men aged 30-70 years at risk of atherogenic lipoprotein phenotype (n=50) | 6 weeks per diet and 480 minute postprandial | <i>APOE</i> , rs429358, rs7412                                                                             | <i>APOE</i> : 19q13.32                                                   | Fish oil containing 3.0 g/d EPA and DHA, Control oil: 6.0 g/d olive oil capsule (supplement)                            | <i>APOE</i> -E2/E3 vs. <i>APOE</i> -E3/E3 vs. <i>APOE</i> -E3/E4 + E4/E4                                                   | HDL-c<br>LDL-c<br>TG<br>Total-c<br>Total-c:HDL               | <b>TG</b> : Postprandial: Significantly greater reduction in TG incremental area under postprandial TG curve in <i>APOE</i> -E2/E3 relative to other <i>APOE</i> genotype categories<br><b>Total-c</b> : 6-week: <i>APOE</i> -E3/E4 + E4/E4 genotype group exhibited significantly different changes in total-c (increase), relative to other <i>APOE</i> genotypes, whereby reductions in total-c occurred                                                                                                                                                                                                                                                                                                                                                           |
| 8<br>9<br>10<br>11<br>12<br>13                     | Olano-Martin et al. 2010 (49) | Randomized, Cross-Over Intervention                                  | Single SNP* | Healthy normolipidemic men (n=38)                                                | 4 weeks per diet                             | <i>APOE</i> , rs429358, rs7412                                                                             | <i>APOE</i> : 19q13.32                                                   | EPA-rich fish oil: 3.3 g/d EPA<br>DHA-rich fish oil: 3.7 g/d DHA<br>Control oil: 80:20 palm olein:soyabean (supplement) | <i>APOE</i> -E3/3 vs. <i>APOE</i> -E3/4 (carriers)                                                                         | apoB<br>apoE<br>HDL-c<br>LDL-c<br>TG<br>TG:HDL-c<br>Total-c  | <b>apoB, LDL-c</b> : In <i>APOE</i> -E4 carriers only, DHA-rich oil treatment resulted in significant increases in apoB and LDL-c<br><b>TG</b> : Significant reduction in TG in response to both EPA and DHA in <i>APOE</i> -E3/E3 group; significant reduction in TG in <i>APOE</i> -E4 carriers with EPA only. No significant interactions.<br><b>Total-c</b> : Significant genotype x treatment interaction whereby <i>APOE</i> -E4 carriers exhibit total-c reductions in response to EPA-rich oil.                                                                                                                                                                                                                                                               |
| 14<br>15<br>16<br>17<br>18<br>19                   | Quellette et al. 2013 (50)    | Single-Arm Clinical Trial                                            | Single SNP  | Healthy men and women aged 18-50 (n=210)                                         | 6 weeks                                      | <i>GPAM</i> (3 SNPs), <i>AGPAT3</i> (13 SNPs), <i>AGPAT4</i> (35 SNPs) [outlined in Supplementary Table 5] | <i>GPAM</i> : 10q25.2<br><i>AGPAT3</i> : 21q22.3<br><i>AGPAT4</i> : 6q26 | Fish oil containing 1.9-2.2 g/d EPA + 1.1 g/d DHA (supplement)                                                          | Major allele homozygotes vs. Minor allele carriers or Comparison between three genotypes (depending on allele frequencies) | HDL-c<br>LDL-c<br>TG<br>Total-c                              | <b>LDL-c</b> : Significant <i>GPAM</i> , rs2792751 genotype x supplementation interaction on LDL-c<br><b>TG</b> : Significant genotype x supplementation interaction on TG for <i>GPAM</i> , rs2792751 and rs17129561 as well as <i>AGPAT4</i> , rs9458172 and rs3798943                                                                                                                                                                                                                                                                                                                                                                                                                                                                                              |
| 20<br>21<br>22<br>23<br>24<br>25<br>26<br>27<br>28 | Quellette et al. 2014 (51)    | Single-Arm Clinical Trial                                            | Single SNP  | Healthy men and women 18-50 years (n=208)                                        | 6 weeks                                      | <i>MGLL</i> (18 SNPs) [outlined in Supplementary Table 5]                                                  | <i>MGLL</i> : 3q21.3                                                     | Fish oil containing 1.9-2.2 g/d EPA + 1.1 g/d DHA (supplement)                                                          | Major allele homozygotes vs. Minor allele carriers or Comparison between three genotypes (depending on allele frequencies) | apoB<br>HDL-c<br>LDL-c<br>LDL particle size<br>TG<br>Total-c | <b>LDL-c</b> : Significant interactions for <i>MGLL</i> rs6776142, rs555183, rs782444, rs6787155 and rs1466571 whereby omega-3 supplementation modulated LDL-c levels; rs782444 and rs555183 minor allele homozygotes more likely to be negative responders to omega-3 supplementation (i.e. exhibit reduced LDL-c); rs6780384, rs782444 and rs6787155 major allele homozygotes more likely to be negative responders to omega-3 supplementation<br><b>LDL particle size</b> : Significant interactions for <i>MGLL</i> rs782440, rs13076543 and rs9877819 whereby omega-3 supplementation modulated LDL particle size; rs549662 minor allele homozygotes more likely to be positive responders to omega-3 supplementation (i.e. exhibit increased LDL particle size) |
| 29<br>30<br>31<br>32                               | Paschos et al. 2005 (52)      | Single-Arm Clinical Trial                                            | Single SNP* | Men with dyslipidemia, aged 35 to 67 years (n=50)                                | 12 weeks                                     | <i>APOE</i> , rs429358, rs7412                                                                             | <i>APOE</i> : 19q13.32                                                   | 8.1 g/day ALA (via 15 ml of Flaxseed oil supplementation)                                                               | <i>APOE</i> -E2/E3 vs. <i>APOE</i> -E3/E3 vs. <i>APOE</i> -E3/E4                                                           | ApoA-I<br>ApoB<br>HDL-c<br>LDL-c<br>TG<br>Total-c            | <b>ApoA-I</b> : Significant decrease in E3/E3<br><b>HDL-c</b> : Significant decrease in E3/E3                                                                                                                                                                                                                                                                                                                                                                                                                                                                                                                                                                                                                                                                         |
| 33<br>34<br>35<br>36<br>37<br>38<br>39<br>40       | Pishva et al. 2010 (53)       | Single-Arm Clinical Trial                                            | Single SNP  | Adults with hypertriglyceridemia (n=46)                                          | 8 weeks                                      | <i>FABP2</i> , Ala54Thr (rs1799883)                                                                        | <i>FABP2</i> : 4q26                                                      | 2.0 g/day pure EPA (supplement)                                                                                         | Ala54Ala (GG) vs. Thr54 carriers (GT+TT)                                                                                   | ApoB<br>ApoC-III<br>HDL-c<br>LDL-c<br>TG<br>Total-c          | <b>ApoC-III</b> : In response to EPA supplementation, significantly greater reductions in ApoC-III in GT+TT genotypes of rs1799883 compared to GG genotype.<br><b>HDL-c</b> : In response to EPA supplementation, significantly greater increases in HDL-c in GT+TT genotypes of rs1799883 compared to GG genotype.<br><b>LDL-c</b> : In response to EPA supplementation, LDL-c significantly decreased in GG genotypes of rs1799883 but not GT+TT genotypes.<br><b>TG</b> : In response to EPA supplementation, significantly greater reductions in TG in GT+TT genotypes of rs1799883 compared to GG genotype.                                                                                                                                                      |
| 41                                                 | Pishva et al.                 | Single-Arm                                                           | Single SNP  | Adults with                                                                      | 8 weeks                                      | <i>PPARα</i> ,                                                                                             | <i>PPARα</i> : 22q13.31                                                  | 2.0 g/day pure                                                                                                          | Leu162                                                                                                                     | ApoB                                                         | --                                                                                                                                                                                                                                                                                                                                                                                                                                                                                                                                                                                                                                                                                                                                                                    |

|                            |                                                           |                   |                                                                                       |                            |                                                                                                                                                                                                                                  |                                                                                                                                                           |                                                                  |                                                                                                        |                                                  |                                                                                                                                                                                                                                                                                                                                                                                                                                         |
|----------------------------|-----------------------------------------------------------|-------------------|---------------------------------------------------------------------------------------|----------------------------|----------------------------------------------------------------------------------------------------------------------------------------------------------------------------------------------------------------------------------|-----------------------------------------------------------------------------------------------------------------------------------------------------------|------------------------------------------------------------------|--------------------------------------------------------------------------------------------------------|--------------------------------------------------|-----------------------------------------------------------------------------------------------------------------------------------------------------------------------------------------------------------------------------------------------------------------------------------------------------------------------------------------------------------------------------------------------------------------------------------------|
| 2014 (54)                  | Clinical Trial                                            |                   | hypertriglyceridemia (n=46)                                                           |                            | Leu162Val (rs1800206)<br><i>PPARα</i> ,<br>Intron 7 SNP                                                                                                                                                                          |                                                                                                                                                           | EPA (supplement)                                                 | vs. Val162 carriers<br><br><i>and</i><br><br>Intron 7 GG vs Intron 7 GC                                | ApoCIII<br>HDL-c<br>LDL-c<br>TG<br>Total-c       |                                                                                                                                                                                                                                                                                                                                                                                                                                         |
| Roke and Mutch, 2014 (55)  | Single-Arm Clinical Trial                                 | Single SNP        | Men aged 18-25 years (n=12)                                                           | 12 weeks (+8 week washout) | <i>FADS1</i> , rs174537<br><i>FADS2</i> , rs174576 (LD=1.0 therefore presented results for rs174537)                                                                                                                             | <i>FADS1/2</i> : 11q12.2                                                                                                                                  | Fish oil containing 1.8 g/d EPA+DHA (supplement)                 | Major allele homozygotes vs. Minor allele carriers                                                     | HDL-c<br>LDL-c<br>TG<br>Total-c<br>Total-c:HDL-c | --                                                                                                                                                                                                                                                                                                                                                                                                                                      |
| Rudkowska et al. 2014 (56) | Single-Arm Clinical Trial                                 | Single SNP        | Healthy men and women aged 18-50 (n=210)                                              | 6 weeks                    | <i>SCD1</i> , rs1502593, rs522951, rs11190480, rs3071, rs3829160, rs2234970, rs10883463, rs508384                                                                                                                                | <i>SCD1</i> : 10q24.31                                                                                                                                    | Fish oil containing 1.9-2.2 g/d EPA + 1.1 g/d DHA (supplement)   | Comparison between three genotypes                                                                     | HDL-c<br>LDL-c<br>TG<br>Total-c<br>Total-c:HDL-c | <b>TG:</b> For <i>SCD1</i> rs508384, AA genotype was associated with lower TG than CA and CC genotypes both pre- and post-supplementation.                                                                                                                                                                                                                                                                                              |
| Rudkowska et al. 2014 (57) | Single-Arm Clinical Trial                                 | Nutrigenomic GWAS | Healthy men and women aged 18-50 (n=141) + Replication of GRS in FINGEN study (n=310) | 6 weeks                    | Genetic Risk Score including:<br><i>IQCJ-SCHIP1</i> (4 SNPs),<br><i>SLIT2</i> (3 SNPs),<br><i>PHF17</i> (3 SNPs),<br><i>MYB</i> (1 SNP),<br><i>NXP1</i> (1 SNP),<br><i>NELLI1</i> (1 SNP)<br>[outlined in Supplementary Table 5] | <i>IQCJ-SCHIP1</i> : 3q25.32<br><i>SLIT2</i> : 4p15.31<br><i>PHF17</i> : 4q28.2<br><i>MYB</i> : 6q23.3<br><i>NXP1</i> : 7p21.3<br><i>NELLI1</i> : 11p15.1 | Fish oil containing 1.9-2.2 g/d EPA + 1.1 g/d DHA (supplement)   | Responders versus non-responders (i.e. TG response) to supplementation                                 | TG                                               | Thirteen SNPs were associated with TG response to omega-3 supplementation and 10 were used in the GRS calculation. The GRS was significantly associated with TG response.<br><br><b>TG:</b> The GRS explained 21.5% of the variation in TG response when adjusted for age, sex and BMI. Replication of this GRS in the FINGEN study: the GRS explained 2.0% of the TG change but the association as NS (adjusted for age, sex and BMI). |
| Scorletti et al. 2015 (58) | Randomized, Placebo-Controlled, Double-Blind Intervention | Single SNP        | Men and women with non-alcoholic fatty liver disease (n=95)                           | 15-18 months               | <i>PNPLA3</i> , 1148M (rs738409)<br><i>TM6SF2</i> , E167K (rs58542926)                                                                                                                                                           | <i>PNPLA3</i> : 22q13.31<br><i>TM6SF2</i> : 19p13.11                                                                                                      | 1.8 g/day EPA+ 1.5 g/day DHA (supplement)                        | Comparison between three genotypes<br><i>and</i><br>Major allele homozygotes vs. Minor allele carriers | TG                                               | --                                                                                                                                                                                                                                                                                                                                                                                                                                      |
| Thifault et al. 2013 (59)  | Single-Arm Clinical Trial                                 | Single SNP*       | Healthy men and women with overweight or obesity aged 18-50 (n=210)                   | 6 weeks                    | <i>APOE</i> , rs429358, rs7412                                                                                                                                                                                                   | <i>APOE</i> : 19q13.32                                                                                                                                    | Fish oil containing 1.9-2.2 g/d EPA and 1.1 g/d DHA (supplement) | <i>APOE</i> -E2 vs. <i>APOE</i> -E3 vs. <i>APOE</i> -E4                                                | apoB<br>HDL-c<br>LDL-c<br>TG<br>Total-c          | --                                                                                                                                                                                                                                                                                                                                                                                                                                      |
| Tremblay et                | Single-Arm                                                | Single SNP        | Healthy men                                                                           | 6 weeks                    | <i>PLA2G2A</i> (5)                                                                                                                                                                                                               | <i>PLA2G2A</i> :                                                                                                                                          | Fish oil containing                                              | Major allele                                                                                           | apoB-100                                         | <b>TG:</b> omega-3 supplementation significantly reduced TG in                                                                                                                                                                                                                                                                                                                                                                          |

1  
2

|                                                                      |                                  |                                                                  |                                |                                                                   |                   |                                                                                                                                                                                                                  |                                                                                                                                                                             |                                                                                    |                                                                                                               |                                 |                                                                                                                                                                                                                                                                                                                                                                                                                                                                                                                                                                                                                                                                                                                                                                                                                                                                                                                                                                                                                                                                       |
|----------------------------------------------------------------------|----------------------------------|------------------------------------------------------------------|--------------------------------|-------------------------------------------------------------------|-------------------|------------------------------------------------------------------------------------------------------------------------------------------------------------------------------------------------------------------|-----------------------------------------------------------------------------------------------------------------------------------------------------------------------------|------------------------------------------------------------------------------------|---------------------------------------------------------------------------------------------------------------|---------------------------------|-----------------------------------------------------------------------------------------------------------------------------------------------------------------------------------------------------------------------------------------------------------------------------------------------------------------------------------------------------------------------------------------------------------------------------------------------------------------------------------------------------------------------------------------------------------------------------------------------------------------------------------------------------------------------------------------------------------------------------------------------------------------------------------------------------------------------------------------------------------------------------------------------------------------------------------------------------------------------------------------------------------------------------------------------------------------------|
| 3<br>4<br>5<br>6<br>7<br>8<br>9<br>10<br>11<br>12<br>13              | al. 2015 (60)                    | Clinical Trial                                                   |                                | and women aged 18-50 years (n=208)                                |                   | SNPs),<br><i>PLA2G2C</i> (6 SNPs),<br><i>PLA2G2D</i> (8 SNPs),<br><i>PLA2G2F</i> (6 SNPs),<br><i>PLA2G4A</i> (22 SNPs),<br><i>PLA2G6</i> (5 SNPs),<br><i>PLA2G7</i> (9 SNPs) [outlined in Supplementary Table 5] | 1p36.13<br><i>PLA2G2C</i> : 1p36.13<br><i>PLA2G2D</i> : 1p36.12<br><i>PLA2G2F</i> : 1p36.12<br><i>PLA2G4A</i> : 1q31.1<br><i>PLA2G6</i> : 22q13.1<br><i>PLA2G7</i> : 6p12.3 | 1.9 g/d EPA + 1.1 g/d DHA (supplement)                                             | homozygotes vs. Minor allele carriers or Comparison between three genotypes (depending on allele frequencies) | HDL-c<br>LDL-c<br>TG<br>Total-c | <i>PLA2G7</i> rs1805018 as well as <i>PLA2G4A</i> rs10752979, rs10737277, rs7540602 and rs3820185; in the linear regression model, <i>PLA2G6</i> rs132989, <i>PLA2G7</i> rs679667, <i>PLA2G2D</i> rs12045689, <i>PLA2G4A</i> rs 10752979 and rs1160719 together explained 5.9% of post-supplementation TG levels                                                                                                                                                                                                                                                                                                                                                                                                                                                                                                                                                                                                                                                                                                                                                      |
| 14<br>15<br>16<br>17<br>18<br>19<br>20<br>21<br>22<br>23<br>24<br>25 | Vallée Marcotte et al. 2016 (61) | Single-Arm Clinical Trial                                        | Nutrigenomic GWAS              | Men and woman aged 18-50 years (n=208)                            | 6 weeks           | <i>IQCJ</i> (16 SNPs),<br><i>NXPPI</i> (34 SNPs),<br><i>PHF17</i> (8 SNPs),<br><i>MYB</i> (9 SNPs) [outlined in Supplementary Table 5]                                                                           | <i>IQCJ</i> : 3q25.32<br><i>NXPPI</i> : 7p21.3<br><i>PHF17</i> : 4q28.2<br><i>MYB</i> : 6q23.3                                                                              | Fish oil containing 1.9-2.2 g/d EPA + 1.1 g/d DHA (supplement)                     | Comparison between three genotypes                                                                            | TG                              | <b>TG:</b> Significant gene-diet interaction on TG levels pre- vs. post-supplementation for the following SNPs: <i>IQCJ</i> (10 SNPs: rs2044704, rs1962071, rs6800211, rs17782879, rs1868414, rs2595260, rs9827242, rs1449009, rs2621309, rs61332355), <i>NXPPI</i> (4 SNPs: rs7806226, rs7805772, rs2349780, rs6974252), <i>MYB</i> (3 SNPs: rs9321493, rs11154794, rs210962). Four SNPs were still significant after applying the false discovery rate to account for multiple testing: rs1449009, rs2621309, rs61332355 in <i>IQCJ</i> ; rs7805772 in <i>NXPPI</i> . There were four dominant SNPs driving the association with the TG response: rs61332355 and rs9827242 in <i>IQCJ</i> , rs7805772 in <i>NXPPI</i> and rs11154794 in <i>MYB</i> . Significant differences in genotype frequencies between positive and negative responders to omega-3 for TG changes for <i>IQCJ</i> rs2044704, rs1962071, rs17782879, rs1868414, rs2595260, rs9827242, rs1449009, rs2621309, rs61332355, <i>NXPPI</i> rs7806226, rs7805772, <i>MYB</i> rs11154794 and rs210936. |
| 26<br>27<br>28<br>29<br>30<br>31<br>32                               | Vallée Marcotte et al. 2019 (62) | Single-Arm Clinical Trial (replication of GRS in a novel cohort) | Nutrigenomic GWAS              | Healthy adults of Mexican descent aged 18-40 years (n=191)        | 6 weeks           | Genetic Risk Score including 103 SNPs: [outlined in Supplementary Table 5]                                                                                                                                       | NA                                                                                                                                                                          | Fish oil containing 1.9 g/day EPA + 0.8 g/day DHA (supplement)                     | Responders versus non-responders (i.e. TG response) to supplementation                                        | TG                              | <b>TG:</b> A first 7-SNP GRS [SNPs selected based on previously developed GRS (57.61)] did not explain TG variation. A second GRS calculated from 103 SNPs significantly explained 4.4% of TG variation. A third GRS including the 5 most relevant SNPs significantly explained 11.0% of TG variation ( <i>NXPPI</i> rs10265408, rs10486228, rs10486228, rs17150341, rs6974252 and <i>IQCJ-SCHIP1</i> rs2595241). When subjects with the lowest TG change were not included, this third GRS explained more TG variation. Including only the 28 responders and 28 non-responders with the greatest TG variation, this third GRS explained 29.1% of TG variation.                                                                                                                                                                                                                                                                                                                                                                                                       |
| 33<br>34<br>35<br>36<br>37                                           | Vallée Marcotte et al. 2019 (63) | Single-Arm Clinical Trial                                        | Nutrigenomics GWAS (polygenic) | Men and woman aged 18-50 years with overweight or obesity (n=208) | 6 weeks           | GWAS; GRS included 31 SNPs [outlined in Supplementary Table 5]                                                                                                                                                   | NA                                                                                                                                                                          | Fish oil containing 1.9-2.2g/d EPA + 1.1g/d DHA (supplement)                       | Responders to omega-3 supplementation for TG reduction vs. Non-Responders                                     | TG                              | <b>TG:</b> 31 SNPs associated with TG response to omega-3 supplementation and used in GRS calculation; Lower GRSs were significantly more responsive to omega-3 supplementation for TG reduction compared to higher GRS (GRS accounted for 49.7% of TG responses); These findings were replicated in the FINGEN study with 23 SNPs (GRS accounted for 3.7% of TG responses).                                                                                                                                                                                                                                                                                                                                                                                                                                                                                                                                                                                                                                                                                          |
| 38<br>39<br>40<br>41                                                 | Vallée Marcotte et al. 2020 (64) | Double-Blind, Randomized, Controlled, Crossover Intervention     | Nutrigenomics GWAS (polygenic) | Men and women with abdominal obesity and elevated CRP aged 18-70  | 10 weeks per diet | GRS included 30 SNPs [outlined in Supplementary Table 5]                                                                                                                                                         | NA                                                                                                                                                                          | Control oil: 3 g/d corn oil<br>Pure EPA: 2.7 g/d<br>Pure DHA: 2.7 g/d (supplement) | Responders to different types of omega-3 supplementation for TG reduction vs.                                 | TG                              | <b>TG:</b> The GRS was significantly associated with responsiveness to EPA for TG reduction when comparing responders vs. non-responders vs. adverse responders (trend, p=0.08, for DHA). The GRS was significantly associated with responsiveness to both EPA and DHA for TG reduction when comparing responders vs. adverse responders.                                                                                                                                                                                                                                                                                                                                                                                                                                                                                                                                                                                                                                                                                                                             |

42  
43  
44  
45  
46  
47

1  
2

|                                              |                           |                                                                                      |                             |                                                                                                                                          |          |                                                                                          |                                                                         |                                                                                                              |                                                                                                                                       |                                                  |                                                                                                                                                                                                                                                                                                                                                                                                                                                                                                                                                                                                                                                                                                  |
|----------------------------------------------|---------------------------|--------------------------------------------------------------------------------------|-----------------------------|------------------------------------------------------------------------------------------------------------------------------------------|----------|------------------------------------------------------------------------------------------|-------------------------------------------------------------------------|--------------------------------------------------------------------------------------------------------------|---------------------------------------------------------------------------------------------------------------------------------------|--------------------------------------------------|--------------------------------------------------------------------------------------------------------------------------------------------------------------------------------------------------------------------------------------------------------------------------------------------------------------------------------------------------------------------------------------------------------------------------------------------------------------------------------------------------------------------------------------------------------------------------------------------------------------------------------------------------------------------------------------------------|
|                                              |                           |                                                                                      | years (n=122)               |                                                                                                                                          |          |                                                                                          |                                                                         | Non-Responders<br>vs.<br>Adverse Responders<br><i>and</i><br>Responders<br>vs.<br>Adverse Responders         |                                                                                                                                       |                                                  |                                                                                                                                                                                                                                                                                                                                                                                                                                                                                                                                                                                                                                                                                                  |
| 3<br>4<br>5<br>6<br>7<br>8<br>9<br>10<br>11  | Wu et al. 2014<br>(65)    | Double-Blind,<br>Randomized,<br>Placebo-<br>Controlled,<br>Crossover<br>Intervention | Single SNP                  | Men and<br>women with<br>moderate risk<br>of CVD (n=84)                                                                                  | 8 weeks  | <i>eNOS</i><br>Glu298Asp<br>(rs1799983)                                                  | <i>NOS3</i> : 7q36.1                                                    | Fish oil containing<br>0.9 g/day EPA +<br>0.6 g/day DHA<br>(supplement)                                      | Major allele<br>homozygotes (GG)<br>vs.<br>Minor allele carriers<br>(GT+TT)                                                           | LDL-c<br>HDL-c<br>TG<br>Total-c                  | --                                                                                                                                                                                                                                                                                                                                                                                                                                                                                                                                                                                                                                                                                               |
| 12<br>13<br>14<br>15<br>16<br>17<br>18<br>19 | Zheng et al.<br>2018 (66) | Double-Blind,<br>Randomized,<br>Controlled<br>Intervention                           | Single SNP and<br>Polygenic | Men and<br>women with<br>type 2 diabetes<br>aged 35-80<br>years for men<br>or<br>postmenopausa<br>l and 80 years<br>for women<br>(n=139) | 25 weeks | <i>CD36</i> ,<br>rs1527483<br><i>NOS3</i> ,<br>rs1799983<br><i>PPARγ2</i> ,<br>rs1801282 | <i>CD36</i> : 7q21.11<br><i>NOS3</i> : 7q36.1<br><i>PPARγ2</i> : 3p25.2 | Fish oil: 2.0 g/d<br>EPA and DHA<br>Flaxseed oil: 2.5<br>g/d ALA<br>Control oil: corn<br>oil<br>(supplement) | Major allele<br>homozygotes<br>vs.<br>Minor allele carriers<br>and<br>High vs. low genetic<br>score calculated<br>based on three SNPs | HDL-c<br>LDL-c<br>TG<br>Total-c:HDL-c<br>Total-c | <b>LDL-c</b> : significant interaction for <i>PPARγ2</i> rs1801282<br>genotype, intervention group and LDL-c change; but increased<br>LDL-c in G allele carriers of <i>PPARγ2</i> rs1801282 compared to<br>CC genotype <i>only in the control</i> (corn oil) group<br><b>TG</b> : omega-3 fish oil (but not flaxseed oil) supplementation<br>reduced TG for individuals with the <i>CD36</i> rs1527483 GG<br>genotype (significant interaction); significant interaction<br>between genetic score and omega-3 on TG levels whereby<br>omega-3 (fish oil and flaxseed oil) supplementation<br>significantly reduced TG levels compared to control only in<br>individuals with high genetic scores |

20

21

22

23

24

25

26

27

28

29

30

31

32

33

34

35

36

37

38

39

40

41

42

43

44

45

46

47

ALA: alpha-linolenic acid, Apo: apolipoprotein, DHA: docosahexaenoic acid, EPA: eicosapentaenoic acid, HDL: high-density lipoprotein cholesterol, LDL: low-density lipoprotein cholesterol, omega-3: omega-3, N/A: not applicable, NS: Non-significant, sdLDL-c: small, dense, low-density lipoprotein cholesterol, SNP: single nucleotide polymorphism, TG: triglycerides

1. All other (not listed) gene/omega-3/lipid/lipoprotein results of interest to the present review were NS

Participants are described as "healthy" for studies that incorporated exclusion criteria for certain conditions, blood lipid levels, etc. and when studies described the population as "healthy."

'--' indicates that all the completed gene/omega-3/lipid/lipoprotein analyses were NS

\*Human *APOE* is polymorphic at two single nucleotides (rs429358 and rs7412) resulting in three different alleles ( $\epsilon$  2,  $\epsilon$  3 and  $\epsilon$  4)



**Supplementary Table 4: Genes, SNPs, lipid/lipoprotein outcomes and studies included in evidence grading process and guideline development**

| Gene, SNP(s)                              | Outcome | Studies                                                                                                                                                                                                                                                              |
|-------------------------------------------|---------|----------------------------------------------------------------------------------------------------------------------------------------------------------------------------------------------------------------------------------------------------------------------|
| <i>APOE</i> : rs429358, rs7412 (Genotype) | TG      | AbuMweis et al. 2018 (24)<br>Carvalho-Wells et al. 2012 (32)<br>Caslake et al. 2008 (34)<br>Dang et al. 2015 (36)<br>Jackson et al. 2012 (41)<br>Olano-Martin et al. 2010 (49)<br>Minihane et al. 2000 (48)<br>Paschos et al. 2005 (52)<br>Thifault et al. 2013 (59) |
| <i>APOE</i> : rs429358, rs7412            | Total-c | Fallaize et al. 2016 (7)<br>AbuMweis et al. 2018 (24)<br>Carvalho-Wells et al. 2012 (32)<br>Caslake et al. 2008 (34)<br>Dang et al. 2015 (36)<br>Jackson et al. 2012 (41)<br>Olano-Martin et al. 2010 (49)<br>Paschos et al. 2005 (52)<br>Thifault et al. 2013 (59)  |
| <i>PPAR</i> $\gamma$ 2: rs1801282         | LDL-c   | Binia et al. 2017 (27)<br>Harsløf et al. 2014 (39)<br>Itariu et al. 2012 (40)<br>Lindi et al. 2003 (43)<br>Zheng et al. 2018 (66)                                                                                                                                    |
| <i>PPAR</i> $\gamma$ 2: rs1801282         | Total-c | Binia et al. 2017 (27)<br>Harsløf et al. 2014 (39)<br>Itariu et al. 2012 (40)<br>Lindi et al. 2003 (43)<br>Zheng et al. 2018 (66)                                                                                                                                    |
| <i>PPAR</i> $\gamma$ 2: rs1801282         | TG      | Binia et al. 2017 (27)<br>Harsløf et al. 2014 (39)<br>Itariu et al. 2012 (40)<br>Lindi et al. 2003 (43)<br>Zheng et al. 2018 (66)                                                                                                                                    |
| <i>CD36</i> : rs1761667                   | HDL-c   | Dawczynski et al. 2013 (37)<br>Madden et al. 2008 (45)                                                                                                                                                                                                               |
| <i>CD36</i> : rs1761667                   | TG      | Dawczynski et al. 2013 (37)<br>Madden et al. 2008 (45)                                                                                                                                                                                                               |
| <i>CD36</i> : rs1049673                   | HDL-c   | Dawczynski et al. 2013 (37)<br>Madden et al. 2008 (45)                                                                                                                                                                                                               |
| <i>CD36</i> : rs1527483                   | TG      | Madden et al. 2008 (45)<br>Zheng et al. 2018 (66)                                                                                                                                                                                                                    |
| <i>FADS</i> : rs174547*                   | Total-c | Dumont et al. 2011 (5)<br>Dumont et al. 2018 (6)<br>Lu et al. 2010 (17)<br>Standl et al. 2012 (20)<br>Alsaleh et al. 2014 (25)<br>AbuMweis et al. 2018 (24)<br>Roke et al. 2014 (55)                                                                                 |
| 31-SNP Genetic Risk Score                 | TG      | Vallée Marcotte et al. 2019 (67)<br>Vallée Marcotte et al. 2020 (64)                                                                                                                                                                                                 |

**Supplementary Table 5: Additional list of gene(s) and SNP(s) tested in studies**

| Study                                                            | Gene(s), SNP(s)                                                                                                                                                                                                                                                                                                                                                                                                                                                                                                                                                              |
|------------------------------------------------------------------|------------------------------------------------------------------------------------------------------------------------------------------------------------------------------------------------------------------------------------------------------------------------------------------------------------------------------------------------------------------------------------------------------------------------------------------------------------------------------------------------------------------------------------------------------------------------------|
| Chen et al. <i>Int J Obes</i> ;43:808-820 (2019)                 | <p><i>FADS2</i>, rs174599, rs174601, rs556656, rs11501631, rs74771917, rs3168072, rs182008711, rs73487492, rs174602, rs12577276</p> <p><i>FADS3</i>, rs191972868, rs115905177, rs174635, rs174634, rs174454, rs12292968, rs174570, rs7930349, rs116672159, rs116139751, rs7942717, rs7115739, rs174450, rs74626285</p> <p><i>RAB31L1</i>, rs741887, rs2521561, rs2727258, rs2524288, rs117518711, rs74957100, rs77071864, rs78243280, rs741888, rs2524287, rs12420625, rs77229376, rs187943834, rs78156005, rs190738753, rs11230827, rs76133863, rs116985542, rs73491252</p> |
| Cormier et al. 2012                                              | <p><i>FADS</i> gene cluster rs174456, rs174627, rs482548, rs2072114, rs12807005, rs174448, rs2845573, rs7394871, rs7942717, rs74823126, rs174602, rs498793, rs7935946, rs174546, rs174570, rs174579, rs174611, rs174616, rs968567</p>                                                                                                                                                                                                                                                                                                                                        |
| Vallée Marcotte et al. <i>Am J Clin Nutr</i> ;109:176–185 (2019) | <p><i>IQCJ-SCHIP1</i>, rs7639707, rs62270407</p> <p><i>NXPH1</i>, rs61569932, rs1990554, rs6463808, rs6966968, rs28473103, rs28673635, rs12702829, rs78943417, rs293180, rs1837523</p> <p><i>PHF17</i>, rs1216346, rs114348423, rs75007521</p> <p><i>MYB</i>, rs72560788, rs72974149, rs210962, rs6933462</p> <p><i>NELL1</i>, rs79624996, rs1850875, rs78786240, rs117114492</p> <p><i>SLIT2</i>, rs184945470, rs143662727, rs10009109, rs10009535, rs61790364, rs73241936, rs16869663, rs76015249</p>                                                                      |
| Tremblay et al. <i>Lipids in Health and Disease</i> (2015) 14:12 | <p><i>PLA2G2A</i>, rs876018, rs955587, rs3753827, rs11573156, rs11573142</p> <p><i>PLA2G2C</i>, rs6426616, rs12139100, rs10916716, rs2301475, rs10916712, rs10916718</p> <p><i>PLA2G2D</i>, rs578459, rs16823482, rs3736979, rs584367, rs12045689, rs679667, rs17354769, rs1091671</p> <p><i>PLA2G2F</i>, rs12065685, rs6657574, rs11582551, rs818571, rs631134, rs11583904</p>                                                                                                                                                                                              |

|                                                                     |                                                                                                                                                                                                                                                                                                                                                                                                                                                                                                                                                                                                                                                        |
|---------------------------------------------------------------------|--------------------------------------------------------------------------------------------------------------------------------------------------------------------------------------------------------------------------------------------------------------------------------------------------------------------------------------------------------------------------------------------------------------------------------------------------------------------------------------------------------------------------------------------------------------------------------------------------------------------------------------------------------|
|                                                                     | <p><i>PLA2G4A</i>, rs979924, rs2076075, rs3736741, rs10911949, rs10752979, rs1160719, rs10737277, rs12720702, rs7522213, rs7540602, rs10157410, rs12720497, rs4651331, rs1569480, rs10911935, rs12353944, rs11576330, rs10489410, rs10911946, rs3820185, rs12746200, rs11587539</p> <p><i>PLA2G6</i>, rs5750546, rs132989, rs133016, rs2235346, rs2284060</p> <p><i>PLA2G7</i>, rs12195701, rs12528807, rs1421368, rs1421378, rs17288905, rs1805017, rs1805018, rs6929105, rs7756935</p>                                                                                                                                                               |
| <p>Ouellette et al. J Nutrigenet Nutrigenomics;6:268–280 (2013)</p> | <p><i>GPAM</i>, rs17129561, rs10787428, rs2792751</p> <p><i>AGPAT3</i>, rs999519, rs2838440, rs2838445, rs2838458, rs4818873, rs9978441, rs9982600, rs11700575, rs17004619, rs2838452, rs2838456, rs3788086, rs2838429</p> <p><i>AGPAT4</i>, rs746731, rs747866, rs1125640, rs2277092, rs2293286, rs3757025, rs3798225, rs3798920, rs3798924, rs3798929, rs3798943, rs3798945, rs3822853, rs3823058, rs4709501, rs6906489, rs6923835, rs7750302, rs7769321, rs9458172, rs10945713, rs10945719, rs11965825, rs12202278, rs17627837, rs12524665, rs1001422, rs6455711, rs9456642, rs2064721, rs3778227, rs3798922, rs11967514, rs7768457, rs12662114</p> |
| <p>Ouellette et al. Lipids in Health and Disease, 13:86 (2014)</p>  | <p><i>MGLL</i>, rs782440, rs16826716, rs6776142, rs9877819, rs555183, rs6780384, rs13076593, rs605188, rs6765071, rs782444, rs549662, rs3773155, rs541855, rs6439081, rs6439082, rs6787155, rs1466571, rs893294</p>                                                                                                                                                                                                                                                                                                                                                                                                                                    |
| <p>Bouchard-Mercier et al. Genes Nutr 9:395 (2014)</p>              | <p><i>GCK</i>, rs2268573, rs2908297, rs2971676, rs758989, rs12673242, rs2908290, rs2284777, rs2300584, rs1990458, rs741038, rs1799884, rs2908277, rs3757838</p>                                                                                                                                                                                                                                                                                                                                                                                                                                                                                        |
| <p>Bouchard-Mercier et al. Nutrients, 6, 1145-1163 (2014)</p>       | <p><i>RXRA</i>, rs10881576, rs7871655, rs12339187, rs11185660, rs11103473, rs10776909, rs12004589, rs3132301, rs1805352, rs3132294, rs1805343, rs1045570</p> <p><i>CPT1A</i>, rs3019598, rs897048, rs7942147, rs4930248, rs11228364, rs11228368, rs10896371, rs1017640, rs613084</p> <p><i>ACADVL</i>, rs2017365</p> <p><i>ACAA2</i>, rs529556, rs10502901, rs631536, rs1942421, rs2276168, rs7237253</p> <p><i>ABCD2</i>, rs4072006, rs10877201, rs12582802, rs4294600, rs11172696, rs10877173, rs7133376, rs7968837</p> <p><i>ACOX1</i>, rs10852766, rs3744033, rs12430, rs8065144,</p>                                                              |

|                                                                  |                                                                                                                                                                                                                                                                                                                                                                                                                                                                                                                                                                               |
|------------------------------------------------------------------|-------------------------------------------------------------------------------------------------------------------------------------------------------------------------------------------------------------------------------------------------------------------------------------------------------------------------------------------------------------------------------------------------------------------------------------------------------------------------------------------------------------------------------------------------------------------------------|
|                                                                  | rs11651351, rs3643, rs7213998, rs17583163<br><i>ACAA1</i> , rs2239621, rs156265, rs5875                                                                                                                                                                                                                                                                                                                                                                                                                                                                                       |
| AlSaleh et al. Genes Nutr 9:412 (2014)                           | <i>CETP</i> , rs3764261, rs247616, rs7205804<br><i>LIPC</i> , rs1532085<br><i>APOB</i> , rs1367117<br><i>ABCG5</i> , <i>ABCG8</i> , rs4299376<br><i>TIMD4</i> , <i>HAVCR1</i> , rs6882076, rs1501908, rs1553318<br>GCKR, rs1260326, rs780094<br>TRIB1, rs2954022, rs10808546, rs2954029<br><i>ANGPTL3</i> , <i>DOCK7</i> , rs3850634, rs1167998, rs2131925<br><i>FADS1</i> , <i>FADS2</i> , <i>FADS3</i> , rs174550, rs174547, rs174546, rs174583<br><i>GALNT2</i> , rs4846914, rs1321257<br><i>ABCA1</i> , rs4149268<br><i>APOE</i> , <i>APOC1</i> , <i>APOC2</i> , rs439401 |
| Vallée Marcotte et al. Genes & Nutrition 15:10 (2020)            | <i>IQCJ-SCHIP1</i> , rs7639707, rs62270407<br>NXP1, rs61569932, rs1990554, rs6463808, rs6966968, rs28473103, rs28673635, rs12702829, rs78943417, rs293180, rs1837523<br><i>PHF17</i> , rs1216346, rs114348423, rs75007521<br><i>MYB</i> , rs72560788, rs72974149, rs210962, rs6933462<br><i>NELL1</i> , rs79624996, rs1850875, rs78786240, rs117114492<br><i>SLIT2</i> , rs184945470, rs143662727, rs10009109, rs10009535, rs61790364, rs73241936, rs16869663, rs76015249                                                                                                     |
| Rudkowska et al. Journal of Lipid Research 55 (2014)             | <i>IQCJ-SCHIP1</i> , <i>MYB</i> , <i>NELL1</i> , <i>NXP1</i> , <i>PHF17</i> , <i>SLIT2</i> , rs2621308, rs1449009, rs61332355, rs2621309, rs2952724, rs2629715, rs1216352, rs1216365, rs931681, rs6920829, rs6463808, rs752088                                                                                                                                                                                                                                                                                                                                                |
| Vallée Marcotte et al. J Nutrigenet Nutrigenomics;9 :1-11 (2016) | <i>IQCJ</i> , rs12497650, rs4501157, rs13091349, rs2044704, rs1062071, rs7634829, rs2621294, rs6800211, rs17782879, rs1868414, rs2595260, rs6763890, rs9827242, rs1449009, rs2621309, rs61332355                                                                                                                                                                                                                                                                                                                                                                              |

|                                                         |                                                                                                                                                                                                                                                                                                                                                                                                                                                                                                                                                                                                                                                                                                                                                                                                                                                                                                                                                                                                                                                                                                                                                                                            |
|---------------------------------------------------------|--------------------------------------------------------------------------------------------------------------------------------------------------------------------------------------------------------------------------------------------------------------------------------------------------------------------------------------------------------------------------------------------------------------------------------------------------------------------------------------------------------------------------------------------------------------------------------------------------------------------------------------------------------------------------------------------------------------------------------------------------------------------------------------------------------------------------------------------------------------------------------------------------------------------------------------------------------------------------------------------------------------------------------------------------------------------------------------------------------------------------------------------------------------------------------------------|
|                                                         | <p><i>NXPFI</i>, rs6956210, rs2107779, rs10273195, rs12216689, rs6963644, rs17150341, rs1013868, rs12537067, rs4318981, rs17153997, rs7801099, rs4725120, rs1859275, rs10238726, rs1012960, rs11767429, rs4333500, rs7793115, rs7799856, rs7806226, rs13221144, rs17406479, rs10486228, rs17154569, rs4141002, rs7805772, rs2349780, rs2107474, rs11769942, rs6952383, rs6974252, rs10265408, rs2189904, rs2057862</p> <p><i>PHF17</i>, rs2217023, rs4975270, rs11722830, rs12505447, rs6534704, rs13148510, rs13143771, rs13142964</p> <p><i>MYB</i>, rs9321493, rs11154794, rs210798, rs210936, rs7757388, rs210962, rs17639758, rs1013891, rs2179308</p>                                                                                                                                                                                                                                                                                                                                                                                                                                                                                                                                |
| <p>Vallée Marcotte et al. Nutrients; 11, 737 (2019)</p> | <p><i>IQCJ-SCHIP1</i>, rs12497650, rs4501157, rs13091349, rs2044704, rs1962071, rs7634829, rs2621294, rs6800211, rs17782879, rs1868414, rs2595260, rs6763890, rs1449009, rs61332355, rs12485627, rs2595242, rs7639937, rs9820807, rs1375409, rs1967363, rs9824310, rs11915303, rs9835214, rs11921343, rs13066560, rs1675497, rs9839862, rs16829875, rs17795566, rs9860588, rs16830408, rs17798579, rs2364930, rs9865997, rs2595241, rs7632574, rs2621308</p> <p><i>NXPFI</i>, rs6956210, rs2107779, rs10273195, rs12216689, rs6963644, rs17150341, rs1013868, rs4318981, rs17153997, rs7801099, rs4725120, rs10238726, rs1012960, rs11767429, rs4333500, rs7793115, rs7799856, rs7806226, rs13221144, rs17406479, rs10486228, rs17154569, rs4141002, rs7805772, rs2349780, rs2107474, rs11769942, rs6952383, rs6974252, rs10265408, rs2189904, rs2057862, rs6463808</p> <p><i>PHF17</i>, rs2217023, rs4975270, rs11722830, rs12505447, rs6534704, rs13148510, rs13143771, rs13142964, rs1216352, rs1216365</p> <p><i>MYB</i>, rs9321493, rs11154794, rs210798, rs210936, rs7757388, rs17639758, rs1013891, rs2179308, rs6920829, <i>SLIT2</i>, rs2952724</p> <p><i>NELLI</i>, rs752088</p> |

Supplementary Table 6: 31-SNP Nutri-GRS

| <b>Gene, rs Number</b>          | <b>Alleles<sup>1</sup></b> | <b>Associated Points</b> |
|---------------------------------|----------------------------|--------------------------|
| <i>IQCJ-SCHIP1</i> , rs7639707  | <u>A</u> /G                | +1                       |
| <i>IQCJ-SCHIP1</i> , rs62270407 | C/ <u>T</u>                | -1                       |
| NXPH1, rs61569932,              | <u>G</u> /T                | +1                       |
| NXPH1, rs1990554                | <u>A</u> /C                | +1                       |
| NXPH1, rs6463808                | <u>A</u> /G                | +1                       |
| NXPH1, rs6966968                | <u>A</u> /G                | +1                       |
| NXPH1, rs28473103               | <u>A</u> /G                | -1                       |
| NXPH1, rs28673635               | <u>A</u> /G                | +1                       |
| NXPH1, rs12702829               | <u>C</u> /T                | +1                       |
| NXPH1, rs78943417               | A/ <u>T</u>                | -1                       |
| NXPH1, rs293180                 | G/ <u>T</u>                | +1                       |
| NXPH1, rs1837523                | <u>C</u> /T                | -1                       |
| <i>PHF17</i> , rs1216346        | <u>C</u> /T                | +1                       |
| <i>PHF17</i> , rs114348423      | <u>A</u> /G                | +1                       |
| <i>PHF17</i> , rs75007521       | <u>G</u> /T                | -1                       |
| <i>MYB</i> , rs72560788         | <u>C</u> /T                | -1                       |
| <i>MYB</i> , rs72974149         | <u>A</u> /G                | -1                       |
| <i>MYB</i> , rs210962           | <u>C</u> /T                | -1                       |
| <i>MYB</i> , rs6933462          | <u>C</u> /G                | +1                       |
| <i>NELL1</i> , rs79624996       | <u>A</u> /G                | +1                       |
| <i>NELL1</i> , rs1850875        | <u>C</u> /T                | +1                       |
| <i>NELL1</i> , rs78786240       | <u>C</u> /T                | -1                       |
| <i>NELL1</i> , rs117114492      | <u>G</u> /T                | +1                       |
| <i>SLIT2</i> , rs184945470      | <u>C</u> /T                | +1                       |
| <i>SLIT2</i> , rs143662727      | <u>A</u> /G                | -1                       |
| <i>SLIT2</i> , rs10009109       | <u>C</u> /T                | +1                       |
| <i>SLIT2</i> , rs10009535       | <u>A</u> /G                | +1                       |
| <i>SLIT2</i> , rs61790364       | <u>A</u> /G                | +1                       |
| <i>SLIT2</i> , rs73241936       | <u>C</u> /T                | +1                       |
| <i>SLIT2</i> , rs16869663       | <u>A</u> /G                | +1                       |
| <i>SLIT2</i> , rs76015249       | <u>A</u> /G                | +1                       |

1. Minor alleles are underlined

For individuals carrying one or two minor alleles, provide the associated number of points (either +1 or -1). For individuals homozygous for the major allele, provide 0 points. Count the overall number of points. Individuals with lower nutri-GRS are more likely to respond to approximately 3.0 g/day EPA+DHA for TG lowering.

## References

1. Bouchard-Mercier A, Godin G, Lamarche B, Pérusse L, Vohl M-C. Effects of Peroxisome Proliferator-Activated Receptors, Dietary Fat Intakes and Gene–Diet Interactions on Peak Particle Diameters of Low-Density Lipoproteins. *J Nutrigenet Nutrigenomics*. 2011;4(1):36–48.
2. Bodhini D, Gaal S, Shatwan I, Ramya K, Ellahi B, Surendran S, et al. Interaction between TCF7L2 polymorphism and dietary fat intake on high density lipoprotein cholesterol. Li S, editor. *PLoS ONE*. 2017 Nov 28;12(11):e0188382.
3. Chen Y, Estampador AC, Keller M, Poveda A, Dalla-Riva J, Johansson I, et al. The combined effects of FADS gene variation and dietary fats in obesity-related traits in a population from the far north of Sweden: the GLACIER Study. *International Journal of Obesity*. 2019 Apr;43(4):808–20.
4. Ching YK, Chin YS, Appukutty M, Ramanchadran V, Yu CY, Ang GY, et al. Interaction of Dietary Linoleic Acid and  $\alpha$ -Linolenic Acids with rs174547 in FADS1 Gene on Metabolic Syndrome Components among Vegetarians. *Nutrients*. 2019 Jul;11(7):1686.
5. Dumont J, Huybrechts I, Spinneker A, Gottrand F, Grammatikaki E, Bevilacqua N, et al. FADS1 genetic variability interacts with dietary  $\alpha$ -linolenic acid intake to affect serum non-HDL-cholesterol concentrations in European adolescents. *J Nutr*. 2011 Jul;141(7):1247–53.
6. Dumont J, Goumidi L, Grenier-Boley B, Cottel D, Marécaux N, Montaye M, et al. Dietary linoleic acid interacts with FADS1 genetic variability to modulate HDL-cholesterol and obesity-related traits. *Clinical Nutrition*. 2018 Oct 1;37(5):1683–9.
7. Fallaize R, Celis-Morales C, Macready AL, Marsaux CF, Forster H, O'Donovan C, et al. The effect of the apolipoprotein E genotype on response to personalized dietary advice intervention: findings from the Food4Me randomized controlled trial. *Am J Clin Nutr*. 2016 Sep;104(3):827–36.
8. Fontaine-Bisson B, El-Sohemy A. Genetic polymorphisms of tumor necrosis factor- $\alpha$  modify the association between dietary polyunsaturated fatty acids and plasma high-density lipoprotein-cholesterol concentrations in a population of young adults. *J Nutrigenet Nutrigenomics*. 2008;1(5):215–23.
9. Fontaine-Bisson B, Wolever TMS, Connelly PW, Corey PN, El-Sohemy A. NF- $\kappa$ B  $-94$ Ins/Del ATTG polymorphism modifies the association between dietary polyunsaturated fatty acids and HDL-cholesterol in two distinct populations. *Atherosclerosis*. 2009 Jun;204(2):465–70.
10. Hellstrand S, Sonestedt E, Ericson U, Gullberg B, Wirfält E, Hedblad B, et al. Intake levels of dietary long-chain PUFAs modify the association between genetic variation in FADS and LDL-C. *J Lipid Res*. 2012 Jun;53(6):1183–9.
11. Hosseini-Esfahani F, Mirmiran P, Koochakpoor G, Daneshpour MS, Guity K, Azizi F. Some dietary factors can modulate the effect of the zinc transporters 8 polymorphism on the risk of metabolic syndrome. *Sci Rep*. 2017 Dec;7(1):1649.

12. Jang HB, Hwang J-Y, Park JE, Oh JH, Ahn Y, Kang J-H, et al. Intake levels of dietary polyunsaturated fatty acids modify the association between the genetic variation in *PCSK5* and HDL cholesterol. *J Med Genet*. 2014 Dec;51(12):782–8.
13. Joffe YT, van der Merwe L, Carstens M, Collins M, Jennings C, Levitt NS, et al. Tumor Necrosis Factor- $\alpha$  Gene -308 G/A Polymorphism Modulates the Relationship between Dietary Fat Intake, Serum Lipids, and Obesity Risk in Black South African Women. *The Journal of Nutrition*. 2010 May 1;140(5):901–7.
14. Joffe YT, van der Merwe L, Evans J, Collins M, Lambert EV, September A, et al. The tumor necrosis factor- $\alpha$  gene -238 G>A polymorphism, dietary fat intake, obesity risk and serum lipid concentrations in black and white South African women. *Eur J Clin Nutr*. 2012 Dec;66(12):1295–302.
15. Joffe YT, van der Merwe L, Evans J, Collins M, Lambert EV, September A, et al. Interleukin-6 Gene Polymorphisms, Dietary Fat Intake, Obesity and Serum Lipid Concentrations in Black and White South African Women. *Nutrients*. 2014 Jun 24;6(6):2436–65.
16. Lai Chao-Qiang, Corella Dolores, Demissie Serkalem, Cupples L. Adrienne, Adiconis Xian, Zhu Yueping, et al. Dietary Intake of n-6 Fatty Acids Modulates Effect of Apolipoprotein A5 Gene on Plasma Fasting Triglycerides, Remnant Lipoprotein Concentrations, and Lipoprotein Particle Size. *Circulation*. 2006 May 2;113(17):2062–70.
17. Lu Y, Feskens EJ, Dollé ME, Imholz S, Verschuren WM, Müller M, et al. Dietary n-3 and n-6 polyunsaturated fatty acid intake interacts with *FADS1* genetic variation to affect total and HDL-cholesterol concentrations in the Doetinchem Cohort Study. *The American Journal of Clinical Nutrition*. 2010 Jul 1;92(1):258–65.
18. Nettleton JA, Volcik KA, Hoogeveen RC, Boerwinkle E. Carbohydrate intake modifies associations between *ANGPTL4*[E40K] genotype and HDL-cholesterol concentrations in White men from the Atherosclerosis Risk in Communities (ARIC) study. *Atherosclerosis*. 2009 Mar;203(1):214–20.
19. Richardson K, Louie-Gao Q, Arnett DK, Parnell LD, Lai C-Q, Davalos A, et al. The *PLIN4* Variant rs8887 Modulates Obesity Related Phenotypes in Humans through Creation of a Novel miR-522 Seed Site. *PLOS ONE*. 2011 Apr 20;6(4):e17944.
20. Standl M, Lattka E, Stach B, Koletzko S, Bauer C-P, von Berg A, et al. *FADS1* *FADS2* Gene Cluster, PUFA Intake and Blood Lipids in Children: Results from the GINIplus and LISAPLUS Studies. *PLoS One* [Internet]. 2012 May 21 [cited 2020 Aug 3];7(5). Available from: <https://www.ncbi.nlm.nih.gov/pmc/articles/PMC3357401/>
21. Tai ES, Corella D, Demissie S, Cupples LA, Coltell O, Schaefer EJ, et al. Polyunsaturated Fatty Acids Interact with the *PPARA*-L162V Polymorphism to Affect Plasma Triglyceride and Apolipoprotein C-III Concentrations in the Framingham Heart Study. *J Nutr*. 2005 Mar 1;135(3):397–403.
22. Volcik KA, Nettleton JA, Ballantyne CM, Boerwinkle E. Peroxisome proliferator-activated receptor alpha genetic variation interacts with n-6 and long-chain n-3 fatty acid intake to affect total cholesterol and LDL-cholesterol concentrations in the Atherosclerosis Risk in Communities Study. *Am J Clin Nutr*. 2008;87:1926–31.



- 1  
2  
3 23. Warodomwichit D, Arnett DK, Kabagambe EK, Tsai MY, Hixson JE, Straka RJ, et al. Polyunsaturated  
4 Fatty Acids Modulate the Effect of TCF7L2 Gene Variants on Postprandial Lipemia. *The Journal of*  
5 *Nutrition*. 2009 Mar 1;139(3):439–46.  
6
- 7  
8 24. AbuMweis SS, Panchal SK, Jones PJH. Triacylglycerol-Lowering Effect of Docosahexaenoic Acid Is Not  
9 Influenced by Single-Nucleotide Polymorphisms Involved in Lipid Metabolism in Humans. *Lipids*.  
10 2018;53(9):897–908.  
11
- 12 25. AlSaleh A, Maniou Z, Lewis FJ, Hall WL, Sanders TAB, O'Dell SD. Genetic predisposition scores for  
13 dyslipidaemia influence plasma lipid concentrations at baseline, but not the changes after  
14 controlled intake of n-3 polyunsaturated fatty acids. *Genes Nutr*. 2014 Jul;9(4):412.  
15
- 16 26. Armstrong P, Kelley DS, Newman JW, Stagers FE, Hartiala J, Allayee H, et al. Arachidonate 5-  
17 Lipoxygenase Gene Variants Affect Response to Fish Oil Supplementation by Healthy African  
18 Americans1234. *J Nutr*. 2012 Aug;142(8):1417–28.  
19
- 20 27. Binia A, Vargas-Martínez C, Ancira-Moreno M, Gosoni LM, Montoliu I, Gámez-Valdez E, et al.  
21 Improvement of cardiometabolic markers after fish oil intervention in young Mexican adults and  
22 the role of PPAR $\alpha$  L162V and PPAR $\gamma$ 2 P12A. *The Journal of Nutritional Biochemistry*. 2017  
23 May;43:98–106.  
24
- 25 28. Bouchard-Mercier A, Rudkowska I, Lemieux S, Couture P, Vohl M-C. Polymorphisms, de novo  
26 lipogenesis, and plasma triglyceride response following fish oil supplementation. *J Lipid Res*. 2013  
27 Oct;54(10):2866–73.  
28
- 29 29. Bouchard-Mercier A, Rudkowska I, Lemieux S, Couture P, Vohl M-C. Polymorphisms in Genes  
30 Involved in Fatty Acid  $\beta$ -Oxidation Interact with Dietary Fat Intakes to Modulate the Plasma TG  
31 Response to a Fish Oil Supplementation. *Nutrients*. 2014 Mar 18;6(3):1145–63.  
32
- 33 30. Bouchard-Mercier A, Rudkowska I, Lemieux S, Couture P, Vohl M-C. An interaction effect between  
34 glucokinase gene variation and carbohydrate intakes modulates the plasma triglyceride response  
35 to a fish oil supplementation. *Genes Nutr*. 2014 May;9(3):395.  
36
- 37 31. Caron-Dorval D, Paquet P, Paradis A-M, Rudkowska I, Lemieux S, Couture P, et al. Effect of the PPAR-  
38 Alpha L162V Polymorphism on the Cardiovascular Disease Risk Factor in Response to n-3  
39 Polyunsaturated Fatty Acids. *J Nutrigenet Nutrigenomics*. 2008;1(4):205–12.  
40
- 41 32. Carvalho-Wells AL, Jackson KG, Lockyer S, Lovegrove JA, Minihane AM. APOE genotype influences  
42 triglyceride and C-reactive protein responses to altered dietary fat intake in UK adults. *The*  
43 *American Journal of Clinical Nutrition*. 2012 Dec 1;96(6):1447–53.  
44
- 45 33. Lockyer S, Tzanetou M, Carvalho-Wells AL, Jackson KG, Minihane AM, Lovegrove JA. SATgene dietary  
46 model to implement diets of differing fat composition in prospectively genotyped groups (apoE)  
47 using commercially available foods. *British Journal of Nutrition*. 2012 Nov;108(9):1705–13.  
48
- 49 34. Caslake MJ, Miles EA, Kofler BM, Lietz G, Curtis P, Armah CK, et al. Effect of sex and genotype on  
50 cardiovascular biomarker response to fish oils: the FINGEN Study. *The American Journal of Clinical*  
51 *Nutrition*. 2008 Sep 1;88(3):618–29.  
52  
53  
54  
55  
56  
57  
58  
59

- 1
- 2
- 3
- 4 35. Cormier H, Rudkowska I, Paradis A-M, Thifault E, Garneau V, Lemieux S, et al. Association between
- 5 Polymorphisms in the Fatty Acid Desaturase Gene Cluster and the Plasma Triacylglycerol Response
- 6 to an n-3 PUFA Supplementation. *Nutrients*. 2012 Aug;4(8):1026–41.
- 7
- 8 36. Dang TM, Conway V, Plourde M. Disrupted fatty acid distribution in HDL and LDL according to
- 9 apolipoprotein E allele. *Nutrition*. 2015 Jun 1;31(6):807–12.
- 10
- 11 37. Dawczynski C, Massey KA, Ness C, Kiehntopf M, Stepanow S, Platzer M, et al. Randomized placebo-
- 12 controlled intervention with n-3 LC-PUFA-supplemented yoghurt: Effects on circulating eicosanoids
- 13 and cardiovascular risk factors. *Clinical Nutrition*. 2013 Oct 1;32(5):686–96.
- 14
- 15 38. Ferguson JF, Phillips CM, McMonagle J, Pérez-Martínez P, Shaw DI, Lovegrove JA, et al. NOS3 gene
- 16 polymorphisms are associated with risk markers of cardiovascular disease, and interact with
- 17 omega-3 polyunsaturated fatty acids. *Atherosclerosis*. 2010 Aug 1;211(2):539–44.
- 18
- 19 39. Harsløf LBS, Damsgaard CT, Hellgren LI, Andersen AD, Vogel U, Lauritzen L. Effects on metabolic
- 20 markers are modified by PPARG2 and COX2 polymorphisms in infants randomized to fish oil. *Genes*
- 21 *Nutr*. 2014 May;9(3):396.
- 22
- 23
- 24 40. Itariu BK, Zeyda M, Hochbrugger EE, Neuhofer A, Prager G, Schindler K, et al. Long-chain n–3 PUFAs
- 25 reduce adipose tissue and systemic inflammation in severely obese nondiabetic patients: a
- 26 randomized controlled trial. *The American Journal of Clinical Nutrition*. 2012 Nov 1;96(5):1137–49.
- 27
- 28 41. Jackson KG, Lockyer S, Carvalho-Wells AL, Williams CM, Minihane AM, Lovegrove JA. Dietary fat
- 29 manipulation has a greater impact on postprandial lipid metabolism than the apolipoprotein E
- 30 (epsilon) genotype—insights from the SATgene study. *Molecular Nutrition & Food Research*.
- 31 2012;56(12):1761–70.
- 32
- 33
- 34 42. Jackson KG, Lockyer S, Carvalho-Wells AL, Williams CM, Minihane AM, Lovegrove JA. Apolipoprotein
- 35 E (epsilon) genotype has a greater impact on apoB-48 than apoB-100 responses to dietary fat
- 36 manipulation—insights from the SATgene study. *Molecular Nutrition & Food Research*.
- 37 2017;61(4):1600688.
- 38
- 39 43. Lindi V, Schwab U, Louheranta A, Laakso M, Vessby B, Hermansen K, et al. Impact of the Pro12Ala
- 40 polymorphism of the PPAR- $\gamma$ 2 gene on serum triacylglycerol response to n–3 fatty acid
- 41 supplementation. *Molecular Genetics and Metabolism*. 2003 May;79(1):52–60.
- 42
- 43 44. Lindman AS, Pedersen JI, Hjerkin EM, Arnesen H, Veierød MB, Ellingsen I, et al. The effects of long-
- 44 term diet and omega-3 fatty acid supplementation on coagulation factor VII and serum
- 45 phospholipids with special emphasis on the R353Q polymorphism of the FVII gene. *Thromb*
- 46 *Haemost*. 2004 Jun;91(6):1097–104.
- 47
- 48 45. Madden J, Carrero J, Brunner A, Dastur N, Shearman C, Calder P, et al. Polymorphisms in the CD36
- 49 gene modulate the ability of fish oil supplements to lower fasting plasma triacyl glycerol and raise
- 50 HDL cholesterol concentrations in healthy middle-aged men. *Prostaglandins, Leukotrienes and*
- 51 *Essential Fatty Acids*. 2008;78:327–35.
- 52
- 53 46. Markovic O, O'Reilly G, Fussell HelenM, Turner SJ, Calder PC, Howell WM, et al. Role of single
- 54 nucleotide polymorphisms of pro-inflammatory cytokine genes in the relationship between serum
- 55
- 56
- 57
- 58
- 59
- 60

- lipids and inflammatory parameters, and the lipid-lowering effect of fish oil in healthy males. *Clinical Nutrition*. 2004 Oct 1;23(5):1084–95.
47. McColley SP, Georgopoulos A, Young LR, Kurzer MS, Redmon JB, Raatz SK. A high-fat diet and the threonine-encoding allele (Thr54) polymorphism of fatty acid-binding protein 2 reduce plasma triglyceride-rich lipoproteins. *Nutrition Research*. 2011 Jul 1;31(7):503–8.
48. Minihane Anne M., Khan Syrah, Leigh-Firbank Elizabeth C., Talmud Philippa, Wright John W., Murphy Margaret C., et al. ApoE Polymorphism and Fish Oil Supplementation in Subjects With an Atherogenic Lipoprotein Phenotype. *Arteriosclerosis, Thrombosis, and Vascular Biology*. 2000 Aug 1;20(8):1990–7.
49. Olano-Martin E, Anil E, Caslake MJ, Packard CJ, Bedford D, Stewart G, et al. Contribution of apolipoprotein E genotype and docosahexaenoic acid to the LDL-cholesterol response to fish oil. *Atherosclerosis*. 2010 Mar;209(1):104–10.
50. Ouellette C, Cormier H, Rudkowska I, Guénard F, Lemieux S, Couture P, et al. Polymorphisms in Genes Involved in the Triglyceride Synthesis Pathway and Marine Omega-3 Polyunsaturated Fatty Acid Supplementation Modulate Plasma Triglyceride Levels. *LFG*. 2013;6(4–5):268–80.
51. Ouellette C, Rudkowska I, Lemieux S, Lamarche B, Couture P, Vohl M-C. Gene-diet interactions with polymorphisms of the MGLL gene on plasma low-density lipoprotein cholesterol and size following an omega-3 polyunsaturated fatty acid supplementation: a clinical trial. *Lipids Health Dis*. 2014 May 24;13:86.
52. Paschos GK, Yiannakouris N, Rallidis LS, Davies I, Griffin BA, Panagiotakos DB, et al. Apolipoprotein E Genotype in Dyslipidemic Patients and Response of Blood Lipids and Inflammatory Markers to Alpha-Linolenic Acid. *Angiology*. 2005 Jan 1;56(1):49–60.
53. Pishva H, Mahboob S-A, Mehdipour P, Eshraghian MR, Mohammadi-Asl J, Hosseini S, et al. Fatty acid-binding protein-2 genotype influences lipid and lipoprotein response to eicosapentaenoic acid supplementation in hypertriglyceridemic subjects. *Nutrition*. 2010 Nov 1;26(11):1117–21.
54. Pishva H, Mehdipour P, Eshraghian MR, Mahboob S-A. Effects of Eicosapentaenoic Acid Supplementation on Lipid and Lipoprotein Profile in Hypertriglyceridemic Subjects with Different Proliferator-activated Receptor Alpha Genotypes. *Int J Prev Med*. 2014 Mar;5(3):333–40.
55. Roke K, Mutch DM. The Role of FADS1/2 Polymorphisms on Cardiometabolic Markers and Fatty Acid Profiles in Young Adults Consuming Fish Oil Supplements. *Nutrients*. 2014 Jun 16;6(6):2290–304.
56. Rudkowska I, Julien P, Couture P, Lemieux S, Tchernof A, Barbier O, et al. Cardiometabolic risk factors are influenced by Stearoyl-CoA Desaturase (SCD) –1 gene polymorphisms and n-3 polyunsaturated fatty acid supplementation. *Molecular Nutrition & Food Research*. 2014;58(5):1079–86.
57. Rudkowska I, Guénard F, Julien P, Couture P, Lemieux S, Barbier O, et al. Genome-wide association study of the plasma triglyceride response to an n-3 polyunsaturated fatty acid supplementation. *J Lipid Res*. 2014 Jul;55(7):1245–53.

- 1  
2  
3  
4  
5  
6  
7  
8  
9  
10  
11  
12  
13  
14  
15  
16  
17  
18  
19  
20  
21  
22  
23  
24  
25  
26  
27  
28  
29  
30  
31  
32  
33  
34  
35  
36  
37  
38  
39  
40  
41  
42  
43  
44  
45  
46  
47  
48  
49  
50  
51  
52  
53  
54  
55  
56  
57  
58  
59  
60
58. Scorletti E, West AL, Bhatia L, Hoile SP, McCormick KG, Burdge GC, et al. Treating liver fat and serum triglyceride levels in NAFLD, effects of PNPLA3 and TM6SF2 genotypes: Results from the WELCOME trial. *Journal of Hepatology*. 2015 Dec 1;63(6):1476–83.
  59. Thifault E, Cormier H, Bouchard-Mercier A, Rudkowska I, Paradis A-M, Garneau V, et al. Effects of Age, Sex, Body Mass Index and APOE Genotype on Cardiovascular Biomarker Response to an n-3 Polyunsaturated Fatty Acid Supplementation. *LFG*. 2013;6(2):73–82.
  60. Tremblay BL, Cormier H, Rudkowska I, Lemieux S, Couture P, Vohl M-C. Association between polymorphisms in phospholipase A2 genes and the plasma triglyceride response to an n-3 PUFA supplementation: a clinical trial. *Lipids in Health and Disease*. 2015 Feb 21;14(1):12.
  61. Bastien Vallée Marcotte, Cormier H, Guénard F, Rudkowska I, Lemieux S, Couture P, et al. Novel Genetic Loci Associated with the Plasma Triglyceride Response to an Omega-3 Fatty Acid Supplementation. *J Nutigenet Nutrigenomics*. 2016;9:1–11.
  62. Vallée Marcotte B, Guénard F, Marquis J, Charpagne A, Vadillo-Ortega F, Tejero ME, et al. Genetic Risk Score Predictive of the Plasma Triglyceride Response to an Omega-3 Fatty Acid Supplementation in a Mexican Population. *Nutrients* [Internet]. 2019 Mar 29 [cited 2020 Aug 3];11(4). Available from: <https://www.ncbi.nlm.nih.gov/pmc/articles/PMC6521301/>
  63. Vallée Marcotte B, Guénard F, Lemieux S, Couture P, Rudkowska I, Calder PC, et al. Fine mapping of genome-wide association study signals to identify genetic markers of the plasma triglyceride response to an omega-3 fatty acid supplementation.
  64. Vallée Marcotte B, Allaire J, Guénard F, de Toro-Martín J, Couture P, Lamarche B, et al. Genetic risk prediction of the plasma triglyceride response to independent supplementations with eicosapentaenoic and docosahexaenoic acids: the ComparED Study. *Genes Nutr*. 2020 Dec;15(1):10.
  65. Wu S-Y, Mayneris-Perxachs J, Lovegrove JA, Todd S, Yaqoob P. Fish-oil supplementation alters numbers of circulating endothelial progenitor cells and microparticles independently of eNOS genotype. *The American Journal of Clinical Nutrition*. 2014 Nov 1;100(5):1232–43.
  66. Zheng J-S, Chen J, Wang L, Yang H, Fang L, Yu Y, et al. Replication of a Gene-Diet Interaction at CD36, NOS3 and PPARG in Response to Omega-3 Fatty Acid Supplements on Blood Lipids: A Double-Blind Randomized Controlled Trial. *EBioMedicine*. 2018 Apr 17;31:150–6.
  67. Vallée Marcotte B, Guénard F, Lemieux S, Couture P, Rudkowska I, Calder PC, et al. Fine mapping of genome-wide association study signals to identify genetic markers of the plasma triglyceride response to an omega-3 fatty acid supplementation. *The American Journal of Clinical Nutrition*. 2019 Jan 1;109(1):176–85.



# PRISMA 2009 Checklist

| Section/topic                      | #  | Checklist item                                                                                                                                                                                                                                                                                              | Reported on page # |
|------------------------------------|----|-------------------------------------------------------------------------------------------------------------------------------------------------------------------------------------------------------------------------------------------------------------------------------------------------------------|--------------------|
| <b>TITLE</b>                       |    |                                                                                                                                                                                                                                                                                                             |                    |
| Title                              | 1  | Identify the report as a systematic review, meta-analysis, or both.                                                                                                                                                                                                                                         | 1                  |
| <b>ABSTRACT</b>                    |    |                                                                                                                                                                                                                                                                                                             |                    |
| Structured summary                 | 2  | Provide a structured summary including, as applicable: background; objectives; data sources; study eligibility criteria, participants, and interventions; study appraisal and synthesis methods; results; limitations; conclusions and implications of key findings; systematic review registration number. | 2                  |
| <b>INTRODUCTION</b>                |    |                                                                                                                                                                                                                                                                                                             |                    |
| Rationale                          | 3  | Describe the rationale for the review in the context of what is already known.                                                                                                                                                                                                                              | 3-5                |
| Objectives                         | 4  | Provide an explicit statement of questions being addressed with reference to participants, interventions, comparisons, outcomes, and study design (PICOS).                                                                                                                                                  | 5-6                |
| <b>METHODS</b>                     |    |                                                                                                                                                                                                                                                                                                             |                    |
| Protocol and registration          | 5  | Indicate if a review protocol exists, if and where it can be accessed (e.g., Web address), and, if available, provide registration information including registration number.                                                                                                                               | 5                  |
| Eligibility criteria               | 6  | Specify study characteristics (e.g., PICOS, length of follow-up) and report characteristics (e.g., years considered, language, publication status) used as criteria for eligibility, giving rationale.                                                                                                      | 5-6                |
| Information sources                | 7  | Describe all information sources (e.g., databases with dates of coverage, contact with study authors to identify additional studies) in the search and date last searched.                                                                                                                                  | 5, 7               |
| Search                             | 8  | Present full electronic search strategy for at least one database, including any limits used, such that it could be repeated.                                                                                                                                                                               | Suppl. T1          |
| Study selection                    | 9  | State the process for selecting studies (i.e., screening, eligibility, included in systematic review, and, if applicable, included in the meta-analysis).                                                                                                                                                   | 6-7                |
| Data collection process            | 10 | Describe method of data extraction from reports (e.g., piloted forms, independently, in duplicate) and any processes for obtaining and confirming data from investigators.                                                                                                                                  | 6-7                |
| Data items                         | 11 | List and define all variables for which data were sought (e.g., PICOS, funding sources) and any assumptions and simplifications made.                                                                                                                                                                       | 5-7                |
| Risk of bias in individual studies | 12 | Describe methods used for assessing risk of bias of individual studies (including specification of whether this was done at the study or outcome level), and how this information is to be used in any data synthesis.                                                                                      | 8-9                |
| Summary measures                   | 13 | State the principal summary measures (e.g., risk ratio, difference in means).                                                                                                                                                                                                                               | 9                  |



# PRISMA 2009 Checklist

|                      |    |                                                                                                                                                           |                                    |
|----------------------|----|-----------------------------------------------------------------------------------------------------------------------------------------------------------|------------------------------------|
| Synthesis of results | 14 | Describe the methods of handling data and combining results of studies, if done, including measures of consistency (e.g., $I^2$ ) for each meta-analysis. | NA (meta-analysis not appropriate) |
|----------------------|----|-----------------------------------------------------------------------------------------------------------------------------------------------------------|------------------------------------|

Page 1 of 2

| Section/topic                 | #  | Checklist item                                                                                                                                                                                           | Reported on page # |
|-------------------------------|----|----------------------------------------------------------------------------------------------------------------------------------------------------------------------------------------------------------|--------------------|
| Risk of bias across studies   | 15 | Specify any assessment of risk of bias that may affect the cumulative evidence (e.g., publication bias, selective reporting within studies).                                                             | Table 4            |
| Additional analyses           | 16 | Describe methods of additional analyses (e.g., sensitivity or subgroup analyses, meta-regression), if done, indicating which were pre-specified.                                                         | 11-12              |
| <b>RESULTS</b>                |    |                                                                                                                                                                                                          |                    |
| Study selection               | 17 | Give numbers of studies screened, assessed for eligibility, and included in the review, with reasons for exclusions at each stage, ideally with a flow diagram.                                          | Figure 1           |
| Study characteristics         | 18 | For each study, present characteristics for which data were extracted (e.g., study size, PICOS, follow-up period) and provide the citations.                                                             | Tables 1 and 2     |
| Risk of bias within studies   | 19 | Present data on risk of bias of each study and, if available, any outcome level assessment (see item 12).                                                                                                | Table 4            |
| Results of individual studies | 20 | For all outcomes considered (benefits or harms), present, for each study: (a) simple summary data for each intervention group (b) effect estimates and confidence intervals, ideally with a forest plot. | Tables 1 and 2     |
| Synthesis of results          | 21 | Present results of each meta-analysis done, including confidence intervals and measures of consistency.                                                                                                  | NA                 |
| Risk of bias across studies   | 22 | Present results of any assessment of risk of bias across studies (see Item 15).                                                                                                                          | Table 4            |
| Additional analysis           | 23 | Give results of additional analyses, if done (e.g., sensitivity or subgroup analyses, meta-regression [see Item 16]).                                                                                    | 11-12, Table 3     |
| <b>DISCUSSION</b>             |    |                                                                                                                                                                                                          |                    |
| Summary of evidence           | 24 | Summarize the main findings including the strength of evidence for each main outcome; consider their relevance to key groups (e.g., healthcare providers, users, and policy makers).                     | Table 3, 34-39     |
| Limitations                   | 25 | Discuss limitations at study and outcome level (e.g., risk of bias), and at review-level (e.g., incomplete retrieval of identified research, reporting bias).                                            | 45-46              |
| Conclusions                   | 26 | Provide a general interpretation of the results in the context of other evidence, and implications for future research.                                                                                  | 40-47              |
| <b>FUNDING</b>                |    |                                                                                                                                                                                                          |                    |



# PRISMA 2009 Checklist

|         |    |                                                                                                                                            |    |
|---------|----|--------------------------------------------------------------------------------------------------------------------------------------------|----|
| Funding | 27 | Describe sources of funding for the systematic review and other support (e.g., supply of data); role of funders for the systematic review. | 47 |
|---------|----|--------------------------------------------------------------------------------------------------------------------------------------------|----|

From: Moher D, Liberati A, Tetzlaff J, Altman DG, The PRISMA Group (2009). Preferred Reporting Items for Systematic Reviews and Meta-Analyses: The PRISMA Statement. PLoS Med 6(7): e1000097. doi:10.1371/journal.pmed1000097  
For more information, visit: [www.prisma-statement.org](http://www.prisma-statement.org).

Page 2 of 2

For peer review only
