# Supplementary material for: Nutrigenetics, omega-3 and plasma lipids/lipoproteins/apolipoproteins with evidence evaluation using the GRADE approach: a systematic review
Source: PubMed Central journal article supplement — BMJ Open. 2022 Feb 22;12(2):e054417. doi: 10.1136/bmjopen-2021-054417 (PMC8867311; doi:10.1136/bmjopen-2021-054417), 2022-02-22
Supplement: bmjopen-2021-054417supp001.pdf [file bmjopen-2021-054417supp001.pdf]

**Supplementary Tables***Supplementary Table 1: Search Strategy*

| <b>Embase</b> |                                                                                                                                                                                                                                                                                                                                                                                                                                                                                   |
|---------------|-----------------------------------------------------------------------------------------------------------------------------------------------------------------------------------------------------------------------------------------------------------------------------------------------------------------------------------------------------------------------------------------------------------------------------------------------------------------------------------|
| <b>#</b>      | <b>Search Strategy</b>                                                                                                                                                                                                                                                                                                                                                                                                                                                            |
| 1             | omega-3':ti,ab,kw OR pufa\$:ti,ab,kw OR ((acid* NEAR/5 ('n-3' OR polyunsaturated OR linolenic OR eicosapenta\$noic OR timnodonic OR docosahexa\$noic)):ti,ab,kw) OR docosahexaenoate:ti,ab,kw OR epa:ti,ab,kw OR dha:ti,ab,kw OR ala:ti,ab,kw                                                                                                                                                                                                                                     |
| 2             | omega 3 fatty acid'/exp                                                                                                                                                                                                                                                                                                                                                                                                                                                           |
| 3             | <b>#1 OR #2</b>                                                                                                                                                                                                                                                                                                                                                                                                                                                                   |
| 4             | cholesterol*:ti,ab,kw OR hdl:ti,ab,kw OR ldl:ti,ab,kw OR 'high density lipoprotein*':ti,ab,kw OR 'low density lipoprotein*':ti,ab,kw OR 'beta lipoprotein*':ti,ab,kw OR apo*protein*:ti,ab,kw OR apoa:ti,ab,kw OR apob:ti,ab,kw OR apoc:ti,ab,kw OR apod:ti,ab,kw OR apoe:ti,ab,kw OR apoh:ti,ab,kw OR ((apo NEXT/1 (a OR b OR c OR d OR e OR h)):ti,ab,kw) OR triglyceride*:ti,ab,kw OR triacylglycerol*:ti,ab,kw OR (((serum OR plasma) NEXT/1 (lipid* OR tg OR tag)):ti,ab,kw) |
| 5             | cholesterol'/exp OR 'lipoprotein'/exp OR 'triacylglycerol'/exp                                                                                                                                                                                                                                                                                                                                                                                                                    |
| 6             | <b>#4 OR #5</b>                                                                                                                                                                                                                                                                                                                                                                                                                                                                   |
| 7             | nutrigenomic*:ti,ab,kw OR nutrigenetic*:ti,ab,kw OR (((nutritional OR expression* OR variation* OR variant*) NEAR/2 (genomic* OR genetic* OR gene OR genes)):ti,ab,kw) OR genotype:ti,ab,kw OR (('nutrient-gene' OR 'gene-nutrient' OR 'gene-diet') NEXT/1 interaction*):ti,ab,kw) OR 'personalized nutrition':ti,ab,kw OR 'precision nutrition':ti,ab,kw                                                                                                                         |
| 8             | nutrigenomics'/exp OR 'nutrigenetics'/exp OR 'genetic variation'/exp OR 'genotype'/exp                                                                                                                                                                                                                                                                                                                                                                                            |
| 9             | <b>#7 OR #8</b>                                                                                                                                                                                                                                                                                                                                                                                                                                                                   |
| 10            | <b>#3 AND #6 AND #9</b>                                                                                                                                                                                                                                                                                                                                                                                                                                                           |
| 11            | [animals]/lim NOT [humans]/lim                                                                                                                                                                                                                                                                                                                                                                                                                                                    |
| 12            | <b>#10 NOT #11</b>                                                                                                                                                                                                                                                                                                                                                                                                                                                                |

## Medline (Ovid)

| #  | Search Strategy                                                                                                                                                                                                                                                                                                            |
|----|----------------------------------------------------------------------------------------------------------------------------------------------------------------------------------------------------------------------------------------------------------------------------------------------------------------------------|
| 1  | ("omega-3" or PUFA? or (acid* adj5 ("n-3" or polyunsaturated or linolenic or eicosapenta?noic or timnodonic or docosahexa?noic)) or docosahexaenoate or EPA or DHA or ALA).ab,kf,ti.                                                                                                                                       |
| 2  | exp Fatty Acids, Omega-3/                                                                                                                                                                                                                                                                                                  |
| 3  | <b>1 or 2</b>                                                                                                                                                                                                                                                                                                              |
| 4  | (cholesterol* or HDL or LDL or "high density lipoprotein*" or "low density lipoprotein*" or "beta lipoprotein*" or apo*protein* or apoA or apoB or apoC or apoD or apoE or apoH or (apo adj (A or B or C or D or E or H)) or triglyceride* or triacylglycerol* or ((serum or plasma) adj (lipid* or TG or TAG))).ab,kf,ti. |
| 5  | exp Cholesterol/ or exp Lipoproteins/ or exp Triglycerides/                                                                                                                                                                                                                                                                |
| 6  | <b>4 or 5</b>                                                                                                                                                                                                                                                                                                              |
| 7  | (nutrigenomic* or nutrigenetic* or ((nutritional or expression* or variation* or variant*) adj2 (genomic* or genetic* or gene or genes)) or genotype or (("nutrient-gene" or "gene-nutrient" or "gene-diet") adj interaction*) or "personalized nutrition" or "precision nutrition").ab,kf,ti.                             |
| 8  | Nutrigenomics/ or Genetic Variation/ or Genotype/                                                                                                                                                                                                                                                                          |
| 9  | <b>7 or 8</b>                                                                                                                                                                                                                                                                                                              |
| 10 | <b>3 and 6 and 9</b>                                                                                                                                                                                                                                                                                                       |
| 11 | exp animals/ not humans.sh.                                                                                                                                                                                                                                                                                                |
| 12 | <b>10 not 11</b>                                                                                                                                                                                                                                                                                                           |

## Web of Science

*Indexes = SCI-EXPANDED, SSCI, A&HCI, CPCI-S, CPCI-SSH, ESCI Timespan =All years*

| # | Search Strategy                                                                                                                                                                                                                                                                                                                                                                                                                                                                                                                                                                                                                                                                                                                                                                                                                                                                                                                                                                                                                                                                                                                                                                                                                                                                                                                                                                                                                                                                                                                                                                                                                                                                                                                                                                                                                                                                                                                                                                                                                                                                                                                                                                                                                                                                                                                                                                                                                                                                                                                                                                                                                                                                                                                                                                                                                                                                                                                                                      |
|---|----------------------------------------------------------------------------------------------------------------------------------------------------------------------------------------------------------------------------------------------------------------------------------------------------------------------------------------------------------------------------------------------------------------------------------------------------------------------------------------------------------------------------------------------------------------------------------------------------------------------------------------------------------------------------------------------------------------------------------------------------------------------------------------------------------------------------------------------------------------------------------------------------------------------------------------------------------------------------------------------------------------------------------------------------------------------------------------------------------------------------------------------------------------------------------------------------------------------------------------------------------------------------------------------------------------------------------------------------------------------------------------------------------------------------------------------------------------------------------------------------------------------------------------------------------------------------------------------------------------------------------------------------------------------------------------------------------------------------------------------------------------------------------------------------------------------------------------------------------------------------------------------------------------------------------------------------------------------------------------------------------------------------------------------------------------------------------------------------------------------------------------------------------------------------------------------------------------------------------------------------------------------------------------------------------------------------------------------------------------------------------------------------------------------------------------------------------------------------------------------------------------------------------------------------------------------------------------------------------------------------------------------------------------------------------------------------------------------------------------------------------------------------------------------------------------------------------------------------------------------------------------------------------------------------------------------------------------------|
| 1 | TS=("omega-3" or PUFA\$ or (acid* NEAR/5 ("n-3" or polyunsaturated or linolenic or eicosapenta\$noic or timnodonic or docosahexa\$noic)) or docosahexaenoate or EPA or DHA or ALA)                                                                                                                                                                                                                                                                                                                                                                                                                                                                                                                                                                                                                                                                                                                                                                                                                                                                                                                                                                                                                                                                                                                                                                                                                                                                                                                                                                                                                                                                                                                                                                                                                                                                                                                                                                                                                                                                                                                                                                                                                                                                                                                                                                                                                                                                                                                                                                                                                                                                                                                                                                                                                                                                                                                                                                                   |
| 2 | TS=(cholesterol* or HDL or LDL or "high density lipoprotein*" or "low density lipoprotein*" or "beta lipoprotein*" or apo*protein* or apoA or apoB or apoC or apoD or apoE or apoH or (apo NEAR/0 (A or B or C or D or E or H)) or triglyceride* or triacylglycerol* or ((serum or plasma) NEAR/0 (lipid* or TG or TAG)))                                                                                                                                                                                                                                                                                                                                                                                                                                                                                                                                                                                                                                                                                                                                                                                                                                                                                                                                                                                                                                                                                                                                                                                                                                                                                                                                                                                                                                                                                                                                                                                                                                                                                                                                                                                                                                                                                                                                                                                                                                                                                                                                                                                                                                                                                                                                                                                                                                                                                                                                                                                                                                            |
| 3 | TS=(nutrigenomic* or nutrigenetic* or ((nutritional or expression* or variation* or variant*) NEAR/2 (genomic* or genetic* or gene or genes)) or genotype or (("nutrient-gene" or "gene-nutrient" or "gene-diet") NEAR/0 interaction*) or "personalized nutrition" or "precision nutrition" )                                                                                                                                                                                                                                                                                                                                                                                                                                                                                                                                                                                                                                                                                                                                                                                                                                                                                                                                                                                                                                                                                                                                                                                                                                                                                                                                                                                                                                                                                                                                                                                                                                                                                                                                                                                                                                                                                                                                                                                                                                                                                                                                                                                                                                                                                                                                                                                                                                                                                                                                                                                                                                                                        |
| 4 | <b>#1 AND #2 AND #3</b>                                                                                                                                                                                                                                                                                                                                                                                                                                                                                                                                                                                                                                                                                                                                                                                                                                                                                                                                                                                                                                                                                                                                                                                                                                                                                                                                                                                                                                                                                                                                                                                                                                                                                                                                                                                                                                                                                                                                                                                                                                                                                                                                                                                                                                                                                                                                                                                                                                                                                                                                                                                                                                                                                                                                                                                                                                                                                                                                              |
| 5 | TS=(animals OR animal OR mice OR mus OR mouse OR murine OR woodmouse OR rats OR rat OR murinae OR muridae OR cottonrat OR cottonrats OR hamster OR hamsters OR cricetinae OR rodentia OR rodent OR rodents OR pigs OR pig OR swine OR swines OR piglets OR piglet OR boar OR boars OR "sus scrofa" OR ferrets OR ferret OR polecat OR polecats OR "mustela putorius" OR "guinea pigs" OR "guinea pig" OR cavia OR callithrix OR marmoset OR marmosets OR cebuella OR hapale OR octodon OR chinchilla OR chinchillas OR gerbillinae OR gerbil OR gerbils OR jird OR jirds OR merione OR meriones OR rabbits OR rabbit OR hares OR hare OR diptera OR flies OR fly OR dipteral OR drosophila OR drosophilidae OR cats OR cat OR carus OR felis OR nematoda OR nematode OR nematoda OR nematode OR nematodes OR sipunculida OR dogs OR dog OR canine OR canines OR canis OR sheep OR sheeps OR mouflon OR mouflons OR ovis OR goats OR goat OR capra OR capras OR rupicapra OR chamois OR haplorhini OR monkey OR monkeys OR anthropoidea OR anthropoids OR saguinus OR tamarin OR tamarins OR leontopithecus OR hominidae OR ape OR apes OR pan OR paniscus OR "pan paniscus" OR bonobo OR bonobos OR troglodytes OR "pan troglodytes" OR gibbon OR gibbons OR siamang OR siamangs OR nomascus OR symphalangus OR chimpanzee OR chimpanzees OR prosimians OR "bush baby" OR prosimian OR bush babies OR galagos OR galago OR pongidae OR gorilla OR gorillas OR pongo OR pygmaeus OR "pongo pygmaeus" OR orangutans OR pygmaeus OR lemur OR lemurs OR lemuridae OR horse OR horses OR pongo OR equus OR cow OR calf OR bull OR chicken OR chickens OR gallus OR quail OR bird OR birds OR quails OR poultry OR poultries OR fowl OR fowls OR reptile OR reptilia OR reptiles OR snakes OR snake OR lizard OR lizards OR alligator OR alligators OR crocodile OR crocodiles OR turtle OR turtles OR amphibian OR amphibians OR amphibia OR frog OR frogs OR bombina OR salientia OR toad OR toads OR "epidalea calamita" OR salamander OR salamanders OR eel OR eels OR scuridae OR squirrel OR squirrels OR chipmunk OR chipmunks OR suslik OR susliks OR vole OR voles OR lemming OR lemmings OR muskrat OR muskrats OR lemmus OR otter OR otters OR marten OR martens OR martes OR weasel OR badger OR badgers OR ermine OR mink OR minks OR sable OR sables OR gulo OR gulos OR wolverine OR wolverines OR minks OR mustela OR llama OR llamas OR alpaca OR alpacas OR camelid OR camelids OR guanaco OR guanacos OR chiroptera OR chiropteras OR bat OR bats OR fox OR foxes OR iguana OR iguanas OR xenopus laevis OR parakeet OR parakeets OR parrot OR parrots OR donkey OR donkeys OR mule OR mules OR zebra OR zebras OR shrew OR shrews OR bison OR bisons OR buffalo OR buffaloes OR deer OR deers OR bear OR bears OR panda OR pandas OR "wild hog" OR "wild boar" OR fitchew OR fitch OR beaver OR beavers OR jerboa OR jerboas OR capybara OR capybaras) |
| 6 | <b>#4 not #5</b>                                                                                                                                                                                                                                                                                                                                                                                                                                                                                                                                                                                                                                                                                                                                                                                                                                                                                                                                                                                                                                                                                                                                                                                                                                                                                                                                                                                                                                                                                                                                                                                                                                                                                                                                                                                                                                                                                                                                                                                                                                                                                                                                                                                                                                                                                                                                                                                                                                                                                                                                                                                                                                                                                                                                                                                                                                                                                                                                                     |

Supplementary Table 2: Summary of observational studies

| Author, Year                     | Study Design                                         | Genetic Approach                       | Population (sample size included in analyses)                                        | Gene(s), SNP(s)                                                                                                                                            | Cytogenic Location of Gene(s)                                              | Quantity, Source and Type of Omega-3 <sup>1</sup>                                                                  | Comparators                                                                                                                                                                                   | Plasma Lipid/Lipoprotein Outcome(s) | Summary of Statistically Significant Study Findings Relevant to the Research Question <sup>2</sup>                                                                                                                                                                                                                                                                                                                                                                                                                           |
|----------------------------------|------------------------------------------------------|----------------------------------------|--------------------------------------------------------------------------------------|------------------------------------------------------------------------------------------------------------------------------------------------------------|----------------------------------------------------------------------------|--------------------------------------------------------------------------------------------------------------------|-----------------------------------------------------------------------------------------------------------------------------------------------------------------------------------------------|-------------------------------------|------------------------------------------------------------------------------------------------------------------------------------------------------------------------------------------------------------------------------------------------------------------------------------------------------------------------------------------------------------------------------------------------------------------------------------------------------------------------------------------------------------------------------|
| Bouchard-Mercier et al. 2011 (1) | Cross-Sectional                                      | Single SNP                             | Healthy Caucasian men and women from INFOGENE study (n=674)                          | <i>PPARα</i> , L162V (rs1800206)<br><i>PPARγ</i> , P12A (rs1801282)<br><i>PPARδ</i> , -87T→C (rs2016520)                                                   | <i>PPARα</i> : 22q13.31<br><i>PPARγ</i> : 3p25.2<br><i>PPARδ</i> : 6p21.31 | Mean:<br>L162: 2.8 g/day<br>V162: 2.9 g/day<br>(unclear if food and/or supplement sources)                         | Minor allele carriers vs. Non-carriers                                                                                                                                                        | LDL-PPD                             | <b>LDL-PPD:</b> In a model including age, sex, TG, BMI, energy and omega-3 intakes and <i>PPARα</i> L162V (rs1800206) polymorphism, the interaction of <i>PPARα</i> L162V and omega-3 intakes explained 0.62% of the variance in LDL-PPD.                                                                                                                                                                                                                                                                                    |
| Bodhini et al. 2017 (2)          | Cross-Sectional                                      | Single SNP                             | Adults with normal glucose tolerance (n=821) and adults with type 2 diabetes (n=861) | <i>MC4R</i> , rs17782313<br><i>TCF7L2</i> , rs12255372<br><i>TCF7L2</i> , rs7903146                                                                        | <i>MC4R</i> : 18q21.32<br><i>TCF7L2</i> : 10q25.2-q25.3                    | <b>Low:</b> 0.38 g/day ALA<br><b>Moderate:</b> 0.58 g/day ALA<br><b>High:</b> 0.89 g/day ALA (means) (food)        | Major allele homozygotes vs. Minor allele carriers                                                                                                                                            | HDL-c                               | <b>HDL-c:</b> 'T' allele carriers of <i>TCF7L2</i> rs12255372 within the lowest tertile of ALA intake (mean=0.38 g/day) exhibited higher levels of HDL-c compared to GG homozygotes in the lowest tertile of ALA intake (mean=0.38 g/day)                                                                                                                                                                                                                                                                                    |
| Chen et al. 2019 (3)             | Cross-Sectional Analysis within a Prospective Cohort | Single SNP, Haplotype and Gene-Centric | Adults of Swedish ancestry from the GLACIER cohort (n=5160)                          | All variations in the <i>FADS1</i> - <i>FADS2</i> - <i>FADS3</i> gene cluster and variation within 200kb upstream and downstream of the <i>FADS</i> region | <i>FADS1</i> : 11q12.2<br><i>FADS2</i> : 11q12.2<br><i>FADS3</i> : 11q12.2 | <b>High:</b> >1.6 g/day<br><b>Low:</b> <1.6 g/day (food)                                                           | Entire <i>FADS</i> region gene-centric analysis and Variation in individual <i>FADS</i> cluster SNPs: rs174570, rs174602, rs74771917, rs3168072, rs12577276, rs7115739 and Haplotype analysis | HDL-c<br>LDL-c<br>TG<br>Total-c     | <b>HDL-c:</b> Significant interaction of rs174570 and omega-3 on HDL-c<br><b>LDL-c:</b> Significant interaction of rs174602 and omega-3 on LDL-c<br><b>TG:</b> Gene-centric analyses demonstrated a significant interaction between variation in the <i>FADS</i> gene cluster and omega-3 intake on TG<br><b>Total-c:</b> Significant interaction of rs174602 and omega-3 on total-c ('C' allele carriers exhibited lower total-c with low omega-3 intake, while no such relationship was observed with high omega-3 intake) |
| Ching et al. 2019 (4)            | Cross-Sectional                                      | Single SNP                             | Vegetarian adults of Malaysian ancestry (n=200)                                      | <i>FADS1</i> , rs174547                                                                                                                                    | <i>FADS1</i> : 11q12.2                                                     | <b>Low:</b> ≤0.45 g/day ALA<br><b>Moderate:</b> 0.46-0.64 g/day ALA<br><b>High:</b> >0.64 g/day ALA (means) (food) | Comparison between three genotypes                                                                                                                                                            | HDL-c<br>TG                         | <b>HDL-c:</b> The TT genotype had significantly lower HDL-c when ALA intake was in the moderate intake range, but there were no significant gene-omega-3 interaction on lipid levels                                                                                                                                                                                                                                                                                                                                         |
| Dumont et al. 2011 (5)           | Cross-Sectional                                      | Single SNP                             | Adolescents of European ancestry (n=573)                                             | <i>FADS1</i> , rs174547                                                                                                                                    | <i>FADS1</i> : 11q12.2                                                     | <b>High:</b> >1.4 g/day ALA<br><b>Low:</b> ≤1.4 g/day ALA<br>(unclear if food and/or supplement sources)           | Major allele homozygotes vs. Minor allele carriers                                                                                                                                            | HDL-c<br>LDL-c<br>TG<br>Total-c     | <b>Total-c:</b> Significant interaction whereby the minor allele (CT+TT genotype) was associated with lower total-c when ALA intake is high as compared to when intake is low. This remained significant after assessing the interaction using ALA intake as a continuous variable.                                                                                                                                                                                                                                          |

|                                        |                                                                                       |               |                                                                                                 |                                                             |                                         |                                                                                                                                                                                                                                                  |                                                                                                                            |                                 |                                                                                                                                                                                                                                                                                                                                                                                                                                                                                                                                                                                                               |
|----------------------------------------|---------------------------------------------------------------------------------------|---------------|-------------------------------------------------------------------------------------------------|-------------------------------------------------------------|-----------------------------------------|--------------------------------------------------------------------------------------------------------------------------------------------------------------------------------------------------------------------------------------------------|----------------------------------------------------------------------------------------------------------------------------|---------------------------------|---------------------------------------------------------------------------------------------------------------------------------------------------------------------------------------------------------------------------------------------------------------------------------------------------------------------------------------------------------------------------------------------------------------------------------------------------------------------------------------------------------------------------------------------------------------------------------------------------------------|
| Dumont et al. 2018 (6)                 | Cross-Sectional                                                                       | Single SNP    | Men and women aged 35 to 74 years from the MONA LISA Study of three French populations (n=3069) | <i>FADS1</i> , rs174547                                     | <i>FADS1</i> : 11q12.2                  | <b>Low:</b> 0.6 g/day ALA (mean)<br><b>Median:</b> 0.8 g/day ALA (stratified by median for analyses)<br><b>High:</b> 1.3 g/day ALA (mean) (food and supplement)                                                                                  | Comparison between three genotypes                                                                                         | HDL-c<br>LDL-c<br>TG<br>Total-c | --                                                                                                                                                                                                                                                                                                                                                                                                                                                                                                                                                                                                            |
| Fallaize et al. 2016 (7)               | Cross-Sectional (Baseline) and Longitudinal Analyses within a Randomized Intervention | Single SNP*   | Healthy adults enrolled in the Food4Me European trial (n=1466)                                  | <i>APOE</i> , rs429358, rs7412                              | <i>APOE</i> : 19q13.32                  | <b>High:</b> >0.67 %kcal<br><b>Low:</b> <0.67 %kcal<br><b>Increased Intake:</b> reduced omega-3 intake from baseline<br><b>Decreased Intake:</b> decreased omega-3 intake from baseline (unclear if food and/or supplement sources)              | <i>APOE</i> -E4 vs. <i>APOE</i> -E4+                                                                                       | Total-c                         | <b>Total-c:</b> Cross-sectional (baseline) analysis demonstrated a significant genotype effect for <i>APOE</i> , omega-3 intake, and total-c. Longitudinal analysis (baseline to month 6) demonstrated a significant genotype effect for <i>APOE</i> , change in omega-3 intake (increase or decrease) and total-c.                                                                                                                                                                                                                                                                                           |
| Fontaine-Bisson and El-Sohemy 2007 (8) | Cross-Sectional                                                                       | Genetic Score | Men and women aged 20-29 years (n=595)                                                          | <i>TNF<math>\alpha</math></i> , rs361525, rs1800629         | <i>TNF<math>\alpha</math></i> : 6p21.33 | Intake range: 0.2-4.6 %kcal (mean intakes were 0.7 %kcal for 0/0, 0.7% kcal for 0/1 and 0.6%kcal for 1/0) (food)                                                                                                                                 | No minor allele ('A') for both SNPs (0/0) vs. One minor allele for rs361525 (1/0) vs. One minor allele for rs1800625 (0/1) | HDL-c                           | --                                                                                                                                                                                                                                                                                                                                                                                                                                                                                                                                                                                                            |
| Fontaine-Bisson et al. 2009 (9)        | Cross-Sectional                                                                       | Single SNP    | Healthy men and women aged 20-29 years (n=593)                                                  | <i>NF-<math>\kappa</math>B</i> -94Ins/Del ATTG (rs28362491) | <i>NF-<math>\kappa</math>B</i> : 4q24   | Mean intake: 0.7 %kcal (unclear if food and/or supplement sources)                                                                                                                                                                               | Ins/Ins vs. Ins/Del vs. Del/Del                                                                                            | HDL-c                           | <b>HDL-c:</b> Significant interaction between <i>NF-<math>\kappa</math>B</i> genotype and omega-3 intake on HDL-c                                                                                                                                                                                                                                                                                                                                                                                                                                                                                             |
| Hellstrand et al. 2012 (10)            | Cross-Sectional                                                                       | Single SNP    | Healthy men and women aged 45-68 years from Sweden (n=4635)                                     | <i>FADS</i> , rs174547                                      | <i>FADS</i> : 11q12.2                   | <b>Low:</b> $\leq$ 0.14 %kcal long-chain omega-3<br><b>Moderate:</b> 0.14-0.28 %kcal long-chain omega-3<br><b>High:</b> >0.28 %kcal long-chain omega-3 (tertiles of intake reported only for certain significant findings) (food and supplement) | TT vs. TC vs. CC                                                                                                           | HDL-c<br>LDL-c<br>TG            | <b>LDL-c:</b> Significant interaction between <i>FADS</i> rs174547 genotype and long-chain omega-3 on LDL-c whereby the 'C' allele was significantly associated with lower LDL-c when long-chain omega-3 intake was in the lowest tertile (but not in the moderate or highest tertile). High long-chain omega-3 intake was associated with significantly higher LDL-c for CC and TC genotypes but not TT genotypes. Stratified analysis based on sex demonstrated that these significant interactions remained for men, but not women, however there was not a significant difference in interactions by sex. |
| Hosseini-Esfahani et al. 2017 (11)     | Nested Case-Control                                                                   | Single SNP    | Healthy men and women aged $\geq$ 18 years from Iran                                            | <i>ZNT8</i> , rs13266634                                    | <i>ZNT8</i> : 8q24.11                   | <b>Tertiles for omega-3:</b><br><b>Low:</b> <0.38 %kcal<br><b>Moderate:</b> 0.38-                                                                                                                                                                | CC vs. CT+TT                                                                                                               | HDL-c<br>TG                     | <b>HDL-c:</b> Significant interaction between <i>ZNT8</i> rs13266634 genotype and omega-3 intake on the risk of low HDL-c whereby CC genotypes exhibited a decreased risk of low HDL-c with increasing intake of omega-3; this was not observed in                                                                                                                                                                                                                                                                                                                                                            |

|                        |                 |            |                                                                                                                     |                                                                                            |                        |                                                                                                                                                                                                                                                                                     |                                                                                          |                                                  |                                                                                                                                                                                                                                                                                                                                                                                                                                                                                                                                                                                                                                                                                                                                                                                                                                                                                                                          |
|------------------------|-----------------|------------|---------------------------------------------------------------------------------------------------------------------|--------------------------------------------------------------------------------------------|------------------------|-------------------------------------------------------------------------------------------------------------------------------------------------------------------------------------------------------------------------------------------------------------------------------------|------------------------------------------------------------------------------------------|--------------------------------------------------|--------------------------------------------------------------------------------------------------------------------------------------------------------------------------------------------------------------------------------------------------------------------------------------------------------------------------------------------------------------------------------------------------------------------------------------------------------------------------------------------------------------------------------------------------------------------------------------------------------------------------------------------------------------------------------------------------------------------------------------------------------------------------------------------------------------------------------------------------------------------------------------------------------------------------|
|                        |                 |            | (n=1634)                                                                                                            |                                                                                            |                        | 0.54 %kcal<br><b>High:</b> >0.54 %kcal (food)                                                                                                                                                                                                                                       |                                                                                          |                                                  | the CT+TT genotype group.<br><b>TG:</b> Significant interaction between <i>ZNT8</i> rs13266634 genotype and omega-3 intake on the risk of high TG whereby CC genotypes exhibited a decreased risk of high TG with increasing intake of omega-3; this was not exhibited in the CT+TT genotype group.                                                                                                                                                                                                                                                                                                                                                                                                                                                                                                                                                                                                                      |
| Jang et al. 2014 (12)  | Cross-Sectional | Single SNP | Adult: Men and women aged 40-69 from Korea (n=4205)<br>Children: Boys and girls aged 8-13 years from Korea (n=1548) | <i>PCSK5</i> , rs1029035                                                                   | <i>PCSK5</i> : 9q21.13 | Based on overall median intake (further detailed elsewhere (12)):<br><b>Low:</b> <0.4 %kcal (food)<br><b>High:</b> >0.4 %kcal (food)                                                                                                                                                | CC vs. CA vs. AA                                                                         | HDL-c                                            | <b>HDL-c:</b> Significant interaction between <i>PCSK5</i> rs1029035 and omega-3 on HDL-c in male children and male adults. 'C' allele carriers exhibit a tendency to decrease HDL-c with omega-3, while AA genotypes exhibit the opposite effect.                                                                                                                                                                                                                                                                                                                                                                                                                                                                                                                                                                                                                                                                       |
| Joffe et al. 2010 (13) | Cross-Sectional | Single SNP | Black women from South Africa, normal weight or with obesity (n=138)                                                | <i>TNFA</i> , rs1800629                                                                    | <i>TNFA</i> : 6p21.33  | ALA (amount not reported/cannot determine) (food)                                                                                                                                                                                                                                   | GG vs. GA+AA                                                                             | HDL-c<br>LDL-c<br>TG<br>Total-c<br>Total-c:HDL-c | <b>Total-c:HDL-c ratio:</b> Significant interaction between <i>TNFA</i> , rs1800629 genotypes and %kcal from ALA whereby increasing %kcal from ALA was associated with increases in Total-c:HDL-c for GG genotypes but decreases in Total-c:HDL-c ratio for GA+AA genotypes                                                                                                                                                                                                                                                                                                                                                                                                                                                                                                                                                                                                                                              |
| Joffe et al. 2012 (14) | Cross-Sectional | Single SNP | Black and white women from South Africa, normal weight or with obesity (n=263)                                      | <i>TNFA</i> , rs361525                                                                     | <i>TNFA</i> : 6p21.33  | <b>Median Intakes:</b><br>omega-3: 0.28-0.36 % kcal<br>ALA: 0.21-0.26 %kcal<br>EPA: 0.02 %kcal<br>DHA: 0.04-0.08 %kcal (food)                                                                                                                                                       | GG vs. GA(+AA for one participant: black, normal weight)                                 | HDL-c<br>LDL-c<br>TG<br>Total-c<br>Total-c:HDL-c | <b>LDL-c:</b> Significant interaction for Caucasian women whereby LDL-c decreased with increasing %kcal from EPA in the GG genotype but not the GA genotype of <i>TNFA</i> , rs361525.<br><b>Total-c:</b> Significant interaction for white women whereby total-c decreased with increasing EPA and DHA intakes in the GG genotype group but not the GA genotype group of <i>TNFA</i> rs361525 but individual rates were not significant.<br><b>Total-c:HDL-c ratio:</b> Significant interaction for black women whereby Total-c:HDL-c decreased within increasing %kcal from omega-3 in the GA genotype group but not GG of <i>TNFA</i> rs361525.                                                                                                                                                                                                                                                                       |
| Joffe et al. 2014 (15) | Cross-Sectional | Single SNP | Black and white women from South Africa, normal weight or with obesity (n=268)                                      | <i>IL-6</i> , -174 G>C, IVS3 (rs1800795), +281 G>T, IVS4 (rs1554606), +869 A>G (rs2069845) | <i>IL-6</i> : 7p15.3   | Black Women (%kcal/day): 0.28 omega-3, 0.21 ALA, 0.02 EPA, 0.04 DHA (normal weight); 0.36 omega-3, 0.22 ALA, 0.04 EPA, 0.08 DHA (obesity)<br>White Women (%kcal/day): 0.33 omega-3, 0.26 ALA, 0.01 EPA, 0.05 DHA (normal weight); 0.32 omega-3, 0.25 ALA, 0.02 EPA, 0.05 DHA (food) | Major allele homozygotes vs. Minor allele carriers or Comparison between three genotypes | HDL-c<br>LDL-c<br>TG<br>Total-c<br>Total-c:HDL-c | The following results were statistically significant only in white women, but not in black women <sup>3</sup> :<br><b>HDL-c:</b> Significant interaction whereby HDL-c increased with: increasing omega-3 and/or DHA and/or ALA intake in <i>IL-6</i> rs1800795 C allele carriers and increasing ALA intake in <i>IL-6</i> rs1554606 T allele carriers. HDL-c decreased with: increasing EPA and/or DHA intake in <i>IL-6</i> rs2069845 G allele carriers.<br><b>TG:</b> Significant interaction whereby TG reduced with increasing EPA intake in <i>IL-6</i> rs1800795 C allele carriers<br><b>Total-c:HDL-c:</b> Significant interaction whereby total-c:HDL-c ratio decreased with: increasing EPA intake in <i>IL-6</i> rs1800795 CC genotypes and <i>IL-6</i> rs1554606 TT genotypes, increasing DHA intake in <i>IL-6</i> rs1800795 CC genotypes, and increasing ALA intake in <i>IL-6</i> rs1554606 TT genotypes. |
| Lai et al. 2006 (16)   | Cross-Sectional | Single SNP | Men and women from the Framingham                                                                                   | <i>APOA5</i> , rs662799, rs651821, rs3135506                                               | <i>APOA5</i> : 11q23.3 | <b>Mean Intake:</b> 0.69 %kcal omega-3<br><b>Tertiles for</b>                                                                                                                                                                                                                       | Major allele homozygotes vs. Minor allele carriers                                       | TG                                               | --                                                                                                                                                                                                                                                                                                                                                                                                                                                                                                                                                                                                                                                                                                                                                                                                                                                                                                                       |

|                             |                                                                                                                         |            |                                                                                |                                                                                        |                          |                                                                                                                                                                              |                                                        |                                 |                                                                                                                                                                                                                                                                                                                                                        |
|-----------------------------|-------------------------------------------------------------------------------------------------------------------------|------------|--------------------------------------------------------------------------------|----------------------------------------------------------------------------------------|--------------------------|------------------------------------------------------------------------------------------------------------------------------------------------------------------------------|--------------------------------------------------------|---------------------------------|--------------------------------------------------------------------------------------------------------------------------------------------------------------------------------------------------------------------------------------------------------------------------------------------------------------------------------------------------------|
|                             |                                                                                                                         |            | Heart Study (n=2148)                                                           | rs2072560, rs2266788                                                                   |                          | <b>omega-3:</b><br><b>Low:</b> <0.58 %kcal<br><b>Moderate:</b> 0.58-0.74 %kcal<br><b>High:</b> >0.74 %kcal<br>(unclear if food and/or supplement sources)                    |                                                        |                                 |                                                                                                                                                                                                                                                                                                                                                        |
| Lu et al. 2010 (17)         | Cross-Sectional                                                                                                         | Single SNP | Men and women of Doetinchem Cohort Study (n=3575)                              | <i>FADS</i> , rs174546, rs482548, rs174570                                             | <i>FADS</i> : 11q12.2    | Mean intake: 0.5 %kcal (food)                                                                                                                                                | Comparison between three genotypes                     | HDL-c<br>Total-c                | <b>Total -c:</b> In high omega-3 intake group, total-c was significantly higher with each added minor 'C' allele of rs174546                                                                                                                                                                                                                           |
| Nettleton et al. 2009 (18)  | Cross-Sectional                                                                                                         | Single SNP | Men and women of Caucasian ancestry (n=8511)                                   | <i>ANGPTL4</i> E40K (rs116843064)                                                      | <i>ANGPTL4</i> : 19p13.2 | Not Reported/Cannot Determine (food)                                                                                                                                         | Minor allele carriers vs. Non-allele carriers          | HDL-c<br>TG                     | --                                                                                                                                                                                                                                                                                                                                                     |
| Richardson et al. 2011 (19) | Meta-analysis of the Framingham Offspring Study (FOS) and the Genetics of Lipid Lowering Drugs and Diet Network (GOLDN) | Single SNP | Men and women from FOS and GOLDN studies (n=3605)                              | <i>PLIN4</i> , rs8887, rs11673616, rs892158, rs7250947, rs8102428, rs1609717, rs884164 | <i>PLIN4</i> : 19p13.3   | Mean intakes:<br><b>FOS Men:</b> 1.43 g/d<br><b>FOS Women:</b> 1.37 g/d<br><b>GOLDN Men:</b> 1.83 g/d<br><b>GOLDN Women:</b> 1.48 g/d (food and supplement)                  | Minor allele carriers vs. Non-allele carriers          | TG<br>HDL-c                     | <b>TG:</b> Significant interactions for <i>PLIN4</i> , rs884164 whereby TG levels increased in minor allele carriers with higher omega-3 intake for males and females combined, and males individually.                                                                                                                                                |
| Standl et al. 2012 (20)     | Cross-Sectional Analysis (10-year time point) within a 10-year longitudinal cohort study                                | Single SNP | 10 year-old children of the GINplus and LISaplus birth cohort studies (n=1697) | <i>FADS1/FADS2</i> , rs174545, rs174546, rs174556, rs174561, rs174575, rs3834458       | <i>FADS1/2</i> : 11q12.2 | Median intake: 0.14 mg/MJ omega-3 (ALA+EPA+DPA+DHA) (food and supplement)                                                                                                    | Comparison between three genotypes                     | HDL-c<br>LDL-c<br>Total-c<br>TG | --                                                                                                                                                                                                                                                                                                                                                     |
| Tai et al. 2005 (21)        | Cross-Sectional                                                                                                         | Single SNP | Framingham Cohort, men and women (n=2106)                                      | <i>PPARA</i> , L162V (rs1800206)                                                       | <i>PPARA</i> : 22q13.31  | <b>High:</b> >0.69 %kcal<br><b>Low:</b> <0.69 %kcal (food)                                                                                                                   | <i>PPARA</i> : 162V carriers vs. 162L/162L homozygotes | TG<br>apoC-III                  | <b>TG:</b> 162V carriers had lower TG with high omega-3 intake compared to low omega-3 intake (gene-diet-interaction effects were NS)<br><b>apoC-III:</b> Significant gene-diet interactions; Higher apoC-III in 162V carriers with low omega-3 intake compared to 162V carriers with high omega-3 intake and 162L homozygotes with low omega-3 intake |
| Volcik et al. 2008 (22)     | Cross-Sectional (Baseline) Analysis within a Prospective Cohort                                                         | Single SNP | African American (n=3480) and Caucasian (n=10 134) men and women (N=13,614)    | <i>PPARA</i> , L162V (rs1800206), 3'UTR G>A (rs6008259), 3'UTR C>T (rs3892755)         | <i>PPARA</i> : 22q13.31  | African American:<br><b>High:</b> >0.32 g/d EPA+DHA<br><b>Low:</b> ≤0.32 g/d EPA+DHA<br>Caucasian:<br><b>High:</b> >0.22 g/d EPA+DHA<br><b>Low:</b> ≤0.22 g/d EPA+DHA (food) | Comparison between three genotypes for each SNP        | HDL-c<br>LDL-c<br>TG<br>Total-c | <b>Total-c, LDL-c:</b> African Americans (but not Caucasians) homozygous for <i>PPARA</i> (rs3892755) TT genotype with high EPA+DHA intake had significantly lower total-c and LDL-c compared to CT and TT genotypes (both high and low EPA+DHA intake)                                                                                                |

|                                    |                                                                    |            |                                                |                                           |                                  |                                                     |                                                             |                                                           |    |
|------------------------------------|--------------------------------------------------------------------|------------|------------------------------------------------|-------------------------------------------|----------------------------------|-----------------------------------------------------|-------------------------------------------------------------|-----------------------------------------------------------|----|
| Warodomwich<br>et al. 2009<br>(23) | Cross-sectional<br>with fasting<br>and<br>postprandial<br>measures | Single SNP | Men and<br>women of<br>GOLDN study<br>(n=1083) | <i>TCF7L2</i><br>rs7903146,<br>rs12255372 | <i>TCF7L2</i> : 10q25.2-<br>25.3 | N/A<br>(Median omega-3:<br>0.67% of kcal)<br>(food) | Major allele<br>homozygotes<br>vs.<br>Minor allele carriers | HDL-c<br>LDL-c<br>LDL-c particle<br>size<br>TG<br>Total-c | -- |
|------------------------------------|--------------------------------------------------------------------|------------|------------------------------------------------|-------------------------------------------|----------------------------------|-----------------------------------------------------|-------------------------------------------------------------|-----------------------------------------------------------|----|

ALA: alpha-linolenic acid, Apo: apolipoprotein, DHA: docosahexaenoic acid, EPA: eicosapentaenoic acid, HDL: high-density lipoprotein cholesterol, LDL: low-density lipoprotein cholesterol, N/A: not applicable, NS: Non-significant, sdLDL-c: small, dense, low-density lipoprotein cholesterol, SNP: single nucleotide polymorphism, TG: triglycerides

1. Intakes are total omega-3 unless otherwise specified

2. All other (not listed) gene/omega-3/lipid/lipoprotein results of interest to the present review were NS

Participants are described as "healthy" for studies that incorporated exclusion criteria for certain conditions, blood lipid levels, etc. and when studies described the population as "healthy."

3. These results were taken from the full-text manuscript's summary table of IL-6 results. Refer to Supplementary Tables S8-S13 in Joffe et al. 2014 (15) for several other significant results, stratified and un-stratified by ethnicity. Note: There were no corrections for multiple testing in the statistical analyses.

'--' indicates that all of the completed gene/omega-3/lipid/lipoprotein analyses were NS

\*Human *APOE* is polymorphic at two single nucleotides (rs429358 and rs7412) resulting in three different alleles ( $\epsilon$ 2,  $\epsilon$ 3 and  $\epsilon$ 4)



Supplemental Table 3: Summary of interventional studies

| Author, Year              | Study Design                                  | Genetic Approach         | Population (sample size included in analyses)               | Intervention Duration | Gene(s), SNP(s)                                                                                                                                                                                                                                                                                                                                                              | Cytogenic Location of Gene(s)                                                                                                                                                                                                                                                                                                            | Quantity, Source and Type of Omega-3                                                                                                          | Comparators                                                                                                                                                                                                                                 | Plasma Lipid/ Lipoprotein Outcome(s)             | Summary of Statistically Significant Study Findings Relevant to the Research Question <sup>1</sup>                                                                                          |
|---------------------------|-----------------------------------------------|--------------------------|-------------------------------------------------------------|-----------------------|------------------------------------------------------------------------------------------------------------------------------------------------------------------------------------------------------------------------------------------------------------------------------------------------------------------------------------------------------------------------------|------------------------------------------------------------------------------------------------------------------------------------------------------------------------------------------------------------------------------------------------------------------------------------------------------------------------------------------|-----------------------------------------------------------------------------------------------------------------------------------------------|---------------------------------------------------------------------------------------------------------------------------------------------------------------------------------------------------------------------------------------------|--------------------------------------------------|---------------------------------------------------------------------------------------------------------------------------------------------------------------------------------------------|
| AbuMweis et al. 2018 (24) | Randomized, Crossover Controlled Intervention | Single SNP*              | Adults with at least one cardiovascular risk factor (n=129) | 4 weeks               | <i>FADS1</i> , rs174561<br><i>FADS2</i> , rs174583<br><i>ELOVL2</i> , rs953413<br><i>ELOVL5</i> , rs2397142<br><i>CETP</i> , rs5882<br><i>SCD1</i> , rs2234970,<br><i>PPARα</i> , rs6008259<br><i>LIPF</i> , rs814628<br><br>and<br><i>APOE</i> , rs429358, rs7412                                                                                                           | <i>FADS1/2</i> : 11q12.2<br><i>ELOVL2</i> : 6p24.2<br><i>ELOVL5</i> : 6p12.1<br><i>CETP</i> : 16q13<br><i>SCD1</i> : 10q24.31<br><i>PPARα</i> : 22q13.31<br><i>LIPF</i> : 10q23.31<br><i>APOE</i> : 19q13.32                                                                                                                             | Intake range: 1.0 – 2.5 g/day DHA (supplement)                                                                                                | Comparison between three genotypes for each single SNP (except <i>PPARα</i> and <i>LIPF</i> whereby analyses were major allele homozygotes vs. minor allele carriers)<br><br>and<br><i>APOE</i> -E2 vs. <i>APOE</i> -E3 vs. <i>APOE</i> -E4 | apoA1<br>apoB<br>HDL-c<br>LDL-c<br>TG<br>Total-c | --                                                                                                                                                                                          |
| Alsaleh et al. 2014 (25)  | Randomized Controlled Intervention            | Single SNP and Polygenic | Healthy men and women (n=310)                               | 12 months             | <i>CETP</i> , rs3764261,<br><i>LIPC</i> , rs1532085<br><i>APOB</i> , rs1367117<br><i>ABCG5/ABCG8</i> , rs4299376<br><i>TIMD4/HAVCR1</i> , rs6882076<br><i>GCKR</i> , rs1260326<br><i>TRIB1</i> , rs2954029<br><i>ANGPTL3/DOCK7</i> , rs2131925<br><i>FADS1/2/3</i> , rs174546<br><i>GALNT2</i> , rs4846914<br><i>ABCA1</i> , rs4149268<br><i>APOE/APOC1/APOC2</i> , rs439401 | <i>CETP</i> : 16q13<br><i>LIPC</i> : 15q21.3<br><i>APOB</i> : 2p24.1<br><i>ABCG5/ABCG8</i> : 2p.21<br><i>TIMD4/HAVCR1</i> : 5q33.3<br><i>GCKR</i> : 2p23.3<br><i>TRIB1</i> : 8q24.13<br><i>ANGPTL3/DOCK7</i> : 1p31.3<br><i>FADS</i> : 11q12.2<br><i>GALNT2</i> : 1q42.13<br><i>ABCA1</i> : 9q31.1<br><i>APOE/APOC1/APOC2</i> : 19q13.32 | <b>Low Dose:</b> 0.5 g/day EPA and DHA<br><b>Moderate Dose:</b> 0.9 g/day EPA and DHA<br><b>High Dose:</b> 1.8 g/day EPA and DHA (supplement) | Effect sizes per GRS risk allele after omega-3 treatment <i>and</i> Risk allele carriers vs. non-risk allele carriers                                                                                                                       | HDL-c<br>LDL-c<br>TG<br>Total-c                  | <b>TG:</b> significant interaction whereby 1.8 g/day EPA and DHA significantly reduced TG in T allele carriers (21.6% reduction) vs. CC genotypes (3.5% reduction) of <i>FADS1</i> rs174546 |

|                                   |                                                          |                                    |                                                |         |                                                                                                                                                                                                          |                                                                                                                                                                                |                                                                                                                    |                                                                                                                                           |                                                                                                                     |                                                                                                                                                                                                                                                                                                                                                                                                                                                                                                                                |
|-----------------------------------|----------------------------------------------------------|------------------------------------|------------------------------------------------|---------|----------------------------------------------------------------------------------------------------------------------------------------------------------------------------------------------------------|--------------------------------------------------------------------------------------------------------------------------------------------------------------------------------|--------------------------------------------------------------------------------------------------------------------|-------------------------------------------------------------------------------------------------------------------------------------------|---------------------------------------------------------------------------------------------------------------------|--------------------------------------------------------------------------------------------------------------------------------------------------------------------------------------------------------------------------------------------------------------------------------------------------------------------------------------------------------------------------------------------------------------------------------------------------------------------------------------------------------------------------------|
| Armstrong et al. 2012 (26)        | Double-Blind, Placebo-Controlled Randomized Intervention | Single SNP (deletion polymorphism) | Healthy adults of African ancestry (n=98)      | 6 weeks | <i>ALOX5</i> , dd (33, 34 or 44), d5 (35, 45) and 55 (control) genotypes                                                                                                                                 | <i>ALOX5</i> : 10q11.21                                                                                                                                                        | Fish oil: 5.0 g/day containing 2.0 g/day EPA and 1.0 g/day DHA<br>Control oil: 5.0 g/day corn/soy oil (supplement) | dd vs. d5 vs. 55                                                                                                                          | TG<br>Mean lipoprotein particle diameter, total number of particles and particle concentration for: HDL-c and LDL-c | <b>TG</b> : significant interaction whereby decreases in TG from omega-3 supplementation were specific to d5 genotype group<br><b>HDL-c particle concentration</b> : significant decrease with omega-3 intervention in the d5 and 55 genotype groups compared to placebo, but no decreases in the dd genotype group<br><b>Medium HDL-c particles and HDL-c (mmol/L)</b> : significant gene-treatment interaction but no significant differences after post-hoc analysis for comparisons among genotypes                        |
| Binia et al. 2017 (27)            | Single-Arm Clinical Trial                                | Single SNP                         | Mexican adults 18-40 years (n=191)             | 6 weeks | <i>PPARα</i> , L162V (rs1800206), <i>PPARγ2</i> , P12A (rs1801282)                                                                                                                                       | <i>PPARα</i> : 22q13.31<br><i>PPARγ2</i> : 3p25.2                                                                                                                              | Fish oil: 2.7 g/day containing 1.9 g/d EPA and 0.8 g/day DHA (supplement)                                          | Major allele homozygotes vs. Minor allele carriers                                                                                        | HDL-c<br>LDL-c<br>TG<br>Total-c                                                                                     | <b>LDL-c</b> : significant increase in LDL-c among minor allele carriers ( <i>PPARγ2</i> Pro12Ala and Ala12Ala) only vs. <i>PPARγ2</i> Pro12Pro genotypes only for individuals with BMI>25.0 kg/m <sup>2</sup><br><b>Total-c</b> : significant increase in total-c among minor allele carriers ( <i>PPARγ2</i> Pro12Ala and Ala12Ala) only vs. <i>PPARγ2</i> Pro12Pro genotypes only for individuals with BMI>25.0 kg/m <sup>2</sup>                                                                                           |
| Bouchard Mercier et al. 2013 (28) | Single Arm Clinical Trial                                | Single SNP                         | Healthy adults aged 18-50 years (n=208)        | 6 weeks | <i>SREBF1</i> , rs4925115, rs4925118, rs12953299<br><i>ACLY</i> , rs8071753, rs8065502, rs2304497<br><i>ACACA</i> rs2017571, rs29221368, rs9906044, rs2229416, rs1714987, rs1266175, rs3815059, rs829165 | <i>SREBF1</i> : 17p11.2<br><i>ACLY</i> : 17q21.2<br><i>ACACA</i> : 17q12                                                                                                       | Fish oil: 5.0 g/day containing 1.9-2.2 g/day EPA and 1.1 g/day DHA (supplement)                                    | Major allele homozygotes vs. Minor allele carriers<br>or<br>Comparison between three genotypes (when minor allele frequencies were >0.05) | TG                                                                                                                  | <b>TG</b> : Significant gene-diet interaction whereby individuals with the GG genotype of <i>ACLY</i> rs8071753 and individuals with the GG or CG genotype of <i>ACACA</i> rs1714987 exhibited greater TG lower effects following omega-3 supplementation; these two SNPs explained approximately 8% of the variance in plasma TG responses to omega-3 supplementation. There were significant differences in non-responder frequencies of <i>ACLY</i> rs8071753 for responders and non-responders to omega-3 for TG lowering. |
| Bouchard-Mercier et al. 2014 (29) | Single Arm Clinical Trial                                | Single SNP                         | Healthy men and women aged 18-50 years (n=208) | 6 weeks | <i>RXRA</i> (12 SNPs), <i>CPT1A</i> (9 SNPs), <i>ACADVL</i> (1 SNP), <i>ACAA2</i> (6 SNPs), <i>ABCD2</i> (8 SNPs), <i>ACOX1</i> (8 SNPs), <i>ACAA1</i> (3 SNPs) [outlined in Supplementary Table 5]      | <i>RXRA</i> : 9q34.2<br><i>CPT1A</i> : 11q13.3<br><i>ACADVL</i> : 17p13.1<br><i>ACAA2</i> : 18q21.1<br><i>ABCD2</i> : 12q12<br><i>ACOX1</i> : 17q25.1<br><i>ACAA1</i> : 3p22.2 | Fish oil: 5.0 g/day containing 1.9-2.2 g/day EPA and 1.1 g/day DHA (supplement)                                    | Major allele homozygotes vs. Minor allele carriers<br>or<br>Comparison between three genotypes (when minor allele frequencies were >0.05) | TG                                                                                                                  | <b>TG</b> : There were significant gene-diet interaction effects on TG responses to omega-3 for <i>RXRA</i> rs11185660 genotype dependent on total fat intake, <i>RXRA</i> rs10881576, rs12339187 and rs11185660 genotypes dependent on saturated fat intake, and <i>ACOX1</i> rs17583163 dependent on total polyunsaturated fat intake                                                                                                                                                                                        |
| Bouchard-Mercier et al. 2014 (30) | Single Arm Clinical Trial                                | Single SNP                         | Healthy men and women aged 18-50 years (n=208) | 6 weeks | <i>GCK</i> (13 SNPs) [outlined in Supplementary Table 5]                                                                                                                                                 | <i>GCK</i> : 7p13                                                                                                                                                              | Fish oil: 5.0 g/day containing 1.9-2.2 g/day EPA and 1.1 g/day DHA (supplement)                                    | Major allele homozygotes vs. Minor allele carriers<br>or<br>Comparison between three genotypes                                            | TG                                                                                                                  | <b>TG</b> : CC genotypes of <i>GCK</i> rs741038 exhibited significantly greater TG reduction in response to omega-3 when their carbohydrate intake was high (>48.6%kcal) compared to those with the CC genotype of rs741038 with low carbohydrate intake (≤48.6%kcal) and compared to CT or TT genotypes with either high or low carbohydrate intake.                                                                                                                                                                          |

|                                 |                                                                      |             |                                                              |                  |                                                                        |                         |                                                                                                                                                                                                                                                                                                            | (when minor allele frequencies were >0.05)                                       |                                                                        |                                                                                                                                                                                                                                                                                                     |
|---------------------------------|----------------------------------------------------------------------|-------------|--------------------------------------------------------------|------------------|------------------------------------------------------------------------|-------------------------|------------------------------------------------------------------------------------------------------------------------------------------------------------------------------------------------------------------------------------------------------------------------------------------------------------|----------------------------------------------------------------------------------|------------------------------------------------------------------------|-----------------------------------------------------------------------------------------------------------------------------------------------------------------------------------------------------------------------------------------------------------------------------------------------------|
| Caron-Dorval et al. 2008 (31)   | Single Arm Clinical Trial                                            | Single SNP  | Healthy men of Caucasian ancestry aged 18-55 years (n=28)    | 6 weeks          | <i>PPARA</i> , L162V (rs1800206)                                       | <i>PPARA</i> : 22q13.31 | Fish oil: 5.0 g/day containing 1.9 g/day EPA and 1.1 g/day DHA (supplement)                                                                                                                                                                                                                                | V162 carriers vs. non-carriers                                                   | apoB-100<br>HDL-c<br>LDL-c<br>TG<br>Total-c<br>Total-C:HDL-c           | --                                                                                                                                                                                                                                                                                                  |
| Carvalho-Wells et al. 2012 (32) | Sequential Non-Randomized, Cross-Over Dietary Intervention           | Single SNP* | Healthy men and women aged 35-70 years (n=88)                | 8 weeks per diet | <i>APOE</i> , rs429358, rs7412                                         | <i>APOE</i> : 19q13.32  | <b>Low-Fat:</b><br>4.0 mg/day EPA, 10.6 mg/d DPA, 11.7 mg/d DHA<br><b>High-SFA:</b><br>20.2 mg/d EPA, 27.1 mg/d DPA, 15.4 mg/d DHA<br><b>High-SFA+DHA:</b><br>524.3 mg/d EPA, 215.5 mg/d DPA, 3017.3 mg/d DHA [actual intakes reported (33)] (supplemental DHA for High-SFA+DHA; others from food sources) | <i>APOE</i> -E3/3 vs. <i>APOE</i> -E3/4                                          | apoB<br>apoC-III<br>apoE<br>HDL-c<br>LDL-c<br>sdLDL-c<br>TG<br>Total-c | <b>TG:</b> Significant diet x genotype interaction for TG; greater TG lowering response to high-SFA+DHA diet in <i>APOE</i> -E3/4 carriers (compared to high-SFA diet alone)                                                                                                                        |
| Caslake et al. 2008 (34)        | Double-Blind, Randomized, Placebo-Controlled, Crossover Intervention | Single SNP* | Healthy men and women aged 20-70 years (n=312)               | 8 weeks per diet | <i>APOE</i> , rs429358, rs7412                                         | <i>APOE</i> : 19q13.32  | Control oil: 0.0 g/d EPA and DHA<br>Fish oil: 0.7 g/d EPA and DHA<br>Fish oil: 1.8 g/d EPA and DHA (supplement)                                                                                                                                                                                            | <i>APOE</i> -E2/E2 + E2/E3 vs. <i>APOE</i> -E3/E3 vs. <i>APOE</i> -E3/E4 + E4/E4 | HDL-c<br>LDL-c<br>TG<br>Total-c                                        | <b>TG:</b> Significant interaction between treatment x sex x genotype whereby <i>APOE</i> -E3/E4 + E4/E4 males exhibited the greatest TG reductions with both 0.7 g/d EPA and DHA as well as 1.8 g/d EPA and DHA compared to other genotypes                                                        |
| Cormier et al. 2012 (35)        | Single Arm Clinical Trial                                            | Single SNP  | Healthy men and women aged 18-50 years (n=208)               | 6 weeks          | <i>FADS</i> gene cluster (19 SNPs) [outlined in Supplementary Table 5] | <i>FADS</i> : 11q12.2   | Fish oil: 5.0 g/day containing 1.9 g/day EPA and 1.1 g/day DHA (supplement)                                                                                                                                                                                                                                | Major allele homozygotes vs. Minor allele carriers                               | TG                                                                     | --                                                                                                                                                                                                                                                                                                  |
| Dang et al. 2015 (36)           | Single Arm Clinical Trial                                            | Single SNP* | Healthy men and women aged 20-35 years (n=80)                | 4 weeks          | <i>APOE</i> , rs429358, rs7412                                         | <i>APOE</i> : 19q13.32  | Fish oil containing 900 mg EPA and 680 mg DHA (supplement)                                                                                                                                                                                                                                                 | <i>APOE</i> -E4+ vs. <i>APOE</i> -E4-                                            | HDL-c<br>LDL-c<br>TG<br>Total-c                                        | --                                                                                                                                                                                                                                                                                                  |
| Dawczynski et al. 2013 (37)     | Randomized, Placebo-Controlled, Double-Blind Intervention            | Single SNP  | Men and women with TG ≥ 1.7 mmol/L, otherwise healthy (n=47) | 10 weeks         | <i>CD36</i> , rs1761667, rs1049673                                     | <i>CD36</i> : 7q21.11   | Yogurt with lower dose fish oil: 0.8g/day omega-3 containing 0.01g ALA, 0.44g EPA, 0.06g DPA and 0.31g DHA (fish oil)<br><br>Yogurt with higher dose fish oil: 3.0 g/day omega-3                                                                                                                           | Comparison between three genotypes                                               | HDL-c<br>TG                                                            | <b>HDL-c:</b> In response to omega-3 supplementation (0.8-3.0 g/day), HDL-c increased in GA genotype of <i>CD36</i> rs1761667 and CG genotype of <i>CD36</i> rs1049673.<br><b>TG:</b> In response to omega-3 supplementation (0.8-3.0 g/day), TG decreased in GA genotype of <i>CD36</i> rs1761667. |

|                           |                                                                 |                              |                                                                                         |                                  |                                                                                                                                |                                                                               |                                                                                                                                                           |                                                                                                                                                                                                                                                                                    |                                                                                             |                                                                                                                                                                                                                                                                                                                                                                                             |
|---------------------------|-----------------------------------------------------------------|------------------------------|-----------------------------------------------------------------------------------------|----------------------------------|--------------------------------------------------------------------------------------------------------------------------------|-------------------------------------------------------------------------------|-----------------------------------------------------------------------------------------------------------------------------------------------------------|------------------------------------------------------------------------------------------------------------------------------------------------------------------------------------------------------------------------------------------------------------------------------------|---------------------------------------------------------------------------------------------|---------------------------------------------------------------------------------------------------------------------------------------------------------------------------------------------------------------------------------------------------------------------------------------------------------------------------------------------------------------------------------------------|
|                           |                                                                 |                              |                                                                                         |                                  |                                                                                                                                |                                                                               | containing 0.07g ALA, 1.59g EPA, 0.23g DPA and 1.12g DHA (fish oil)<br><br>Control yogurt: commercial whole fruit yogurt with 3.5% milk fat<br><br>(food) |                                                                                                                                                                                                                                                                                    |                                                                                             |                                                                                                                                                                                                                                                                                                                                                                                             |
| Ferguson et al. 2010 (38) | Randomized Intervention and Cross-Sectional (Baseline) Analysis | Single SNP                   | Men and women with metabolic syndrome from LIPGENE cohort (n=450)                       | 12 weeks                         | <i>NOS3</i> , rs11771443, rs1800783, rs1800779, rs1799983, rs3918227, rs743507                                                 | <i>NOS3</i> : 7q36.1                                                          | 1.24 g/d EPA+DHA supplement (intervention); quantity of omega-3 not reported for observational analyses                                                   | Major allele homozygotes vs. Minor allele carriers                                                                                                                                                                                                                                 | apoA-1<br>apoB<br>apoB-48<br>apoC-II<br>apoC-III<br>apoE<br>HDL-c<br>LDL-c<br>TG<br>Total-c | <b>TG:</b> For <i>NOS3</i> rs1799983 minor-allele (A) carriers only, the observational analysis indicated higher TG with lower EPA+DHA intake (and lower TG with higher EPA+DHA intake). Post-intervention with omega-3 supplementation indicated that only minor-allele (A) carriers exhibited significant TG reduction (accompanied by increases in plasma omega-3).                      |
| Harsløf et al. 2014 (39)  | Randomized, Controlled Intervention                             | Single SNP and Genetic Score | Infants of Danish ancestry (n=133)                                                      | 9 months                         | <i>PPARγ2</i> , Pro12Ala (rs1801282), <i>FADS1</i> , rs1535, rs174575, <i>FADS3</i> , rs174448, <i>COX2</i> , rs5275, rs689466 | <i>PPARγ2</i> : 3p25.2<br><i>FADS</i> : 11q12.2<br><i>COX2</i> : 1q25.2-q25.3 | 5.0 mL/day fish oil (median reported intake: 3.8 g/day containing 630 mg/day EPA and 620 mg/day DHA) (supplement)                                         | <i>PPARγ2</i> genotype analyses were by major allele homozygotes vs. heterozygotes<br><br>and<br><br><i>FADS</i> genotype analyses were by the number of DHA-increasing alleles<br><br>and<br><br><i>COX2</i> genotype analyses were by major allele homozygotes vs. heterozygotes | HDL-c<br>LDL-c<br>TG<br>Total-c                                                             | <b>TG:</b> <i>PPARγ2</i> heterozygotes exhibited reduced TG in response to omega-3 when compared to <i>PPARγ2</i> heterozygotes in the control (sunflower oil) group                                                                                                                                                                                                                        |
| Itariu et al. 2012 (40)   | Randomized, Controlled Intervention                             | Single SNP                   | Men and women without diabetes with a BMI ≥40 kg/m <sup>2</sup> aged 20-65 years (n=55) | 8 weeks                          | <i>PPARγ2</i> , Pro12Ala (rs1801282)                                                                                           | <i>PPARγ2</i> : 3p25.2                                                        | Fish oil containing 3.4 g/day EPA + DHA (supplement)                                                                                                      | <i>PPARγ2</i> , Ala12 carriers vs. Pro12Pro                                                                                                                                                                                                                                        | apoB<br>HDL-c<br>LDL-c<br>TG<br>Total-c                                                     | <b>apoB:</b> Significant increases in apoB with omega-3 intervention in Ala12 carriers when compared to Pro12 carriers.<br><b>Total-c:</b> Significant interaction effect whereby increases in total-c were exhibited with omega-3 intervention in Ala12 carriers when compared to the Pro12Pro genotype.                                                                                   |
| Jackson et al. 2012 (41)  | Non-Randomized Intervention                                     | Single SNP*                  | Healthy men aged 35-70 years (n=23)                                                     | 8 weeks and 480-min postprandial | <i>APOE</i> , rs429358, rs7412                                                                                                 | <i>APOE</i> : 19q13.32                                                        | Fish oil containing 3.45 g/day DHA (supplement)                                                                                                           | <i>APOE</i> -E3/3 vs. <i>APOE</i> -E3/4                                                                                                                                                                                                                                            | apoB<br>apoC-III<br>apoE<br>HDL-c<br>LDL-c<br>TG                                            | <b>TG:</b> <i>APOE</i> -E3/E4 exhibited reduced fasting TG in response to a high saturated fat + DHA intervention when compared to the high saturated fat diet alone. There was also a significant interaction (meal x time x genotype) for the postprandial TG lowering response whereby <i>APOE</i> -E3/4 consuming a high saturated fat + DHA intervention exhibited significantly lower |

|                           |                                     |             |                                                                     |                      |                                                                                                                                                             |                                                                                                                          |                                                                                                                                                                                 |                                                                                                                                  | Total-c                             | postprandial TG, TG area under the curve, and TG maximum concentration compared to those consuming the high saturated fat diet alone.                                                                                                                                                                                                                                                                                                                                                                                                                                                                                                                                                                                                                                                         |
|---------------------------|-------------------------------------|-------------|---------------------------------------------------------------------|----------------------|-------------------------------------------------------------------------------------------------------------------------------------------------------------|--------------------------------------------------------------------------------------------------------------------------|---------------------------------------------------------------------------------------------------------------------------------------------------------------------------------|----------------------------------------------------------------------------------------------------------------------------------|-------------------------------------|-----------------------------------------------------------------------------------------------------------------------------------------------------------------------------------------------------------------------------------------------------------------------------------------------------------------------------------------------------------------------------------------------------------------------------------------------------------------------------------------------------------------------------------------------------------------------------------------------------------------------------------------------------------------------------------------------------------------------------------------------------------------------------------------------|
| Jackson et al. 2017 (42)  | Non-Randomized Intervention         | Single SNP* | Healthy men aged 35-70 years (n=23)                                 | 480-min postprandial | <i>APOE</i> , rs429358, rs7412                                                                                                                              | <i>APOE</i> : 19q13.32                                                                                                   | Fish oil containing 3.45 g/day DHA (supplement)                                                                                                                                 | <i>APOE</i> -E3/3 vs. <i>APOE</i> -E3/4                                                                                          | apoB-48<br>apoB-100                 | --                                                                                                                                                                                                                                                                                                                                                                                                                                                                                                                                                                                                                                                                                                                                                                                            |
| Lindi et al. 2003 (43)    | Randomized Intervention             | Single SNP  | Healthy men and women aged 30-65 years (n=150)                      | 3 months             | <i>PPAR</i> $\gamma$ 2, Pro12Ala (rs1801282)                                                                                                                | <i>PPAR</i> $\gamma$ 2: 3p25.2                                                                                           | Fish oil containing 2.4 g/d EPA + DHA (supplement)                                                                                                                              | <i>PPAR</i> $\gamma$ 2, Ala12 carriers vs. Pro12Pro                                                                              | HDL-c<br>LDL-c<br>TG<br>Total-c     | <b>TG:</b> Compared to Pro12Pro, Ala12 carriers exhibited significantly greater TG reductions in response to omega-3 supplementation only when total fat intake was $\leq$ 37 %kcal or SFA intake was $\leq$ 10 %kcal                                                                                                                                                                                                                                                                                                                                                                                                                                                                                                                                                                         |
| Lindman et al. (44)       | Randomized, Controlled Intervention | Single SNP  | Men at high risk of cardiovascular disease aged 65-75 years (n=204) | 6 months             | <i>FVII</i> , rs6046                                                                                                                                        | <i>FVII</i> : 13q34                                                                                                      | Fish oil containing 2.4 g/d EPA + DHA<br><br>Dietary advice including recommendations to increase omega-3 (supplement and food)                                                 | Major allele homozygotes vs. Minor allele carriers                                                                               | TG                                  | --                                                                                                                                                                                                                                                                                                                                                                                                                                                                                                                                                                                                                                                                                                                                                                                            |
| Madden et al. 2008 (45)   | Non-Randomized Intervention         | Single SNP  | Healthy men aged 43-84 years (n=111)                                | 12 weeks             | <i>CD36</i> , rs1527483, rs1049673, rs1761667, rs1984112                                                                                                    | <i>CD36</i> : 7q21.11                                                                                                    | Fish oil containing 1.02 g/d EPA and 0.69 g/d DHA (supplement)                                                                                                                  | For each SNP: AA vs. AG vs. GG                                                                                                   | HDL-c<br>LDL-c<br>LDL-c:HDL-c<br>TG | <b>TG:</b> In response to omega-3 supplementation, TG significantly reduced only in individuals with the GG genotype, for each SNP individually (i.e. for rs1527483, rs1049673, rs1761667 and rs1984112 individually)<br><b>LDL-c:</b> In response to omega-3 supplementation, LDL-c increased only in individuals with the rs1761667 AA genotype as well as for individuals with the rs1984112 AA genotype<br><b>HDL-c:</b> In response to omega-3 supplementation, HDL-c significantly increased in individuals with rs1761667 AA or AG as well as for individuals with the CC or CG genotype for either rs1984112, rs1527483 and/or rs1049673; NOTE: rs1527483 results should be interpreted with caution due to low sample sizes for AA and AG genotypes thus reducing statistical power) |
| Markovic et al. 2004 (46) | Single-Arm Clinical Trial           | Single SNP  | Healthy men (n=159)                                                 | 12 weeks             | <i>TNF</i> $\alpha$ , -308 (rs1800629)<br><i>LT</i> - $\alpha$ , +252 (rs909253)<br><i>IL</i> -1 $\beta$ , -511 (rs16944)<br><i>IL</i> -6, -174 (rs1800795) | <i>TNF</i> $\alpha$ : 6p21.33<br><i>LT</i> - $\alpha$ : 6p21.33<br><i>IL</i> -1 $\beta$ : 2q14.1<br><i>IL</i> -6: 7p15.3 | Fish oil containing 1.8 g/d EPA+DHA (supplement)                                                                                                                                | Major allele homozygotes vs. Minor allele carriers<br>or<br>Comparison between three genotypes (depending on allele frequencies) | TG                                  | <b>TG:</b> Significant negative correlation between pre-supplementation TG and change of TG during omega-3 supplementation for all genotypes of genes studied except for <i>LT</i> - $\alpha$ rs909253 GG genotype and <i>IL</i> -1 $\beta$ rs16944 TT genotype. In <i>LT</i> - $\alpha$ rs909253 AA genotype and <i>TNF</i> $\alpha$ rs1800629 AA genotype, significant association between BMI (divided in tertiles) and TG changes.                                                                                                                                                                                                                                                                                                                                                        |
| McColley et al. 2011 (47) | Crossover Intervention              | Single SNP  | Healthy post-menopausal women (n=16)                                | 8 weeks per diet     | <i>FABP</i> 2, rs1799883                                                                                                                                    | <i>FABP</i> 2: 4q26                                                                                                      | <b>High-Fat:</b> 50 %kcal from dietary fat<br><b>Low-Fat:</b> 20 %kcal from dietary fat<br><b>Low-Fat + omega-3:</b> 23% kcal from dietary fat with 3 %kcal from omega-3 (food) | Major allele homozygotes vs. Minor allele carriers                                                                               | TG                                  | --                                                                                                                                                                                                                                                                                                                                                                                                                                                                                                                                                                                                                                                                                                                                                                                            |

|                               |                                                                      |             |                                                                                  |                                              |                                                                                                            |                                                                          |                                                                                                                         |                                                                                                                            |                                                              |                                                                                                                                                                                                                                                                                                                                                                                                                                                                                                                                                                                                                                                                                                                                                                       |
|-------------------------------|----------------------------------------------------------------------|-------------|----------------------------------------------------------------------------------|----------------------------------------------|------------------------------------------------------------------------------------------------------------|--------------------------------------------------------------------------|-------------------------------------------------------------------------------------------------------------------------|----------------------------------------------------------------------------------------------------------------------------|--------------------------------------------------------------|-----------------------------------------------------------------------------------------------------------------------------------------------------------------------------------------------------------------------------------------------------------------------------------------------------------------------------------------------------------------------------------------------------------------------------------------------------------------------------------------------------------------------------------------------------------------------------------------------------------------------------------------------------------------------------------------------------------------------------------------------------------------------|
| Minihane et al. 2000 (48)     | Double-Blind, Randomized, Placebo-Controlled, Crossover Intervention | Single SNP* | Healthy men aged 30-70 years at risk of atherogenic lipoprotein phenotype (n=50) | 6 weeks per diet and 480 minute postprandial | <i>APOE</i> , rs429358, rs7412                                                                             | <i>APOE</i> : 19q13.32                                                   | Fish oil containing 3.0 g/d EPA and DHA. Control oil: 6.0 g/d olive oil capsule (supplement)                            | <i>APOE</i> -E2/E3 vs. <i>APOE</i> -E3/E3 vs. <i>APOE</i> -E3/E4 + E4/E4                                                   | HDL-c<br>LDL-c<br>TG<br>Total-c<br>Total-c:HDL               | <b>TG</b> : Postprandial: Significantly greater reduction in TG incremental area under postprandial TG curve in <i>APOE</i> -E2/E3 relative to other <i>APOE</i> genotype categories<br><b>Total-c</b> : 6-week: <i>APOE</i> -E3/E4 + E4/E4 genotype group exhibited significantly different changes in total-c (increase), relative to other <i>APOE</i> genotypes, whereby reductions in total-c occurred                                                                                                                                                                                                                                                                                                                                                           |
| Olano-Martin et al. 2010 (49) | Randomized, Cross-Over Intervention                                  | Single SNP* | Healthy normolipidemic men (n=38)                                                | 4 weeks per diet                             | <i>APOE</i> , rs429358, rs7412                                                                             | <i>APOE</i> : 19q13.32                                                   | EPA-rich fish oil: 3.3 g/d EPA<br>DHA-rich fish oil: 3.7 g/d DHA<br>Control oil: 80:20 palm olein:soyabean (supplement) | <i>APOE</i> -E3/3 vs. <i>APOE</i> -E3/4 (carriers)                                                                         | apoB<br>apoE<br>HDL-c<br>LDL-c<br>TG<br>TG:HDL-c<br>Total-c  | <b>apoB, LDL-c</b> : In <i>APOE</i> -E4 carriers only, DHA-rich oil treatment resulted in significant increases in apoB and LDL-c<br><b>TG</b> : Significant reduction in TG in response to both EPA and DHA in <i>APOE</i> -E3/E3 group; significant reduction in TG in <i>APOE</i> -E4 carriers with EPA only. No significant interactions.<br><b>Total-c</b> : Significant genotype x treatment interaction whereby <i>APOE</i> -E4 carriers exhibit total-c reductions in response to EPA-rich oil.                                                                                                                                                                                                                                                               |
| Ouellette et al. 2013 (50)    | Single-Arm Clinical Trial                                            | Single SNP  | Healthy men and women aged 18-50 (n=210)                                         | 6 weeks                                      | <i>GPAM</i> (3 SNPs), <i>AGPAT3</i> (13 SNPs), <i>AGPAT4</i> (35 SNPs) [outlined in Supplementary Table 5] | <i>GPAM</i> : 10q25.2<br><i>AGPAT3</i> : 21q22.3<br><i>AGPAT4</i> : 6q26 | Fish oil containing 1.9-2.2 g/d EPA + 1.1 g/d DHA (supplement)                                                          | Major allele homozygotes vs. Minor allele carriers or Comparison between three genotypes (depending on allele frequencies) | HDL-c<br>LDL-c<br>TG<br>Total-c                              | <b>LDL-c</b> : Significant <i>GPAM</i> , rs2792751 genotype x supplementation interaction on LDL-c<br><b>TG</b> : Significant genotype x supplementation interaction on TG for <i>GPAM</i> , rs2792751 and rs17129561 as well as <i>AGPAT4</i> , rs9458172 and rs3798943                                                                                                                                                                                                                                                                                                                                                                                                                                                                                              |
| Ouellette et al. 2014 (51)    | Single-Arm Clinical Trial                                            | Single SNP  | Healthy men and women 18-50 years (n=208)                                        | 6 weeks                                      | <i>MGLL</i> (18 SNPs) [outlined in Supplementary Table 5]                                                  | <i>MGLL</i> : 3q21.3                                                     | Fish oil containing 1.9-2.2 g/d EPA + 1.1 g/d DHA (supplement)                                                          | Major allele homozygotes vs. Minor allele carriers or Comparison between three genotypes (depending on allele frequencies) | apoB<br>HDL-c<br>LDL-c<br>LDL particle size<br>TG<br>Total-c | <b>LDL-c</b> : Significant interactions for <i>MGLL</i> rs6776142, rs555183, rs782444, rs6787155 and rs1466571 whereby omega-3 supplementation modulated LDL-c levels; rs782444 and rs555183 minor allele homozygotes more likely to be negative responders to omega-3 supplementation (i.e. exhibit reduced LDL-c); rs6780384, rs782444 and rs6787155 major allele homozygotes more likely to be negative responders to omega-3 supplementation<br><b>LDL particle size</b> : Significant interactions for <i>MGLL</i> rs782440, rs13076543 and rs9877819 whereby omega-3 supplementation modulated LDL particle size; rs549662 minor allele homozygotes more likely to be positive responders to omega-3 supplementation (i.e. exhibit increased LDL particle size) |
| Paschos et al. 2005 (52)      | Single-Arm Clinical Trial                                            | Single SNP* | Men with dyslipidemia, aged 35 to 67 years (n=50)                                | 12 weeks                                     | <i>APOE</i> , rs429358, rs7412                                                                             | <i>APOE</i> : 19q13.32                                                   | 8.1 g/day ALA (via 15 ml of Flaxseed oil supplementation)                                                               | <i>APOE</i> -E2/E3 vs. <i>APOE</i> -E3/E3 vs. <i>APOE</i> -E3/E4                                                           | ApoA-I<br>ApoB<br>HDL-c<br>LDL-c<br>TG<br>Total-c            | <b>ApoA-I</b> : Significant decrease in E3/E3<br><b>HDL-c</b> : Significant decrease in E3/E3                                                                                                                                                                                                                                                                                                                                                                                                                                                                                                                                                                                                                                                                         |
| Pishva et al. 2010 (53)       | Single-Arm Clinical Trial                                            | Single SNP  | Adults with hypertriglyceridemia (n=46)                                          | 8 weeks                                      | <i>FABP2</i> , Ala54Thr (rs1799883)                                                                        | <i>FABP2</i> : 4q26                                                      | 2.0 g/day pure EPA (supplement)                                                                                         | Ala54Ala (GG) vs. Thr54 carriers (GT+TT)                                                                                   | ApoB<br>ApoC-III<br>HDL-c<br>LDL-c<br>TG<br>Total-c          | <b>ApoC-III</b> : In response to EPA supplementation, significantly greater reductions in ApoC-III in GT+TT genotypes of rs1799883 compared to GG genotype.<br><b>HDL-c</b> : In response to EPA supplementation, significantly greater increases in HDL-c in GT+TT genotypes of rs1799883 compared to GG genotype.<br><b>LDL-c</b> : In response to EPA supplementation, LDL-c significantly decreased in GG genotypes of rs1799883 but not GT+TT genotypes.<br><b>TG</b> : In response to EPA supplementation, significantly greater reductions in TG in GT+TT genotypes of rs1799883 compared to GG genotype.                                                                                                                                                      |
| Pishva et al.                 | Single-Arm                                                           | Single SNP  | Adults with                                                                      | 8 weeks                                      | <i>PPARα</i> ,                                                                                             | <i>PPARα</i> : 22q13.31                                                  | 2.0 g/day pure                                                                                                          | Leu162                                                                                                                     | ApoB                                                         | --                                                                                                                                                                                                                                                                                                                                                                                                                                                                                                                                                                                                                                                                                                                                                                    |

|                            |                                                           |                   |                                                                                       |                            |                                                                                                                                                                                                                            |                                                                                                                                                          |                                                                  |                                                                                                        |                                                  |                                                                                                                                                                                                                                                                                                                                                                                                                                         |
|----------------------------|-----------------------------------------------------------|-------------------|---------------------------------------------------------------------------------------|----------------------------|----------------------------------------------------------------------------------------------------------------------------------------------------------------------------------------------------------------------------|----------------------------------------------------------------------------------------------------------------------------------------------------------|------------------------------------------------------------------|--------------------------------------------------------------------------------------------------------|--------------------------------------------------|-----------------------------------------------------------------------------------------------------------------------------------------------------------------------------------------------------------------------------------------------------------------------------------------------------------------------------------------------------------------------------------------------------------------------------------------|
| 2014 (54)                  | Clinical Trial                                            |                   | hypertriglyceridemia (n=46)                                                           |                            | Leu162Val (rs1800206)<br><i>PPARA</i> ,<br>Intron 7 SNP                                                                                                                                                                    |                                                                                                                                                          | EPA (supplement)                                                 | vs. Val162 carriers<br><br><i>and</i><br><br>Intron 7 GG vs. Intron 7 GC                               | ApoCIII<br>HDL-c<br>LDL-c<br>TG<br>Total-c       |                                                                                                                                                                                                                                                                                                                                                                                                                                         |
| Roke and Mutch, 2014 (55)  | Single-Arm Clinical Trial                                 | Single SNP        | Men aged 18-25 years (n=12)                                                           | 12 weeks (+8 week washout) | <i>FADS1</i> , rs174537<br><i>FADS2</i> , rs174576 (LD=1.0 therefore presented results for rs174537)                                                                                                                       | <i>FADS1/2</i> : 11q12.2                                                                                                                                 | Fish oil containing 1.8 g/d EPA+DHA (supplement)                 | Major allele homozygotes vs. Minor allele carriers                                                     | HDL-c<br>LDL-c<br>TG<br>Total-c<br>Total-c:HDL-c | --                                                                                                                                                                                                                                                                                                                                                                                                                                      |
| Rudkowska et al. 2014 (56) | Single-Arm Clinical Trial                                 | Single SNP        | Healthy men and women aged 18-50 (n=210)                                              | 6 weeks                    | <i>SCD1</i> , rs1502593, rs522951, rs11190480, rs3071, rs3829160, rs2234970, rs10883463, rs508384                                                                                                                          | <i>SCD1</i> : 10q24.31                                                                                                                                   | Fish oil containing 1.9-2.2 g/d EPA + 1.1 g/d DHA (supplement)   | Comparison between three genotypes                                                                     | HDL-c<br>LDL-c<br>TG<br>Total-c<br>Total-c:HDL-c | <b>TG:</b> For <i>SCD1</i> rs508384, AA genotype was associated with lower TG than CA and CC genotypes both pre- and post-supplementation.                                                                                                                                                                                                                                                                                              |
| Rudkowska et al. 2014 (57) | Single-Arm Clinical Trial                                 | Nutrigenomic GWAS | Healthy men and women aged 18-50 (n=141) + Replication of GRS in FINGEN study (n=310) | 6 weeks                    | Genetic Risk Score including:<br><i>IQCJ-SCHIP1</i> (4 SNPs),<br><i>SLIT2</i> (3 SNPs),<br><i>PHF17</i> (3 SNPs),<br><i>MYB</i> (1 SNP),<br><i>NXP1</i> (1SNP),<br><i>NELLI</i> (1SNP) [outlined in Supplementary Table 5] | <i>IQCJ-SCHIP1</i> : 3q25.32<br><i>SLIT2</i> : 4p15.31<br><i>PHF17</i> : 4q28.2<br><i>MYB</i> : 6q23.3<br><i>NXP1</i> : 7p21.3<br><i>NELLI</i> : 11p15.1 | Fish oil containing 1.9-2.2 g/d EPA + 1.1 g/d DHA (supplement)   | Responders versus non-responders (i.e. TG response) to supplementation                                 | TG                                               | Thirteen SNPs were associated with TG response to omega-3 supplementation and 10 were used in the GRS calculation. The GRS was significantly associated with TG response.<br><br><b>TG:</b> The GRS explained 21.5% of the variation in TG response when adjusted for age, sex and BMI. Replication of this GRS in the FINGEN study: the GRS explained 2.0% of the TG change but the association as NS (adjusted for age, sex and BMI). |
| Scorletti et al. 2015 (58) | Randomized, Placebo-Controlled, Double-Blind Intervention | Single SNP        | Men and women with non-alcoholic fatty liver disease (n=95)                           | 15-18 months               | <i>PNPLA3</i> , 1148M (rs738409)<br><i>TM6SF2</i> , E167K (rs58542926)                                                                                                                                                     | <i>PNPLA3</i> : 22q13.31<br><i>TM6SF2</i> : 19p13.11                                                                                                     | 1.8 g/day EPA+ 1.5 g/day DHA (supplement)                        | Comparison between three genotypes<br><i>and</i><br>Major allele homozygotes vs. Minor allele carriers | TG                                               | --                                                                                                                                                                                                                                                                                                                                                                                                                                      |
| Thifault et al. 2013 (59)  | Single-Arm Clinical Trial                                 | Single SNP*       | Healthy men and women with overweight or obesity aged 18-50 (n=210)                   | 6 weeks                    | <i>APOE</i> , rs429358, rs7412                                                                                                                                                                                             | <i>APOE</i> : 19q13.32                                                                                                                                   | Fish oil containing 1.9-2.2 g/d EPA and 1.1 g/d DHA (supplement) | <i>APOE</i> -E2 vs. <i>APOE</i> -E3 vs. <i>APOE</i> -E4                                                | apoB<br>HDL-c<br>LDL-c<br>TG<br>Total-c          | --                                                                                                                                                                                                                                                                                                                                                                                                                                      |
| Tremblay et                | Single-Arm                                                | Single SNP        | Healthy men                                                                           | 6 weeks                    | <i>PLA2G2A</i> (5)                                                                                                                                                                                                         | <i>PLA2G2A</i> :                                                                                                                                         | Fish oil containing                                              | Major allele                                                                                           | apoB-100                                         | <b>TG:</b> omega-3 supplementation significantly reduced TG in                                                                                                                                                                                                                                                                                                                                                                          |

|                                  |                                                                  |                                |                                                                       |                   |                                                                                                                                                                                                                  |                                                                                                                                                                             |                                                                                    |                                                                                                               |                                 |                                                                                                                                                                                                                                                                                                                                                                                                                                                                                                                                                                                                                                                                                                                                                                                                                                                                                                                                                                                                                                                                       |
|----------------------------------|------------------------------------------------------------------|--------------------------------|-----------------------------------------------------------------------|-------------------|------------------------------------------------------------------------------------------------------------------------------------------------------------------------------------------------------------------|-----------------------------------------------------------------------------------------------------------------------------------------------------------------------------|------------------------------------------------------------------------------------|---------------------------------------------------------------------------------------------------------------|---------------------------------|-----------------------------------------------------------------------------------------------------------------------------------------------------------------------------------------------------------------------------------------------------------------------------------------------------------------------------------------------------------------------------------------------------------------------------------------------------------------------------------------------------------------------------------------------------------------------------------------------------------------------------------------------------------------------------------------------------------------------------------------------------------------------------------------------------------------------------------------------------------------------------------------------------------------------------------------------------------------------------------------------------------------------------------------------------------------------|
| al. 2015 (60)                    | Clinical Trial                                                   |                                | and women aged 18-50 years ( $n=208$ )                                |                   | SNPs),<br><i>PLA2G2C</i> (6 SNPs),<br><i>PLA2G2D</i> (8 SNPs),<br><i>PLA2G2F</i> (6 SNPs),<br><i>PLA2G4A</i> (22 SNPs),<br><i>PLA2G6</i> (5 SNPs),<br><i>PLA2G7</i> (9 SNPs) [outlined in Supplementary Table 5] | 1p36.13<br><i>PLA2G2C</i> : 1p36.13<br><i>PLA2G2D</i> : 1p36.12<br><i>PLA2G2F</i> : 1p36.12<br><i>PLA2G4A</i> : 1q31.1<br><i>PLA2G6</i> : 22q13.1<br><i>PLA2G7</i> : 6p12.3 | 1.9 g/d EPA + 1.1 g/d DHA (supplement)                                             | homozygotes vs. Minor allele carriers or Comparison between three genotypes (depending on allele frequencies) | HDL-c<br>LDL-c<br>TG<br>Total-c | <i>PLA2G7</i> rs1805018 as well as <i>PLA2G4A</i> rs10752979, rs10737277, rs7540602 and rs3820185; in the linear regression model, <i>PLA2G6</i> rs132989, <i>PLA2G7</i> rs679667, <i>PLA2G2D</i> rs12045689, <i>PLA2G4A</i> rs10752979 and rs1160719 together explained 5.9% of post-supplementation TG levels                                                                                                                                                                                                                                                                                                                                                                                                                                                                                                                                                                                                                                                                                                                                                       |
| Vallée Marcotte et al. 2016 (61) | Single-Arm Clinical Trial                                        | Nutrigenomic GWAS              | Men and woman aged 18-50 years ( $n=208$ )                            | 6 weeks           | <i>IQCJ</i> (16 SNPs),<br><i>NXPPI</i> (34 SNPs),<br><i>PHF17</i> (8 SNPs),<br><i>MYB</i> (9 SNPs) [outlined in Supplementary Table 5]                                                                           | <i>IQCJ</i> : 3q25.32<br><i>NXPPI</i> : 7p21.3<br><i>PHF17</i> : 4q28.2<br><i>MYB</i> : 6q23.3                                                                              | Fish oil containing 1.9-2.2 g/d EPA + 1.1 g/d DHA (supplement)                     | Comparison between three genotypes                                                                            | TG                              | <b>TG:</b> Significant gene-diet interaction on TG levels pre- vs. post-supplementation for the following SNPs: <i>IQCJ</i> (10 SNPs: rs2044704, rs1962071, rs6800211, rs17782879, rs1868414, rs2595260, rs9827242, rs1449009, rs2621309, rs61332355), <i>NXPPI</i> (4 SNPs: rs7806226, rs7805772, rs2349780, rs6974252), <i>MYB</i> (3 SNPs: rs9321493, rs11154794, rs210962). Four SNPs were still significant after applying the false discovery rate to account for multiple testing: rs1449009, rs2621309, rs61332355 in <i>IQCJ</i> ; rs7805772 in <i>NXPPI</i> . There were four dominant SNPs driving the association with the TG response: rs61332355 and rs9827242 in <i>IQCJ</i> , rs7805772 in <i>NXPPI</i> and rs11154794 in <i>MYB</i> . Significant differences in genotype frequencies between positive and negative responders to omega-3 for TG changes for <i>IQCJ</i> rs2044704, rs1962071, rs17782879, rs1868414, rs2595260, rs9827242, rs1449009, rs2621309, rs61332355, <i>NXPPI</i> rs7806226, rs7805772, <i>MYB</i> rs11154794 and rs210936. |
| Vallée Marcotte et al. 2019 (62) | Single-Arm Clinical Trial (replication of GRS in a novel cohort) | Nutrigenomic GWAS              | Healthy adults of Mexican descent aged 18-40 years ( $n=191$ )        | 6 weeks           | Genetic Risk Score including 103 SNPs: [outlined in Supplementary Table 5]                                                                                                                                       | NA                                                                                                                                                                          | Fish oil containing 1.9 g/day EPA + 0.8 g/day DHA (supplement)                     | Responders versus non-responders (i.e. TG response) to supplementation                                        | TG                              | <b>TG:</b> A first 7-SNP GRS [SNPs selected based on previously developed GRS (57.61)] did not explain TG variation. A second GRS calculated from 103 SNPs significantly explained 4.4% of TG variation. A third GRS including the 5 most relevant SNPs significantly explained 11.0% of TG variation ( <i>NXPPI</i> rs10265408, rs10486228, rs10486228, rs17150341, rs6974252 and <i>IQCJ-SCHIP1</i> rs2595241). When subjects with the lowest TG change were not included, this third GRS explained more TG variation. Including only the 28 responders and 28 non-responders with the greatest TG variation, this third GRS explained 29.1% of TG variation.                                                                                                                                                                                                                                                                                                                                                                                                       |
| Vallée Marcotte et al. 2019 (63) | Single-Arm Clinical Trial                                        | Nutrigenomics GWAS (polygenic) | Men and woman aged 18-50 years with overweight or obesity ( $n=208$ ) | 6 weeks           | GWAS; GRS included 31 SNPs [outlined in Supplementary Table 5]                                                                                                                                                   | NA                                                                                                                                                                          | Fish oil containing 1.9-2.2g/d EPA + 1.1g/d DHA (supplement)                       | Responders to omega-3 supplementation for TG reduction vs. Non-Responders                                     | TG                              | <b>TG:</b> 31 SNPs associated with TG response to omega-3 supplementation and used in GRS calculation; Lower GRSs were significantly more responsive to omega-3 supplementation for TG reduction compared to higher GRS (GRS accounted for 49.7% of TG responses); These findings were replicated in the FINGEN study with 23 SNPs (GRS accounted for 3.7% of TG responses).                                                                                                                                                                                                                                                                                                                                                                                                                                                                                                                                                                                                                                                                                          |
| Vallée Marcotte et al. 2020 (64) | Double-Blind, Randomized, Controlled, Crossover Intervention     | Nutrigenomics GWAS (polygenic) | Men and women with abdominal obesity and elevated CRP aged 18-70      | 10 weeks per diet | GRS included 30 SNPs [outlined in Supplementary Table 5]                                                                                                                                                         | NA                                                                                                                                                                          | Control oil: 3 g/d corn oil<br>Pure EPA: 2.7 g/d<br>Pure DHA: 2.7 g/d (supplement) | Responders to different types of omega-3 supplementation for TG reduction vs.                                 | TG                              | <b>TG:</b> The GRS was significantly associated with responsiveness to EPA for TG reduction when comparing responders vs. non-responders vs. adverse responders (trend, $p=0.08$ , for DHA). The GRS was significantly associated with responsiveness to both EPA and DHA for TG reduction when comparing responders vs. adverse responders.                                                                                                                                                                                                                                                                                                                                                                                                                                                                                                                                                                                                                                                                                                                          |



|                        |                                                                      |                          | years (n=122)                                                                                                |          |                                                                                 |                                                                         |                                                                                                  | Non-Responders vs. Adverse Responders and Responders vs. Adverse Responders                                      |                                                  |                                                                                                                                                                                                                                                                                                                                                                                                                                                                                                                                                                                                                                                                              |
|------------------------|----------------------------------------------------------------------|--------------------------|--------------------------------------------------------------------------------------------------------------|----------|---------------------------------------------------------------------------------|-------------------------------------------------------------------------|--------------------------------------------------------------------------------------------------|------------------------------------------------------------------------------------------------------------------|--------------------------------------------------|------------------------------------------------------------------------------------------------------------------------------------------------------------------------------------------------------------------------------------------------------------------------------------------------------------------------------------------------------------------------------------------------------------------------------------------------------------------------------------------------------------------------------------------------------------------------------------------------------------------------------------------------------------------------------|
| Wu et al. 2014 (65)    | Double-Blind, Randomized, Placebo-Controlled, Crossover Intervention | Single SNP               | Men and women with moderate risk of CVD (n=84)                                                               | 8 weeks  | <i>eNOS</i> Glu298Asp (rs1799983)                                               | <i>NOS3</i> : 7q36.1                                                    | Fish oil containing 0.9 g/day EPA + 0.6 g/day DHA (supplement)                                   | Major allele homozygotes (GG) vs. Minor allele carriers (GT+TT)                                                  | LDL-c<br>HDL-c<br>TG<br>Total-c                  | --                                                                                                                                                                                                                                                                                                                                                                                                                                                                                                                                                                                                                                                                           |
| Zheng et al. 2018 (66) | Double-Blind, Randomized, Controlled Intervention                    | Single SNP and Polygenic | Men and women with type 2 diabetes aged 35-80 years for men or postmenopausal and 80 years for women (n=139) | 25 weeks | <i>CD36</i> , rs1527483<br><i>NOS3</i> , rs1799983<br><i>PPARγ2</i> , rs1801282 | <i>CD36</i> : 7q21.11<br><i>NOS3</i> : 7q36.1<br><i>PPARγ2</i> : 3p25.2 | Fish oil: 2.0 g/d EPA and DHA<br>Flaxseed oil: 2.5 g/d ALA<br>Control oil: corn oil (supplement) | Major allele homozygotes vs. Minor allele carriers and High vs. low genetic score calculated based on three SNPs | HDL-c<br>LDL-c<br>TG<br>Total-c:HDL-c<br>Total-c | <b>LDL-c</b> : significant interaction for <i>PPARγ2</i> rs1801282 genotype, intervention group and LDL-c change; but increased LDL-c in G allele carriers of <i>PPARγ2</i> rs1801282 compared to CC genotype <i>only in the control</i> (corn oil) group<br><b>TG</b> : omega-3 fish oil (but not flaxseed oil) supplementation reduced TG for individuals with the <i>CD36</i> rs1527483 GG genotype (significant interaction); significant interaction between genetic score and omega-3 on TG levels whereby omega-3 (fish oil and flaxseed oil) supplementation significantly reduced TG levels compared to control <i>only in individuals with high genetic scores</i> |

ALA: alpha-linolenic acid, Apo: apolipoprotein, DHA: docosahexaenoic acid, EPA: eicosapentaenoic acid, HDL: high-density lipoprotein cholesterol, LDL: low-density lipoprotein cholesterol, omega-3: omega-3, N/A: not applicable, NS: Non-significant, sdLDL-c: small, dense, low-density lipoprotein cholesterol, SNP: single nucleotide polymorphism, TG: triglycerides

1. All other (not listed) gene/omega-3/lipid/lipoprotein results of interest to the present review were NS

Participants are described as "healthy" for studies that incorporated exclusion criteria for certain conditions, blood lipid levels, etc. and when studies described the population as "healthy."

'-' indicates that all the completed gene/omega-3/lipid/lipoprotein analyses were NS

\*Human *APOE* is polymorphic at two single nucleotides (rs429358 and rs7412) resulting in three different alleles ( $\epsilon 2$ ,  $\epsilon 3$  and  $\epsilon 4$ )

**Supplementary Table 4: Genes, SNPs, lipid/lipoprotein outcomes and studies included in evidence grading process and guideline development**

| Gene, SNP(s)                                | Outcome | Studies                                                                                                                                                                                                                                                              |
|---------------------------------------------|---------|----------------------------------------------------------------------------------------------------------------------------------------------------------------------------------------------------------------------------------------------------------------------|
| <i>APOE</i> : rs429358, rs7412              | TG      | AbuMweis et al. 2018 (24)<br>Carvalho-Wells et al. 2012 (32)<br>Caslake et al. 2008 (34)<br>Dang et al. 2015 (36)<br>Jackson et al. 2012 (41)<br>Olano-Martin et al. 2010 (49)<br>Minihane et al. 2000 (48)<br>Paschos et al. 2005 (52)<br>Thifault et al. 2013 (59) |
| <i>APOE</i> : rs429358, rs7412              | Total-c | Fallaize et al. 2016 (7)<br>AbuMweis et al. 2018 (24)<br>Carvalho-Wells et al. 2012 (32)<br>Caslake et al. 2008 (34)<br>Dang et al. 2015 (36)<br>Jackson et al. 2012 (41)<br>Olano-Martin et al. 2010 (49)<br>Paschos et al. 2005 (52)<br>Thifault et al. 2013 (59)  |
| <i>PPAR<math>\gamma</math>2</i> : rs1801282 | LDL-c   | Binia et al. 2017 (27)<br>Harsløf et al. 2014 (39)<br>Itariu et al. 2012 (40)<br>Lindi et al. 2003 (43)<br>Zheng et al. 2018 (66)                                                                                                                                    |
| <i>PPAR<math>\gamma</math>2</i> : rs1801282 | Total-c | Binia et al. 2017 (27)<br>Harsløf et al. 2014 (39)<br>Itariu et al. 2012 (40)<br>Lindi et al. 2003 (43)<br>Zheng et al. 2018 (66)                                                                                                                                    |
| <i>PPAR<math>\gamma</math>2</i> : rs1801282 | TG      | Binia et al. 2017 (27)<br>Harsløf et al. 2014 (39)<br>Itariu et al. 2012 (40)<br>Lindi et al. 2003 (43)<br>Zheng et al. 2018 (66)                                                                                                                                    |
| <i>CD36</i> : rs1761667                     | HDL-c   | Dawczynski et al. 2013 (37)<br>Madden et al. 2008 (45)                                                                                                                                                                                                               |
| <i>CD36</i> : rs1761667                     | TG      | Dawczynski et al. 2013 (37)<br>Madden et al. 2008 (45)                                                                                                                                                                                                               |
| <i>CD36</i> : rs1049673                     | HDL-c   | Dawczynski et al. 2013 (37)<br>Madden et al. 2008 (45)                                                                                                                                                                                                               |
| <i>CD36</i> : rs1527483                     | TG      | Madden et al. 2008 (45)<br>Zheng et al. 2018 (66)                                                                                                                                                                                                                    |
| <i>FADS</i> : rs174547*                     | Total-c | Dumont et al. 2011 (5)<br>Dumont et al. 2018 (6)<br>Lu et al. 2010 (17)<br>Standl et al. 2012 (20)<br>Alsaleh et al. 2014 (25)<br>AbuMweis et al. 2018 (24)<br>Roke et al. 2014 (55)                                                                                 |
| 31-SNP Genetic Risk Score                   | TG      | Vallée Marcotte et al. 2019 (67)<br>Vallée Marcotte et al. 2020 (64)                                                                                                                                                                                                 |

**Supplementary Table 5: Additional list of gene(s) and SNP(s) tested in studies**

| Study                                                     | Gene(s), SNP(s)                                                                                                                                                                                                                                                                                                                                                                                                                                                                                                                                                              |
|-----------------------------------------------------------|------------------------------------------------------------------------------------------------------------------------------------------------------------------------------------------------------------------------------------------------------------------------------------------------------------------------------------------------------------------------------------------------------------------------------------------------------------------------------------------------------------------------------------------------------------------------------|
| Chen et al. Int J Obes;43:808-820 (2019)                  | <p><i>FADS2</i>, rs174599, rs174601, rs556656, rs11501631, rs74771917, rs3168072, rs182008711, rs73487492, rs174602, rs12577276</p> <p><i>FADS3</i>, rs191972868, rs115905177, rs174635, rs174634, rs174454, rs12292968, rs174570, rs7930349, rs116672159, rs116139751, rs7942717, rs7115739, rs174450, rs74626285</p> <p><i>RAB31L1</i>, rs741887, rs2521561, rs2727258, rs2524288, rs117518711, rs74957100, rs77071864, rs78243280, rs741888, rs2524287, rs12420625, rs77229376, rs187943834, rs78156005, rs190738753, rs11230827, rs76133863, rs116985542, rs73491252</p> |
| Cormier et al. Nutrients;4:1026-41 (2012)                 | <p><i>FADS</i> gene cluster rs174456, rs174627, rs482548, rs2072114, rs12807005, rs174448, rs2845573, rs7394871, rs7942717, rs74823126, rs174602, rs498793, rs7935946, rs174546, rs174570, rs174579, rs174611, rs174616, rs968567</p>                                                                                                                                                                                                                                                                                                                                        |
| Vallée Marcotte et al. Am J Clin Nutr;109:176–185 (2019)  | <p><i>IQCJ-SCHIP1</i>, rs7639707, rs62270407</p> <p><i>NXPH1</i>, rs61569932, rs1990554, rs6463808, rs6966968, rs28473103, rs28673635, rs12702829, rs78943417, rs293180, rs1837523</p> <p><i>PHF17</i>, rs1216346, rs114348423, rs75007521</p> <p><i>MYB</i>, rs72560788, rs72974149, rs210962, rs6933462</p> <p><i>NELL1</i>, rs79624996, rs1850875, rs78786240, rs117114492</p> <p><i>SLIT2</i>, rs184945470, rs143662727, rs10009109, rs10009535, rs61790364, rs73241936, rs16869663, rs76015249</p>                                                                      |
| Tremblay et al. Lipids in Health and Disease (2015) 14:12 | <p><i>PLA2G2A</i>, rs876018, rs955587, rs3753827, rs11573156, rs11573142</p> <p><i>PLA2G2C</i>, rs6426616, rs12139100, rs10916716, rs2301475, rs10916712, rs10916718</p> <p><i>PLA2G2D</i>, rs578459, rs16823482, rs3736979, rs584367, rs12045689, rs679667, rs17354769, rs1091671</p> <p><i>PLA2G2F</i>, rs12065685, rs6657574, rs11582551, rs818571, rs631134, rs11583904</p> <p><i>PLA2G4A</i>, rs979924, rs2076075, rs3736741, rs10911949, rs10752979, rs1160719, rs10737277, rs12720702, rs7522213,</p>                                                                 |

|                                                              |                                                                                                                                                                                                                                                                                                                                                                                                                                                                                                                                                                                                                                                        |
|--------------------------------------------------------------|--------------------------------------------------------------------------------------------------------------------------------------------------------------------------------------------------------------------------------------------------------------------------------------------------------------------------------------------------------------------------------------------------------------------------------------------------------------------------------------------------------------------------------------------------------------------------------------------------------------------------------------------------------|
|                                                              | <p>rs7540602, rs10157410, rs12720497, rs4651331, rs1569480, rs10911935, rs12353944, rs11576330, rs10489410, rs10911946, rs3820185, rs12746200, rs11587539</p> <p><i>PLA2G6</i>, rs5750546, rs132989, rs133016, rs2235346, rs2284060</p> <p><i>PLA2G7</i>, rs12195701, rs12528807, rs1421368, rs1421378, rs17288905, rs1805017, rs1805018, rs6929105, rs7756935</p>                                                                                                                                                                                                                                                                                     |
| Ouellette et al. J Nutrigenet Nutrigenomics;6:268–280 (2013) | <p><i>GPAM</i>, rs17129561, rs10787428, rs2792751</p> <p><i>AGPAT3</i>, rs999519, rs2838440, rs2838445, rs2838458, rs4818873, rs9978441, rs9982600, rs11700575, rs17004619, rs2838452, rs2838456, rs3788086, rs2838429</p> <p><i>AGPAT4</i>, rs746731, rs747866, rs1125640, rs2277092, rs2293286, rs3757025, rs3798225, rs3798920, rs3798924, rs3798929, rs3798943, rs3798945, rs3822853, rs3823058, rs4709501, rs6906489, rs6923835, rs7750302, rs7769321, rs9458172, rs10945713, rs10945719, rs11965825, rs12202278, rs17627837, rs12524665, rs1001422, rs6455711, rs9456642, rs2064721, rs3778227, rs3798922, rs11967514, rs7768457, rs12662114</p> |
| Ouellette et al. Lipids in Health and Disease, 13:86 (2014)  | <p><i>MGLL</i>, rs782440, rs16826716, rs6776142, rs9877819, rs555183, rs6780384, rs13076593, rs605188, rs6765071, rs782444, rs549662, rs3773155, rs541855, rs6439081, rs6439082, rs6787155, rs1466571, rs893294</p>                                                                                                                                                                                                                                                                                                                                                                                                                                    |
| Bouchard-Mercier et al. Genes Nutr 9:395 (2014)              | <p><i>GCK</i>, rs2268573, rs2908297, rs2971676, rs758989, rs12673242, rs2908290, rs2284777, rs2300584, rs1990458, rs741038, rs1799884, rs2908277, rs3757838</p>                                                                                                                                                                                                                                                                                                                                                                                                                                                                                        |
| Bouchard-Mercier et al. Nutrients, 6, 1145-1163 (2014)       | <p><i>RXRA</i>, rs10881576, rs7871655, rs12339187, rs11185660, rs11103473, rs10776909, rs12004589, rs3132301, rs1805352, rs3132294, rs1805343, rs1045570</p> <p><i>CPT1A</i>, rs3019598, rs897048, rs7942147, rs4930248, rs11228364, rs11228368, rs10896371, rs1017640, rs613084</p> <p><i>ACADVL</i>, rs2017365</p> <p><i>ACAA2</i>, rs529556, rs10502901, rs631536, rs1942421, rs2276168, rs7237253</p> <p><i>ABCD2</i>, rs4072006, rs10877201, rs12582802, rs4294600, rs11172696, rs10877173, rs7133376, rs7968837</p> <p><i>ACO1</i>, rs10852766, rs3744033, rs12430, rs8065144, rs11651351, rs3643, rs7213998, rs17583163</p>                     |

|                                                                  |                                                                                                                                                                                                                                                                                                                                                                                                                                                                                                                                                                                                                               |
|------------------------------------------------------------------|-------------------------------------------------------------------------------------------------------------------------------------------------------------------------------------------------------------------------------------------------------------------------------------------------------------------------------------------------------------------------------------------------------------------------------------------------------------------------------------------------------------------------------------------------------------------------------------------------------------------------------|
|                                                                  | <i>ACAA1</i> , rs2239621, rs156265, rs5875                                                                                                                                                                                                                                                                                                                                                                                                                                                                                                                                                                                    |
| AlSaleh et al. Genes Nutr 9:412 (2014)                           | <p><i>CETP</i>, rs3764261, rs247616, rs7205804</p> <p><i>LIPC</i>, rs1532085</p> <p><i>APOB</i>, rs1367117</p> <p><i>ABCG5</i>, <i>ABCG8</i>, rs4299376</p> <p><i>TIMD4</i>, <i>HAVCR1</i>, rs6882076, rs1501908, rs1553318</p> <p><i>GCKR</i>, rs1260326, rs780094</p> <p><i>TRIB1</i>, rs2954022, rs10808546, rs2954029</p> <p><i>ANGPTL3</i>, <i>DOCK7</i>, rs3850634, rs1167998, rs2131925</p> <p><i>FADS1</i>, <i>FADS2</i>, <i>FADS3</i>, rs174550, rs174547, rs174546, rs174583</p> <p><i>GALNT2</i>, rs4846914, rs1321257</p> <p><i>ABCA1</i>, rs4149268</p> <p><i>APOE</i>, <i>APOC1</i>, <i>APOC2</i>, rs439401</p> |
| Vallée Marcotte et al. Genes & Nutrition 15:10 (2020)            | <p><i>IQCJ-SCHIP1</i>, rs7639707, rs62270407</p> <p><i>NXP1</i>, rs61569932, rs1990554, rs6463808, rs6966968, rs28473103, rs28673635, rs12702829, rs78943417, rs293180, rs1837523</p> <p><i>PHF17</i>, rs1216346, rs114348423, rs75007521</p> <p><i>MYB</i>, rs72560788, rs72974149, rs210962, rs6933462</p> <p><i>NELL1</i>, rs79624996, rs1850875, rs78786240, rs117114492</p> <p><i>SLIT2</i>, rs184945470, rs143662727, rs10009109, rs10009535, rs61790364, rs73241936, rs16869663, rs76015249</p>                                                                                                                        |
| Rudkowska et al. Journal of Lipid Research 55 (2014)             | <p><i>IQCJ-SCHIP1</i>, <i>MYB</i>, <i>NELL1</i>, <i>NXP1</i>, <i>PHF17</i>, <i>SLIT2</i>, rs2621308, rs1449009, rs61332355, rs2621309, rs2952724, rs2629715, rs1216352, rs1216365, rs931681, rs6920829, rs6463808, rs752088</p>                                                                                                                                                                                                                                                                                                                                                                                               |
| Vallée Marcotte et al. J Nutrigenet Nutrigenomics;9 :1-11 (2016) | <p><i>IQCJ</i>, rs12497650, rs4501157, rs13091349, rs2044704, rs1062071, rs7634829, rs2621294, rs6800211, rs17782879, rs1868414, rs2595260, rs6763890, rs9827242, rs1449009, rs2621309, rs61332355</p> <p><i>NXP1</i>, rs6956210, rs2107779, rs10273195, rs12216689, rs6963644, rs17150341, rs1013868, rs12537067, rs4318981,</p>                                                                                                                                                                                                                                                                                             |

|                                                         |                                                                                                                                                                                                                                                                                                                                                                                                                                                                                                                                                                                                                                                                                                                                                                                                                                                                                                                                                                                                                                                                                                                                                                                            |
|---------------------------------------------------------|--------------------------------------------------------------------------------------------------------------------------------------------------------------------------------------------------------------------------------------------------------------------------------------------------------------------------------------------------------------------------------------------------------------------------------------------------------------------------------------------------------------------------------------------------------------------------------------------------------------------------------------------------------------------------------------------------------------------------------------------------------------------------------------------------------------------------------------------------------------------------------------------------------------------------------------------------------------------------------------------------------------------------------------------------------------------------------------------------------------------------------------------------------------------------------------------|
|                                                         | <p>rs17153997, rs7801099, rs4725120, rs1859275, rs10238726, rs1012960, rs11767429, rs4333500, rs7793115, rs7799856, rs7806226, rs13221144, rs17406479, rs10486228, rs17154569, rs4141002, rs7805772, rs2349780, rs2107474, rs11769942, rs6952383, rs6974252, rs10265408, rs2189904, rs2057862</p> <p>PHF17, rs2217023, rs4975270, rs11722830, rs12505447, rs6534704, rs13148510, rs13143771, rs13142964</p> <p>MYB, rs9321493, rs11154794, rs210798, rs210936, rs7757388, rs210962, rs17639758, rs1013891, rs2179308</p>                                                                                                                                                                                                                                                                                                                                                                                                                                                                                                                                                                                                                                                                   |
| <p>Vallée Marcotte et al. Nutrients; 11, 737 (2019)</p> | <p><i>IQCJ-SCHIP1</i>, rs12497650, rs4501157, rs13091349, rs2044704, rs1962071, rs7634829, rs2621294, rs6800211, rs17782879, rs1868414, rs2595260, rs6763890, rs1449009, rs61332355, rs12485627, rs2595242, rs7639937, rs9820807, rs1375409, rs1967363, rs9824310, rs11915303, rs9835214, rs11921343, rs13066560, rs1675497, rs9839862, rs16829875, rs17795566, rs9860588, rs16830408, rs17798579, rs2364930, rs9865997, rs2595241, rs7632574, rs2621308</p> <p><i>NXPFI</i>, rs6956210, rs2107779, rs10273195, rs12216689, rs6963644, rs17150341, rs1013868, rs4318981, rs17153997, rs7801099, rs4725120, rs10238726, rs1012960, rs11767429, rs4333500, rs7793115, rs7799856, rs7806226, rs13221144, rs17406479, rs10486228, rs17154569, rs4141002, rs7805772, rs2349780, rs2107474, rs11769942, rs6952383, rs6974252, rs10265408, rs2189904, rs2057862, rs6463808</p> <p><i>PHF17</i>, rs2217023, rs4975270, rs11722830, rs12505447, rs6534704, rs13148510, rs13143771, rs13142964, rs1216352, rs1216365</p> <p><i>MYB</i>, rs9321493, rs11154794, rs210798, rs210936, rs7757388, rs17639758, rs1013891, rs2179308, rs6920829, <i>SLIT2</i>, rs2952724</p> <p><i>NELLI</i>, rs752088</p> |

Supplementary Table 6: 31-SNP Nutri-GRS

| <b>Gene, rs Number</b>          | <b>Alleles<sup>1</sup></b> | <b>Associated Points</b> |
|---------------------------------|----------------------------|--------------------------|
| <i>IQCJ-SCHIP1</i> , rs7639707  | <u>A</u> /G                | +1                       |
| <i>IQCJ-SCHIP1</i> , rs62270407 | C/ <u>T</u>                | -1                       |
| NXPH1, rs61569932,              | <u>G</u> /T                | +1                       |
| NXPH1, rs1990554                | <u>A</u> /C                | +1                       |
| NXPH1, rs6463808                | <u>A</u> /G                | +1                       |
| NXPH1, rs6966968                | <u>A</u> / <u>G</u>        | +1                       |
| NXPH1, rs28473103               | <u>A</u> / <u>G</u>        | -1                       |
| NXPH1, rs28673635               | <u>A</u> / <u>G</u>        | +1                       |
| NXPH1, rs12702829               | <u>C</u> / <u>T</u>        | +1                       |
| NXPH1, rs78943417               | <u>A</u> / <u>T</u>        | -1                       |
| NXPH1, rs293180                 | <u>G</u> / <u>T</u>        | +1                       |
| NXPH1, rs1837523                | <u>C</u> / <u>T</u>        | -1                       |
| <i>PHF17</i> , rs1216346        | <u>C</u> / <u>T</u>        | +1                       |
| <i>PHF17</i> , rs114348423      | <u>A</u> / <u>G</u>        | +1                       |
| <i>PHF17</i> , rs75007521       | <u>G</u> / <u>T</u>        | -1                       |
| <i>MYB</i> , rs72560788         | <u>C</u> / <u>T</u>        | -1                       |
| <i>MYB</i> , rs72974149         | <u>A</u> / <u>G</u>        | -1                       |
| <i>MYB</i> , rs210962           | <u>C</u> / <u>T</u>        | -1                       |
| <i>MYB</i> , rs6933462          | <u>C</u> / <u>G</u>        | +1                       |
| <i>NELLI</i> , rs79624996       | <u>A</u> / <u>G</u>        | +1                       |
| <i>NELLI</i> , rs1850875        | <u>C</u> / <u>T</u>        | +1                       |
| <i>NELLI</i> , rs78786240       | <u>C</u> / <u>T</u>        | -1                       |
| <i>NELLI</i> , rs117114492      | <u>G</u> / <u>T</u>        | +1                       |
| <i>SLIT2</i> , rs184945470      | <u>C</u> / <u>T</u>        | +1                       |
| <i>SLIT2</i> , rs143662727      | <u>A</u> / <u>G</u>        | -1                       |
| <i>SLIT2</i> , rs10009109       | <u>C</u> / <u>T</u>        | +1                       |
| <i>SLIT2</i> , rs10009535       | <u>A</u> / <u>G</u>        | +1                       |
| <i>SLIT2</i> , rs61790364       | <u>A</u> / <u>G</u>        | +1                       |
| <i>SLIT2</i> , rs73241936       | <u>C</u> / <u>T</u>        | +1                       |
| <i>SLIT2</i> , rs16869663       | <u>A</u> / <u>G</u>        | +1                       |
| <i>SLIT2</i> , rs76015249       | <u>A</u> / <u>G</u>        | +1                       |

1. Minor alleles are underlined

For individuals carrying one or two minor alleles, provide the associated number of points (either +1 or -1). For individuals homozygous for the major allele, provide 0 points. Count the overall number of points. Individuals with lower nutri-GRS are more likely to respond to approximately 3.0 g/day EPA+DHA for TG lowering.

## References

1. Bouchard-Mercier A, Godin G, Lamarche B, Pérusse L, Vohl M-C. Effects of Peroxisome Proliferator-Activated Receptors, Dietary Fat Intakes and Gene–Diet Interactions on Peak Particle Diameters of Low-Density Lipoproteins. *J Nutrigenet Nutrigenomics*. 2011;4(1):36–48.
2. Bodhini D, Gaal S, Shatwan I, Ramya K, Ellahi B, Surendran S, et al. Interaction between TCF7L2 polymorphism and dietary fat intake on high density lipoprotein cholesterol. Li S, editor. *PLoS ONE*. 2017 Nov 28;12(11):e0188382.
3. Chen Y, Estampador AC, Keller M, Poveda A, Dalla-Riva J, Johansson I, et al. The combined effects of FADS gene variation and dietary fats in obesity-related traits in a population from the far north of Sweden: the GLACIER Study. *International Journal of Obesity*. 2019 Apr;43(4):808–20.
4. Ching YK, Chin YS, Appukutty M, Ramachandran V, Yu CY, Ang GY, et al. Interaction of Dietary Linoleic Acid and  $\alpha$ -Linolenic Acids with rs174547 in FADS1 Gene on Metabolic Syndrome Components among Vegetarians. *Nutrients*. 2019 Jul;11(7):1686.
5. Dumont J, Huybrechts I, Spinneker A, Gottrand F, Grammatikaki E, Bevilacqua N, et al. FADS1 genetic variability interacts with dietary  $\alpha$ -linolenic acid intake to affect serum non-HDL-cholesterol concentrations in European adolescents. *J Nutr*. 2011 Jul;141(7):1247–53.
6. Dumont J, Goumidi L, Grenier-Boley B, Cottel D, Marécaux N, Montaye M, et al. Dietary linoleic acid interacts with FADS1 genetic variability to modulate HDL-cholesterol and obesity-related traits. *Clinical Nutrition*. 2018 Oct 1;37(5):1683–9.
7. Fallaize R, Celis-Morales C, Macready AL, Marsaux CF, Forster H, O'Donovan C, et al. The effect of the apolipoprotein E genotype on response to personalized dietary advice intervention: findings from the Food4Me randomized controlled trial. *Am J Clin Nutr*. 2016 Sep;104(3):827–36.
8. Fontaine-Bisson B, El-Sohemy A. Genetic polymorphisms of tumor necrosis factor-alpha modify the association between dietary polyunsaturated fatty acids and plasma high-density lipoprotein-cholesterol concentrations in a population of young adults. *J Nutrigenet Nutrigenomics*. 2008;1(5):215–23.
9. Fontaine-Bisson B, Wolever TMS, Connelly PW, Corey PN, El-Sohemy A. NF- $\kappa$ B  $-94$ Ins/Del ATTG polymorphism modifies the association between dietary polyunsaturated fatty acids and HDL-cholesterol in two distinct populations. *Atherosclerosis*. 2009 Jun;204(2):465–70.
10. Hellstrand S, Sonestedt E, Ericson U, Gullberg B, Wirfält E, Hedblad B, et al. Intake levels of dietary long-chain PUFAs modify the association between genetic variation in FADS and LDL-C. *J Lipid Res*. 2012 Jun;53(6):1183–9.
11. Hosseini-Esfahani F, Mirmiran P, Koochakpoor G, Daneshpour MS, Guity K, Azizi F. Some dietary factors can modulate the effect of the zinc transporters 8 polymorphism on the risk of metabolic syndrome. *Sci Rep*. 2017 Dec;7(1):1649.
12. Jang HB, Hwang J-Y, Park JE, Oh JH, Ahn Y, Kang J-H, et al. Intake levels of dietary polyunsaturated fatty acids modify the association between the genetic variation in *PCSK5* and HDL cholesterol. *J Med Genet*. 2014 Dec;51(12):782–8.



13. Joffe YT, van der Merwe L, Carstens M, Collins M, Jennings C, Levitt NS, et al. Tumor Necrosis Factor- $\alpha$  Gene -308 G/A Polymorphism Modulates the Relationship between Dietary Fat Intake, Serum Lipids, and Obesity Risk in Black South African Women. *The Journal of Nutrition*. 2010 May 1;140(5):901–7.
14. Joffe YT, van der Merwe L, Evans J, Collins M, Lambert EV, September A, et al. The tumor necrosis factor- $\alpha$  gene -238 G>A polymorphism, dietary fat intake, obesity risk and serum lipid concentrations in black and white South African women. *Eur J Clin Nutr*. 2012 Dec;66(12):1295–302.
15. Joffe YT, van der Merwe L, Evans J, Collins M, Lambert EV, September A, et al. Interleukin-6 Gene Polymorphisms, Dietary Fat Intake, Obesity and Serum Lipid Concentrations in Black and White South African Women. *Nutrients*. 2014 Jun 24;6(6):2436–65.
16. Lai Chao-Qiang, Corella Dolores, Demissie Serkalem, Cupples L. Adrienne, Adiconis Xian, Zhu Yueping, et al. Dietary Intake of n-6 Fatty Acids Modulates Effect of Apolipoprotein A5 Gene on Plasma Fasting Triglycerides, Remnant Lipoprotein Concentrations, and Lipoprotein Particle Size. *Circulation*. 2006 May 2;113(17):2062–70.
17. Lu Y, Feskens EJ, Dollé ME, Imholz S, Verschuren WM, Müller M, et al. Dietary n-3 and n-6 polyunsaturated fatty acid intake interacts with FADS1 genetic variation to affect total and HDL-cholesterol concentrations in the Doetinchem Cohort Study. *The American Journal of Clinical Nutrition*. 2010 Jul 1;92(1):258–65.
18. Nettleton JA, Volcik KA, Hoogeveen RC, Boerwinkle E. Carbohydrate intake modifies associations between ANGPTL4[E40K] genotype and HDL-cholesterol concentrations in White men from the Atherosclerosis Risk in Communities (ARIC) study. *Atherosclerosis*. 2009 Mar;203(1):214–20.
19. Richardson K, Louie-Gao Q, Arnett DK, Parnell LD, Lai C-Q, Davalos A, et al. The PLIN4 Variant rs8887 Modulates Obesity Related Phenotypes in Humans through Creation of a Novel miR-522 Seed Site. *PLOS ONE*. 2011 Apr 20;6(4):e17944.
20. Standl M, Lattka E, Stach B, Koletzko S, Bauer C-P, von Berg A, et al. FADS1 FADS2 Gene Cluster, PUFA Intake and Blood Lipids in Children: Results from the GINIplus and LISAplus Studies. *PLoS One* [Internet]. 2012 May 21 [cited 2020 Aug 3];7(5). Available from: <https://www.ncbi.nlm.nih.gov/pmc/articles/PMC3357401/>
21. Tai ES, Corella D, Demissie S, Cupples LA, Coltell O, Schaefer EJ, et al. Polyunsaturated Fatty Acids Interact with the PPARA-L162V Polymorphism to Affect Plasma Triglyceride and Apolipoprotein C-III Concentrations in the Framingham Heart Study. *J Nutr*. 2005 Mar 1;135(3):397–403.
22. Volcik KA, Nettleton JA, Ballantyne CM, Boerwinkle E. Peroxisome proliferator-activated receptor alpha genetic variation interacts with n-6 and long-chain n-3 fatty acid intake to affect total cholesterol and LDL-cholesterol concentrations in the Atherosclerosis Risk in Communities Study. *Am J Clin Nutr*. 2008;87:1926–31.
23. Warodomwicht D, Arnett DK, Kabagambe EK, Tsai MY, Hixson JE, Straka RJ, et al. Polyunsaturated Fatty Acids Modulate the Effect of TCF7L2 Gene Variants on Postprandial Lipemia. *The Journal of Nutrition*. 2009 Mar 1;139(3):439–46.

24. AbuMweis SS, Panchal SK, Jones PJH. Triacylglycerol-Lowering Effect of Docosahexaenoic Acid Is Not Influenced by Single-Nucleotide Polymorphisms Involved in Lipid Metabolism in Humans. *Lipids*. 2018;53(9):897–908.
25. AlSaleh A, Maniou Z, Lewis FJ, Hall WL, Sanders TAB, O'Dell SD. Genetic predisposition scores for dyslipidaemia influence plasma lipid concentrations at baseline, but not the changes after controlled intake of n-3 polyunsaturated fatty acids. *Genes Nutr*. 2014 Jul;9(4):412.
26. Armstrong P, Kelley DS, Newman JW, Stagers FE, Hartiala J, Allayee H, et al. Arachidonate 5-Lipoxygenase Gene Variants Affect Response to Fish Oil Supplementation by Healthy African Americans. *J Nutr*. 2012 Aug;142(8):1417–28.
27. Binia A, Vargas-Martínez C, Ancira-Moreno M, Gosoni LM, Montoliu I, Gámez-Valdez E, et al. Improvement of cardiometabolic markers after fish oil intervention in young Mexican adults and the role of PPAR $\alpha$  L162V and PPAR $\gamma$ 2 P12A. *The Journal of Nutritional Biochemistry*. 2017 May;43:98–106.
28. Bouchard-Mercier A, Rudkowska I, Lemieux S, Couture P, Vohl M-C. Polymorphisms, de novo lipogenesis, and plasma triglyceride response following fish oil supplementation. *J Lipid Res*. 2013 Oct;54(10):2866–73.
29. Bouchard-Mercier A, Rudkowska I, Lemieux S, Couture P, Vohl M-C. Polymorphisms in Genes Involved in Fatty Acid  $\beta$ -Oxidation Interact with Dietary Fat Intakes to Modulate the Plasma TG Response to a Fish Oil Supplementation. *Nutrients*. 2014 Mar 18;6(3):1145–63.
30. Bouchard-Mercier A, Rudkowska I, Lemieux S, Couture P, Vohl M-C. An interaction effect between glucokinase gene variation and carbohydrate intakes modulates the plasma triglyceride response to a fish oil supplementation. *Genes Nutr*. 2014 May;9(3):395.
31. Caron-Dorval D, Paquet P, Paradis A-M, Rudkowska I, Lemieux S, Couture P, et al. Effect of the PPAR-Alpha L162V Polymorphism on the Cardiovascular Disease Risk Factor in Response to n-3 Polyunsaturated Fatty Acids. *J Nutrigenet Nutrigenomics*. 2008;1(4):205–12.
32. Carvalho-Wells AL, Jackson KG, Lockyer S, Lovegrove JA, Minihane AM. APOE genotype influences triglyceride and C-reactive protein responses to altered dietary fat intake in UK adults. *The American Journal of Clinical Nutrition*. 2012 Dec 1;96(6):1447–53.
33. Lockyer S, Tzanetou M, Carvalho-Wells AL, Jackson KG, Minihane AM, Lovegrove JA. SATgene dietary model to implement diets of differing fat composition in prospectively genotyped groups (apoE) using commercially available foods. *British Journal of Nutrition*. 2012 Nov;108(9):1705–13.
34. Caslake MJ, Miles EA, Kofler BM, Lietz G, Curtis P, Armah CK, et al. Effect of sex and genotype on cardiovascular biomarker response to fish oils: the FINGEN Study. *The American Journal of Clinical Nutrition*. 2008 Sep 1;88(3):618–29.
35. Cormier H, Rudkowska I, Paradis A-M, Thifault E, Garneau V, Lemieux S, et al. Association between Polymorphisms in the Fatty Acid Desaturase Gene Cluster and the Plasma Triacylglycerol Response to an n-3 PUFA Supplementation. *Nutrients*. 2012 Aug;4(8):1026–41.
36. Dang TM, Conway V, Plourde M. Disrupted fatty acid distribution in HDL and LDL according to apolipoprotein E allele. *Nutrition*. 2015 Jun 1;31(6):807–12.

37. Dawczynski C, Massey KA, Ness C, Kiehintopf M, Stepanow S, Platzer M, et al. Randomized placebo-controlled intervention with n-3 LC-PUFA-supplemented yoghurt: Effects on circulating eicosanoids and cardiovascular risk factors. *Clinical Nutrition*. 2013 Oct 1;32(5):686–96.
38. Ferguson JF, Phillips CM, McMonagle J, Pérez-Martínez P, Shaw DI, Lovegrove JA, et al. NOS3 gene polymorphisms are associated with risk markers of cardiovascular disease, and interact with omega-3 polyunsaturated fatty acids. *Atherosclerosis*. 2010 Aug 1;211(2):539–44.
39. Harsløf LBS, Damsgaard CT, Hellgren LI, Andersen AD, Vogel U, Lauritzen L. Effects on metabolic markers are modified by PPARG2 and COX2 polymorphisms in infants randomized to fish oil. *Genes Nutr*. 2014 May;9(3):396.
40. Itariu BK, Zeyda M, Hochbrugger EE, Neuhofer A, Prager G, Schindler K, et al. Long-chain n-3 PUFAs reduce adipose tissue and systemic inflammation in severely obese nondiabetic patients: a randomized controlled trial. *The American Journal of Clinical Nutrition*. 2012 Nov 1;96(5):1137–49.
41. Jackson KG, Lockyer S, Carvalho-Wells AL, Williams CM, Minihane AM, Lovegrove JA. Dietary fat manipulation has a greater impact on postprandial lipid metabolism than the apolipoprotein E (epsilon) genotype—insights from the SATgene study. *Molecular Nutrition & Food Research*. 2012;56(12):1761–70.
42. Jackson KG, Lockyer S, Carvalho-Wells AL, Williams CM, Minihane AM, Lovegrove JA. Apolipoprotein E (epsilon) genotype has a greater impact on apoB-48 than apoB-100 responses to dietary fat manipulation—insights from the SATgene study. *Molecular Nutrition & Food Research*. 2017;61(4):1600688.
43. Lindi V, Schwab U, Louheranta A, Laakso M, Vessby B, Hermansen K, et al. Impact of the Pro12Ala polymorphism of the PPAR- $\gamma$ 2 gene on serum triacylglycerol response to n-3 fatty acid supplementation. *Molecular Genetics and Metabolism*. 2003 May;79(1):52–60.
44. Lindman AS, Pedersen JI, Hjerkin EM, Arnesen H, Veierød MB, Ellingsen I, et al. The effects of long-term diet and omega-3 fatty acid supplementation on coagulation factor VII and serum phospholipids with special emphasis on the R353Q polymorphism of the FVII gene. *Thromb Haemost*. 2004 Jun;91(6):1097–104.
45. Madden J, Carrero J, Brunner A, Dastur N, Shearman C, Calder P, et al. Polymorphisms in the CD36 gene modulate the ability of fish oil supplements to lower fasting plasma triacyl glycerol and raise HDL cholesterol concentrations in healthy middle-aged men. *Prostaglandins, Leukotrienes and Essential Fatty Acids*. 2008;78:327–35.
46. Markovic O, O'Reilly G, Fussell HelenM, Turner SJ, Calder PC, Howell WM, et al. Role of single nucleotide polymorphisms of pro-inflammatory cytokine genes in the relationship between serum lipids and inflammatory parameters, and the lipid-lowering effect of fish oil in healthy males. *Clinical Nutrition*. 2004 Oct 1;23(5):1084–95.
47. McColley SP, Georgopoulos A, Young LR, Kurzer MS, Redmon JB, Raatz SK. A high-fat diet and the threonine-encoding allele (Thr54) polymorphism of fatty acid-binding protein 2 reduce plasma triglyceride-rich lipoproteins. *Nutrition Research*. 2011 Jul 1;31(7):503–8.

48. Minihane Anne M., Khan Syrah, Leigh-Firbank Elizabeth C., Talmud Philippa, Wright John W., Murphy Margaret C., et al. ApoE Polymorphism and Fish Oil Supplementation in Subjects With an Atherogenic Lipoprotein Phenotype. *Arteriosclerosis, Thrombosis, and Vascular Biology*. 2000 Aug 1;20(8):1990–7.
49. Olano-Martin E, Anil E, Caslake MJ, Packard CJ, Bedford D, Stewart G, et al. Contribution of apolipoprotein E genotype and docosahexaenoic acid to the LDL-cholesterol response to fish oil. *Atherosclerosis*. 2010 Mar;209(1):104–10.
50. Ouellette C, Cormier H, Rudkowska I, Guénard F, Lemieux S, Couture P, et al. Polymorphisms in Genes Involved in the Triglyceride Synthesis Pathway and Marine Omega-3 Polyunsaturated Fatty Acid Supplementation Modulate Plasma Triglyceride Levels. *LFG*. 2013;6(4–5):268–80.
51. Ouellette C, Rudkowska I, Lemieux S, Lamarche B, Couture P, Vohl M-C. Gene-diet interactions with polymorphisms of the MGLL gene on plasma low-density lipoprotein cholesterol and size following an omega-3 polyunsaturated fatty acid supplementation: a clinical trial. *Lipids Health Dis*. 2014 May 24;13:86.
52. Paschos GK, Yiannakouris N, Rallidis LS, Davies I, Griffin BA, Panagiotakos DB, et al. Apolipoprotein E Genotype in Dyslipidemic Patients and Response of Blood Lipids and Inflammatory Markers to Alpha-Linolenic Acid. *Angiology*. 2005 Jan 1;56(1):49–60.
53. Pishva H, Mahboob S-A, Mehdipour P, Eshraghian MR, Mohammadi-Asl J, Hosseini S, et al. Fatty acid-binding protein-2 genotype influences lipid and lipoprotein response to eicosapentaenoic acid supplementation in hypertriglyceridemic subjects. *Nutrition*. 2010 Nov 1;26(11):1117–21.
54. Pishva H, Mehdipour P, Eshraghian MR, Mahboob S-A. Effects of Eicosapentaenoic Acid Supplementation on Lipid and Lipoprotein Profile in Hypertriglyceridemic Subjects with Different Proliferator-activated Receptor Alpha Genotypes. *Int J Prev Med*. 2014 Mar;5(3):333–40.
55. Roke K, Mutch DM. The Role of FADS1/2 Polymorphisms on Cardiometabolic Markers and Fatty Acid Profiles in Young Adults Consuming Fish Oil Supplements. *Nutrients*. 2014 Jun 16;6(6):2290–304.
56. Rudkowska I, Julien P, Couture P, Lemieux S, Tchernof A, Barbier O, et al. Cardiometabolic risk factors are influenced by Stearoyl-CoA Desaturase (SCD) –1 gene polymorphisms and n-3 polyunsaturated fatty acid supplementation. *Molecular Nutrition & Food Research*. 2014;58(5):1079–86.
57. Rudkowska I, Guénard F, Julien P, Couture P, Lemieux S, Barbier O, et al. Genome-wide association study of the plasma triglyceride response to an n-3 polyunsaturated fatty acid supplementation. *J Lipid Res*. 2014 Jul;55(7):1245–53.
58. Scorletti E, West AL, Bhatia L, Hoile SP, McCormick KG, Burdge GC, et al. Treating liver fat and serum triglyceride levels in NAFLD, effects of PNPLA3 and TM6SF2 genotypes: Results from the WELCOME trial. *Journal of Hepatology*. 2015 Dec 1;63(6):1476–83.
59. Thifault E, Cormier H, Bouchard-Mercier A, Rudkowska I, Paradis A-M, Garneau V, et al. Effects of Age, Sex, Body Mass Index and APOE Genotype on Cardiovascular Biomarker Response to an n-3 Polyunsaturated Fatty Acid Supplementation. *LFG*. 2013;6(2):73–82.

60. Tremblay BL, Cormier H, Rudkowska I, Lemieux S, Couture P, Vohl M-C. Association between polymorphisms in phospholipase A2 genes and the plasma triglyceride response to an n-3 PUFA supplementation: a clinical trial. *Lipids in Health and Disease*. 2015 Feb 21;14(1):12.
61. Bastien Vallée Marcotte, Cormier H, Guénard F, Rudkowska I, Lemieux S, Couture P, et al. Novel Genetic Loci Associated with the Plasma Triglyceride Response to an Omega-3 Fatty Acid Supplementation. *J Nutigenet Nutrigenomics*. 2016;9:1–11.
62. Vallée Marcotte B, Guénard F, Marquis J, Charpagne A, Vadillo-Ortega F, Tejero ME, et al. Genetic Risk Score Predictive of the Plasma Triglyceride Response to an Omega-3 Fatty Acid Supplementation in a Mexican Population. *Nutrients* [Internet]. 2019 Mar 29 [cited 2020 Aug 3];11(4). Available from: <https://www.ncbi.nlm.nih.gov/pmc/articles/PMC6521301/>
63. Vallée Marcotte B, Guénard F, Lemieux S, Couture P, Rudkowska I, Calder PC, et al. Fine mapping of genome-wide association study signals to identify genetic markers of the plasma triglyceride response to an omega-3 fatty acid supplementation.
64. Vallée Marcotte B, Allaire J, Guénard F, de Toro-Martín J, Couture P, Lamarche B, et al. Genetic risk prediction of the plasma triglyceride response to independent supplementations with eicosapentaenoic and docosahexaenoic acids: the ComparED Study. *Genes Nutr*. 2020 Dec;15(1):10.
65. Wu S-Y, Mayneris-Perxachs J, Lovegrove JA, Todd S, Yaqoob P. Fish-oil supplementation alters numbers of circulating endothelial progenitor cells and microparticles independently of eNOS genotype. *The American Journal of Clinical Nutrition*. 2014 Nov 1;100(5):1232–43.
66. Zheng J-S, Chen J, Wang L, Yang H, Fang L, Yu Y, et al. Replication of a Gene-Diet Interaction at CD36, NOS3 and PPARG in Response to Omega-3 Fatty Acid Supplements on Blood Lipids: A Double-Blind Randomized Controlled Trial. *EBioMedicine*. 2018 Apr 17;31:150–6.
67. Vallée Marcotte B, Guénard F, Lemieux S, Couture P, Rudkowska I, Calder PC, et al. Fine mapping of genome-wide association study signals to identify genetic markers of the plasma triglyceride response to an omega-3 fatty acid supplementation. *The American Journal of Clinical Nutrition*. 2019 Jan 1;109(1):176–85.
